# Supplementary material for: The immune‐related biomarker TEK inhibits the development of clear cell renal cell carcinoma (ccRCC) by regulating AKT phosphorylation
Source: PubMed Central journal article supplement (PMC7890987; doi:10.1186/s12935-021-01830-1), 2021-02-18
Supplement: 12935_2021_1830_MOESM1_ESM.pdf [file 12935_2021_1830_MOESM1_ESM.pdf]

## Supplementary Data

### **The immune-related biomarker TEK inhibits the development of clear cell renal cell carcinoma (ccRCC) by regulating AKT phosphorylation**

Siming Chen<sup>1</sup>, Mengxue Yu<sup>2,3,4</sup>, Lingao Ju<sup>2,3,4,5</sup>, Gang Wang<sup>2,3,4,5</sup>, Kaiyu Qian<sup>2,3,4,5</sup>, Yu Xiao<sup>1,2,3,4,5</sup>, Xinghuan Wang<sup>1,4,6\*</sup>

<sup>1</sup>Department of Urology, Zhongnan Hospital of Wuhan University, Wuhan, China

<sup>2</sup>Department of Biological Repositories, Zhongnan Hospital of Wuhan University, Wuhan, China

<sup>3</sup>Human Genetics Resource Preservation Center of Hubei Province, Wuhan, China

<sup>4</sup>Wuhan Research Center for Infectious Diseases and Cancer, Chinese Academy of Medical Sciences, Wuhan, China

<sup>5</sup>Laboratory of Precision Medicine, Zhongnan Hospital of Wuhan University, Wuhan, China

<sup>6</sup>Medical Research Institute, Wuhan University, Wuhan, China

**\*Corresponding author:** Dr. Xinghuan Wang, Email: wangxinghuan@whu.edu.cn, Tel. +86-27-6781-3104.

**Running title:** TEK inhibits ccRCC progress

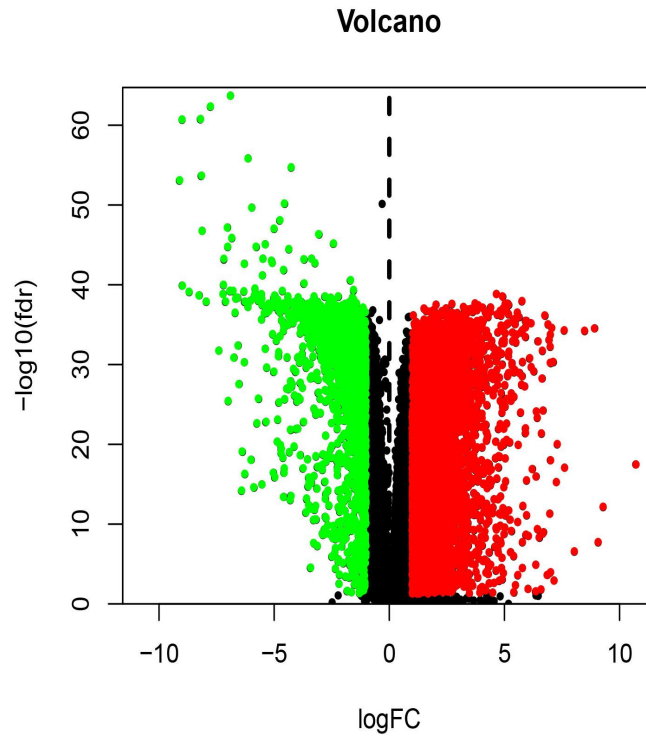

**Supplementary Figure 1. Screening of differentially expressed genes (DEGs) between ccRCC and normal specimens.** The volcano plot visualizes the differentially expressed genes in TCGA.

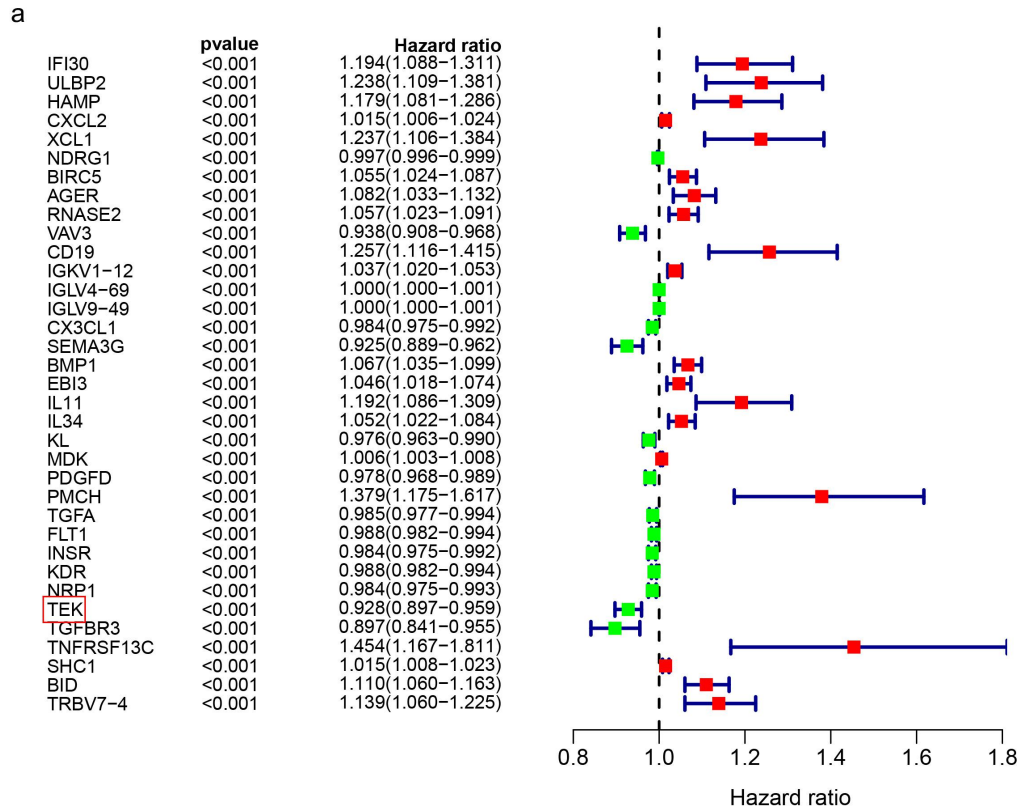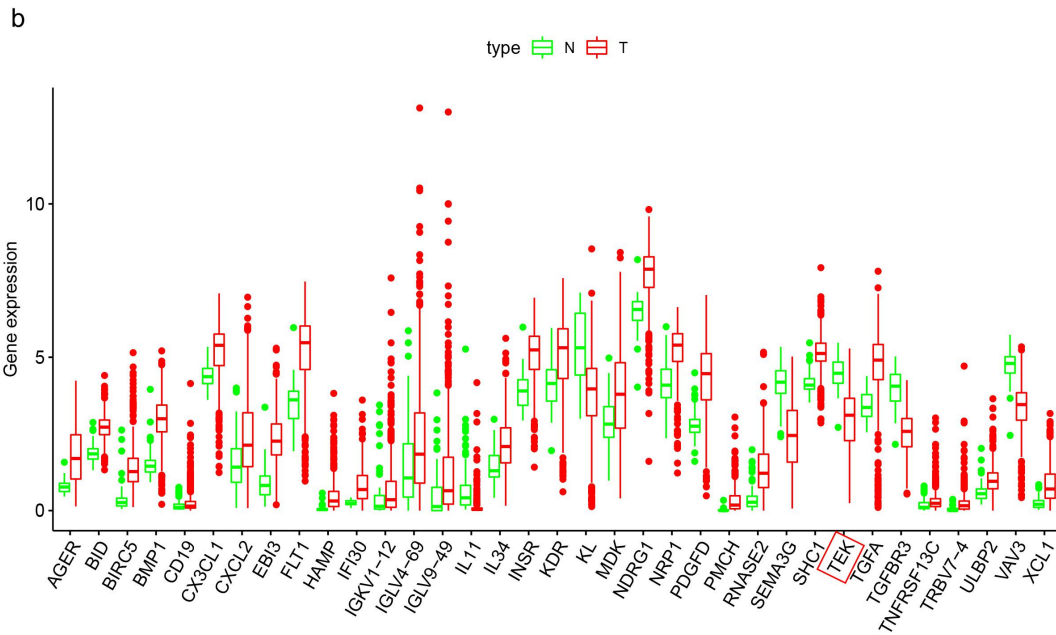

**Supplementary Figure 2. Prognosis-related immune genes. (a)** Forest map of 35 immune differential genes related to prognosis. **(b)** The expression patterns of 35 prognostic-related immune genes in ccRCC and matched normal samples. The red dots represented tumor samples, and green represented normal samples.

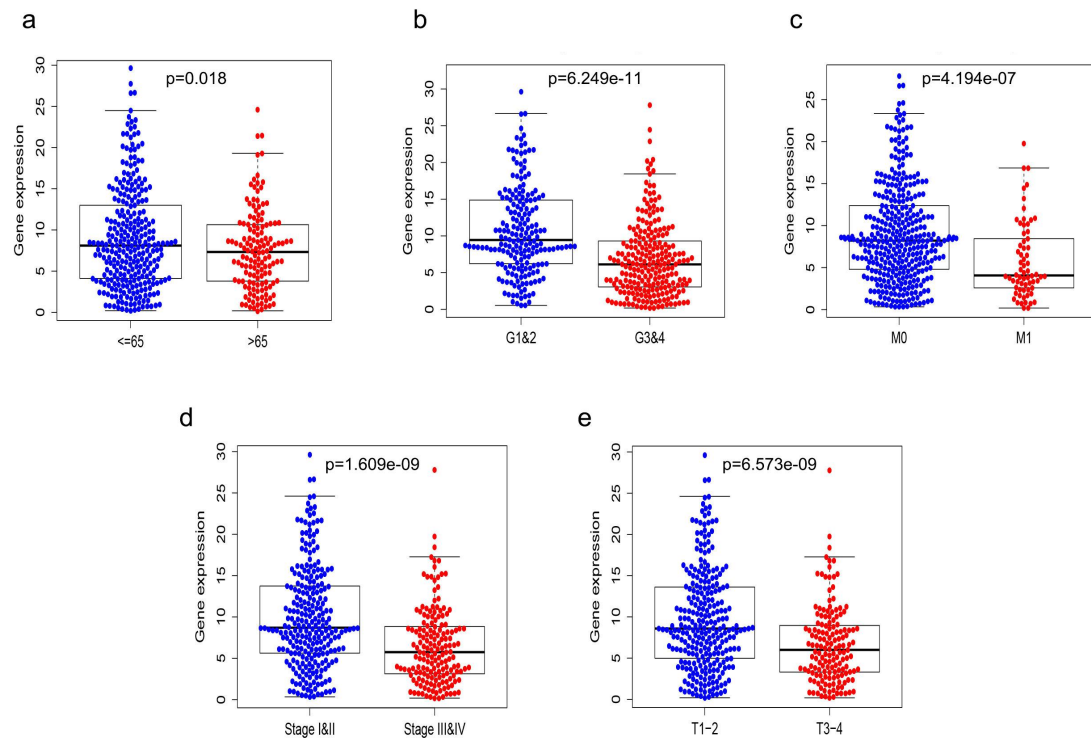

**Supplementary Figure 3. The clinicopathological significance of TEK.** The value of TEK varies in **(a)** age, **(b)** pathological stage, **(c)** M stage, **(d)** clinical stage, and **(e)** T stage.

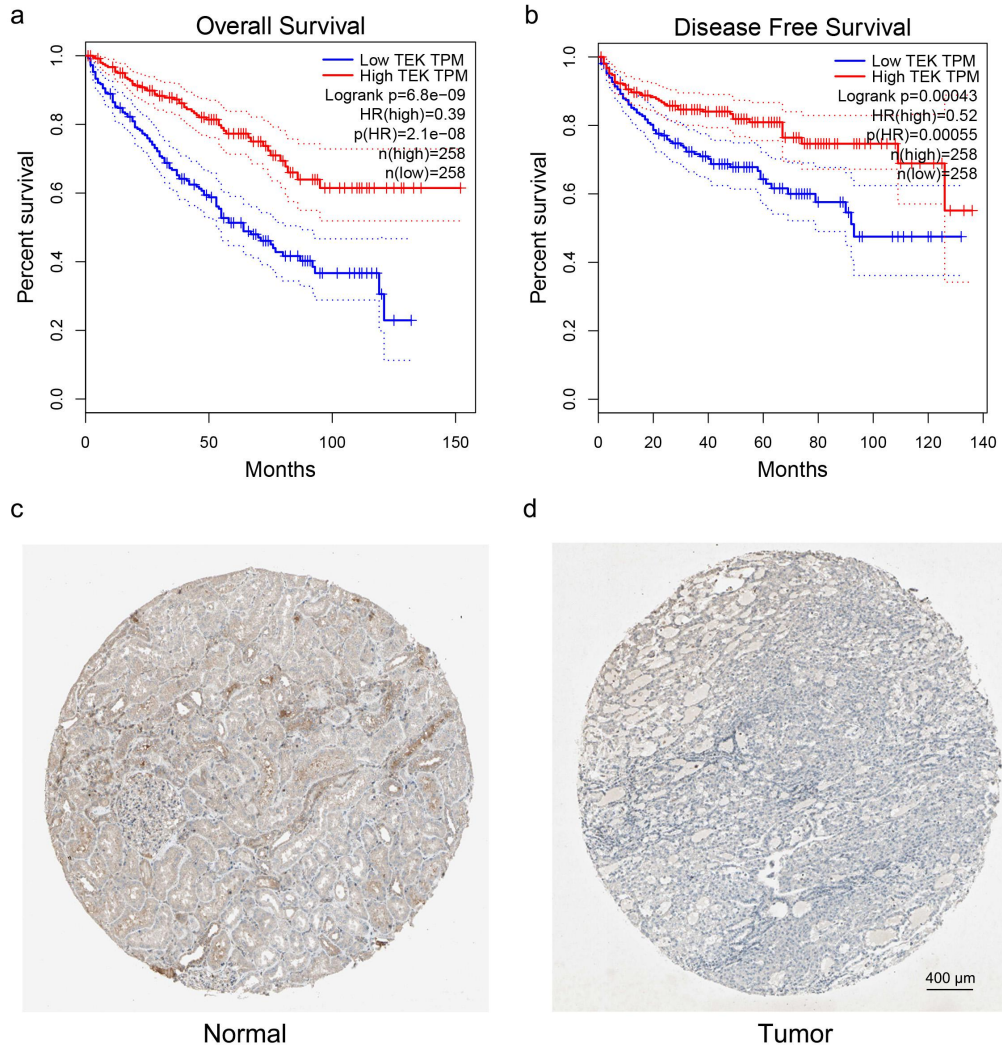

**Supplementary Figure 4. Expression and survival analysis of TEK. (a-b)** TEK's OS and DFS were displayed based on the GEPIA database. **(c-d)** According to the Human Protein Atlas database to analyze TEK protein level expression differences.

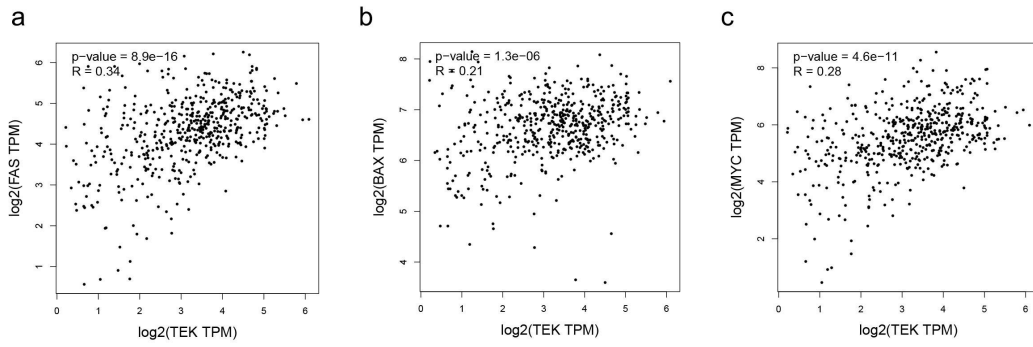

**Supplementary Figure 5. Verify the correlation between FAS, BAX and MYC expression levels and TEK expression levels (based on TCGA data in GEPIA). (a) FAS, (b) BAX, (c) MYC.**

Table S1. The differentially expressed genes(DEGs) were screened out in TCGA

| ID         | conMean     | treatMean   | logFC        | pValue      | FDR         |
|------------|-------------|-------------|--------------|-------------|-------------|
| GPR18      | 0.146794618 | 0.693482736 | 2.240060894  | 9.12E-25    | 4.88E-24    |
| FAM102A    | 20.81446349 | 9.545372492 | -1.124712969 | 7.37E-30    | 6.44E-29    |
| AL135999.3 | 1.545612011 | 0.458942028 | -1.751794378 | 9.49E-39    | 7.18E-37    |
| AC007216.3 | 0.062909036 | 0.293995291 | 2.22445388   | 1.83E-16    | 5.28E-16    |
| CA8        | 5.054649058 | 0.489813877 | -3.367305378 | 2.44E-38    | 1.61E-36    |
| AC073842.2 | 0.198957502 | 0.483187968 | 1.280124234  | 3.13E-08    | 5.39E-08    |
| SLC23A1    | 11.61591379 | 4.028049759 | -1.527949241 | 1.75E-05    | 2.53E-05    |
| RPL35      | 115.7821596 | 242.1192943 | 1.06430508   | 5.51E-26    | 3.27E-25    |
| CTSV       | 2.577228031 | 0.372850582 | -2.789150692 | 2.04E-28    | 1.52E-27    |
| LEF1       | 1.373004663 | 2.936015603 | 1.09652311   | 0.021097949 | 0.024538986 |
| AC064807.2 | 3.8841067   | 1.398757052 | -1.473437429 | 4.41E-23    | 2.05E-22    |
| GRM8       | 0.358724128 | 1.490924662 | 2.055260669  | 4.93E-13    | 1.14E-12    |
| AP000757.1 | 8.871118132 | 1.183177989 | -2.906448837 | 1.56E-36    | 5.28E-35    |
| IGHV4-28   | 0.940814095 | 5.01157033  | 2.41328115   | 0.000101513 | 0.000139507 |
| AC040977.1 | 2.882706806 | 8.47776831  | 1.556260429  | 5.30E-33    | 7.58E-32    |
| AL512770.1 | 0.086839521 | 0.374746255 | 2.109490393  | 1.06E-21    | 4.44E-21    |
| LINC01320  | 9.481668125 | 24.13059716 | 1.347650816  | 1.16E-18    | 3.87E-18    |
| SEMA3G     | 18.17338861 | 6.023849073 | -1.593069921 | 5.15E-30    | 4.60E-29    |
| AC010261.2 | 0.041846596 | 0.226296068 | 2.435029355  | 2.85E-15    | 7.62E-15    |
| AC008083.2 | 0.134397147 | 0.3550637   | 1.401575368  | 2.27E-13    | 5.38E-13    |
| AC007220.1 | 0.13348511  | 0.301095415 | 1.173541912  | 2.34E-07    | 3.81E-07    |
| AL353801.3 | 0.088063481 | 0.401032331 | 2.187102776  | 1.87E-14    | 4.72E-14    |
| PRG4       | 0.186333577 | 0.383416962 | 1.04102649   | 0.003667361 | 0.004522529 |
| AL022067.1 | 0.094362041 | 0.32477799  | 1.783175331  | 9.67E-12    | 2.07E-11    |
| MYO7A      | 1.176536643 | 2.421973827 | 1.041637021  | 4.43E-11    | 9.07E-11    |
| SNORA60    | 0.497408982 | 1.617834807 | 1.70155984   | 2.11E-09    | 3.91E-09    |
| TNNT2      | 2.292270072 | 0.085305232 | -4.747998989 | 1.11E-35    | 2.89E-34    |
| ORC6       | 0.205240259 | 0.525470379 | 1.356295691  | 4.73E-26    | 2.83E-25    |
| AC011472.1 | 0.705543357 | 2.137253438 | 1.598951347  | 2.40E-13    | 5.66E-13    |
| UGT1A10    | 0.066599692 | 0.467911281 | 2.812647612  | 0.001147985 | 0.001470461 |
| PHYHIP     | 1.118194497 | 0.32076167  | -1.80159749  | 7.08E-12    | 1.52E-11    |
| KRR1P1     | 0.096589537 | 0.338571169 | 1.809520301  | 7.47E-10    | 1.42E-09    |
| RNF150     | 8.595075058 | 0.989696965 | -3.118451479 | 2.26E-40    | 3.88E-38    |
| SIX4       | 0.910923261 | 0.186472412 | -2.288367316 | 1.89E-35    | 4.60E-34    |
| AP000866.4 | 3.290994344 | 1.496393156 | -1.137034275 | 2.30E-15    | 6.18E-15    |
| CENPK      | 0.182479053 | 0.703768503 | 1.947370079  | 6.52E-34    | 1.11E-32    |
| RARA       | 7.262338653 | 15.19483995 | 1.065075367  | 8.71E-27    | 5.52E-26    |
| AC106897.1 | 0.45086649  | 1.212784049 | 1.427550492  | 3.01E-19    | 1.05E-18    |
| AC008957.1 | 0.08807267  | 0.327478725 | 1.894634876  | 4.74E-17    | 1.42E-16    |
| RN7SL832P  | 0.713108685 | 0.248929532 | -1.518384579 | 2.11E-24    | 1.09E-23    |
| LMO7-AS1   | 3.659250473 | 0.681240102 | -2.425312901 | 3.78E-32    | 4.58E-31    |
| LMNTD2     | 0.595623692 | 2.444870214 | 2.037284837  | 2.80E-24    | 1.43E-23    |
| AC020659.1 | 0.187215248 | 0.775801102 | 2.050988882  | 1.11E-06    | 1.73E-06    |
| CDKN2B     | 1.077422874 | 3.489958453 | 1.695625263  | 1.72E-29    | 1.45E-28    |
| MIR621     | 16.3406876  | 7.713759003 | -1.082962713 | 4.29E-31    | 4.41E-30    |
| LUC7L      | 2.691615222 | 5.594674973 | 1.055582134  | 3.14E-12    | 6.92E-12    |
| PTMAP1     | 0.092679068 | 0.306989004 | 1.727871531  | 3.19E-09    | 5.85E-09    |
| RPL7AP50   | 0.435403506 | 0.949441225 | 1.124725668  | 3.15E-14    | 7.86E-14    |
| LINC01705  | 0.019412782 | 0.453374623 | 4.545624877  | 3.00E-14    | 7.49E-14    |
| KLHL31     | 0.098753783 | 0.327206487 | 1.72829343   | 1.09E-23    | 5.30E-23    |
| PTGER1     | 9.081212405 | 0.265394724 | -5.096673324 | 9.60E-41    | 2.16E-38    |
| JPH2       | 0.9676099   | 3.040657713 | 1.651885986  | 5.93E-20    | 2.18E-19    |
| AHNAK2     | 0.450615143 | 7.55171597  | 4.066836801  | 1.05E-36    | 3.80E-35    |
| FADS3      | 2.141894982 | 5.340856589 | 1.3181834    | 5.28E-29    | 4.19E-28    |
| DCN        | 37.8382284  | 6.456298469 | -2.551065363 | 3.60E-34    | 6.49E-33    |

Table S1. The differentially expressed genes(DEGs) were screened out in TCGA

| ID         | conMean     | treatMean   | logFC        | pValue      | FDR         |
|------------|-------------|-------------|--------------|-------------|-------------|
| AC005746.2 | 0.823585772 | 0.363347983 | -1.180567009 | 5.61E-23    | 2.59E-22    |
| MYO3A      | 0.144442468 | 1.491503332 | 3.368200321  | 4.63E-32    | 5.53E-31    |
| AC079210.1 | 0.08712425  | 0.269910272 | 1.631333641  | 0.000139362 | 0.000189874 |
| CYP17A1    | 13.60738757 | 3.803805891 | -1.838874584 | 2.61E-32    | 3.28E-31    |
| NEURL1B    | 4.733859569 | 10.52522799 | 1.15276267   | 1.57E-18    | 5.20E-18    |
| BGN        | 204.7638106 | 428.3880594 | 1.064957508  | 1.51E-11    | 3.19E-11    |
| AC008735.4 | 0.226317542 | 0.572765601 | 1.339596439  | 1.99E-14    | 5.01E-14    |
| RAB39A     | 0.209429234 | 0.591218648 | 1.497228933  | 3.94E-12    | 8.63E-12    |
| CDT1       | 0.380483511 | 1.822894458 | 2.260325197  | 1.37E-35    | 3.47E-34    |
| GCH1       | 8.123429958 | 3.89354356  | -1.061005239 | 4.83E-20    | 1.79E-19    |
| BPHL       | 10.42599381 | 3.653792286 | -1.512718382 | 1.49E-21    | 6.15E-21    |
| CLEC4F     | 0.122448114 | 0.366599785 | 1.582035392  | 4.19E-12    | 9.15E-12    |
| TREX2      | 0.333426857 | 1.252323939 | 1.909165572  | 1.69E-14    | 4.29E-14    |
| AC078778.1 | 0.178513947 | 0.607967354 | 1.767957065  | 4.71E-08    | 8.02E-08    |
| SOD3       | 50.24434181 | 17.101312   | -1.554854127 | 5.04E-32    | 6.00E-31    |
| CCDC188    | 0.138070449 | 0.473324341 | 1.777424537  | 2.68E-18    | 8.74E-18    |
| RN7SL23P   | 0.080234088 | 0.325616296 | 2.020885689  | 1.92E-11    | 4.03E-11    |
| NPIP14P    | 0.057734765 | 0.22349632  | 1.952738882  | 1.04E-16    | 3.05E-16    |
| STPG3      | 0.19322221  | 0.717862374 | 1.893446348  | 4.34E-07    | 6.95E-07    |
| GPT2       | 7.45080825  | 3.420571386 | -1.123159596 | 2.93E-18    | 9.51E-18    |
| THBS4      | 0.536691164 | 2.64445917  | 2.30080866   | 0.000172947 | 0.00023419  |
| DPYSL4     | 0.159381894 | 0.739621986 | 2.214300363  | 0.001906214 | 0.002399874 |
| CCDC102B   | 0.921465085 | 2.542422905 | 1.46420262   | 2.96E-26    | 1.80E-25    |
| TBX5       | 0.001234323 | 0.240517073 | 7.606275203  | 2.62E-18    | 8.53E-18    |
| AC243562.2 | 0.223181226 | 0.761618421 | 1.770852697  | 1.12E-07    | 1.86E-07    |
| CHL1-AS2   | 1.097583107 | 0.105749349 | -3.375609489 | 5.86E-47    | 5.24E-44    |
| AL353898.3 | 0.114663192 | 0.376761949 | 1.716250917  | 2.03E-13    | 4.82E-13    |
| CCNB2      | 0.573388583 | 1.901121406 | 1.729265581  | 1.54E-33    | 2.42E-32    |
| ARHGEF1    | 4.633667903 | 10.6500702  | 1.200636386  | 2.54E-31    | 2.70E-30    |
| TBC1D9     | 20.48664399 | 9.190858364 | -1.156412158 | 1.57E-32    | 2.06E-31    |
| FTH1P22    | 0.09501723  | 1.461906877 | 3.943518449  | 3.13E-32    | 3.86E-31    |
| HAO2       | 64.62680813 | 12.40163215 | -2.381602737 | 3.14E-10    | 6.10E-10    |
| NFKBID     | 0.603899051 | 2.798481684 | 2.212264994  | 4.46E-27    | 2.90E-26    |
| KIF4A      | 0.26490767  | 1.223594342 | 2.207563821  | 2.27E-34    | 4.22E-33    |
| TMEM116    | 4.406298417 | 1.873106019 | -1.234134646 | 9.00E-33    | 1.23E-31    |
| AC090286.1 | 0.142599533 | 0.346899331 | 1.282547797  | 5.22E-09    | 9.43E-09    |
| MAGI3      | 5.32290669  | 1.544040017 | -1.785504132 | 3.38E-37    | 1.47E-35    |
| RPS15AP24  | 0.121618251 | 0.382536158 | 1.653236378  | 5.75E-21    | 2.27E-20    |
| C1S        | 24.811175   | 60.26297901 | 1.280281933  | 5.43E-08    | 9.21E-08    |
| LRAT       | 0.136894504 | 0.655736692 | 2.2600521    | 1.50E-18    | 4.98E-18    |
| HRASLS2    | 5.213910625 | 1.324025005 | -1.977435484 | 6.31E-09    | 1.14E-08    |
| NR4A2      | 12.34924099 | 5.541268422 | -1.156134215 | 3.53E-08    | 6.07E-08    |
| MIR4639    | 0.154574097 | 0.42907156  | 1.472919701  | 1.59E-05    | 2.30E-05    |
| COX7A2P1   | 4.159563642 | 0.941825515 | -2.142900478 | 5.03E-27    | 3.26E-26    |
| TNFSF13B   | 1.005474456 | 5.701772058 | 2.503533935  | 1.57E-31    | 1.71E-30    |
| GACAT2     | 0.076221918 | 3.076454337 | 5.334918867  | 1.11E-31    | 1.24E-30    |
| LAT2       | 0.871756264 | 3.916974376 | 2.16774296   | 2.92E-35    | 6.78E-34    |
| CD22       | 0.342610763 | 0.811314312 | 1.243690464  | 2.79E-10    | 5.44E-10    |
| WASF3      | 5.221801861 | 1.784134941 | -1.549322981 | 4.05E-37    | 1.71E-35    |
| CD37       | 1.638342547 | 7.275088653 | 2.150727799  | 7.53E-33    | 1.04E-31    |
| TMC8       | 0.651497248 | 3.826700659 | 2.554270062  | 6.87E-35    | 1.46E-33    |
| TICRR      | 0.063202576 | 0.250010358 | 1.983932613  | 2.77E-32    | 3.44E-31    |
| SYNPO      | 21.81873318 | 48.08980586 | 1.140163762  | 6.88E-18    | 2.18E-17    |
| PIPOX      | 26.87580397 | 3.573386495 | -2.910944044 | 8.50E-10    | 1.61E-09    |
| ANG        | 5.349920968 | 17.26753471 | 1.690472639  | 1.47E-25    | 8.39E-25    |



Table S1. The differentially expressed genes(DEGs) were screened out in TCGA

| ID         | conMean     | treatMean   | logFC        | pValue   | FDR      |
|------------|-------------|-------------|--------------|----------|----------|
| AFAP1L1    | 3.461961028 | 9.932583723 | 1.520579565  | 5.97E-28 | 4.22E-27 |
| USP2       | 21.11981061 | 5.947915357 | -1.828140875 | 1.87E-27 | 1.26E-26 |
| TRAV16     | 0.12231083  | 0.661238388 | 2.43461833   | 4.26E-19 | 1.47E-18 |
| AC109479.1 | 0.089551533 | 0.243883665 | 1.445403091  | 1.37E-12 | 3.08E-12 |
| ANXA13     | 1.672101258 | 6.047417996 | 1.854657086  | 7.13E-10 | 1.36E-09 |
| LARGE2     | 8.575646321 | 3.275072544 | -1.388718544 | 8.19E-27 | 5.21E-26 |
| DLG2       | 0.523576555 | 0.233507482 | -1.164931718 | 2.88E-30 | 2.66E-29 |
| GJA4       | 13.88610468 | 37.81382938 | 1.445272005  | 2.50E-19 | 8.79E-19 |
| VN1R83P    | 0.628035346 | 1.387547249 | 1.143619239  | 3.11E-09 | 5.71E-09 |
| BMP8B      | 0.629849776 | 1.481873568 | 1.234342682  | 3.49E-09 | 6.39E-09 |
| SEPLG      | 3.126343449 | 13.11657302 | 2.068842653  | 9.32E-33 | 1.27E-31 |
| FN1        | 32.84256128 | 113.2576303 | 1.785969702  | 6.78E-22 | 2.88E-21 |
| ADGRG6     | 3.930049618 | 8.603998064 | 1.130459673  | 5.62E-10 | 1.08E-09 |
| KLHL17     | 0.807064456 | 1.776355957 | 1.138164903  | 6.01E-14 | 1.47E-13 |
| SPINK13    | 0.370466883 | 5.803573523 | 3.96952502   | 8.20E-25 | 4.40E-24 |
| LZTS3      | 14.71820363 | 2.958505495 | -2.31466112  | 1.26E-38 | 9.29E-37 |
| INSR       | 15.25112535 | 38.0406436  | 1.318625955  | 2.49E-25 | 1.39E-24 |
| AC011476.3 | 0.779179049 | 1.565386721 | 1.006492321  | 1.24E-05 | 1.81E-05 |
| AL022322.1 | 0.196393332 | 1.376384687 | 2.809065894  | 8.38E-24 | 4.12E-23 |
| PPARGC1A   | 14.43103276 | 4.334165749 | -1.735348319 | 4.60E-34 | 8.05E-33 |
| AC009542.2 | 0.119693804 | 1.622238799 | 3.760565827  | 5.63E-33 | 8.00E-32 |
| NPIPA1     | 0.169593602 | 0.57378574  | 1.758430366  | 6.12E-22 | 2.61E-21 |
| SYNJ2BP    | 16.61969164 | 7.141309614 | -1.218633041 | 8.85E-37 | 3.34E-35 |
| RNY1P9     | 0.067170243 | 0.401303212 | 2.578798562  | 9.36E-09 | 1.67E-08 |
| AC002044.2 | 0.040551311 | 0.233044502 | 2.522785021  | 6.27E-13 | 1.44E-12 |
| GPS2       | 0.650231104 | 1.854846437 | 1.512275276  | 9.15E-18 | 2.87E-17 |
| AL359510.2 | 0.083097031 | 0.241301546 | 1.53796833   | 6.73E-12 | 1.45E-11 |
| PDLIM1     | 27.92281167 | 87.90733683 | 1.654539359  | 1.24E-33 | 1.98E-32 |
| AC044840.1 | 0.034367148 | 0.36437406  | 3.40631824   | 4.00E-13 | 9.34E-13 |
| MIR4768    | 1.881322578 | 6.035138076 | 1.681639539  | 1.34E-05 | 1.95E-05 |
| AL049776.1 | 0.143580238 | 0.408791446 | 1.50950781   | 4.48E-18 | 1.44E-17 |
| KRT223P    | 0.33876326  | 9.315739501 | 4.781320975  | 2.18E-12 | 4.85E-12 |
| AC008957.3 | 0.017745285 | 0.259322862 | 3.869241773  | 4.83E-25 | 2.64E-24 |
| AC090589.1 | 0.219372157 | 0.815535509 | 1.894367269  | 5.51E-14 | 1.35E-13 |
| WHAMMP3    | 0.437482967 | 0.93055027  | 1.088857242  | 6.25E-23 | 2.87E-22 |
| STX1B      | 0.202938824 | 0.712610634 | 1.812069123  | 9.25E-22 | 3.89E-21 |
| AC087623.2 | 0.582914106 | 0.276770416 | -1.074593572 | 2.96E-20 | 1.11E-19 |
| GSAP       | 1.89271519  | 4.438525555 | 1.229623169  | 3.43E-27 | 2.25E-26 |
| AC003092.1 | 0.230722777 | 0.974585857 | 2.07862885   | 3.68E-10 | 7.12E-10 |
| NOTCH3     | 14.63377529 | 37.3008257  | 1.349905556  | 1.08E-18 | 3.62E-18 |
| DHRS11     | 3.530430692 | 1.295011505 | -1.446879279 | 2.83E-36 | 8.65E-35 |
| LAX1       | 0.220904992 | 0.937900384 | 2.086008679  | 2.19E-21 | 8.98E-21 |
| AL121748.2 | 0.133102725 | 0.309263845 | 1.21629808   | 3.14E-12 | 6.92E-12 |
| NEIL3      | 0.06360382  | 0.418741059 | 2.718873069  | 6.93E-35 | 1.47E-33 |
| KLRK1      | 0.029883865 | 0.326691405 | 3.450489826  | 7.38E-29 | 5.76E-28 |
| AC087468.1 | 0.115020676 | 2.031027506 | 4.142244648  | 2.54E-31 | 2.70E-30 |
| GTSE1      | 0.177278698 | 0.887581877 | 2.323861021  | 4.68E-34 | 8.17E-33 |
| EDARADD    | 0.740378775 | 0.360155858 | -1.039642168 | 3.43E-25 | 1.90E-24 |
| ADAMTS10   | 0.720304188 | 3.318377704 | 2.203799909  | 2.63E-27 | 1.75E-26 |
| SPHK1      | 0.60873218  | 1.930841201 | 1.665349977  | 6.24E-19 | 2.13E-18 |
| AC018755.4 | 0.460884291 | 1.392503397 | 1.595204346  | 5.28E-19 | 1.81E-18 |
| LINC02328  | 0.16953704  | 0.553991658 | 1.708263746  | 9.33E-25 | 4.98E-24 |
| DNMBP-AS1  | 0.726244099 | 0.244411314 | -1.571143465 | 6.75E-34 | 1.14E-32 |
| AC063961.1 | 0.194010069 | 0.652331733 | 1.749474278  | 6.14E-05 | 8.56E-05 |
| AC021683.1 | 0.163391647 | 0.428356817 | 1.390478822  | 7.82E-08 | 1.31E-07 |

Table S1. The differentially expressed genes(DEGs) were screened out in TCGA

| ID         | conMean     | treatMean   | logFC        | pValue      | FDR         |
|------------|-------------|-------------|--------------|-------------|-------------|
| ABCA12     | 0.177234322 | 0.977853194 | 2.463959876  | 2.47E-24    | 1.27E-23    |
| AC009159.1 | 0.021385306 | 0.273619902 | 3.677481417  | 1.31E-24    | 6.95E-24    |
| PLB1       | 0.253432466 | 0.639511942 | 1.335369947  | 1.04E-23    | 5.09E-23    |
| IGLC7      | 0.960335685 | 6.227441905 | 2.697028965  | 7.99E-06    | 1.18E-05    |
| TNFAIP2    | 8.306021236 | 20.42612479 | 1.298186059  | 4.89E-21    | 1.95E-20    |
| MEIS3P1    | 7.512314403 | 3.644207986 | -1.043652143 | 2.66E-24    | 1.36E-23    |
| IGKV4-1    | 22.3848872  | 97.57261536 | 2.123951251  | 4.39E-06    | 6.60E-06    |
| RN7SL233P  | 0.055133876 | 0.223204743 | 2.017356758  | 7.67E-06    | 1.14E-05    |
| FTH1P20    | 2.072454469 | 4.204934208 | 1.020742821  | 2.38E-19    | 8.37E-19    |
| AC079140.3 | 0.174973861 | 0.351058709 | 1.004572899  | 1.06E-06    | 1.67E-06    |
| FLI1       | 2.562854778 | 6.039956961 | 1.236786538  | 1.99E-25    | 1.12E-24    |
| AGAP2-AS1  | 1.581780747 | 5.362099825 | 1.761248438  | 4.16E-27    | 2.71E-26    |
| AC011377.1 | 0.162166561 | 0.356517921 | 1.136498231  | 0.000299069 | 0.000398553 |
| LINC02437  | 8.152251411 | 0.029143737 | -8.127868857 | 1.22E-50    | 1.68E-47    |
| AL078604.2 | 0.034753459 | 0.355462745 | 3.354469882  | 4.46E-29    | 3.57E-28    |
| MUT        | 27.66262458 | 13.38728595 | -1.047074535 | 1.02E-35    | 2.69E-34    |
| AC127070.4 | 0.060436082 | 0.244573509 | 2.016786108  | 7.07E-14    | 1.72E-13    |
| BCL6B      | 4.773137278 | 12.16503939 | 1.349731257  | 1.69E-18    | 5.59E-18    |
| GCNT4      | 3.427825563 | 1.129813953 | -1.601208471 | 1.28E-30    | 1.24E-29    |
| U47924.3   | 0.101494313 | 0.437019335 | 2.106298217  | 6.76E-17    | 2.00E-16    |
| ATP6V1B1   | 54.5326197  | 6.96854969  | -2.968189127 | 7.60E-36    | 2.07E-34    |
| Z99916.2   | 0.047990124 | 0.279260643 | 2.540802803  | 4.08E-19    | 1.41E-18    |
| AC004485.1 | 2.360905758 | 0.757422675 | -1.640169936 | 3.20E-08    | 5.50E-08    |
| JPH4       | 1.132185136 | 0.375809416 | -1.591036768 | 6.41E-35    | 1.37E-33    |
| AC012236.1 | 0.062926022 | 0.43360171  | 2.784641791  | 2.08E-18    | 6.84E-18    |
| AC108062.1 | 0.413451458 | 1.532030312 | 1.889654979  | 4.15E-24    | 2.09E-23    |
| AP000866.3 | 0.276587304 | 0.593024241 | 1.100356145  | 1.67E-06    | 2.57E-06    |
| TRBV5-4    | 0.135794445 | 0.662669958 | 2.286866049  | 6.29E-18    | 2.00E-17    |
| CYBA       | 17.38570603 | 40.70283459 | 1.227227613  | 3.87E-22    | 1.67E-21    |
| HIST1H2AG  | 0.205808301 | 0.707338037 | 1.781098669  | 4.09E-08    | 6.99E-08    |
| N4BP2L1    | 1.702255244 | 4.46146328  | 1.390069588  | 3.54E-34    | 6.39E-33    |
| CASP1      | 2.518213747 | 8.464012536 | 1.748941019  | 2.10E-33    | 3.21E-32    |
| DYSF       | 6.811971028 | 19.42914683 | 1.512078347  | 4.99E-28    | 3.55E-27    |
| NMU        | 0.1332798   | 0.995020698 | 2.9002684    | 1.86E-09    | 3.46E-09    |
| STK19B     | 0.474415655 | 1.743404859 | 1.877684113  | 2.54E-13    | 5.98E-13    |
| HOXA11     | 2.285468482 | 0.805869011 | -1.503872662 | 5.49E-27    | 3.54E-26    |
| RGS17      | 0.086348455 | 0.254016633 | 1.556680704  | 1.03E-09    | 1.94E-09    |
| GRPEL2-AS1 | 0.060939216 | 0.483846619 | 2.989106944  | 4.29E-25    | 2.35E-24    |
| AC004854.2 | 0.314321172 | 0.764529684 | 1.282333064  | 1.98E-22    | 8.74E-22    |
| AC116036.2 | 1.1691855   | 0.381791097 | -1.614648476 | 1.69E-32    | 2.21E-31    |
| AC103563.7 | 5.17369644  | 0.597977582 | -3.113032104 | 1.51E-36    | 5.13E-35    |
| LINC02391  | 0.32194975  | 0.653049696 | 1.020357253  | 2.72E-05    | 3.88E-05    |
| GAPDHP1    | 3.904729111 | 12.36488748 | 1.662954741  | 1.47E-06    | 2.28E-06    |
| AC010457.1 | 0.082443346 | 0.452768206 | 2.457297691  | 1.94E-15    | 5.24E-15    |
| AL031275.1 | 0.91051505  | 0.235134916 | -1.953194075 | 1.13E-22    | 5.10E-22    |
| AL162578.1 | 0.025335165 | 0.237294937 | 3.22746818   | 2.48E-06    | 3.79E-06    |
| TNFRSF11B  | 30.39567186 | 13.77588677 | -1.141720719 | 4.21E-21    | 1.69E-20    |
| CD300A     | 1.121980594 | 8.980388604 | 3.000730152  | 3.95E-38    | 2.43E-36    |
| APOD       | 10.8744237  | 3.910502721 | -1.475512954 | 8.00E-23    | 3.64E-22    |
| ITGB2-AS1  | 0.223036171 | 1.665270729 | 2.900407134  | 2.01E-29    | 1.67E-28    |
| AC233300.1 | 0.088627751 | 0.438261927 | 2.305962946  | 7.07E-20    | 2.59E-19    |
| AC020907.4 | 0.134377623 | 1.094545189 | 3.025966698  | 1.54E-25    | 8.78E-25    |
| TMEM245    | 27.69070431 | 13.24710836 | -1.063724273 | 1.09E-34    | 2.19E-33    |
| CLSPN      | 0.143628893 | 0.449519532 | 1.646037806  | 1.80E-28    | 1.35E-27    |
| LRRC25     | 1.648140349 | 8.083466858 | 2.294135071  | 2.61E-32    | 3.28E-31    |

Table S1. The differentially expressed genes(DEGs) were screened out in TCGA

| ID         | conMean     | treatMean   | logFC        | pValue      | FDR         |
|------------|-------------|-------------|--------------|-------------|-------------|
| AL031429.2 | 7.9942565   | 2.014980741 | -1.988197813 | 6.33E-30    | 5.60E-29    |
| HEPACAM2   | 11.08079207 | 5.284465014 | -1.068231682 | 7.08E-36    | 1.94E-34    |
| MYBL2      | 0.405437421 | 2.607001958 | 2.68484051   | 3.97E-34    | 7.08E-33    |
| SIRPB1     | 0.17449623  | 1.080339326 | 2.630216747  | 1.20E-29    | 1.03E-28    |
| CCL4L2     | 1.021498395 | 6.129015295 | 2.584968368  | 9.51E-22    | 3.99E-21    |
| RNVU1-19   | 0.05218902  | 0.220210977 | 2.077068167  | 1.17E-05    | 1.71E-05    |
| SH3GL3     | 2.022772624 | 0.039532294 | -5.677158668 | 2.90E-27    | 1.92E-26    |
| LRRC41     | 9.500479556 | 20.7531276  | 1.127256531  | 1.44E-17    | 4.48E-17    |
| B4GALNT3   | 5.299483011 | 1.053523503 | -2.330629125 | 1.37E-36    | 4.74E-35    |
| AC091390.3 | 0.351979311 | 1.401581811 | 1.993493422  | 8.23E-22    | 3.48E-21    |
| SNORD1B    | 0.077854961 | 0.294573933 | 1.919768892  | 4.47E-07    | 7.16E-07    |
| AC093157.2 | 0.112826197 | 0.231611561 | 1.037605179  | 3.34E-12    | 7.34E-12    |
| AC022509.1 | 0.049703376 | 1.30890708  | 4.718875024  | 6.21E-33    | 8.73E-32    |
| SORCS2     | 7.197522139 | 2.810207982 | -1.356823414 | 7.76E-20    | 2.83E-19    |
| AC025430.1 | 0.08078156  | 0.238864647 | 1.564095425  | 2.87E-09    | 5.28E-09    |
| TEPSIN     | 0.953810742 | 2.144401887 | 1.168800374  | 1.28E-22    | 5.75E-22    |
| FOXP3      | 0.366837174 | 1.168878911 | 1.671913732  | 5.20E-13    | 1.20E-12    |
| NCCRP1     | 1.738726015 | 0.225455437 | -2.947116404 | 2.07E-32    | 2.65E-31    |
| NCOA7      | 21.43788489 | 9.915912845 | -1.112345077 | 3.64E-24    | 1.85E-23    |
| GFII       | 0.164254187 | 0.947006789 | 2.527444623  | 1.98E-30    | 1.86E-29    |
| HLA-F-AS1  | 0.33338156  | 1.13960865  | 1.773292265  | 2.12E-39    | 2.22E-37    |
| IGSF6      | 0.972910704 | 6.311128988 | 2.697518807  | 5.94E-37    | 2.35E-35    |
| AL158151.4 | 0.035789896 | 0.307705279 | 3.10392494   | 1.48E-20    | 5.67E-20    |
| AC090971.3 | 0.083883455 | 0.311712105 | 1.893756     | 3.46E-20    | 1.29E-19    |
| NCAPG      | 0.215689766 | 0.934882554 | 2.115827412  | 1.97E-34    | 3.74E-33    |
| HLA-DPA1   | 33.19723619 | 121.3011518 | 1.869458208  | 1.23E-27    | 8.40E-27    |
| AC116348.1 | 0.115886668 | 0.497746367 | 2.102696185  | 0.001806322 | 0.002278711 |
| MTND4P20   | 0.08228534  | 0.300272388 | 1.867564484  | 0.012269856 | 0.014527103 |
| TOX3       | 6.512128418 | 1.443172972 | -2.173884925 | 2.21E-34    | 4.14E-33    |
| SNORD51    | 0.066855486 | 0.414425902 | 2.63199632   | 6.87E-11    | 1.39E-10    |
| AC016957.2 | 0.274332098 | 0.887658692 | 1.694081629  | 9.53E-29    | 7.36E-28    |
| TRBV23-1   | 0.018425888 | 0.311711993 | 4.080407585  | 3.26E-16    | 9.24E-16    |
| PCED1B     | 1.170480503 | 3.836522289 | 1.712698234  | 5.08E-32    | 6.04E-31    |
| AL355802.1 | 0.239009587 | 0.628675811 | 1.395247765  | 1.59E-29    | 1.34E-28    |
| AC108749.1 | 1.098309368 | 0.105363746 | -3.381834034 | 2.39E-16    | 6.84E-16    |
| GZMA       | 2.447645085 | 21.84271956 | 3.157686208  | 1.27E-34    | 2.53E-33    |
| MISP3      | 8.414979389 | 2.579467593 | -1.705886417 | 1.23E-32    | 1.65E-31    |
| CATSPERG   | 0.168024106 | 0.528706904 | 1.653799934  | 2.81E-15    | 7.51E-15    |
| MYL4       | 0.171086951 | 0.51073126  | 1.577834637  | 7.56E-29    | 5.89E-28    |
| CLIC3      | 0.534747398 | 1.644326152 | 1.620567022  | 8.36E-16    | 2.31E-15    |
| CLEC7A     | 0.744322863 | 3.934988063 | 2.402358804  | 2.90E-31    | 3.06E-30    |
| MICAL1     | 2.304040715 | 6.496947219 | 1.495595773  | 1.13E-31    | 1.26E-30    |
| CD28       | 0.401188881 | 1.092552612 | 1.445349226  | 1.22E-16    | 3.56E-16    |
| TDGF1      | 4.941875346 | 0.500182846 | -3.304531135 | 2.11E-36    | 6.72E-35    |
| LINC01983  | 2.205005878 | 0.035134937 | -5.971732362 | 1.14E-53    | 2.14E-50    |
| AC011352.3 | 0.093314493 | 3.739439559 | 5.32457709   | 5.36E-32    | 6.35E-31    |
| AC090181.3 | 0.077182312 | 0.285442722 | 1.886859119  | 1.28E-10    | 2.55E-10    |
| SBK1       | 1.449117403 | 0.531116101 | -1.448075311 | 7.00E-31    | 6.99E-30    |
| MS4A6A     | 3.065113829 | 14.92628491 | 2.283842572  | 3.62E-32    | 4.41E-31    |
| SPSB1      | 5.927885083 | 14.26971733 | 1.267367372  | 1.50E-15    | 4.08E-15    |
| AC009119.1 | 0.103826994 | 0.343635301 | 1.726696674  | 8.64E-28    | 5.98E-27    |
| SLC2A1     | 16.14210251 | 63.5368224  | 1.976764438  | 6.96E-30    | 6.12E-29    |
| TRAV12-3   | 0.169048066 | 1.006449563 | 2.573769456  | 3.13E-19    | 1.09E-18    |
| RACK1      | 119.6126604 | 273.8791294 | 1.195169232  | 1.90E-35    | 4.63E-34    |
| CHKB       | 0.561143344 | 1.851868177 | 1.722540145  | 7.36E-20    | 2.69E-19    |

Table S1. The differentially expressed genes(DEGs) were screened out in TCGA

| ID         | conMean     | treatMean   | logFC        | pValue      | FDR         |
|------------|-------------|-------------|--------------|-------------|-------------|
| LYPD6B     | 3.542795703 | 0.472465929 | -2.906606074 | 9.34E-37    | 3.47E-35    |
| AC021078.1 | 0.830892818 | 2.949858335 | 1.82791138   | 9.41E-28    | 6.50E-27    |
| PROSER2    | 6.066920778 | 2.732986472 | -1.150486154 | 1.60E-16    | 4.64E-16    |
| AC015819.2 | 0.090652528 | 0.645324545 | 2.831605749  | 8.37E-26    | 4.90E-25    |
| HPDL       | 0.383607927 | 0.188960728 | -1.021546102 | 1.89E-14    | 4.77E-14    |
| RPS5P2     | 0.10990824  | 0.27792809  | 1.338412108  | 0.003013141 | 0.003737471 |
| CDC25C     | 0.070735089 | 0.448310259 | 2.663999554  | 2.16E-34    | 4.07E-33    |
| MYO9B      | 4.1783465   | 9.482977543 | 1.182407983  | 4.86E-33    | 7.00E-32    |
| IGFALS     | 0.57918144  | 0.182622971 | -1.665147129 | 2.33E-20    | 8.81E-20    |
| TOP2A      | 1.030254579 | 3.844895731 | 1.899943598  | 2.30E-32    | 2.92E-31    |
| AC034105.1 | 0.069168885 | 0.389465566 | 2.493300669  | 0.001563501 | 0.00198308  |
| PFN1P1     | 0.37696868  | 0.853329206 | 1.178657763  | 3.47E-11    | 7.16E-11    |
| AC009542.1 | 0.158357276 | 0.334794708 | 1.080093569  | 2.71E-06    | 4.13E-06    |
| SNORD36C   | 0.117936847 | 0.392459438 | 1.734529021  | 1.14E-07    | 1.90E-07    |
| E2F7       | 0.079399376 | 0.336965231 | 2.085400157  | 1.85E-30    | 1.75E-29    |
| AC079209.1 | 0.030613193 | 0.228008878 | 2.896864578  | 7.99E-29    | 6.21E-28    |
| CTSW       | 1.093540138 | 9.081308296 | 3.05389398   | 2.93E-33    | 4.37E-32    |
| XRCC2      | 0.140246306 | 0.435195803 | 1.633701871  | 6.26E-30    | 5.53E-29    |
| CCDC8      | 13.25770105 | 5.341038502 | -1.311638437 | 2.80E-18    | 9.11E-18    |
| PCYT2      | 9.196652833 | 3.660777587 | -1.328958756 | 1.14E-30    | 1.11E-29    |
| ABCC3      | 4.103354433 | 20.70616958 | 2.335185015  | 1.10E-31    | 1.23E-30    |
| ACAT1      | 65.91870276 | 28.64223753 | -1.202543651 | 4.68E-28    | 3.34E-27    |
| AL356801.1 | 0.261990644 | 0.731487089 | 1.481317106  | 2.43E-08    | 4.21E-08    |
| INHBA-AS1  | 0.031580925 | 0.246114993 | 2.962207218  | 8.31E-15    | 2.15E-14    |
| PML        | 4.127491986 | 9.57467159  | 1.21395759   | 3.33E-36    | 9.89E-35    |
| EMILIN2    | 1.160915785 | 3.687760389 | 1.6674816    | 2.18E-30    | 2.04E-29    |
| TYMS       | 2.853996469 | 12.37620179 | 2.11651317   | 1.43E-36    | 4.93E-35    |
| RNU6-322P  | 0.742568339 | 1.622344107 | 1.127484146  | 3.08E-06    | 4.67E-06    |
| OAT        | 33.61081736 | 14.82165811 | -1.181218775 | 1.11E-36    | 3.97E-35    |
| PRRT3-AS1  | 0.35529605  | 0.745503494 | 1.069193465  | 3.26E-09    | 5.97E-09    |
| FFAR2      | 0.07535404  | 0.264411352 | 1.81102734   | 1.24E-20    | 4.80E-20    |
| H1FX-AS1   | 0.215542041 | 0.468042793 | 1.118671152  | 3.54E-09    | 6.47E-09    |
| ZNF354B    | 1.303508158 | 2.910415271 | 1.158825406  | 3.49E-23    | 1.63E-22    |
| MT-TL1     | 8.945711522 | 4.30451976  | -1.055343945 | 1.48E-13    | 3.53E-13    |
| ERMP1      | 45.6789176  | 8.080264609 | -2.499054022 | 1.13E-39    | 1.36E-37    |
| UPP1       | 4.363011333 | 8.786879672 | 1.010026717  | 1.52E-15    | 4.15E-15    |
| CD99       | 22.64103736 | 54.36078267 | 1.263626167  | 6.39E-31    | 6.42E-30    |
| LINC00887  | 0.253411989 | 10.45881041 | 5.367090177  | 4.62E-35    | 1.03E-33    |
| PSPC1-AS2  | 0.382395338 | 0.839438346 | 1.134359432  | 1.44E-10    | 2.87E-10    |
| IL13RA2    | 2.898230885 | 1.347450712 | -1.104940028 | 2.07E-08    | 3.61E-08    |
| LTB4R2     | 0.168818613 | 0.802658086 | 2.249311586  | 9.46E-34    | 1.56E-32    |
| RF00409    | 0.052169991 | 0.338122772 | 2.696255105  | 2.84E-21    | 1.15E-20    |
| DOC2B      | 5.248147289 | 2.168867865 | -1.274866048 | 1.16E-20    | 4.48E-20    |
| AL391422.1 | 0.368929315 | 0.782583958 | 1.084901108  | 2.86E-14    | 7.15E-14    |
| DUSP9      | 46.69976037 | 0.385074571 | -6.922133483 | 1.23E-42    | 6.05E-40    |
| ASS1P1     | 1.133058591 | 0.523692861 | -1.113429623 | 0.006889265 | 0.008323231 |
| AC098613.1 | 0.255871983 | 1.128615107 | 2.141059473  | 9.83E-30    | 8.48E-29    |
| GIMAP2     | 3.195176779 | 7.97355115  | 1.319326642  | 2.02E-25    | 1.14E-24    |
| NPHS1      | 13.98247244 | 0.237648489 | -5.878646447 | 9.17E-16    | 2.53E-15    |
| TRBV4-2    | 0.117070998 | 1.417207799 | 3.59759569   | 1.48E-21    | 6.13E-21    |
| AC011510.1 | 0.049217096 | 0.413731336 | 3.071462784  | 8.77E-21    | 3.42E-20    |
| AC007216.1 | 0.049884767 | 0.431083861 | 3.111297319  | 8.27E-14    | 2.01E-13    |
| AC025569.1 | 0.140288037 | 0.340466168 | 1.279119455  | 3.62E-08    | 6.21E-08    |
| LINC02417  | 1.58550095  | 0.1245831   | -3.66975846  | 3.51E-32    | 4.28E-31    |
| CAMK2N2    | 0.102393013 | 0.374546558 | 1.871027793  | 2.18E-14    | 5.49E-14    |

Table S1. The differentially expressed genes(DEGs) were screened out in TCGA

| ID         | conMean     | treatMean   | logFC        | pValue      | FDR         |
|------------|-------------|-------------|--------------|-------------|-------------|
| AP001429.1 | 0.076358203 | 0.270341492 | 1.823927897  | 1.73E-06    | 2.67E-06    |
| SCNN1B     | 28.31457642 | 1.66903298  | -4.08446058  | 5.36E-40    | 7.56E-38    |
| AF117829.1 | 0.30925959  | 0.721053528 | 1.221288028  | 1.23E-18    | 4.12E-18    |
| PFKFB2     | 8.036807147 | 2.444758198 | -1.716930683 | 9.19E-35    | 1.88E-33    |
| TAS2R19    | 0.077389849 | 0.258648084 | 1.740774264  | 3.12E-14    | 7.78E-14    |
| GSDMB      | 0.363560933 | 1.345897775 | 1.888299752  | 6.04E-18    | 1.92E-17    |
| AC093797.1 | 0.130756709 | 0.436611166 | 1.739464049  | 2.20E-17    | 6.76E-17    |
| AC003989.1 | 0.015323724 | 0.250205775 | 4.029276196  | 0.006249043 | 0.007569294 |
| TCEA1P4    | 0.106796302 | 0.216720066 | 1.020971053  | 3.91E-09    | 7.12E-09    |
| AL138963.1 | 0.075702177 | 0.403033081 | 2.412491563  | 6.52E-09    | 1.17E-08    |
| RPS15AP10  | 0.225288538 | 0.587611311 | 1.38308825   | 7.20E-11    | 1.45E-10    |
| LINGO1     | 1.026240961 | 4.062510184 | 1.985001915  | 2.05E-26    | 1.26E-25    |
| PIF1       | 0.066551359 | 0.327408946 | 2.298553708  | 1.86E-31    | 2.02E-30    |
| AC007405.3 | 4.075373236 | 1.980841337 | -1.040818865 | 2.07E-20    | 7.86E-20    |
| SNORA73B   | 0.64666156  | 98.86331895 | 7.256280675  | 1.77E-16    | 5.10E-16    |
| MYORG      | 9.071014431 | 3.200948652 | -1.502764365 | 2.64E-36    | 8.13E-35    |
| KCCAT333   | 1.232244084 | 23.47148678 | 4.251549272  | 1.15E-15    | 3.17E-15    |
| CYP4F60P   | 0.073044896 | 0.728426155 | 3.317927346  | 9.19E-16    | 2.53E-15    |
| YEATS2     | 2.785090514 | 6.017884044 | 1.111532093  | 7.86E-31    | 7.80E-30    |
| CPVL       | 61.52470986 | 23.30797139 | -1.400342504 | 1.44E-25    | 8.27E-25    |
| ZNF726     | 0.485492023 | 0.179742871 | -1.433513038 | 3.85E-31    | 3.98E-30    |
| IGKV2D-30  | 0.068049783 | 0.267724693 | 1.976087753  | 0.008832521 | 0.010584014 |
| IGKV1D-42  | 0.118195626 | 0.339532339 | 1.522372348  | 0.024474073 | 0.028328116 |
| AP000317.1 | 0.587630886 | 0.268794843 | -1.12840477  | 7.97E-12    | 1.71E-11    |
| C16orf74   | 0.501583044 | 3.99209426  | 2.9925853    | 6.07E-23    | 2.80E-22    |
| PCSK1N     | 22.2394353  | 7.159968765 | -1.635094957 | 3.86E-26    | 2.32E-25    |
| GPAT2      | 0.169482984 | 0.443956494 | 1.389277875  | 5.72E-16    | 1.60E-15    |
| QRFPR      | 0.877919125 | 6.781851231 | 2.949519189  | 1.48E-25    | 8.45E-25    |
| AC145285.3 | 0.064640032 | 0.262411413 | 2.021330652  | 3.06E-12    | 6.76E-12    |
| WNT2B      | 0.377446475 | 0.95375364  | 1.337344587  | 7.32E-06    | 1.09E-05    |
| SNORA7B    | 0.092811257 | 2.937469443 | 4.984130233  | 9.67E-10    | 1.83E-09    |
| AC018695.4 | 0.120264572 | 0.430601555 | 1.840141825  | 4.80E-16    | 1.35E-15    |
| RF00003    | 0.060821144 | 0.254693346 | 2.066116407  | 6.56E-08    | 1.11E-07    |
| TMEM200B   | 2.387168067 | 5.559907593 | 1.219760764  | 3.64E-20    | 1.36E-19    |
| RBP2       | 2.037824387 | 0.139397015 | -3.869758154 | 4.08E-36    | 1.18E-34    |
| AL133230.1 | 0.080193864 | 0.317512581 | 1.985250003  | 2.12E-13    | 5.03E-13    |
| PDCD1LG2   | 1.039202081 | 2.282631426 | 1.135221704  | 7.34E-14    | 1.79E-13    |
| AC138305.1 | 0.88356457  | 0.330300651 | -1.419555757 | 9.71E-32    | 1.10E-30    |
| PBX4       | 0.347426898 | 0.965349606 | 1.474342065  | 1.25E-14    | 3.20E-14    |
| ITGAL      | 1.221017113 | 7.198869878 | 2.559687022  | 1.35E-33    | 2.13E-32    |
| ALG1L13P   | 0.11590607  | 0.234528635 | 1.016807962  | 2.38E-07    | 3.89E-07    |
| MLC1       | 0.053651164 | 0.253570775 | 2.240707108  | 2.41E-30    | 2.24E-29    |
| SH3BP2     | 4.034804486 | 13.43978336 | 1.735939211  | 1.37E-34    | 2.68E-33    |
| GCAT       | 8.686227681 | 4.068903248 | -1.094089793 | 3.77E-23    | 1.76E-22    |
| SCIMP      | 0.48444316  | 1.939949194 | 2.001619561  | 3.13E-28    | 2.28E-27    |
| HPCAL4     | 2.760841413 | 0.177628789 | -3.958170691 | 1.71E-27    | 1.16E-26    |
| GRK5       | 1.765715779 | 4.299069073 | 1.283771154  | 7.85E-26    | 4.60E-25    |
| AC074029.3 | 0.117005294 | 0.340218397 | 1.539887355  | 3.21E-11    | 6.63E-11    |
| LINC01738  | 0.100749715 | 1.516500645 | 3.911898453  | 6.73E-30    | 5.93E-29    |
| TRAV2      | 0.119579648 | 0.705460227 | 2.56059288   | 1.16E-19    | 4.18E-19    |
| KLKB1      | 0.646815801 | 1.766200451 | 1.449222259  | 3.31E-08    | 5.70E-08    |
| GALNT6     | 2.51012825  | 1.092048044 | -1.200724749 | 5.95E-15    | 1.55E-14    |
| SNORD67    | 0.074217632 | 0.491783777 | 2.72819026   | 0.001260938 | 0.001611033 |
| LILRB5     | 0.319792113 | 1.086771141 | 1.764841898  | 2.09E-17    | 6.41E-17    |
| FREM2      | 5.036462653 | 1.644065175 | -1.615143323 | 4.60E-34    | 8.05E-33    |

Table S1. The differentially expressed genes(DEGs) were screened out in TCGA

| ID         | conMean     | treatMean   | logFC        | pValue      | FDR         |
|------------|-------------|-------------|--------------|-------------|-------------|
| AF124730.1 | 0.101309308 | 0.270407731 | 1.416369662  | 5.73E-07    | 9.12E-07    |
| NKD2       | 0.927640203 | 3.286598973 | 1.824958179  | 0.00044277  | 0.000582736 |
| PLA2G5     | 0.049894417 | 0.344077579 | 2.785783578  | 4.29E-26    | 2.57E-25    |
| PDHA1      | 38.48976486 | 17.02476874 | -1.176839657 | 1.81E-35    | 4.42E-34    |
| AC010319.4 | 0.211860238 | 0.424270523 | 1.001871603  | 1.54E-09    | 2.88E-09    |
| MAPK10     | 3.527225085 | 1.70749035  | -1.046656217 | 5.05E-35    | 1.11E-33    |
| COL4A2     | 50.27486917 | 145.4251536 | 1.532367501  | 4.56E-26    | 2.73E-25    |
| FP671120.1 | 0.119648011 | 0.275717745 | 1.204395712  | 4.63E-21    | 1.85E-20    |
| TSPYL2     | 4.138505625 | 9.413518347 | 1.18562412   | 9.86E-18    | 3.09E-17    |
| IGLV9-49   | 0.825740822 | 24.64058859 | 4.899203879  | 1.07E-06    | 1.67E-06    |
| DSP        | 27.98280819 | 10.3091232  | -1.440619115 | 6.60E-32    | 7.71E-31    |
| SEMA4A     | 9.113818778 | 3.051167014 | -1.578694532 | 9.06E-22    | 3.81E-21    |
| AL034550.1 | 0.134330037 | 0.34148936  | 1.346058696  | 2.62E-10    | 5.12E-10    |
| RPL23AP64  | 0.478601727 | 1.823033579 | 1.929443628  | 6.70E-16    | 1.86E-15    |
| AC011005.4 | 0.15805598  | 0.438513535 | 1.472185748  | 1.38E-07    | 2.28E-07    |
| GRHL2      | 4.631645056 | 0.333207364 | -3.797032505 | 1.05E-36    | 3.80E-35    |
| HMGCR      | 11.052227   | 5.441092878 | -1.022368739 | 4.56E-34    | 8.00E-33    |
| SH2D3C     | 4.957674847 | 10.73453102 | 1.114523603  | 1.65E-19    | 5.89E-19    |
| GLYCTK     | 7.931479182 | 3.875845214 | -1.03307899  | 4.81E-06    | 7.21E-06    |
| AC022400.5 | 0.224676664 | 0.581952087 | 1.373050091  | 2.67E-16    | 7.60E-16    |
| A4GNT      | 0.213508376 | 0.582024418 | 1.446787012  | 1.19E-07    | 1.98E-07    |
| TMSB4XP4   | 0.536806257 | 1.19988467  | 1.160422353  | 4.99E-14    | 1.23E-13    |
| AC090286.3 | 0.526459611 | 2.305750411 | 2.130841596  | 5.14E-11    | 1.05E-10    |
| FA2H       | 3.169834805 | 0.86258338  | -1.877671832 | 3.63E-31    | 3.77E-30    |
| AL133415.1 | 0.133377109 | 0.84456853  | 2.662703405  | 1.12E-34    | 2.24E-33    |
| SNHG1      | 2.656819181 | 8.303979614 | 1.644102859  | 1.93E-31    | 2.09E-30    |
| GATM       | 209.6253164 | 49.7876089  | -2.073954326 | 4.09E-08    | 6.99E-08    |
| TMEM156    | 0.307700508 | 0.855053315 | 1.474487554  | 9.57E-20    | 3.47E-19    |
| NUSAP1     | 1.626359465 | 7.233556383 | 2.15305896   | 1.33E-34    | 2.62E-33    |
| RPL9P29    | 0.446995    | 1.052377665 | 1.235321936  | 6.84E-11    | 1.38E-10    |
| CDH23      | 0.107752377 | 0.573128409 | 2.411138717  | 3.21E-25    | 1.78E-24    |
| AC005326.1 | 0.034659342 | 0.353092764 | 3.3487311    | 2.66E-10    | 5.20E-10    |
| AL354877.1 | 0.125743814 | 0.259824393 | 1.047049454  | 0.000253829 | 0.000340024 |
| TRAV26-1   | 0.078861069 | 0.468924188 | 2.571969524  | 7.88E-21    | 3.08E-20    |
| CREG2      | 0.122122549 | 0.482505367 | 1.982215384  | 7.57E-15    | 1.96E-14    |
| FAM111B    | 0.264237417 | 1.205421254 | 2.189630731  | 4.76E-34    | 8.30E-33    |
| C3AR1      | 3.346978871 | 12.57674676 | 1.909827438  | 5.02E-28    | 3.58E-27    |
| AP000355.1 | 0.439309797 | 1.590784216 | 1.856427574  | 1.11E-12    | 2.51E-12    |
| AL021328.1 | 0.173607002 | 2.369806387 | 3.770872154  | 3.07E-30    | 2.83E-29    |
| ANK2       | 17.19651207 | 4.063837527 | -2.081201347 | 6.86E-34    | 1.16E-32    |
| RTEL1-TNFR | 0.077287971 | 0.443098514 | 2.519311685  | 1.95E-29    | 1.62E-28    |
| C1QA       | 30.67384269 | 188.6313927 | 2.620488976  | 8.09E-34    | 1.35E-32    |
| RPS19P1    | 0.150901162 | 0.36846091  | 1.287907653  | 2.43E-11    | 5.05E-11    |
| AC007566.1 | 0.641806218 | 2.09545086  | 1.707051018  | 6.93E-18    | 2.19E-17    |
| RNU6-658P  | 0.220777793 | 0.5537892   | 1.326741854  | 3.06E-07    | 4.95E-07    |
| AL590004.3 | 0.045680603 | 0.341215207 | 2.901028337  | 1.32E-17    | 4.09E-17    |
| AC131953.1 | 0.131731295 | 0.341431349 | 1.373997408  | 9.15E-09    | 1.63E-08    |
| FER1L4     | 0.059214027 | 2.789463836 | 5.557905057  | 3.06E-39    | 2.92E-37    |
| CSPG4      | 2.881595844 | 19.60701756 | 2.766430192  | 1.87E-33    | 2.90E-32    |
| COLCA1     | 3.252070764 | 1.055254527 | -1.623767633 | 7.27E-28    | 5.08E-27    |
| LCP2       | 1.60631535  | 7.624742511 | 2.246933469  | 1.79E-36    | 5.86E-35    |
| MIR23A     | 0.988055201 | 2.224557499 | 1.170854838  | 0.030131311 | 0.034584569 |
| AC032044.2 | 0.116953042 | 0.55098703  | 2.236088977  | 2.69E-10    | 5.25E-10    |
| CLEC14A    | 15.4126056  | 39.53430939 | 1.358994444  | 3.04E-18    | 9.86E-18    |
| DEGS2      | 6.733143993 | 0.794410569 | -3.083323596 | 9.17E-30    | 7.93E-29    |

Table S1. The differentially expressed genes(DEGs) were screened out in TCGA

| ID          | conMean     | treatMean   | logFC        | pValue      | FDR         |
|-------------|-------------|-------------|--------------|-------------|-------------|
| LYPLAL1-DT1 | 1.191361415 | 0.230203997 | -2.371626348 | 7.24E-37    | 2.78E-35    |
| MT1G        | 532.7081502 | 24.31696708 | -4.453310148 | 1.42E-28    | 1.08E-27    |
| AC091965.4  | 0.81290199  | 0.180198654 | -2.173493186 | 1.07E-34    | 2.16E-33    |
| HLA-S       | 0.509047074 | 1.30855167  | 1.362099913  | 9.16E-11    | 1.84E-10    |
| AGR2        | 4.524751441 | 0.944386749 | -2.260388838 | 7.35E-35    | 1.55E-33    |
| AC108704.1  | 0.200310682 | 0.912947227 | 2.188292107  | 6.19E-29    | 4.88E-28    |
| FAM198A     | 0.60730271  | 0.220096368 | -1.464280465 | 5.36E-29    | 4.26E-28    |
| AL009178.2  | 0.554802881 | 0.242690748 | -1.192856171 | 1.81E-25    | 1.03E-24    |
| MAP3K15     | 1.456948697 | 0.199355109 | -2.86953759  | 1.01E-37    | 5.30E-36    |
| ALG1L       | 0.796861857 | 0.367117573 | -1.118087469 | 5.30E-16    | 1.48E-15    |
| BMPR1B      | 6.925853413 | 1.525887457 | -2.182343294 | 1.89E-36    | 6.15E-35    |
| C9orf50     | 0.218483385 | 0.457371744 | 1.065843666  | 0.000190408 | 0.000257051 |
| MOB1B       | 13.82833544 | 6.623388718 | -1.06198607  | 1.81E-33    | 2.81E-32    |
| TRAV12-2    | 0.218301273 | 1.35452236  | 2.633391757  | 5.45E-19    | 1.86E-18    |
| AC002128.2  | 0.123364493 | 0.30365243  | 1.299493695  | 8.21E-06    | 1.21E-05    |
| RNU7-75P    | 0.103852439 | 0.697939929 | 2.748567773  | 8.52E-11    | 1.72E-10    |
| SLC7A13     | 7.676463792 | 0.273152616 | -4.812662735 | 6.87E-33    | 9.58E-32    |
| RNU7-49P    | 0.559304349 | 2.073553924 | 1.890400113  | 3.80E-14    | 9.43E-14    |
| RNU1-14P    | 2.082746217 | 11.01866014 | 2.403389841  | 6.93E-16    | 1.93E-15    |
| CD109       | 4.704063008 | 10.09567106 | 1.10175752   | 2.99E-14    | 7.46E-14    |
| TNFAIP6     | 0.569658114 | 35.32574177 | 5.954479713  | 5.81E-38    | 3.37E-36    |
| DNAH11      | 0.108037348 | 2.824726231 | 4.708509015  | 4.60E-29    | 3.68E-28    |
| DOK1        | 2.091258869 | 4.974958104 | 1.250312717  | 8.21E-32    | 9.39E-31    |
| RPL21P13    | 0.027472491 | 0.326355104 | 3.570382976  | 2.58E-16    | 7.36E-16    |
| KLK6        | 7.000276228 | 0.167178771 | -5.38794829  | 6.17E-34    | 1.06E-32    |
| SLC1A7      | 0.197012157 | 0.411091676 | 1.061175503  | 0.001355409 | 0.001727984 |
| TTK         | 0.203862099 | 0.599042881 | 1.555065698  | 2.70E-30    | 2.50E-29    |
| ZYG11A      | 0.604346732 | 0.26813081  | -1.172439502 | 3.39E-09    | 6.20E-09    |
| CES3        | 3.94590223  | 14.38109304 | 1.865746218  | 3.96E-12    | 8.67E-12    |
| AC007731.2  | 0.170217514 | 0.474824141 | 1.480013796  | 3.82E-16    | 1.08E-15    |
| STPG3-AS1   | 0.204214319 | 0.67880704  | 1.732917497  | 1.09E-05    | 1.60E-05    |
| AC002563.1  | 0.199930047 | 0.442917365 | 1.147542254  | 0.032405425 | 0.037091393 |
| TRABD2A     | 0.122796511 | 0.399607113 | 1.702312697  | 1.99E-11    | 4.17E-11    |
| EGFR        | 10.23830246 | 28.39874681 | 1.471850735  | 8.44E-24    | 4.15E-23    |
| AC117503.2  | 0.117871586 | 0.358500462 | 1.604758988  | 1.58E-11    | 3.33E-11    |
| AFM         | 13.44497647 | 0.557824857 | -4.591111197 | 1.59E-14    | 4.05E-14    |
| RNU6-828P   | 0.083698907 | 0.286043048 | 1.772951592  | 5.39E-07    | 8.60E-07    |
| PHKA2-AS1   | 0.171816153 | 1.216439595 | 2.823727101  | 4.87E-35    | 1.08E-33    |
| PEBP1       | 663.8088472 | 285.8428593 | -1.215545607 | 9.00E-33    | 1.23E-31    |
| MARVELD3    | 3.483021264 | 1.273554928 | -1.451478097 | 2.88E-32    | 3.57E-31    |
| LINC01559   | 0.385118022 | 2.269257528 | 2.558847803  | 0.02663308  | 0.030711429 |
| DNHD1       | 0.214978321 | 0.669063306 | 1.637951544  | 1.39E-17    | 4.32E-17    |
| ACSM3       | 9.623633819 | 3.672314881 | -1.389891982 | 4.57E-29    | 3.66E-28    |
| NBPF8       | 0.260077852 | 1.284331605 | 2.304002294  | 9.71E-34    | 1.60E-32    |
| AC051619.3  | 0.048252895 | 0.670219514 | 3.795946297  | 1.06E-25    | 6.17E-25    |
| SNORD99     | 0.534826967 | 6.052408191 | 3.500365175  | 2.98E-25    | 1.66E-24    |
| TAGLN3      | 2.34926915  | 0.261931528 | -3.16495038  | 1.35E-37    | 6.79E-36    |
| AC087741.1  | 0.311494034 | 1.167836086 | 1.906561358  | 1.35E-13    | 3.23E-13    |
| RHCG        | 62.55005826 | 20.79701356 | -1.588634855 | 1.13E-36    | 4.04E-35    |
| BAX         | 8.618243083 | 20.25855879 | 1.233065847  | 9.01E-36    | 2.42E-34    |
| RNU6-118P   | 0.226133081 | 0.891823771 | 1.979586598  | 2.02E-10    | 3.97E-10    |
| LILRA6      | 0.102931937 | 0.594055662 | 2.528907434  | 4.39E-33    | 6.37E-32    |
| S100A14     | 12.84185961 | 2.839144884 | -2.177325754 | 5.27E-35    | 1.15E-33    |
| AC104794.4  | 6.585028931 | 1.4649556   | -2.168332839 | 3.65E-39    | 3.31E-37    |
| PHLDA3      | 6.157462569 | 18.64748827 | 1.598573461  | 8.64E-28    | 5.98E-27    |

Table S1. The differentially expressed genes(DEGs) were screened out in TCGA

| ID         | conMean     | treatMean   | logFC        | pValue      | FDR         |
|------------|-------------|-------------|--------------|-------------|-------------|
| CCR5       | 0.782307784 | 5.954670484 | 2.92821345   | 9.31E-32    | 1.06E-30    |
| CMTM4      | 27.75082024 | 7.570558575 | -1.874058759 | 2.03E-37    | 9.54E-36    |
| AC099336.2 | 3.086296126 | 6.826212712 | 1.145208878  | 5.18E-10    | 9.94E-10    |
| FLRT3      | 16.04999568 | 7.366223006 | -1.12357593  | 9.41E-24    | 4.61E-23    |
| FXYD4      | 287.305672  | 2.830038334 | -6.665621069 | 1.73E-41    | 5.32E-39    |
| ACOX2      | 11.18087994 | 3.173125389 | -1.817057296 | 5.29E-11    | 1.08E-10    |
| AC079922.1 | 0.9746661   | 3.070877361 | 1.655670926  | 7.14E-19    | 2.42E-18    |
| MAB21L4    | 5.350334356 | 0.388980104 | -3.781860784 | 3.23E-33    | 4.79E-32    |
| RNU2-22P   | 0.151161561 | 0.304805151 | 1.011795965  | 3.81E-05    | 5.39E-05    |
| MAPK8IP3   | 1.665459139 | 7.235707175 | 2.119214065  | 6.31E-27    | 4.04E-26    |
| AL451007.1 | 0.329300453 | 0.662867585 | 1.00931621   | 7.40E-16    | 2.05E-15    |
| AL353572.1 | 0.142278328 | 0.300595039 | 1.079105279  | 0.003565009 | 0.004400528 |
| CDH6       | 7.953147674 | 27.66590364 | 1.798511183  | 1.55E-22    | 6.91E-22    |
| IFFO1      | 1.449382218 | 5.079429094 | 1.809228254  | 5.76E-36    | 1.62E-34    |
| PILRB      | 0.318904555 | 1.759513662 | 2.463980105  | 4.48E-21    | 1.79E-20    |
| PLEKHG4    | 0.560673496 | 2.442771068 | 2.123285886  | 5.79E-28    | 4.10E-27    |
| ADK        | 11.93990931 | 5.263814317 | -1.181611375 | 3.17E-37    | 1.39E-35    |
| TBC1D24    | 4.893219097 | 1.893010339 | -1.370101592 | 2.96E-33    | 4.40E-32    |
| HEY1       | 2.223286863 | 6.654564612 | 1.581650172  | 6.65E-26    | 3.92E-25    |
| ELOVL2     | 0.148109133 | 1.400430385 | 3.24113776   | 3.88E-31    | 4.01E-30    |
| UMOD       | 2746.672191 | 6.621687491 | -8.696270098 | 1.69E-42    | 7.90E-40    |
| RNA5SP383  | 0.359829795 | 1.768077902 | 2.296795285  | 1.70E-16    | 4.92E-16    |
| AC000067.1 | 0.051510998 | 0.495312068 | 3.265385386  | 4.78E-29    | 3.82E-28    |
| GAS8-AS1   | 0.156197006 | 0.41205733  | 1.399478279  | 3.79E-07    | 6.10E-07    |
| LINC01359  | 0.064567435 | 0.292444003 | 2.179281787  | 2.26E-17    | 6.92E-17    |
| IL2RA      | 0.334480075 | 1.620337851 | 2.276302479  | 9.76E-19    | 3.28E-18    |
| NUPR2      | 7.460512792 | 1.344576663 | -2.472122781 | 7.44E-38    | 4.13E-36    |
| KIF20A     | 0.388391498 | 1.941276177 | 2.321421852  | 4.63E-32    | 5.53E-31    |
| RHOXF1P1   | 0.012162792 | 0.392087547 | 5.01062945   | 1.31E-10    | 2.60E-10    |
| SAMD13     | 0.569538561 | 0.205645668 | -1.469632845 | 1.35E-31    | 1.49E-30    |
| IGHV2-70   | 1.656294636 | 12.97103667 | 2.969262547  | 0.000891782 | 0.001150881 |
| AC096992.2 | 0.557621089 | 1.149312149 | 1.043413653  | 6.90E-24    | 3.41E-23    |
| AC104564.1 | 0.114588489 | 0.340977812 | 1.573215738  | 7.54E-10    | 1.43E-09    |
| AC090204.1 | 1.961060361 | 7.559274151 | 1.94661377   | 1.59E-09    | 2.97E-09    |
| AC009506.1 | 2.726282389 | 1.231779013 | -1.146191551 | 9.76E-29    | 7.51E-28    |
| PPMIK      | 5.446468014 | 1.921652678 | -1.502973353 | 2.00E-36    | 6.44E-35    |
| NFKBIE     | 6.618898931 | 15.23765777 | 1.202978012  | 2.66E-26    | 1.62E-25    |
| RNU4-22P   | 0.110118053 | 0.236174833 | 1.100804231  | 0.029879378 | 0.034308791 |
| AC129510.1 | 0.363975128 | 1.039035257 | 1.513332836  | 1.12E-11    | 2.39E-11    |
| AC015722.2 | 0.451007842 | 5.78125781  | 3.680158985  | 5.29E-09    | 9.57E-09    |
| SLIT2      | 4.282229282 | 1.86475961  | -1.199372382 | 9.51E-14    | 2.30E-13    |
| AC015912.3 | 0.244971541 | 0.58046463  | 1.244594002  | 2.26E-07    | 3.69E-07    |
| TYRO3      | 3.584852328 | 0.776616983 | -2.206638529 | 2.73E-09    | 5.03E-09    |
| CXCR1      | 0.210486932 | 0.458931935 | 1.124549533  | 6.15E-08    | 1.04E-07    |
| MYO5C      | 4.177330732 | 1.727216898 | -1.274132108 | 7.49E-30    | 6.53E-29    |
| AC073172.1 | 5.011077792 | 0.038402231 | -7.027787015 | 4.22E-51    | 6.68E-48    |
| RGN        | 14.52103692 | 5.564391136 | -1.383848737 | 6.63E-20    | 2.43E-19    |
| PFN1P2     | 0.085580625 | 0.299502024 | 1.807209641  | 2.82E-18    | 9.17E-18    |
| LINC01355  | 0.246016616 | 1.126133675 | 2.194550428  | 1.08E-20    | 4.17E-20    |
| AL596223.2 | 0.062467901 | 0.262059073 | 2.068705089  | 4.44E-08    | 7.57E-08    |
| GPR34      | 2.830308182 | 9.108638451 | 1.686276266  | 2.33E-20    | 8.81E-20    |
| PLK1       | 0.307266584 | 1.247110122 | 2.021026077  | 1.81E-32    | 2.35E-31    |
| HIST1H1B   | 0.009020555 | 0.494500548 | 5.776612109  | 2.30E-05    | 3.29E-05    |
| TRAV38-1   | 0.050240006 | 0.288100635 | 2.5196643    | 1.08E-12    | 2.44E-12    |
| LRRC37B    | 0.559228093 | 1.177956812 | 1.074777904  | 5.15E-29    | 4.10E-28    |



Table S1. The differentially expressed genes(DEGs) were screened out in TCGA

| ID         | conMean     | treatMean   | logFC        | pValue      | FDR         |
|------------|-------------|-------------|--------------|-------------|-------------|
| HOGA1      | 21.11118324 | 5.717697668 | -1.884501198 | 2.11E-31    | 2.27E-30    |
| AL355987.4 | 0.094667293 | 0.317601892 | 1.746281539  | 3.89E-10    | 7.51E-10    |
| TRBV7-9    | 0.379669498 | 2.827487652 | 2.896704718  | 1.59E-23    | 7.65E-23    |
| MNS1       | 6.072130254 | 2.916028498 | -1.058197919 | 5.98E-15    | 1.56E-14    |
| SNORD19    | 0.299609889 | 0.770660432 | 1.363010078  | 8.77E-07    | 1.38E-06    |
| AC125807.1 | 0.166468785 | 0.334650301 | 1.007402634  | 1.39E-08    | 2.45E-08    |
| AL031577.1 | 0.085848429 | 0.313183988 | 1.867146814  | 2.16E-12    | 4.82E-12    |
| LINC01871  | 0.447713907 | 2.41537707  | 2.431599392  | 1.27E-29    | 1.09E-28    |
| MIR7152    | 0.071693903 | 0.720423248 | 3.328922402  | 5.95E-10    | 1.14E-09    |
| RCS1       | 2.568773028 | 6.211168027 | 1.273785175  | 6.99E-25    | 3.78E-24    |
| KCNJ10     | 26.30641911 | 0.373563246 | -6.137918551 | 3.74E-40    | 5.79E-38    |
| SUCLG1     | 64.30233056 | 19.33853684 | -1.733392383 | 1.47E-36    | 5.04E-35    |
| RPL22P2    | 0.161800867 | 0.338646058 | 1.065558865  | 0.025906101 | 0.029915015 |
| NDRG1      | 92.62849931 | 239.8847846 | 1.372813608  | 1.15E-26    | 7.21E-26    |
| KCNK7      | 0.086428862 | 0.280360638 | 1.69769875   | 3.64E-24    | 1.85E-23    |
| AC008875.1 | 0.045316393 | 0.307309455 | 2.761587203  | 5.88E-25    | 3.19E-24    |
| TTC39A     | 2.354269958 | 5.278784082 | 1.164925896  | 2.28E-15    | 6.12E-15    |
| AL158196.1 | 0.078930766 | 0.236104233 | 1.580764245  | 7.08E-11    | 1.43E-10    |
| BEST4      | 0.215099418 | 1.350160675 | 2.650055576  | 1.25E-15    | 3.43E-15    |
| GPRC5A     | 7.360292208 | 3.055431543 | -1.268386886 | 1.29E-28    | 9.81E-28    |
| AL590762.1 | 0.059879243 | 0.408805494 | 2.771286705  | 9.71E-22    | 4.07E-21    |
| AL157395.1 | 0.220131867 | 0.610592637 | 1.471842182  | 3.75E-17    | 1.13E-16    |
| ADAM19     | 0.823084474 | 2.493044472 | 1.598796211  | 2.68E-24    | 1.37E-23    |
| POSTN      | 7.891605806 | 23.75144517 | 1.589624499  | 1.25E-12    | 2.82E-12    |
| LINC01704  | 0.033101467 | 0.309539735 | 3.225157545  | 5.23E-33    | 7.49E-32    |
| PSORS1C1   | 0.154431672 | 1.203787813 | 2.962540547  | 1.27E-36    | 4.46E-35    |
| PDK1       | 1.321960119 | 5.058250405 | 1.935959804  | 7.51E-35    | 1.57E-33    |
| MMP7       | 110.6706324 | 54.39604269 | -1.024698835 | 5.09E-11    | 1.04E-10    |
| AC008667.1 | 0.047834265 | 0.261689384 | 2.451739078  | 4.44E-17    | 1.33E-16    |
| AC084876.1 | 0.0829491   | 0.572314339 | 2.786509521  | 1.30E-24    | 6.85E-24    |
| CDC37L1-DT | 1.998020522 | 0.957912555 | -1.060605533 | 6.12E-25    | 3.32E-24    |
| ASLP1      | 0.411354244 | 0.951687987 | 1.210107333  | 1.89E-06    | 2.91E-06    |
| LINC02244  | 0.258086935 | 0.961574116 | 1.897540949  | 3.37E-15    | 8.95E-15    |
| CTSH       | 60.76937139 | 25.10300574 | -1.275484251 | 2.99E-35    | 6.94E-34    |
| DDX41      | 12.31289335 | 25.13412427 | 1.02947761   | 1.72E-33    | 2.68E-32    |
| PRSS51     | 0.113934046 | 0.459849657 | 2.012963347  | 6.53E-17    | 1.93E-16    |
| AL589739.1 | 0.094179395 | 0.244754711 | 1.377853262  | 3.71E-05    | 5.24E-05    |
| LDHAP5     | 0.194425847 | 0.500979823 | 1.365532475  | 9.80E-18    | 3.07E-17    |
| PFKFB4     | 0.961428575 | 5.080213919 | 2.40163766   | 2.61E-34    | 4.79E-33    |
| ADH6       | 9.490228603 | 1.618544615 | -2.551745706 | 1.09E-09    | 2.05E-09    |
| RPS20P33   | 0.221810671 | 0.582086805 | 1.39190554   | 4.32E-13    | 1.01E-12    |
| LINC00863  | 1.045556932 | 0.501965108 | -1.058612629 | 5.35E-28    | 3.80E-27    |
| IPO13      | 15.2066731  | 7.386499087 | -1.041741906 | 3.13E-35    | 7.19E-34    |
| TRBV20-1   | 1.141252884 | 3.140158488 | 1.46021887   | 4.18E-22    | 1.80E-21    |
| USP30-AS1  | 0.394299421 | 2.072622248 | 2.394093699  | 1.15E-28    | 8.81E-28    |
| UNC5B-AS1  | 0.11012297  | 0.404775825 | 1.878007707  | 1.01E-06    | 1.59E-06    |
| GRIN2D     | 0.101210758 | 0.388634528 | 1.941051442  | 2.35E-25    | 1.32E-24    |
| FOXJ1      | 2.582773893 | 0.28889677  | -3.160295369 | 3.67E-35    | 8.29E-34    |
| PSORS1C3   | 1.595966915 | 15.21931104 | 3.253400401  | 2.98E-29    | 2.44E-28    |
| AL136368.1 | 0.213745951 | 0.550508281 | 1.364867176  | 1.79E-21    | 7.37E-21    |
| LCAT       | 1.370049468 | 4.805940794 | 1.81059089   | 4.20E-23    | 1.96E-22    |
| TYROBP     | 15.28945163 | 96.42195363 | 2.656824997  | 1.62E-36    | 5.42E-35    |
| TRAF2      | 2.88729175  | 5.931370671 | 1.03864864   | 3.19E-33    | 4.74E-32    |
| AC130469.1 | 0.057492006 | 0.584919001 | 3.346803578  | 2.14E-19    | 7.57E-19    |
| INO80C     | 2.136129792 | 4.341637814 | 1.023240071  | 1.19E-25    | 6.85E-25    |

Table S1. The differentially expressed genes(DEGs) were screened out in TCGA

| ID                    | conMean     | treatMean   | logFC        | pValue      | FDR         |
|-----------------------|-------------|-------------|--------------|-------------|-------------|
| HAPLN2                | 0.132875689 | 0.303311861 | 1.190724745  | 3.53E-08    | 6.07E-08    |
| GEMIN8P4              | 1.14873664  | 0.567605258 | -1.017088223 | 9.76E-29    | 7.51E-28    |
| PLA2G1B               | 0.283904363 | 0.64208825  | 1.177366578  | 2.04E-05    | 2.93E-05    |
| AL353751.1            | 2.176800043 | 0.978551064 | -1.153489848 | 4.62E-19    | 1.59E-18    |
| IGLV4-69              | 4.600324245 | 36.05767816 | 2.970499046  | 0.000373714 | 0.000494411 |
| IL1RL1                | 8.227516492 | 2.075214184 | -1.987196768 | 1.62E-22    | 7.19E-22    |
| SUSD4                 | 10.24236959 | 0.79297523  | -3.691129911 | 7.50E-39    | 5.87E-37    |
| PRR4                  | 0.196089791 | 0.422960476 | 1.109008428  | 3.15E-15    | 8.39E-15    |
| COL4A4                | 11.2928144  | 2.604077625 | -2.116560721 | 1.76E-39    | 1.92E-37    |
| LINC01508             | 1.247707283 | 3.608484867 | 1.532113692  | 1.81E-14    | 4.57E-14    |
| AC011498.7            | 0.145778768 | 0.595105995 | 2.02936604   | 2.74E-23    | 1.29E-22    |
| PHYH                  | 37.20635557 | 16.68414104 | -1.157071669 | 1.16E-19    | 4.17E-19    |
| SLC5A4                | 0.295514144 | 1.068480623 | 1.854261656  | 5.39E-19    | 1.84E-18    |
| IGKV2D-29             | 1.152520884 | 6.769730069 | 2.554305417  | 6.51E-06    | 9.69E-06    |
| TRBV28                | 1.116786232 | 8.664480758 | 2.955760234  | 2.11E-30    | 1.98E-29    |
| AC022973.4            | 0.086001746 | 0.244464802 | 1.507188901  | 1.02E-11    | 2.17E-11    |
| NPIP3                 | 0.098969769 | 0.44901974  | 2.181719052  | 2.44E-24    | 1.26E-23    |
| ITK                   | 0.260597012 | 1.165764617 | 2.161384071  | 3.29E-26    | 1.99E-25    |
| PRDX3P1               | 0.172835894 | 0.363300777 | 1.071761584  | 3.25E-06    | 4.94E-06    |
| KCNK9                 | 0.046907578 | 1.113727643 | 4.569431666  | 1.55E-28    | 1.17E-27    |
| DDX39A                | 5.899424569 | 11.85008443 | 1.006251192  | 3.43E-31    | 3.58E-30    |
| SLN                   | 0.322082094 | 1.848364372 | 2.520748826  | 0.018950631 | 0.022116411 |
| VGLL1                 | 5.806579646 | 0.073854644 | -6.296856142 | 3.31E-46    | 2.27E-43    |
| RDH10                 | 25.37267486 | 7.968975777 | -1.670809403 | 2.05E-36    | 6.57E-35    |
| RNU6-50P              | 0.098265905 | 0.454446756 | 2.209348429  | 1.99E-12    | 4.43E-12    |
| CYBB                  | 5.948485569 | 21.40530795 | 1.847374268  | 1.71E-20    | 6.53E-20    |
| IGHV4-61              | 0.880962227 | 3.013112678 | 1.774102557  | 0.001377879 | 0.001755214 |
| IGHA1                 | 110.5818066 | 382.7663462 | 1.791349943  | 1.13E-08    | 2.00E-08    |
| NETO2                 | 1.020722718 | 10.1677074  | 3.316331506  | 3.05E-38    | 1.95E-36    |
| AP006623.1            | 0.196932677 | 0.93836278  | 2.252443273  | 3.04E-20    | 1.14E-19    |
| TUBBP5                | 0.814199362 | 0.275494317 | -1.563359534 | 4.31E-12    | 9.41E-12    |
| ZHX3                  | 14.31925232 | 5.88670429  | -1.282424101 | 1.67E-34    | 3.22E-33    |
| AC005682.1            | 0.192191314 | 1.129398828 | 2.55494      | 2.91E-32    | 3.60E-31    |
| AC092597.1            | 0.512674085 | 0.246553744 | -1.056139811 | 3.22E-17    | 9.75E-17    |
| RELB                  | 4.108267917 | 8.908311619 | 1.116621757  | 1.70E-26    | 1.05E-25    |
| TNNT1                 | 0.231251107 | 1.199889323 | 2.375369161  | 5.48E-15    | 1.44E-14    |
| TMEM246-A5            | 3.836072087 | 1.068066228 | -1.844628723 | 6.19E-12    | 1.34E-11    |
| DTX2P1-UPK0.082123084 | 0.082123084 | 0.289376934 | 1.81709021   | 2.98E-26    | 1.81E-25    |
| CHRNA6                | 0.030612507 | 0.255630475 | 3.061866717  | 4.13E-25    | 2.27E-24    |
| EPS8L3                | 0.134585474 | 1.491126405 | 3.469807954  | 0.000160301 | 0.000217424 |
| RN7SL124P             | 0.003968255 | 0.406173429 | 6.677447317  | 1.01E-25    | 5.84E-25    |
| AC130371.2            | 4.471458525 | 0.744195501 | -2.58699192  | 4.69E-36    | 1.34E-34    |
| SMIM10L2B             | 3.039244736 | 1.042249146 | -1.544012663 | 4.00E-34    | 7.13E-33    |
| ACTG1P17              | 0.078803524 | 0.232229241 | 1.559217585  | 1.26E-17    | 3.92E-17    |
| OVOL1                 | 3.546528335 | 0.689473556 | -2.362840349 | 1.18E-36    | 4.21E-35    |
| SVEP1                 | 3.704366904 | 1.228410829 | -1.592433864 | 1.30E-22    | 5.83E-22    |
| CCDC181               | 2.103362587 | 0.261561039 | -3.007478008 | 2.66E-39    | 2.66E-37    |
| TRBV12-3              | 0.085789612 | 0.472627531 | 2.461828806  | 6.04E-17    | 1.79E-16    |
| PSD2                  | 0.051766686 | 0.282810553 | 2.449740076  | 4.20E-23    | 1.96E-22    |
| AC092296.1            | 0.692633397 | 0.195727952 | -1.823242149 | 2.21E-07    | 3.61E-07    |
| SLC22A8               | 36.29032022 | 0.563868794 | -6.008081474 | 2.37E-19    | 8.35E-19    |
| AC069185.1            | 0.485633755 | 0.178681834 | -1.442475733 | 1.26E-22    | 5.63E-22    |
| COL9A2                | 6.876993875 | 1.50120491  | -2.195657147 | 6.29E-34    | 1.07E-32    |
| 3-Mar                 | 0.313182803 | 0.865184127 | 1.466002202  | 4.06E-30    | 3.68E-29    |
| TRPC2                 | 0.063280854 | 0.912948132 | 3.850691929  | 4.18E-17    | 1.26E-16    |

Table S1. The differentially expressed genes(DEGs) were screened out in TCGA

| ID         | conMean     | treatMean   | logFC        | pValue      | FDR         |
|------------|-------------|-------------|--------------|-------------|-------------|
| LINC01127  | 1.073906914 | 4.993360994 | 2.217142263  | 0.000195861 | 0.000264194 |
| MIR4653    | 0.590973042 | 1.59432913  | 1.431785261  | 1.27E-12    | 2.86E-12    |
| LDLRAD3    | 1.786375321 | 4.943504661 | 1.468498967  | 5.78E-31    | 5.84E-30    |
| AL021407.1 | 0.029023622 | 0.230397698 | 2.98882682   | 3.62E-18    | 1.17E-17    |
| NKD1       | 0.944592378 | 0.129040163 | -2.871871726 | 1.68E-36    | 5.56E-35    |
| AC243732.1 | 0.063514948 | 0.265728701 | 2.064785979  | 3.86E-24    | 1.95E-23    |
| SH3GL2     | 6.929802973 | 0.996888801 | -2.797309843 | 8.95E-34    | 1.48E-32    |
| MIR4645    | 0.633917863 | 2.005794383 | 1.661805895  | 2.10E-10    | 4.13E-10    |
| IGLV8-61   | 4.347945808 | 20.09799394 | 2.208645644  | 2.13E-05    | 3.06E-05    |
| MIR8083    | 0.059227161 | 0.381834337 | 2.688616003  | 3.49E-06    | 5.28E-06    |
| AC046185.3 | 0.46498034  | 1.00762808  | 1.115721608  | 1.76E-20    | 6.75E-20    |
| CLDN10-AS1 | 1.514802259 | 0.280193245 | -2.434635396 | 4.78E-33    | 6.89E-32    |
| AC092813.2 | 3.771409921 | 0.115020279 | -5.035143815 | 1.24E-17    | 3.86E-17    |
| GAPDHP2    | 0.075626262 | 0.228777572 | 1.596986417  | 6.65E-24    | 3.30E-23    |
| AC005831.1 | 0.239123886 | 1.071510317 | 2.163815589  | 2.13E-31    | 2.29E-30    |
| PLCB4      | 2.049854081 | 4.345284259 | 1.083929343  | 4.37E-06    | 6.57E-06    |
| HCST       | 2.506624654 | 9.894549697 | 1.98088807   | 1.59E-27    | 1.08E-26    |
| IRF9       | 0.563746139 | 1.906369183 | 1.757709983  | 2.67E-19    | 9.36E-19    |
| AP001992.1 | 0.188532858 | 0.812645846 | 2.107810774  | 9.76E-19    | 3.28E-18    |
| AC011481.2 | 0.173586929 | 0.497653643 | 1.519483684  | 5.88E-23    | 2.71E-22    |
| SAMD12     | 3.19535639  | 0.881558896 | -1.857847987 | 1.26E-36    | 4.42E-35    |
| RAB42      | 0.50168346  | 14.45848814 | 4.84899552   | 2.97E-37    | 1.32E-35    |
| AC002091.2 | 0.206906069 | 0.703430353 | 1.765431625  | 1.35E-20    | 5.20E-20    |
| CEACAM1    | 9.381274944 | 4.287132586 | -1.129770968 | 4.59E-25    | 2.51E-24    |
| IRF4       | 0.192470378 | 0.781507344 | 2.021623002  | 8.01E-17    | 2.36E-16    |
| AC017104.1 | 0.252635922 | 0.657047316 | 1.378937477  | 2.51E-23    | 1.19E-22    |
| ADAMTS18   | 0.13645773  | 0.386673367 | 1.502661276  | 8.30E-13    | 1.90E-12    |
| AC087645.2 | 0.129727861 | 0.355541245 | 1.454528579  | 8.90E-19    | 3.00E-18    |
| TRAV23DV6  | 0.112269687 | 0.428993963 | 1.933988895  | 3.94E-15    | 1.04E-14    |
| C2CD4C     | 0.275868908 | 0.754172187 | 1.450911079  | 1.24E-13    | 2.99E-13    |
| AC122710.2 | 0.024552503 | 0.224256705 | 3.191209129  | 3.67E-28    | 2.66E-27    |
| RAET1E     | 0.890929207 | 0.255746995 | -1.800593513 | 2.61E-16    | 7.43E-16    |
| AC009495.2 | 0.078292324 | 0.441091062 | 2.494133757  | 1.51E-16    | 4.38E-16    |
| AC026401.3 | 1.351287322 | 3.591197765 | 1.410130638  | 1.23E-32    | 1.65E-31    |
| CDCA3      | 0.23019797  | 0.736696491 | 1.678195258  | 1.47E-29    | 1.24E-28    |
| C21orf62   | 5.731995479 | 1.247830136 | -2.199615915 | 1.63E-31    | 1.78E-30    |
| AC005006.1 | 0.066921196 | 0.373100215 | 2.479028058  | 3.27E-16    | 9.27E-16    |
| PTPRR      | 0.13341116  | 0.400996282 | 1.587709511  | 1.73E-11    | 3.63E-11    |
| BNIP3P26   | 0.060690061 | 0.226976171 | 1.903008666  | 7.10E-10    | 1.35E-09    |
| PARP6      | 3.098685861 | 6.226735974 | 1.006819603  | 1.78E-25    | 1.01E-24    |
| AL157871.3 | 0.114066558 | 0.39996468  | 1.809996714  | 3.28E-07    | 5.30E-07    |
| AC127070.1 | 0.550970137 | 0.220776136 | -1.319389892 | 3.87E-22    | 1.67E-21    |
| PI16       | 2.674226382 | 0.563014786 | -2.247876883 | 1.82E-21    | 7.51E-21    |
| RF00100    | 2.072775651 | 240.0493575 | 6.855623291  | 0.000175916 | 0.000238132 |
| DDX11      | 0.904536835 | 2.189761946 | 1.275522881  | 7.04E-21    | 2.76E-20    |
| OCLN       | 5.049051958 | 1.205095843 | -2.066864634 | 1.05E-35    | 2.76E-34    |
| LUCAT1     | 0.03662434  | 1.489655172 | 5.34603183   | 3.36E-36    | 9.95E-35    |
| AF127936.1 | 0.1192279   | 0.604294188 | 2.341529197  | 1.02E-22    | 4.59E-22    |
| AC105446.1 | 0.233053782 | 1.497607159 | 2.683924406  | 1.19E-22    | 5.33E-22    |
| MIR210HG   | 1.204069344 | 11.55013316 | 3.261919097  | 8.61E-37    | 3.26E-35    |
| CHST13     | 1.531017755 | 6.216933418 | 2.021712114  | 5.29E-22    | 2.26E-21    |
| DNAJC5B    | 0.038939513 | 0.519577129 | 3.738031172  | 3.25E-34    | 5.87E-33    |
| AC006128.1 | 0.341817386 | 1.677452632 | 2.294974343  | 4.86E-19    | 1.67E-18    |
| AL357078.3 | 0.043064464 | 0.264383725 | 2.618063582  | 2.08E-17    | 6.38E-17    |
| ESRRG      | 9.957923889 | 1.152864747 | -3.110621721 | 5.61E-41    | 1.41E-38    |

Table S1. The differentially expressed genes(DEGs) were screened out in TCGA

| ID         | conMean     | treatMean   | logFC        | pValue      | FDR         |
|------------|-------------|-------------|--------------|-------------|-------------|
| AC137932.3 | 0.086061301 | 0.38460449  | 2.159939047  | 8.46E-22    | 3.57E-21    |
| TRBV24-1   | 0.099810743 | 0.523539388 | 2.391031074  | 6.28E-19    | 2.14E-18    |
| NDUFS1     | 20.33792392 | 9.020242729 | -1.172934256 | 8.93E-36    | 2.40E-34    |
| RPL39P38   | 0.237425852 | 0.798983069 | 1.750687901  | 1.29E-16    | 3.75E-16    |
| CIART      | 1.53947355  | 3.938089617 | 1.355058862  | 6.16E-22    | 2.62E-21    |
| HCLS1      | 4.375098833 | 16.71255883 | 1.933545126  | 7.17E-34    | 1.21E-32    |
| MIR324     | 0.104733558 | 0.788007903 | 2.911486331  | 1.85E-17    | 5.70E-17    |
| AC008569.2 | 0.056332537 | 0.251062942 | 2.156008736  | 1.51E-19    | 5.38E-19    |
| U62317.2   | 1.890257183 | 6.762733048 | 1.839023869  | 1.62E-28    | 1.22E-27    |
| SLC9A3     | 57.94358244 | 5.313743508 | -3.446848388 | 1.73E-34    | 3.32E-33    |
| RNF139-AS1 | 0.128615294 | 0.258603535 | 1.00767979   | 7.27E-06    | 1.08E-05    |
| ITGA10     | 0.509532919 | 1.152932879 | 1.178061263  | 1.65E-08    | 2.90E-08    |
| IL11       | 1.442833319 | 0.134805611 | -3.419952193 | 6.57E-30    | 5.79E-29    |
| CPA6       | 0.079085163 | 0.451020925 | 2.511715403  | 1.16E-28    | 8.84E-28    |
| TTYH2      | 0.93637589  | 2.067042399 | 1.142408288  | 1.34E-19    | 4.81E-19    |
| MAPT-AS1   | 0.118242614 | 0.266138322 | 1.1704262    | 0.003325584 | 0.004112633 |
| IGHV1-69   | 1.61452826  | 9.229171318 | 2.515088421  | 7.28E-05    | 0.000101045 |
| AC009095.1 | 0.06693367  | 0.223331941 | 1.73838558   | 2.95E-17    | 8.99E-17    |
| AL359697.1 | 0.174767724 | 0.398858149 | 1.190436978  | 5.82E-06    | 8.68E-06    |
| MYZAP      | 2.186091749 | 0.767622731 | -1.509884612 | 1.30E-33    | 2.07E-32    |
| TFCP2L1    | 38.44710229 | 4.12019332  | -3.222090933 | 2.26E-37    | 1.05E-35    |
| TLR8       | 0.398471467 | 1.794289803 | 2.170864597  | 2.55E-23    | 1.21E-22    |
| NBL1       | 5.508348625 | 11.66995813 | 1.083107609  | 9.26E-06    | 1.37E-05    |
| TRBV11-2   | 0.139708356 | 0.863098204 | 2.627106406  | 5.48E-19    | 1.88E-18    |
| TNFRSF4    | 0.570296188 | 5.561031829 | 3.285569301  | 6.99E-38    | 3.89E-36    |
| SH2D1B     | 0.235735878 | 0.56113457  | 1.251175452  | 1.94E-17    | 5.96E-17    |
| MIR378A    | 0.217944184 | 0.541482223 | 1.31295527   | 5.03E-05    | 7.06E-05    |
| MIR4668    | 0.251692397 | 1.156256614 | 2.199728074  | 2.18E-12    | 4.85E-12    |
| AL683807.1 | 0.02567042  | 0.591022164 | 4.52503342   | 4.31E-34    | 7.60E-33    |
| TMEM100    | 0.880249875 | 2.144307105 | 1.284526519  | 0.006120712 | 0.007416469 |
| NRL        | 1.118936979 | 0.486626098 | -1.201243182 | 2.59E-36    | 8.02E-35    |
| AL683842.1 | 0.043379087 | 0.432960587 | 3.319164122  | 4.89E-25    | 2.67E-24    |
| GIPC3      | 2.011482443 | 4.90397621  | 1.285692835  | 1.78E-19    | 6.31E-19    |
| ARC        | 4.00972511  | 0.939595361 | -2.09339184  | 2.28E-10    | 4.46E-10    |
| CAVIN3     | 6.530876361 | 31.40651909 | 2.265715551  | 4.31E-33    | 6.27E-32    |
| AC096642.1 | 0.071196627 | 0.310014922 | 2.122456852  | 6.13E-20    | 2.25E-19    |
| PA2G4P4    | 0.069492349 | 0.266114641 | 1.937121832  | 1.83E-24    | 9.55E-24    |
| AC092809.2 | 0.144747899 | 0.353254512 | 1.287165581  | 4.43E-10    | 8.53E-10    |
| APBA2      | 0.235244325 | 0.551278252 | 1.228620766  | 1.00E-06    | 1.57E-06    |
| MTCL1      | 0.662110686 | 3.213721341 | 2.279100521  | 2.72E-32    | 3.39E-31    |
| MCOLN3     | 1.259686615 | 0.441798555 | -1.511604258 | 7.80E-28    | 5.44E-27    |
| EVL        | 2.491277997 | 8.103930572 | 1.701735796  | 2.16E-37    | 1.01E-35    |
| AC084048.1 | 0.016598668 | 0.254649187 | 3.939371775  | 0.031486334 | 0.036077507 |
| SEC61G     | 14.13858258 | 30.23772851 | 1.096712272  | 2.45E-36    | 7.63E-35    |
| HIST1H4H   | 3.257064269 | 7.366496292 | 1.177406409  | 2.63E-08    | 4.55E-08    |
| AC005387.1 | 0.085842017 | 0.450948958 | 2.393208269  | 1.84E-18    | 6.05E-18    |
| LRRN2      | 6.521923876 | 1.189875536 | -2.454486931 | 7.09E-33    | 9.85E-32    |
| AC027796.1 | 0.080155765 | 0.230650849 | 1.524832417  | 1.59E-05    | 2.30E-05    |
| DHRS9      | 0.14599854  | 0.553026016 | 1.921393407  | 1.57E-24    | 8.24E-24    |
| VNN2       | 1.094486039 | 3.860287269 | 1.81845466   | 5.05E-19    | 1.73E-18    |
| AC010175.1 | 0.247627247 | 0.507440309 | 1.035068062  | 6.23E-08    | 1.05E-07    |
| CCER2      | 0.072077471 | 0.453540799 | 2.653612032  | 6.15E-16    | 1.72E-15    |
| IGKV2-30   | 0.783076669 | 1.979691728 | 1.338050325  | 0.000794108 | 0.001028116 |
| LINC01976  | 1.911128415 | 0.059512246 | -5.005094333 | 6.44E-51    | 9.47E-48    |
| AL138693.1 | 0.318990567 | 0.982916411 | 1.623554972  | 2.65E-15    | 7.09E-15    |

Table S1. The differentially expressed genes(DEGs) were screened out in TCGA

| ID          | conMean     | treatMean   | logFC        | pValue      | FDR         |
|-------------|-------------|-------------|--------------|-------------|-------------|
| NDC80       | 0.315854479 | 1.294332188 | 2.034875996  | 6.24E-34    | 1.06E-32    |
| MARCO       | 0.513380503 | 2.577398728 | 2.327815329  | 7.27E-11    | 1.47E-10    |
| CPA4        | 0.193966124 | 1.446292202 | 2.898482442  | 0.004411008 | 0.005403243 |
| AC254562.1  | 0.213898801 | 0.540813872 | 1.338203763  | 3.87E-06    | 5.84E-06    |
| KIF13B      | 15.28129669 | 6.018791947 | -1.344221116 | 5.47E-37    | 2.21E-35    |
| MYL3        | 9.070032205 | 3.906237016 | -1.215328184 | 4.40E-16    | 1.24E-15    |
| AC007546.1  | 0.176552719 | 0.591982441 | 1.745455342  | 1.03E-11    | 2.19E-11    |
| AC015819.1  | 0.225566245 | 0.766739407 | 1.765185141  | 2.52E-29    | 2.07E-28    |
| AL731569.1  | 0.145928478 | 0.371474343 | 1.34800112   | 3.27E-10    | 6.35E-10    |
| SLC14A2     | 12.24156341 | 0.132961566 | -6.524634734 | 3.45E-29    | 2.80E-28    |
| CADM3       | 0.819236038 | 4.931648471 | 2.589718882  | 1.85E-11    | 3.88E-11    |
| RNU1-16P    | 0.080123852 | 0.244955529 | 1.612216165  | 3.18E-05    | 4.52E-05    |
| STMN3       | 7.105869833 | 31.17910834 | 2.133496504  | 1.23E-29    | 1.05E-28    |
| AC025171.5  | 0.151054002 | 0.450048807 | 1.575017061  | 1.02E-20    | 3.96E-20    |
| AL662797.1  | 0.164724244 | 0.387608723 | 1.234548128  | 2.08E-20    | 7.91E-20    |
| AC007216.2  | 0.066103292 | 0.231464753 | 1.807998498  | 4.26E-09    | 7.74E-09    |
| RALGPS1     | 2.674809842 | 0.69178597  | -1.951038672 | 1.14E-35    | 2.94E-34    |
| AC090907.1  | 0.225473657 | 0.495996357 | 1.137370638  | 3.64E-11    | 7.50E-11    |
| AC011461.1  | 0.062127226 | 0.288901464 | 2.217279974  | 4.07E-13    | 9.49E-13    |
| TRAV20      | 0.092756593 | 0.475867866 | 2.359039294  | 9.24E-14    | 2.24E-13    |
| CD180       | 0.324302843 | 1.435832085 | 2.146473465  | 9.05E-28    | 6.26E-27    |
| AC005740.3  | 0.06267081  | 0.284944327 | 2.184814534  | 1.00E-14    | 2.58E-14    |
| MTHFD2P1    | 0.08121303  | 0.571417784 | 2.814762823  | 1.24E-06    | 1.93E-06    |
| TEX29       | 0.098517918 | 0.351736245 | 1.836035965  | 5.25E-13    | 1.22E-12    |
| AC023421.1  | 10.3351166  | 0.109043989 | -6.566500613 | 2.25E-34    | 4.19E-33    |
| UBAP1L      | 0.154287469 | 0.735236811 | 2.252588108  | 1.05E-24    | 5.59E-24    |
| BAZ1A       | 2.120259778 | 4.877858391 | 1.202006839  | 4.45E-30    | 4.00E-29    |
| RN7SL368P   | 0.070209149 | 0.414291435 | 2.560915054  | 2.75E-12    | 6.09E-12    |
| AP002907.1  | 0.159508453 | 0.54597421  | 1.775199927  | 6.88E-15    | 1.79E-14    |
| AP000424.2  | 0.94571865  | 0.399804344 | -1.242116902 | 4.88E-15    | 1.28E-14    |
| SNORD73B    | 0.179871367 | 0.485860528 | 1.433576685  | 0.000255873 | 0.000342651 |
| AP1M2       | 36.51333944 | 6.079679493 | -2.586356446 | 8.52E-40    | 1.10E-37    |
| RNU7-159P   | 1.965865924 | 0.043700314 | -5.491377477 | 6.61E-47    | 5.67E-44    |
| HIST1H3D    | 0.489141903 | 1.501251259 | 1.617840489  | 2.84E-07    | 4.60E-07    |
| AC107021.2  | 0.347370031 | 2.442888311 | 2.81404271   | 7.27E-36    | 1.99E-34    |
| PERM1       | 0.265677277 | 2.254864083 | 3.085293726  | 6.74E-19    | 2.29E-18    |
| SMTNL2      | 15.94501939 | 7.027830481 | -1.181954555 | 7.79E-26    | 4.57E-25    |
| MIR146B     | 0.053660121 | 0.442588382 | 3.044043372  | 1.28E-08    | 2.26E-08    |
| AL022328.2  | 0.640800372 | 2.063638931 | 1.687243678  | 2.97E-17    | 9.04E-17    |
| APOO        | 22.04685331 | 9.295915636 | -1.245903877 | 1.49E-34    | 2.90E-33    |
| AC016027.5  | 0.061779282 | 0.303070683 | 2.294459302  | 4.64E-11    | 9.47E-11    |
| AC005387.2  | 0.076183328 | 0.48807851  | 2.679566005  | 2.08E-23    | 9.95E-23    |
| RN7SL209P   | 0.041212979 | 0.298990371 | 2.858928373  | 8.14E-21    | 3.18E-20    |
| LINC01615   | 0.062430013 | 0.827937884 | 3.729210855  | 5.52E-33    | 7.87E-32    |
| AC091057.1  | 0.079306576 | 0.297423205 | 1.907004817  | 4.39E-33    | 6.37E-32    |
| PPP1R1A     | 50.03813301 | 7.079538523 | -2.821300735 | 8.85E-32    | 1.01E-30    |
| CATSPER1    | 0.062505563 | 0.25256355  | 2.014589944  | 9.23E-29    | 7.14E-28    |
| LAT         | 0.025849011 | 0.275403271 | 3.413364728  | 3.03E-29    | 2.48E-28    |
| KCNIP2      | 0.178899345 | 0.613359249 | 1.777584213  | 1.18E-21    | 4.91E-21    |
| AC091180.4  | 0.047962231 | 0.223186734 | 2.218280597  | 3.70E-13    | 8.64E-13    |
| PARD6A      | 6.492252083 | 2.632609051 | -1.302225725 | 9.30E-29    | 7.19E-28    |
| NTN4        | 90.44181    | 28.77264223 | -1.652292153 | 2.06E-32    | 2.63E-31    |
| ERVMER34-14 | 5.57869131  | 0.177435501 | -4.682992905 | 2.02E-40    | 3.58E-38    |
| PDZRN4      | 0.600891836 | 0.223037683 | -1.429817844 | 2.04E-26    | 1.25E-25    |
| AC018413.1  | 0.679717436 | 0.33943727  | -1.00179015  | 3.74E-29    | 3.02E-28    |

Table S1. The differentially expressed genes(DEGs) were screened out in TCGA

| ID          | conMean     | treatMean   | logFC        | pValue      | FDR         |
|-------------|-------------|-------------|--------------|-------------|-------------|
| AC068792.1  | 0.226520147 | 0.576236966 | 1.347022843  | 5.95E-21    | 2.35E-20    |
| SLC2A5      | 5.262929739 | 18.04480087 | 1.777645183  | 4.95E-17    | 1.48E-16    |
| AC025917.1  | 0.206882977 | 0.615589517 | 1.573153723  | 6.52E-14    | 1.59E-13    |
| APOM        | 38.40334376 | 16.86765048 | -1.186972899 | 0.00079868  | 0.001033839 |
| BARX2       | 2.129813957 | 13.56773695 | 2.671380785  | 9.90E-31    | 9.73E-30    |
| AC245128.3  | 0.143240538 | 0.307066672 | 1.100112093  | 5.84E-07    | 9.28E-07    |
| SORD        | 13.67269904 | 3.156407983 | -2.114942466 | 1.93E-24    | 1.00E-23    |
| ARL4D       | 33.24288156 | 4.751545976 | -2.806576549 | 3.10E-36    | 9.31E-35    |
| AP000445.1  | 0.554602745 | 2.255348534 | 2.023823737  | 2.15E-18    | 7.04E-18    |
| AC010359.1  | 1.354879143 | 0.515147598 | -1.395106416 | 2.55E-28    | 1.88E-27    |
| ABHD17C     | 9.568681139 | 2.25346936  | -2.086172256 | 4.45E-38    | 2.70E-36    |
| LINC01503   | 9.189198282 | 3.606180712 | -1.349467304 | 1.32E-26    | 8.24E-26    |
| AC015660.3  | 0.089215582 | 0.267705957 | 1.585281636  | 6.92E-08    | 1.17E-07    |
| VCAM1       | 29.0877245  | 103.6318576 | 1.832985227  | 8.23E-22    | 3.48E-21    |
| PLXNA3      | 1.441355619 | 3.711254294 | 1.364480528  | 2.58E-29    | 2.12E-28    |
| TAGAP       | 0.799857706 | 3.178739016 | 1.990639299  | 2.03E-29    | 1.68E-28    |
| RNY1P16     | 0.205965311 | 0.639770391 | 1.635152849  | 3.02E-05    | 4.29E-05    |
| AC078883.1  | 0.372244354 | 1.589411205 | 2.094170548  | 6.83E-39    | 5.41E-37    |
| CEMP2       | 5.911299542 | 13.94990272 | 1.238707829  | 1.98E-29    | 1.65E-28    |
| AP001330.5  | 0.886319618 | 1.778865362 | 1.005058368  | 3.56E-21    | 1.43E-20    |
| CP          | 5.26941831  | 67.03234319 | 3.669141749  | 1.15E-24    | 6.10E-24    |
| PAPPA2      | 7.125206577 | 0.665734173 | -3.419913712 | 2.84E-35    | 6.62E-34    |
| IGKV2OR22-0 | 0.197062208 | 0.914330154 | 2.214064075  | 0.003315848 | 0.004101333 |
| KDM4A-AS1   | 0.134700932 | 0.367634373 | 1.448511834  | 1.92E-15    | 5.18E-15    |
| CHST1       | 1.472567306 | 3.989618213 | 1.437917118  | 1.68E-06    | 2.60E-06    |
| TSPAN32     | 0.154131487 | 0.642675757 | 2.059929439  | 1.82E-30    | 1.72E-29    |
| AC008781.3  | 0.107344848 | 0.414423765 | 1.948853791  | 3.07E-16    | 8.71E-16    |
| NEURL3      | 2.956253514 | 1.455666243 | -1.022090383 | 1.30E-09    | 2.44E-09    |
| CNTNAP1     | 0.773412464 | 2.399863273 | 1.633642295  | 2.10E-25    | 1.18E-24    |
| CCDC74A     | 1.416309654 | 3.969114231 | 1.486680361  | 1.12E-22    | 5.06E-22    |
| HOXB7       | 23.16635154 | 11.35267813 | -1.028998178 | 4.35E-25    | 2.39E-24    |
| CATIP-AS2   | 1.148341592 | 0.378829991 | -1.599929402 | 4.61E-30    | 4.15E-29    |
| FAM151A     | 57.19443873 | 3.926809124 | -3.864445497 | 6.41E-20    | 2.35E-19    |
| AC116407.1  | 0.612525028 | 0.223748986 | -1.452887647 | 3.85E-27    | 2.51E-26    |
| PPP2R2B     | 0.950009132 | 0.19622742  | -2.275414726 | 5.89E-39    | 4.85E-37    |
| SOST        | 8.345863233 | 0.077795032 | -6.745239445 | 9.48E-33    | 1.29E-31    |
| HSD11B2     | 206.4807    | 27.00716632 | -2.934592757 | 4.49E-38    | 2.70E-36    |
| AC012181.2  | 0.51326245  | 1.485844042 | 1.533514072  | 1.45E-15    | 3.94E-15    |
| UQCRFS1     | 37.26782847 | 15.40110064 | -1.274897301 | 1.48E-35    | 3.71E-34    |
| RN7SL431P   | 0.059403953 | 0.300717317 | 2.339777113  | 5.81E-13    | 1.34E-12    |
| FDFT1       | 23.19094181 | 11.39448641 | -1.025225511 | 1.13E-37    | 5.83E-36    |
| CXCR4       | 13.70918847 | 94.82623863 | 2.790143139  | 4.33E-39    | 3.76E-37    |
| ADAM11      | 0.054528636 | 0.238834573 | 2.130925718  | 1.57E-25    | 8.94E-25    |
| RNA5SP217   | 0.180299276 | 0.564463376 | 1.646486371  | 4.35E-09    | 7.90E-09    |
| CICP14      | 1.007750621 | 2.508695231 | 1.315798544  | 7.46E-14    | 1.82E-13    |
| SDR42E1     | 1.390640193 | 0.575634417 | -1.272524435 | 8.28E-32    | 9.45E-31    |
| CDCA7       | 0.261865057 | 1.069732386 | 2.030354458  | 5.11E-29    | 4.06E-28    |
| TGFB3       | 15.92464507 | 5.356685893 | -1.571848612 | 1.99E-34    | 3.77E-33    |
| GLIPR2      | 3.714377196 | 7.536702188 | 1.020813057  | 5.09E-21    | 2.02E-20    |
| HS3ST2      | 0.088621338 | 2.57976382  | 4.863441071  | 6.44E-37    | 2.51E-35    |
| MFSD6L      | 2.58066242  | 0.221457737 | -3.542638129 | 5.62E-37    | 2.26E-35    |
| GJC2        | 0.616661364 | 1.579862504 | 1.357248641  | 2.30E-11    | 4.80E-11    |
| SERPINB9P1  | 0.63220218  | 2.841475856 | 2.168182542  | 1.36E-21    | 5.64E-21    |
| CFD         | 5.613680972 | 12.94402018 | 1.20526678   | 1.78E-13    | 4.23E-13    |
| TPTEP1      | 1.90681709  | 0.39160884  | -2.283681222 | 2.13E-33    | 3.26E-32    |

Table S1. The differentially expressed genes(DEGs) were screened out in TCGA

| ID         | conMean     | treatMean   | logFC        | pValue      | FDR         |
|------------|-------------|-------------|--------------|-------------|-------------|
| VENTX      | 0.17365028  | 0.678147674 | 1.965414731  | 6.10E-24    | 3.04E-23    |
| RPL26P27   | 0.080144208 | 0.254086094 | 1.664647256  | 3.29E-10    | 6.38E-10    |
| PEBP1P2    | 0.582720751 | 0.231082755 | -1.334395087 | 2.26E-20    | 8.53E-20    |
| RPL35P2    | 0.284118974 | 0.623069527 | 1.132897977  | 6.40E-19    | 2.18E-18    |
| CYP27B1    | 5.799186388 | 0.492092382 | -3.558849421 | 2.10E-19    | 7.44E-19    |
| IPO5P1     | 4.101562917 | 1.94219448  | -1.078486088 | 4.60E-29    | 3.68E-28    |
| IL18R1     | 1.058179985 | 2.621489478 | 1.308801721  | 1.73E-20    | 6.62E-20    |
| CHGB       | 7.505851206 | 0.56755816  | -3.725175547 | 2.27E-39    | 2.34E-37    |
| TNS4       | 1.063752366 | 0.205528647 | -2.371750942 | 2.48E-34    | 4.57E-33    |
| SLC52A3    | 7.860796167 | 0.926636243 | -3.084600425 | 2.39E-40    | 3.97E-38    |
| QPRT       | 39.26529278 | 17.63692326 | -1.154655748 | 7.63E-22    | 3.23E-21    |
| DNA2       | 0.293911138 | 0.835864797 | 1.50788957   | 2.94E-21    | 1.19E-20    |
| AL158071.3 | 0.089309709 | 0.305014679 | 1.771989745  | 1.43E-15    | 3.90E-15    |
| AC010519.1 | 0.056486838 | 0.413089523 | 2.87046782   | 7.44E-24    | 3.67E-23    |
| RNF152     | 20.80206882 | 9.55677838  | -1.122130747 | 1.09E-16    | 3.18E-16    |
| CD33       | 0.283466928 | 1.113944592 | 1.974425142  | 1.34E-30    | 1.29E-29    |
| AL031123.2 | 0.85046066  | 0.229017389 | -1.892787359 | 2.88E-32    | 3.57E-31    |
| COL15A1    | 8.31187869  | 22.55457991 | 1.440173912  | 1.39E-17    | 4.32E-17    |
| AL391840.1 | 0.147756938 | 0.372471734 | 1.333905076  | 0.006337139 | 0.007673295 |
| NPM1P26    | 0.126342944 | 0.27644854  | 1.129665858  | 0.000587863 | 0.00076744  |
| AL133330.1 | 0.043470985 | 0.241123775 | 2.471649203  | 8.02E-15    | 2.08E-14    |
| AC124017.1 | 4.182311133 | 0.042685007 | -6.614427172 | 1.43E-41    | 4.45E-39    |
| HNRNPA1P2  | 0.109964533 | 0.664512247 | 2.595257507  | 5.03E-26    | 3.00E-25    |
| HS6ST1P1   | 1.514442026 | 0.269082608 | -2.4926653   | 4.18E-21    | 1.67E-20    |
| FBLN1      | 16.56879004 | 5.448985631 | -1.60440866  | 2.38E-25    | 1.33E-24    |
| ZDHHC11B   | 0.327275326 | 1.039894523 | 1.667860457  | 1.96E-07    | 3.22E-07    |
| SLC39A14   | 15.33448104 | 51.30762502 | 1.742393903  | 3.30E-27    | 2.17E-26    |
| FRMD1      | 1.282117849 | 0.338503478 | -1.921286314 | 1.01E-12    | 2.30E-12    |
| AC087500.2 | 0.323473991 | 0.681875334 | 1.07585828   | 1.74E-09    | 3.25E-09    |
| AL096799.1 | 0.226582897 | 5.78237663  | 4.67355171   | 4.33E-31    | 4.45E-30    |
| FBP1       | 122.671715  | 25.50755822 | -2.265805934 | 4.77E-26    | 2.85E-25    |
| ENHO       | 0.703398515 | 0.232181354 | -1.59909017  | 1.33E-23    | 6.45E-23    |
| ZDHHC2     | 18.55405651 | 5.227870612 | -1.827439301 | 2.89E-36    | 8.76E-35    |
| MPC1       | 84.37310833 | 27.62483053 | -1.610817638 | 2.53E-33    | 3.82E-32    |
| TRIB1      | 25.07911036 | 12.34636964 | -1.022399281 | 2.69E-21    | 1.09E-20    |
| RNU6-26P   | 0.254321776 | 0.685112199 | 1.429685276  | 4.03E-06    | 6.07E-06    |
| FBXL8      | 0.709039438 | 2.693148207 | 1.925355846  | 6.47E-36    | 1.80E-34    |
| AL139246.2 | 0.044376466 | 0.36833398  | 3.053147798  | 2.11E-21    | 8.66E-21    |
| AC138207.6 | 0.05887014  | 0.241793042 | 2.038164763  | 1.79E-30    | 1.70E-29    |
| LRRC37A15P | 0.077409195 | 0.265325007 | 1.777183799  | 1.12E-19    | 4.05E-19    |
| CCDC178    | 1.152512514 | 0.418963368 | -1.459886402 | 8.06E-30    | 6.99E-29    |
| EVC        | 22.58294536 | 9.979299643 | -1.178223186 | 1.97E-23    | 9.46E-23    |
| AL109659.2 | 0.08474623  | 0.3250274   | 1.939340252  | 1.99E-19    | 7.05E-19    |
| AJAP1      | 2.044710165 | 0.921870133 | -1.149260924 | 4.06E-19    | 1.40E-18    |
| AC110285.7 | 0.103919824 | 0.293813742 | 1.499430984  | 2.22E-22    | 9.76E-22    |
| IGHV1-14   | 0.073585689 | 0.357964556 | 2.282319629  | 0.000966239 | 0.001244319 |
| SLC44A4    | 29.69985932 | 8.055449093 | -1.882419171 | 3.52E-31    | 3.66E-30    |
| CARMIL1    | 9.38288075  | 3.42424646  | -1.454244386 | 5.31E-40    | 7.56E-38    |
| HOXB-AS3   | 5.586956483 | 0.940967277 | -2.569846125 | 6.02E-36    | 1.69E-34    |
| PLAU       | 72.7867979  | 15.84399196 | -2.199740923 | 1.85E-25    | 1.05E-24    |
| AL645939.4 | 0.05451231  | 0.512490354 | 3.232870882  | 1.20E-21    | 4.98E-21    |
| NROB2      | 12.87589489 | 1.486644849 | -3.114540763 | 9.70E-38    | 5.16E-36    |
| AC073410.1 | 0.081814345 | 0.283543684 | 1.793145292  | 3.09E-12    | 6.81E-12    |
| COL1A2     | 25.30513908 | 83.16353519 | 1.716520683  | 4.66E-16    | 1.31E-15    |
| FMNL1      | 1.03265516  | 4.96354021  | 2.265010912  | 3.33E-35    | 7.61E-34    |

Table S1. The differentially expressed genes(DEGs) were screened out in TCGA

| ID         | conMean     | treatMean   | logFC        | pValue      | FDR         |
|------------|-------------|-------------|--------------|-------------|-------------|
| WAS        | 1.768378444 | 8.080171018 | 2.191958774  | 4.20E-33    | 6.12E-32    |
| RNU6-44P   | 0.070063296 | 0.682692545 | 3.284505238  | 4.67E-09    | 8.46E-09    |
| MIR587     | 0.501192033 | 1.544078726 | 1.623310924  | 0.016673419 | 0.019524079 |
| AL162724.1 | 0.024456312 | 0.472565953 | 4.272236917  | 2.37E-28    | 1.75E-27    |
| RNU6-1016P | 0.840441776 | 3.055479543 | 1.86217904   | 1.30E-12    | 2.93E-12    |
| RNF182     | 1.334912956 | 0.560443124 | -1.252105797 | 2.81E-22    | 1.23E-21    |
| MIR4258    | 0.237018122 | 0.565134745 | 1.25359752   | 3.32E-11    | 6.85E-11    |
| AC068580.3 | 0.830549708 | 1.848468753 | 1.154192235  | 4.64E-16    | 1.30E-15    |
| AL121574.1 | 0.604693601 | 0.187214729 | -1.691510371 | 1.01E-23    | 4.96E-23    |
| AP001273.1 | 0.281378972 | 0.619303285 | 1.138131584  | 5.07E-17    | 1.52E-16    |
| AC024267.3 | 0.145109344 | 0.390901423 | 1.429664411  | 1.08E-10    | 2.16E-10    |
| ITGA2B     | 0.165621092 | 0.410019869 | 1.307807413  | 0.04173843  | 0.047373659 |
| RTP2       | 0.006550877 | 0.258093904 | 5.300064099  | 5.99E-28    | 4.24E-27    |
| BRCA2      | 0.130868212 | 0.439986619 | 1.74934494   | 2.63E-32    | 3.30E-31    |
| AC026780.2 | 0.060739253 | 0.312210993 | 2.361820254  | 3.96E-07    | 6.36E-07    |
| AC020916.1 | 3.358283921 | 12.75118897 | 1.924835665  | 9.40E-13    | 2.14E-12    |
| SLC16A1-AS | 0.065275    | 0.610393011 | 3.225135987  | 4.00E-40    | 6.14E-38    |
| NSUN5P1    | 0.627663686 | 2.109712935 | 1.748983059  | 4.72E-15    | 1.24E-14    |
| PLSCR3     | 0.094858615 | 0.289108285 | 1.607759237  | 1.77E-27    | 1.19E-26    |
| ADAMTS14   | 0.066169847 | 0.675236999 | 3.35114811   | 1.87E-30    | 1.77E-29    |
| NDUFA4L2   | 13.10351732 | 580.0550561 | 5.468163815  | 6.20E-38    | 3.55E-36    |
| SCN4A      | 0.29201623  | 0.951316624 | 1.703877033  | 1.59E-08    | 2.78E-08    |
| VSIR       | 7.326332611 | 17.01410665 | 1.215568298  | 4.72E-29    | 3.77E-28    |
| PCDH10     | 0.836712994 | 2.740933863 | 1.711862772  | 0.006529787 | 0.007899128 |
| EGFLAM     | 0.925767089 | 2.621092148 | 1.501446894  | 3.73E-16    | 1.06E-15    |
| RNU6-94P   | 0.205818528 | 0.724806525 | 1.816223084  | 1.70E-09    | 3.17E-09    |
| AC008555.1 | 0.381394983 | 0.944955228 | 1.30896011   | 3.70E-10    | 7.16E-10    |
| TOX2       | 0.931117296 | 3.140214458 | 1.753828265  | 3.74E-26    | 2.26E-25    |
| TRIM55     | 3.609656213 | 7.424757365 | 1.040482441  | 7.29E-12    | 1.57E-11    |
| DNAJB5-DT  | 0.079374046 | 0.278804003 | 1.812512018  | 6.24E-12    | 1.35E-11    |
| AL158163.2 | 0.13578472  | 0.388466221 | 1.516468012  | 8.84E-20    | 3.21E-19    |
| NFKB2      | 7.662133431 | 17.83473026 | 1.218871342  | 3.30E-27    | 2.17E-26    |
| MDM4       | 1.999776215 | 4.018825008 | 1.006935195  | 5.42E-14    | 1.33E-13    |
| AC008760.2 | 0.19677516  | 6.251811183 | 4.989654192  | 3.73E-35    | 8.40E-34    |
| TRAV3      | 0.116137831 | 0.748555373 | 2.688271044  | 5.58E-19    | 1.91E-18    |
| ARAP3      | 3.677318542 | 7.357245327 | 1.000511546  | 1.07E-15    | 2.95E-15    |
| PYGL       | 3.956743111 | 16.08835989 | 2.023631952  | 1.28E-35    | 3.25E-34    |
| AC024941.2 | 0.628825404 | 0.281462583 | -1.159716358 | 4.22E-21    | 1.69E-20    |
| CYP39A1    | 3.964899986 | 1.254855272 | -1.659763493 | 1.12E-31    | 1.25E-30    |
| SLC17A3    | 19.7777427  | 67.07067627 | 1.761804373  | 1.26E-09    | 2.36E-09    |
| IGFL2-AS1  | 0.021451053 | 0.82743995  | 5.269534234  | 2.01E-07    | 3.30E-07    |
| RN7SL809P  | 0.165499822 | 0.548611778 | 1.728955928  | 8.95E-11    | 1.80E-10    |
| SPATA18    | 3.055894821 | 10.28690348 | 1.75114198   | 3.70E-27    | 2.43E-26    |
| DPP9-AS1   | 0.027380636 | 0.253833116 | 3.212652415  | 3.88E-32    | 4.70E-31    |
| AC005261.3 | 1.385184403 | 3.062944949 | 1.144841389  | 7.04E-29    | 5.52E-28    |
| NMNAT2     | 0.24856373  | 0.783576293 | 1.656457955  | 0.000557802 | 0.000729284 |
| PCP4       | 17.94134801 | 3.034350321 | -2.563828729 | 3.64E-36    | 1.07E-34    |
| PMCH       | 0.011450176 | 0.323610897 | 4.820818461  | 5.80E-27    | 3.73E-26    |
| ETS1       | 20.11911801 | 45.90594895 | 1.190114063  | 3.37E-21    | 1.36E-20    |
| SELE       | 3.96314371  | 1.125186636 | -1.81648096  | 1.93E-14    | 4.88E-14    |
| SGO1       | 0.132327331 | 0.272646243 | 1.042919205  | 5.13E-20    | 1.89E-19    |
| TRAV4      | 0.155301446 | 1.013204457 | 2.705782163  | 1.48E-21    | 6.13E-21    |
| AC002553.2 | 0.371951738 | 1.035501346 | 1.477142084  | 8.72E-14    | 2.11E-13    |
| AC005840.1 | 0.252539177 | 0.538529978 | 1.092519442  | 1.07E-10    | 2.13E-10    |
| C1RL-AS1   | 1.378691882 | 4.238105339 | 1.620119375  | 1.84E-21    | 7.57E-21    |



Table S1. The differentially expressed genes(DEGs) were screened out in TCGA

| ID         | conMean     | treatMean   | logFC        | pValue      | FDR         |
|------------|-------------|-------------|--------------|-------------|-------------|
| ANKZF1     | 2.868032944 | 8.053115346 | 1.489485401  | 2.64E-29    | 2.17E-28    |
| OR51E1     | 0.423612902 | 2.478632567 | 2.548725986  | 2.08E-31    | 2.24E-30    |
| RNA5SP498  | 0.109179076 | 1.070315845 | 3.29326829   | 1.10E-17    | 3.45E-17    |
| PTTG1      | 0.751440964 | 3.737554144 | 2.314362809  | 2.23E-34    | 4.17E-33    |
| AC079015.1 | 0.069813338 | 0.732073011 | 3.390412942  | 1.14E-33    | 1.84E-32    |
| KNG1       | 288.1662501 | 2.998896111 | -6.586326023 | 1.30E-41    | 4.16E-39    |
| AC018410.2 | 0.078971944 | 0.347141635 | 2.136112301  | 6.72E-18    | 2.13E-17    |
| TRAV22     | 0.118260256 | 0.360959194 | 1.60987044   | 1.05E-07    | 1.74E-07    |
| HLA-DQB1   | 14.35841368 | 71.73125957 | 2.320705595  | 4.98E-30    | 4.46E-29    |
| PHKA2      | 3.605396111 | 16.81318925 | 2.221363735  | 1.61E-35    | 3.99E-34    |
| ALKBH6     | 0.208363367 | 0.68840122  | 1.724148003  | 3.06E-28    | 2.23E-27    |
| IFI44L     | 2.052316403 | 5.665500426 | 1.464950227  | 7.19E-21    | 2.82E-20    |
| SPINK5     | 0.21438913  | 0.944449288 | 2.139241573  | 1.19E-07    | 1.97E-07    |
| FAM182B    | 0.099039882 | 0.236244759 | 1.254200828  | 1.43E-16    | 4.16E-16    |
| AL096855.1 | 0.15891962  | 0.421685338 | 1.407869613  | 4.29E-12    | 9.37E-12    |
| ALDH1A3    | 7.05628835  | 2.501162224 | -1.496310884 | 1.87E-05    | 2.70E-05    |
| METTL26    | 13.5204699  | 39.33778121 | 1.540770294  | 1.25E-31    | 1.39E-30    |
| AL590648.3 | 0.154676573 | 0.409487874 | 1.404566019  | 1.24E-20    | 4.78E-20    |
| PPP1R18    | 6.110836583 | 19.19803279 | 1.651516681  | 1.73E-33    | 2.70E-32    |
| AC004836.1 | 0.1572689   | 0.663780891 | 2.077473693  | 1.10E-17    | 3.43E-17    |
| MFHAS1     | 8.761978153 | 4.139312407 | -1.08186548  | 2.33E-30    | 2.17E-29    |
| FBXO17     | 8.267283444 | 24.7774875  | 1.583544646  | 4.33E-32    | 5.19E-31    |
| TPT1P5     | 0.19946955  | 0.909946695 | 2.189613506  | 4.45E-20    | 1.65E-19    |
| TIAF1      | 0.253710764 | 0.598590365 | 1.238384328  | 1.21E-14    | 3.08E-14    |
| AC064799.1 | 0.463211335 | 0.98471745  | 1.088039268  | 3.90E-12    | 8.55E-12    |
| KCNAB3     | 0.140194601 | 0.379040695 | 1.434921955  | 1.63E-08    | 2.86E-08    |
| TOB2P1     | 0.322198734 | 0.870966898 | 1.434667066  | 2.69E-21    | 1.09E-20    |
| IFNAR2     | 2.667835708 | 5.754906838 | 1.109122749  | 2.94E-29    | 2.40E-28    |
| AP000864.1 | 0.032410171 | 0.701472455 | 4.435867925  | 1.17E-30    | 1.14E-29    |
| AL162430.1 | 0.083907732 | 0.253796347 | 1.596795646  | 3.30E-22    | 1.44E-21    |
| PARP10     | 8.04703     | 16.35611095 | 1.023301438  | 6.75E-26    | 3.97E-25    |
| RN7SKP80   | 0.170387993 | 1.158571771 | 2.765451841  | 3.31E-12    | 7.28E-12    |
| LSP1       | 2.140109313 | 10.15848706 | 2.246929158  | 4.37E-32    | 5.23E-31    |
| AC138470.1 | 0.095035199 | 0.269020731 | 1.501183493  | 3.82E-14    | 9.48E-14    |
| ATP2B2     | 0.16075763  | 1.697238912 | 3.40023054   | 9.06E-26    | 5.28E-25    |
| TRBV18     | 0.158751505 | 0.818320916 | 2.365896461  | 1.42E-18    | 4.73E-18    |
| NPIP15     | 0.394023681 | 1.349177929 | 1.77572638   | 2.18E-05    | 3.12E-05    |
| ACADSB     | 31.33014843 | 8.133489794 | -1.945605205 | 2.12E-35    | 5.09E-34    |
| LINC00460  | 0.030224813 | 0.994363976 | 5.03996869   | 1.74E-19    | 6.19E-19    |
| ECHS1      | 227.5192168 | 91.84253814 | -1.308753986 | 2.96E-25    | 1.64E-24    |
| GLYAT      | 53.81034066 | 20.01598803 | -1.426730608 | 1.37E-05    | 2.00E-05    |
| TNIP3      | 0.033819218 | 0.436745959 | 3.690879135  | 2.59E-30    | 2.40E-29    |
| AC127496.5 | 0.089695119 | 0.233194547 | 1.37843267   | 6.43E-17    | 1.91E-16    |
| AC009955.4 | 0.138058858 | 0.373451086 | 1.435635842  | 3.20E-07    | 5.17E-07    |
| LINC00106  | 0.595310683 | 2.735853403 | 2.200276237  | 1.03E-11    | 2.20E-11    |
| LIPG       | 2.432585054 | 0.981768137 | -1.309035998 | 2.55E-23    | 1.21E-22    |
| LGI2       | 6.551814993 | 0.661253716 | -3.308618789 | 1.01E-34    | 2.05E-33    |
| EFHD1      | 97.58812811 | 15.57314109 | -2.647645686 | 2.18E-40    | 3.80E-38    |
| ATP5MFP5   | 0.050273701 | 0.30215737  | 2.587424336  | 0.016047863 | 0.018810829 |
| PCDH1      | 19.62311604 | 9.759049995 | -1.007741533 | 6.88E-28    | 4.82E-27    |
| RN7SL381P  | 0.266330975 | 1.19799645  | 2.169331502  | 1.34E-07    | 2.21E-07    |
| IGHV3-43   | 1.233913283 | 4.604851501 | 1.899913624  | 8.90E-05    | 0.000122652 |
| AC068790.4 | 0.142136757 | 0.464043894 | 1.706981591  | 4.53E-12    | 9.87E-12    |
| SLC22A13   | 4.29512116  | 0.62710593  | -2.775917762 | 2.87E-14    | 7.17E-14    |
| AC093249.3 | 0.216815468 | 0.450601146 | 1.0553833    | 0.002781249 | 0.003457751 |

Table S1. The differentially expressed genes(DEGs) were screened out in TCGA

| ID         | conMean     | treatMean   | logFC        | pValue      | FDR         |
|------------|-------------|-------------|--------------|-------------|-------------|
| AC022532.1 | 0.064638127 | 0.310948939 | 2.266220401  | 2.43E-26    | 1.49E-25    |
| GCM1       | 0.656977023 | 0.173973177 | -1.916978024 | 6.21E-26    | 3.67E-25    |
| TAPBP      | 27.74980472 | 84.23953798 | 1.602019905  | 2.87E-37    | 1.28E-35    |
| ISCA1P4    | 1.175166085 | 0.464325266 | -1.339656975 | 4.40E-16    | 1.24E-15    |
| AC006369.1 | 0.068966135 | 0.404364626 | 2.551696777  | 1.10E-26    | 6.91E-26    |
| AC087379.2 | 7.33464733  | 1.378487024 | -2.411641912 | 6.60E-26    | 3.90E-25    |
| Z84480.1   | 0.063204588 | 0.237496424 | 1.909804602  | 1.84E-15    | 4.97E-15    |
| TUBAP2     | 0.109639026 | 0.248636169 | 1.181274766  | 1.40E-18    | 4.66E-18    |
| FCGR1CP    | 0.101521983 | 0.786443502 | 2.953550974  | 1.79E-32    | 2.33E-31    |
| LINC01428  | 0.190741621 | 2.727427881 | 3.837849459  | 1.82E-28    | 1.36E-27    |
| AC005845.1 | 0.088022943 | 0.232265065 | 1.399820654  | 7.47E-16    | 2.07E-15    |
| PLPP4      | 3.884623211 | 0.630034783 | -2.624271286 | 8.00E-37    | 3.05E-35    |
| TPSB2      | 1.704389531 | 5.54143091  | 1.701003463  | 2.88E-17    | 8.78E-17    |
| LINC01186  | 1.943661324 | 0.836731606 | -1.215940019 | 5.75E-07    | 9.14E-07    |
| HAUS7      | 0.456368492 | 1.733783817 | 1.925652927  | 1.16E-19    | 4.19E-19    |
| APOL1      | 25.99648115 | 107.0530704 | 2.041937914  | 5.05E-25    | 2.76E-24    |
| AL033381.1 | 0.167476934 | 0.460496965 | 1.459229231  | 0.025628088 | 0.029607266 |
| ALOX5AP    | 3.809420556 | 8.71263291  | 1.193537191  | 2.67E-15    | 7.15E-15    |
| AL033519.1 | 0.015430386 | 0.287601568 | 4.220225486  | 4.86E-11    | 9.92E-11    |
| AC007969.1 | 3.174462546 | 7.739096314 | 1.285652758  | 2.37E-15    | 6.36E-15    |
| RF00190    | 0.12979396  | 0.725270573 | 2.482296068  | 1.21E-19    | 4.33E-19    |
| TIMP1      | 73.32822694 | 291.5273354 | 1.991190605  | 5.51E-26    | 3.27E-25    |
| AC120114.3 | 0.170486944 | 0.894307293 | 2.391109377  | 4.29E-26    | 2.57E-25    |
| DGKA       | 0.815325156 | 1.795447383 | 1.138895941  | 7.12E-20    | 2.61E-19    |
| NGFR       | 2.313789089 | 8.467775684 | 1.871725689  | 9.76E-19    | 3.28E-18    |
| SLC12A1    | 255.6958626 | 0.835677082 | -8.257267531 | 4.99E-42    | 2.03E-39    |
| AC105339.5 | 0.060303246 | 0.238036236 | 1.98087364   | 1.32E-12    | 2.98E-12    |
| TRGV4      | 0.064596539 | 0.307302827 | 2.25013227   | 1.03E-20    | 3.98E-20    |
| MC1R       | 0.264908213 | 0.799431296 | 1.59348148   | 5.41E-20    | 1.99E-19    |
| PF4V1      | 0.720211486 | 2.991160317 | 2.054212723  | 8.05E-10    | 1.53E-09    |
| C1orf162   | 2.351763361 | 11.95347687 | 2.345615505  | 2.70E-34    | 4.94E-33    |
| PDIA5      | 5.542858264 | 18.6799957  | 1.752792101  | 5.34E-32    | 6.34E-31    |
| ARID5A     | 3.583940444 | 9.507311987 | 1.40749084   | 7.47E-27    | 4.76E-26    |
| SCGB1D2    | 7.228524489 | 2.573808947 | -1.489796223 | 7.06E-13    | 1.62E-12    |
| VASH1      | 2.009656497 | 9.254050724 | 2.203136079  | 1.43E-35    | 3.60E-34    |
| CCDC68     | 0.859401415 | 1.734885942 | 1.01343676   | 3.29E-09    | 6.02E-09    |
| PRDM1      | 1.253641832 | 6.253365249 | 2.318507559  | 2.00E-36    | 6.44E-35    |
| AL590666.2 | 0.486509766 | 3.37347872  | 2.793696391  | 3.37E-31    | 3.52E-30    |
| VPS9D1-AS1 | 0.229626455 | 0.75562897  | 1.718389153  | 5.67E-11    | 1.15E-10    |
| NCR3       | 0.203123655 | 0.730691176 | 1.846903528  | 4.46E-26    | 2.67E-25    |
| FAM171A2   | 0.981014417 | 0.461319659 | -1.088507564 | 1.28E-13    | 3.07E-13    |
| KLF7-IT1   | 0.193726489 | 0.493576922 | 1.349253711  | 3.54E-05    | 5.00E-05    |
| NIPA2P1    | 0.003460519 | 0.345481324 | 6.641475592  | 5.94E-30    | 5.26E-29    |
| FLT1       | 11.79856785 | 45.57086422 | 1.94949998   | 7.10E-25    | 3.83E-24    |
| COL1A1     | 16.98836258 | 114.9473076 | 2.758353964  | 2.10E-23    | 1.01E-22    |
| AL391422.4 | 1.363021236 | 3.392335316 | 1.315470741  | 3.98E-29    | 3.21E-28    |
| AC020558.2 | 0.191130927 | 0.566317682 | 1.567050336  | 9.48E-12    | 2.03E-11    |
| ADAMTS2    | 1.123038863 | 4.229426687 | 1.913054262  | 2.35E-25    | 1.32E-24    |
| AC103810.3 | 0.566058615 | 2.473615909 | 2.127598146  | 2.42E-16    | 6.91E-16    |
| TRAV21     | 0.168999613 | 1.258429278 | 2.896532294  | 1.19E-21    | 4.95E-21    |
| POLE2      | 0.295709241 | 0.760690455 | 1.363130173  | 2.61E-31    | 2.76E-30    |
| MIR31HG    | 0.81821282  | 0.312817315 | -1.387155772 | 2.45E-17    | 7.50E-17    |
| EPHB3      | 2.862107953 | 1.33623825  | -1.098900827 | 9.20E-12    | 1.97E-11    |
| AC119674.1 | 0.106076697 | 0.295813789 | 1.479581547  | 4.28E-19    | 1.48E-18    |
| CDH4       | 0.253601562 | 4.342345418 | 4.097838956  | 2.22E-18    | 7.28E-18    |

Table S1. The differentially expressed genes(DEGs) were screened out in TCGA

| ID         | conMean     | treatMean   | logFC        | pValue      | FDR         |
|------------|-------------|-------------|--------------|-------------|-------------|
| IGLV3-19   | 14.18982428 | 123.4008551 | 3.120423763  | 7.61E-07    | 1.20E-06    |
| APLN       | 6.064477011 | 33.99312623 | 2.486787907  | 5.53E-33    | 7.87E-32    |
| NRBP2      | 3.968318847 | 11.25848348 | 1.504412656  | 2.68E-24    | 1.37E-23    |
| DOK2       | 1.319769275 | 4.914704685 | 1.896818994  | 1.54E-29    | 1.30E-28    |
| UCN        | 0.219488887 | 1.32043169  | 2.588789867  | 5.39E-33    | 7.70E-32    |
| NKAIN1     | 0.087297619 | 0.902048153 | 3.369190245  | 5.32E-31    | 5.40E-30    |
| AL135999.1 | 0.211246046 | 0.893068678 | 2.079846786  | 7.64E-17    | 2.25E-16    |
| SLC7A11    | 0.114650648 | 0.388249872 | 1.759740939  | 1.52E-25    | 8.69E-25    |
| SLC25A33   | 4.438026464 | 1.33797974  | -1.729862    | 3.22E-38    | 2.05E-36    |
| AL671277.2 | 0.466013775 | 1.742432827 | 1.902658535  | 9.77E-27    | 6.17E-26    |
| AC092017.1 | 0.341971666 | 0.733584126 | 1.101085623  | 1.77E-08    | 3.09E-08    |
| AL445222.1 | 0.2085552   | 0.730726383 | 1.808902016  | 3.59E-29    | 2.90E-28    |
| AC002550.2 | 0.412610028 | 0.988443296 | 1.260379321  | 1.49E-18    | 4.95E-18    |
| AP001351.1 | 0.070871625 | 0.25333622  | 1.837773328  | 3.33E-25    | 1.85E-24    |
| AL355877.1 | 1.902548204 | 0.437114804 | -2.121848862 | 1.20E-37    | 6.14E-36    |
| ANKRD9     | 4.677594694 | 2.007749958 | -1.220187251 | 4.45E-30    | 4.00E-29    |
| MEGF11     | 0.410981206 | 0.861106794 | 1.067119748  | 1.29E-07    | 2.13E-07    |
| CCL11      | 2.321754935 | 0.411467152 | -2.496366534 | 4.10E-28    | 2.95E-27    |
| AC003072.1 | 1.326956728 | 3.043336402 | 1.197532489  | 1.00E-18    | 3.36E-18    |
| APOBEC3F   | 1.222887569 | 2.648046756 | 1.114636825  | 3.68E-30    | 3.36E-29    |
| AC068051.1 | 0.054396318 | 0.348146862 | 2.67811512   | 5.73E-15    | 1.50E-14    |
| ACSL6      | 0.78189695  | 0.181689791 | -2.10550112  | 9.22E-34    | 1.53E-32    |
| LOX        | 5.912242657 | 63.54692831 | 3.426045002  | 3.63E-31    | 3.77E-30    |
| GMDS       | 6.360934319 | 3.142846245 | -1.017166996 | 8.07E-32    | 9.26E-31    |
| MCF2L      | 1.440241615 | 3.336591008 | 1.212063996  | 7.36E-20    | 2.69E-19    |
| PODXL      | 118.0175738 | 48.69259505 | -1.277227409 | 4.80E-13    | 1.12E-12    |
| AC099568.2 | 1.935018079 | 0.578785479 | -1.741246413 | 1.59E-28    | 1.19E-27    |
| RAPGEF3    | 7.533435167 | 2.285044075 | -1.721085876 | 1.67E-36    | 5.54E-35    |
| PIP5K1B    | 3.304663321 | 1.041505637 | -1.665832649 | 6.40E-33    | 8.98E-32    |
| IFITM9P    | 0.122924958 | 0.422544545 | 1.781325575  | 1.59E-09    | 2.97E-09    |
| APBB1IP    | 2.817833142 | 15.2176924  | 2.433091516  | 4.33E-32    | 5.19E-31    |
| GATA3      | 25.44814668 | 2.867507597 | -3.149691379 | 4.57E-39    | 3.94E-37    |
| AC105910.1 | 0.009541414 | 0.271886951 | 4.832660035  | 1.42E-14    | 3.63E-14    |
| DENND1B    | 2.978026556 | 1.436179221 | -1.052120824 | 2.20E-30    | 2.06E-29    |
| RNU6-341P  | 0.1373297   | 0.655321074 | 2.25455826   | 3.26E-06    | 4.94E-06    |
| AL031709.1 | 0.140392904 | 0.540365565 | 1.944465719  | 5.01E-15    | 1.32E-14    |
| SNORA70F   | 0.994048033 | 0.396280515 | -1.326793534 | 3.80E-19    | 1.32E-18    |
| AC243962.1 | 0.028647656 | 0.321506163 | 3.488357402  | 1.26E-30    | 1.22E-29    |
| AC084036.1 | 1.959146381 | 3.954125661 | 1.013133526  | 7.57E-09    | 1.36E-08    |
| AFF2       | 0.107304963 | 0.248794359 | 1.213236974  | 7.83E-15    | 2.03E-14    |
| LOXL1-AS1  | 2.236166771 | 1.11315472  | -1.006373656 | 3.97E-21    | 1.59E-20    |
| HMGNS      | 5.817919583 | 2.718307554 | -1.097794661 | 2.14E-36    | 6.82E-35    |
| AC007993.2 | 2.418381238 | 0.043957725 | -5.781781148 | 1.79E-48    | 1.76E-45    |
| AC004890.2 | 0.180973627 | 0.613974307 | 1.762398815  | 2.84E-10    | 5.53E-10    |
| AC114744.1 | 0.103398094 | 0.268332497 | 1.375812199  | 1.07E-12    | 2.42E-12    |
| AL591806.2 | 0.10056994  | 0.363560618 | 1.853996777  | 3.09E-08    | 5.33E-08    |
| CLDN16     | 29.83053597 | 0.535628503 | -5.799413355 | 1.22E-41    | 4.10E-39    |
| COL21A1    | 0.430954178 | 2.071087579 | 2.264782176  | 1.12E-18    | 3.75E-18    |
| AC020978.3 | 0.139303573 | 0.588476248 | 2.078751925  | 2.66E-16    | 7.58E-16    |
| AP000695.1 | 0.582864603 | 1.556323916 | 1.416909664  | 1.64E-12    | 3.67E-12    |
| MMP25-AS1  | 0.31537941  | 1.680744971 | 2.413940454  | 8.09E-36    | 2.19E-34    |
| SORCS3     | 0.355196651 | 3.352937965 | 3.238735906  | 0.004895646 | 0.005976374 |
| TMEM200A   | 3.30866263  | 8.516555809 | 1.364021913  | 2.17E-19    | 7.67E-19    |
| AC009078.3 | 0.097151716 | 0.250753243 | 1.367956969  | 3.76E-09    | 6.86E-09    |
| PXDN       | 4.119729611 | 13.12571666 | 1.671774637  | 7.10E-25    | 3.83E-24    |

Table S1. The differentially expressed genes(DEGs) were screened out in TCGA

| ID         | conMean     | treatMean   | logFC        | pValue   | FDR      |
|------------|-------------|-------------|--------------|----------|----------|
| LCN2       | 8.599858558 | 3.208513648 | -1.422407812 | 8.73E-21 | 3.41E-20 |
| AL662844.3 | 0.115057083 | 0.989206459 | 3.103921859  | 2.20E-28 | 1.63E-27 |
| ANGPTL2    | 9.848470819 | 25.9743834  | 1.399117863  | 6.80E-18 | 2.15E-17 |
| ZNF37CP    | 0.181999683 | 2.785514859 | 3.935936167  | 4.04E-31 | 4.17E-30 |
| KIAA1211   | 0.580439959 | 0.246338163 | -1.236506694 | 3.57E-20 | 1.33E-19 |
| SLC6A13    | 18.22763463 | 39.93324295 | 1.13146288   | 3.75E-07 | 6.04E-07 |
| ANK3       | 7.225486125 | 2.985830338 | -1.274962464 | 9.90E-31 | 9.73E-30 |
| AC016831.4 | 0.019025655 | 0.36144352  | 4.247752196  | 3.09E-06 | 4.69E-06 |
| LOXL4      | 8.232749111 | 3.631325794 | -1.18087789  | 4.37E-11 | 8.94E-11 |
| AC022144.1 | 1.099055503 | 5.979006996 | 2.443641654  | 1.59E-28 | 1.19E-27 |
| AL049840.1 | 0.645291486 | 1.845984376 | 1.516367448  | 2.55E-12 | 5.66E-12 |
| LGR6       | 0.632048805 | 0.210063396 | -1.589211175 | 7.28E-19 | 2.47E-18 |
| RNU1-47P   | 0.086700914 | 0.819308348 | 3.240287401  | 2.82E-19 | 9.84E-19 |
| AC018521.5 | 1.243988728 | 0.579176101 | -1.102899435 | 2.72E-32 | 3.39E-31 |
| CALCA      | 8.634989161 | 1.194736171 | -2.853502298 | 2.69E-38 | 1.76E-36 |
| FAM43B     | 1.165653957 | 0.373494866 | -1.641979246 | 1.72E-21 | 7.09E-21 |
| INSYN1     | 2.05563104  | 0.839966485 | -1.291177672 | 3.60E-31 | 3.74E-30 |
| AL031727.1 | 1.033221788 | 2.818616319 | 1.447837135  | 6.27E-18 | 1.99E-17 |
| NCKAP1L    | 1.048964601 | 5.351423428 | 2.350956693  | 7.42E-32 | 8.58E-31 |
| MIR6797    | 0.123608046 | 0.75477466  | 2.610273334  | 7.58E-17 | 2.24E-16 |
| IGHG1      | 45.43358152 | 363.3513878 | 2.999534474  | 4.06E-07 | 6.52E-07 |
| SLC20A2    | 12.20490826 | 4.655861438 | -1.390341423 | 1.44E-38 | 1.01E-36 |
| TM4SF19    | 0.02969557  | 0.285459178 | 3.264964797  | 4.11E-24 | 2.07E-23 |
| COL5A3     | 0.538646386 | 6.329459402 | 3.554671905  | 7.68E-40 | 1.01E-37 |
| DDC        | 63.70149566 | 20.87503853 | -1.609548386 | 1.80E-05 | 2.60E-05 |
| ITGA4      | 1.272222754 | 4.459601974 | 1.809563658  | 5.48E-25 | 2.98E-24 |
| AC011611.3 | 0.03887101  | 0.221581098 | 2.511068308  | 2.43E-14 | 6.11E-14 |
| BDH1       | 3.506545168 | 0.941491531 | -1.897030289 | 5.52E-34 | 9.52E-33 |
| RNU6-35P   | 0.6739363   | 0.240979897 | -1.483699438 | 1.33E-20 | 5.13E-20 |
| ENTPD3-AS1 | 2.166550347 | 0.990115086 | -1.129731632 | 5.77E-33 | 8.16E-32 |
| LINC01480  | 0.101911092 | 0.678030913 | 2.734039975  | 1.08E-30 | 1.05E-29 |
| ADSSL1     | 2.430510576 | 13.95030413 | 2.520965258  | 4.48E-21 | 1.79E-20 |
| TLCD1      | 6.521000056 | 2.605691959 | -1.323426691 | 3.95E-29 | 3.18E-28 |
| AC016769.3 | 0.031979412 | 0.604939504 | 4.24157554   | 1.48E-18 | 4.93E-18 |
| AC008060.1 | 0.00221274  | 0.27821923  | 6.974244306  | 2.17E-12 | 4.84E-12 |
| STOX1      | 1.882333121 | 0.567703606 | -1.729312156 | 6.23E-31 | 6.26E-30 |
| DDB2       | 2.728486625 | 11.14791891 | 2.030601536  | 1.72E-40 | 3.24E-38 |
| LINC01693  | 0.057528593 | 0.23535881  | 2.032510761  | 8.80E-09 | 1.57E-08 |
| AP000941.1 | 0.154207844 | 0.396861335 | 1.363758862  | 2.63E-09 | 4.85E-09 |
| SORT1      | 37.95197806 | 13.23821091 | -1.51946692  | 9.04E-39 | 6.89E-37 |
| GLDC       | 16.88547622 | 3.381029429 | -2.320248389 | 2.37E-36 | 7.41E-35 |
| EMX1       | 14.03607081 | 2.292337375 | -2.614247837 | 9.41E-41 | 2.16E-38 |
| TUBB6      | 7.763664708 | 17.16056881 | 1.144287656  | 9.14E-24 | 4.48E-23 |
| CRP        | 0.039230023 | 4.083626221 | 6.701748816  | 5.53E-10 | 1.06E-09 |
| UPP2       | 9.156492904 | 0.480300644 | -4.252785479 | 7.74E-29 | 6.03E-28 |
| HLA-B      | 290.8432708 | 1113.972107 | 1.937399279  | 1.20E-39 | 1.42E-37 |
| DPEP1      | 84.10286769 | 4.305901897 | -4.287767638 | 3.23E-23 | 1.52E-22 |
| PRDX4      | 19.73624175 | 52.36921108 | 1.407871579  | 2.61E-36 | 8.08E-35 |
| C1orf54    | 4.916049013 | 10.35624053 | 1.074929174  | 2.10E-23 | 1.01E-22 |
| AC010999.1 | 0.081502844 | 0.255947326 | 1.650924632  | 2.02E-13 | 4.78E-13 |
| RN7SL138P  | 0.738028744 | 3.747057668 | 2.344009269  | 1.82E-36 | 5.95E-35 |
| CCDC142    | 0.730609724 | 1.585522314 | 1.117785322  | 1.73E-28 | 1.30E-27 |
| AP000344.1 | 1.008316956 | 0.21050915  | -2.259994364 | 4.99E-18 | 1.59E-17 |
| AL022238.1 | 0.039723908 | 0.223010223 | 2.489030391  | 3.48E-10 | 6.75E-10 |
| VKORC1     | 13.38587731 | 29.04751399 | 1.117703001  | 5.19E-30 | 4.63E-29 |

Table S1. The differentially expressed genes(DEGs) were screened out in TCGA

| ID         | conMean     | treatMean   | logFC        | pValue      | FDR         |
|------------|-------------|-------------|--------------|-------------|-------------|
| AL161935.3 | 0.235629934 | 0.933232814 | 1.985714208  | 7.29E-29    | 5.70E-28    |
| CD5        | 0.624199294 | 2.728489097 | 2.128023648  | 3.32E-26    | 2.01E-25    |
| PLEKHS1    | 0.458023357 | 0.210195094 | -1.12369217  | 4.97E-08    | 8.45E-08    |
| NOS1       | 1.580688498 | 0.08064948  | -4.292744047 | 1.54E-29    | 1.30E-28    |
| RPS20P15   | 0.026550539 | 0.821642444 | 4.951697653  | 0.000101674 | 0.00013971  |
| PPM1F      | 3.499926667 | 7.31964063  | 1.064448125  | 2.33E-27    | 1.55E-26    |
| SNORD83A   | 0.189347022 | 0.870061088 | 2.200083965  | 2.08E-12    | 4.64E-12    |
| EXOC3L4    | 0.918692661 | 4.06288031  | 2.144848655  | 1.48E-24    | 7.79E-24    |
| AL118508.4 | 0.116447827 | 0.29619961  | 1.346886023  | 1.66E-14    | 4.22E-14    |
| HLA-H      | 17.05623982 | 57.10324799 | 1.743273179  | 2.33E-32    | 2.96E-31    |
| AC011458.2 | 0.085787909 | 0.230567063 | 1.426340197  | 8.14E-08    | 1.37E-07    |
| GPR35      | 0.293800333 | 1.599365655 | 2.444591878  | 2.90E-16    | 8.24E-16    |
| HMGB3P10   | 0.095591667 | 0.263028429 | 1.460261969  | 1.18E-12    | 2.67E-12    |
| SNORD100   | 0.687117465 | 2.078739601 | 1.597080387  | 1.37E-09    | 2.57E-09    |
| NOL12      | 0.581369131 | 1.226715821 | 1.077274701  | 2.32E-21    | 9.47E-21    |
| NDNF       | 23.21243953 | 4.446979875 | -2.384000371 | 1.09E-28    | 8.35E-28    |
| KCNF1      | 0.373770963 | 1.106831103 | 1.566208689  | 1.10E-06    | 1.71E-06    |
| AC022509.4 | 0.096918171 | 0.241580671 | 1.317665936  | 2.18E-10    | 4.28E-10    |
| GJB2       | 5.232077065 | 13.06994102 | 1.320796935  | 7.03E-06    | 1.04E-05    |
| LINC01556  | 0.111325828 | 0.371889196 | 1.740084489  | 3.14E-12    | 6.92E-12    |
| AL157392.4 | 0.134044345 | 0.56613771  | 2.078442663  | 1.63E-15    | 4.41E-15    |
| AC100854.1 | 0.359447124 | 1.105694727 | 1.621101658  | 2.35E-25    | 1.32E-24    |
| TPPP3      | 7.410807617 | 14.82996417 | 1.000812433  | 6.46E-11    | 1.31E-10    |
| RPL37P1    | 0.019256936 | 0.229082903 | 3.572419703  | 8.39E-17    | 2.47E-16    |
| SOX11      | 0.017447551 | 0.749261977 | 5.424373749  | 2.94E-38    | 1.90E-36    |
| GYG2       | 1.261204424 | 0.542807894 | -1.216288528 | 6.89E-24    | 3.41E-23    |
| TBC1D4     | 23.52759981 | 8.556760379 | -1.459217554 | 1.62E-35    | 4.02E-34    |
| AC104964.3 | 0.191484267 | 0.818304624 | 2.095412145  | 2.36E-17    | 7.21E-17    |
| DTL        | 0.312437717 | 1.368807148 | 2.131278668  | 1.10E-33    | 1.78E-32    |
| AC008870.2 | 0.14045925  | 0.60869582  | 2.11556982   | 5.25E-22    | 2.25E-21    |
| CYSLTR1    | 0.476301081 | 1.090941784 | 1.195628388  | 7.06E-18    | 2.23E-17    |
| CALHM6     | 1.536161393 | 12.14379716 | 2.982817896  | 2.78E-33    | 4.17E-32    |
| CLCN5      | 20.84059503 | 8.099722102 | -1.363452153 | 2.87E-28    | 2.10E-27    |
| BAIAP3     | 3.294646683 | 1.515653396 | -1.120183887 | 1.99E-25    | 1.12E-24    |
| LINC00240  | 0.186624332 | 0.698194921 | 1.903492763  | 1.00E-26    | 6.32E-26    |
| LMTK3      | 1.428098524 | 0.498654714 | -1.51798242  | 3.99E-21    | 1.60E-20    |
| IGHV1-18   | 8.956996947 | 55.70513736 | 2.636723366  | 2.05E-06    | 3.15E-06    |
| IGLC6      | 0.119058536 | 0.601370793 | 2.336583745  | 3.22E-05    | 4.57E-05    |
| TMEM92-AS1 | 0.063029065 | 0.48206275  | 2.935131793  | 7.00E-24    | 3.46E-23    |
| PRELID1P4  | 0.152574175 | 0.382150667 | 1.324630759  | 2.68E-17    | 8.18E-17    |
| AC004241.3 | 0.600067369 | 0.27971225  | -1.101181042 | 1.54E-25    | 8.81E-25    |
| TRIM46     | 0.131881852 | 0.508832042 | 1.947943472  | 1.05E-18    | 3.53E-18    |
| ZC3H12D    | 0.172030263 | 0.535988113 | 1.63953862   | 4.32E-22    | 1.86E-21    |
| CCDC78     | 0.077735483 | 0.538048185 | 2.791090193  | 5.72E-14    | 1.40E-13    |
| GLYATL2    | 0.316180022 | 0.834083822 | 1.399446164  | 5.45E-13    | 1.26E-12    |
| TNFAIP3    | 6.156998153 | 15.3819319  | 1.320937669  | 3.51E-25    | 1.94E-24    |
| IGLV2-23   | 14.18486224 | 75.80777859 | 2.417993751  | 1.19E-06    | 1.85E-06    |
| PKMYT1     | 0.087302557 | 0.527427126 | 2.594875966  | 1.84E-35    | 4.49E-34    |
| CASP12     | 0.302154394 | 0.719462187 | 1.251632943  | 4.62E-09    | 8.38E-09    |
| AC133552.5 | 3.985295065 | 1.805599424 | -1.14220868  | 1.85E-25    | 1.05E-24    |
| ACO1       | 25.11522347 | 12.09053945 | -1.054683497 | 1.86E-24    | 9.68E-24    |
| FLRT2      | 0.387488169 | 0.180849168 | -1.099365296 | 1.45E-17    | 4.50E-17    |
| AC005586.2 | 0.276198374 | 0.554670749 | 1.005926816  | 0.041099781 | 0.046675181 |
| GRHL1      | 1.034578497 | 0.404817668 | -1.353698949 | 3.77E-29    | 3.04E-28    |
| AC007292.1 | 0.441183501 | 0.99714951  | 1.176430994  | 2.88E-13    | 6.78E-13    |

Table S1. The differentially expressed genes(DEGs) were screened out in TCGA

| ID         | conMean     | treatMean   | logFC        | pValue      | FDR         |
|------------|-------------|-------------|--------------|-------------|-------------|
| SLC34A3    | 7.508846262 | 0.772720889 | -3.28057195  | 1.38E-08    | 2.43E-08    |
| MPEG1      | 6.038608163 | 15.38146585 | 1.348905032  | 1.33E-18    | 4.43E-18    |
| SOWAHB     | 6.960876361 | 2.842061975 | -1.292330935 | 5.32E-27    | 3.43E-26    |
| PWWP2B     | 5.537118681 | 2.734881967 | -1.017656874 | 5.56E-21    | 2.20E-20    |
| TMEM164    | 11.35632103 | 4.023300171 | -1.497044254 | 1.44E-39    | 1.66E-37    |
| HRH2       | 0.92316926  | 7.033842333 | 2.929645906  | 2.68E-25    | 1.50E-24    |
| SLC39A4    | 7.309359653 | 2.503666145 | -1.545702826 | 5.69E-31    | 5.75E-30    |
| AC007743.1 | 0.341307518 | 0.955309994 | 1.484896764  | 3.06E-16    | 8.68E-16    |
| VIM        | 109.0103189 | 639.5199219 | 2.552524595  | 4.86E-37    | 2.00E-35    |
| HOXD13     | 0.026006922 | 0.258126209 | 3.311109087  | 2.32E-27    | 1.55E-26    |
| SCGB2A1    | 2.459267677 | 0.520661085 | -2.239812285 | 1.97E-27    | 1.32E-26    |
| AC010333.1 | 0.122505248 | 0.2948617   | 1.267194884  | 0.025695602 | 0.029680265 |
| ACSL4      | 37.34497875 | 13.09191682 | -1.512237936 | 2.99E-38    | 1.92E-36    |
| ANKRD29    | 1.173588663 | 2.455627122 | 1.06516467   | 2.80E-17    | 8.52E-17    |
| ADTRP      | 3.606491113 | 1.116644583 | -1.691425805 | 8.97E-31    | 8.84E-30    |
| BAAT       | 0.092684061 | 4.417637677 | 5.574810024  | 2.55E-11    | 5.29E-11    |
| NNMT       | 18.31632946 | 268.4626517 | 3.87351907   | 9.25E-36    | 2.47E-34    |
| SNORD60    | 0.165953001 | 1.068878575 | 2.687251344  | 4.97E-17    | 1.49E-16    |
| AC027796.4 | 0.224249392 | 1.066627439 | 2.249880365  | 1.74E-17    | 5.35E-17    |
| POLR3B     | 4.618367056 | 1.981166385 | -1.221032791 | 5.94E-37    | 2.35E-35    |
| AP005432.2 | 13.71497378 | 0.141972591 | -6.593995623 | 1.25E-41    | 4.15E-39    |
| AC006026.3 | 2.111253449 | 0.707639774 | -1.577012735 | 2.55E-24    | 1.31E-23    |
| AC093458.1 | 0.107254215 | 0.231580698 | 1.110480659  | 0.000131423 | 0.000179462 |
| LINC00865  | 0.690019631 | 0.324000456 | -1.090641565 | 4.94E-14    | 1.21E-13    |
| AC107959.3 | 0.290349772 | 0.978538707 | 1.752837017  | 1.88E-16    | 5.42E-16    |
| AC026403.1 | 1.777309651 | 6.045366115 | 1.766134657  | 3.95E-17    | 1.19E-16    |
| AL133406.2 | 0.080592015 | 0.300502303 | 1.898667235  | 9.32E-22    | 3.91E-21    |
| ADAMTS7    | 0.340721421 | 1.895045366 | 2.475567829  | 2.91E-36    | 8.83E-35    |
| FRAS1      | 5.967982806 | 2.560852492 | -1.220619225 | 1.16E-27    | 7.97E-27    |
| MIR3657    | 0.0774727   | 0.288102633 | 1.894822921  | 1.08E-06    | 1.68E-06    |
| HEY2       | 2.067680793 | 5.174990201 | 1.32354265   | 3.24E-18    | 1.05E-17    |
| RAD51      | 0.275551534 | 0.835361447 | 1.600078402  | 7.68E-32    | 8.84E-31    |
| IGHE       | 0.09999659  | 0.353360308 | 1.821189196  | 0.002436529 | 0.003043702 |
| RF02126    | 0.124039694 | 0.303265945 | 1.289781626  | 0.00088134  | 0.001138476 |
| RN7SL118P  | 0.029090063 | 0.240621454 | 3.048166972  | 8.78E-10    | 1.66E-09    |
| ACAD11     | 0.706895113 | 1.668150987 | 1.238681803  | 4.26E-09    | 7.74E-09    |
| CYTH4      | 1.108724722 | 4.447694386 | 2.004156447  | 9.32E-33    | 1.27E-31    |
| HLA-DPB1   | 44.02344333 | 186.7294374 | 2.084605486  | 7.30E-32    | 8.46E-31    |
| FOXL1      | 0.652856172 | 1.344571145 | 1.042308996  | 2.23E-11    | 4.67E-11    |
| MRNIP      | 1.38076694  | 3.261979997 | 1.240278108  | 2.67E-18    | 8.68E-18    |
| GZMM       | 0.599017491 | 2.540450229 | 2.084414166  | 2.72E-28    | 1.99E-27    |
| COX4I2     | 2.715824143 | 19.34008474 | 2.832132147  | 3.65E-30    | 3.34E-29    |
| AC012645.3 | 0.047133073 | 0.428087156 | 3.183092906  | 1.21E-29    | 1.04E-28    |
| SLC27A3    | 2.442062149 | 6.898973392 | 1.49828178   | 8.14E-32    | 9.33E-31    |
| TRPA1      | 0.12684434  | 1.177720178 | 3.214865746  | 9.75E-32    | 1.10E-30    |
| AL157871.5 | 0.134547868 | 0.344312933 | 1.35560084   | 1.22E-07    | 2.02E-07    |
| AC105339.3 | 0.067399108 | 0.245551122 | 1.865222006  | 9.69E-10    | 1.83E-09    |
| ST3GAL4    | 15.43631657 | 6.453408047 | -1.258195382 | 7.10E-25    | 3.83E-24    |
| SCARNA8    | 0.054421215 | 0.543763665 | 3.320738681  | 1.54E-13    | 3.68E-13    |
| PLPPR1     | 8.164899235 | 0.404576817 | -4.334949524 | 1.44E-38    | 1.01E-36    |
| PIWIL4     | 0.348006944 | 0.889854624 | 1.354453566  | 2.59E-23    | 1.23E-22    |
| TCN1       | 0.076218819 | 0.681919131 | 3.161381508  | 0.000101671 | 0.00013971  |
| AC007991.2 | 0.043205717 | 1.357644529 | 4.973739767  | 2.21E-23    | 1.06E-22    |
| COL4A2-AS1 | 0.140709301 | 0.553167068 | 1.974997574  | 1.78E-16    | 5.14E-16    |
| ATP5MC1P4  | 0.079867404 | 0.33561703  | 2.071137203  | 3.57E-17    | 1.08E-16    |

Table S1. The differentially expressed genes(DEGs) were screened out in TCGA

| ID         | conMean     | treatMean   | logFC        | pValue      | FDR         |
|------------|-------------|-------------|--------------|-------------|-------------|
| KCNJ12     | 1.966168072 | 0.39195177  | -2.326638607 | 9.35E-35    | 1.91E-33    |
| RNU6-856P  | 0.195576228 | 0.438957347 | 1.166349741  | 0.000968959 | 0.001247665 |
| MSI2       | 8.722535319 | 4.260062175 | -1.033873048 | 2.86E-33    | 4.26E-32    |
| AC018529.1 | 0.141920327 | 0.292409824 | 1.042910546  | 2.56E-05    | 3.66E-05    |
| AC019181.1 | 1.40129884  | 0.569945204 | -1.297869531 | 1.12E-22    | 5.03E-22    |
| PLXDC1     | 0.79305821  | 5.88724404  | 2.892093764  | 6.26E-38    | 3.57E-36    |
| FCGR1A     | 0.358387101 | 3.044816572 | 3.0867647    | 2.66E-36    | 8.19E-35    |
| CD40LG     | 0.375650774 | 1.065211627 | 1.503676102  | 2.32E-18    | 7.59E-18    |
| LINC02015  | 0.355904689 | 2.235593755 | 2.651095206  | 4.83E-19    | 1.66E-18    |
| LINC01176  | 0.548287228 | 2.119976966 | 1.951044818  | 2.84E-21    | 1.15E-20    |
| PPP1R3B    | 8.881540542 | 22.10895908 | 1.315749258  | 4.54E-28    | 3.25E-27    |
| MIR6730    | 0.183237918 | 0.671382605 | 1.873417083  | 7.99E-11    | 1.61E-10    |
| AC005082.1 | 6.499592926 | 0.791732799 | -3.037263841 | 1.00E-34    | 2.04E-33    |
| PLEKHO2    | 9.279880028 | 19.24005386 | 1.051934779  | 2.53E-25    | 1.41E-24    |
| AC079380.1 | 0.052990525 | 0.233624699 | 2.140386476  | 8.99E-18    | 2.82E-17    |
| IGKV3-11   | 16.25485653 | 79.24572673 | 2.285462318  | 1.83E-06    | 2.82E-06    |
| PCDHB8     | 0.329667093 | 0.702360535 | 1.091201899  | 0.000267719 | 0.00035798  |
| HIST1H3E   | 0.921124033 | 2.126286268 | 1.206868505  | 2.07E-08    | 3.61E-08    |
| C5orf67    | 1.976399426 | 0.30011945  | -2.719265817 | 2.85E-28    | 2.09E-27    |
| AL031710.1 | 10.23423708 | 1.697657815 | -2.59178596  | 5.68E-33    | 8.03E-32    |
| AC090197.1 | 0.111106422 | 0.503296887 | 2.179467472  | 7.57E-35    | 1.58E-33    |
| MYEOV      | 0.056720445 | 7.543812285 | 7.055281122  | 6.10E-37    | 2.41E-35    |
| HIST1H3H   | 0.456986592 | 2.772094947 | 2.600752931  | 5.64E-21    | 2.23E-20    |
| GRAMD4     | 5.542686083 | 18.89700809 | 1.769500629  | 7.19E-30    | 6.29E-29    |
| BATF       | 0.477197401 | 3.853560308 | 3.01353388   | 6.08E-34    | 1.04E-32    |
| AL357992.1 | 0.093405572 | 0.412875497 | 2.144126282  | 2.80E-07    | 4.53E-07    |
| SLC2A3     | 5.570609986 | 22.7955221  | 2.032843235  | 1.51E-26    | 9.42E-26    |
| FAP        | 0.453600052 | 1.00200623  | 1.143398766  | 1.14E-14    | 2.92E-14    |
| SLC12A3    | 73.30503179 | 2.99324404  | -4.614130419 | 9.91E-38    | 5.25E-36    |
| LINC01160  | 0.086834663 | 0.226275262 | 1.381735901  | 1.33E-11    | 2.81E-11    |
| AC012645.4 | 0.058530354 | 0.338718391 | 2.532829414  | 1.68E-17    | 5.19E-17    |
| SARDH      | 4.996210983 | 2.202010597 | -1.182012989 | 5.11E-08    | 8.69E-08    |
| AC015849.3 | 0.466717133 | 1.71093629  | 1.874165705  | 3.75E-20    | 1.40E-19    |
| AP001107.8 | 0.065399632 | 0.397667216 | 2.6042072    | 1.52E-12    | 3.41E-12    |
| ANGPTL7    | 0.444157062 | 0.212461096 | -1.063871234 | 2.38E-13    | 5.63E-13    |
| PLCB2      | 0.808865414 | 3.622450668 | 2.162994463  | 4.12E-31    | 4.25E-30    |
| AC100823.1 | 0.237025927 | 0.625845801 | 1.400762366  | 0.00037971  | 0.00050215  |
| GMIP       | 1.874372654 | 5.701016745 | 1.604811427  | 7.66E-33    | 1.06E-31    |
| ARRDC5     | 0.025069434 | 0.36263952  | 3.854534831  | 1.69E-34    | 3.25E-33    |
| HP         | 0.15478228  | 22.07178204 | 7.155818989  | 0.000889275 | 0.00114794  |
| CYS1       | 128.2017628 | 30.65217619 | -2.064354691 | 2.56E-40    | 4.21E-38    |
| SH3GL1P1   | 0.054448781 | 0.310310922 | 2.510742822  | 1.56E-30    | 1.49E-29    |
| RNU4-5P    | 0.04106436  | 0.239023358 | 2.54119288   | 1.37E-12    | 3.08E-12    |
| AC092295.2 | 1.515496647 | 0.736782978 | -1.040479024 | 1.53E-30    | 1.46E-29    |
| AL356056.3 | 0.499036514 | 0.248037455 | -1.008587388 | 4.21E-15    | 1.11E-14    |
| AC003070.1 | 0.283998638 | 1.390484124 | 2.291631357  | 2.55E-23    | 1.21E-22    |
| SIGLEC10   | 0.588047027 | 4.743193466 | 3.011855275  | 6.32E-37    | 2.48E-35    |
| AGPAT4-IT1 | 0.126485266 | 0.255233265 | 1.012847036  | 5.08E-06    | 7.60E-06    |
| PRSS36     | 0.270068699 | 0.565108794 | 1.0652022    | 1.45E-23    | 7.02E-23    |
| AL359853.1 | 0.033341461 | 0.342614162 | 3.361195576  | 3.98E-30    | 3.61E-29    |
| PLP2       | 32.88957722 | 70.38799593 | 1.097698947  | 2.30E-13    | 5.43E-13    |
| NPM2       | 1.706402461 | 0.806504866 | -1.081202808 | 2.18E-23    | 1.04E-22    |
| KAAG1      | 0.779391489 | 0.376125563 | -1.051133818 | 8.56E-21    | 3.34E-20    |
| LGALS12    | 0.207157898 | 2.365075111 | 3.513083275  | 3.24E-24    | 1.65E-23    |
| P2RX7      | 0.568997307 | 3.722196398 | 2.709660451  | 1.53E-37    | 7.51E-36    |

Table S1. The differentially expressed genes(DEGs) were screened out in TCGA

| ID         | conMean     | treatMean   | logFC        | pValue      | FDR         |
|------------|-------------|-------------|--------------|-------------|-------------|
| NID2       | 3.515416139 | 7.152124139 | 1.024676298  | 2.97E-09    | 5.45E-09    |
| CDKL2      | 4.504130528 | 1.504957873 | -1.581525533 | 1.57E-28    | 1.19E-27    |
| CACNA2D3   | 1.874950892 | 0.436264911 | -2.103576463 | 8.17E-38    | 4.46E-36    |
| AC005086.2 | 0.045484732 | 0.238313234 | 2.389404821  | 0.002996051 | 0.003716945 |
| AC004918.1 | 1.559502676 | 4.310374283 | 1.46672712   | 6.28E-24    | 3.12E-23    |
| LINC01874  | 6.198979607 | 0.912968108 | -2.763394389 | 1.83E-22    | 8.12E-22    |
| AL844908.1 | 0.546569851 | 1.171249241 | 1.099570324  | 0.000976891 | 0.001257176 |
| C3         | 22.99807194 | 235.7467393 | 3.357652995  | 2.34E-33    | 3.56E-32    |
| SLC5A11    | 1.551706779 | 0.198199633 | -2.968829765 | 2.44E-18    | 7.98E-18    |
| LBHD1      | 0.481538508 | 1.000807954 | 1.055442082  | 1.79E-21    | 7.37E-21    |
| TOX        | 4.555773763 | 1.986685612 | -1.197332518 | 2.67E-21    | 1.09E-20    |
| GOLGA8A    | 0.516654217 | 3.861288915 | 2.901811555  | 6.98E-17    | 2.06E-16    |
| FGF7       | 1.747524878 | 0.800011909 | -1.127219613 | 6.85E-17    | 2.03E-16    |
| MUC15      | 28.05434097 | 0.18735572  | -7.22630019  | 3.02E-42    | 1.36E-39    |
| TGM2       | 28.41593422 | 67.49115931 | 1.247998388  | 3.00E-18    | 9.74E-18    |
| AP001767.4 | 0.302337569 | 0.724697579 | 1.261218815  | 4.93E-07    | 7.88E-07    |
| ACKR3      | 8.768886819 | 42.47723586 | 2.276224274  | 1.34E-31    | 1.48E-30    |
| ZNF582-AS1 | 2.039757036 | 0.802189067 | -1.346383109 | 1.45E-31    | 1.60E-30    |
| AC008759.2 | 0.111313096 | 0.25275364  | 1.183108537  | 0.00020717  | 0.000278954 |
| HAPLN3     | 0.602839985 | 3.170850215 | 2.395022714  | 3.22E-32    | 3.95E-31    |
| AC008556.1 | 1.932685154 | 0.639892982 | -1.594704085 | 1.44E-13    | 3.44E-13    |
| PLA2G6     | 0.954664944 | 2.340319577 | 1.293639158  | 3.84E-11    | 7.90E-11    |
| LINC01659  | 0.765055267 | 0.16044609  | -2.253475342 | 2.26E-17    | 6.92E-17    |
| TM6SF2     | 0.798655661 | 1.804933633 | 1.176300264  | 1.37E-05    | 2.00E-05    |
| IGHV3-48   | 1.24586632  | 9.322350761 | 2.903544519  | 1.91E-06    | 2.94E-06    |
| CCDC85B    | 5.374663751 | 14.15027453 | 1.396583638  | 6.19E-18    | 1.97E-17    |
| RAP1GAP    | 54.51348382 | 8.597448778 | -2.664632602 | 7.93E-37    | 3.03E-35    |
| ITGA5      | 7.631388542 | 29.35314983 | 1.943497838  | 9.55E-32    | 1.08E-30    |
| AC103591.3 | 0.275541812 | 0.999781431 | 1.859341475  | 4.34E-15    | 1.14E-14    |
| SNORA55    | 0.349013507 | 1.079014501 | 1.628359479  | 6.36E-09    | 1.14E-08    |
| HPCA       | 0.124252004 | 0.842036195 | 2.760613134  | 4.86E-31    | 4.96E-30    |
| CLDN10     | 38.11023033 | 7.829517671 | -2.283182988 | 5.36E-40    | 7.56E-38    |
| CETP       | 2.257560383 | 5.432347509 | 1.266811196  | 2.15E-18    | 7.06E-18    |
| SGPP1      | 23.75221722 | 9.93914416  | -1.256868658 | 2.51E-38    | 1.65E-36    |
| WWTR1-IT1  | 0.081702743 | 0.388166828 | 2.248220415  | 6.69E-09    | 1.20E-08    |
| KIR2DL4    | 0.071827739 | 0.384075366 | 2.418776434  | 3.36E-28    | 2.44E-27    |
| AC126755.1 | 0.119332308 | 0.262168613 | 1.135510287  | 3.96E-12    | 8.67E-12    |
| B3GNT8     | 3.554914364 | 1.36308227  | -1.382942167 | 1.57E-24    | 8.24E-24    |
| BLOC1S5-TX | 0.729780425 | 0.198290467 | -1.879847132 | 2.11E-15    | 5.69E-15    |
| MAP3K7CL   | 1.753906256 | 7.416105473 | 2.080090123  | 3.23E-30    | 2.96E-29    |
| SPN        | 0.684516422 | 3.083263994 | 2.171301362  | 2.71E-29    | 2.22E-28    |
| AC007224.2 | 0.078824584 | 0.297728144 | 1.917278057  | 2.91E-11    | 6.03E-11    |
| SNHG20     | 1.119141617 | 2.613429903 | 1.223551857  | 3.19E-25    | 1.77E-24    |
| SMPDL3A    | 12.82003822 | 46.65686771 | 1.863688893  | 6.23E-31    | 6.26E-30    |
| ODF3L1     | 0.241377558 | 0.484579905 | 1.005443035  | 1.68E-10    | 3.33E-10    |
| HES5       | 0.021555276 | 0.312271753 | 3.856689166  | 2.35E-27    | 1.57E-26    |
| AL627309.6 | 0.25032963  | 0.918761832 | 1.875861863  | 5.30E-08    | 9.00E-08    |
| AC131971.1 | 0.038571792 | 0.241308557 | 2.645260993  | 1.26E-09    | 2.37E-09    |
| GDF15      | 79.55718229 | 34.44815336 | -1.207565533 | 1.94E-16    | 5.58E-16    |
| ASAP3      | 7.348217    | 3.347026746 | -1.134514151 | 2.86E-33    | 4.26E-32    |
| AC013553.3 | 0.125077088 | 0.492833906 | 1.978283979  | 9.77E-22    | 4.10E-21    |
| AC109826.1 | 0.089014179 | 0.65232491  | 2.873483652  | 1.83E-37    | 8.77E-36    |
| PPM1E      | 0.922726528 | 0.323920601 | -1.51026291  | 2.61E-32    | 3.28E-31    |
| AC138356.2 | 2.318784028 | 0.976440248 | -1.247764785 | 4.52E-32    | 5.40E-31    |
| TNFRSF10B  | 7.282567361 | 20.89170975 | 1.520411519  | 2.66E-37    | 1.22E-35    |



Table S1. The differentially expressed genes(DEGs) were screened out in TCGA

| ID         | conMean     | treatMean   | logFC        | pValue      | FDR        |
|------------|-------------|-------------|--------------|-------------|------------|
| KCNJ15     | 35.48048363 | 14.53452865 | -1.287541388 | 2.06E-19    | 7.30E-19   |
| TIMD4      | 1.461899504 | 4.944896481 | 1.75809618   | 1.85E-16    | 5.33E-16   |
| GPR27      | 3.575302901 | 1.011471444 | -1.821609882 | 1.12E-30    | 1.09E-29   |
| TDRD10     | 0.34652835  | 0.790732507 | 1.190216348  | 1.42E-10    | 2.83E-10   |
| RGS19      | 2.453337944 | 8.046626505 | 1.713638093  | 3.22E-36    | 9.59E-35   |
| RN7SL333P  | 0.156997919 | 0.421127418 | 1.423511374  | 1.30E-11    | 2.77E-11   |
| AL133243.3 | 0.147665547 | 0.297547904 | 1.010788698  | 3.69E-12    | 8.10E-12   |
| RPL21P16   | 2.249154601 | 5.462976527 | 1.280304392  | 1.65E-08    | 2.89E-08   |
| FOXJ3      | 8.211005361 | 26.07583724 | 1.667082793  | 2.66E-24    | 1.36E-23   |
| EDN1       | 9.967852014 | 34.23102498 | 1.779949937  | 4.86E-18    | 1.55E-17   |
| FUT2       | 0.93987692  | 0.254673434 | -1.883823369 | 3.48E-09    | 6.36E-09   |
| RGCC       | 28.49081399 | 86.71599104 | 1.605801221  | 6.65E-24    | 3.30E-23   |
| EVPL       | 6.259346236 | 2.102499113 | -1.573906789 | 6.96E-30    | 6.12E-29   |
| MAP6D1     | 0.406413233 | 0.858819051 | 1.079406815  | 6.74E-22    | 2.86E-21   |
| PDGFRA     | 7.540041465 | 1.449602308 | -2.3789153   | 9.55E-32    | 1.08E-30   |
| JAG2       | 2.464757322 | 7.855815598 | 1.672315458  | 2.89E-27    | 1.92E-26   |
| AC124798.1 | 1.111123411 | 2.544946923 | 1.195616504  | 1.43E-13    | 3.42E-13   |
| AC022432.1 | 0.039475432 | 0.639032419 | 4.01686216   | 3.74E-27    | 2.45E-26   |
| AC023024.1 | 0.244518768 | 1.823466286 | 2.898666419  | 3.37E-31    | 3.52E-30   |
| ASB2       | 0.308500828 | 0.840147932 | 1.445369015  | 8.24E-18    | 2.59E-17   |
| MAN1A1     | 58.70055556 | 21.54610194 | -1.445947273 | 7.66E-38    | 4.22E-36   |
| AC124944.3 | 0.175001827 | 1.050264643 | 2.58531101   | 7.89E-23    | 3.59E-22   |
| AC114284.1 | 0.059152957 | 0.226879308 | 1.939402838  | 7.63E-23    | 3.48E-22   |
| AC010789.1 | 0.279944814 | 0.748072196 | 1.418035057  | 0.025922636 | 0.02993243 |
| MIR34AHG   | 0.087719431 | 0.276289166 | 1.655210638  | 3.29E-21    | 1.33E-20   |
| KCNMA1     | 0.704355198 | 3.483006472 | 2.305958102  | 5.69E-25    | 3.09E-24   |
| GRAP2      | 0.204742758 | 0.68192207  | 1.735794455  | 3.09E-25    | 1.72E-24   |
| HAVCR1     | 6.007565563 | 27.91057405 | 2.215959404  | 2.90E-16    | 8.24E-16   |
| IDO1       | 1.222919186 | 12.36748266 | 3.338150901  | 2.43E-36    | 7.58E-35   |
| CYP4A11    | 60.44897469 | 20.9747067  | -1.527067232 | 2.57E-07    | 4.18E-07   |
| TRIP13     | 0.459293692 | 1.571612808 | 1.774756957  | 3.39E-32    | 4.15E-31   |
| RUSC1-AS1  | 0.482382394 | 1.460941908 | 1.598649654  | 1.31E-16    | 3.81E-16   |
| AC092296.3 | 0.689801607 | 0.240266017 | -1.521548877 | 1.48E-06    | 2.29E-06   |
| TRBV9      | 0.190927867 | 1.639053492 | 3.10176335   | 5.33E-23    | 2.46E-22   |
| LY6E       | 33.87197125 | 108.7793846 | 1.683241314  | 6.10E-24    | 3.04E-23   |
| AC020913.3 | 0.074073049 | 0.61797341  | 3.060524138  | 1.27E-13    | 3.04E-13   |
| AL157373.2 | 2.742082392 | 0.618913586 | -2.147462024 | 3.94E-35    | 8.82E-34   |
| SIGLEC17P  | 0.100319781 | 0.349272618 | 1.799747441  | 1.52E-26    | 9.49E-26   |
| KLHL14     | 5.137352938 | 0.361725161 | -3.828059331 | 6.06E-41    | 1.48E-38   |
| AC073487.1 | 0.133786008 | 0.604039306 | 2.174715197  | 2.05E-19    | 7.27E-19   |
| AC107021.1 | 0.222419802 | 1.197723969 | 2.428938314  | 1.58E-24    | 8.27E-24   |
| NME1-NME2  | 0.199332324 | 0.405114842 | 1.023155265  | 4.55E-17    | 1.36E-16   |
| TMEM174    | 42.01655936 | 9.471136813 | -2.149348521 | 4.99E-11    | 1.02E-10   |
| TRAV19     | 0.158428723 | 1.430488225 | 3.174601803  | 4.24E-25    | 2.33E-24   |
| LINC01358  | 0.244871587 | 3.127218933 | 3.674782937  | 7.41E-32    | 8.58E-31   |
| AL136040.1 | 1.023321563 | 0.372421409 | -1.458251645 | 2.42E-29    | 2.00E-28   |
| PTGER3     | 36.22309219 | 8.233594074 | -2.137315479 | 1.06E-33    | 1.73E-32   |
| DGKH       | 1.061966836 | 2.133349009 | 1.006381292  | 3.91E-18    | 1.26E-17   |
| GAPDHP35   | 1.073384467 | 2.827620574 | 1.397421629  | 9.29E-12    | 1.99E-11   |
| APEH       | 33.74179671 | 14.1742646  | -1.251262911 | 6.65E-36    | 1.84E-34   |
| CARD11     | 0.949591299 | 4.033692469 | 2.086722476  | 6.80E-24    | 3.36E-23   |
| RPS14      | 88.95319097 | 183.6508046 | 1.045846952  | 1.08E-29    | 9.28E-29   |
| EGF        | 74.50253505 | 1.589919098 | -5.550264254 | 3.88E-38    | 2.40E-36   |
| AL355102.4 | 2.675754908 | 0.422136817 | -2.664163409 | 1.53E-32    | 2.02E-31   |
| CD244      | 0.212198227 | 1.08118021  | 2.3491225    | 1.61E-32    | 2.11E-31   |

Table S1. The differentially expressed genes(DEGs) were screened out in TCGA

| ID         | conMean     | treatMean   | logFC        | pValue      | FDR         |
|------------|-------------|-------------|--------------|-------------|-------------|
| RNU6-388P  | 0.135559044 | 0.343546784 | 1.341585206  | 1.40E-05    | 2.03E-05    |
| CRIP3      | 0.35303149  | 0.759888053 | 1.10599002   | 1.77E-05    | 2.56E-05    |
| TNFSF8     | 0.475100429 | 1.746131819 | 1.877858061  | 1.89E-25    | 1.07E-24    |
| GAL3ST3    | 3.218246006 | 0.155703104 | -4.369404999 | 9.80E-39    | 7.39E-37    |
| RIC3       | 1.235257306 | 0.605618591 | -1.028330191 | 1.02E-21    | 4.27E-21    |
| AC023906.5 | 0.126820873 | 0.476635068 | 1.910092889  | 8.17E-20    | 2.98E-19    |
| ANXA1      | 17.07867731 | 42.6919013  | 1.321766168  | 9.46E-25    | 5.05E-24    |
| AL353593.3 | 0.229393571 | 0.746300554 | 1.701931799  | 1.84E-09    | 3.42E-09    |
| BIN2       | 1.10576349  | 4.505740075 | 2.026721247  | 2.81E-35    | 6.57E-34    |
| RF00275    | 0.102669382 | 0.369845992 | 1.848918632  | 6.68E-12    | 1.44E-11    |
| LINC00864  | 3.000613271 | 0.065796591 | -5.511100753 | 1.07E-44    | 6.87E-42    |
| AC016734.1 | 0.327819577 | 0.760878033 | 1.214763198  | 8.93E-13    | 2.03E-12    |
| FAS        | 4.339167014 | 10.13104214 | 1.223292565  | 1.32E-26    | 8.24E-26    |
| DPRXP4     | 0.107680444 | 0.518838141 | 2.26852828   | 5.05E-24    | 2.53E-23    |
| AC093458.2 | 0.258029969 | 0.667630255 | 1.371510699  | 4.29E-11    | 8.78E-11    |
| ENPEP      | 29.36913641 | 58.85286841 | 1.002811888  | 3.42E-10    | 6.64E-10    |
| PTPRN      | 0.164265237 | 1.186600894 | 2.852735669  | 2.86E-33    | 4.26E-32    |
| TMEM176A   | 62.54046147 | 155.3229183 | 1.312408949  | 6.95E-24    | 3.43E-23    |
| AC073486.1 | 5.333237005 | 54.77972377 | 3.360558644  | 1.56E-28    | 1.18E-27    |
| AC019117.1 | 0.131656975 | 0.788094498 | 2.581584676  | 6.95E-13    | 1.60E-12    |
| AC002064.2 | 0.292878027 | 0.86220948  | 1.557738465  | 8.61E-09    | 1.54E-08    |
| ITPKA      | 0.09901447  | 1.438261707 | 3.860543031  | 2.01E-27    | 1.35E-26    |
| CD68       | 0.22119933  | 1.935416552 | 3.129225182  | 3.70E-37    | 1.59E-35    |
| FFAR4      | 0.06821887  | 0.476398208 | 2.803925232  | 6.91E-31    | 6.91E-30    |
| NUDT4      | 14.57659069 | 4.183296724 | -1.800941091 | 4.48E-36    | 1.29E-34    |
| AC099677.1 | 1.318743608 | 4.291603918 | 1.702352831  | 2.78E-11    | 5.77E-11    |
| EGR3       | 6.343968006 | 2.993250131 | -1.083672652 | 4.58E-05    | 6.44E-05    |
| TNNT3      | 0.09647057  | 1.188196383 | 3.6225406    | 5.14E-07    | 8.22E-07    |
| AL049780.1 | 0.141855743 | 0.570798577 | 2.008557176  | 4.22E-14    | 1.04E-13    |
| AP000812.1 | 0.081465681 | 0.28189464  | 1.790891727  | 1.10E-17    | 3.43E-17    |
| NPTX2      | 1.978962318 | 67.65095748 | 5.095294306  | 1.76E-39    | 1.92E-37    |
| TKFC       | 11.84667872 | 5.187293183 | -1.191428831 | 2.19E-25    | 1.24E-24    |
| EHD3       | 17.39404682 | 7.552602992 | -1.203547765 | 3.39E-10    | 6.58E-10    |
| AC044781.1 | 0.009184703 | 0.226240156 | 4.622478132  | 1.06E-21    | 4.44E-21    |
| TMEM25     | 7.513849292 | 3.245368238 | -1.211169996 | 2.29E-35    | 5.46E-34    |
| AP003469.2 | 0.071256052 | 0.730920074 | 3.358629201  | 5.73E-35    | 1.24E-33    |
| BX679664.1 | 0.111591715 | 0.325926244 | 1.546315601  | 4.58E-08    | 7.81E-08    |
| SFXN2      | 9.008744128 | 1.860068199 | -2.275970481 | 1.03E-30    | 1.01E-29    |
| RNU6-88P   | 0.200936085 | 1.121783265 | 2.48098539   | 8.67E-14    | 2.10E-13    |
| TDO2       | 0.149940492 | 0.619882968 | 2.047605828  | 3.02E-08    | 5.20E-08    |
| SMOX       | 3.338215635 | 7.1817972   | 1.105267765  | 2.10E-20    | 7.96E-20    |
| SLC37A2    | 0.485046509 | 3.289541516 | 2.761691526  | 4.29E-36    | 1.24E-34    |
| TESPA1     | 0.195959615 | 1.094556215 | 2.481717786  | 2.25E-30    | 2.11E-29    |
| HOXD8      | 40.30395319 | 11.82344717 | -1.769270632 | 1.64E-40    | 3.18E-38    |
| IRF6       | 16.37202504 | 5.311937999 | -1.623922566 | 1.14E-34    | 2.28E-33    |
| PLA2G7     | 0.377565883 | 4.702069367 | 3.638495509  | 1.20E-36    | 4.28E-35    |
| AC016949.1 | 0.090029061 | 0.343306084 | 1.931032742  | 3.61E-17    | 1.09E-16    |
| AL136115.2 | 0.075701617 | 0.271264446 | 1.841303939  | 3.51E-06    | 5.32E-06    |
| USP53      | 7.581357681 | 2.91940628  | -1.376781234 | 1.54E-35    | 3.84E-34    |
| MIR3142HG  | 0.115701526 | 0.552081466 | 2.254473278  | 4.13E-21    | 1.65E-20    |
| SLC43A1    | 5.120039725 | 1.976245468 | -1.373392849 | 4.09E-24    | 2.06E-23    |
| IGHV3-21   | 4.432468157 | 31.22557114 | 2.816545788  | 2.22E-06    | 3.40E-06    |
| CCDC84     | 0.964298764 | 3.305318058 | 1.777237     | 4.14E-23    | 1.93E-22    |
| CD3G       | 0.354834962 | 2.149054049 | 2.598481698  | 6.83E-28    | 4.79E-27    |
| RN7SL221P  | 0.176136654 | 0.365825988 | 1.054462398  | 0.000311545 | 0.000414641 |

Table S1. The differentially expressed genes(DEGs) were screened out in TCGA

| ID         | conMean     | treatMean   | logFC        | pValue      | FDR         |
|------------|-------------|-------------|--------------|-------------|-------------|
| CR2        | 2.50528243  | 0.183293138 | -3.77274857  | 1.14E-28    | 8.71E-28    |
| FSTL1      | 24.33877467 | 62.9156698  | 1.370162843  | 6.50E-21    | 2.56E-20    |
| AL121894.2 | 0.267122849 | 0.581679101 | 1.122720085  | 3.95E-15    | 1.04E-14    |
| BNIP3P15   | 0.06137006  | 0.306205204 | 2.318891906  | 3.21E-09    | 5.87E-09    |
| SERPINF2   | 46.09460572 | 95.70308854 | 1.053967557  | 6.55E-08    | 1.10E-07    |
| RNU4-89P   | 0.089000495 | 0.362601343 | 2.026498998  | 1.02E-06    | 1.59E-06    |
| ZDHHC20-IT | 0.097635697 | 0.286261883 | 1.551854961  | 2.66E-14    | 6.66E-14    |
| BTN2A3P    | 0.511304397 | 1.045100729 | 1.031387661  | 3.71E-16    | 1.05E-15    |
| MIR548P    | 0.011306763 | 0.321272553 | 4.828539931  | 2.73E-12    | 6.03E-12    |
| CCR7       | 0.523290493 | 1.614489439 | 1.625394051  | 1.00E-19    | 3.62E-19    |
| PLA2G4C    | 1.71507365  | 3.575800503 | 1.059995719  | 1.61E-20    | 6.18E-20    |
| RF00134    | 0.121167056 | 0.628173621 | 2.374165866  | 1.67E-13    | 3.97E-13    |
| RPL26P35   | 0.017367597 | 0.267742917 | 3.946378379  | 4.30E-12    | 9.39E-12    |
| GLIPR1     | 1.906767725 | 5.421736673 | 1.507625934  | 2.59E-23    | 1.23E-22    |
| UBA52P7    | 0.095170169 | 0.321917656 | 1.758110369  | 1.06E-08    | 1.88E-08    |
| MIF        | 23.23782518 | 51.43787337 | 1.146355944  | 1.44E-20    | 5.55E-20    |
| SLC11A1    | 0.304216049 | 1.604221745 | 2.398705405  | 1.83E-33    | 2.83E-32    |
| AC074033.1 | 0.65665951  | 0.147381221 | -2.155592794 | 1.07E-37    | 5.57E-36    |
| PRR7-AS1   | 0.03829638  | 0.382321865 | 3.319507784  | 1.99E-33    | 3.06E-32    |
| CYP1B1     | 23.12736461 | 10.32415432 | -1.163577267 | 1.52E-23    | 7.37E-23    |
| AC004918.3 | 1.140033119 | 2.304305472 | 1.015256244  | 8.81E-15    | 2.28E-14    |
| OSMR-AS1   | 0.209446442 | 0.499302905 | 1.253333925  | 4.20E-17    | 1.26E-16    |
| RF00154    | 0.36463123  | 1.838376607 | 2.333922311  | 1.07E-19    | 3.86E-19    |
| TPRG1      | 0.064556699 | 0.381203682 | 2.561923333  | 4.18E-29    | 3.36E-28    |
| SMTNL1     | 0.051976402 | 0.407928257 | 2.972386766  | 1.53E-25    | 8.75E-25    |
| ARHGAP24   | 25.16775225 | 8.285874178 | -1.602850556 | 1.57E-39    | 1.77E-37    |
| AC241644.2 | 1.403160831 | 0.132846593 | -3.400847245 | 1.13E-37    | 5.83E-36    |
| AC020978.4 | 0.763127212 | 0.190394738 | -2.002929968 | 5.80E-36    | 1.63E-34    |
| NAPSA      | 16.14601221 | 7.577385027 | -1.091405926 | 3.89E-16    | 1.10E-15    |
| HIST1H2APS | 0.496474485 | 0.199505504 | -1.315291026 | 0.000670164 | 0.00087132  |
| NELL1      | 8.886163536 | 0.154001832 | -5.850541278 | 4.63E-42    | 1.98E-39    |
| ARHGAP27P  | 0.31731414  | 1.367695025 | 2.107762852  | 9.89E-23    | 4.48E-22    |
| AL731567.1 | 0.103841281 | 0.831823464 | 3.00189729   | 1.53E-25    | 8.75E-25    |
| SLC47A1P2  | 0.097415891 | 0.655742694 | 2.750900796  | 5.16E-21    | 2.05E-20    |
| CDO1       | 1.754360218 | 0.56376283  | -1.637784737 | 9.38E-34    | 1.54E-32    |
| MIR5587    | 0.340544201 | 1.427350464 | 2.067425638  | 4.42E-09    | 8.03E-09    |
| TRAV10     | 0.048122876 | 0.335127569 | 2.799915593  | 8.40E-15    | 2.17E-14    |
| SEPT1      | 0.907773419 | 3.300159965 | 1.862131806  | 8.90E-34    | 1.48E-32    |
| DPP9       | 4.052760097 | 10.89226839 | 1.426327754  | 1.26E-37    | 6.36E-36    |
| IGHV1-67   | 0.185484984 | 0.771117159 | 2.055647673  | 0.000167899 | 0.000227519 |
| CALB1      | 53.47279118 | 0.31468416  | -7.408756613 | 1.11E-33    | 1.79E-32    |
| PDXDC2P-NI | 0.252384983 | 0.796080532 | 1.657288313  | 5.66E-16    | 1.58E-15    |
| AL109947.1 | 0.077280058 | 0.245354056 | 1.666697032  | 3.25E-06    | 4.93E-06    |
| AC010201.2 | 0.34135982  | 1.024145501 | 1.585055536  | 1.02E-12    | 2.31E-12    |
| PTAFR      | 1.975882161 | 5.364454696 | 1.440934618  | 2.14E-19    | 7.57E-19    |
| AL645939.2 | 0.050749796 | 0.332269615 | 2.710880437  | 2.69E-17    | 8.21E-17    |
| G6PC       | 29.90980479 | 2.819185278 | -3.407268294 | 4.61E-13    | 1.07E-12    |
| AP003064.2 | 0.066738311 | 0.244467486 | 1.873055532  | 1.77E-08    | 3.10E-08    |
| FUT6       | 10.75231009 | 4.6021329   | -1.224272099 | 9.76E-06    | 1.44E-05    |
| SUCNR1     | 17.03261574 | 4.083018258 | -2.060592086 | 3.30E-22    | 1.44E-21    |
| SNORD12B   | 0.260109582 | 1.217535684 | 2.226772605  | 1.24E-15    | 3.39E-15    |
| LINC00528  | 0.078201521 | 0.397998823 | 2.347495584  | 1.12E-34    | 2.25E-33    |
| SERPINE2   | 7.025307389 | 16.96775747 | 1.272162648  | 3.84E-10    | 7.42E-10    |
| LPL        | 18.19948001 | 7.88252081  | -1.207168252 | 2.99E-09    | 5.49E-09    |
| ENTPD1     | 3.469673056 | 7.055871642 | 1.024024591  | 3.97E-28    | 2.86E-27    |

Table S1. The differentially expressed genes(DEGs) were screened out in TCGA

| ID          | conMean     | treatMean   | logFC        | pValue      | FDR         |
|-------------|-------------|-------------|--------------|-------------|-------------|
| PPL         | 14.98075406 | 5.063256254 | -1.564972837 | 3.38E-18    | 1.09E-17    |
| ARL11       | 0.224860272 | 0.865995408 | 1.945330583  | 5.21E-33    | 7.46E-32    |
| AC093151.2  | 0.090825672 | 0.322229266 | 1.826915484  | 2.33E-09    | 4.31E-09    |
| AL163636.2  | 0.203478468 | 0.471588027 | 1.212650958  | 8.33E-15    | 2.15E-14    |
| OAS2        | 3.813517181 | 9.641639198 | 1.338156244  | 2.45E-25    | 1.37E-24    |
| AP000345.2  | 0.320649481 | 0.679099995 | 1.082626948  | 0.014434704 | 0.01699152  |
| TTC36       | 3.104165213 | 0.427300864 | -2.860881203 | 2.24E-33    | 3.42E-32    |
| AC010761.1  | 0.345711257 | 1.065560814 | 1.623973447  | 4.06E-19    | 1.40E-18    |
| SEC62-AS1   | 0.119914924 | 0.291289826 | 1.280444088  | 2.01E-08    | 3.51E-08    |
| AC090912.2  | 0.11188335  | 0.260778219 | 1.220828024  | 0.001521335 | 0.001931802 |
| RPL28       | 37.06324458 | 77.21067196 | 1.058811086  | 1.81E-29    | 1.51E-28    |
| C1QL4       | 0.496236658 | 4.16423225  | 3.068950316  | 4.03E-10    | 7.78E-10    |
| TRGV7       | 0.313894805 | 1.206958911 | 1.943023505  | 4.03E-25    | 2.21E-24    |
| AC091564.1  | 0.049896461 | 0.246097576 | 2.302221041  | 1.45E-16    | 4.21E-16    |
| AC105384.1  | 1.693074351 | 0.060408466 | -4.808750773 | 1.89E-33    | 2.92E-32    |
| AC007347.1  | 0.069902336 | 0.446118619 | 2.674014787  | 3.59E-18    | 1.16E-17    |
| MIR4312     | 0.113390118 | 0.448596935 | 1.984124847  | 4.91E-08    | 8.36E-08    |
| LAMB4       | 0.585920408 | 0.219031702 | -1.419565004 | 1.51E-33    | 2.38E-32    |
| AL159163.1  | 0.091585242 | 0.427084014 | 2.221332853  | 3.96E-28    | 2.86E-27    |
| PTCSC3      | 4.18756292  | 0.349949276 | -3.580893141 | 1.40E-38    | 1.01E-36    |
| AC034213.1  | 0.078500398 | 0.255476125 | 1.702416598  | 0.00128209  | 0.001637144 |
| AL096701.1  | 0.073557564 | 0.380780096 | 2.372012458  | 7.35E-20    | 2.69E-19    |
| IGHV3OR16-1 | 0.049234406 | 0.266705362 | 2.437508075  | 0.004213759 | 0.005170633 |
| AL445433.1  | 0.113416865 | 0.266623292 | 1.233167635  | 2.50E-08    | 4.33E-08    |
| TMEM145     | 0.043538696 | 0.859505075 | 4.303136062  | 4.90E-30    | 4.40E-29    |
| TRIM15      | 1.915216392 | 4.752751019 | 1.311255421  | 3.98E-12    | 8.71E-12    |
| RANBP3L     | 19.46878908 | 0.490052256 | -5.312083747 | 9.27E-40    | 1.19E-37    |
| MAGI2       | 2.910392611 | 0.96474223  | -1.592998361 | 1.66E-37    | 8.06E-36    |
| AC078922.1  | 0.069260199 | 0.285650911 | 2.044154701  | 9.86E-08    | 1.65E-07    |
| AL132657.1  | 0.280932633 | 0.978174418 | 1.799867516  | 1.83E-28    | 1.37E-27    |
| UNC5A       | 0.056414074 | 0.587547082 | 3.380577428  | 6.07E-28    | 4.29E-27    |
| AC026740.1  | 0.249513248 | 0.531345955 | 1.090535074  | 2.10E-10    | 4.13E-10    |
| SLC5A8      | 3.18239975  | 9.818593799 | 1.625401351  | 0.005550213 | 0.006751021 |
| TRBV19      | 0.319424665 | 2.130600632 | 2.73771257   | 1.23E-22    | 5.51E-22    |
| LPIN2       | 20.93879567 | 10.24070129 | -1.03186395  | 4.63E-30    | 4.17E-29    |
| AL445248.1  | 0.076766094 | 0.245366598 | 1.676397725  | 3.57E-12    | 7.85E-12    |
| MIR7848     | 0.052277588 | 0.719554979 | 3.782840452  | 1.72E-18    | 5.68E-18    |
| IGHV3-19    | 0.14152334  | 1.512142331 | 3.417482034  | 0.006781431 | 0.008197281 |
| MMP2-AS1    | 0.020771671 | 0.620347168 | 4.900386635  | 9.41E-32    | 1.07E-30    |
| PRRT2       | 0.211253089 | 1.18761652  | 2.491024728  | 6.31E-26    | 3.73E-25    |
| SLC6A19     | 43.41474775 | 10.47344008 | -2.051449818 | 3.52E-10    | 6.82E-10    |
| AL513327.3  | 0.086487319 | 0.23178849  | 1.422248414  | 1.46E-07    | 2.41E-07    |
| VEPH1       | 11.1272921  | 3.966368181 | -1.488212037 | 1.97E-33    | 3.04E-32    |
| EPHA3       | 0.854871614 | 2.921112756 | 1.772738373  | 1.42E-20    | 5.48E-20    |
| RNASE4      | 0.982363558 | 2.028999201 | 1.046439348  | 1.61E-14    | 4.09E-14    |
| AC090004.1  | 0.075303686 | 0.308365584 | 2.033849373  | 1.16E-21    | 4.84E-21    |
| LGI4        | 0.924436335 | 21.86502865 | 4.563907463  | 4.00E-30    | 3.63E-29    |
| GGT4P       | 0.472648144 | 1.438478078 | 1.60570474   | 3.73E-06    | 5.65E-06    |
| AC011389.2  | 0.047000466 | 0.274870155 | 2.548003311  | 1.73E-09    | 3.23E-09    |
| ADH1C       | 15.59172784 | 1.413523316 | -3.463413227 | 3.42E-39    | 3.20E-37    |
| AC092162.3  | 0.270544144 | 0.864878032 | 1.676632681  | 1.13E-19    | 4.09E-19    |
| RELT        | 0.328711904 | 1.41369825  | 2.104578605  | 9.91E-38    | 5.25E-36    |
| SNORA71A    | 0.204155151 | 2.271975998 | 3.476209723  | 3.65E-17    | 1.10E-16    |
| AC015911.3  | 0.100496825 | 0.821778501 | 3.031599658  | 7.92E-31    | 7.85E-30    |
| AC090616.6  | 0.094940498 | 0.352983243 | 1.894504178  | 1.56E-25    | 8.87E-25    |

Table S1. The differentially expressed genes(DEGs) were screened out in TCGA

| ID         | conMean     | treatMean   | logFC        | pValue      | FDR         |
|------------|-------------|-------------|--------------|-------------|-------------|
| PEG3       | 2.886837717 | 0.568261782 | -2.344862413 | 5.67E-40    | 7.89E-38    |
| TTC3P1     | 2.211994278 | 0.908048337 | -1.284506652 | 1.34E-31    | 1.48E-30    |
| ERVE-1     | 3.415181925 | 0.098634548 | -5.113725565 | 1.27E-46    | 9.67E-44    |
| AC008750.5 | 0.081667123 | 0.277560328 | 1.764974069  | 1.53E-13    | 3.65E-13    |
| GPR183     | 3.441182786 | 9.549883258 | 1.472578571  | 3.04E-20    | 1.14E-19    |
| DOCK6      | 3.584907708 | 8.287723747 | 1.209039937  | 6.17E-25    | 3.34E-24    |
| AC120057.4 | 0.155292965 | 0.656382502 | 2.079544301  | 4.95E-11    | 1.01E-10    |
| IGKV1D-39  | 0.06654096  | 0.620356125 | 3.220782062  | 0.000371867 | 0.000492062 |
| CAPN11     | 0.14195949  | 0.646903657 | 2.188071576  | 4.06E-34    | 7.22E-33    |
| CARD9      | 0.263058502 | 0.747432322 | 1.506559276  | 1.14E-22    | 5.12E-22    |
| PANO1      | 0.092043448 | 0.265765411 | 1.529766423  | 2.07E-25    | 1.17E-24    |
| C1QTNF6    | 0.693557922 | 3.347356726 | 2.270934028  | 9.60E-37    | 3.54E-35    |
| MIR570     | 2.855735589 | 10.53021831 | 1.882601034  | 1.02E-15    | 2.82E-15    |
| C3orf70    | 0.725644515 | 2.121469403 | 1.547729004  | 1.22E-22    | 5.48E-22    |
| RPS26P31   | 0.203414457 | 0.455562329 | 1.163226234  | 0.000618433 | 0.000805791 |
| NR4A3      | 7.697664926 | 3.264947522 | -1.23736107  | 7.83E-09    | 1.40E-08    |
| AL449212.1 | 0.465918425 | 1.321462386 | 1.503986073  | 1.64E-14    | 4.15E-14    |
| IL1RAP     | 0.788852025 | 1.612824186 | 1.031762573  | 1.46E-15    | 3.99E-15    |
| ZNF503-AS2 | 2.694723569 | 0.838852464 | -1.683648287 | 8.20E-35    | 1.69E-33    |
| DNER       | 9.593789833 | 1.542210449 | -2.637101188 | 1.49E-36    | 5.10E-35    |
| CYP4F3     | 5.655357784 | 1.225016479 | -2.206817142 | 3.06E-11    | 6.34E-11    |
| NPIP11     | 0.065136228 | 0.337381343 | 2.37284812   | 9.34E-21    | 3.63E-20    |
| SERPINE1   | 26.71965024 | 121.9353135 | 2.190142975  | 1.69E-15    | 4.58E-15    |
| PROX1      | 6.693235572 | 0.318916123 | -4.391454849 | 2.08E-37    | 9.78E-36    |
| AQP7P1     | 1.063368198 | 0.213133942 | -2.318808954 | 1.57E-19    | 5.61E-19    |
| AL133342.1 | 0.255520559 | 0.591895246 | 1.211902496  | 1.38E-13    | 3.30E-13    |
| RASSF5     | 1.457845893 | 4.860576768 | 1.737289295  | 9.68E-29    | 7.47E-28    |
| AC004486.1 | 0.156162079 | 0.572229531 | 1.87354979   | 2.51E-11    | 5.23E-11    |
| CD53       | 9.384634139 | 32.94409817 | 1.811647627  | 4.78E-30    | 4.30E-29    |
| TRPM3      | 2.045051509 | 1.005392538 | -1.024378294 | 1.43E-11    | 3.02E-11    |
| AP006284.1 | 0.309567291 | 4.084617159 | 3.721875914  | 7.15E-25    | 3.85E-24    |
| MMP13      | 0.015097142 | 0.441209196 | 4.869115487  | 2.22E-05    | 3.18E-05    |
| RPL22L1    | 3.563499847 | 9.217157221 | 1.371026997  | 1.91E-30    | 1.81E-29    |
| AL627309.7 | 0.42856317  | 1.256962068 | 1.552361336  | 2.79E-05    | 3.97E-05    |
| LINC01619  | 0.121932142 | 0.31760781  | 1.381167912  | 6.79E-14    | 1.66E-13    |
| ERBB4      | 5.04758368  | 0.34427227  | -3.873971037 | 1.75E-38    | 1.21E-36    |
| AC000089.1 | 0.402306081 | 0.830288481 | 1.045319141  | 9.67E-12    | 2.07E-11    |
| C2orf27A   | 0.669176872 | 1.786289748 | 1.416506625  | 5.00E-22    | 2.15E-21    |
| VAMP5      | 29.29337208 | 66.9035207  | 1.191507855  | 1.96E-29    | 1.64E-28    |
| AC073655.2 | 0.13464933  | 0.510042223 | 1.921409629  | 2.04E-20    | 7.76E-20    |
| PLA2G2D    | 0.10591699  | 1.17059791  | 3.466239676  | 2.11E-19    | 7.47E-19    |
| TRBV5-1    | 0.240400225 | 1.300121923 | 2.43513677   | 2.86E-21    | 1.16E-20    |
| CCL3       | 1.57382809  | 5.668468198 | 1.848680963  | 8.77E-18    | 2.75E-17    |
| AL358394.1 | 0.013271119 | 0.238688848 | 4.168769203  | 2.88E-09    | 5.30E-09    |
| OPA1-AS1   | 0.062135175 | 0.237333204 | 1.93343184   | 7.76E-08    | 1.30E-07    |
| AC018742.1 | 0.164483765 | 1.866376861 | 3.504223227  | 1.98E-06    | 3.04E-06    |
| NLRC5      | 1.011753493 | 4.915886327 | 2.280593726  | 1.78E-39    | 1.92E-37    |
| F11-AS1    | 2.07185343  | 0.10841946  | -4.25622631  | 1.54E-38    | 1.07E-36    |
| AC008050.1 | 0.076283648 | 0.30441559  | 1.996596508  | 4.99E-15    | 1.31E-14    |
| ADAM18     | 0.032297591 | 0.55225607  | 4.095838916  | 1.14E-33    | 1.84E-32    |
| HIST1H4PS1 | 0.070470797 | 0.339651082 | 2.268956017  | 2.31E-13    | 5.45E-13    |
| AC138969.1 | 0.069035446 | 0.247351472 | 1.841153277  | 1.67E-09    | 3.12E-09    |
| TMEM121B   | 0.09166189  | 0.258732155 | 1.49706543   | 1.55E-23    | 7.46E-23    |
| ATP5S      | 5.713454486 | 2.821232472 | -1.018037746 | 4.10E-30    | 3.71E-29    |
| IGLV1-51   | 14.28230035 | 57.20029646 | 2.001794261  | 8.59E-08    | 1.44E-07    |

Table S1. The differentially expressed genes(DEGs) were screened out in TCGA

| ID         | conMean     | treatMean   | logFC        | pValue      | FDR         |
|------------|-------------|-------------|--------------|-------------|-------------|
| MATN1-AS1  | 0.194796772 | 0.520804462 | 1.418772038  | 4.29E-22    | 1.85E-21    |
| KLHDC8A    | 0.262609357 | 0.836617986 | 1.671650694  | 1.59E-13    | 3.79E-13    |
| AL049629.1 | 2.086014158 | 0.406784251 | -2.358413219 | 2.06E-33    | 3.17E-32    |
| NFASC      | 5.810665203 | 1.877161087 | -1.630150873 | 3.93E-16    | 1.11E-15    |
| SERPINA4   | 3.617165533 | 0.69144386  | -2.387175596 | 6.87E-33    | 9.58E-32    |
| AC009509.4 | 0.625893089 | 1.369603414 | 1.129770052  | 3.24E-15    | 8.62E-15    |
| OR5BA1P    | 0.029969154 | 0.388261    | 3.695476527  | 4.04E-26    | 2.43E-25    |
| SALL3      | 0.65200688  | 0.14056505  | -2.213649258 | 4.86E-34    | 8.45E-33    |
| HIF1A      | 77.61493319 | 33.72896895 | -1.202346037 | 6.60E-24    | 3.27E-23    |
| AL121672.1 | 0.502227056 | 0.220846509 | -1.185295726 | 4.91E-23    | 2.28E-22    |
| AC010501.1 | 1.006588373 | 0.185455042 | -2.440332446 | 6.04E-39    | 4.95E-37    |
| RPL10P1    | 0.089376659 | 0.239800437 | 1.42386427   | 1.49E-14    | 3.79E-14    |
| AC073610.1 | 0.121997644 | 0.47124084  | 1.949611285  | 5.83E-26    | 3.45E-25    |
| ANKRD61    | 0.154828466 | 0.38341638  | 1.308241232  | 4.88E-13    | 1.13E-12    |
| IL7R       | 2.286850316 | 5.217229036 | 1.189921831  | 6.31E-14    | 1.54E-13    |
| CCRL2      | 0.87396559  | 2.426985188 | 1.47351692   | 3.50E-29    | 2.84E-28    |
| GARS-DT    | 0.361001413 | 1.171895885 | 1.698768014  | 2.32E-24    | 1.20E-23    |
| AL645939.1 | 0.024869746 | 0.543143741 | 4.448870369  | 4.96E-35    | 1.09E-33    |
| SIGLEC9    | 0.429428    | 2.155460318 | 2.327507835  | 5.48E-34    | 9.46E-33    |
| RUNX3      | 0.905378113 | 5.939608304 | 2.713775459  | 7.06E-35    | 1.49E-33    |
| ZNF767P    | 1.230112125 | 2.571757121 | 1.063964576  | 3.30E-10    | 6.41E-10    |
| RNASE6     | 6.939145097 | 20.2870591  | 1.547729902  | 2.05E-24    | 1.06E-23    |
| LY9        | 0.087430479 | 0.379791438 | 2.118999175  | 1.31E-25    | 7.53E-25    |
| SMIM5      | 7.909648513 | 0.765626949 | -3.368900069 | 4.86E-37    | 2.00E-35    |
| RAP1GAP2   | 6.036854846 | 2.600048292 | -1.215258693 | 7.30E-27    | 4.65E-26    |
| LHX1       | 3.020999611 | 0.296317473 | -3.349810393 | 1.49E-38    | 1.05E-36    |
| IGFN1      | 0.0204823   | 0.911985952 | 5.476561984  | 0.003403868 | 0.004207676 |
| RNU7-47P   | 0.161939031 | 0.485339599 | 1.583543828  | 1.10E-06    | 1.72E-06    |
| CASP17P    | 0.239359198 | 1.632083566 | 2.769465778  | 1.47E-37    | 7.33E-36    |
| CKMT1B     | 0.541732671 | 0.24504801  | -1.14451667  | 1.98E-29    | 1.65E-28    |
| SAP30      | 2.616934819 | 14.65200164 | 2.485147871  | 1.83E-38    | 1.26E-36    |
| Z94721.1   | 0.119882273 | 0.866926493 | 2.854291324  | 7.31E-29    | 5.71E-28    |
| RRM2       | 0.665280767 | 2.89982108  | 2.123928657  | 2.81E-32    | 3.49E-31    |
| WDR90      | 1.133551067 | 2.924645672 | 1.367412463  | 5.45E-27    | 3.51E-26    |
| AC104316.2 | 0.035198692 | 0.513354308 | 3.866361176  | 6.29E-28    | 4.43E-27    |
| CTSZ       | 69.80638611 | 165.7212512 | 1.247327688  | 7.54E-31    | 7.51E-30    |
| GRAMD1B    | 3.175829943 | 1.391293907 | -1.190706444 | 6.55E-11    | 1.33E-10    |
| TRBV14     | 0.083606474 | 0.464931186 | 2.475330631  | 8.50E-17    | 2.50E-16    |
| ADAMDEC1   | 0.134989204 | 2.665691681 | 4.303593988  | 7.61E-32    | 8.78E-31    |
| AC103724.4 | 0.057850022 | 0.25321157  | 2.129953906  | 1.07E-18    | 3.57E-18    |
| HIST1H4E   | 0.262708031 | 3.556245817 | 3.75882284   | 2.09E-07    | 3.41E-07    |
| FKBP1AP1   | 0.09252248  | 0.217658267 | 1.234188979  | 0.000208944 | 0.00028131  |
| AP001636.3 | 0.054284778 | 0.236897369 | 2.125642559  | 3.60E-30    | 3.29E-29    |
| RERG-IT1   | 0.231745942 | 1.159428306 | 2.322797634  | 9.08E-16    | 2.50E-15    |
| KRT7       | 35.15174872 | 10.83917463 | -1.697341558 | 1.11E-31    | 1.24E-30    |
| KLHDC7A    | 19.75846771 | 9.858132312 | -1.003084819 | 8.39E-20    | 3.05E-19    |
| DOCK2      | 0.635168029 | 3.143769683 | 2.307285326  | 1.22E-29    | 1.04E-28    |
| SNORA65    | 1.180308515 | 3.072045445 | 1.38003555   | 2.12E-07    | 3.47E-07    |
| LRRC17     | 1.137970015 | 3.561319569 | 1.645949355  | 3.91E-21    | 1.57E-20    |
| RNU6-343P  | 0.303801844 | 1.064779323 | 1.809351931  | 2.53E-12    | 5.61E-12    |
| ZBED5-AS1  | 10.73954844 | 5.094726197 | -1.075856815 | 2.76E-33    | 4.14E-32    |
| AC005519.1 | 0.195832194 | 0.735491067 | 1.909089863  | 9.31E-14    | 2.25E-13    |
| TF         | 0.247983323 | 4.357376627 | 4.135144811  | 1.88E-06    | 2.89E-06    |
| AL139246.3 | 0.304542784 | 0.678555268 | 1.155821407  | 1.64E-10    | 3.24E-10    |
| APOL6      | 5.881236125 | 12.52485652 | 1.090602757  | 4.66E-24    | 2.34E-23    |

Table S1. The differentially expressed genes(DEGs) were screened out in TCGA

| ID                    | conMean     | treatMean   | logFC        | pValue      | FDR         |
|-----------------------|-------------|-------------|--------------|-------------|-------------|
| SLC16A1               | 4.252015376 | 18.25550476 | 2.102112841  | 1.06E-35    | 2.77E-34    |
| AC025178.1            | 0.083500441 | 0.343700725 | 2.04129718   | 2.56E-20    | 9.64E-20    |
| AGFG2                 | 10.2761841  | 4.429681081 | -1.214029902 | 7.10E-10    | 1.35E-09    |
| DDX43P3               | 0.011118173 | 0.380032373 | 5.095130724  | 4.79E-24    | 2.40E-23    |
| MIR509-3              | 0.045156225 | 0.472379984 | 3.386951048  | 1.10E-13    | 2.66E-13    |
| WIPF1                 | 4.435878472 | 12.01389424 | 1.437412123  | 8.38E-34    | 1.40E-32    |
| PCDHB9                | 0.37329261  | 1.120707173 | 1.586030515  | 2.59E-23    | 1.23E-22    |
| SLC16A12              | 46.06132819 | 21.61515644 | -1.091512734 | 2.47E-19    | 8.68E-19    |
| PPDPFL                | 0.685562165 | 4.780564735 | 2.801821659  | 5.24E-20    | 1.94E-19    |
| APBB3                 | 1.563731728 | 4.423714624 | 1.500265293  | 6.37E-22    | 2.71E-21    |
| C10orf95              | 0.554663892 | 0.216551339 | -1.356904715 | 1.91E-20    | 7.29E-20    |
| SLC17A1               | 34.18064074 | 16.45820176 | -1.054372727 | 0.004470638 | 0.005474773 |
| LINC02038             | 2.406519517 | 0.232967204 | -3.368749347 | 5.50E-41    | 1.40E-38    |
| RNU4-21P              | 0.03179485  | 0.259275398 | 3.027620319  | 1.47E-08    | 2.58E-08    |
| AC004801.2            | 0.121958301 | 0.356325065 | 1.546806014  | 6.66E-12    | 1.44E-11    |
| PI4KAP1               | 0.359875067 | 1.054419324 | 1.550880659  | 1.90E-11    | 3.99E-11    |
| RPL5P24               | 0.11315026  | 0.228579284 | 1.014454756  | 3.86E-08    | 6.62E-08    |
| SKA3                  | 0.189742325 | 0.803104476 | 2.08154615   | 4.54E-35    | 1.01E-33    |
| SLA                   | 1.537339118 | 5.434049576 | 1.821592287  | 3.15E-27    | 2.08E-26    |
| HPX                   | 0.048201714 | 0.775773465 | 4.008479067  | 1.25E-23    | 6.11E-23    |
| NME3                  | 13.35129682 | 26.83313767 | 1.007035884  | 1.02E-21    | 4.27E-21    |
| CD7                   | 0.477295232 | 3.960605369 | 3.052767131  | 1.00E-31    | 1.13E-30    |
| SLC1A4                | 1.440338522 | 5.588999879 | 1.956182216  | 2.03E-38    | 1.37E-36    |
| TBC1D10C              | 0.398918212 | 2.37154956  | 2.571665124  | 2.81E-33    | 4.20E-32    |
| ANKHD1                | 0.361342331 | 0.745301581 | 1.044458046  | 8.25E-30    | 7.16E-29    |
| RN7SL172P             | 0.042553106 | 0.329834557 | 2.954406201  | 4.48E-19    | 1.54E-18    |
| AL137145.1            | 0.239620001 | 0.530893049 | 1.14767292   | 3.15E-09    | 5.78E-09    |
| GAS2L3                | 0.7374928   | 6.660265313 | 3.174878779  | 3.49E-36    | 1.03E-34    |
| IGKV3-7               | 0.517787288 | 1.660191768 | 1.680918443  | 2.58E-06    | 3.94E-06    |
| HYPK                  | 0.161296591 | 0.438972842 | 1.444415742  | 4.74E-17    | 1.42E-16    |
| MIR4685               | 0.079473606 | 0.329100863 | 2.049982106  | 9.15E-07    | 1.44E-06    |
| AC022126.1            | 0.090916625 | 0.214764547 | 1.240139816  | 5.12E-11    | 1.04E-10    |
| PCGF1                 | 2.875081167 | 5.915278406 | 1.040843386  | 8.31E-39    | 6.46E-37    |
| BMX                   | 0.376925734 | 1.104408092 | 1.550921162  | 3.29E-19    | 1.14E-18    |
| CCL3L1                | 0.782775898 | 2.583180855 | 1.722477412  | 1.35E-10    | 2.68E-10    |
| AP003071.4            | 1.116453966 | 0.169823319 | -2.716817289 | 1.67E-33    | 2.61E-32    |
| LINC01614             | 0.107100236 | 0.735019609 | 2.778821081  | 1.51E-22    | 6.75E-22    |
| ARHGAP9               | 0.499732457 | 3.005668544 | 2.588458095  | 1.97E-35    | 4.77E-34    |
| ZRANB2-AS10.426401815 | 0.181392954 | 0.181392954 | -1.233095159 | 2.93E-19    | 1.02E-18    |
| ASMTL-AS1             | 0.500563539 | 3.275899338 | 2.710265911  | 2.21E-15    | 5.95E-15    |
| SMIM22                | 3.495290079 | 0.980954555 | -1.833153985 | 3.69E-33    | 5.42E-32    |
| AL691432.1            | 0.263678383 | 0.685244196 | 1.377838904  | 5.94E-12    | 1.29E-11    |
| AC006017.1            | 0.165420176 | 0.462988477 | 1.484841081  | 7.41E-09    | 1.33E-08    |
| IGKV1-12              | 0.736419297 | 1.767910023 | 1.263445516  | 0.000522011 | 0.000684054 |
| RPL7AP10              | 0.10419246  | 0.323257893 | 1.633434714  | 6.90E-10    | 1.31E-09    |
| Z98884.2              | 0.493666825 | 1.243942034 | 1.333309657  | 1.53E-21    | 6.32E-21    |
| AC018638.3            | 0.148146667 | 0.403336523 | 1.444957885  | 0.000548066 | 0.000717192 |
| RNU6-593P             | 0.060170333 | 0.282567474 | 2.23147117   | 0.000412221 | 0.000543712 |
| GUSBP11               | 0.13302359  | 0.312179051 | 1.230691619  | 2.32E-10    | 4.54E-10    |
| L1CAM                 | 21.7755553  | 2.402221388 | -3.180268489 | 2.76E-36    | 8.44E-35    |
| AC127024.4            | 0.250425028 | 1.055792991 | 2.075876332  | 3.21E-17    | 9.74E-17    |
| SIGLEC7               | 0.3954582   | 1.735314715 | 2.133600216  | 8.91E-28    | 6.17E-27    |
| AC008897.1            | 0.291317218 | 0.872613272 | 1.582751442  | 2.95E-17    | 8.99E-17    |
| AC239800.2            | 0.045557701 | 0.225144471 | 2.305084187  | 8.93E-10    | 1.69E-09    |
| UGT3A2                | 1.079251286 | 0.441517634 | -1.289487848 | 1.30E-32    | 1.74E-31    |

Table S1. The differentially expressed genes(DEGs) were screened out in TCGA

| ID         | conMean     | treatMean   | logFC        | pValue      | FDR         |
|------------|-------------|-------------|--------------|-------------|-------------|
| JAKMIP1    | 0.046943229 | 0.577018503 | 3.619628589  | 4.44E-34    | 7.83E-33    |
| ZNF44      | 6.800551958 | 2.746508964 | -1.308052845 | 1.76E-33    | 2.75E-32    |
| IGKV1-27   | 3.305946873 | 12.32980267 | 1.899014265  | 8.85E-05    | 0.000122034 |
| P2RY1      | 0.436379634 | 2.44693325  | 2.48731907   | 1.46E-34    | 2.86E-33    |
| FYB2       | 2.458147796 | 0.532220499 | -2.207475676 | 1.90E-35    | 4.63E-34    |
| IGSF11     | 1.535052745 | 0.219585815 | -2.805431463 | 6.03E-31    | 6.08E-30    |
| AP001021.1 | 0.089276812 | 0.256122391 | 1.520475972  | 1.79E-08    | 3.14E-08    |
| MILR1      | 0.7388053   | 2.976665446 | 2.010430962  | 1.31E-30    | 1.26E-29    |
| KIFC2      | 1.132188507 | 2.672005039 | 1.238808545  | 3.40E-12    | 7.49E-12    |
| LINC00645  | 7.724902255 | 0.404416369 | -4.255603382 | 4.19E-39    | 3.67E-37    |
| AC111000.5 | 0.102159456 | 0.651808054 | 2.673624429  | 2.65E-23    | 1.25E-22    |
| RN7SL587P  | 0.055205498 | 0.261264268 | 2.242625972  | 0.000453032 | 0.000595861 |
| HMG1P13    | 0.034014298 | 0.633976739 | 4.220216704  | 8.30E-22    | 3.51E-21    |
| MIR3186    | 0.200235478 | 0.558325037 | 1.479407637  | 1.62E-05    | 2.34E-05    |
| AC019080.1 | 5.948519454 | 0.532585864 | -3.481444594 | 2.09E-16    | 6.01E-16    |
| NRXN3      | 0.324220056 | 0.840848319 | 1.374872239  | 2.92E-10    | 5.68E-10    |
| RN7SL674P  | 0.057858105 | 1.300918548 | 4.490867764  | 0.030449607 | 0.034940169 |
| MT1DP      | 1.108845122 | 2.42524997  | 1.129075582  | 1.14E-05    | 1.67E-05    |
| ODAM       | 0.974284077 | 0.116593312 | -3.062857451 | 3.60E-50    | 4.64E-47    |
| AC018638.7 | 0.248297049 | 0.730513764 | 1.556844342  | 1.12E-12    | 2.54E-12    |
| ULBP2      | 0.562564232 | 1.14788055  | 1.028882787  | 9.77E-17    | 2.87E-16    |
| AC026412.3 | 0.159989171 | 0.501250074 | 1.647556292  | 6.40E-25    | 3.46E-24    |
| BTNL9      | 2.535815522 | 11.89983962 | 2.23042043   | 2.96E-20    | 1.11E-19    |
| ZNF385D    | 0.881023946 | 0.355640471 | -1.308761721 | 1.25E-23    | 6.07E-23    |
| UNC5B      | 5.123127689 | 17.84339698 | 1.800293543  | 4.23E-28    | 3.04E-27    |
| SNORD62B   | 0.619861683 | 1.891764494 | 1.609714267  | 4.96E-14    | 1.22E-13    |
| CDKN1C     | 25.72729126 | 9.240980666 | -1.477181703 | 5.04E-27    | 3.26E-26    |
| AC130650.2 | 0.128327451 | 0.276841578 | 1.109230817  | 1.01E-08    | 1.80E-08    |
| AC087623.1 | 0.184244466 | 0.670013843 | 1.862569616  | 1.27E-12    | 2.86E-12    |
| ICAM1      | 11.38388336 | 29.8352402  | 1.390024607  | 7.81E-25    | 4.20E-24    |
| AC117383.1 | 0.061232478 | 0.364532804 | 2.573679677  | 1.73E-20    | 6.64E-20    |
| LINC002481 | 0.106715727 | 0.303743815 | 1.509082229  | 5.79E-21    | 2.29E-20    |
| AC015977.2 | 0.014170638 | 0.837433691 | 5.884998393  | 6.48E-29    | 5.11E-28    |
| NCAPH      | 0.261502444 | 0.994792243 | 1.927570827  | 3.90E-34    | 6.96E-33    |
| UHRF1      | 0.175342857 | 0.999957169 | 2.511687642  | 2.35E-34    | 4.35E-33    |
| STRA8      | 0.277139073 | 2.941844627 | 3.408039022  | 1.32E-30    | 1.27E-29    |
| HLA-DPA3   | 0.023220086 | 0.31058697  | 3.741552063  | 1.57E-22    | 6.99E-22    |
| IL10RB-DT  | 0.316998606 | 0.70279179  | 1.148620844  | 5.26E-26    | 3.13E-25    |
| TRAV8-6    | 0.15330211  | 0.827524867 | 2.43242511   | 1.64E-19    | 5.83E-19    |
| HMGB1P14   | 0.139750989 | 0.280183118 | 1.003511537  | 0.032414653 | 0.037099893 |
| RNY4P10    | 0.552204486 | 2.401061084 | 2.120397593  | 3.72E-18    | 1.20E-17    |
| OCLNP1     | 0.144169822 | 0.32704843  | 1.181735082  | 0.021717554 | 0.025243959 |
| GPR19      | 0.049171793 | 0.227858184 | 2.212233335  | 3.74E-33    | 5.50E-32    |
| EYA4       | 2.782415578 | 0.246837565 | -3.49470404  | 1.95E-38    | 1.32E-36    |
| SLC26A7    | 16.02201235 | 3.761266146 | -2.09076506  | 9.26E-37    | 3.45E-35    |
| TRBC1      | 0.107523008 | 0.793897945 | 2.884308154  | 5.32E-31    | 5.40E-30    |
| FCRL5      | 0.055348842 | 0.254621552 | 2.201729486  | 4.72E-08    | 8.04E-08    |
| RNU6-476P  | 0.154216283 | 0.405244081 | 1.393836015  | 1.41E-06    | 2.18E-06    |
| AL359881.2 | 0.096125846 | 0.271196255 | 1.496340957  | 1.05E-06    | 1.64E-06    |
| PTGDR      | 0.125898207 | 0.600976753 | 2.255051445  | 7.67E-30    | 6.68E-29    |
| TRAJ1      | 0.021891544 | 0.437100626 | 4.319519799  | 9.74E-13    | 2.22E-12    |
| LGALS4     | 1.349302087 | 16.59473613 | 3.620440403  | 0.00388106  | 0.004774906 |
| AL031186.1 | 0.224111997 | 0.606647044 | 1.436637502  | 1.47E-11    | 3.10E-11    |
| MTMR10     | 15.08177143 | 6.755550631 | -1.15866062  | 6.38E-37    | 2.50E-35    |
| AL139289.1 | 0.164707018 | 0.465144431 | 1.49777673   | 3.35E-14    | 8.34E-14    |



Table S1. The differentially expressed genes(DEGs) were screened out in TCGA

| ID          | conMean     | treatMean   | logFC        | pValue      | FDR         |
|-------------|-------------|-------------|--------------|-------------|-------------|
| LINC02427   | 0.45483795  | 0.172556827 | -1.398281083 | 2.88E-16    | 8.20E-16    |
| EHD2        | 19.15319929 | 90.67564636 | 2.243129729  | 3.22E-33    | 4.78E-32    |
| AC036108.3  | 0.124982375 | 0.278068321 | 1.153714731  | 4.21E-18    | 1.35E-17    |
| SIRLNT      | 1.948538931 | 0.046489317 | -5.389349724 | 7.57E-49    | 8.20E-46    |
| C3orf85     | 1.672702609 | 0.173523796 | -3.268975544 | 3.10E-17    | 9.42E-17    |
| AP001024.1  | 0.273213398 | 0.663310398 | 1.279655908  | 3.00E-10    | 5.84E-10    |
| RGS5        | 29.31606369 | 179.5032984 | 2.614247045  | 4.61E-28    | 3.30E-27    |
| AC025857.2  | 0.766397057 | 2.93842087  | 1.938877123  | 2.30E-20    | 8.70E-20    |
| ELF3        | 21.53043453 | 9.825140282 | -1.131827525 | 1.93E-11    | 4.05E-11    |
| AL049552.1  | 0.211944165 | 0.704279811 | 1.732464478  | 2.94E-14    | 7.34E-14    |
| PTPN3       | 13.43100863 | 5.646858894 | -1.250047164 | 6.86E-34    | 1.16E-32    |
| AL022341.1  | 0.23863542  | 0.484837946 | 1.022694419  | 1.11E-07    | 1.85E-07    |
| KCNMB2      | 1.154601965 | 0.262183158 | -2.138748666 | 5.87E-33    | 8.29E-32    |
| BTN3A3      | 3.689437306 | 10.43176266 | 1.499510245  | 6.23E-31    | 6.26E-30    |
| AC091849.2  | 0.138060852 | 0.622669615 | 2.173162591  | 1.40E-18    | 4.66E-18    |
| CD247       | 0.498860564 | 3.068987214 | 2.621054103  | 1.52E-34    | 2.95E-33    |
| UBAC2-AS1   | 0.894845754 | 0.388974433 | -1.201963693 | 1.83E-31    | 1.99E-30    |
| SCIN        | 23.36804397 | 5.544212033 | -2.07548264  | 2.39E-32    | 3.03E-31    |
| ORAOV1P1    | 0.417128785 | 2.602291587 | 2.641217848  | 2.21E-25    | 1.24E-24    |
| CD99P1      | 0.380865357 | 1.041995553 | 1.451996148  | 3.68E-30    | 3.36E-29    |
| AL158212.3  | 2.681801743 | 1.084576163 | -1.306071219 | 6.65E-29    | 5.23E-28    |
| CNTRF       | 1.18102445  | 0.46929796  | -1.331462739 | 1.14E-20    | 4.43E-20    |
| AC079140.2  | 0.38340225  | 0.909391549 | 1.246042795  | 5.14E-10    | 9.86E-10    |
| IGKV1OR2-10 | 0.522034729 | 3.167538683 | 2.601144546  | 0.001096191 | 0.001405867 |
| LINC01020   | 2.262612016 | 0.028810844 | -6.295233491 | 4.22E-32    | 5.09E-31    |
| HTR1F       | 0.217808437 | 0.67250603  | 1.626487367  | 8.96E-15    | 2.31E-14    |
| IGLV3-1     | 10.99084213 | 38.42420146 | 1.805713347  | 5.28E-07    | 8.42E-07    |
| DHRS4-AS1   | 14.17352183 | 6.918501356 | -1.034666814 | 4.02E-29    | 3.23E-28    |
| CST2        | 0.063156238 | 0.477178146 | 2.917530837  | 2.21E-09    | 4.10E-09    |
| MAPK11      | 2.818133111 | 6.46832241  | 1.198651834  | 1.79E-26    | 1.10E-25    |
| AL354811.1  | 0.233232463 | 0.488324448 | 1.066071404  | 3.46E-14    | 8.61E-14    |
| PRAP1       | 40.49086025 | 18.0439105  | -1.166084259 | 0.004896781 | 0.005977406 |
| PLXNB1      | 19.20313639 | 7.242743757 | -1.406733721 | 5.13E-36    | 1.46E-34    |
| SEMA3F-AS1  | 0.254400602 | 0.54769314  | 1.106265726  | 2.61E-11    | 5.42E-11    |
| BLNK        | 9.552324958 | 4.287332507 | -1.155771605 | 2.01E-29    | 1.67E-28    |
| SERPINF1    | 9.420696061 | 19.11711542 | 1.020959287  | 8.14E-06    | 1.20E-05    |
| IGLV10-54   | 1.894357916 | 7.256751497 | 1.93761493   | 9.55E-05    | 0.000131496 |
| TAS2R15P    | 0.177666165 | 0.406211449 | 1.193061944  | 1.59E-05    | 2.31E-05    |
| OCIAD1-AS1  | 0.353832424 | 0.880055543 | 1.314528322  | 5.72E-15    | 1.49E-14    |
| RBCK1       | 14.29818396 | 32.08218256 | 1.165940373  | 1.22E-35    | 3.13E-34    |
| MND1        | 0.252720219 | 0.72236309  | 1.515183086  | 2.45E-28    | 1.81E-27    |
| HS1BP3-IT1  | 0.413624005 | 1.166090217 | 1.495287589  | 4.75E-10    | 9.13E-10    |
| COL6A2      | 23.43663035 | 90.9595535  | 1.956460014  | 6.67E-28    | 4.69E-27    |
| AC090607.2  | 0.271769295 | 0.834130505 | 1.617890655  | 5.30E-16    | 1.48E-15    |
| MIR1254-1   | 0.709766756 | 2.271262653 | 1.678077644  | 1.39E-12    | 3.13E-12    |
| ARHGEF3     | 11.06614122 | 5.411104612 | -1.032157202 | 3.53E-32    | 4.32E-31    |
| IGFBP2      | 25.08906847 | 7.10265177  | -1.820629247 | 1.56E-33    | 2.46E-32    |
| POLG2       | 1.29673565  | 2.882698611 | 1.152535605  | 2.01E-26    | 1.23E-25    |
| HILPDA      | 4.372160292 | 112.6098692 | 4.686843168  | 6.58E-39    | 5.27E-37    |
| AC055713.1  | 0.153333498 | 0.396365769 | 1.370159465  | 4.88E-11    | 9.96E-11    |
| NEK2        | 0.248114188 | 0.848628824 | 1.774129445  | 1.32E-29    | 1.13E-28    |
| PADI1       | 0.062343248 | 3.396826756 | 5.76781051   | 2.91E-30    | 2.68E-29    |
| MIR513C     | 0.016679322 | 0.376634347 | 4.497032003  | 3.47E-13    | 8.13E-13    |
| ZMAT1       | 1.833548493 | 4.176359505 | 1.187607483  | 1.42E-11    | 3.00E-11    |
| RNASE2      | 0.376079281 | 2.019287882 | 2.424737872  | 1.50E-26    | 9.35E-26    |

Table S1. The differentially expressed genes(DEGs) were screened out in TCGA

| ID         | conMean     | treatMean   | logFC        | pValue      | FDR         |
|------------|-------------|-------------|--------------|-------------|-------------|
| SLC22A15   | 2.219463849 | 0.87531387  | -1.342338873 | 1.35E-29    | 1.15E-28    |
| LINC01571  | 3.224633306 | 0.024914233 | -7.016021123 | 1.75E-48    | 1.76E-45    |
| ITM2C      | 141.0551547 | 53.86792114 | -1.388761094 | 1.21E-32    | 1.63E-31    |
| OSTM1-AS1  | 0.004165584 | 2.009911219 | 8.914397199  | 6.74E-37    | 2.61E-35    |
| TRPM2      | 0.35163474  | 2.409790999 | 2.776758511  | 3.05E-37    | 1.35E-35    |
| PSMD10P1   | 0.096606309 | 0.473264538 | 2.292457517  | 1.91E-14    | 4.82E-14    |
| TUBA1B     | 28.00522028 | 59.12063956 | 1.0779661    | 1.83E-26    | 1.13E-25    |
| LINC01126  | 0.137911907 | 0.52035866  | 1.91575933   | 1.16E-19    | 4.17E-19    |
| AL731563.3 | 0.124384739 | 0.331001314 | 1.412027452  | 2.65E-20    | 9.96E-20    |
| UBE2Q2P1   | 0.277760907 | 0.651628353 | 1.230205815  | 7.76E-13    | 1.78E-12    |
| ENPP6      | 6.668230133 | 0.221967216 | -4.908885381 | 4.54E-35    | 1.01E-33    |
| AL359715.3 | 1.319978869 | 0.555996093 | -1.247368185 | 4.50E-33    | 6.52E-32    |
| SAMHD1     | 9.371830194 | 25.43711337 | 1.440532242  | 1.28E-25    | 7.37E-25    |
| AMPH       | 1.783234529 | 0.198144619 | -3.169870765 | 6.58E-39    | 5.27E-37    |
| SNORA38B   | 0.074171202 | 1.249112669 | 4.073900647  | 2.67E-06    | 4.07E-06    |
| PIK3CG     | 0.760539903 | 1.849939691 | 1.282382391  | 1.84E-14    | 4.65E-14    |
| EEF1DP4    | 0.127419005 | 0.310377832 | 1.284445044  | 0.008717613 | 0.010450578 |
| AL353625.1 | 0.32598156  | 0.743597628 | 1.189731812  | 4.95E-17    | 1.48E-16    |
| AC119044.1 | 0.159306454 | 0.91761334  | 2.526081651  | 1.10E-32    | 1.48E-31    |
| SPOCK2     | 40.85220172 | 20.04741825 | -1.026997379 | 3.93E-17    | 1.18E-16    |
| ZP1        | 0.028479287 | 0.332307903 | 3.544535695  | 8.03E-27    | 5.11E-26    |
| CTSL3P     | 0.408633627 | 3.27304904  | 3.001755385  | 1.24E-20    | 4.80E-20    |
| MROH2A     | 0.055007389 | 0.440000778 | 2.999808736  | 0.001697095 | 0.002146707 |
| PSMB10     | 7.361736236 | 18.93288573 | 1.362776357  | 4.98E-30    | 4.46E-29    |
| MIR5690    | 0.119263054 | 1.897629911 | 3.991979563  | 2.08E-09    | 3.87E-09    |
| CENPI      | 0.125928687 | 0.385372228 | 1.61364563   | 3.97E-30    | 3.60E-29    |
| TMSB10P1   | 0.292893075 | 1.341456525 | 2.19535431   | 1.42E-24    | 7.49E-24    |
| MAP7D2     | 1.6170332   | 8.557678396 | 2.403870163  | 2.77E-10    | 5.41E-10    |
| FCHO1      | 0.184007747 | 1.127399557 | 2.615160491  | 5.86E-32    | 6.92E-31    |
| IL10       | 0.200087059 | 0.50553959  | 1.337196218  | 3.56E-12    | 7.82E-12    |
| AC010261.1 | 0.041590909 | 0.332178171 | 2.997617159  | 3.21E-17    | 9.73E-17    |
| E2F2       | 0.079670582 | 0.409862349 | 2.363020441  | 3.67E-34    | 6.58E-33    |
| CETN4P     | 0.88187175  | 0.241878598 | -1.866285739 | 4.83E-32    | 5.76E-31    |
| TLR3       | 5.539796903 | 16.01348697 | 1.531382501  | 3.44E-24    | 1.74E-23    |
| CHIT1      | 0.077507872 | 2.431162175 | 4.971159477  | 1.23E-21    | 5.10E-21    |
| SNORA71C   | 0.189753187 | 1.043018488 | 2.45856871   | 5.12E-17    | 1.53E-16    |
| FAM219A    | 4.706011333 | 10.03365622 | 1.092270713  | 2.51E-35    | 5.90E-34    |
| AC068338.3 | 1.486563329 | 0.686806209 | -1.114005938 | 4.24E-24    | 2.14E-23    |
| HLA-T      | 0.078138046 | 0.226968832 | 1.538397116  | 2.40E-12    | 5.33E-12    |
| CTLA4      | 0.114287353 | 0.907691279 | 2.98953593   | 1.86E-27    | 1.25E-26    |
| AC073257.2 | 0.125382719 | 1.172503457 | 3.225181755  | 1.84E-33    | 2.85E-32    |
| AC138123.1 | 0.906416282 | 0.204915971 | -2.145141348 | 1.41E-32    | 1.88E-31    |
| MOB3A      | 9.203178167 | 19.64100457 | 1.093664657  | 2.84E-32    | 3.51E-31    |
| LINC01004  | 0.648160246 | 1.718184903 | 1.406462859  | 7.52E-11    | 1.52E-10    |
| TSPYL4     | 16.26668456 | 7.945529237 | -1.03370501  | 1.44E-34    | 2.82E-33    |
| SNORA12    | 0.186623819 | 4.971950714 | 4.735606961  | 2.09E-07    | 3.42E-07    |
| FPR1       | 1.842032599 | 5.525870812 | 1.584903241  | 4.13E-17    | 1.24E-16    |
| MEF2B      | 0.067171471 | 0.280599977 | 2.062594367  | 6.34E-28    | 4.46E-27    |
| DLL4       | 3.828581707 | 20.8556227  | 2.445554437  | 7.87E-32    | 9.04E-31    |
| PRR22      | 0.469087036 | 1.28305087  | 1.451650835  | 1.53E-18    | 5.07E-18    |
| PTGR1      | 51.32649625 | 20.62718435 | -1.315156876 | 2.38E-33    | 3.62E-32    |
| AC073850.1 | 0.062646858 | 0.642528592 | 3.358446603  | 3.04E-19    | 1.06E-18    |
| AC078942.1 | 0.095735213 | 0.237621822 | 1.311545748  | 0.000887889 | 0.001146504 |
| EPCAM      | 147.6145346 | 19.71968476 | -2.904126387 | 5.95E-40    | 8.16E-38    |
| EBLN2      | 0.183402937 | 0.463147692 | 1.336455584  | 5.42E-13    | 1.25E-12    |

Table S1. The differentially expressed genes(DEGs) were screened out in TCGA

| ID         | conMean     | treatMean   | logFC        | pValue      | FDR         |
|------------|-------------|-------------|--------------|-------------|-------------|
| ORM1       | 0.132598528 | 3.962466698 | 4.90126214   | 0.000614203 | 0.000800583 |
| AL139161.1 | 0.150467577 | 0.311781837 | 1.051084239  | 4.32E-09    | 7.86E-09    |
| C15orf48   | 1.413460164 | 4.141319402 | 1.550859252  | 1.65E-15    | 4.48E-15    |
| AC243960.1 | 0.190792211 | 0.905843615 | 2.247259733  | 2.19E-28    | 1.63E-27    |
| MSC        | 2.398311154 | 19.57436037 | 3.028874416  | 2.35E-32    | 2.98E-31    |
| AKT3-IT1   | 0.039740841 | 0.228090257 | 2.520910503  | 1.27E-09    | 2.39E-09    |
| NLGN1-AS1  | 0.003573108 | 0.297364789 | 6.378910362  | 3.51E-17    | 1.06E-16    |
| IQCH-AS1   | 1.797153022 | 0.884828431 | -1.022243608 | 3.25E-33    | 4.81E-32    |
| MYRFL      | 0.222257071 | 0.881603362 | 1.987900408  | 9.54E-09    | 1.70E-08    |
| ARHGAP11A  | 0.444274358 | 1.166353045 | 1.392481764  | 8.88E-30    | 7.68E-29    |
| UBASH3A    | 0.154910564 | 1.108511247 | 2.839115972  | 1.32E-30    | 1.27E-29    |
| GBGT1      | 1.353878774 | 2.727191009 | 1.010317183  | 2.06E-21    | 8.47E-21    |
| KCNJ16     | 83.59537583 | 28.69949732 | -1.542397673 | 2.60E-41    | 7.55E-39    |
| AL442128.2 | 0.096116367 | 0.22602998  | 1.233660112  | 3.08E-08    | 5.31E-08    |
| STAC3      | 0.440972936 | 2.161548379 | 2.293303105  | 6.65E-39    | 5.30E-37    |
| AC124312.2 | 2.647263175 | 1.186153641 | -1.158210734 | 6.40E-25    | 3.46E-24    |
| LAMC2      | 9.558824882 | 3.190328548 | -1.583128267 | 3.19E-22    | 1.39E-21    |
| KLRD1      | 0.084454012 | 0.438419828 | 2.37607518   | 1.76E-36    | 5.78E-35    |
| PNMA2      | 2.686043901 | 15.43642934 | 2.522784286  | 6.08E-31    | 6.13E-30    |
| PDZRN3     | 3.83829972  | 1.742249163 | -1.139516409 | 3.00E-26    | 1.83E-25    |
| FBXO41     | 0.301115941 | 1.192639593 | 1.985767144  | 3.00E-18    | 9.74E-18    |
| NUS1P2     | 1.846026783 | 7.430384381 | 2.00901336   | 3.15E-05    | 4.48E-05    |
| CELF2      | 1.958342142 | 3.957759983 | 1.015051283  | 8.26E-17    | 2.43E-16    |
| TAS2R4     | 0.10803253  | 0.315483386 | 1.54609824   | 1.02E-13    | 2.47E-13    |
| RASGRP4    | 0.268728011 | 0.926070755 | 1.784975716  | 7.29E-31    | 7.27E-30    |
| PTPN7      | 0.664340028 | 2.307957304 | 1.796622786  | 1.91E-19    | 6.76E-19    |
| PLCXD2     | 2.924746104 | 0.994981408 | -1.555569917 | 1.51E-30    | 1.44E-29    |
| FAM3D-AS1  | 0.813637887 | 0.147351838 | -2.465121806 | 1.77E-26    | 1.09E-25    |
| AC135983.2 | 0.362519957 | 0.993357709 | 1.454252909  | 6.32E-21    | 2.49E-20    |
| ST6GALNAC  | 3.575632299 | 1.623709044 | -1.138905249 | 1.72E-12    | 3.86E-12    |
| AC025165.4 | 0.21262203  | 0.47163318  | 1.149374137  | 1.62E-11    | 3.42E-11    |
| TAS2R5     | 0.171041228 | 0.676939957 | 1.984683757  | 1.11E-23    | 5.42E-23    |
| OR2I1P     | 2.471635189 | 36.05138876 | 3.866517112  | 1.33E-26    | 8.30E-26    |
| FRK        | 7.056410417 | 2.95226508  | -1.257112209 | 2.32E-35    | 5.49E-34    |
| AMT        | 7.996424444 | 3.817660885 | -1.066666095 | 2.89E-28    | 2.12E-27    |
| RPS6KA6    | 5.018454776 | 0.633164016 | -2.986592043 | 2.14E-40    | 3.76E-38    |
| AP001363.1 | 0.087840368 | 0.533056    | 2.601331108  | 1.60E-16    | 4.62E-16    |
| RASSF2     | 2.203617176 | 10.21528677 | 2.212784186  | 2.59E-34    | 4.76E-33    |
| IGKV1D-13  | 0.561049656 | 1.47929134  | 1.398705846  | 0.004004301 | 0.004920355 |
| CKMT1A     | 0.518990773 | 0.235902842 | -1.137516087 | 6.11E-28    | 4.31E-27    |
| ENO1-AS1   | 0.535005874 | 0.155833734 | -1.779547159 | 1.85E-20    | 7.09E-20    |
| DNAJC11    | 16.01264797 | 6.444798671 | -1.313004706 | 9.23E-32    | 1.05E-30    |
| BCL2L15    | 1.031817271 | 0.265193145 | -1.960072109 | 4.81E-14    | 1.18E-13    |
| AL117328.1 | 0.143187946 | 0.422381336 | 1.560636036  | 2.10E-14    | 5.30E-14    |
| TOM1L2     | 16.71482408 | 8.178493791 | -1.031221095 | 1.59E-33    | 2.49E-32    |
| ARHGAP33   | 0.533823811 | 2.370905437 | 2.15100256   | 1.93E-24    | 1.00E-23    |
| KCNJ2      | 1.090567771 | 3.974674312 | 1.865757224  | 1.31E-24    | 6.92E-24    |
| SEMA5B     | 2.082418883 | 27.6203172  | 3.729397684  | 2.77E-32    | 3.44E-31    |
| FYB1       | 2.609953703 | 8.63751124  | 1.726591467  | 3.92E-22    | 1.70E-21    |
| AC027702.1 | 0.290416508 | 0.932654071 | 1.683218609  | 3.25E-27    | 2.14E-26    |
| RPS2P5     | 17.5769104  | 39.40909676 | 1.164847182  | 5.32E-22    | 2.28E-21    |
| YTHDF3-AS1 | 1.567280154 | 0.761401555 | -1.041533665 | 3.32E-22    | 1.45E-21    |
| FOXD4      | 0.173076877 | 0.381926712 | 1.141882832  | 2.31E-10    | 4.52E-10    |
| ALDH1L2    | 0.352507251 | 0.878311024 | 1.317078976  | 4.36E-12    | 9.51E-12    |
| TRAF1      | 1.992486882 | 4.009239513 | 1.008758381  | 9.35E-15    | 2.41E-14    |

Table S1. The differentially expressed genes(DEGs) were screened out in TCGA

| ID         | conMean     | treatMean   | logFC        | pValue      | FDR         |
|------------|-------------|-------------|--------------|-------------|-------------|
| AC106772.2 | 2.733021082 | 0.080478581 | -5.085747917 | 2.42E-46    | 1.78E-43    |
| RNU6-190P  | 0.07713921  | 0.40188139  | 2.381233502  | 3.07E-10    | 5.97E-10    |
| NPIPA5     | 0.33014369  | 0.805377134 | 1.28657044   | 4.16E-07    | 6.68E-07    |
| C4orf47    | 0.914447017 | 5.236238429 | 2.517559304  | 5.52E-34    | 9.52E-33    |
| AC084880.1 | 1.472826144 | 7.585566004 | 2.364669691  | 5.54E-29    | 4.39E-28    |
| TRAV9-2    | 0.147797347 | 0.720451599 | 2.285281142  | 4.12E-18    | 1.33E-17    |
| AC090114.3 | 0.531068977 | 1.170088554 | 1.139646559  | 7.73E-10    | 1.47E-09    |
| SLC28A1    | 11.12268132 | 44.0771582  | 1.986526594  | 1.97E-24    | 1.02E-23    |
| F8         | 5.030398847 | 10.52304579 | 1.064807641  | 3.12E-05    | 4.44E-05    |
| AL031846.1 | 0.032092918 | 0.427136159 | 3.734369168  | 8.01E-34    | 1.34E-32    |
| CPNE5      | 0.734589456 | 2.583561551 | 1.814351162  | 7.72E-23    | 3.52E-22    |
| CNTN1      | 5.280299988 | 0.422711713 | -3.6428739   | 6.24E-39    | 5.08E-37    |
| L3MBTL1    | 0.329488467 | 0.685751623 | 1.057458165  | 6.57E-08    | 1.11E-07    |
| CFAP46     | 0.410921681 | 0.200888697 | -1.032467059 | 1.84E-21    | 7.57E-21    |
| LINC00511  | 0.158663073 | 0.411295962 | 1.374210514  | 1.02E-07    | 1.70E-07    |
| GPNMB      | 16.99379919 | 55.02679707 | 1.695125934  | 5.40E-07    | 8.60E-07    |
| HERC2P2    | 0.77392344  | 2.547209883 | 1.718655077  | 1.30E-12    | 2.93E-12    |
| FDX1       | 16.71874568 | 7.663216499 | -1.125444644 | 9.64E-38    | 5.14E-36    |
| AC022558.1 | 0.12288348  | 0.3631507   | 1.563277379  | 1.47E-12    | 3.30E-12    |
| GPR174     | 0.23297248  | 1.358328198 | 2.543600652  | 3.02E-21    | 1.22E-20    |
| MTDHP3     | 1.905147479 | 0.553665066 | -1.782817281 | 4.83E-25    | 2.64E-24    |
| SDC3       | 8.28777425  | 17.34777311 | 1.065693868  | 1.44E-23    | 6.97E-23    |
| ARL6IP4    | 0.273682172 | 0.854984085 | 1.643396106  | 1.66E-23    | 8.00E-23    |
| ALX1       | 1.673991251 | 0.188210374 | -3.152873929 | 1.09E-30    | 1.06E-29    |
| LONRF2     | 1.437745035 | 0.395287688 | -1.862832931 | 3.98E-31    | 4.11E-30    |
| LINC00921  | 0.279117056 | 0.779767616 | 1.482173956  | 1.09E-30    | 1.06E-29    |
| LINC01896  | 1.292712161 | 0.279952006 | -2.207149655 | 1.22E-36    | 4.32E-35    |
| UBE2L4     | 0.084354607 | 0.223487783 | 1.405657199  | 3.29E-05    | 4.66E-05    |
| NLRP1      | 1.135399042 | 2.674270392 | 1.235945913  | 1.91E-20    | 7.29E-20    |
| HSPB6      | 14.21254867 | 6.921540461 | -1.038000224 | 4.06E-14    | 1.00E-13    |
| AC098851.1 | 0.254308089 | 0.516757127 | 1.022909027  | 9.91E-05    | 0.000136329 |
| Z96811.1   | 0.072274722 | 0.299639462 | 2.051664571  | 3.20E-11    | 6.62E-11    |
| RNASET2    | 3.348983639 | 33.49208626 | 3.322025013  | 5.76E-36    | 1.62E-34    |
| TMPRSS4    | 3.195945704 | 0.2410174   | -3.729033687 | 6.20E-38    | 3.55E-36    |
| FCGR3B     | 0.343330288 | 0.977381146 | 1.509324139  | 5.29E-07    | 8.44E-07    |
| RNU6-117P  | 0.477739751 | 1.888190579 | 1.982707557  | 2.52E-09    | 4.65E-09    |
| HLA-DOA    | 8.590774556 | 23.0765818  | 1.425569424  | 3.07E-14    | 7.66E-14    |
| GAPDHP40   | 0.173724772 | 0.447476711 | 1.365009115  | 2.67E-21    | 1.09E-20    |
| AC055855.1 | 0.133914978 | 0.511256362 | 1.932729559  | 9.50E-19    | 3.20E-18    |
| PABPC4L    | 0.880310667 | 2.17809448  | 1.306981882  | 3.91E-16    | 1.10E-15    |
| PON3       | 0.716357046 | 0.30437273  | -1.234839726 | 1.38E-21    | 5.72E-21    |
| FOXI1      | 20.6866531  | 7.522189967 | -1.459475604 | 6.30E-37    | 2.48E-35    |
| LINC01772  | 0.180998189 | 0.481812198 | 1.412495656  | 1.42E-19    | 5.09E-19    |
| AP000897.2 | 0.070933636 | 0.489897744 | 2.787938848  | 2.70E-19    | 9.44E-19    |
| CAT        | 123.5289486 | 51.07843203 | -1.274063028 | 2.08E-33    | 3.19E-32    |
| MIR6793    | 0.055139079 | 0.396389091 | 2.84577018   | 1.82E-10    | 3.60E-10    |
| AC008440.1 | 0.084400214 | 0.263188539 | 1.640778112  | 3.31E-10    | 6.43E-10    |
| ZFHX2      | 0.905388688 | 0.27375043  | -1.72567605  | 1.20E-37    | 6.14E-36    |
| XAF1       | 0.609519072 | 2.512464032 | 2.043359673  | 3.12E-25    | 1.73E-24    |
| CPT1B      | 0.184735431 | 0.680381837 | 1.880884035  | 2.94E-10    | 5.73E-10    |
| RNU1-103P  | 0.184997814 | 0.697977604 | 1.915672524  | 9.12E-12    | 1.95E-11    |
| RNU6-577P  | 0.153842471 | 0.325164483 | 1.079715846  | 0.021411071 | 0.024889116 |
| AC007496.1 | 0.012437263 | 0.23401342  | 4.233850386  | 1.17E-13    | 2.82E-13    |
| ACSF2      | 25.56426811 | 2.721778388 | -3.231507213 | 4.86E-30    | 4.36E-29    |
| RPL10P6    | 3.010269059 | 10.44209538 | 1.794446894  | 4.05E-15    | 1.07E-14    |

Table S1. The differentially expressed genes(DEGs) were screened out in TCGA

| ID         | conMean     | treatMean   | logFC        | pValue      | FDR         |
|------------|-------------|-------------|--------------|-------------|-------------|
| BRD9P2     | 0.107244397 | 0.23937762  | 1.158386002  | 0.007780562 | 0.009358311 |
| SPDEF      | 0.069527114 | 0.433682778 | 2.640992545  | 6.35E-18    | 2.01E-17    |
| PIK3C2G    | 3.18925628  | 0.209681767 | -3.926946714 | 2.84E-40    | 4.56E-38    |
| LRRC36     | 0.171985925 | 0.635806182 | 1.886296539  | 6.19E-24    | 3.08E-23    |
| AC010307.4 | 0.716867117 | 0.149844047 | -2.25824395  | 2.29E-32    | 2.91E-31    |
| PLEKHA3P1  | 0.12334752  | 0.257884688 | 1.063997407  | 4.20E-11    | 8.62E-11    |
| AC087071.2 | 0.507167011 | 0.240650208 | -1.075523238 | 9.85E-21    | 3.83E-20    |
| LINC01936  | 1.747031824 | 0.67050778  | -1.38157991  | 1.88E-27    | 1.27E-26    |
| GRB10      | 6.636349833 | 19.1403704  | 1.528156904  | 1.74E-27    | 1.18E-26    |
| GSTM5      | 0.856967107 | 0.35743376  | -1.261563926 | 2.92E-17    | 8.89E-17    |
| BTN3A1     | 4.190421903 | 15.89480638 | 1.923388032  | 6.04E-37    | 2.39E-35    |
| AC107081.2 | 0.067362323 | 0.309622893 | 2.200498356  | 1.85E-19    | 6.54E-19    |
| TPM1-AS    | 0.146790096 | 0.472097363 | 1.68532979   | 1.26E-16    | 3.66E-16    |
| NLRP6      | 0.614899793 | 1.704630251 | 1.471035615  | 4.05E-10    | 7.82E-10    |
| AC116552.1 | 0.065841347 | 0.324134164 | 2.299525334  | 3.53E-14    | 8.77E-14    |
| RFTN1      | 7.390498125 | 14.94461601 | 1.015882317  | 1.64E-22    | 7.29E-22    |
| ABCB5      | 0.01011622  | 0.236498168 | 4.547086721  | 0.001749748 | 0.00221005  |
| AC087257.2 | 0.045238422 | 0.230682613 | 2.35028876   | 5.37E-15    | 1.41E-14    |
| DDX39B     | 3.716356333 | 11.56706923 | 1.638062629  | 1.67E-19    | 5.93E-19    |
| THBS2      | 8.586893875 | 22.59929661 | 1.396069603  | 7.09E-07    | 1.12E-06    |
| AGAP6      | 0.564174238 | 1.745870308 | 1.629733699  | 8.87E-17    | 2.61E-16    |
| RNU6-759P  | 0.041457168 | 0.5250602   | 3.662789374  | 3.46E-09    | 6.33E-09    |
| POPDC2     | 1.385426447 | 4.176575524 | 1.591990407  | 3.03E-27    | 2.00E-26    |
| AC010997.3 | 0.675294214 | 0.297919583 | -1.180593236 | 4.23E-26    | 2.54E-25    |
| ZGRF1      | 0.161284933 | 0.40170399  | 1.316521121  | 1.03E-24    | 5.47E-24    |
| RN7SL600P  | 0.09030702  | 0.480130983 | 2.410517986  | 2.80E-12    | 6.20E-12    |
| AC113143.1 | 0.057174157 | 0.222412576 | 1.959803277  | 0.00033073  | 0.000439306 |
| AC108704.2 | 0.107932879 | 1.003006723 | 3.21612496   | 2.54E-34    | 4.68E-33    |
| TRIM14     | 4.671600971 | 10.58024683 | 1.179384329  | 6.28E-21    | 2.48E-20    |
| AL512306.2 | 0.12046523  | 0.358205831 | 1.572172021  | 2.49E-07    | 4.04E-07    |
| ARG2       | 37.12929571 | 9.539183227 | -1.960620301 | 2.69E-27    | 1.79E-26    |
| SYNE2      | 14.84510535 | 6.660405529 | -1.156305406 | 3.15E-24    | 1.60E-23    |
| RPS15AP38  | 0.092832743 | 0.239003772 | 1.364327733  | 2.16E-09    | 4.01E-09    |
| MIR378H    | 0.383511097 | 0.939233825 | 1.292216041  | 1.96E-05    | 2.82E-05    |
| AC021744.1 | 1.716990777 | 15.52936538 | 3.177044679  | 8.18E-19    | 2.76E-18    |
| RSPH4A     | 0.495451512 | 0.246293354 | -1.008366172 | 2.00E-17    | 6.14E-17    |
| RPS12P16   | 0.010943952 | 0.244384028 | 4.480944311  | 1.72E-12    | 3.85E-12    |
| AL109615.3 | 0.62872963  | 4.433096658 | 2.81780316   | 2.98E-34    | 5.41E-33    |
| RNU7-40P   | 0.233198582 | 1.551485173 | 2.734018989  | 8.23E-14    | 2.00E-13    |
| GGT2       | 0.138012491 | 0.414069004 | 1.58507237   | 0.00356821  | 0.004404215 |
| AC098869.2 | 0.186934628 | 0.454815231 | 1.282746725  | 2.37E-07    | 3.86E-07    |
| AC084759.3 | 1.596975883 | 0.237425552 | -2.749795413 | 6.34E-30    | 5.60E-29    |
| AC109460.2 | 0.216084534 | 0.790538593 | 1.871240079  | 7.14E-16    | 1.98E-15    |
| NCF1       | 0.251276641 | 1.252014292 | 2.316902564  | 1.34E-31    | 1.48E-30    |
| UQCRC1     | 83.75180597 | 39.0218911  | -1.101836604 | 2.77E-32    | 3.44E-31    |
| SHISA3     | 28.26140581 | 6.635045083 | -2.090655058 | 7.87E-32    | 9.04E-31    |
| MAP3K12    | 0.880634292 | 2.282930324 | 1.3742719    | 2.09E-27    | 1.40E-26    |
| AC023825.2 | 0.01586742  | 0.26004914  | 4.03464477   | 8.88E-25    | 4.75E-24    |
| C1orf116   | 6.549097431 | 0.887432857 | -2.88358622  | 1.43E-35    | 3.60E-34    |
| SPINT1-AS1 | 9.524572819 | 3.958528225 | -1.266690251 | 1.02E-30    | 1.00E-29    |
| AC005154.2 | 0.228774068 | 0.724188804 | 1.662442346  | 1.59E-15    | 4.31E-15    |
| TRIM2      | 26.69296478 | 7.629951613 | -1.806713741 | 2.29E-35    | 5.46E-34    |
| CLK4       | 1.822402832 | 5.295318708 | 1.538875624  | 5.82E-30    | 5.17E-29    |
| RN7SL535P  | 0.060859746 | 0.313521606 | 2.365004656  | 1.45E-17    | 4.51E-17    |
| AL627389.1 | 0.086079593 | 0.225485377 | 1.389290711  | 1.31E-18    | 4.35E-18    |

Table S1. The differentially expressed genes(DEGs) were screened out in TCGA

| ID          | conMean     | treatMean   | logFC        | pValue   | FDR         |
|-------------|-------------|-------------|--------------|----------|-------------|
| CXCR2P1     | 0.083254558 | 2.038551653 | 4.613871437  | 8.02E-31 | 7.95E-30    |
| AC104237.3  | 5.981177639 | 0.248642781 | -4.588283116 | 2.08E-45 | 1.38E-42    |
| AC118344.2  | 0.197144922 | 0.535519975 | 1.441683841  | 2.50E-11 | 5.20E-11    |
| LINC00843   | 0.126403785 | 0.339213074 | 1.424152114  | 3.41E-10 | 6.61E-10    |
| TCAF2       | 0.625867418 | 1.991993867 | 1.670284227  | 1.58E-33 | 2.47E-32    |
| TRGV3       | 0.136668263 | 0.466451619 | 1.771049186  | 5.45E-18 | 1.74E-17    |
| DLEU7       | 0.087213831 | 0.292946653 | 1.748009122  | 6.95E-21 | 2.73E-20    |
| CXCR3       | 0.371623525 | 3.382527768 | 3.18618804   | 3.52E-31 | 3.66E-30    |
| ACAP2-IT1   | 0.180356552 | 0.443900917 | 1.299385855  | 6.70E-08 | 1.13E-07    |
| EHF         | 19.91221951 | 0.525110237 | -5.244889908 | 1.22E-40 | 2.46E-38    |
| AC009269.5  | 0.133608751 | 0.34311089  | 1.360660417  | 9.50E-05 | 0.000130753 |
| AC245884.10 | 0.030319894 | 0.239226194 | 2.980038757  | 1.42E-16 | 4.13E-16    |
| EGLN3       | 4.107289625 | 79.23944973 | 4.269960274  | 9.17E-36 | 2.46E-34    |
| ZNF469      | 0.10559336  | 0.450659405 | 2.093518389  | 7.00E-32 | 8.15E-31    |
| CCNE2       | 0.147261585 | 0.442864299 | 1.588483561  | 1.13E-33 | 1.83E-32    |
| CSPG4P13    | 0.05881242  | 0.367797036 | 2.644717081  | 6.58E-21 | 2.59E-20    |
| RPL10P3     | 0.341681747 | 1.018850855 | 1.576217793  | 1.27E-14 | 3.24E-14    |
| TUBB3       | 0.089289797 | 0.249026016 | 1.47972923   | 8.29E-09 | 1.48E-08    |
| AP007216.2  | 0.039121196 | 0.425048567 | 3.441605311  | 1.23E-27 | 8.44E-27    |
| AC139769.1  | 2.007245099 | 0.479426569 | -2.065835022 | 9.51E-37 | 3.52E-35    |
| AL591866.1  | 0.104986003 | 0.280555422 | 1.418088801  | 1.97E-06 | 3.02E-06    |
| AC079760.1  | 0.111734849 | 0.426652582 | 1.932982567  | 2.78E-10 | 5.43E-10    |
| LINC01055   | 9.400381382 | 0.112579448 | -6.383703907 | 2.10E-20 | 7.97E-20    |
| AC040970.1  | 0.8662459   | 2.006772236 | 1.212028359  | 1.55E-26 | 9.63E-26    |
| SNORD53B    | 0.144463111 | 0.487298034 | 1.754103256  | 6.64E-07 | 1.05E-06    |
| AC093627.7  | 2.051749119 | 0.162971142 | -3.654165902 | 2.65E-32 | 3.32E-31    |
| PROC        | 5.261353549 | 1.422607443 | -1.886896381 | 2.92E-21 | 1.18E-20    |
| P2RY10      | 0.409902844 | 1.636432905 | 1.997200545  | 3.36E-19 | 1.17E-18    |
| TRG-AS1     | 0.110213554 | 0.712890984 | 2.693379825  | 1.82E-35 | 4.46E-34    |
| TMEM262     | 0.099752466 | 0.298375424 | 1.580704306  | 1.61E-24 | 8.41E-24    |
| TFR2        | 0.048947392 | 0.754157325 | 3.945561616  | 5.32E-29 | 4.22E-28    |
| AC091271.1  | 2.864474608 | 1.371242915 | -1.062786383 | 6.41E-21 | 2.53E-20    |
| ST6GALNAC2  | 2.497369397 | 0.903703096 | -1.466488463 | 1.05E-32 | 1.42E-31    |
| AC008982.2  | 0.147223165 | 0.604220638 | 2.037070767  | 1.18E-17 | 3.67E-17    |
| SQOR        | 7.979041611 | 19.25597784 | 1.271019011  | 3.77E-37 | 1.62E-35    |
| EXOC3L1     | 1.931327681 | 5.710508641 | 1.564026292  | 2.94E-26 | 1.79E-25    |
| CENPA       | 0.131554968 | 0.704125775 | 2.420167428  | 4.13E-33 | 6.03E-32    |
| CLDN8       | 70.92163653 | 5.737231068 | -3.627799298 | 2.01E-40 | 3.58E-38    |
| PRSS8       | 44.46200105 | 13.2332334  | -1.748407268 | 1.87E-32 | 2.42E-31    |
| AL033381.2  | 0.584899944 | 1.74070007  | 1.573405885  | 1.94E-05 | 2.80E-05    |
| AC074138.1  | 0.122540259 | 0.280014795 | 1.192247257  | 2.08E-08 | 3.62E-08    |
| KNDC1       | 0.347793145 | 1.074996977 | 1.628031201  | 1.23E-05 | 1.80E-05    |
| SNHG28      | 0.773819251 | 0.313936073 | -1.301525808 | 5.70E-28 | 4.04E-27    |
| LINC02343   | 1.984954556 | 0.084774488 | -4.549332002 | 2.74E-54 | 6.27E-51    |
| MIR99AHG    | 1.903442258 | 0.763131988 | -1.3186063   | 1.95E-31 | 2.10E-30    |
| FBXO21      | 21.66202903 | 10.69090545 | -1.018784338 | 1.42E-31 | 1.56E-30    |
| GSTM3       | 60.00433532 | 5.961968865 | -3.331205993 | 4.21E-41 | 1.14E-38    |
| AC091133.5  | 0.138598709 | 0.360128691 | 1.37759872   | 1.79E-10 | 3.53E-10    |
| PRND        | 0.17529766  | 1.657114571 | 3.240794707  | 1.02E-17 | 3.18E-17    |
| RN7SL113P   | 0.050338546 | 0.307341317 | 2.610106278  | 4.69E-17 | 1.40E-16    |
| AC010976.2  | 0.325060491 | 1.117177548 | 1.781078362  | 1.13E-07 | 1.88E-07    |
| CAPN12      | 0.563160472 | 5.200120577 | 3.206927095  | 9.63E-32 | 1.09E-30    |
| NEK6        | 7.426096165 | 30.81438683 | 2.052928181  | 1.28E-34 | 2.54E-33    |
| FOLH1B      | 1.678498696 | 0.226809007 | -2.887621576 | 1.08E-09 | 2.03E-09    |
| PAM16       | 1.464392424 | 2.988883157 | 1.029304285  | 2.38E-25 | 1.33E-24    |

Table S1. The differentially expressed genes(DEGs) were screened out in TCGA

| ID         | conMean     | treatMean   | logFC        | pValue      | FDR         |
|------------|-------------|-------------|--------------|-------------|-------------|
| TRIM9      | 0.273619809 | 2.002291953 | 2.871407761  | 1.05E-33    | 1.71E-32    |
| SLC4A11    | 13.40310863 | 0.575731736 | -4.5410271   | 3.70E-37    | 1.59E-35    |
| AL391280.1 | 0.09068524  | 0.234193481 | 1.368761249  | 4.27E-17    | 1.28E-16    |
| MYO15B     | 3.354788324 | 10.8815231  | 1.697586862  | 2.18E-21    | 8.93E-21    |
| AL121890.5 | 0.105799903 | 0.233856704 | 1.144286476  | 1.51E-06    | 2.34E-06    |
| BSPRY      | 11.76628496 | 2.661294087 | -2.144459031 | 2.73E-36    | 8.38E-35    |
| HADH       | 52.33342792 | 15.4898121  | -1.756413117 | 6.35E-40    | 8.61E-38    |
| PRSS35     | 4.475548983 | 0.971317928 | -2.204049163 | 1.25E-27    | 8.52E-27    |
| AC005534.2 | 0.12837751  | 0.332460793 | 1.372791726  | 1.17E-08    | 2.08E-08    |
| AL109809.1 | 0.026992176 | 0.261042729 | 3.273672788  | 1.49E-33    | 2.35E-32    |
| OR7E47P    | 0.535337151 | 3.257646792 | 2.605310508  | 1.34E-24    | 7.07E-24    |
| AC025766.1 | 0.122195837 | 0.545379563 | 2.158065508  | 8.07E-18    | 2.54E-17    |
| TGFBI      | 31.25246186 | 219.1229792 | 2.809699041  | 4.43E-24    | 2.23E-23    |
| AC007842.1 | 0.300455705 | 0.821949961 | 1.451898253  | 2.08E-19    | 7.34E-19    |
| ADGRA2     | 4.183515931 | 10.73574461 | 1.359634423  | 3.55E-19    | 1.23E-18    |
| ADAP2      | 1.960937588 | 7.322837378 | 1.900859139  | 2.89E-37    | 1.29E-35    |
| AC148477.2 | 0.62095348  | 0.1488674   | -2.060457337 | 9.06E-29    | 7.01E-28    |
| PTCHD4     | 0.493627612 | 1.048110807 | 1.086296246  | 6.69E-06    | 9.94E-06    |
| LINC01801  | 0.279712795 | 0.57717388  | 1.045059763  | 0.000624417 | 0.000813381 |
| HLA-DPB2   | 0.304300758 | 1.970213627 | 2.694782234  | 4.89E-21    | 1.95E-20    |
| LINC02285  | 0.100155606 | 0.365721441 | 1.868502036  | 1.37E-27    | 9.33E-27    |
| AC009690.2 | 0.17513302  | 0.475816452 | 1.44195404   | 4.45E-18    | 1.43E-17    |
| AL158152.1 | 0.072020403 | 0.22281879  | 1.629393319  | 0.000646346 | 0.000841042 |
| AC127024.6 | 0.154771665 | 0.367386644 | 1.247157803  | 1.62E-09    | 3.03E-09    |
| RN7SL417P  | 0.122975301 | 0.367531067 | 1.579497617  | 0.000237075 | 0.000318119 |
| GOLGA7B    | 0.058314108 | 0.810004702 | 3.796013417  | 9.34E-37    | 3.47E-35    |
| KLHL13     | 7.601908514 | 1.672901179 | -2.184009438 | 5.16E-40    | 7.48E-38    |
| THBS3      | 2.824244819 | 6.733152869 | 1.253417066  | 3.20E-27    | 2.11E-26    |
| AC016590.2 | 0.192845072 | 0.511099379 | 1.40616156   | 1.75E-06    | 2.70E-06    |
| NAV2       | 6.161523861 | 2.043306737 | -1.592381406 | 9.42E-36    | 2.50E-34    |
| H2AFY2     | 11.82278849 | 4.995257029 | -1.242939527 | 4.01E-32    | 4.85E-31    |
| MEI1       | 0.208586488 | 0.542857916 | 1.379928937  | 8.83E-13    | 2.01E-12    |
| AC137932.2 | 0.071188117 | 0.368174783 | 2.370682473  | 4.18E-32    | 5.05E-31    |
| FSTL4      | 1.11280488  | 0.194508112 | -2.516298421 | 1.27E-34    | 2.53E-33    |
| LINC01943  | 0.084571732 | 0.766338206 | 3.179733805  | 4.25E-38    | 2.60E-36    |
| AC092809.4 | 0.057033867 | 0.339361894 | 2.572933821  | 9.38E-34    | 1.54E-32    |
| AL596442.2 | 0.150026935 | 1.039194333 | 2.792172025  | 9.52E-28    | 6.57E-27    |
| AL357079.1 | 0.710026919 | 1.590742289 | 1.1637545    | 1.11E-16    | 3.26E-16    |
| AC005274.1 | 0.049091158 | 0.254390025 | 2.373507011  | 3.66E-14    | 9.10E-14    |
| PABPC1L    | 0.912772401 | 4.341193613 | 2.249764691  | 2.18E-16    | 6.26E-16    |
| SNORD14A   | 0.824523808 | 3.752927079 | 2.186383201  | 1.72E-19    | 6.11E-19    |
| RNA5SP201  | 0.124874732 | 0.419099597 | 1.746811549  | 2.23E-08    | 3.88E-08    |
| SUSD2      | 14.77576522 | 5.425145705 | -1.445499058 | 0.000286828 | 0.000382711 |
| RASSF6     | 3.222481125 | 7.79379063  | 1.274153268  | 1.76E-21    | 7.28E-21    |
| AC005332.1 | 0.054997057 | 0.306993464 | 2.480781619  | 6.54E-21    | 2.57E-20    |
| RALGDS     | 3.841135347 | 8.493245242 | 1.144783108  | 2.98E-32    | 3.68E-31    |
| GSN-AS1    | 0.099350257 | 0.238379881 | 1.262666875  | 8.11E-05    | 0.000112143 |
| PTGS2      | 5.727144401 | 2.5058454   | -1.19251857  | 2.04E-14    | 5.15E-14    |
| P2RY8      | 2.062411426 | 7.683752404 | 1.89747887   | 1.68E-27    | 1.13E-26    |
| RNU7-186P  | 0.342620088 | 0.849128762 | 1.309373602  | 0.000206812 | 0.000278491 |
| DNAJC28    | 1.549196669 | 0.711158115 | -1.123278044 | 5.90E-29    | 4.66E-28    |
| AL161452.1 | 0.058053673 | 0.246043353 | 2.083453281  | 1.59E-19    | 5.66E-19    |
| IGHV1-45   | 0.275815979 | 1.177627542 | 2.094105374  | 0.000269995 | 0.000360928 |
| TCF4       | 2.421118306 | 5.597280726 | 1.20905253   | 2.84E-18    | 9.22E-18    |
| IL2RB      | 0.763775293 | 6.259662302 | 3.034864672  | 4.52E-37    | 1.88E-35    |

Table S1. The differentially expressed genes(DEGs) were screened out in TCGA

| ID         | conMean     | treatMean   | logFC        | pValue      | FDR         |
|------------|-------------|-------------|--------------|-------------|-------------|
| AC006033.2 | 0.1086273   | 0.542931742 | 2.321384106  | 3.91E-33    | 5.73E-32    |
| ADGRF3     | 1.530784345 | 0.130491041 | -3.552248384 | 3.59E-39    | 3.28E-37    |
| AL451060.1 | 0.466240498 | 0.182371872 | -1.354191091 | 6.39E-23    | 2.94E-22    |
| SCML4      | 0.10433144  | 0.269414173 | 1.368651769  | 4.17E-15    | 1.10E-14    |
| BIK        | 1.812636838 | 0.694838813 | -1.383339661 | 1.38E-30    | 1.32E-29    |
| CLMN       | 9.709497292 | 3.850642045 | -1.334297586 | 3.39E-35    | 7.72E-34    |
| RN7SKP22   | 0.054283025 | 0.249910879 | 2.202840694  | 3.34E-07    | 5.39E-07    |
| AC138956.1 | 0.2669516   | 0.903600354 | 1.759106639  | 7.10E-17    | 2.10E-16    |
| RHBG       | 5.482258416 | 1.582699103 | -1.792383332 | 2.40E-36    | 7.49E-35    |
| AC018541.1 | 1.588500415 | 0.146668823 | -3.437031325 | 6.49E-32    | 7.59E-31    |
| SLC9A3-AS1 | 1.743309179 | 14.67071627 | 3.073038947  | 8.87E-19    | 2.99E-18    |
| AL135960.1 | 0.063127817 | 0.244164479 | 1.951505558  | 1.49E-10    | 2.95E-10    |
| SLFNL1-AS1 | 0.079033619 | 0.361954744 | 2.195270948  | 1.53E-22    | 6.81E-22    |
| TRBV29-1   | 0.375992816 | 2.167340172 | 2.527148604  | 5.79E-21    | 2.29E-20    |
| TRAV8-1    | 0.078945269 | 0.38536212  | 2.287290054  | 1.50E-13    | 3.58E-13    |
| AC007639.1 | 0.065388545 | 0.503103809 | 2.943746282  | 5.68E-19    | 1.94E-18    |
| RPS2       | 116.2507789 | 313.8427391 | 1.43280145   | 2.30E-36    | 7.23E-35    |
| RPS27AP10  | 0.032926683 | 0.317158388 | 3.267874425  | 3.20E-10    | 6.22E-10    |
| PIK3R5     | 0.361425004 | 2.584320304 | 2.838016668  | 1.00E-37    | 5.28E-36    |
| AC018816.1 | 0.359561465 | 1.112675037 | 1.629721988  | 2.15E-24    | 1.11E-23    |
| APOC2      | 0.088198234 | 0.442778635 | 2.327763932  | 8.96E-16    | 2.47E-15    |
| NNT        | 29.40260222 | 12.24080903 | -1.264244931 | 2.96E-33    | 4.40E-32    |
| ZFPM2-AS1  | 0.396056096 | 1.701299423 | 2.102860385  | 6.01E-19    | 2.05E-18    |
| VN1R85P    | 0.604632137 | 0.276403918 | -1.129279597 | 2.53E-22    | 1.11E-21    |
| TM7SF2     | 11.3594711  | 5.460770678 | -1.056719186 | 4.95E-29    | 3.95E-28    |
| LINC02544  | 0.078981742 | 0.334781267 | 2.083627705  | 7.73E-13    | 1.77E-12    |
| AP003774.1 | 0.106766339 | 0.259899728 | 1.28349825   | 4.48E-17    | 1.34E-16    |
| LINC01235  | 0.507236878 | 4.217569472 | 3.055680289  | 5.88E-28    | 4.16E-27    |
| IGHV3-7    | 0.800938598 | 2.448886886 | 1.612362587  | 0.002168932 | 0.002718824 |
| AC011374.2 | 0.65405485  | 1.516890777 | 1.213633676  | 1.09E-21    | 4.56E-21    |
| AC005730.3 | 0.060561211 | 0.248296163 | 2.035596005  | 7.69E-10    | 1.46E-09    |
| AC008750.1 | 0.018696014 | 0.310398634 | 4.05331959   | 7.45E-30    | 6.50E-29    |
| AC073335.2 | 0.866312332 | 2.634192653 | 1.604401702  | 8.71E-18    | 2.74E-17    |
| FBXO2      | 12.82711423 | 2.0297757   | -2.659804421 | 8.60E-34    | 1.43E-32    |
| HPGD       | 10.93876474 | 2.548996387 | -2.101448597 | 1.99E-29    | 1.66E-28    |
| P4HA1      | 16.37654519 | 53.63917231 | 1.711655938  | 2.77E-34    | 5.06E-33    |
| AL353622.1 | 0.656716151 | 1.36634076  | 1.05697549   | 0.000336192 | 0.000446261 |
| PAQR4      | 0.73026084  | 2.427552069 | 1.733018466  | 7.92E-31    | 7.85E-30    |
| EBF3       | 0.35716588  | 1.150825616 | 1.688003066  | 5.02E-15    | 1.32E-14    |
| HMG1P17    | 1.090400898 | 0.139149509 | -2.970150928 | 1.57E-34    | 3.05E-33    |
| AL158151.1 | 0.116150172 | 0.308073828 | 1.407284833  | 2.95E-18    | 9.56E-18    |
| TMEM273    | 1.481625446 | 3.707658496 | 1.323327586  | 5.86E-23    | 2.70E-22    |
| TRBV5-6    | 0.114617708 | 0.736621355 | 2.684093268  | 1.11E-19    | 4.00E-19    |
| POU2F2     | 0.37479018  | 1.434952726 | 1.936848152  | 6.12E-28    | 4.32E-27    |
| AL359881.1 | 0.22930959  | 0.83003986  | 1.855883927  | 5.26E-08    | 8.93E-08    |
| AC105052.2 | 0.20876527  | 0.43714477  | 1.066229415  | 6.17E-13    | 1.42E-12    |
| IYD        | 4.423878008 | 0.238376528 | -4.213997512 | 3.37E-29    | 2.74E-28    |
| VWA8       | 9.027156764 | 4.199925602 | -1.103907889 | 5.92E-33    | 8.35E-32    |
| AC096733.2 | 1.7752      | 0.632467944 | -1.488917308 | 1.26E-32    | 1.68E-31    |
| PRSS22     | 2.439815783 | 0.244630086 | -3.31809847  | 1.54E-36    | 5.24E-35    |
| PGF        | 1.895384371 | 29.09362359 | 3.940140642  | 1.71E-35    | 4.23E-34    |
| AC009237.8 | 2.240744128 | 0.703462564 | -1.67143236  | 1.64E-21    | 6.80E-21    |
| AC009549.1 | 0.273816426 | 1.40451562  | 2.358791766  | 1.63E-31    | 1.78E-30    |
| WASH7P     | 0.325540332 | 0.87989231  | 1.43449067   | 1.79E-20    | 6.84E-20    |
| TRBC2      | 2.576459104 | 18.20364254 | 2.820765564  | 5.03E-29    | 4.00E-28    |



Table S1. The differentially expressed genes(DEGs) were screened out in TCGA

| ID         | conMean     | treatMean   | logFC        | pValue      | FDR         |
|------------|-------------|-------------|--------------|-------------|-------------|
| ATP6V0E2-A | 1.195025093 | 0.498374701 | -1.261738172 | 1.62E-26    | 1.00E-25    |
| IGLON5     | 0.448483657 | 2.641338327 | 2.55814179   | 1.32E-21    | 5.49E-21    |
| AC139100.2 | 0.276792594 | 0.989477556 | 1.83786164   | 5.48E-17    | 1.63E-16    |
| AC005154.4 | 0.110775601 | 0.419301689 | 1.920348488  | 1.74E-16    | 5.03E-16    |
| SLC10A6    | 0.140673225 | 0.908405767 | 2.690989102  | 9.38E-29    | 7.24E-28    |
| BLOC1S1-RD | 0.272422906 | 1.129101781 | 2.051255621  | 2.19E-34    | 4.11E-33    |
| ATAD3B     | 0.543577647 | 1.479137052 | 1.444197698  | 7.57E-16    | 2.10E-15    |
| COL6A3     | 4.669706067 | 12.03402667 | 1.365715812  | 5.96E-11    | 1.21E-10    |
| KRBA1      | 1.820098521 | 12.81021815 | 2.815206595  | 4.16E-37    | 1.75E-35    |
| ANO4       | 0.154154371 | 2.038379574 | 3.724975027  | 6.75E-28    | 4.74E-27    |
| CILP       | 0.885668187 | 0.425556052 | -1.057417131 | 6.72E-20    | 2.46E-19    |
| KCNN4      | 0.325663654 | 0.927194318 | 1.50948901   | 4.65E-20    | 1.72E-19    |
| PLA2G4F    | 6.118355944 | 1.057549357 | -2.532419044 | 2.09E-36    | 6.67E-35    |
| FGR        | 1.999401647 | 5.741111935 | 1.521761869  | 1.98E-28    | 1.47E-27    |
| HLA-DMA    | 20.48890526 | 57.94869739 | 1.499933329  | 3.00E-30    | 2.76E-29    |
| CYP24A1    | 7.117859816 | 2.884707878 | -1.303018289 | 4.15E-17    | 1.25E-16    |
| AC027601.3 | 0.159391575 | 0.330296218 | 1.051185074  | 1.26E-07    | 2.08E-07    |
| DNASE1     | 6.917358171 | 1.228918906 | -2.492831441 | 5.91E-32    | 6.98E-31    |
| HMOX1      | 24.87096883 | 128.4014111 | 2.368126444  | 1.97E-32    | 2.54E-31    |
| SNORD11    | 0.138390061 | 0.489885    | 1.823702783  | 1.32E-06    | 2.05E-06    |
| ALDH1B1    | 33.73385857 | 14.48256156 | -1.21988055  | 2.00E-17    | 6.14E-17    |
| MARVELD2   | 11.71952297 | 2.21833284  | -2.401366098 | 4.75E-39    | 4.02E-37    |
| AL121760.1 | 0.068338329 | 0.384618514 | 2.492661336  | 1.14E-25    | 6.60E-25    |
| ABCG2      | 2.185107588 | 4.447830453 | 1.02539748   | 3.19E-06    | 4.84E-06    |
| AC087286.2 | 0.260310658 | 0.593216748 | 1.188324947  | 2.98E-07    | 4.82E-07    |
| AC004263.1 | 0.03976167  | 0.266426599 | 2.744287858  | 2.39E-16    | 6.84E-16    |
| AC073636.1 | 0.079442661 | 0.280968039 | 1.822420181  | 1.92E-16    | 5.54E-16    |
| NAP1L2     | 7.8309385   | 1.674522319 | -2.225435612 | 1.57E-37    | 7.68E-36    |
| RASGEF1A   | 0.781237038 | 1.608797951 | 1.042150897  | 3.01E-05    | 4.28E-05    |
| GRIK4      | 0.094151587 | 0.295100256 | 1.64814785   | 0.000226616 | 0.000304542 |
| AL031719.2 | 0.333552738 | 1.262468026 | 1.920260062  | 3.28E-28    | 2.39E-27    |
| AC005632.2 | 0.315213718 | 0.823502964 | 1.38544352   | 3.70E-25    | 2.04E-24    |
| AP005019.1 | 0.112589153 | 0.353161506 | 1.649260257  | 1.19E-19    | 4.27E-19    |
| LNCTAM34A  | 0.366132159 | 1.55309642  | 2.084710995  | 2.27E-35    | 5.43E-34    |
| TNNC1      | 5.631231013 | 0.540819838 | -3.380230359 | 7.86E-39    | 6.13E-37    |
| ATP6V1C2   | 7.384937193 | 1.767208491 | -2.063113396 | 2.16E-36    | 6.88E-35    |
| AC004908.2 | 0.510546921 | 1.043389972 | 1.031163013  | 6.00E-08    | 1.02E-07    |
| ATP6V0E2   | 21.10343333 | 8.494383992 | -1.312896498 | 1.42E-31    | 1.56E-30    |
| NFAM1      | 0.668158324 | 2.910535405 | 2.123022665  | 5.15E-34    | 8.92E-33    |
| NLRP3      | 0.569211841 | 1.490087104 | 1.388359088  | 2.17E-20    | 8.21E-20    |
| C5AR1      | 3.605503958 | 9.359148153 | 1.376176299  | 3.16E-23    | 1.49E-22    |
| LINC01780  | 0.850135904 | 0.244153942 | -1.799902419 | 2.65E-19    | 9.29E-19    |
| MSX1       | 0.870650244 | 2.215667161 | 1.347575991  | 6.37E-24    | 3.17E-23    |
| AC127024.5 | 0.722971213 | 1.541385173 | 1.092217311  | 3.93E-11    | 8.08E-11    |
| AL451050.2 | 0.0839342   | 0.246672464 | 1.555265995  | 5.27E-09    | 9.53E-09    |
| AC080013.3 | 0.089547583 | 0.296640168 | 1.727987571  | 6.32E-10    | 1.21E-09    |
| MAPK12     | 0.772506765 | 1.928050374 | 1.319523273  | 2.34E-07    | 3.81E-07    |
| ICOS       | 0.068278474 | 0.728396481 | 3.415221227  | 1.60E-31    | 1.75E-30    |
| FCGR1B     | 0.069804065 | 0.506991688 | 2.860579146  | 1.18E-35    | 3.03E-34    |
| AC145423.3 | 0.344614693 | 0.756802161 | 1.134931996  | 1.05E-06    | 1.64E-06    |
| AC112484.1 | 0.149920898 | 0.330024369 | 1.138371054  | 4.56E-12    | 9.94E-12    |
| SEC31B     | 0.327714919 | 1.075291458 | 1.714214498  | 4.50E-11    | 9.20E-11    |
| ENTPD8     | 1.445470081 | 0.43740238  | -1.724505773 | 2.62E-25    | 1.46E-24    |
| HOXB8      | 17.58115351 | 3.680588199 | -2.256021482 | 4.52E-34    | 7.94E-33    |
| LINC01730  | 0.055357133 | 0.26712062  | 2.270650227  | 7.35E-18    | 2.32E-17    |

Table S1. The differentially expressed genes(DEGs) were screened out in TCGA

| ID         | conMean     | treatMean   | logFC        | pValue      | FDR         |
|------------|-------------|-------------|--------------|-------------|-------------|
| C5         | 1.98548505  | 0.974544859 | -1.026690998 | 2.91E-32    | 3.60E-31    |
| C5orf38    | 3.068163514 | 0.499474362 | -2.61889284  | 7.31E-34    | 1.23E-32    |
| AC093535.1 | 0.2093187   | 0.560924637 | 1.422105744  | 3.46E-14    | 8.61E-14    |
| PRAME      | 0.581748643 | 3.950837208 | 2.763690558  | 0.000466427 | 0.000613009 |
| SHMT2      | 11.77514142 | 46.41954134 | 1.978987881  | 1.22E-37    | 6.22E-36    |
| SHC3       | 0.59571092  | 0.209852883 | -1.505234119 | 1.71E-25    | 9.76E-25    |
| IGLV2-28   | 0.351235892 | 0.831140377 | 1.242651888  | 0.000376258 | 0.000497681 |
| SLC16A3    | 3.891058964 | 31.64135822 | 3.023576782  | 2.24E-37    | 1.04E-35    |
| MMP25      | 0.159609838 | 0.757231273 | 2.246184413  | 8.90E-34    | 1.48E-32    |
| APOBR      | 1.117356768 | 3.537443977 | 1.662617393  | 8.53E-26    | 4.98E-25    |
| S100A5     | 0.95986352  | 0.320581968 | -1.582136007 | 1.95E-28    | 1.45E-27    |
| AC018648.1 | 0.059203504 | 0.25742098  | 2.12037518   | 1.33E-17    | 4.14E-17    |
| RNU6-431P  | 0.123169206 | 0.48117558  | 1.965921817  | 1.39E-12    | 3.12E-12    |
| LINC02555  | 0.063150592 | 0.362904438 | 2.522721526  | 6.19E-14    | 1.52E-13    |
| ACAA1      | 20.18380894 | 6.799000942 | -1.56980378  | 7.74E-32    | 8.91E-31    |
| BX547991.1 | 2.65848761  | 0.332068375 | -3.001053505 | 2.29E-34    | 4.25E-33    |
| LINC00893  | 0.168802925 | 0.800961054 | 2.246392189  | 9.65E-17    | 2.83E-16    |
| XCL1       | 0.196233068 | 1.000537621 | 2.350135332  | 2.24E-23    | 1.07E-22    |
| COL9A3     | 0.527573412 | 0.203424129 | -1.374881045 | 9.92E-21    | 3.86E-20    |
| PRKCQ-AS1  | 2.779532613 | 0.917097311 | -1.599695582 | 2.80E-23    | 1.32E-22    |
| SLC15A4    | 4.914226486 | 17.68454055 | 1.847452483  | 5.57E-39    | 4.64E-37    |
| HAMP       | 0.042262231 | 0.565979605 | 3.74330925   | 2.84E-29    | 2.33E-28    |
| AC110749.1 | 0.087058455 | 0.38947601  | 2.161478149  | 6.85E-10    | 1.31E-09    |
| AACSP1     | 0.20234816  | 0.672706112 | 1.733136633  | 4.33E-11    | 8.86E-11    |
| MS4A14     | 0.119300338 | 1.1070036   | 3.213989882  | 4.52E-36    | 1.30E-34    |
| PPEF1      | 0.044016187 | 0.286455638 | 2.702205654  | 3.13E-28    | 2.28E-27    |
| AC007342.4 | 1.316497929 | 0.173546817 | -2.923308443 | 9.65E-37    | 3.55E-35    |
| PROZ       | 4.27465719  | 0.243415444 | -4.134316116 | 4.72E-21    | 1.88E-20    |
| AC007283.2 | 0.205348121 | 0.892044764 | 2.119044365  | 7.02E-16    | 1.95E-15    |
| SMCO3      | 1.524416775 | 0.695489438 | -1.132156879 | 4.99E-19    | 1.71E-18    |
| DNASE1L3   | 10.32917564 | 2.346363889 | -2.138226441 | 5.14E-35    | 1.13E-33    |
| AL645929.1 | 2.079993101 | 6.34009256  | 1.607925159  | 4.48E-21    | 1.79E-20    |
| AL021154.1 | 0.173317843 | 0.441543001 | 1.349133762  | 3.20E-11    | 6.61E-11    |
| AC015660.2 | 0.303284273 | 1.177231154 | 1.956655033  | 6.67E-16    | 1.86E-15    |
| AATK       | 0.349075151 | 0.939531148 | 1.428403329  | 3.54E-23    | 1.66E-22    |
| AL035420.3 | 0.613909382 | 0.252772902 | -1.280183909 | 1.17E-20    | 4.53E-20    |
| CCNYL2     | 0.083645897 | 0.620798665 | 2.891758779  | 7.70E-18    | 2.43E-17    |
| NOX4       | 13.94177603 | 5.867594815 | -1.248573201 | 0.003417254 | 0.004223461 |
| ARL4AP4    | 0.077466334 | 0.248901636 | 1.683934347  | 1.14E-05    | 1.67E-05    |
| CLCNKA     | 71.58846046 | 1.768176081 | -5.339393199 | 1.73E-39    | 1.90E-37    |
| AC097641.2 | 0.191838032 | 0.448573126 | 1.225454431  | 3.47E-11    | 7.16E-11    |
| METTTL27   | 2.939905196 | 6.192419188 | 1.074733504  | 3.21E-09    | 5.87E-09    |
| AC093520.2 | 0.007361274 | 0.251314751 | 5.09339615   | 6.36E-22    | 2.71E-21    |
| ASIC3      | 0.110392172 | 0.45563984  | 2.045256023  | 9.38E-20    | 3.40E-19    |
| AC087239.1 | 0.123115105 | 0.428898151 | 1.800627322  | 6.87E-14    | 1.68E-13    |
| C9orf66    | 7.224883804 | 3.452072416 | -1.065511656 | 0.006028647 | 0.007310076 |
| AC091390.4 | 0.27786212  | 0.651427433 | 1.229235304  | 1.59E-21    | 6.58E-21    |
| AP003774.4 | 0.049876446 | 0.313073229 | 2.650069577  | 1.90E-25    | 1.07E-24    |
| AL671277.1 | 5.187417128 | 14.56326379 | 1.489245427  | 2.97E-09    | 5.45E-09    |
| NABP1      | 0.775289272 | 1.799856428 | 1.215075222  | 1.72E-16    | 4.97E-16    |
| CENPU      | 0.648318814 | 2.289110771 | 1.820011932  | 2.39E-34    | 4.42E-33    |
| IGHG4      | 25.72455506 | 57.58469046 | 1.162539182  | 0.001218361 | 0.001558182 |
| RPS6P25    | 0.20194271  | 0.415725833 | 1.041686333  | 1.51E-13    | 3.60E-13    |
| CFAP58-DT  | 0.286627775 | 0.642542017 | 1.164612378  | 2.21E-13    | 5.24E-13    |
| RN7SL541P  | 0.043282614 | 0.596650087 | 3.785025556  | 2.47E-24    | 1.27E-23    |

Table S1. The differentially expressed genes(DEGs) were screened out in TCGA

| ID         | conMean     | treatMean   | logFC        | pValue      | FDR         |
|------------|-------------|-------------|--------------|-------------|-------------|
| ADGRV1     | 0.80948881  | 0.125403046 | -2.690438748 | 6.71E-36    | 1.85E-34    |
| BX539320.1 | 0.200132513 | 0.698220653 | 1.802727466  | 3.18E-23    | 1.49E-22    |
| AC105105.1 | 0.036781249 | 0.405513804 | 3.462708645  | 3.24E-26    | 1.96E-25    |
| DNAJC22    | 4.911636639 | 10.98375696 | 1.161095868  | 3.56E-21    | 1.43E-20    |
| MIR5188    | 0.087557131 | 0.378108294 | 2.110502918  | 8.22E-13    | 1.88E-12    |
| TWIST1     | 0.287428117 | 0.650246359 | 1.177785217  | 1.12E-08    | 1.98E-08    |
| TRPC7-AS1  | 1.779276338 | 0.499540343 | -1.832617493 | 4.71E-10    | 9.05E-10    |
| RNU4-78P   | 0.144739417 | 0.447346096 | 1.627933557  | 8.37E-07    | 1.32E-06    |
| AC073218.2 | 0.106479487 | 3.861052261 | 5.180346648  | 5.96E-33    | 8.39E-32    |
| TROAP      | 0.122923936 | 0.853685216 | 2.795938327  | 1.47E-35    | 3.69E-34    |
| CGREF1     | 0.912822861 | 7.771962178 | 3.089872051  | 2.93E-31    | 3.08E-30    |
| CASP5      | 0.03871163  | 0.30118713  | 2.959821148  | 3.19E-32    | 3.92E-31    |
| TNFRSF14   | 5.158948625 | 23.1763763  | 2.167506029  | 1.00E-38    | 7.50E-37    |
| CREB3L3    | 1.220201108 | 8.002731616 | 2.713373581  | 2.74E-19    | 9.59E-19    |
| AC005034.4 | 0.749171785 | 0.227147565 | -1.721666728 | 1.01E-28    | 7.75E-28    |
| AP000523.1 | 0.03204746  | 0.283348377 | 3.144294995  | 1.86E-29    | 1.55E-28    |
| AC141557.2 | 0.034163917 | 0.358754161 | 3.392450264  | 6.74E-22    | 2.86E-21    |
| LINC00626  | 0.13962712  | 2.035359276 | 3.865632388  | 1.68E-07    | 2.76E-07    |
| RAD54B     | 0.24522626  | 0.513721591 | 1.066873233  | 1.40E-12    | 3.15E-12    |
| Z97192.2   | 0.103600399 | 0.215235684 | 1.054887726  | 2.42E-05    | 3.46E-05    |
| AC004951.3 | 0.095118798 | 0.339192163 | 1.834300455  | 4.42E-19    | 1.52E-18    |
| IRX3       | 8.751928    | 24.73171345 | 1.498689421  | 5.75E-21    | 2.27E-20    |
| ODF3B      | 1.017547711 | 11.73498163 | 3.527647236  | 6.74E-38    | 3.80E-36    |
| HRG        | 10.93005619 | 2.354339139 | -2.21490676  | 7.84E-42    | 2.83E-39    |
| NCR1       | 0.050670735 | 0.327064827 | 2.690351947  | 8.14E-32    | 9.33E-31    |
| IQGAP3     | 0.260562429 | 1.461545535 | 2.487793796  | 4.99E-33    | 7.17E-32    |
| DARS       | 24.29280306 | 51.16707017 | 1.07468666   | 7.12E-32    | 8.27E-31    |
| PPP1R14D   | 1.857774729 | 7.596455524 | 2.031750846  | 0.005797606 | 0.007041123 |
| ACAN       | 0.723247813 | 4.431471681 | 2.615223933  | 2.78E-24    | 1.42E-23    |
| PNPLA1     | 1.718769045 | 0.322536761 | -2.413840195 | 7.73E-11    | 1.56E-10    |
| AP003555.2 | 0.027965087 | 0.437592764 | 3.967890182  | 8.79E-35    | 1.81E-33    |
| TNFAIP8L2  | 1.337980286 | 6.368755729 | 2.25095468   | 2.21E-34    | 4.14E-33    |
| EIF5AP3    | 0.028420873 | 0.33066148  | 3.540332227  | 1.84E-25    | 1.05E-24    |
| FCMR       | 1.434301263 | 4.047076591 | 1.496532071  | 9.13E-22    | 3.84E-21    |
| GLTP       | 48.31644542 | 23.18606296 | -1.059256453 | 1.83E-24    | 9.55E-24    |
| PYCARD     | 2.459117529 | 9.994204781 | 2.022951091  | 1.14E-30    | 1.11E-29    |
| ABCA1      | 3.708622333 | 11.2231736  | 1.597525424  | 2.81E-31    | 2.97E-30    |
| BTLA       | 0.124086365 | 0.34512765  | 1.475785466  | 8.91E-15    | 2.30E-14    |
| BMS1P1     | 0.36112876  | 0.729698012 | 1.014786204  | 9.46E-09    | 1.68E-08    |
| AD001527.1 | 0.127593695 | 0.576003892 | 2.174521519  | 4.91E-13    | 1.14E-12    |
| RPS14P8    | 0.472891084 | 1.062518495 | 1.167908108  | 4.16E-05    | 5.87E-05    |
| AL137009.1 | 0.478427786 | 0.210880055 | -1.181878527 | 4.72E-14    | 1.16E-13    |
| LY6H       | 0.117695956 | 1.230300631 | 3.385874235  | 6.33E-22    | 2.70E-21    |
| IDSP1      | 0.081542266 | 0.302084381 | 1.88933163   | 1.00E-06    | 1.57E-06    |
| AC093690.1 | 0.061226114 | 0.261658656 | 2.095466971  | 2.48E-21    | 1.01E-20    |
| UBD        | 2.812574586 | 26.43713419 | 3.232602535  | 1.02E-26    | 6.46E-26    |
| AL590822.1 | 0.088636204 | 0.768604924 | 3.116274215  | 3.93E-12    | 8.60E-12    |
| FGF1       | 26.41248142 | 1.479408148 | -4.158127816 | 3.23E-31    | 3.40E-30    |
| ACR        | 0.121711299 | 0.307961216 | 1.33928556   | 1.58E-14    | 4.02E-14    |
| AC087289.2 | 0.107232841 | 0.292999522 | 1.450151496  | 5.98E-15    | 1.56E-14    |
| TNFSF14    | 0.114871977 | 1.55979764  | 3.763260072  | 4.76E-34    | 8.30E-33    |
| KIF18A     | 0.205855315 | 0.601444387 | 1.546800644  | 1.07E-29    | 9.21E-29    |
| AC005776.1 | 0.035039633 | 0.333274108 | 3.249649648  | 2.13E-14    | 5.36E-14    |
| PRKX       | 11.59000861 | 5.77867531  | -1.004070923 | 3.31E-11    | 6.83E-11    |
| AIM2       | 0.159185024 | 1.32448773  | 3.056657959  | 3.08E-28    | 2.25E-27    |

Table S1. The differentially expressed genes(DEGs) were screened out in TCGA

| ID         | conMean     | treatMean   | logFC        | pValue      | FDR         |
|------------|-------------|-------------|--------------|-------------|-------------|
| AC138230.1 | 0.183758259 | 0.484032719 | 1.397295477  | 1.32E-08    | 2.33E-08    |
| AC010247.2 | 0.075203435 | 0.244391859 | 1.700325756  | 2.77E-24    | 1.42E-23    |
| ACRBP      | 0.662511444 | 1.625963537 | 1.295277623  | 1.53E-23    | 7.41E-23    |
| AC131009.3 | 0.472820813 | 1.231992601 | 1.381628145  | 1.60E-20    | 6.12E-20    |
| LINC00115  | 0.300086003 | 0.742111658 | 1.30626024   | 3.84E-10    | 7.42E-10    |
| AC097534.2 | 0.493840268 | 3.709262762 | 2.909016086  | 3.21E-35    | 7.37E-34    |
| JMY        | 4.9709135   | 2.202805873 | -1.174168639 | 5.87E-34    | 1.01E-32    |
| SCGB3A1    | 0.2821962   | 0.891585871 | 1.659675191  | 2.78E-13    | 6.54E-13    |
| TTC21B-AS1 | 0.037142902 | 13.27978033 | 8.481929016  | 1.68E-36    | 5.56E-35    |
| AC073316.2 | 0.262737228 | 0.875169623 | 1.735942032  | 5.57E-10    | 1.07E-09    |
| LGALS17A   | 0.016765179 | 0.509799721 | 4.926390772  | 3.59E-26    | 2.17E-25    |
| ANLN       | 0.522617155 | 2.123145237 | 2.022376677  | 1.69E-30    | 1.61E-29    |
| FAM83F     | 1.09597734  | 0.52126547  | -1.07212777  | 3.50E-20    | 1.30E-19    |
| OACYLP     | 0.023599548 | 2.564611281 | 6.763837138  | 9.12E-39    | 6.93E-37    |
| LAG3       | 0.321975235 | 3.78157404  | 3.553965234  | 5.32E-29    | 4.22E-28    |
| RDM1P3     | 0.071581151 | 0.245077208 | 1.775584666  | 5.94E-11    | 1.21E-10    |
| AC124319.1 | 0.111509303 | 0.428196457 | 1.941108789  | 4.64E-08    | 7.90E-08    |
| NXP2       | 2.683930411 | 0.205499622 | -3.707139619 | 7.63E-47    | 6.05E-44    |
| CADM4      | 17.45104154 | 5.452549978 | -1.67831015  | 1.98E-29    | 1.65E-28    |
| RNA5SP527  | 0.104913051 | 0.331680217 | 1.660598808  | 3.02E-07    | 4.88E-07    |
| RBM11      | 1.038053208 | 0.176092954 | -2.559471306 | 1.25E-35    | 3.20E-34    |
| AC016596.1 | 3.820450167 | 8.531426684 | 1.159044377  | 4.32E-16    | 1.22E-15    |
| HM13-IT1   | 0.27159886  | 1.359948026 | 2.324002186  | 6.03E-26    | 3.57E-25    |
| GLYATL1    | 28.64842948 | 11.43953843 | -1.32442721  | 2.71E-05    | 3.87E-05    |
| AC090181.2 | 0.20037267  | 0.50301025  | 1.327902053  | 3.91E-09    | 7.12E-09    |
| AC009119.2 | 0.156303631 | 0.438230686 | 1.487339219  | 2.23E-16    | 6.41E-16    |
| SLCO1C1    | 0.070529577 | 0.406953682 | 2.528564315  | 7.02E-30    | 6.15E-29    |
| RNU6-353P  | 0.087261901 | 0.337702651 | 1.952329701  | 0.014604355 | 0.017181397 |
| SMIM32     | 14.89402588 | 6.309669622 | -1.239097398 | 1.27E-09    | 2.39E-09    |
| ANKRD37    | 1.911317899 | 4.828163202 | 1.336906689  | 1.56E-27    | 1.06E-26    |
| MAMDC4     | 0.855645818 | 2.995246688 | 1.807589185  | 3.06E-17    | 9.31E-17    |
| FUT11      | 4.624923431 | 13.74948659 | 1.571876363  | 1.52E-34    | 2.95E-33    |
| ACAD8      | 7.28976025  | 3.498253484 | -1.059236536 | 3.27E-36    | 9.74E-35    |
| IGHV2-70D  | 0.404168767 | 3.132870012 | 2.954455167  | 1.67E-07    | 2.75E-07    |
| AC103563.3 | 0.077983211 | 0.331891647 | 2.089476858  | 0.021986862 | 0.025540068 |
| IL4R       | 4.881285833 | 13.64068417 | 1.482582868  | 6.75E-35    | 1.44E-33    |
| NCMAP      | 1.250661357 | 0.313875857 | -1.994425235 | 9.12E-27    | 5.78E-26    |
| FPR2       | 0.163058047 | 0.412641538 | 1.339503416  | 1.95E-11    | 4.09E-11    |
| AL161669.1 | 0.218977187 | 1.05455292  | 2.267779015  | 1.76E-17    | 5.42E-17    |
| AL122020.1 | 0.525168843 | 1.118981651 | 1.091333146  | 7.52E-13    | 1.72E-12    |
| AC002091.1 | 0.2307892   | 0.802366979 | 1.79768652   | 4.34E-25    | 2.38E-24    |
| SYTL3      | 2.178595792 | 5.022064227 | 1.20488193   | 1.37E-21    | 5.68E-21    |
| GPC5-AS1   | 0.413017039 | 0.205997779 | -1.003572519 | 6.51E-35    | 1.39E-33    |
| FRG2C      | 2.011799035 | 0.098879493 | -4.346671036 | 7.72E-29    | 6.01E-28    |
| ATP6V0D2   | 42.30824335 | 14.59175086 | -1.535785783 | 1.79E-35    | 4.39E-34    |
| LYZ        | 20.62648308 | 114.1078376 | 2.467828128  | 1.72E-24    | 8.96E-24    |
| HAS2       | 0.835206191 | 0.406326596 | -1.039492608 | 3.41E-09    | 6.23E-09    |
| PHBP9      | 0.259996196 | 0.674951232 | 1.37629275   | 4.46E-13    | 1.04E-12    |
| BLM        | 0.177353708 | 0.422022941 | 1.250691934  | 5.55E-26    | 3.29E-25    |
| SAA2-SAA4  | 0.092875216 | 3.962203899 | 5.414865661  | 0.028172342 | 0.032417403 |
| SDS        | 0.257938154 | 5.425802914 | 4.394739548  | 1.86E-39    | 1.99E-37    |
| NRXN2      | 1.134871013 | 3.371971907 | 1.571064184  | 6.61E-13    | 1.52E-12    |
| VEGFC      | 3.189453496 | 6.994936381 | 1.133001693  | 1.55E-17    | 4.81E-17    |
| RTN4RL2    | 0.993085525 | 2.01762223  | 1.022666202  | 6.55E-08    | 1.10E-07    |
| HSPE1P11   | 0.052828104 | 0.289619386 | 2.454780633  | 0.001462352 | 0.001859714 |

Table S1. The differentially expressed genes(DEGs) were screened out in TCGA

| ID         | conMean     | treatMean   | logFC        | pValue      | FDR         |
|------------|-------------|-------------|--------------|-------------|-------------|
| AC092032.1 | 0.132134298 | 0.399114618 | 1.594798125  | 2.13E-12    | 4.74E-12    |
| P2RY2      | 1.143417576 | 0.419736465 | -1.445796664 | 2.43E-23    | 1.16E-22    |
| IGKV3-20   | 36.32660977 | 160.4613739 | 2.14312742   | 3.99E-05    | 5.62E-05    |
| PADI3      | 0.125578809 | 1.037830567 | 3.046905992  | 1.82E-17    | 5.62E-17    |
| PPP1R35    | 5.031191444 | 10.11860369 | 1.008038228  | 3.05E-22    | 1.33E-21    |
| AC116366.1 | 0.244980328 | 1.022029135 | 2.060698511  | 7.87E-25    | 4.23E-24    |
| RPS28P7    | 145.406802  | 300.7078053 | 1.048267557  | 1.18E-09    | 2.22E-09    |
| GJA1       | 17.40098624 | 60.51947384 | 1.798230369  | 2.30E-25    | 1.29E-24    |
| AC008731.1 | 0.129552914 | 0.424071741 | 1.710766881  | 2.96E-10    | 5.76E-10    |
| PBK        | 0.378974348 | 1.304672361 | 1.78351545   | 2.33E-30    | 2.17E-29    |
| HTR7       | 0.115943217 | 0.400627176 | 1.788841871  | 5.48E-20    | 2.02E-19    |
| RPL13AP25  | 2.367730482 | 6.275784185 | 1.406290872  | 7.66E-15    | 1.99E-14    |
| LILRB3     | 0.191575925 | 1.056059909 | 2.462703506  | 3.19E-35    | 7.31E-34    |
| IGHJ2      | 0.929418008 | 5.149062181 | 2.469910189  | 0.000138464 | 0.000188725 |
| TRDV1      | 0.137387798 | 0.746249974 | 2.441405095  | 6.49E-20    | 2.38E-19    |
| AC002059.1 | 0.089059067 | 0.529891689 | 2.572863097  | 2.61E-20    | 9.82E-20    |
| SEMA3A     | 0.189572838 | 0.41963461  | 1.146381405  | 0.002418253 | 0.003021606 |
| LILRB1     | 0.386682366 | 2.985894924 | 2.948942517  | 3.59E-39    | 3.28E-37    |
| SH3GL1     | 12.44718822 | 25.71262339 | 1.046656933  | 3.72E-32    | 4.51E-31    |
| HNRNPA1P4  | 0.090898561 | 0.295004595 | 1.698408068  | 1.44E-12    | 3.23E-12    |
| NPDC1      | 7.526885069 | 19.71118544 | 1.388889696  | 5.59E-24    | 2.80E-23    |
| AL008582.1 | 0.135247671 | 0.577301808 | 2.093721998  | 2.57E-16    | 7.33E-16    |
| RNU4-82P   | 0.078375234 | 0.279491529 | 1.834334814  | 1.38E-08    | 2.43E-08    |
| MIR579     | 0.11871469  | 0.376530248 | 1.665267296  | 1.81E-05    | 2.62E-05    |
| AC087442.1 | 0.049063755 | 0.230458299 | 2.23177617   | 2.46E-07    | 4.01E-07    |
| AC010422.4 | 0.154836327 | 0.354913864 | 1.196724942  | 0.000481215 | 0.000631921 |
| RBM47      | 32.41202653 | 15.25272568 | -1.08746215  | 9.42E-36    | 2.50E-34    |
| SPARC      | 157.9616897 | 569.4551487 | 1.850007512  | 2.04E-32    | 2.61E-31    |
| AL359397.1 | 1.086088829 | 0.342991112 | -1.662899008 | 5.40E-22    | 2.31E-21    |
| SNORC      | 0.209656909 | 0.686175812 | 1.710547899  | 1.34E-14    | 3.42E-14    |
| AL157931.1 | 1.605201349 | 9.353443464 | 2.542743317  | 7.63E-08    | 1.28E-07    |
| DAO        | 12.55426448 | 1.382285341 | -3.183050145 | 1.16E-11    | 2.47E-11    |
| SBNO2      | 5.164889278 | 10.42104984 | 1.012691298  | 3.89E-24    | 1.97E-23    |
| AC129507.4 | 1.895806248 | 0.539725507 | -1.812513752 | 2.09E-24    | 1.08E-23    |
| SPTBN5     | 0.185392419 | 0.464092879 | 1.323831312  | 0.000313154 | 0.000416675 |
| AC119751.6 | 0.015862134 | 0.325389335 | 4.358508181  | 8.34E-17    | 2.46E-16    |
| CD52       | 6.109696011 | 26.21698756 | 2.101329418  | 1.57E-28    | 1.19E-27    |
| CELF4      | 0.117240508 | 0.24832717  | 1.082770996  | 0.008782524 | 0.010525328 |
| AC016700.2 | 0.261544812 | 0.640643061 | 1.292462622  | 3.48E-10    | 6.75E-10    |
| AL513320.1 | 0.326674521 | 0.944454675 | 1.531627628  | 4.18E-06    | 6.30E-06    |
| DIAPH2     | 2.3341645   | 5.17513028  | 1.148688943  | 5.14E-28    | 3.66E-27    |
| KRT20      | 0.044700591 | 0.819207406 | 4.195862944  | 0.016586126 | 0.019425175 |
| SNORA53    | 0.312724092 | 28.53008392 | 6.511449814  | 2.55E-09    | 4.70E-09    |
| RAPGEF4    | 1.796226444 | 3.679776594 | 1.034648943  | 2.66E-13    | 6.28E-13    |
| CTF1       | 7.684911203 | 3.378299894 | -1.185731187 | 1.26E-26    | 7.89E-26    |
| WNT4       | 0.811476534 | 0.215655529 | -1.911820673 | 1.74E-19    | 6.19E-19    |
| AC005165.2 | 0.130204789 | 0.43972502  | 1.755819108  | 1.70E-10    | 3.36E-10    |
| CRACR2B    | 1.761232851 | 3.942594574 | 1.162559703  | 2.93E-13    | 6.88E-13    |
| AC106782.6 | 0.595328908 | 1.199866023 | 1.011114468  | 3.18E-17    | 9.65E-17    |
| SULT2A1    | 0.018168638 | 0.369390249 | 4.345623584  | 0.001983486 | 0.002494564 |
| AC004253.1 | 0.148081443 | 0.831291728 | 2.488963995  | 5.64E-22    | 2.41E-21    |
| AC005837.3 | 0.045822233 | 0.319215692 | 2.800411898  | 1.59E-10    | 3.16E-10    |
| IFI30      | 0.192021464 | 0.970552    | 2.337537931  | 3.39E-26    | 2.05E-25    |
| HSPA6      | 0.654532543 | 2.747032921 | 2.069337371  | 2.90E-31    | 3.06E-30    |
| AC011676.1 | 0.786472168 | 0.256174366 | -1.618269591 | 7.19E-12    | 1.55E-11    |

Table S1. The differentially expressed genes(DEGs) were screened out in TCGA

| ID         | conMean     | treatMean   | logFC        | pValue      | FDR         |
|------------|-------------|-------------|--------------|-------------|-------------|
| AQP6       | 17.70035548 | 7.611376706 | -1.217549005 | 1.77E-38    | 1.22E-36    |
| HLA-DOB    | 0.636122774 | 2.937564404 | 2.20724334   | 2.20E-20    | 8.32E-20    |
| TREML1     | 0.059384478 | 0.469524638 | 2.983043061  | 1.73E-34    | 3.32E-33    |
| PLAT       | 26.08385588 | 7.754012856 | -1.750142121 | 2.32E-35    | 5.49E-34    |
| MIR5685    | 0.161398326 | 0.487502799 | 1.594784882  | 3.45E-08    | 5.92E-08    |
| AC074286.1 | 0.131842682 | 0.49110517  | 1.897214516  | 1.14E-18    | 3.80E-18    |
| CNP        | 27.86898042 | 11.13392783 | -1.323697586 | 9.30E-34    | 1.54E-32    |
| RN7SL130P  | 0.269914912 | 0.844187494 | 1.645058776  | 3.21E-13    | 7.52E-13    |
| MKI67      | 0.406896226 | 1.886047409 | 2.212633135  | 1.31E-31    | 1.46E-30    |
| IGHV3-60   | 0.095580371 | 0.262736471 | 1.458830214  | 0.026524125 | 0.030590929 |
| AC005740.4 | 0.253465327 | 0.566824288 | 1.161113172  | 2.64E-16    | 7.52E-16    |
| AL031726.1 | 2.981812449 | 0.069165083 | -5.430001803 | 4.13E-39    | 3.64E-37    |
| CCL18      | 0.240432572 | 12.12416365 | 5.656109063  | 1.08E-30    | 1.06E-29    |
| TRPM6      | 1.109150587 | 0.148155525 | -2.904270921 | 4.77E-18    | 1.53E-17    |
| RNU6-611P  | 0.175350911 | 1.024266305 | 2.546274027  | 1.15E-11    | 2.45E-11    |
| MIR647     | 1.437939718 | 6.738405274 | 2.228404005  | 5.30E-16    | 1.48E-15    |
| LINC00323  | 1.036565602 | 0.425140913 | -1.285798416 | 5.19E-21    | 2.06E-20    |
| PTPN4      | 4.347065708 | 1.858788437 | -1.225679328 | 9.95E-37    | 3.63E-35    |
| AC092078.2 | 2.525482063 | 0.022051541 | -6.839535523 | 1.07E-49    | 1.30E-46    |
| PC         | 13.14827386 | 5.074872195 | -1.373430016 | 6.36E-15    | 1.66E-14    |
| SOD2       | 39.52757972 | 90.10933722 | 1.188816986  | 4.61E-15    | 1.21E-14    |
| RNU6-720P  | 0.256413729 | 0.609728592 | 1.24969369   | 0.00026551  | 0.00035514  |
| PDE1A      | 25.68797689 | 3.46947926  | -2.888302225 | 2.89E-39    | 2.80E-37    |
| PABPC1P4   | 1.284807288 | 0.528633357 | -1.281212614 | 1.50E-27    | 1.02E-26    |
| MIR421     | 0.234096458 | 0.698461685 | 1.577077869  | 3.87E-05    | 5.46E-05    |
| PTPRD      | 5.150893151 | 2.418181667 | -1.090899981 | 8.07E-08    | 1.35E-07    |
| GOT1       | 84.95069431 | 40.84269312 | -1.05654774  | 4.68E-28    | 3.34E-27    |
| TRGV2      | 0.052945686 | 0.356171188 | 2.749985772  | 4.09E-25    | 2.25E-24    |
| SCTR       | 4.773160885 | 1.749431184 | -1.448059049 | 4.01E-14    | 9.93E-14    |
| LDHA       | 90.01795639 | 283.8685387 | 1.656938245  | 7.71E-35    | 1.60E-33    |
| AC103563.2 | 1.603528419 | 0.289782957 | -2.46820527  | 2.54E-32    | 3.21E-31    |
| TSGA10     | 1.089284418 | 0.530246345 | -1.038646023 | 4.72E-28    | 3.37E-27    |
| AL161747.1 | 0.072011156 | 0.301232841 | 2.064586738  | 1.05E-11    | 2.23E-11    |
| AC010970.1 | 0.246680712 | 1.426183786 | 2.531443088  | 0.001762441 | 0.002225126 |
| CAV2       | 6.180266861 | 24.30287911 | 1.975386197  | 3.44E-38    | 2.17E-36    |
| AC007000.1 | 0.246233351 | 0.509847701 | 1.050040178  | 4.58E-11    | 9.37E-11    |
| BDNF-AS    | 1.609535926 | 0.794672428 | -1.018212585 | 1.92E-32    | 2.48E-31    |
| AC134879.2 | 0.127182235 | 0.425727897 | 1.743034461  | 0.004687972 | 0.005731012 |
| MYCN       | 1.312991738 | 0.371646926 | -1.820853259 | 2.79E-21    | 1.13E-20    |
| CAPN5      | 10.17730922 | 4.869008717 | -1.063656189 | 1.02E-32    | 1.39E-31    |
| PAG1       | 1.443285083 | 4.876323406 | 1.756437516  | 6.18E-34    | 1.06E-32    |
| HIST4H4    | 0.419419956 | 0.865022876 | 1.044342781  | 1.74E-07    | 2.85E-07    |
| AC063976.2 | 0.038549317 | 0.265454173 | 2.783685615  | 1.39E-26    | 8.68E-26    |
| GAL3ST1    | 6.995447208 | 53.04403877 | 2.922702432  | 2.39E-30    | 2.23E-29    |
| CXCL5      | 0.211824868 | 5.253037935 | 4.632208128  | 1.39E-10    | 2.77E-10    |
| AC016747.2 | 0.095317946 | 0.252480525 | 1.405352345  | 7.22E-08    | 1.22E-07    |
| AC099850.3 | 0.640911625 | 2.18794834  | 1.771381333  | 3.39E-24    | 1.72E-23    |
| FCAMR      | 9.941867563 | 3.608018646 | -1.462310091 | 3.72E-05    | 5.25E-05    |
| ALDH1L1    | 15.76332322 | 7.277239312 | -1.115108555 | 3.33E-10    | 6.46E-10    |
| WFIKKN1    | 0.320360779 | 0.771844669 | 1.268613005  | 1.40E-05    | 2.04E-05    |
| AC016026.1 | 0.033276527 | 0.238546728 | 2.841695119  | 1.33E-29    | 1.14E-28    |
| LPCAT1     | 7.316948347 | 42.07852589 | 2.523770185  | 3.13E-36    | 9.37E-35    |
| HJURP      | 0.175017236 | 1.042089992 | 2.573910959  | 4.14E-34    | 7.36E-33    |
| SYNM       | 2.819065014 | 5.995743799 | 1.088721988  | 7.26E-25    | 3.91E-24    |
| AC008760.1 | 0.424249434 | 0.86778965  | 1.032432644  | 7.19E-07    | 1.14E-06    |

Table S1. The differentially expressed genes(DEGs) were screened out in TCGA

| ID          | conMean     | treatMean   | logFC        | pValue      | FDR         |
|-------------|-------------|-------------|--------------|-------------|-------------|
| AC120498.3  | 0.066387444 | 0.352439608 | 2.408393747  | 2.15E-05    | 3.09E-05    |
| IRX1        | 9.419194583 | 0.396656897 | -4.569640162 | 9.65E-41    | 2.16E-38    |
| LINC02541   | 0.043188738 | 0.267704167 | 2.631912537  | 7.20E-21    | 2.82E-20    |
| SIGLEC16    | 0.14958101  | 0.368353138 | 1.300162501  | 4.12E-11    | 8.46E-11    |
| CTH         | 5.554299703 | 1.53365613  | -1.856629981 | 1.54E-37    | 7.56E-36    |
| ZNF683      | 0.115487873 | 1.209809755 | 3.388966927  | 3.29E-33    | 4.87E-32    |
| TRAM1L1     | 7.006953542 | 2.464245189 | -1.507641521 | 8.06E-29    | 6.27E-28    |
| IGKV3OR2-2  | 0.142940505 | 1.554909878 | 3.443344267  | 0.00010245  | 0.000140748 |
| AC136475.5  | 0.110998273 | 0.242860053 | 1.129587978  | 1.77E-09    | 3.30E-09    |
| SNORD104    | 1.413838704 | 8.331461407 | 2.558952037  | 7.17E-22    | 3.04E-21    |
| AP003469.4  | 0.907437374 | 2.184245148 | 1.267264801  | 1.58E-24    | 8.29E-24    |
| AC024361.3  | 0.045829807 | 0.356237808 | 2.958482514  | 5.51E-20    | 2.03E-19    |
| HOXB9       | 24.15763419 | 2.374513435 | -3.346775351 | 5.57E-37    | 2.24E-35    |
| CIDEC       | 0.326088786 | 0.88057837  | 1.43318658   | 0.002331261 | 0.002915917 |
| MIDIIP1-AS1 | 2.164669724 | 0.828685085 | -1.385251061 | 1.48E-30    | 1.42E-29    |
| ALKAL2      | 2.460337583 | 8.03056499  | 1.706645211  | 9.98E-10    | 1.88E-09    |
| RN7SL67P    | 0.042388856 | 0.426426292 | 3.330539458  | 1.23E-14    | 3.14E-14    |
| C5orf46     | 0.444219216 | 13.49408672 | 4.924911725  | 4.00E-37    | 1.69E-35    |
| RPL31P52    | 0.073388158 | 0.3043666   | 2.052190851  | 1.82E-14    | 4.61E-14    |
| AL136126.1  | 0.114406201 | 0.272992199 | 1.25469447   | 8.42E-13    | 1.92E-12    |
| AL139287.1  | 2.075306869 | 5.486949279 | 1.40267956   | 2.36E-14    | 5.92E-14    |
| AC009120.2  | 0.521049923 | 1.716232632 | 1.719751609  | 1.15E-17    | 3.59E-17    |
| CORO2B      | 5.227825319 | 1.304071421 | -2.003188051 | 1.97E-37    | 9.30E-36    |
| AC002470.1  | 1.412147882 | 0.585148571 | -1.271016297 | 9.77E-26    | 5.67E-25    |
| AL391832.2  | 0.108319647 | 0.218769577 | 1.014117188  | 1.09E-13    | 2.64E-13    |
| CCL22       | 0.319994012 | 0.673709132 | 1.074080948  | 5.63E-12    | 1.22E-11    |
| SH2D1A      | 0.376502135 | 2.149816285 | 2.513483427  | 9.19E-27    | 5.82E-26    |
| VXN         | 0.32265325  | 1.042066362 | 1.691390692  | 4.93E-13    | 1.14E-12    |
| HYAL1       | 24.93277394 | 11.76320343 | -1.083762405 | 3.70E-31    | 3.83E-30    |
| MIR378B     | 0.013860365 | 0.435407652 | 4.97332958   | 8.16E-16    | 2.26E-15    |
| RPL10P13    | 0.152357853 | 0.544312865 | 1.836972276  | 5.55E-09    | 1.00E-08    |
| EDAR        | 0.548990449 | 0.253459016 | -1.115028566 | 4.27E-19    | 1.47E-18    |
| SIRPB2      | 0.30079028  | 1.351912262 | 2.168171671  | 3.46E-31    | 3.61E-30    |
| ARHGEF26    | 1.418960936 | 0.554307684 | -1.35607596  | 1.19E-19    | 4.29E-19    |
| HCK         | 2.050127786 | 8.59168049  | 2.067226506  | 3.51E-33    | 5.17E-32    |
| AL163051.1  | 0.564558999 | 0.244077215 | -1.209786732 | 4.06E-24    | 2.05E-23    |
| ALPI        | 0.763874302 | 5.040047415 | 2.722030143  | 0.024883035 | 0.028780445 |
| AC239803.3  | 0.069057336 | 0.306794199 | 2.151404628  | 1.14E-16    | 3.34E-16    |
| AC087289.5  | 0.111147604 | 0.296692251 | 1.416490403  | 8.88E-18    | 2.79E-17    |
| AC136632.1  | 1.624702597 | 5.77391277  | 1.829373656  | 1.63E-22    | 7.24E-22    |
| PPM1J       | 0.693380361 | 0.299887959 | -1.209223377 | 1.49E-26    | 9.28E-26    |
| APIG2       | 1.875617753 | 4.217318889 | 1.168960275  | 3.62E-16    | 1.03E-15    |
| GGACT       | 11.30962573 | 2.332852925 | -2.277383927 | 9.19E-25    | 4.91E-24    |
| AC016747.3  | 0.119158707 | 0.378848627 | 1.668737151  | 6.32E-13    | 1.45E-12    |
| AIF1        | 14.58156717 | 30.7601602  | 1.076917234  | 7.27E-16    | 2.02E-15    |
| IGLV1-44    | 11.27860858 | 48.7341877  | 2.111345102  | 2.07E-06    | 3.17E-06    |
| GALM        | 40.66423201 | 18.38678727 | -1.145090948 | 7.58E-22    | 3.21E-21    |
| CHST15      | 5.040470694 | 16.10054749 | 1.675479379  | 3.49E-23    | 1.63E-22    |
| AC022558.3  | 0.118206197 | 0.383756613 | 1.698885936  | 3.16E-16    | 8.98E-16    |
| AC012676.5  | 0.246254406 | 0.869672326 | 1.820322391  | 9.92E-18    | 3.11E-17    |
| AC069234.5  | 0.253576775 | 0.695522762 | 1.455675115  | 2.66E-25    | 1.49E-24    |
| CYP51A1     | 1.791744011 | 0.812039224 | -1.141743211 | 1.68E-30    | 1.60E-29    |
| MIR3176     | 0.405845286 | 1.697479296 | 2.064392217  | 1.79E-12    | 4.00E-12    |
| AL391987.4  | 0.369217546 | 0.177452033 | -1.057042012 | 7.58E-17    | 2.24E-16    |
| LMNB1       | 1.941582879 | 4.905947053 | 1.337298372  | 2.43E-26    | 1.49E-25    |

Table S1. The differentially expressed genes(DEGs) were screened out in TCGA

| ID         | conMean     | treatMean   | logFC        | pValue      | FDR         |
|------------|-------------|-------------|--------------|-------------|-------------|
| FAM163A    | 0.060743942 | 0.571592853 | 3.234175437  | 7.82E-34    | 1.31E-32    |
| AL353803.5 | 0.148096053 | 0.504178583 | 1.767401641  | 3.02E-09    | 5.54E-09    |
| BX293535.1 | 0.142735605 | 0.326458769 | 1.193555541  | 3.56E-06    | 5.39E-06    |
| CD80       | 0.0603403   | 0.340053775 | 2.494569123  | 1.89E-29    | 1.58E-28    |
| CDK18      | 9.204546861 | 48.65050373 | 2.402036138  | 3.75E-32    | 4.55E-31    |
| SYCE2      | 0.225065085 | 0.477981679 | 1.086613053  | 6.83E-12    | 1.47E-11    |
| AL391845.2 | 0.016768096 | 0.590421715 | 5.137955007  | 1.03E-40    | 2.25E-38    |
| IGHV3-72   | 1.79127637  | 5.567548948 | 1.636054394  | 0.00260664  | 0.003247927 |
| BNIP3P1    | 0.110459855 | 0.321717745 | 1.542273375  | 6.74E-22    | 2.86E-21    |
| TJP3       | 4.784781764 | 0.648501051 | -2.883272307 | 6.62E-37    | 2.57E-35    |
| STK32A     | 1.491644093 | 0.562583191 | -1.406764996 | 6.77E-28    | 4.75E-27    |
| TCAIM      | 6.850039833 | 3.306462686 | -1.050823757 | 2.24E-36    | 7.09E-35    |
| HLA-F      | 6.785350208 | 37.5298872  | 2.46754477   | 6.29E-40    | 8.58E-38    |
| LINC02273  | 0.08570194  | 0.279799367 | 1.70699293   | 5.22E-15    | 1.37E-14    |
| GAREM2     | 0.719129524 | 1.697322318 | 1.23893701   | 3.52E-20    | 1.31E-19    |
| CD1A       | 0.039832605 | 0.278854276 | 2.807489666  | 3.80E-14    | 9.43E-14    |
| CHSY3      | 0.327480898 | 1.513704245 | 2.20860069   | 2.65E-32    | 3.32E-31    |
| NFE4       | 0.027847185 | 0.483342128 | 4.117441358  | 9.97E-13    | 2.27E-12    |
| LINC01762  | 3.893641994 | 0.161101776 | -4.595075936 | 4.96E-40    | 7.29E-38    |
| AC093915.1 | 0.040442217 | 0.512529181 | 3.663700165  | 3.90E-20    | 1.45E-19    |
| HIST1H2BE  | 0.258368618 | 0.98281541  | 1.927489634  | 1.34E-06    | 2.08E-06    |
| EDA2R      | 1.111160688 | 5.478233544 | 2.301643308  | 3.41E-37    | 1.48E-35    |
| IGKV1D-27  | 0.109540928 | 0.426100141 | 1.959722528  | 0.004699614 | 0.005744561 |
| C5orf56    | 0.570751476 | 1.44442429  | 1.339559995  | 4.01E-26    | 2.41E-25    |
| SLC4A9     | 5.238483251 | 0.541384469 | -3.274423749 | 3.61E-37    | 1.56E-35    |
| PCDHB2     | 0.565923194 | 1.252837783 | 1.146521455  | 0.006002573 | 0.007281033 |
| HYKK       | 1.821707118 | 0.461538218 | -1.980769009 | 6.66E-40    | 8.96E-38    |
| COBL       | 4.386521764 | 1.912183399 | -1.197856526 | 3.29E-29    | 2.68E-28    |
| S100A8     | 3.659235781 | 10.48543314 | 1.518772175  | 2.03E-15    | 5.48E-15    |
| CAPN6      | 14.07829831 | 5.494610519 | -1.357383836 | 1.24E-15    | 3.39E-15    |
| MIR320B2   | 0.072832029 | 0.266543467 | 1.871725886  | 1.18E-08    | 2.08E-08    |
| AL359314.1 | 0.016203699 | 0.339825844 | 4.390400501  | 4.42E-16    | 1.24E-15    |
| AC084824.5 | 0.602468371 | 1.483501864 | 1.300049332  | 8.09E-18    | 2.55E-17    |
| ADHFE1     | 4.49728644  | 2.038163023 | -1.141785325 | 1.04E-24    | 5.55E-24    |
| RN7SL15P   | 0.05752235  | 0.274193797 | 2.253001421  | 1.59E-07    | 2.62E-07    |
| BGLAP      | 0.12450433  | 0.631912616 | 2.343529155  | 8.76E-21    | 3.42E-20    |
| NDRG2      | 33.77022325 | 13.21895484 | -1.353143602 | 7.42E-32    | 8.58E-31    |
| LINC01625  | 0.745975386 | 0.273594968 | -1.44708633  | 8.17E-23    | 3.72E-22    |
| CDC4A8     | 0.663871956 | 1.820878278 | 1.455657571  | 5.14E-28    | 3.66E-27    |
| AC245052.4 | 0.090430671 | 0.261874188 | 1.533989788  | 4.43E-15    | 1.17E-14    |
| AC109460.1 | 0.127675322 | 0.339055241 | 1.409040651  | 1.39E-11    | 2.95E-11    |
| AL133371.2 | 0.693636516 | 1.822381365 | 1.393573145  | 1.24E-17    | 3.85E-17    |
| SLC51B     | 8.016260278 | 2.836177256 | -1.49898165  | 8.25E-06    | 1.22E-05    |
| MICE       | 0.150387182 | 0.87214647  | 2.535888843  | 2.27E-35    | 5.43E-34    |
| AL136531.2 | 0.108910552 | 0.258924219 | 1.249386172  | 1.34E-13    | 3.21E-13    |
| AL096865.1 | 0.068664485 | 0.399413322 | 2.540246448  | 4.09E-21    | 1.64E-20    |
| IGHV4-31   | 2.635738927 | 15.81837258 | 2.585321798  | 6.65E-05    | 9.25E-05    |
| MET        | 20.76852771 | 46.29848048 | 1.156565898  | 1.96E-24    | 1.02E-23    |
| AC083862.2 | 0.826666775 | 3.469092316 | 2.069180424  | 8.32E-38    | 4.52E-36    |
| ZMYND15    | 0.558497018 | 1.872433833 | 1.745293256  | 2.43E-33    | 3.67E-32    |
| ATAD5      | 0.251822376 | 0.629828104 | 1.322551655  | 1.60E-26    | 9.90E-26    |
| CD2        | 1.81832654  | 15.03387378 | 3.047533585  | 1.83E-32    | 2.37E-31    |
| AL034397.3 | 0.246558054 | 0.945240897 | 1.938754671  | 2.37E-21    | 9.66E-21    |
| PAQR5      | 24.64039447 | 7.270684679 | -1.760862219 | 1.39E-38    | 9.98E-37    |
| KNTC1      | 0.706844743 | 1.632347947 | 1.207483341  | 2.19E-28    | 1.63E-27    |



Table S1. The differentially expressed genes(DEGs) were screened out in TCGA

| ID           | conMean     | treatMean   | logFC        | pValue      | FDR         |
|--------------|-------------|-------------|--------------|-------------|-------------|
| IGKV2D-24    | 0.15442559  | 0.568533003 | 1.88033226   | 0.000181221 | 0.000245071 |
| FCF1P7       | 0.052581146 | 0.27893082  | 2.407289875  | 7.24E-09    | 1.30E-08    |
| DTX2         | 1.158550882 | 2.844438565 | 1.295822515  | 4.09E-37    | 1.72E-35    |
| CD101        | 0.237885686 | 0.65811769  | 1.468077139  | 8.63E-24    | 4.24E-23    |
| KIFC1        | 0.467072225 | 1.813281674 | 1.956885488  | 3.63E-33    | 5.34E-32    |
| HOTAIR       | 0.163085144 | 0.389775864 | 1.257019386  | 7.44E-12    | 1.60E-11    |
| RPL36AP43    | 0.239485396 | 0.856996862 | 1.839352237  | 5.97E-18    | 1.90E-17    |
| AC016405.3   | 0.288723805 | 1.655008079 | 2.519076294  | 2.74E-23    | 1.29E-22    |
| SHISA6       | 0.834881871 | 0.265613266 | -1.652244879 | 7.41E-24    | 3.66E-23    |
| AC004771.5   | 0.166579987 | 0.343103246 | 1.042427693  | 7.45E-09    | 1.33E-08    |
| CRYGS        | 0.298278892 | 1.537256569 | 2.365624178  | 1.01E-25    | 5.88E-25    |
| L3MBTL4-AS0  | 0.056628053 | 0.412246474 | 2.863918322  | 6.77E-38    | 3.81E-36    |
| C6orf141     | 0.113380179 | 0.48558174  | 2.098545716  | 1.36E-05    | 1.99E-05    |
| AC004908.1   | 0.538013468 | 1.27094802  | 1.240190835  | 2.92E-10    | 5.68E-10    |
| CA2          | 150.9875032 | 57.10456339 | -1.402751201 | 1.75E-32    | 2.27E-31    |
| AL359182.1   | 0.148687713 | 0.472457208 | 1.667898235  | 1.18E-16    | 3.44E-16    |
| AL596220.1   | 0.109025317 | 0.249927141 | 1.196844403  | 1.38E-08    | 2.43E-08    |
| CTD-3080P120 | 0.535036427 | 0.251778657 | -1.087481124 | 0.000574411 | 0.000750379 |
| GUSBP2       | 0.137838934 | 0.424303461 | 1.622112997  | 1.21E-20    | 4.66E-20    |
| HIGD1A       | 56.28117056 | 22.25637019 | -1.338434013 | 1.69E-31    | 1.84E-30    |
| AC048382.2   | 0.179138951 | 0.644482009 | 1.847061019  | 2.58E-15    | 6.91E-15    |
| TRAV13-1     | 0.276330233 | 1.49609232  | 2.436733886  | 3.73E-19    | 1.29E-18    |
| LMO3         | 1.48910374  | 0.14533913  | -3.356949184 | 8.48E-38    | 4.58E-36    |
| ACE          | 2.372841294 | 5.402977995 | 1.187139196  | 1.18E-15    | 3.24E-15    |
| RPS26P28     | 0.097339975 | 0.238914634 | 1.295390917  | 0.001273762 | 0.001626712 |
| AC004034.1   | 0.060675346 | 0.286162741 | 2.237653508  | 5.28E-18    | 1.69E-17    |
| AC010530.1   | 0.078999766 | 0.286894834 | 1.860601703  | 1.46E-14    | 3.71E-14    |
| LINC01239    | 0.105175219 | 0.272002355 | 1.370824319  | 4.15E-09    | 7.55E-09    |
| KIF15        | 0.176386192 | 0.412722161 | 1.226433279  | 1.61E-23    | 7.78E-23    |
| STAG3        | 0.255987608 | 0.641418715 | 1.325192474  | 2.30E-19    | 8.11E-19    |
| AC007996.1   | 2.845346489 | 0.878342458 | -1.695748897 | 2.25E-34    | 4.19E-33    |
| FAM167A      | 7.074714942 | 0.626412058 | -3.49748813  | 2.73E-39    | 2.70E-37    |
| AC011899.2   | 0.091457122 | 0.624373049 | 2.771240845  | 2.25E-34    | 4.19E-33    |
| AC018695.6   | 0.032841499 | 0.60090292  | 4.193540036  | 6.27E-24    | 3.12E-23    |
| ARL4A        | 2.486525847 | 5.376916156 | 1.112647548  | 6.97E-27    | 4.46E-26    |
| MSH5         | 0.160756603 | 0.771716197 | 2.263192391  | 3.27E-23    | 1.54E-22    |
| PVT1         | 0.124390722 | 3.131098603 | 4.653718156  | 3.04E-42    | 1.36E-39    |
| AL022316.1   | 0.202243716 | 0.585042507 | 1.532446573  | 7.35E-16    | 2.04E-15    |
| THSD1        | 1.260970438 | 2.5754147   | 1.030270304  | 1.75E-14    | 4.43E-14    |
| PLXNA4       | 1.030777932 | 0.183567644 | -2.48934986  | 4.03E-33    | 5.89E-32    |
| IRF7         | 3.246384853 | 10.86632612 | 1.742958307  | 1.53E-29    | 1.29E-28    |
| LINC01389    | 0.156305425 | 0.522615172 | 1.741381159  | 4.61E-16    | 1.29E-15    |
| LINC00707    | 0.160311446 | 1.100786842 | 2.779585792  | 1.53E-21    | 6.32E-21    |
| AC011825.2   | 0.128156525 | 0.412288736 | 1.685748109  | 5.16E-11    | 1.05E-10    |
| MIR616       | 0.694913239 | 1.405163316 | 1.015833047  | 0.024794481 | 0.028682855 |
| SEZ6L2       | 4.18342761  | 20.48151179 | 2.291564832  | 3.70E-28    | 2.67E-27    |
| MIR593       | 0.076113486 | 0.354390781 | 2.219117071  | 1.10E-09    | 2.08E-09    |
| EIF4A1       | 0.425400621 | 1.931569211 | 2.182879328  | 2.49E-27    | 1.66E-26    |
| CLDN14       | 3.549157783 | 0.457722301 | -2.954932223 | 6.21E-37    | 2.45E-35    |
| MTTP         | 2.230482404 | 0.655611941 | -1.766441731 | 7.28E-26    | 4.28E-25    |
| SYTL1        | 0.372823383 | 1.091240262 | 1.549404527  | 6.52E-11    | 1.32E-10    |
| SNORA13      | 0.294125792 | 1.499149015 | 2.349638589  | 1.40E-10    | 2.78E-10    |
| AC100803.2   | 0.47944809  | 1.33449457  | 1.476846907  | 1.12E-11    | 2.39E-11    |
| GPD1         | 42.52470183 | 13.81676874 | -1.62188086  | 3.88E-05    | 5.48E-05    |
| SEPT5        | 1.023569332 | 3.39916611  | 1.731572038  | 2.08E-28    | 1.54E-27    |

Table S1. The differentially expressed genes(DEGs) were screened out in TCGA

| ID         | conMean     | treatMean   | logFC        | pValue      | FDR         |
|------------|-------------|-------------|--------------|-------------|-------------|
| AC012254.4 | 0.077551819 | 0.260368243 | 1.747320969  | 6.92E-09    | 1.24E-08    |
| AC011726.3 | 0.127549163 | 0.288007693 | 1.175053915  | 3.15E-06    | 4.78E-06    |
| LRRC2      | 3.562984708 | 0.32798995  | -3.441362775 | 1.12E-39    | 1.36E-37    |
| TRAV24     | 0.068604758 | 0.681325397 | 3.311963443  | 3.45E-16    | 9.77E-16    |
| AL592211.1 | 0.077969001 | 0.24008405  | 1.622567013  | 1.34E-07    | 2.22E-07    |
| PNP        | 43.28292014 | 15.98834704 | -1.436777042 | 3.13E-35    | 7.19E-34    |
| AC108463.3 | 0.034094906 | 0.455254239 | 3.739044354  | 1.54E-34    | 2.98E-33    |
| ALOX12     | 0.42439849  | 1.025930398 | 1.273441429  | 2.06E-24    | 1.07E-23    |
| GOLGA8VP   | 0.077264523 | 0.680351597 | 3.138402456  | 1.32E-34    | 2.61E-33    |
| CYP8B1     | 5.545651242 | 1.998815599 | -1.472211508 | 8.43E-08    | 1.41E-07    |
| AC015922.2 | 13.50772403 | 6.351987822 | -1.088504558 | 2.46E-26    | 1.51E-25    |
| RPL7AP64   | 0.078852287 | 0.382058297 | 2.276568281  | 1.26E-23    | 6.13E-23    |
| OGN        | 3.634924457 | 1.646940747 | -1.142136731 | 6.32E-16    | 1.76E-15    |
| TRAT1      | 0.215105315 | 1.13876781  | 2.404358538  | 2.03E-24    | 1.05E-23    |
| AP001178.1 | 0.078271207 | 0.316856328 | 2.017275227  | 7.84E-12    | 1.69E-11    |
| RNU6-553P  | 0.110007565 | 0.435183182 | 1.984020063  | 0.000130339 | 0.000178028 |
| SNHG22     | 0.226258552 | 0.790850408 | 1.805432506  | 2.57E-14    | 6.45E-14    |
| ARMH4      | 7.352378422 | 0.628665983 | -3.547845416 | 1.16E-40    | 2.41E-38    |
| RF00271    | 0.068700657 | 1.191303668 | 4.116073504  | 2.73E-16    | 7.77E-16    |
| AC004000.1 | 0.040751675 | 0.331218312 | 3.022851188  | 1.36E-16    | 3.95E-16    |
| COL4A1     | 47.82685222 | 175.3824953 | 1.874612015  | 1.08E-28    | 8.29E-28    |
| ATP6V0A4   | 54.10487869 | 10.95331979 | -2.304390493 | 8.07E-36    | 2.18E-34    |
| RNU6-323P  | 0.095901231 | 0.285262768 | 1.572670227  | 2.14E-05    | 3.07E-05    |
| NICN1      | 10.67157544 | 5.12770258  | -1.057388687 | 1.13E-33    | 1.82E-32    |
| AL606534.1 | 0.058091993 | 0.225937647 | 1.959513438  | 7.38E-18    | 2.33E-17    |
| SEMA6B     | 2.768146275 | 8.425802233 | 1.605893874  | 1.53E-25    | 8.75E-25    |
| HACD1      | 1.253044563 | 0.572055384 | -1.131210987 | 1.67E-18    | 5.53E-18    |
| AL592295.1 | 0.076919283 | 0.256702541 | 1.738680362  | 2.41E-28    | 1.78E-27    |
| RPL36      | 68.96026042 | 159.0903759 | 1.206009436  | 1.69E-31    | 1.84E-30    |
| CAPS       | 8.11307964  | 2.232825295 | -1.861379277 | 1.58E-29    | 1.33E-28    |
| PRAM1      | 0.231288849 | 1.287315347 | 2.476597886  | 2.63E-34    | 4.83E-33    |
| AC078850.2 | 0.835273908 | 0.283142977 | -1.560718628 | 4.58E-21    | 1.82E-20    |
| MIR6719    | 0.041702235 | 0.409065868 | 3.294136564  | 6.78E-14    | 1.66E-13    |
| AC016526.1 | 1.963628987 | 0.016483172 | -6.896384648 | 9.07E-69    | 1.87E-64    |
| AL135786.1 | 0.930436078 | 0.440130972 | -1.079974141 | 1.43E-22    | 6.37E-22    |
| ZNF121     | 1.772190925 | 3.544772564 | 1.000159026  | 1.92E-23    | 9.20E-23    |
| AC004921.1 | 0.137649601 | 0.70423988  | 2.355066504  | 2.66E-34    | 4.86E-33    |
| AC093591.1 | 0.128917485 | 0.272345404 | 1.078989574  | 1.56E-07    | 2.58E-07    |
| LARS2      | 8.510364861 | 3.239198496 | -1.393584107 | 2.69E-35    | 6.31E-34    |
| AC008514.1 | 0.585409759 | 0.265199491 | -1.142368791 | 3.72E-23    | 1.74E-22    |
| CD300E     | 0.593308554 | 1.262101966 | 1.088973983  | 2.01E-13    | 4.77E-13    |
| AL109811.3 | 1.022019646 | 2.404352882 | 1.234225724  | 1.57E-10    | 3.11E-10    |
| EP300-AS1  | 0.400995168 | 0.860205447 | 1.101096416  | 2.14E-13    | 5.06E-13    |
| PPIAP51    | 0.041375373 | 0.23971207  | 2.534458319  | 7.94E-11    | 1.60E-10    |
| CXCL13     | 0.265823874 | 5.028927296 | 4.241708112  | 1.86E-26    | 1.14E-25    |
| RNU6-1010P | 0.155114885 | 0.955465163 | 2.622866133  | 5.09E-08    | 8.64E-08    |
| CD163L1    | 0.458637876 | 1.333879941 | 1.540201412  | 1.34E-13    | 3.21E-13    |
| NOPI6      | 2.895474014 | 6.291194857 | 1.119534498  | 5.53E-33    | 7.87E-32    |
| KC877373.1 | 0.12917878  | 0.656768932 | 2.346016782  | 4.68E-21    | 1.86E-20    |
| PCED1A     | 9.694210139 | 19.58607128 | 1.014632779  | 1.30E-28    | 9.89E-28    |
| GRAP       | 0.498581603 | 1.058952844 | 1.086736791  | 9.63E-19    | 3.24E-18    |
| CKLF       | 2.729053529 | 5.792647343 | 1.085822144  | 2.45E-30    | 2.28E-29    |
| AL021707.4 | 0.165215133 | 0.373676535 | 1.177444137  | 6.12E-08    | 1.04E-07    |
| RRAD       | 11.97482158 | 42.68068958 | 1.833579325  | 2.57E-18    | 8.37E-18    |
| TRIM29     | 0.742175035 | 0.333630763 | -1.153507153 | 3.32E-16    | 9.40E-16    |

Table S1. The differentially expressed genes(DEGs) were screened out in TCGA

| ID         | conMean     | treatMean   | logFC        | pValue      | FDR         |
|------------|-------------|-------------|--------------|-------------|-------------|
| AC116533.1 | 6.67236825  | 17.8562086  | 1.420154968  | 5.86E-25    | 3.18E-24    |
| RASAL1     | 9.719001458 | 4.640343723 | -1.066576424 | 2.72E-09    | 5.01E-09    |
| AC010273.2 | 0.79562018  | 0.142504719 | -2.481070176 | 1.22E-27    | 8.37E-27    |
| AQP7       | 4.311704508 | 2.12444437  | -1.021172744 | 9.82E-19    | 3.30E-18    |
| SERPINA5   | 93.15671236 | 2.961056878 | -4.975475618 | 5.71E-42    | 2.26E-39    |
| C8G        | 0.339359283 | 1.155214376 | 1.767275217  | 3.66E-09    | 6.69E-09    |
| ADGRE5     | 8.435460417 | 18.32753712 | 1.119474208  | 4.42E-25    | 2.42E-24    |
| AP000240.1 | 0.411010175 | 0.919047824 | 1.160965826  | 3.94E-09    | 7.18E-09    |
| HOMER1     | 4.600688806 | 0.983313921 | -2.226125903 | 3.77E-38    | 2.35E-36    |
| TRIM7      | 0.233698838 | 0.645107282 | 1.464888541  | 2.20E-05    | 3.15E-05    |
| FAHD2B     | 2.710464181 | 1.267267061 | -1.096819354 | 4.10E-26    | 2.46E-25    |
| C11orf21   | 0.091988453 | 0.598313302 | 2.701376461  | 4.95E-32    | 5.90E-31    |
| AL023881.1 | 0.177253684 | 0.536215737 | 1.596997948  | 1.68E-18    | 5.54E-18    |
| CD14       | 18.80520831 | 62.83544718 | 1.740446365  | 1.94E-27    | 1.31E-26    |
| MICB       | 0.94848986  | 2.373876505 | 1.323540629  | 6.65E-29    | 5.23E-28    |
| ABCB6      | 0.641922867 | 2.206010897 | 1.780968058  | 7.72E-33    | 1.07E-31    |
| ABCD1      | 3.263849139 | 6.661305298 | 1.02923053   | 1.62E-31    | 1.77E-30    |
| MIR590     | 0.547023436 | 2.027765338 | 1.890216158  | 3.00E-14    | 7.48E-14    |
| C21orf58   | 0.21484195  | 0.528200215 | 1.297809167  | 1.98E-22    | 8.74E-22    |
| FOXD2-AS1  | 0.512954235 | 1.517886158 | 1.565161571  | 2.09E-29    | 1.74E-28    |
| LINC01786  | 0.196841294 | 1.039864447 | 2.401290667  | 1.06E-18    | 3.55E-18    |
| AC073548.1 | 0.229846181 | 0.907966817 | 1.981970875  | 7.68E-17    | 2.27E-16    |
| AC138649.2 | 0.131129049 | 0.407555681 | 1.636009858  | 4.74E-14    | 1.17E-13    |
| AC068722.2 | 0.076708431 | 0.27382581  | 1.835801388  | 2.60E-14    | 6.52E-14    |
| KCNJ4      | 0.126142146 | 0.388570157 | 1.623124724  | 1.15E-08    | 2.04E-08    |
| EPHX2      | 37.34381275 | 14.85866984 | -1.329564261 | 1.70E-26    | 1.05E-25    |
| AL450311.2 | 0.039974938 | 0.496412706 | 3.634372335  | 2.31E-23    | 1.10E-22    |
| BCL2A1     | 0.734244986 | 4.224732377 | 2.52452654   | 3.66E-31    | 3.80E-30    |
| SPDYE6     | 0.133246409 | 0.267955036 | 1.007894272  | 2.92E-10    | 5.70E-10    |
| RN7SKP239  | 0.116488179 | 0.352910214 | 1.599117628  | 8.87E-09    | 1.58E-08    |
| CTAGE9     | 0.020096938 | 0.368114611 | 4.195107404  | 3.71E-29    | 2.99E-28    |
| NLGN1      | 0.863635864 | 3.606112446 | 2.061949324  | 6.46E-28    | 4.55E-27    |
| MTAPP2     | 0.046660908 | 0.266429886 | 2.513469627  | 3.51E-11    | 7.24E-11    |
| IGHV1-58   | 0.889514594 | 3.047616159 | 1.776591029  | 0.024968837 | 0.028874819 |
| AC021188.1 | 0.113572811 | 0.398757986 | 1.811895913  | 1.40E-24    | 7.36E-24    |
| JMJD7-PLA2 | 0.175024358 | 0.531440104 | 1.602351382  | 1.14E-13    | 2.75E-13    |
| AC114316.2 | 0.029381612 | 0.339201182 | 3.529155736  | 3.10E-18    | 1.00E-17    |
| RNU6-850P  | 0.522957382 | 2.393153533 | 2.194147673  | 1.51E-15    | 4.11E-15    |
| AVPR1B     | 0.132594746 | 1.831644103 | 3.788043694  | 3.26E-26    | 1.98E-25    |
| GJC1       | 0.734173093 | 5.01368415  | 2.771678966  | 2.36E-35    | 5.57E-34    |
| AF111167.2 | 1.213197501 | 0.441720877 | -1.457607508 | 3.43E-31    | 3.58E-30    |
| HLA-DRB6   | 11.64693354 | 37.90984239 | 1.702622294  | 2.02E-20    | 7.67E-20    |
| HMMR       | 0.416237058 | 1.063885127 | 1.353865063  | 1.69E-24    | 8.84E-24    |
| ATP8B1     | 10.21866057 | 4.339966684 | -1.235450232 | 7.04E-28    | 4.93E-27    |
| UBTFL6     | 0.086737092 | 0.581771542 | 2.745731753  | 3.82E-27    | 2.50E-26    |
| CKS1BP1    | 1.571136254 | 0.565092302 | -1.47524986  | 5.19E-21    | 2.06E-20    |
| SH2D4A     | 8.939492347 | 3.9428945   | -1.180937798 | 3.83E-24    | 1.94E-23    |
| AL031432.2 | 0.272858007 | 0.666660683 | 1.288802265  | 1.66E-05    | 2.41E-05    |
| SIRPG      | 0.206470924 | 2.189064102 | 3.406303666  | 1.01E-29    | 8.72E-29    |
| SNORA80D   | 0.134128016 | 0.463900331 | 1.790204263  | 0.007433859 | 0.008960672 |
| TSPOAP1-AS | 0.08763831  | 0.261557493 | 1.577494536  | 1.14E-21    | 4.75E-21    |
| MIR6814    | 0.067683469 | 0.326414898 | 2.269831477  | 1.99E-08    | 3.46E-08    |
| TYMP       | 4.304598149 | 33.13173079 | 2.944263104  | 4.69E-37    | 1.94E-35    |
| NMI        | 3.739740986 | 7.611059127 | 1.025158875  | 1.52E-28    | 1.15E-27    |
| DLX4       | 0.047157219 | 0.2955714   | 2.647956119  | 3.46E-24    | 1.76E-23    |

Table S1. The differentially expressed genes(DEGs) were screened out in TCGA

| ID          | conMean     | treatMean   | logFC        | pValue      | FDR         |
|-------------|-------------|-------------|--------------|-------------|-------------|
| AC016737.2  | 0.131868446 | 0.315227121 | 1.257292269  | 3.57E-07    | 5.76E-07    |
| AC011462.3  | 0.006300091 | 0.249144799 | 5.305468084  | 3.67E-10    | 7.10E-10    |
| PLXNB3      | 0.12341833  | 0.500386446 | 2.019486028  | 8.29E-15    | 2.14E-14    |
| RNU6-195P   | 0.095393936 | 0.290009791 | 1.604132139  | 9.56E-05    | 0.000131583 |
| COX6B1P5    | 0.076609555 | 0.306002067 | 1.997945159  | 2.14E-13    | 5.06E-13    |
| AC145422.1  | 0.091010783 | 0.32453466  | 1.834263173  | 3.36E-22    | 1.46E-21    |
| DCST2       | 0.063241944 | 0.263138779 | 2.056870242  | 2.58E-21    | 1.05E-20    |
| TSC22D3     | 35.17360778 | 78.12438941 | 1.151279689  | 2.71E-13    | 6.38E-13    |
| HIST1H2BN   | 0.195867342 | 0.434498837 | 1.149475451  | 2.71E-22    | 1.19E-21    |
| SNORA47     | 0.212425038 | 2.052478161 | 3.27234114   | 5.46E-06    | 8.17E-06    |
| AL078604.1  | 0.101798503 | 0.264260881 | 1.376246532  | 0.000135016 | 0.000184221 |
| AP002414.2  | 0.090934694 | 0.261578387 | 1.524340616  | 0.003249254 | 0.004021137 |
| SREBF2      | 28.61649194 | 11.93171555 | -1.262045335 | 1.42E-35    | 3.57E-34    |
| CGN         | 13.68303333 | 2.540734984 | -2.429070285 | 4.75E-39    | 4.02E-37    |
| AL365181.3  | 0.45737711  | 2.678763996 | 2.550111412  | 1.72E-28    | 1.29E-27    |
| RFX2        | 0.584435593 | 1.650532238 | 1.497815369  | 1.30E-26    | 8.13E-26    |
| TEDC1       | 0.364369845 | 0.792476783 | 1.120965102  | 1.58E-18    | 5.23E-18    |
| FOXC1       | 21.0564401  | 4.6665463   | -2.173834433 | 3.95E-38    | 2.43E-36    |
| BIRC5       | 0.401040877 | 2.170156096 | 2.435977619  | 9.38E-34    | 1.54E-32    |
| CBR3        | 1.333108338 | 3.058347952 | 1.197958525  | 4.62E-18    | 1.48E-17    |
| AC073912.1  | 0.053622199 | 0.230550012 | 2.104177437  | 1.20E-12    | 2.71E-12    |
| AC107057.1  | 4.639346409 | 0.066037213 | -6.13449853  | 3.24E-60    | 1.33E-56    |
| AOX1        | 36.75379622 | 14.05488769 | -1.386821345 | 5.09E-08    | 8.65E-08    |
| AC069200.1  | 0.216003082 | 0.506278344 | 1.228878878  | 9.13E-15    | 2.35E-14    |
| GBP1P1      | 0.7993546   | 2.322642102 | 1.538859324  | 5.24E-18    | 1.67E-17    |
| AC022079.1  | 0.133258471 | 0.590490315 | 2.147686157  | 0.004796084 | 0.005860047 |
| IGHV3-53    | 2.274194994 | 10.78057039 | 2.245005647  | 0.000946178 | 0.0012194   |
| BHLHA15     | 0.221811852 | 1.214245792 | 2.452652126  | 2.64E-16    | 7.52E-16    |
| STAG3L5P-P' | 0.25937769  | 0.989454774 | 1.931579369  | 1.11E-18    | 3.73E-18    |
| EOMES       | 0.180121103 | 2.13525873  | 3.567371772  | 1.25E-33    | 1.99E-32    |
| CTSS        | 10.84665618 | 41.53150929 | 1.936955946  | 2.94E-29    | 2.40E-28    |
| SERPINB9    | 3.436899518 | 9.028936257 | 1.393448353  | 1.78E-29    | 1.49E-28    |
| RF01293     | 0.121500606 | 0.315041745 | 1.374579497  | 2.68E-08    | 4.64E-08    |
| AC017002.3  | 0.067984681 | 0.342852448 | 2.334306212  | 4.16E-28    | 3.00E-27    |
| PILRA       | 2.016723426 | 6.333978652 | 1.651098759  | 5.36E-30    | 4.78E-29    |
| ATP5F1A     | 95.36683153 | 39.83353698 | -1.259503998 | 1.78E-34    | 3.39E-33    |
| LINC00672   | 0.235154671 | 0.530694902 | 1.1742727    | 1.28E-19    | 4.58E-19    |
| C9orf92     | 0.134011949 | 0.294482057 | 1.135818093  | 2.41E-06    | 3.69E-06    |
| RNU6-1280P  | 0.157872763 | 0.936596579 | 2.568665475  | 6.25E-13    | 1.44E-12    |
| MYC         | 12.39717535 | 35.53526388 | 1.519239967  | 3.09E-23    | 1.45E-22    |
| STC2        | 1.485266486 | 23.58730573 | 3.989216928  | 4.29E-38    | 2.62E-36    |
| LRR37A4P    | 0.697724151 | 0.324102468 | -1.106206767 | 1.52E-17    | 4.70E-17    |
| SAMD14      | 0.407015226 | 1.27276279  | 1.644808892  | 7.13E-30    | 6.25E-29    |
| MGAT3-AS1   | 0.112894884 | 0.340259204 | 1.59165408   | 4.19E-11    | 8.60E-11    |
| AC010655.2  | 0.069154883 | 2.866902601 | 5.373517969  | 5.41E-38    | 3.17E-36    |
| AC142381.1  | 0.125853967 | 0.476533867 | 1.920828059  | 0.010286533 | 0.012255029 |
| AC011753.4  | 0.258602439 | 0.652233441 | 1.334652532  | 4.73E-07    | 7.57E-07    |
| BMP5        | 0.843819914 | 0.349110677 | -1.273250655 | 9.95E-07    | 1.56E-06    |
| AP003390.1  | 0.138547098 | 0.289435604 | 1.062865913  | 1.19E-07    | 1.97E-07    |
| RN7SL81P    | 0.124909661 | 0.595919181 | 2.254231616  | 4.58E-17    | 1.37E-16    |
| PKP1        | 0.395648573 | 1.676896228 | 2.083501953  | 0.015341231 | 0.018015365 |
| PCDHGA1     | 0.137991355 | 0.360742152 | 1.386390128  | 7.55E-11    | 1.52E-10    |
| AC005785.1  | 0.121053028 | 0.610457021 | 2.334250555  | 9.01E-29    | 6.97E-28    |
| AC245014.3  | 0.130700251 | 0.309988046 | 1.245950677  | 2.20E-06    | 3.37E-06    |
| C17orf49    | 0.301929227 | 0.609863672 | 1.014276362  | 1.15E-25    | 6.65E-25    |

Table S1. The differentially expressed genes(DEGs) were screened out in TCGA

| ID         | conMean     | treatMean   | logFC        | pValue      | FDR         |
|------------|-------------|-------------|--------------|-------------|-------------|
| CSF3R      | 0.361273153 | 2.497306914 | 2.789211182  | 4.99E-36    | 1.42E-34    |
| TTL3       | 0.590351371 | 1.842802471 | 1.642255646  | 5.53E-13    | 1.28E-12    |
| U62317.4   | 0.056263419 | 0.352408609 | 2.646980041  | 7.80E-20    | 2.85E-19    |
| AL355488.1 | 0.557591263 | 1.825068095 | 1.710670434  | 1.18E-16    | 3.45E-16    |
| UBE2Q1-AS1 | 0.096730846 | 0.431441603 | 2.157117384  | 6.45E-19    | 2.20E-18    |
| PIGR       | 126.4306192 | 45.10173928 | -1.487090925 | 5.71E-24    | 2.86E-23    |
| AP001029.1 | 0.054674511 | 0.544214524 | 3.315235132  | 3.22E-17    | 9.75E-17    |
| IGSF3      | 13.53368979 | 6.129332416 | -1.142753371 | 9.39E-32    | 1.06E-30    |
| RAB25      | 24.559332   | 1.952179182 | -3.653113938 | 4.41E-37    | 1.84E-35    |
| CASR       | 24.75163581 | 0.537988906 | -5.523803641 | 1.70E-40    | 3.24E-38    |
| GFOD1      | 0.884287365 | 1.907179594 | 1.108853524  | 3.86E-14    | 9.57E-14    |
| SNHG25     | 0.347610737 | 1.310574896 | 1.914655252  | 1.77E-16    | 5.10E-16    |
| LY6K       | 0.556455536 | 0.21208346  | -1.3916343   | 2.72E-26    | 1.66E-25    |
| KLRA1P     | 0.310575245 | 1.112915896 | 1.841329826  | 4.38E-23    | 2.04E-22    |
| ANKRD23    | 0.076018372 | 0.238487592 | 1.64949417   | 7.76E-19    | 2.62E-18    |
| HSPB7      | 14.64025027 | 1.421711648 | -3.364239424 | 4.29E-34    | 7.58E-33    |
| SCARNA12   | 0.111366675 | 2.97258363  | 4.738327904  | 2.28E-18    | 7.46E-18    |
| ZNF436-AS1 | 0.579544875 | 1.294033553 | 1.158882745  | 4.77E-18    | 1.53E-17    |
| NADK2-AS1  | 0.219760282 | 0.472340478 | 1.103896508  | 3.58E-08    | 6.15E-08    |
| AC073115.2 | 0.025104265 | 2.518519716 | 6.648499744  | 1.11E-33    | 1.79E-32    |
| ALAD       | 26.21698472 | 11.20367232 | -1.226530074 | 1.69E-32    | 2.21E-31    |
| SPARCL1    | 54.94232603 | 168.6541579 | 1.618077991  | 5.60E-21    | 2.22E-20    |
| LINC01230  | 2.447812963 | 0.748823498 | -1.708795714 | 2.60E-39    | 2.61E-37    |
| RNU6-282P  | 0.216498194 | 0.679551388 | 1.650227659  | 1.79E-08    | 3.13E-08    |
| COL11A1    | 0.110262257 | 1.165161854 | 3.401519426  | 0.000391286 | 0.000516948 |
| MRPL33     | 34.77965833 | 16.2979883  | -1.09354986  | 2.57E-37    | 1.18E-35    |
| RNA5SP160  | 0.083272469 | 0.280885895 | 1.754072677  | 0.004215928 | 0.005172985 |
| GOLGA8M    | 0.063319622 | 0.265518763 | 2.068089267  | 1.36E-16    | 3.95E-16    |
| CDCA2      | 0.30070131  | 5.890745275 | 4.292047113  | 1.41E-38    | 1.01E-36    |
| AC026471.4 | 1.584314883 | 3.727187667 | 1.234228361  | 4.03E-18    | 1.30E-17    |
| WT1        | 5.661493042 | 0.999446581 | -2.501981205 | 1.21E-19    | 4.35E-19    |
| AC116158.1 | 0.07993446  | 0.236465109 | 1.564737838  | 8.70E-09    | 1.55E-08    |
| AC104667.2 | 1.149316144 | 0.400936751 | -1.519329128 | 1.63E-26    | 1.01E-25    |
| AL356299.2 | 0.079288104 | 0.278488203 | 1.812439889  | 1.63E-12    | 3.65E-12    |
| AC010168.2 | 0.390521513 | 0.900633931 | 1.205538806  | 9.29E-12    | 1.99E-11    |
| AL356361.2 | 0.202588884 | 0.41618998  | 1.038687216  | 0.004833105 | 0.005904929 |
| PRC1       | 0.993881574 | 2.532202408 | 1.349246867  | 3.81E-30    | 3.47E-29    |
| TRGJP2     | 0.115550072 | 0.363523907 | 1.653532084  | 4.30E-06    | 6.47E-06    |
| ANKK1      | 0.062672516 | 0.292614868 | 2.22309826   | 3.62E-23    | 1.69E-22    |
| AC011479.1 | 0.53367501  | 0.253684763 | -1.072924586 | 6.04E-18    | 1.92E-17    |
| DCLK1      | 0.495332021 | 2.182194352 | 2.139311805  | 6.89E-25    | 3.72E-24    |
| KCNMB1     | 0.721313458 | 1.622350237 | 1.169387058  | 5.49E-19    | 1.88E-18    |
| AC022306.3 | 0.252977245 | 0.55730951  | 1.139471148  | 1.03E-11    | 2.19E-11    |
| BRICD5     | 0.515928306 | 1.117340702 | 1.114826657  | 1.24E-05    | 1.82E-05    |
| AC016737.1 | 0.114970535 | 0.346130068 | 1.590050104  | 4.40E-10    | 8.47E-10    |
| TBX19      | 0.492261961 | 1.488782934 | 1.596635256  | 7.11E-31    | 7.10E-30    |
| KCCAT198   | 0.281170306 | 2.621190686 | 3.220706163  | 3.28E-28    | 2.39E-27    |
| HIBCH      | 12.27786082 | 5.346094034 | -1.199502102 | 3.47E-20    | 1.30E-19    |
| AC090152.1 | 1.603297864 | 0.564576993 | -1.505800233 | 3.26E-28    | 2.37E-27    |
| FGFR2      | 11.88838857 | 4.92208734  | -1.272211013 | 9.34E-28    | 6.45E-27    |
| GAB3       | 0.56600116  | 1.789048151 | 1.660315303  | 3.06E-33    | 4.55E-32    |
| LURAP1     | 3.753048014 | 1.096671007 | -1.774931954 | 3.87E-34    | 6.91E-33    |
| AC092755.1 | 0.08794661  | 0.260835793 | 1.568441989  | 5.58E-05    | 7.80E-05    |
| AP003170.3 | 0.1200589   | 0.445710867 | 1.892365784  | 7.08E-10    | 1.35E-09    |
| CTDSPL     | 24.56505213 | 10.71440904 | -1.197055021 | 7.53E-36    | 2.06E-34    |

Table S1. The differentially expressed genes(DEGs) were screened out in TCGA

| ID         | conMean     | treatMean   | logFC        | pValue      | FDR         |
|------------|-------------|-------------|--------------|-------------|-------------|
| U2AF1L4    | 1.304752518 | 2.900273057 | 1.152412548  | 2.47E-16    | 7.06E-16    |
| CACNA2D2   | 1.648251247 | 0.340372415 | -2.275750149 | 2.08E-39    | 2.19E-37    |
| COL5A2     | 4.043147458 | 16.81573731 | 2.056261311  | 1.72E-28    | 1.29E-27    |
| U91328.3   | 0.17870165  | 0.427265766 | 1.257580771  | 3.44E-07    | 5.54E-07    |
| AC016586.1 | 0.119978526 | 0.317253471 | 1.40285974   | 2.41E-08    | 4.17E-08    |
| HLA-C      | 265.9387185 | 677.5405253 | 1.349213403  | 1.28E-32    | 1.71E-31    |
| LINC02585  | 0.269198933 | 0.702718029 | 1.384273221  | 8.69E-11    | 1.75E-10    |
| AC010378.1 | 0.047632456 | 0.414771367 | 3.122299462  | 1.21E-15    | 3.32E-15    |
| HMG2N2P47  | 0.155827437 | 1.330675826 | 3.094137966  | 1.03E-23    | 5.02E-23    |
| CBLC       | 4.100831594 | 0.988518325 | -2.052576883 | 3.19E-34    | 5.78E-33    |
| KLRC1      | 0.061161691 | 0.233621995 | 1.933475905  | 1.68E-20    | 6.45E-20    |
| AC108463.1 | 0.698628984 | 3.719427627 | 2.412482224  | 5.56E-35    | 1.21E-33    |
| AL157834.1 | 0.108922803 | 0.254612033 | 1.224994591  | 0.005065048 | 0.006176215 |
| BIRC7      | 0.071508884 | 9.151525041 | 6.999745885  | 4.94E-32    | 5.88E-31    |
| PIEZO2     | 0.508548284 | 2.37200824  | 2.221652358  | 4.78E-27    | 3.10E-26    |
| RN7SL648P  | 0.02225423  | 0.683920905 | 4.941677999  | 4.28E-13    | 9.96E-13    |
| AC099791.2 | 0.058577733 | 0.233224535 | 1.993295292  | 5.99E-10    | 1.14E-09    |
| BBIP1P1    | 0.0951179   | 0.246963311 | 1.376507963  | 0.00019034  | 0.000256999 |
| ATF3       | 46.77667497 | 20.46374967 | -1.192718793 | 1.17E-09    | 2.20E-09    |
| AL035446.1 | 0.139378666 | 0.699667281 | 2.32765928   | 2.69E-17    | 8.21E-17    |
| MYOT       | 0.235480579 | 0.666819881 | 1.501689037  | 3.93E-06    | 5.93E-06    |
| AC000078.1 | 0.103484055 | 0.400117095 | 1.951013777  | 4.23E-17    | 1.27E-16    |
| CDHR3      | 0.469942198 | 1.335962468 | 1.507324254  | 8.92E-25    | 4.77E-24    |
| SNX22      | 0.306342049 | 0.730311745 | 1.253369027  | 1.21E-21    | 5.04E-21    |
| AL159169.2 | 0.141663383 | 0.4179915   | 1.561006702  | 2.31E-14    | 5.79E-14    |
| SCARF1     | 2.366696394 | 7.057962935 | 1.576377208  | 7.62E-29    | 5.94E-28    |
| ZG16B      | 0.118213526 | 0.254448019 | 1.105975842  | 1.50E-08    | 2.64E-08    |
| MIR155HG   | 0.252438202 | 2.736779781 | 3.438477195  | 5.68E-33    | 8.03E-32    |
| AGAP12P    | 0.116816954 | 0.427128794 | 1.87042149   | 2.72E-06    | 4.14E-06    |
| RHOH       | 0.232214088 | 1.114850157 | 2.263322408  | 2.23E-28    | 1.65E-27    |
| IGLV1-36   | 1.152643858 | 4.21611198  | 1.870966366  | 0.000194511 | 0.000262442 |
| LINC00265  | 0.58954685  | 1.234460668 | 1.0662025    | 1.47E-07    | 2.43E-07    |
| SIM2       | 5.444617059 | 0.239558702 | -4.506379457 | 1.10E-39    | 1.35E-37    |
| IGKV5-2    | 0.547297696 | 5.30014141  | 3.275633164  | 0.000453944 | 0.000597023 |
| AC112907.2 | 0.535356871 | 0.223415455 | -1.260771929 | 6.14E-23    | 2.83E-22    |
| MAP4K4     | 5.792544083 | 13.50943053 | 1.221697838  | 1.42E-31    | 1.56E-30    |
| MIR4292    | 0.837193114 | 2.560691853 | 1.612901303  | 5.44E-13    | 1.26E-12    |
| RTP4       | 3.341271958 | 11.26588039 | 1.753490741  | 6.81E-27    | 4.36E-26    |
| C2orf40    | 9.485873918 | 2.445620058 | -1.955580403 | 1.89E-24    | 9.82E-24    |
| MPPED2     | 3.329367488 | 0.576930047 | -2.528779814 | 6.99E-38    | 3.89E-36    |
| SLC4A8     | 0.825652725 | 0.128299124 | -2.686023779 | 7.99E-30    | 6.94E-29    |
| AC092375.2 | 0.07211339  | 0.279618851 | 1.955122556  | 3.10E-14    | 7.73E-14    |
| AC008554.1 | 0.809076076 | 1.642379152 | 1.021439951  | 3.42E-09    | 6.25E-09    |
| AP002490.1 | 0.115635287 | 0.305464432 | 1.401422691  | 1.63E-15    | 4.43E-15    |
| FUT3       | 2.890358762 | 0.618730985 | -2.223864387 | 3.12E-13    | 7.32E-13    |
| MST1L      | 5.617494215 | 0.833366217 | -2.752904212 | 2.98E-33    | 4.43E-32    |
| AC092919.2 | 0.267139227 | 0.568344674 | 1.089174281  | 5.72E-17    | 1.70E-16    |
| PBX1       | 7.006295639 | 2.743029466 | -1.352881746 | 6.62E-33    | 9.26E-32    |
| BUB1B      | 0.386532038 | 0.950255533 | 1.297727523  | 1.33E-23    | 6.45E-23    |
| AC141002.1 | 0.183337668 | 0.541174402 | 1.561590372  | 6.20E-14    | 1.52E-13    |
| KITLG      | 21.52851915 | 6.954415999 | -1.630247813 | 3.34E-31    | 3.50E-30    |
| NAALADL2   | 1.875741896 | 0.504957008 | -1.893228859 | 1.00E-38    | 7.50E-37    |
| AP001381.1 | 0.026085639 | 0.229153372 | 3.134985826  | 8.46E-13    | 1.93E-12    |
| AC087277.2 | 0.046342678 | 0.226936451 | 2.291875054  | 4.83E-07    | 7.73E-07    |
| SVIP       | 11.43453382 | 5.692939156 | -1.006151963 | 1.08E-33    | 1.75E-32    |

Table S1. The differentially expressed genes(DEGs) were screened out in TCGA

| ID          | conMean     | treatMean   | logFC        | pValue      | FDR         |
|-------------|-------------|-------------|--------------|-------------|-------------|
| WNT9B       | 3.030977214 | 0.160114388 | -4.242608143 | 7.69E-41    | 1.82E-38    |
| AC136475.10 | 0.280333681 | 1.361817251 | 2.280316123  | 1.68E-23    | 8.11E-23    |
| AC079310.1  | 2.567111602 | 0.005007551 | -9.00182507  | 3.58E-65    | 1.84E-61    |
| AC114402.1  | 0.085288147 | 0.416867369 | 2.28917128   | 2.62E-15    | 7.03E-15    |
| AC079203.1  | 0.124592013 | 0.429984928 | 1.787074497  | 4.62E-12    | 1.01E-11    |
| MEF2C       | 3.684021653 | 9.267532839 | 1.330903781  | 2.35E-24    | 1.21E-23    |
| AJM1        | 0.428488755 | 1.840859533 | 2.103050298  | 1.59E-35    | 3.96E-34    |
| IGHA2       | 13.1693102  | 57.92937063 | 2.137115211  | 1.60E-08    | 2.81E-08    |
| TMEM61      | 8.100909502 | 0.931356391 | -3.120678653 | 7.55E-36    | 2.06E-34    |
| STAMBPL1    | 0.455687776 | 2.585089948 | 2.504096903  | 1.59E-36    | 5.35E-35    |
| CYP2D6      | 0.186867523 | 0.527322535 | 1.496669796  | 1.65E-06    | 2.56E-06    |
| IGHV1OR15-1 | 0.218250844 | 0.881339321 | 2.013710341  | 0.000182888 | 0.000247212 |
| AC026979.3  | 0.31732303  | 0.650743349 | 1.03613643   | 2.90E-17    | 8.83E-17    |
| TDRD9       | 1.368749538 | 0.671781802 | -1.026793857 | 3.74E-20    | 1.39E-19    |
| MZT2B       | 14.92501633 | 32.29747328 | 1.113688793  | 8.54E-25    | 4.57E-24    |
| AL162274.1  | 0.059669646 | 0.455871669 | 2.933558634  | 7.55E-30    | 6.58E-29    |
| C16orf54    | 0.588778888 | 2.061638855 | 1.807993787  | 2.51E-25    | 1.40E-24    |
| RNVU1-3     | 0.159660863 | 0.746680368 | 2.225480087  | 1.34E-13    | 3.22E-13    |
| LINC02348   | 0.133107015 | 7.995378152 | 5.908507757  | 1.23E-35    | 3.15E-34    |
| SULF1       | 6.141353536 | 13.40203291 | 1.125823294  | 2.94E-10    | 5.73E-10    |
| AC079250.1  | 0.468076097 | 1.07010001  | 1.192930636  | 2.43E-21    | 9.92E-21    |
| C1QTNF1     | 5.973205875 | 13.32443387 | 1.157496885  | 1.59E-11    | 3.35E-11    |
| CDKN3       | 0.414006472 | 1.510654293 | 1.867448318  | 1.85E-31    | 2.01E-30    |
| CARMIL2     | 0.089130701 | 0.515061262 | 2.530749673  | 4.72E-28    | 3.37E-27    |
| AC019206.1  | 0.030126716 | 0.224953746 | 2.900513069  | 1.02E-15    | 2.80E-15    |
| DDN         | 8.607555135 | 0.110987796 | -6.277130564 | 1.65E-17    | 5.09E-17    |
| ZP3         | 0.67016821  | 1.945932893 | 1.537866801  | 7.81E-19    | 2.64E-18    |
| IGLV1-40    | 13.55344794 | 177.9843242 | 3.715018364  | 3.31E-07    | 5.35E-07    |
| MAN1C1      | 7.811620074 | 1.671384156 | -2.224578419 | 1.08E-36    | 3.89E-35    |
| MYBPC2      | 0.136365314 | 0.274356372 | 1.00857436   | 0.002699977 | 0.003359966 |
| KRT86       | 0.244828783 | 0.700315552 | 1.516231951  | 8.05E-13    | 1.84E-12    |
| AL136295.2  | 0.186265177 | 0.643394003 | 1.788344508  | 2.34E-18    | 7.64E-18    |
| RIN1        | 0.472756317 | 1.888164688 | 1.997815964  | 6.36E-30    | 5.62E-29    |
| ZNF296      | 0.322364889 | 0.926108443 | 1.522486518  | 1.44E-24    | 7.57E-24    |
| RN7SL827P   | 0.038007997 | 0.279570986 | 2.878839735  | 0.00130917  | 0.001670686 |
| RPL18AP3    | 6.639690333 | 13.73166218 | 1.048318407  | 1.01E-16    | 2.97E-16    |
| AC005262.1  | 0.024696438 | 0.26332904  | 3.414491723  | 2.96E-11    | 6.14E-11    |
| RRM2P3      | 0.170691252 | 0.576209689 | 1.755204794  | 1.61E-12    | 3.60E-12    |
| CERS3-AS1   | 0.046829572 | 0.261087029 | 2.479039023  | 2.38E-16    | 6.81E-16    |
| AP001893.1  | 0.142670722 | 0.373387435 | 1.387984075  | 1.55E-09    | 2.90E-09    |
| GABRD       | 0.240042364 | 8.697100451 | 5.179173548  | 1.67E-40    | 3.21E-38    |
| CD207       | 0.311498513 | 0.872375333 | 1.485723701  | 1.06E-09    | 2.00E-09    |
| NARF-IT1    | 0.09580311  | 0.423671537 | 2.144801808  | 1.37E-17    | 4.26E-17    |
| AC090578.2  | 0.058568884 | 0.371912978 | 2.666758789  | 1.14E-09    | 2.14E-09    |
| RN7SKP287   | 0.08254428  | 0.231892563 | 1.490216396  | 6.45E-06    | 9.59E-06    |
| TAS2R6P     | 0.06481485  | 0.280608522 | 2.114162522  | 2.10E-19    | 7.42E-19    |
| AL138689.1  | 0.114618391 | 0.358602639 | 1.645547558  | 4.00E-08    | 6.84E-08    |
| AC004771.1  | 0.128572671 | 0.534126832 | 2.05459834   | 1.76E-23    | 8.46E-23    |
| RNU6-767P   | 0.045716456 | 0.284108972 | 2.635658932  | 6.59E-06    | 9.79E-06    |
| REELD1      | 0.114162678 | 0.6019447   | 2.398539873  | 2.47E-15    | 6.61E-15    |
| C8orf34-AS1 | 0.53785169  | 0.212104788 | -1.342431227 | 1.03E-07    | 1.71E-07    |
| TTC34       | 0.15396174  | 0.409779575 | 1.412276193  | 9.11E-14    | 2.20E-13    |
| HCG27       | 0.202245276 | 1.578450712 | 2.964331305  | 3.72E-32    | 4.51E-31    |
| AC007014.2  | 0.085436667 | 0.240164737 | 1.491097064  | 0.001873956 | 0.002360561 |
| TET3        | 1.00310026  | 2.081579382 | 1.053212767  | 1.40E-27    | 9.54E-27    |

Table S1. The differentially expressed genes(DEGs) were screened out in TCGA

| ID                      | conMean     | treatMean   | logFC        | pValue      | FDR         |
|-------------------------|-------------|-------------|--------------|-------------|-------------|
| LDLRAD2                 | 0.427261588 | 0.978568471 | 1.195553182  | 9.06E-16    | 2.50E-15    |
| ENPP7P4                 | 0.054145798 | 0.221583111 | 2.032926627  | 1.78E-15    | 4.81E-15    |
| STBD1                   | 0.658204442 | 1.337823978 | 1.023280641  | 1.20E-22    | 5.37E-22    |
| THSD4                   | 5.258344167 | 1.327032486 | -1.986404883 | 1.57E-35    | 3.90E-34    |
| ACY1                    | 8.587370308 | 1.968624897 | -2.12502816  | 2.08E-14    | 5.23E-14    |
| AC022146.2              | 0.071906969 | 0.365103135 | 2.344100553  | 4.75E-08    | 8.09E-08    |
| AC017083.1              | 0.119154114 | 0.28328898  | 1.249445718  | 8.72E-07    | 1.37E-06    |
| LOH12CR2                | 2.218925494 | 0.832062664 | -1.415097137 | 7.67E-36    | 2.09E-34    |
| ABCA17P                 | 0.073018171 | 0.397766159 | 2.4455931    | 4.36E-26    | 2.61E-25    |
| STX4                    | 6.536388778 | 14.75849637 | 1.174980043  | 1.79E-36    | 5.86E-35    |
| SLC25A48                | 1.683597485 | 0.839941552 | -1.003186414 | 6.45E-14    | 1.58E-13    |
| GGT3P                   | 0.109141111 | 0.382796071 | 1.810381392  | 5.51E-05    | 7.70E-05    |
| AC120349.1              | 0.091197574 | 0.461079749 | 2.337948952  | 2.76E-06    | 4.20E-06    |
| KIF21B                  | 0.185122881 | 0.835087992 | 2.173445003  | 6.06E-32    | 7.13E-31    |
| AP000439.2              | 0.151633392 | 11.75354171 | 6.276364246  | 6.46E-31    | 6.48E-30    |
| MTURN                   | 43.96015165 | 5.315204534 | -3.047999249 | 5.26E-40    | 7.56E-38    |
| AC060780.2              | 0.298835864 | 0.825658009 | 1.466191034  | 1.60E-11    | 3.37E-11    |
| CASC2                   | 0.802866151 | 0.375632532 | -1.095837478 | 8.16E-34    | 1.36E-32    |
| CD300LF                 | 0.324951005 | 2.637871036 | 3.021079917  | 1.03E-37    | 5.39E-36    |
| HOXD10                  | 10.65641832 | 4.208876471 | -1.340215549 | 9.20E-26    | 5.35E-25    |
| AC040162.1              | 0.1188522   | 0.524543404 | 2.141893542  | 2.67E-31    | 2.83E-30    |
| ADAM12                  | 0.474845348 | 1.693797274 | 1.834731586  | 5.60E-12    | 1.21E-11    |
| AC009237.15             | 1.808554378 | 0.679507988 | -1.412274561 | 2.71E-17    | 8.27E-17    |
| ZNF812P                 | 0.265407519 | 0.801803052 | 1.595038667  | 8.18E-14    | 1.99E-13    |
| SNORA22                 | 0.125396237 | 1.770395218 | 3.819505502  | 2.91E-12    | 6.43E-12    |
| RRN3P1                  | 0.370900363 | 1.238297516 | 1.739254398  | 9.34E-26    | 5.43E-25    |
| RFLNB                   | 5.885368681 | 16.43264048 | 1.481359619  | 8.12E-23    | 3.69E-22    |
| C20orf204               | 0.049870941 | 0.221980375 | 2.154160794  | 1.24E-29    | 1.06E-28    |
| RF00586                 | 0.102581515 | 0.443255314 | 2.111367149  | 2.09E-15    | 5.63E-15    |
| AP000525.1              | 0.029578894 | 0.315738456 | 3.416089953  | 7.40E-25    | 3.98E-24    |
| AC055822.1              | 0.68425456  | 1.398370649 | 1.03114176   | 3.80E-08    | 6.52E-08    |
| AL135818.1              | 0.11022747  | 0.382355217 | 1.794429758  | 3.36E-24    | 1.71E-23    |
| XCL2                    | 0.332617371 | 1.964680643 | 2.562359401  | 1.73E-27    | 1.17E-26    |
| CD72                    | 0.362359888 | 2.408438665 | 2.732603018  | 1.21E-36    | 4.31E-35    |
| IGHV3OR16 <sup>-1</sup> | 0.139533964 | 0.593129785 | 2.08773149   | 0.001259202 | 0.001609016 |
| GRIK5                   | 3.975263275 | 0.47426275  | -3.067291946 | 1.26E-35    | 3.23E-34    |
| IGLV1-47                | 6.388097263 | 36.16840818 | 2.50127192   | 5.42E-07    | 8.63E-07    |
| HVCN1                   | 1.153553765 | 3.074663402 | 1.414343233  | 4.40E-31    | 4.51E-30    |
| BCAS1                   | 1.135993156 | 0.265547225 | -2.096913782 | 1.25E-27    | 8.52E-27    |
| IQCH                    | 0.771928465 | 0.350523242 | -1.138957052 | 9.79E-32    | 1.10E-30    |
| AURKB                   | 0.239296783 | 1.492426949 | 2.64078741   | 1.21E-34    | 2.41E-33    |
| ASPHD2                  | 3.037128517 | 1.506172095 | -1.011821336 | 8.10E-15    | 2.10E-14    |
| IDNK                    | 9.539671139 | 4.362789364 | -1.128688711 | 1.70E-21    | 7.04E-21    |
| AC026470.2              | 0.087652962 | 0.2343489   | 1.418783268  | 0.000395277 | 0.000522099 |
| AC023510.2              | 0.389696731 | 0.822939011 | 1.078433686  | 2.93E-09    | 5.38E-09    |
| AP001542.1              | 0.130251227 | 0.557855375 | 2.098594187  | 8.33E-10    | 1.58E-09    |
| AC092802.2              | 0.098922764 | 0.273020706 | 1.46463592   | 2.41E-13    | 5.69E-13    |
| KLF8                    | 1.073093207 | 2.580757368 | 1.26601912   | 5.49E-21    | 2.17E-20    |
| RIMKLA                  | 0.73349814  | 3.772760422 | 2.362755276  | 2.25E-29    | 1.86E-28    |
| HIST1H2BJ               | 0.334983721 | 0.77177479  | 1.204088929  | 8.13E-07    | 1.28E-06    |
| PRIMA1                  | 1.306181793 | 10.53584956 | 3.011879042  | 4.16E-07    | 6.68E-07    |
| AC010320.3              | 0.103723629 | 0.278460344 | 1.424727301  | 4.27E-10    | 8.23E-10    |
| DDX11-AS1               | 0.094439867 | 0.214951235 | 1.186541481  | 2.43E-20    | 9.15E-20    |
| SLC16A8                 | 0.098107919 | 0.426491983 | 2.120077126  | 2.98E-21    | 1.21E-20    |
| CYP2C8                  | 0.410565796 | 1.538445777 | 1.90578825   | 6.34E-11    | 1.28E-10    |



Table S1. The differentially expressed genes(DEGs) were screened out in TCGA

| ID                    | conMean     | treatMean   | logFC        | pValue      | FDR         |
|-----------------------|-------------|-------------|--------------|-------------|-------------|
| TLR10                 | 0.142757554 | 0.527868606 | 1.886611782  | 3.06E-20    | 1.15E-19    |
| UGT3A1                | 12.02704756 | 4.955951983 | -1.279048413 | 4.07E-21    | 1.63E-20    |
| AL031600.1            | 0.195917986 | 0.820075824 | 2.065507457  | 1.04E-12    | 2.35E-12    |
| FAM198B-AS0.162115403 | 0.357786613 | 1.142078241 | 3.01E-10     | 5.86E-10    |             |
| AKR7A3                | 27.92207006 | 9.749449963 | -1.51801317  | 7.07E-11    | 1.43E-10    |
| CPA3                  | 2.487805381 | 6.519299786 | 1.389843389  | 2.64E-15    | 7.07E-15    |
| TMEM255B              | 0.968235996 | 2.804660538 | 1.53439553   | 5.51E-26    | 3.27E-25    |
| AC108010.1            | 0.899406101 | 1.824884558 | 1.020760626  | 4.00E-10    | 7.71E-10    |
| IGHV3OR16-            | 0.145689188 | 0.784173812 | 2.428279652  | 0.000151861 | 0.000206424 |
| AP000688.2            | 2.14459959  | 0.75867584  | -1.499152812 | 5.90E-22    | 2.52E-21    |
| RPL35P5               | 1.347575649 | 2.709464708 | 1.007641592  | 2.66E-13    | 6.28E-13    |
| LINC01569             | 1.178833046 | 2.364011198 | 1.003877461  | 5.50E-15    | 1.44E-14    |
| SNRPGP4               | 0.252143734 | 0.976330704 | 1.953123526  | 2.28E-05    | 3.27E-05    |
| AC083837.1            | 0.074267851 | 0.244609852 | 1.719672775  | 3.17E-20    | 1.19E-19    |
| CDKN2A                | 0.063563294 | 1.927830869 | 4.922640777  | 7.21E-42    | 2.76E-39    |
| MXD3                  | 0.167789047 | 0.994298896 | 2.567031061  | 7.34E-36    | 2.01E-34    |
| MIR1270               | 0.414501792 | 4.529858341 | 3.450015692  | 1.62E-25    | 9.23E-25    |
| AP002807.1            | 0.311513802 | 0.848759094 | 1.446059045  | 3.83E-09    | 6.97E-09    |
| C3orf52               | 2.357702238 | 0.598380986 | -1.978245289 | 2.58E-31    | 2.74E-30    |
| LINC02061             | 6.409707789 | 0.701613794 | -3.19150957  | 8.42E-20    | 3.06E-19    |
| ST8SIA4               | 0.6926729   | 8.452596733 | 3.609148485  | 2.24E-39    | 2.33E-37    |
| TRGV10                | 0.161556216 | 1.184493175 | 2.874161723  | 1.45E-29    | 1.23E-28    |
| AC073210.1            | 0.155735206 | 0.368908534 | 1.24416804   | 8.03E-05    | 0.00011106  |
| ERCC6L                | 0.086382909 | 0.250520941 | 1.536113393  | 1.58E-30    | 1.51E-29    |
| AC027514.2            | 0.12401347  | 0.317380409 | 1.355716248  | 3.51E-07    | 5.66E-07    |
| NFE2L3                | 3.722489306 | 9.644068239 | 1.373374155  | 2.68E-22    | 1.17E-21    |
| AP5M1                 | 6.512073167 | 3.12324117  | -1.060072934 | 3.24E-36    | 9.67E-35    |
| FGF14-AS2             | 6.540842881 | 2.856416962 | -1.195269969 | 1.39E-27    | 9.47E-27    |
| UBE2L6                | 25.02473708 | 53.18577449 | 1.08768551   | 1.31E-30    | 1.26E-29    |
| VWA5B1                | 0.702445221 | 0.193473568 | -1.860249244 | 1.81E-36    | 5.92E-35    |
| PTPRJ-AS1             | 0.030315566 | 0.556486641 | 4.198216412  | 8.05E-05    | 0.000111392 |
| HCP5                  | 9.270478486 | 22.60989337 | 1.286238479  | 6.51E-28    | 4.58E-27    |
| GBP4                  | 10.09476213 | 24.64491333 | 1.287682992  | 7.02E-16    | 1.95E-15    |
| LINC00996             | 0.069649995 | 0.226331137 | 1.700239918  | 1.16E-17    | 3.63E-17    |
| FCHSD1                | 1.168174426 | 2.889019307 | 1.306324139  | 4.51E-23    | 2.10E-22    |
| AC040162.3            | 0.083759987 | 0.390618159 | 2.22142589   | 2.31E-25    | 1.30E-24    |
| SLC35G2               | 1.014886201 | 2.726154997 | 1.425549622  | 7.62E-29    | 5.94E-28    |
| CCL28                 | 2.527795814 | 7.263620979 | 1.522808991  | 1.43E-15    | 3.90E-15    |
| AL021707.7            | 0.123280223 | 0.576657021 | 2.225772127  | 5.35E-17    | 1.60E-16    |
| KCNK13                | 5.168706111 | 0.823880061 | -2.649296941 | 2.35E-39    | 2.42E-37    |
| AC005281.1            | 1.762453478 | 0.262359388 | -2.747968855 | 8.05E-35    | 1.67E-33    |
| LTB4R                 | 0.519578019 | 3.04305765  | 2.550109361  | 4.49E-38    | 2.70E-36    |
| AC243829.1            | 0.027803995 | 0.295618653 | 3.410373207  | 4.57E-21    | 1.82E-20    |
| CNR1                  | 0.120202125 | 0.394957521 | 1.716235091  | 2.02E-14    | 5.09E-14    |
| CYFIP2                | 87.888915   | 18.27109236 | -2.266118327 | 5.17E-36    | 1.47E-34    |
| FZD1                  | 9.894522569 | 24.27144524 | 1.294558015  | 2.28E-25    | 1.28E-24    |
| ZNF32-AS2             | 0.396491139 | 0.935665438 | 1.23870414   | 8.30E-13    | 1.90E-12    |
| HMGA1P4               | 0.423841251 | 0.952360644 | 1.167983997  | 0.000448726 | 0.000590354 |
| SCN1B                 | 1.072960089 | 4.328219516 | 2.012177258  | 1.92E-35    | 4.66E-34    |
| ANKRD36C              | 0.100477279 | 0.357829696 | 1.832403812  | 2.54E-16    | 7.27E-16    |
| SNORA75               | 0.166460722 | 1.0910353   | 2.71244408   | 1.27E-16    | 3.70E-16    |
| TREM2                 | 1.409428622 | 23.41532467 | 4.054270721  | 4.52E-40    | 6.84E-38    |
| XBP1P1                | 0.09655031  | 0.278844265 | 1.530106798  | 1.99E-12    | 4.44E-12    |
| LILRB2                | 0.712980169 | 3.528278768 | 2.307030696  | 3.02E-35    | 6.99E-34    |
| AC132872.3            | 0.365955634 | 2.019289163 | 2.464106857  | 1.40E-21    | 5.80E-21    |

Table S1. The differentially expressed genes(DEGs) were screened out in TCGA

| ID          | conMean     | treatMean   | logFC        | pValue      | FDR         |
|-------------|-------------|-------------|--------------|-------------|-------------|
| ZDHC11      | 0.162525058 | 0.454670964 | 1.484160709  | 4.27E-07    | 6.85E-07    |
| AC027288.3  | 1.896463498 | 0.285271068 | -2.73290626  | 6.41E-20    | 2.35E-19    |
| FGF14       | 0.145720211 | 0.318787333 | 1.12939332   | 0.031064472 | 0.035611968 |
| TAS2R2P     | 0.527392786 | 0.173025386 | -1.607894113 | 2.94E-25    | 1.63E-24    |
| MYO6        | 27.24522153 | 11.78605164 | -1.208922729 | 2.18E-38    | 1.46E-36    |
| AC012186.2  | 0.147331077 | 0.460884319 | 1.645342912  | 1.54E-14    | 3.93E-14    |
| IL16        | 0.589597089 | 2.210966514 | 1.906875869  | 8.63E-32    | 9.84E-31    |
| CEACAM4     | 0.149628548 | 0.537953748 | 1.846096683  | 5.22E-21    | 2.07E-20    |
| LINC01094   | 0.277250445 | 1.963631265 | 2.824262361  | 6.62E-37    | 2.57E-35    |
| RNA5SP118   | 0.08206058  | 0.315622291 | 1.943437839  | 1.95E-06    | 3.00E-06    |
| QTRT1       | 5.345294319 | 12.21137121 | 1.191883917  | 1.33E-26    | 8.30E-26    |
| MS4A2       | 0.216930038 | 0.561876675 | 1.373023679  | 6.51E-16    | 1.81E-15    |
| LRRK1       | 0.686337219 | 2.153168658 | 1.649471832  | 1.55E-29    | 1.31E-28    |
| LYNX1       | 4.687950375 | 2.026407721 | -1.210032819 | 3.50E-26    | 2.11E-25    |
| CSF1R       | 7.452381472 | 23.2148752  | 1.639276095  | 1.55E-24    | 8.13E-24    |
| LINC00113   | 2.020253757 | 0.859227137 | -1.233425052 | 1.30E-16    | 3.78E-16    |
| RNU2-27P    | 4.004503504 | 1.416726529 | -1.499062081 | 2.50E-19    | 8.79E-19    |
| HIST2H2BE   | 14.70718447 | 6.366502967 | -1.207948043 | 9.01E-15    | 2.32E-14    |
| RPL21P119   | 0.351830885 | 0.760759171 | 1.112557686  | 4.63E-08    | 7.88E-08    |
| AC147651.1  | 5.260377449 | 11.1339188  | 1.081723241  | 3.19E-06    | 4.84E-06    |
| AGBL3       | 0.531623663 | 1.583935244 | 1.57503613   | 4.10E-26    | 2.46E-25    |
| AC134043.2  | 0.388085373 | 0.959787159 | 1.306340453  | 2.40E-20    | 9.04E-20    |
| TSPAN1      | 148.5260861 | 66.62756024 | -1.156525367 | 3.97E-21    | 1.59E-20    |
| IRF1        | 5.463305597 | 12.01400087 | 1.136870644  | 3.27E-20    | 1.22E-19    |
| AC012618.3  | 1.197002397 | 0.508110573 | -1.236211651 | 4.49E-26    | 2.69E-25    |
| EPB41L4A-A1 | 4.630928222 | 12.26937211 | 1.40568812   | 7.10E-28    | 4.97E-27    |
| FAM183A     | 0.455262274 | 1.577635122 | 1.792993756  | 1.70E-10    | 3.37E-10    |
| STMN2       | 0.045156298 | 0.641166603 | 3.827700156  | 1.31E-07    | 2.17E-07    |
| CCDC13-AS1  | 0.52312596  | 0.160503533 | -1.704553314 | 1.49E-30    | 1.43E-29    |
| RNF175      | 0.083770215 | 0.437738403 | 2.385559674  | 6.22E-32    | 7.30E-31    |
| SPTBN2      | 32.95805167 | 1.476465481 | -4.480411427 | 5.84E-40    | 8.06E-38    |
| PRKAR2B     | 7.447831625 | 1.567726298 | -2.24814675  | 3.09E-40    | 4.86E-38    |
| SFXN3       | 8.174946556 | 19.44758902 | 1.250310107  | 4.93E-34    | 8.57E-33    |
| RPL21P10    | 0.088549415 | 0.265379354 | 1.583501459  | 6.69E-12    | 1.44E-11    |
| IGHV3-41    | 0.145657728 | 0.367832543 | 1.336466871  | 0.014387    | 0.016937303 |
| ARNT2       | 16.22907947 | 4.725729053 | -1.779972351 | 4.33E-34    | 7.64E-33    |
| IGLV1-50    | 0.15383399  | 0.667502541 | 2.117399024  | 0.000311541 | 0.000414641 |
| CADM1       | 10.31925156 | 3.99332561  | -1.36967572  | 2.79E-25    | 1.55E-24    |
| AC245100.4  | 0.338447143 | 1.109618612 | 1.713061447  | 9.09E-21    | 3.54E-20    |
| IGKV1D-12   | 0.143719423 | 0.569367598 | 1.986105347  | 0.031252317 | 0.035821328 |
| FCGR2A      | 2.956442069 | 10.95811033 | 1.890065121  | 2.18E-30    | 2.04E-29    |
| AL024508.2  | 0.603267806 | 0.176453586 | -1.77350984  | 9.03E-35    | 1.85E-33    |
| MIRLET7D    | 0.779391415 | 2.252634653 | 1.531193401  | 8.97E-06    | 1.32E-05    |
| PIM2        | 4.676008986 | 11.31879483 | 1.275370747  | 6.40E-19    | 2.18E-18    |
| AL158212.2  | 0.213800664 | 0.436791174 | 1.030677369  | 0.001096527 | 0.001406211 |
| SCART1      | 0.070071317 | 0.347844668 | 2.311547278  | 8.01E-19    | 2.71E-18    |
| SPTB        | 0.891068136 | 0.146329619 | -2.606313938 | 3.19E-38    | 2.04E-36    |
| ITPR2       | 9.920941875 | 4.310921658 | -1.202480749 | 7.03E-33    | 9.77E-32    |
| B3GNT4      | 0.467202585 | 1.644622184 | 1.815636032  | 2.06E-16    | 5.90E-16    |
| IGKV1D-43   | 0.095152802 | 0.647564283 | 2.766705364  | 0.009653354 | 0.011530707 |
| GPR84       | 0.148641791 | 0.633879364 | 2.092368515  | 2.24E-21    | 9.16E-21    |
| GRPR        | 0.070903849 | 0.27461279  | 1.953462976  | 0.000110741 | 0.000151846 |
| ADAM1B      | 0.651020824 | 0.269499461 | -1.272421302 | 2.47E-30    | 2.29E-29    |
| PRSS27      | 0.124396594 | 0.283700603 | 1.189422231  | 2.41E-16    | 6.90E-16    |
| AC068888.2  | 0.066524203 | 0.282294995 | 2.085252315  | 8.44E-14    | 2.05E-13    |

Table S1. The differentially expressed genes(DEGs) were screened out in TCGA

| ID         | conMean     | treatMean   | logFC        | pValue      | FDR         |
|------------|-------------|-------------|--------------|-------------|-------------|
| AC006449.5 | 0.54046313  | 0.182564402 | -1.565790715 | 4.03E-33    | 5.89E-32    |
| IKZF3      | 0.331399566 | 2.030108258 | 2.614913046  | 1.80E-28    | 1.35E-27    |
| MIR581     | 0.065399915 | 0.539247768 | 3.043587627  | 6.00E-06    | 8.95E-06    |
| AC008991.1 | 0.032605993 | 0.525439788 | 4.010316373  | 2.99E-14    | 7.47E-14    |
| AC093063.1 | 0.006020191 | 0.445473202 | 6.209385683  | 3.70E-18    | 1.19E-17    |
| TNFRSF17   | 0.223611994 | 0.678031667 | 1.600355082  | 1.98E-07    | 3.24E-07    |
| EPHB2      | 1.353783521 | 0.657578499 | -1.041762029 | 3.37E-19    | 1.17E-18    |
| SNORA80E   | 0.135121741 | 0.809366227 | 2.582532826  | 0.00136161  | 0.001735779 |
| BCL9       | 6.666360319 | 3.256424153 | -1.033610673 | 2.11E-36    | 6.72E-35    |
| AC000068.1 | 0.584852053 | 0.184171528 | -1.667021678 | 1.63E-34    | 3.14E-33    |
| CD5L       | 0.038950162 | 1.215745921 | 4.964068607  | 2.45E-21    | 1.00E-20    |
| GZMH       | 0.977967646 | 7.902790277 | 3.01450348   | 5.56E-35    | 1.21E-33    |
| AC068790.6 | 0.07655601  | 0.303491126 | 1.987066788  | 1.74E-08    | 3.05E-08    |
| UXS1       | 19.94383839 | 7.255615106 | -1.458773266 | 1.02E-34    | 2.06E-33    |
| CRNDE      | 2.506750071 | 6.166878792 | 1.298722328  | 3.48E-17    | 1.05E-16    |
| SNCB       | 0.024548203 | 0.403611708 | 4.039278705  | 2.49E-08    | 4.31E-08    |
| RASSF4     | 6.40596505  | 21.56521928 | 1.751218554  | 1.62E-30    | 1.55E-29    |
| HIST1H2BO  | 0.051967681 | 0.356193988 | 2.776976586  | 2.87E-14    | 7.18E-14    |
| MATK       | 0.298408072 | 1.447925052 | 2.278628459  | 2.25E-34    | 4.19E-33    |
| AC145207.9 | 0.166395745 | 0.952999761 | 2.51785731   | 1.10E-19    | 3.96E-19    |
| HTATIP2    | 7.837779042 | 17.66357696 | 1.172260719  | 2.67E-32    | 3.34E-31    |
| AC110995.1 | 0.194480309 | 0.650764654 | 1.742511803  | 3.35E-21    | 1.35E-20    |
| RNU6-97P   | 0.048644199 | 0.515727471 | 3.406269233  | 3.57E-07    | 5.75E-07    |
| C19orf67   | 0.047955529 | 0.701440282 | 3.870551207  | 9.89E-28    | 6.81E-27    |
| OR7E14P    | 5.362358708 | 2.164085498 | -1.309110232 | 3.73E-31    | 3.86E-30    |
| CHTF18     | 0.475129856 | 1.394323007 | 1.553171044  | 1.48E-27    | 1.01E-26    |
| RARRES2    | 42.75623274 | 127.4521886 | 1.5757495    | 9.09E-21    | 3.54E-20    |
| LINC00160  | 0.012243723 | 0.238290277 | 4.282605866  | 6.18E-19    | 2.11E-18    |
| NR3C2      | 11.14803619 | 2.762160559 | -2.012920503 | 1.39E-37    | 6.95E-36    |
| LINC01767  | 0.04520809  | 0.235749603 | 2.382602472  | 3.41E-19    | 1.18E-18    |
| AC131009.4 | 0.054949045 | 0.278329513 | 2.340627593  | 4.10E-13    | 9.56E-13    |
| AC018665.1 | 0.661448371 | 1.69598847  | 1.358425905  | 3.62E-10    | 7.00E-10    |
| ARL10      | 0.876762    | 2.24257344  | 1.354898055  | 2.92E-21    | 1.18E-20    |
| SACS       | 0.774690667 | 1.952263719 | 1.333455687  | 2.64E-26    | 1.61E-25    |
| AP006621.4 | 0.235820988 | 1.001369746 | 2.086210744  | 3.25E-12    | 7.16E-12    |
| KRT14      | 0.100330903 | 0.316131993 | 1.655761009  | 0.00016495  | 0.000223597 |
| RPS20P31   | 0.011448385 | 0.287009666 | 4.647883342  | 3.09E-09    | 5.67E-09    |
| TMEM45A    | 0.973257596 | 8.021134611 | 3.04291272   | 3.83E-29    | 3.08E-28    |
| IGKV3D-15  | 0.737091759 | 2.109140634 | 1.516739162  | 0.002103146 | 0.002639253 |
| ACSM5      | 5.294032918 | 10.82986957 | 1.032576797  | 4.07E-11    | 8.35E-11    |
| AL161668.4 | 1.775058229 | 0.103734943 | -4.096892498 | 4.24E-39    | 3.70E-37    |
| FAAHP1     | 0.164335821 | 0.69019275  | 2.070352338  | 1.75E-13    | 4.17E-13    |
| CYP2B6     | 4.553810907 | 0.187378102 | -4.603050117 | 1.70E-36    | 5.62E-35    |
| PPP1R1B    | 1.593889782 | 0.111119008 | -3.842374342 | 5.75E-37    | 2.30E-35    |
| AC002525.1 | 0.496464388 | 0.247500021 | -1.004261586 | 2.74E-07    | 4.45E-07    |
| RDH12      | 4.006883572 | 0.99469439  | -2.010155345 | 4.97E-06    | 7.45E-06    |
| TFF1       | 1.679151313 | 0.69772493  | -1.267001953 | 4.59E-06    | 6.89E-06    |
| ZNF425     | 1.577574838 | 0.679426901 | -1.2153182   | 1.37E-35    | 3.47E-34    |
| AC022509.3 | 0.602419953 | 1.8686019   | 1.63311778   | 6.37E-24    | 3.17E-23    |
| DUXAP8     | 0.036679161 | 0.250957731 | 2.774411845  | 1.60E-27    | 1.08E-26    |
| GOLGA8N    | 0.15157701  | 0.342623556 | 1.176573391  | 1.35E-11    | 2.86E-11    |
| KLHL21     | 16.29519586 | 7.120619411 | -1.194372043 | 1.35E-20    | 5.20E-20    |
| SLC25A25   | 12.28048744 | 3.37535946  | -1.863254771 | 6.69E-35    | 1.43E-33    |
| KIF26B     | 1.40845845  | 0.572350065 | -1.29914729  | 4.96E-21    | 1.97E-20    |
| CLDN7      | 34.69009389 | 14.75621772 | -1.233200764 | 1.12E-23    | 5.45E-23    |

Table S1. The differentially expressed genes(DEGs) were screened out in TCGA

| ID         | conMean     | treatMean   | logFC        | pValue   | FDR      |
|------------|-------------|-------------|--------------|----------|----------|
| IDH2-DT    | 1.404985816 | 0.201796626 | -2.799581607 | 1.61E-38 | 1.12E-36 |
| AC007000.2 | 0.063539968 | 0.219667511 | 1.78958525   | 1.80E-07 | 2.96E-07 |
| AL390729.1 | 0.030276578 | 0.318187126 | 3.393601381  | 3.25E-31 | 3.41E-30 |
| AL807757.2 | 0.06858333  | 0.240921276 | 1.812631957  | 1.06E-08 | 1.88E-08 |
| AC019069.1 | 0.206618079 | 2.132048327 | 3.367201737  | 4.95E-37 | 2.02E-35 |
| AC093495.1 | 0.209244655 | 0.450530733 | 1.106434751  | 1.27E-12 | 2.86E-12 |
| AC037487.3 | 0.211473271 | 0.774873387 | 1.87348527   | 2.14E-10 | 4.20E-10 |
| AC080162.1 | 0.252461864 | 0.607492128 | 1.266800238  | 1.01E-11 | 2.15E-11 |
| AC119424.1 | 1.130563176 | 0.165090533 | -2.775712311 | 6.22E-27 | 3.99E-26 |
| GPRC5B     | 24.06027486 | 10.38286162 | -1.212449004 | 6.82E-32 | 7.97E-31 |
| AC245884.3 | 0.576801096 | 2.221839945 | 1.945609082  | 2.85E-16 | 8.10E-16 |
| SHROOM1    | 1.991107331 | 4.351390366 | 1.127905456  | 4.94E-24 | 2.48E-23 |
| RPL12P47   | 0.071924713 | 0.249425926 | 1.79405197   | 4.52E-05 | 6.35E-05 |
| IRF2BPL    | 23.29480036 | 8.39093805  | -1.473103958 | 1.81E-33 | 2.81E-32 |
| VAV3       | 27.17348351 | 10.44541001 | -1.379330401 | 3.61E-35 | 8.17E-34 |
| TEK        | 22.50718069 | 8.632241494 | -1.382578221 | 3.85E-32 | 4.66E-31 |
| AL592166.1 | 0.146076379 | 0.362584805 | 1.311595557  | 4.00E-23 | 1.86E-22 |
| AL162377.1 | 1.471023506 | 0.601049765 | -1.291263949 | 6.03E-34 | 1.03E-32 |
| SLC29A4    | 1.873210439 | 8.375827693 | 2.160718781  | 1.49E-27 | 1.01E-26 |
| LYL1       | 1.1346881   | 2.40287913  | 1.082468292  | 2.88E-21 | 1.17E-20 |
| RF01241    | 0.181164626 | 0.395194706 | 1.125262336  | 1.20E-07 | 2.00E-07 |
| MIR3942    | 0.182116018 | 0.504456138 | 1.469871015  | 1.87E-07 | 3.06E-07 |
| ENTPD3     | 1.0429266   | 0.111807125 | -3.221553591 | 9.12E-38 | 4.90E-36 |
| GPR15      | 0.085963491 | 0.39091357  | 2.18505369   | 4.88E-10 | 9.37E-10 |
| AL672207.1 | 0.969931827 | 0.310124963 | -1.645033692 | 1.44E-13 | 3.44E-13 |
| KRT8P33    | 0.213987491 | 0.470296191 | 1.136043182  | 1.97E-21 | 8.09E-21 |
| DCDC2      | 23.81228676 | 7.71032063  | -1.626843413 | 5.36E-30 | 4.78E-29 |
| ACLY       | 33.71824625 | 88.47434425 | 1.391729663  | 1.39E-30 | 1.33E-29 |
| AP000569.1 | 0.777144846 | 1.946962699 | 1.324969823  | 5.02E-06 | 7.53E-06 |
| RN7SKP16   | 0.403985548 | 1.262591649 | 1.644012525  | 1.05E-14 | 2.71E-14 |
| MIR4420    | 0.037886468 | 0.526033294 | 3.795399559  | 9.99E-15 | 2.57E-14 |
| PPP4R1L    | 0.604765596 | 1.289049062 | 1.0918592    | 1.82E-19 | 6.47E-19 |
| SYCE1L     | 0.597844489 | 1.72240252  | 1.52658017   | 5.92E-10 | 1.13E-09 |
| AHRR       | 0.206329636 | 0.572329816 | 1.471895713  | 2.48E-10 | 4.86E-10 |
| PLEKHG4B   | 0.858621018 | 0.191054602 | -2.168036481 | 2.72E-13 | 6.41E-13 |
| C1orf210   | 17.95728328 | 6.83541158  | -1.39346899  | 7.66E-31 | 7.62E-30 |
| PLCL1      | 16.17935939 | 2.606743224 | -2.633834103 | 7.59E-38 | 4.20E-36 |
| MSTO2P     | 0.552142124 | 1.55389077  | 1.492773518  | 7.23E-18 | 2.29E-17 |
| AL606970.1 | 1.333563238 | 0.614441763 | -1.117938056 | 1.73E-05 | 2.50E-05 |
| ENAM       | 4.079121432 | 1.221067202 | -1.740115854 | 5.21E-33 | 7.46E-32 |
| CDH2       | 8.922311486 | 21.32867839 | 1.257305154  | 2.78E-23 | 1.31E-22 |
| HSPA2      | 52.34832846 | 3.354695578 | -3.963889711 | 2.22E-40 | 3.84E-38 |
| AP3S1      | 8.510536542 | 17.38741598 | 1.03072155   | 3.89E-33 | 5.71E-32 |
| RNU6-1160P | 0.047059413 | 0.469974637 | 3.320027688  | 5.91E-14 | 1.45E-13 |
| IL18BP     | 2.916749444 | 8.354901034 | 1.518261279  | 1.23E-30 | 1.19E-29 |
| AC103810.1 | 0.090473723 | 0.281575877 | 1.637953007  | 6.52E-11 | 1.32E-10 |
| AP002812.5 | 0.068616694 | 0.360178985 | 2.39208249   | 1.68E-22 | 7.48E-22 |
| TRIM22     | 6.872980139 | 18.10588291 | 1.397450834  | 3.65E-27 | 2.39E-26 |
| NCS1       | 10.76023706 | 4.607247909 | -1.223732727 | 1.26E-30 | 1.22E-29 |
| LHX2       | 0.008705954 | 0.252054896 | 4.855591839  | 4.41E-21 | 1.76E-20 |
| CST7       | 2.115860032 | 18.83098504 | 3.15379237   | 2.68E-34 | 4.90E-33 |
| CLDN9      | 0.774206285 | 0.279125312 | -1.471805061 | 2.58E-11 | 5.37E-11 |
| MIR8058    | 0.019963806 | 0.386407229 | 4.274663422  | 2.12E-12 | 4.73E-12 |
| SCG5       | 0.694136437 | 2.055365449 | 1.566103764  | 1.16E-06 | 1.81E-06 |
| ACBD3-AS1  | 0.139406209 | 0.420900858 | 1.594185632  | 5.49E-15 | 1.44E-14 |

Table S1. The differentially expressed genes(DEGs) were screened out in TCGA

| ID          | conMean     | treatMean   | logFC        | pValue      | FDR         |
|-------------|-------------|-------------|--------------|-------------|-------------|
| AC092171.4  | 0.198323965 | 0.710168814 | 1.84030299   | 3.82E-11    | 7.86E-11    |
| ADM         | 12.07183515 | 80.42273438 | 2.735958378  | 4.95E-37    | 2.02E-35    |
| AL365356.5  | 0.079285061 | 0.308751319 | 1.961324344  | 2.32E-16    | 6.65E-16    |
| NAP1L3      | 2.718359639 | 1.118912351 | -1.280639309 | 5.23E-30    | 4.67E-29    |
| ARRDC2      | 4.970225778 | 20.02854001 | 2.010673965  | 1.89E-34    | 3.59E-33    |
| ABLIM3      | 4.395845149 | 18.01005537 | 2.034590146  | 2.13E-29    | 1.76E-28    |
| TGFA        | 10.33891817 | 32.95195043 | 1.672278627  | 4.01E-25    | 2.21E-24    |
| AC005264.1  | 0.014622459 | 0.237162394 | 4.019617426  | 1.96E-35    | 4.74E-34    |
| SNORD101    | 0.597122204 | 1.42197577  | 1.25179876   | 1.06E-06    | 1.66E-06    |
| CX3CR1      | 2.027509138 | 6.70631854  | 1.725812594  | 1.66E-17    | 5.13E-17    |
| RAB29       | 26.46742503 | 12.50887588 | -1.081265698 | 2.00E-22    | 8.80E-22    |
| C1QC        | 25.38847476 | 173.9455879 | 2.776390454  | 1.61E-34    | 3.11E-33    |
| RASD1       | 123.4203774 | 20.70849255 | -2.575286168 | 7.31E-37    | 2.80E-35    |
| BTG2        | 193.3563436 | 44.83398722 | -2.108597384 | 3.05E-30    | 2.81E-29    |
| MIR3685     | 1.690418329 | 4.455604915 | 1.398240997  | 3.90E-12    | 8.54E-12    |
| PRKY        | 0.297945313 | 0.813703267 | 1.449455229  | 0.007704262 | 0.009271414 |
| CACNA1C-A'  | 0.112867605 | 0.314416194 | 1.478044056  | 7.51E-19    | 2.55E-18    |
| PXDC1       | 11.83476299 | 26.83896298 | 1.181298115  | 1.61E-28    | 1.21E-27    |
| ANXA2R      | 0.471497819 | 1.925064552 | 2.029583819  | 8.55E-33    | 1.17E-31    |
| PGGHG       | 2.031994943 | 24.24549482 | 3.576747981  | 3.89E-29    | 3.13E-28    |
| AC012409.1  | 2.697267542 | 1.278088186 | -1.077511246 | 1.20E-18    | 4.01E-18    |
| AP001267.3  | 0.858788686 | 0.394296715 | -1.123021495 | 1.07E-28    | 8.16E-28    |
| LINC01606   | 2.060511101 | 0.214272976 | -3.265480419 | 7.24E-42    | 2.76E-39    |
| GPC5        | 4.265916853 | 0.074618444 | -5.837179765 | 5.28E-43    | 2.94E-40    |
| IFNGR2      | 18.42842153 | 39.67874578 | 1.10643392   | 8.05E-35    | 1.67E-33    |
| AC104984.4  | 3.682573955 | 0.462925451 | -2.99186271  | 3.54E-38    | 2.23E-36    |
| CSF2RB      | 1.354506286 | 3.549222509 | 1.389735934  | 3.25E-23    | 1.53E-22    |
| NLRP2       | 1.264827701 | 0.395416881 | -1.677494501 | 7.00E-21    | 2.75E-20    |
| AC010245.2  | 0.416246463 | 0.93672544  | 1.170188232  | 3.39E-23    | 1.59E-22    |
| AC005776.2  | 0.069657548 | 0.330542771 | 2.246485364  | 2.49E-20    | 9.36E-20    |
| FABP6       | 0.390912925 | 19.45977802 | 5.637504156  | 1.50E-38    | 1.05E-36    |
| BMP7        | 3.334839914 | 0.378357432 | -3.139795818 | 1.94E-37    | 9.23E-36    |
| LAIR2       | 0.048505092 | 0.790285676 | 4.026166139  | 6.80E-29    | 5.34E-28    |
| SLC13A4     | 0.093340113 | 0.239749801 | 1.360960507  | 1.80E-09    | 3.36E-09    |
| AC104966.1  | 0.067775142 | 0.703967032 | 3.376679731  | 6.35E-24    | 3.16E-23    |
| AC087301.1  | 0.131414892 | 0.425057155 | 1.693528074  | 5.88E-09    | 1.06E-08    |
| AC015911.1  | 0.074056732 | 0.228242682 | 1.623865806  | 0.000131577 | 0.000179659 |
| IL15RA      | 2.055387417 | 5.678963155 | 1.466217201  | 4.48E-30    | 4.03E-29    |
| C17orf53    | 0.259770076 | 0.757906064 | 1.544783801  | 1.04E-32    | 1.41E-31    |
| MRGPRF      | 5.654163    | 1.223246113 | -2.208598776 | 7.92E-33    | 1.09E-31    |
| AC093001.1  | 0.011143787 | 0.965969566 | 6.437666232  | 2.11E-10    | 4.15E-10    |
| AC113383.1  | 0.342325802 | 0.799473533 | 1.223680236  | 1.53E-06    | 2.36E-06    |
| AC015911.8  | 0.118244872 | 0.948182238 | 3.003386754  | 2.69E-28    | 1.98E-27    |
| SNHG17      | 1.621331265 | 3.353464144 | 1.048473289  | 5.03E-21    | 2.00E-20    |
| RNU6-1278P  | 0.041532471 | 0.254458618 | 2.615119447  | 1.16E-08    | 2.06E-08    |
| REEP4       | 3.077310931 | 6.712879508 | 1.125261527  | 3.90E-30    | 3.55E-29    |
| HASPIN      | 0.085646454 | 0.28481299  | 1.733549527  | 1.96E-28    | 1.46E-27    |
| COL26A1     | 4.210523056 | 0.156993271 | -4.745224834 | 2.74E-39    | 2.70E-37    |
| STAT4       | 0.389246365 | 1.453216963 | 1.900494638  | 1.72E-32    | 2.24E-31    |
| STX16-NPEP1 | 0.07910886  | 0.336039759 | 2.086720745  | 8.26E-17    | 2.43E-16    |
| TMIGD3      | 0.498164241 | 3.882011731 | 2.962111105  | 1.11E-36    | 3.97E-35    |
| AC048341.2  | 0.78654094  | 2.522626732 | 1.681332983  | 1.06E-11    | 2.26E-11    |
| AL390728.6  | 2.31611475  | 6.033090978 | 1.381190606  | 3.64E-22    | 1.58E-21    |
| MCCC1       | 16.67542453 | 8.025507583 | -1.055058945 | 4.19E-31    | 4.31E-30    |
| LINC02499   | 1.062363146 | 0.093727066 | -3.50266747  | 1.53E-13    | 3.66E-13    |

Table S1. The differentially expressed genes(DEGs) were screened out in TCGA

| ID         | conMean     | treatMean   | logFC        | pValue      | FDR         |
|------------|-------------|-------------|--------------|-------------|-------------|
| SRL        | 1.448605024 | 0.393006492 | -1.882039235 | 8.67E-30    | 7.50E-29    |
| SLFN12L    | 0.085869018 | 0.590092278 | 2.780730987  | 8.39E-31    | 8.30E-30    |
| NCF1C      | 0.360334308 | 1.750387695 | 2.280266577  | 9.19E-31    | 9.04E-30    |
| APOL2      | 11.78700781 | 30.35294725 | 1.364639079  | 4.11E-32    | 4.97E-31    |
| TSPAN4     | 7.397576917 | 17.02767571 | 1.202756822  | 6.56E-33    | 9.19E-32    |
| SEMA6A     | 2.831858922 | 10.95869285 | 1.952254424  | 2.56E-29    | 2.11E-28    |
| CLDN19     | 32.00252953 | 0.627481467 | -5.672469283 | 2.32E-41    | 6.92E-39    |
| IGHV3-49   | 3.019982567 | 17.28818116 | 2.517173969  | 6.01E-06    | 8.96E-06    |
| GNG7       | 8.1336065   | 3.088619511 | -1.39693304  | 1.68E-32    | 2.20E-31    |
| AC108727.1 | 0.202179873 | 0.470956516 | 1.219954477  | 5.45E-07    | 8.69E-07    |
| U73169.1   | 0.058882449 | 0.285203073 | 2.276079934  | 4.15E-15    | 1.09E-14    |
| ZNF26      | 0.403563214 | 0.814042617 | 1.012309652  | 1.00E-22    | 4.54E-22    |
| CRYBB2     | 0.091891097 | 0.315006788 | 1.77738592   | 8.84E-19    | 2.98E-18    |
| RNU6-1048P | 0.287291072 | 0.902975745 | 1.652174075  | 3.70E-12    | 8.12E-12    |
| LCN1       | 0.004005765 | 0.39145799  | 6.610636044  | 9.49E-23    | 4.30E-22    |
| MIR4697HG  | 0.330250903 | 0.700477594 | 1.084776398  | 8.21E-05    | 0.000113411 |
| LINC02521  | 0.030766358 | 0.227647061 | 2.887373252  | 2.97E-29    | 2.43E-28    |
| TMPRSS13   | 0.579745579 | 0.172266754 | -1.750775613 | 0.000337109 | 0.000447306 |
| KLRB1      | 1.471052933 | 4.314373181 | 1.552301811  | 7.10E-23    | 3.25E-22    |
| CAPN8      | 0.652763759 | 0.231308873 | -1.496740354 | 2.46E-17    | 7.51E-17    |
| IGLV4-60   | 0.986003858 | 7.428199202 | 2.913347308  | 0.000295687 | 0.000394199 |
| GAPDHP72   | 0.112608161 | 0.267646092 | 1.249015198  | 8.93E-17    | 2.63E-16    |
| PPIAP45    | 0.039650163 | 0.468260028 | 3.561911182  | 1.17E-13    | 2.81E-13    |
| AC020779.2 | 1.299145707 | 0.313116204 | -2.05279317  | 5.32E-27    | 3.43E-26    |
| AL031123.3 | 0.686247687 | 0.160048114 | -2.100223702 | 2.40E-33    | 3.64E-32    |
| NGF        | 1.724507074 | 7.614480068 | 2.142561483  | 7.05E-25    | 3.80E-24    |
| LINC00926  | 0.143547305 | 0.576711203 | 2.006322805  | 2.77E-22    | 1.21E-21    |
| DPY19L1P1  | 0.587988553 | 1.280747853 | 1.123126499  | 3.18E-18    | 1.03E-17    |
| CYP3A5     | 1.208858242 | 5.412248331 | 2.162582961  | 1.17E-21    | 4.87E-21    |
| SCNN1D     | 0.205090881 | 1.118036754 | 2.446632362  | 1.79E-20    | 6.84E-20    |
| LGALS3     | 40.40707125 | 98.89604017 | 1.291304969  | 1.07E-16    | 3.13E-16    |
| RPS12P26   | 0.250946852 | 0.57096358  | 1.186016877  | 2.22E-11    | 4.64E-11    |
| RN7SKP150  | 0.130307209 | 0.532791252 | 2.031653492  | 5.65E-15    | 1.48E-14    |
| LINC01714  | 0.190397275 | 0.573805656 | 1.591549355  | 1.37E-11    | 2.90E-11    |
| AC007906.2 | 25.22155967 | 1.575783928 | -4.000515862 | 3.09E-39    | 2.92E-37    |
| FGG        | 4.807253771 | 32.03921351 | 2.736553864  | 2.60E-05    | 3.72E-05    |
| CAV1       | 14.6949154  | 67.82712973 | 2.206545389  | 5.37E-35    | 1.17E-33    |
| CBLN1      | 0.100580264 | 0.436741893 | 2.118433682  | 0.000583109 | 0.000761452 |
| SLC22A12   | 60.82427463 | 15.81901693 | -1.942987264 | 5.00E-10    | 9.59E-10    |
| ELFN1      | 3.560235581 | 1.768097686 | -1.009774723 | 4.29E-14    | 1.06E-13    |
| AL162586.1 | 0.582168761 | 1.360771309 | 1.224915296  | 1.08E-09    | 2.03E-09    |
| RASGRP3    | 2.125646417 | 4.549844282 | 1.097915533  | 1.03E-25    | 5.97E-25    |
| KLHL6-AS1  | 0.429875629 | 1.067467862 | 1.312201408  | 1.53E-06    | 2.37E-06    |
| SLC19A2    | 9.186015076 | 4.131322657 | -1.152835412 | 1.70E-29    | 1.43E-28    |
| AC092681.1 | 0.421549465 | 0.888384906 | 1.075482952  | 1.02E-10    | 2.04E-10    |
| AL078587.1 | 0.073165646 | 0.277954854 | 1.925612263  | 6.17E-10    | 1.18E-09    |
| AL162171.1 | 2.443813018 | 0.76742304  | -1.671039922 | 9.84E-29    | 7.57E-28    |
| AC097504.2 | 0.646768563 | 0.254349588 | -1.3464368   | 5.17E-27    | 3.35E-26    |
| LINC00472  | 4.818639603 | 1.329253511 | -1.858009626 | 2.14E-35    | 5.13E-34    |
| AC105105.3 | 0.027002818 | 0.318164884 | 3.558592716  | 1.40E-24    | 7.40E-24    |
| AFMID      | 15.65068176 | 7.680142191 | -1.027020578 | 9.13E-26    | 5.32E-25    |
| GAS6-DT    | 2.265056582 | 0.900256654 | -1.331138827 | 8.73E-25    | 4.67E-24    |
| SOSTDC1    | 15.92105641 | 2.23066456  | -2.835390579 | 9.17E-37    | 3.43E-35    |
| RNU6-610P  | 0.184218368 | 0.705299338 | 1.936818768  | 1.10E-10    | 2.20E-10    |
| FGFBP2     | 0.560145814 | 2.112985156 | 1.915408297  | 1.00E-22    | 4.54E-22    |

Table S1. The differentially expressed genes(DEGs) were screened out in TCGA

| ID         | conMean     | treatMean   | logFC        | pValue      | FDR         |
|------------|-------------|-------------|--------------|-------------|-------------|
| AC138207.4 | 0.65609839  | 1.428084035 | 1.12209679   | 3.91E-17    | 1.18E-16    |
| XK         | 0.965144899 | 0.257089546 | -1.908474607 | 6.38E-32    | 7.48E-31    |
| GGT8P      | 0.301965661 | 1.791896263 | 2.569030716  | 1.93E-20    | 7.34E-20    |
| AC092301.1 | 0.06719418  | 0.241983787 | 1.848502211  | 3.75E-15    | 9.93E-15    |
| AC009041.2 | 0.184570915 | 0.634588221 | 1.781645514  | 0.002127931 | 0.002669379 |
| MS4A4E     | 0.081544727 | 0.773823091 | 3.24634029   | 4.90E-31    | 4.99E-30    |
| TM6SF1     | 1.025916514 | 2.093374738 | 1.02891726   | 2.85E-13    | 6.71E-13    |
| AC069528.2 | 0.442256324 | 0.980710235 | 1.148944163  | 4.30E-16    | 1.21E-15    |
| AHSA2P     | 1.340136279 | 5.993290927 | 2.160968691  | 1.88E-25    | 1.06E-24    |
| PP7080     | 48.5093381  | 8.981723355 | -2.433198303 | 7.00E-32    | 8.15E-31    |
| MSR1       | 1.976159253 | 8.485425345 | 2.102287765  | 9.49E-28    | 6.54E-27    |
| AC008740.1 | 0.056313335 | 0.302825295 | 2.426937224  | 5.84E-13    | 1.35E-12    |
| LINC01543  | 6.51959216  | 0.063067521 | -6.691740678 | 3.21E-39    | 3.02E-37    |
| TRBV6-5    | 0.180384492 | 1.651042643 | 3.194230164  | 1.19E-23    | 5.80E-23    |
| SNORA11    | 0.460773097 | 1.487719417 | 1.690974071  | 3.53E-06    | 5.35E-06    |
| AL020997.2 | 0.09257984  | 0.327903317 | 1.824500519  | 0.002620063 | 0.003263863 |
| CTXND1     | 1.876877788 | 0.446013579 | -2.073175174 | 1.91E-30    | 1.81E-29    |
| CLDN11     | 2.237101722 | 0.395328977 | -2.500505246 | 5.48E-32    | 6.49E-31    |
| AC091185.1 | 0.171909205 | 0.846735722 | 2.30026496   | 7.20E-24    | 3.55E-23    |
| DIRC3      | 0.148503618 | 0.480643752 | 1.694469902  | 5.26E-17    | 1.57E-16    |
| EGFL7      | 12.60895651 | 28.23157113 | 1.162860533  | 1.43E-13    | 3.42E-13    |
| FAM229A    | 0.437422    | 0.98307228  | 1.168271711  | 1.12E-07    | 1.87E-07    |
| FGD5-AS1   | 45.0959475  | 20.72309911 | -1.121758021 | 2.81E-37    | 1.26E-35    |
| SMIM10     | 4.311140625 | 8.940358961 | 1.052263135  | 3.78E-21    | 1.52E-20    |
| SIGLEC22P  | 0.064944098 | 0.249275523 | 1.940470895  | 2.13E-19    | 7.51E-19    |
| LINC00482  | 0.270330208 | 0.674345988 | 1.318766255  | 0.000133891 | 0.000182722 |
| CA10       | 3.692737373 | 0.116661506 | -4.984290152 | 8.91E-42    | 3.16E-39    |
| TTYH3      | 11.75810811 | 46.1347723  | 1.972198588  | 2.26E-32    | 2.87E-31    |
| CALM2P2    | 0.513299054 | 1.435009617 | 1.4831889    | 3.87E-16    | 1.09E-15    |
| TMEM30B    | 16.97602308 | 2.146878929 | -2.983185783 | 2.64E-36    | 8.13E-35    |
| GOLGA8B    | 0.635754207 | 2.620307422 | 2.043195074  | 5.06E-13    | 1.17E-12    |
| GOT2       | 55.53744931 | 25.76515548 | -1.108039621 | 5.42E-35    | 1.18E-33    |
| AGMAT      | 68.35658834 | 13.51153143 | -2.338889192 | 5.88E-08    | 9.95E-08    |
| AP000786.1 | 0.150443752 | 0.378929197 | 1.332704109  | 2.95E-07    | 4.77E-07    |
| AC009087.1 | 0.079819463 | 0.221357744 | 1.47156737   | 7.38E-09    | 1.32E-08    |
| SAMD3      | 0.082423135 | 0.433972173 | 2.396481297  | 8.06E-33    | 1.11E-31    |
| CHFR       | 0.655053721 | 1.440495051 | 1.136879572  | 5.46E-35    | 1.19E-33    |
| TMEM213    | 69.45706511 | 7.87924815  | -3.139991574 | 1.31E-36    | 4.58E-35    |
| RHEBP2     | 0.556261535 | 0.245103682 | -1.18237119  | 1.85E-12    | 4.14E-12    |
| ADGRL4     | 15.22727414 | 30.97867482 | 1.024617725  | 2.04E-14    | 5.15E-14    |
| ANO5       | 2.884860404 | 0.697612012 | -2.048004723 | 9.30E-34    | 1.54E-32    |
| AL080317.2 | 0.18743386  | 0.589897072 | 1.65408165   | 4.83E-15    | 1.27E-14    |
| MYO10      | 10.53886717 | 4.8397286   | -1.122721746 | 2.44E-29    | 2.01E-28    |
| AC009336.1 | 0.459099329 | 0.211975598 | -1.11490813  | 1.86E-17    | 5.71E-17    |
| NRP1       | 19.33172615 | 41.3433067  | 1.096683319  | 1.34E-21    | 5.57E-21    |
| OXCT1      | 31.02574981 | 12.88907579 | -1.267317258 | 4.91E-33    | 7.05E-32    |
| PROS1      | 16.68525179 | 37.34381309 | 1.162295787  | 2.36E-19    | 8.32E-19    |
| AL445991.1 | 0.094638441 | 0.216689734 | 1.195132583  | 2.19E-06    | 3.36E-06    |
| CLECL1     | 0.115265646 | 0.580856705 | 2.333219711  | 7.76E-27    | 4.94E-26    |
| AC011411.1 | 0.037638989 | 0.337060441 | 3.16270752   | 1.12E-27    | 7.67E-27    |
| AC106795.2 | 0.507669308 | 0.180153648 | -1.494661178 | 1.29E-11    | 2.73E-11    |
| AC069257.2 | 0.18276953  | 0.416919546 | 1.189743435  | 4.51E-05    | 6.35E-05    |
| SLC5A2     | 8.089921186 | 0.329811965 | -4.616410003 | 1.19E-19    | 4.29E-19    |
| POLR2J3    | 0.177234375 | 0.356859782 | 1.009698876  | 2.73E-15    | 7.31E-15    |
| GPX1P1     | 0.428772665 | 0.884323793 | 1.044361772  | 3.65E-06    | 5.51E-06    |

Table S1. The differentially expressed genes(DEGs) were screened out in TCGA

| ID         | conMean     | treatMean   | logFC        | pValue      | FDR         |
|------------|-------------|-------------|--------------|-------------|-------------|
| RPL37      | 37.75943    | 75.98261772 | 1.008832429  | 1.36E-31    | 1.50E-30    |
| SFRP1      | 99.57998058 | 2.681934537 | -5.214509806 | 1.10E-40    | 2.35E-38    |
| CFLAR-AS1  | 0.078687864 | 0.562187093 | 2.83683728   | 7.19E-27    | 4.59E-26    |
| AC073174.1 | 2.555823851 | 0.995639231 | -1.360093425 | 1.32E-07    | 2.18E-07    |
| SNORA31    | 0.548961778 | 2.763544343 | 2.331742154  | 8.60E-16    | 2.37E-15    |
| COL4A6     | 2.555318328 | 0.127328038 | -4.326880983 | 1.11E-40    | 2.35E-38    |
| AC007114.1 | 4.509993963 | 1.88359235  | -1.259638734 | 6.96E-30    | 6.12E-29    |
| UGT2A1     | 1.680503923 | 0.072063182 | -4.543487739 | 2.89E-27    | 1.92E-26    |
| KIF18B     | 0.106537277 | 0.703703389 | 2.723609142  | 8.05E-35    | 1.67E-33    |
| RNU6-1011P | 0.126873626 | 0.511155543 | 2.010370162  | 3.24E-15    | 8.62E-15    |
| GABARAPL1  | 84.36010986 | 28.69902076 | -1.555559462 | 3.00E-37    | 1.33E-35    |
| AC007038.1 | 0.221807149 | 0.624189924 | 1.492679206  | 6.21E-14    | 1.52E-13    |
| MSS51      | 0.217666512 | 0.622219774 | 1.515304779  | 2.93E-15    | 7.81E-15    |
| MYOSLID    | 0.086680165 | 0.292671303 | 1.755507491  | 2.04E-15    | 5.50E-15    |
| PCK1       | 149.2913056 | 22.33713424 | -2.740614137 | 3.76E-19    | 1.30E-18    |
| CYTL1      | 0.620975596 | 1.974365518 | 1.668780626  | 1.38E-15    | 3.77E-15    |
| RIT1       | 9.737691042 | 21.42323593 | 1.13752478   | 6.34E-29    | 5.00E-28    |
| RNA5SP268  | 0.068886808 | 0.26795282  | 1.959679361  | 0.00027885  | 0.000372331 |
| CDK3       | 0.06523874  | 0.357515974 | 2.454206888  | 1.70E-22    | 7.53E-22    |
| AL049840.4 | 3.189331681 | 6.913197302 | 1.116098959  | 3.82E-22    | 1.65E-21    |
| ZNF676     | 0.781153727 | 0.340394534 | -1.198398623 | 8.99E-25    | 4.81E-24    |
| AFF3       | 0.633669914 | 1.781880415 | 1.491597094  | 5.42E-17    | 1.62E-16    |
| RHOXF1     | 0.137017054 | 0.447243591 | 1.706705335  | 1.04E-10    | 2.09E-10    |
| TEDC2      | 0.215685665 | 0.432510506 | 1.003804887  | 1.57E-11    | 3.32E-11    |
| DACT2      | 1.428570785 | 0.620313304 | -1.20350355  | 2.17E-20    | 8.21E-20    |
| MIR3682    | 1.249310669 | 2.604344735 | 1.059788149  | 1.29E-06    | 2.00E-06    |
| AP002884.1 | 0.432109079 | 2.446632403 | 2.501329909  | 2.13E-33    | 3.26E-32    |
| GNLY       | 0.490162003 | 4.338098701 | 3.145732321  | 4.28E-37    | 1.79E-35    |
| LINC01234  | 0.038619992 | 0.504905611 | 3.708593934  | 6.98E-17    | 2.07E-16    |
| AL355338.1 | 5.936277153 | 2.443675706 | -1.280505609 | 2.04E-32    | 2.61E-31    |
| INO80B     | 1.118413067 | 2.379996801 | 1.089506513  | 1.73E-24    | 9.02E-24    |
| TPSD1      | 0.250199256 | 0.643603476 | 1.363094618  | 8.54E-09    | 1.53E-08    |
| AL928654.4 | 0.216114068 | 0.485244939 | 1.16692018   | 3.78E-24    | 1.91E-23    |
| EZH2       | 0.504125022 | 1.857130958 | 1.881222083  | 4.69E-36    | 1.34E-34    |
| SPATA17    | 0.782042833 | 0.362412883 | -1.109613384 | 1.10E-25    | 6.38E-25    |
| AC126773.1 | 0.049273107 | 0.237396165 | 2.268424285  | 2.93E-08    | 5.05E-08    |
| CES4A      | 0.604520013 | 7.942975039 | 3.715817464  | 1.76E-34    | 3.36E-33    |
| AC011933.1 | 0.069031232 | 0.27919662  | 2.015960346  | 4.27E-19    | 1.47E-18    |
| LINC02100  | 0.063519158 | 0.873416948 | 3.781406821  | 1.55E-23    | 7.47E-23    |
| WFDC10B    | 0.018047441 | 0.232847369 | 3.689518393  | 2.86E-12    | 6.33E-12    |
| CORO1C     | 12.86157771 | 27.06598174 | 1.073413092  | 1.04E-29    | 9.00E-29    |
| CATSPER3   | 0.374226772 | 0.779965712 | 1.059497931  | 4.32E-16    | 1.22E-15    |
| IL22RA1    | 0.865452788 | 2.586410077 | 1.579424009  | 1.95E-15    | 5.26E-15    |
| AMH        | 0.060116315 | 0.39390047  | 2.712002652  | 5.55E-17    | 1.65E-16    |
| COL11A2    | 0.12661353  | 0.289906598 | 1.19515659   | 5.32E-09    | 9.61E-09    |
| MMP11      | 0.922479864 | 3.658903457 | 1.987822025  | 1.11E-29    | 9.58E-29    |
| LRMP       | 1.988999953 | 4.940085501 | 1.31249277   | 1.14E-17    | 3.55E-17    |
| AC012170.2 | 0.338887017 | 0.771023781 | 1.185970992  | 5.77E-09    | 1.04E-08    |
| SLC7A9     | 16.0912293  | 6.584554066 | -1.289116903 | 0.015371292 | 0.018047571 |
| IL4I1      | 1.567318124 | 6.66819712  | 2.088998715  | 2.42E-27    | 1.61E-26    |
| AP001033.1 | 0.99297916  | 0.249925188 | -1.990267134 | 1.63E-35    | 4.04E-34    |
| BUB1       | 0.248782564 | 1.069230272 | 2.103615307  | 3.99E-33    | 5.84E-32    |
| AC009951.1 | 0.010020769 | 0.232969802 | 4.53907783   | 5.67E-30    | 5.04E-29    |
| RGL4       | 0.096268601 | 0.375564126 | 1.963922034  | 7.93E-30    | 6.89E-29    |
| TAP1       | 9.824433889 | 37.89533981 | 1.947574261  | 5.31E-39    | 4.45E-37    |



Table S1. The differentially expressed genes(DEGs) were screened out in TCGA

| ID         | conMean     | treatMean   | logFC        | pValue   | FDR      |
|------------|-------------|-------------|--------------|----------|----------|
| IGKV1D-8   | 0.557545693 | 1.837839128 | 1.720848539  | 5.76E-06 | 8.60E-06 |
| IL32       | 21.53573967 | 83.82719765 | 1.960685526  | 2.32E-28 | 1.71E-27 |
| DANCR      | 19.82004889 | 5.901720696 | -1.74775297  | 6.43E-38 | 3.64E-36 |
| GPX2       | 1.981453477 | 0.833502518 | -1.249300632 | 4.76E-28 | 3.39E-27 |
| LNX1       | 7.000729417 | 2.436167202 | -1.522892093 | 3.59E-32 | 4.38E-31 |
| AC093162.2 | 0.473383946 | 1.429102835 | 1.594027046  | 1.83E-18 | 6.02E-18 |
| CA1        | 0.064220997 | 0.365426958 | 2.508466096  | 1.77E-08 | 3.10E-08 |
| AC099535.1 | 0.107050883 | 0.3676388   | 1.779992343  | 2.25E-10 | 4.41E-10 |
| DLEU2      | 0.300367226 | 0.752263636 | 1.324510946  | 8.57E-28 | 5.94E-27 |
| AP003392.2 | 0.848771507 | 3.005051687 | 1.823941675  | 1.78E-15 | 4.82E-15 |
| CABYR      | 0.166246082 | 0.468725657 | 1.495423424  | 1.06E-23 | 5.16E-23 |
| AL158834.2 | 0.063918798 | 0.280866533 | 2.135572532  | 4.32E-22 | 1.86E-21 |
| PFKP       | 28.33611743 | 110.7615584 | 1.966743257  | 2.81E-33 | 4.20E-32 |
| AC109583.2 | 1.348084036 | 0.621200352 | -1.11777988  | 4.19E-19 | 1.45E-18 |
| AC012065.3 | 0.690362021 | 1.770718193 | 1.358909623  | 3.91E-09 | 7.12E-09 |
| ATP5PB5    | 2.554570235 | 1.001515944 | -1.350895212 | 9.89E-33 | 1.35E-31 |
| RGS20      | 0.049943709 | 0.262410345 | 2.393449724  | 8.21E-19 | 2.77E-18 |
| IL24       | 0.398831635 | 0.874172873 | 1.132138761  | 6.65E-19 | 2.26E-18 |
| LPAR6      | 5.298160875 | 12.60508219 | 1.250441969  | 6.71E-23 | 3.08E-22 |
| MALAT1     | 15.83500685 | 71.62380438 | 2.17732166   | 3.77E-10 | 7.29E-10 |
| AQP3       | 181.3012126 | 38.36542064 | -2.240510097 | 1.11E-34 | 2.23E-33 |
| INHBB      | 1.785995579 | 25.1763071  | 3.817266267  | 5.40E-38 | 3.17E-36 |
| RNU6-1099P | 0.241185069 | 0.782082548 | 1.697180295  | 8.89E-11 | 1.79E-10 |
| APOLD1     | 9.551160456 | 38.6446188  | 2.016519601  | 3.21E-20 | 1.20E-19 |
| CD3D       | 1.618134958 | 12.11799203 | 2.904746818  | 4.82E-30 | 4.33E-29 |
| GMPR       | 18.9570153  | 3.60522437  | -2.394570883 | 3.39E-35 | 7.72E-34 |
| CD160      | 0.097055096 | 0.368600621 | 1.925182628  | 2.67E-32 | 3.34E-31 |
| SPI1       | 3.241952369 | 16.63906764 | 2.359639795  | 1.76E-35 | 4.33E-34 |
| WNT11      | 1.353755155 | 0.465916315 | -1.538824076 | 1.14E-18 | 3.82E-18 |
| AL031846.2 | 0.165472565 | 0.609876724 | 1.88192562   | 2.26E-19 | 7.96E-19 |
| SCD5       | 30.30366839 | 9.379611275 | -1.69189241  | 2.98E-31 | 3.13E-30 |
| AF186192.2 | 1.21758524  | 0.421162667 | -1.531573313 | 2.55E-30 | 2.37E-29 |
| ZNF248     | 1.897117433 | 3.803699527 | 1.0035943    | 4.71E-23 | 2.18E-22 |
| TMPRSS11C  | 0.06110075  | 0.259198268 | 2.084794075  | 5.12E-13 | 1.19E-12 |
| FAM19A5    | 0.619465019 | 1.696229581 | 1.453236728  | 7.27E-11 | 1.47E-10 |
| P4HA2      | 5.700932    | 14.17300312 | 1.313875785  | 6.12E-25 | 3.32E-24 |
| CLEC18B    | 2.434091234 | 8.341671672 | 1.776953285  | 3.02E-11 | 6.25E-11 |
| AC004930.1 | 0.025189392 | 0.316404311 | 3.650881045  | 6.34E-13 | 1.46E-12 |
| FTH1P4     | 0.166639783 | 0.406865732 | 1.287819915  | 4.87E-12 | 1.06E-11 |
| AL121761.1 | 0.388079228 | 0.179796497 | -1.109986297 | 4.47E-19 | 1.54E-18 |
| DNASE2B    | 0.037669388 | 0.283850006 | 2.913664269  | 4.36E-20 | 1.62E-19 |
| PAPPA      | 4.588428132 | 0.526282964 | -3.12408941  | 1.67E-38 | 1.16E-36 |
| AC026333.4 | 0.077933936 | 0.257530006 | 1.724416956  | 7.47E-15 | 1.94E-14 |
| CHRD1      | 7.544807333 | 2.171027519 | -1.797106047 | 9.32E-29 | 7.20E-28 |
| IGFBP3     | 50.72550458 | 562.2928074 | 3.470538377  | 2.16E-35 | 5.17E-34 |
| AC097658.1 | 0.16121303  | 0.480004161 | 1.574078555  | 1.94E-20 | 7.40E-20 |
| CD38       | 0.36920732  | 1.385397938 | 1.907797369  | 7.46E-18 | 2.35E-17 |
| KLHL6      | 0.219051042 | 1.392989421 | 2.668845319  | 1.07E-35 | 2.79E-34 |
| CD4        | 6.587828292 | 23.21248573 | 1.817026166  | 2.33E-30 | 2.17E-29 |
| RPL32P1    | 0.102028774 | 0.723311807 | 2.825641621  | 1.46E-21 | 6.05E-21 |
| AL355388.2 | 0.092308192 | 0.315543922 | 1.77331024   | 8.94E-14 | 2.16E-13 |
| ASB9P1     | 0.098385201 | 0.384565615 | 1.966716551  | 4.85E-13 | 1.13E-12 |
| PTPRO      | 11.84453077 | 1.362434221 | -3.119962564 | 2.77E-08 | 4.79E-08 |
| CNKSR1     | 2.830565743 | 0.468329354 | -2.59549506  | 7.64E-35 | 1.60E-33 |
| HACD3      | 33.5541705  | 12.20431418 | -1.459100867 | 1.71E-36 | 5.65E-35 |

Table S1. The differentially expressed genes(DEGs) were screened out in TCGA

| ID         | conMean     | treatMean   | logFC        | pValue      | FDR         |
|------------|-------------|-------------|--------------|-------------|-------------|
| IL10RA     | 1.7733518   | 8.547340509 | 2.268996829  | 1.42E-31    | 1.56E-30    |
| AC010536.2 | 0.082191889 | 0.518917916 | 2.658438417  | 1.15E-11    | 2.45E-11    |
| AL590560.1 | 0.511989417 | 1.731293808 | 1.757664681  | 1.08E-10    | 2.16E-10    |
| AC024145.1 | 0.14571822  | 0.535562285 | 1.877873091  | 1.25E-14    | 3.20E-14    |
| IGKV1-9    | 6.249610452 | 34.40638203 | 2.460838023  | 3.77E-05    | 5.33E-05    |
| SFRP2      | 6.892486494 | 26.20857179 | 1.926942297  | 0.018758414 | 0.021895806 |
| RARRES3    | 34.38991556 | 80.1438001  | 1.220605345  | 1.57E-15    | 4.26E-15    |
| LINC02019  | 0.149048483 | 0.35662173  | 1.258612918  | 4.05E-17    | 1.22E-16    |
| ZNF503     | 9.434193916 | 2.475242842 | -1.930329183 | 3.26E-37    | 1.42E-35    |
| KCNJ14     | 0.164486031 | 0.415851364 | 1.338102899  | 2.46E-23    | 1.17E-22    |
| FILIP1     | 0.974215339 | 2.606160067 | 1.419613092  | 5.37E-20    | 1.98E-19    |
| AC023154.1 | 1.457783421 | 0.036428063 | -5.322582286 | 2.12E-31    | 2.27E-30    |
| ABI3       | 5.4650145   | 11.62106794 | 1.088445425  | 1.53E-23    | 7.41E-23    |
| ANKRD10-IT | 2.534112981 | 7.590593428 | 1.582731832  | 1.90E-20    | 7.24E-20    |
| CRHR2      | 0.096275014 | 0.259108678 | 1.428323996  | 1.15E-07    | 1.91E-07    |
| PIDD1      | 0.896995229 | 2.380530926 | 1.408111154  | 3.52E-23    | 1.65E-22    |
| LOXL3      | 0.6874365   | 2.082144719 | 1.598771986  | 8.57E-28    | 5.94E-27    |
| CPNE7      | 0.244287468 | 1.211761063 | 2.310453496  | 3.78E-11    | 7.78E-11    |
| BCAM       | 151.2481679 | 46.54557323 | -1.700201797 | 9.51E-37    | 3.52E-35    |
| GZMB       | 0.760945961 | 4.539312802 | 2.576607999  | 3.66E-32    | 4.45E-31    |
| WSCD2      | 0.783080446 | 0.160998506 | -2.282113219 | 5.93E-37    | 2.35E-35    |
| CD6        | 0.379998834 | 1.976623131 | 2.378970932  | 1.88E-31    | 2.04E-30    |
| RNA5SP296  | 0.103245517 | 0.382537958 | 1.889523766  | 3.37E-07    | 5.44E-07    |
| DHDH       | 9.627835494 | 4.437280615 | -1.117535699 | 0.001773267 | 0.002237834 |
| COBL1      | 21.57975581 | 4.087285029 | -2.40046378  | 4.53E-39    | 3.92E-37    |
| AL353804.2 | 0.036084652 | 0.296991746 | 3.04096559   | 2.15E-16    | 6.17E-16    |
| AC022400.7 | 1.110377342 | 2.818306235 | 1.343778349  | 8.96E-23    | 4.07E-22    |
| ABCB1      | 22.41781958 | 6.986940544 | -1.681913196 | 5.76E-35    | 1.24E-33    |
| RPS6KL1    | 0.309419328 | 0.708671434 | 1.195553579  | 1.57E-11    | 3.30E-11    |
| IGHV1OR15  | 0.195240142 | 0.90479879  | 2.212347293  | 0.000291806 | 0.000389175 |
| AP005233.2 | 0.028870837 | 4.031178858 | 7.125445033  | 3.61E-32    | 4.40E-31    |
| AF111169.3 | 0.075761938 | 0.455529806 | 2.588000311  | 4.35E-25    | 2.38E-24    |
| AL645940.1 | 0.101613925 | 0.317535696 | 1.643820669  | 1.13E-11    | 2.39E-11    |
| PKIB       | 0.732018478 | 1.492922548 | 1.02818735   | 4.24E-08    | 7.24E-08    |
| PRR11      | 0.432956225 | 1.614095739 | 1.898433082  | 1.69E-30    | 1.61E-29    |
| SULT2B1    | 3.078149876 | 0.324451164 | -3.245990234 | 6.37E-13    | 1.47E-12    |
| ABCA4      | 5.704451366 | 0.223627705 | -4.672917303 | 4.49E-38    | 2.70E-36    |
| AFAP1-AS1  | 0.028427279 | 0.416487594 | 3.872925585  | 6.57E-17    | 1.95E-16    |
| AC104072.1 | 2.087981359 | 0.10882948  | -4.26196752  | 5.45E-59    | 1.87E-55    |
| SNORD12C   | 0.067410644 | 0.317382473 | 2.235174136  | 3.87E-10    | 7.47E-10    |
| IGHJ3P     | 0.269995585 | 2.851605053 | 3.400766462  | 2.86E-06    | 4.35E-06    |
| UBXN11     | 2.845217014 | 7.217950686 | 1.343050591  | 9.68E-24    | 4.74E-23    |
| AC067817.2 | 0.250253489 | 0.993010851 | 1.988419302  | 3.68E-11    | 7.57E-11    |
| AC022706.1 | 0.445055972 | 0.917695168 | 1.044028225  | 1.15E-14    | 2.95E-14    |
| PHYKPL     | 2.974751264 | 9.525280338 | 1.678992512  | 1.08E-36    | 3.89E-35    |
| AC073130.2 | 0.091287256 | 0.344391647 | 1.915564774  | 1.81E-23    | 8.71E-23    |
| AC022784.1 | 0.253861588 | 0.844935468 | 1.734799047  | 2.61E-16    | 7.43E-16    |
| PLEKHB1    | 6.76544531  | 1.277988454 | -2.404310095 | 6.65E-36    | 1.84E-34    |
| RUNX2      | 0.500835638 | 1.385548304 | 1.46804788   | 8.29E-22    | 3.50E-21    |
| CHST9      | 0.848224842 | 1.996529543 | 1.234975779  | 0.000435715 | 0.000573856 |
| FAM83B     | 3.061280484 | 0.266432183 | -3.522294969 | 9.03E-39    | 6.89E-37    |
| ADCY10P1   | 0.327390858 | 0.755088947 | 1.205632561  | 5.24E-07    | 8.37E-07    |
| PRODH2     | 35.03860194 | 7.812471513 | -2.165094283 | 0.000158108 | 0.000214549 |
| GPM6B      | 3.772448464 | 0.875595194 | -2.107165251 | 1.18E-34    | 2.35E-33    |
| AC012181.1 | 0.453947644 | 1.343302473 | 1.565186374  | 5.35E-17    | 1.60E-16    |

Table S1. The differentially expressed genes(DEGs) were screened out in TCGA

| ID         | conMean     | treatMean   | logFC        | pValue      | FDR         |
|------------|-------------|-------------|--------------|-------------|-------------|
| TAZ        | 2.512156556 | 5.38509528  | 1.100045496  | 2.19E-28    | 1.63E-27    |
| AC092542.1 | 0.172227987 | 0.657488916 | 1.932646974  | 1.28E-15    | 3.49E-15    |
| LAYN       | 2.395805758 | 5.741435042 | 1.260900431  | 2.68E-20    | 1.01E-19    |
| ENPP1      | 2.860093124 | 1.355302349 | -1.077447389 | 5.50E-23    | 2.54E-22    |
| BHLHB9     | 2.394038931 | 1.161768147 | -1.043124432 | 1.09E-35    | 2.84E-34    |
| C1orf195   | 0.079158108 | 0.405713685 | 2.357652933  | 0.000103589 | 0.000142284 |
| P3H1       | 2.595312167 | 6.425397578 | 1.307877648  | 1.04E-33    | 1.70E-32    |
| NBPF15     | 1.261630086 | 3.07368901  | 1.284682234  | 1.93E-28    | 1.44E-27    |
| H1F0       | 182.7320093 | 48.2787236  | -1.920269935 | 1.58E-19    | 5.64E-19    |
| DGKD       | 1.214062043 | 5.383360917 | 2.148665001  | 4.24E-37    | 1.78E-35    |
| AL353801.1 | 5.664125478 | 1.296056012 | -2.127725157 | 3.69E-29    | 2.98E-28    |
| TNN        | 0.181198397 | 0.380027381 | 1.068533175  | 0.002067913 | 0.002596462 |
| AC132872.4 | 0.068951152 | 0.350134175 | 2.344261325  | 2.03E-23    | 9.72E-23    |
| BTC        | 4.092454764 | 1.157579386 | -1.821855334 | 2.26E-36    | 7.14E-35    |
| MIR26B     | 0.122728698 | 0.395360472 | 1.687696004  | 2.25E-07    | 3.67E-07    |
| TPSAB1     | 1.572556854 | 5.045338535 | 1.681838898  | 2.21E-20    | 8.37E-20    |
| HIST3H2A   | 1.193807828 | 3.426505392 | 1.521167339  | 0.004143083 | 0.005087545 |
| SGK2       | 13.74532426 | 4.641130054 | -1.566392911 | 4.26E-32    | 5.13E-31    |
| HSPD1P4    | 0.128003241 | 0.256017972 | 1.000064748  | 2.88E-10    | 5.61E-10    |
| AC019226.1 | 0.137448829 | 0.424590731 | 1.627178263  | 2.39E-11    | 4.98E-11    |
| AOAH       | 1.455888357 | 6.794139932 | 2.222391204  | 7.55E-30    | 6.58E-29    |
| NINL       | 6.687759208 | 2.922379792 | -1.194379222 | 3.66E-31    | 3.80E-30    |
| STAG3L5P   | 0.671310943 | 2.993066756 | 2.156571391  | 9.82E-20    | 3.56E-19    |
| AC090772.4 | 0.679775266 | 1.389749302 | 1.031694883  | 6.10E-09    | 1.10E-08    |
| AP001001.1 | 0.122395941 | 0.325127129 | 1.409448231  | 3.53E-15    | 9.38E-15    |
| AC122688.3 | 0.131794809 | 0.292732006 | 1.15128694   | 6.53E-09    | 1.17E-08    |
| PODNL1     | 0.132711477 | 0.763149409 | 2.523672395  | 1.62E-08    | 2.84E-08    |
| XIST       | 0.997847339 | 3.059420493 | 1.616367389  | 4.48E-08    | 7.64E-08    |
| MSTN       | 0.111334463 | 0.308371399 | 1.469768729  | 5.41E-09    | 9.78E-09    |
| EEF1DP5    | 0.176288459 | 0.382802403 | 1.118661852  | 7.64E-05    | 0.000105966 |
| GK         | 9.87483969  | 3.711115972 | -1.411904242 | 1.11E-08    | 1.97E-08    |
| TRBV30     | 0.110564428 | 0.62400682  | 2.496674495  | 9.14E-16    | 2.52E-15    |
| CNN2P9     | 0.123444055 | 0.260015253 | 1.0747389    | 3.12E-15    | 8.30E-15    |
| FOXC2      | 2.489140742 | 5.962520783 | 1.260274584  | 1.56E-11    | 3.29E-11    |
| SLC41A2    | 3.536377875 | 8.208456311 | 1.214838493  | 2.03E-31    | 2.19E-30    |
| BEX2       | 28.04341903 | 13.75273846 | -1.027943334 | 5.73E-25    | 3.11E-24    |
| CENPH      | 0.820401667 | 2.090512855 | 1.349454587  | 1.97E-32    | 2.54E-31    |
| AC016405.1 | 0.047758963 | 0.28203702  | 2.562041116  | 5.29E-11    | 1.08E-10    |
| AL139349.1 | 0.288177374 | 1.652000911 | 2.519185511  | 6.87E-17    | 2.03E-16    |
| MIAT       | 0.033592374 | 0.734769957 | 4.451086975  | 1.54E-34    | 2.99E-33    |
| CCDC13     | 0.561429665 | 0.208314667 | -1.430340873 | 7.55E-32    | 8.72E-31    |
| CGNL1      | 51.16667194 | 11.82991647 | -2.112764511 | 2.70E-38    | 1.76E-36    |
| OR52N4     | 0.069167246 | 0.420757039 | 2.60482649   | 3.42E-20    | 1.28E-19    |
| GRB7       | 11.75244738 | 5.090433985 | -1.207100657 | 8.66E-29    | 6.72E-28    |
| HSPE1P18   | 0.054941676 | 0.315441312 | 2.521398793  | 5.70E-14    | 1.40E-13    |
| TNC        | 32.0911616  | 15.00162227 | -1.09705749  | 7.32E-07    | 1.16E-06    |
| CRTAM      | 0.140274249 | 1.197757133 | 3.094013307  | 2.14E-32    | 2.74E-31    |
| ACCS       | 1.497528861 | 3.738437803 | 1.319851723  | 2.75E-20    | 1.04E-19    |
| SCARNA9    | 1.137593669 | 4.280203761 | 1.911694137  | 5.07E-08    | 8.62E-08    |
| HLA-V      | 0.259283128 | 1.137347471 | 2.133072846  | 6.05E-24    | 3.02E-23    |
| AC068580.1 | 0.693650822 | 1.722327894 | 1.312078317  | 3.58E-13    | 8.37E-13    |
| AC119396.2 | 0.191575567 | 0.474303943 | 1.307898282  | 4.11E-07    | 6.60E-07    |
| NRK        | 5.482930404 | 0.191085479 | -4.842657106 | 2.34E-40    | 3.95E-38    |
| CALB2      | 0.097860397 | 0.377642218 | 1.94822301   | 6.93E-19    | 2.35E-18    |
| SNORD46    | 0.221810124 | 1.18370783  | 2.415915911  | 6.21E-16    | 1.73E-15    |

Table S1. The differentially expressed genes(DEGs) were screened out in TCGA

| ID         | conMean     | treatMean   | logFC        | pValue      | FDR         |
|------------|-------------|-------------|--------------|-------------|-------------|
| CDH16      | 346.7096125 | 64.79555573 | -2.419761067 | 3.44E-41    | 9.70E-39    |
| SLC17A9    | 0.202426168 | 2.049075086 | 3.339505141  | 1.32E-34    | 2.60E-33    |
| MUC1       | 62.08031639 | 20.48334161 | -1.599684817 | 2.05E-31    | 2.20E-30    |
| RF00569    | 0.310338035 | 0.722297459 | 1.218752573  | 1.18E-06    | 1.84E-06    |
| SNORA71B   | 0.209083912 | 0.889761927 | 2.089337311  | 1.96E-17    | 6.03E-17    |
| AP005131.7 | 0.25014345  | 0.524083239 | 1.067040294  | 1.64E-07    | 2.70E-07    |
| AC110285.6 | 0.073989429 | 0.267158638 | 1.852305587  | 9.70E-07    | 1.52E-06    |
| ITIH1      | 0.013430357 | 0.840533927 | 5.967736519  | 3.21E-12    | 7.07E-12    |
| AL731533.2 | 0.979157867 | 4.530346454 | 2.210007998  | 8.21E-32    | 9.39E-31    |
| SPACA9     | 5.895429194 | 2.648956562 | -1.154172661 | 4.33E-32    | 5.19E-31    |
| PANK1      | 7.949893347 | 2.990223588 | -1.410682143 | 4.50E-28    | 3.23E-27    |
| ZNF83      | 3.586138097 | 10.22595921 | 1.511733226  | 2.46E-29    | 2.03E-28    |
| PRMT6      | 14.29197143 | 5.905813857 | -1.274997145 | 1.43E-39    | 1.65E-37    |
| ATP6V1H    | 21.75309986 | 9.566379163 | -1.185176124 | 3.84E-37    | 1.64E-35    |
| TUBA3E     | 0.265976945 | 1.287764595 | 2.275495789  | 2.54E-21    | 1.04E-20    |
| AC025271.4 | 0.866756792 | 0.178520735 | -2.279535586 | 1.05E-35    | 2.76E-34    |
| IGLV2-5    | 0.083196887 | 0.284356473 | 1.773099187  | 0.002923973 | 0.003630149 |
| MMP14      | 23.03693632 | 62.71335094 | 1.444823743  | 1.19E-28    | 9.08E-28    |
| CH25H      | 2.768572289 | 1.085744478 | -1.350457577 | 1.26E-09    | 2.37E-09    |
| LUM        | 71.24277354 | 28.76824695 | -1.308266373 | 4.92E-18    | 1.57E-17    |
| CXCL10     | 3.230415582 | 35.63265339 | 3.463408238  | 1.08E-31    | 1.21E-30    |
| HOXD3      | 1.527709192 | 0.717585459 | -1.090147383 | 8.17E-23    | 3.72E-22    |
| RFX8       | 0.05793485  | 0.649467406 | 3.48675378   | 6.13E-36    | 1.71E-34    |
| CROCCP3    | 0.243826423 | 0.678686399 | 1.476890625  | 1.64E-15    | 4.45E-15    |
| MAPRE2     | 10.41575403 | 21.20408949 | 1.02557525   | 1.78E-27    | 1.20E-26    |
| CX3CL1     | 20.38310458 | 41.15719871 | 1.013770984  | 3.02E-18    | 9.80E-18    |
| TRGC2      | 0.210222527 | 1.067557081 | 2.34432403   | 1.49E-25    | 8.51E-25    |
| RNU6-762P  | 0.234840984 | 0.748848148 | 1.672988991  | 2.91E-11    | 6.03E-11    |
| HOXA13     | 0.07170623  | 0.386841028 | 2.431570428  | 8.23E-12    | 1.77E-11    |
| STRA6      | 2.406388614 | 0.153884146 | -3.966953138 | 2.12E-23    | 1.01E-22    |
| PLCXD3     | 2.719047508 | 0.783007491 | -1.796003344 | 1.04E-27    | 7.17E-27    |
| GTF2IP14   | 0.23996966  | 0.497630581 | 1.052223131  | 2.99E-08    | 5.16E-08    |
| TAP2       | 3.191248139 | 7.1862553   | 1.171119398  | 4.42E-29    | 3.55E-28    |
| CD40       | 6.298331111 | 22.51214435 | 1.837661976  | 6.24E-36    | 1.74E-34    |
| AGAP13P    | 0.131014963 | 0.571561446 | 2.125177015  | 6.01E-14    | 1.47E-13    |
| MYBL1      | 0.341752438 | 1.169402929 | 1.774748578  | 6.01E-32    | 7.08E-31    |
| FMR1-IT1   | 0.277187352 | 0.778214173 | 1.489305823  | 1.35E-11    | 2.85E-11    |
| AC093827.3 | 0.255533635 | 0.730213015 | 1.514804185  | 7.48E-21    | 2.93E-20    |
| AC020658.5 | 0.136235651 | 0.421622932 | 1.629849046  | 8.67E-17    | 2.55E-16    |
| CFB        | 2.074003074 | 5.07234635  | 1.290235227  | 5.15E-16    | 1.44E-15    |
| RNU6-1098P | 0.206832596 | 0.83792283  | 2.018353817  | 1.06E-12    | 2.42E-12    |
| ZBTB32     | 0.074897747 | 0.271962501 | 1.860413514  | 5.70E-23    | 2.63E-22    |
| ENKUR      | 0.193718139 | 0.558118736 | 1.526613034  | 2.44E-15    | 6.54E-15    |
| DARS-AS1   | 0.113055018 | 1.029901889 | 3.18740998   | 1.51E-37    | 7.48E-36    |
| AL513164.1 | 0.013057602 | 0.430836864 | 5.044179809  | 3.15E-12    | 6.93E-12    |
| AC104237.2 | 3.063654486 | 0.149280169 | -4.359159176 | 3.58E-48    | 3.35E-45    |
| PLVAP      | 92.60878361 | 358.9141602 | 1.954417903  | 1.04E-25    | 6.01E-25    |
| MASP1      | 0.967176061 | 4.030233341 | 2.059012928  | 4.09E-19    | 1.41E-18    |
| MATN2      | 14.61173775 | 6.742851655 | -1.115697002 | 1.14E-25    | 6.56E-25    |
| TRAF3IP2   | 3.322183208 | 6.941959833 | 1.063211382  | 6.09E-29    | 4.81E-28    |
| SYT7       | 6.772723254 | 0.571535449 | -3.566821157 | 6.20E-38    | 3.55E-36    |
| MIR6753    | 0.047639953 | 0.394986168 | 3.051558239  | 5.20E-15    | 1.36E-14    |
| AC004492.1 | 0.445941253 | 0.918408612 | 1.042282505  | 4.23E-12    | 9.24E-12    |
| RUNX1      | 1.330867568 | 4.475056271 | 1.749538805  | 1.61E-27    | 1.09E-26    |
| PCDHGA5    | 0.202829452 | 0.43161648  | 1.089482794  | 0.003700817 | 0.004562421 |

Table S1. The differentially expressed genes(DEGs) were screened out in TCGA

| ID          | conMean     | treatMean   | logFC        | pValue      | FDR         |
|-------------|-------------|-------------|--------------|-------------|-------------|
| AC012531.1  | 0.218904982 | 0.463267426 | 1.081540457  | 1.10E-06    | 1.72E-06    |
| NFATC2      | 1.54546936  | 3.506266326 | 1.181890531  | 8.23E-23    | 3.74E-22    |
| CXorf36     | 2.925778058 | 10.8789871  | 1.894651999  | 1.41E-27    | 9.62E-27    |
| AL353699.1  | 0.925549902 | 0.316665739 | -1.547349987 | 8.29E-43    | 4.49E-40    |
| AC138466.1  | 0.511514067 | 0.218870144 | -1.224698744 | 1.40E-14    | 3.56E-14    |
| AC092376.2  | 0.173537563 | 0.496127797 | 1.515463819  | 3.64E-22    | 1.58E-21    |
| SPC25       | 0.338747939 | 1.2127816   | 1.840035695  | 4.00E-28    | 2.88E-27    |
| TMED10P2    | 1.248036803 | 0.290014011 | -2.10546597  | 4.58E-28    | 3.28E-27    |
| FAIM2       | 0.630381083 | 0.202041075 | -1.641575621 | 2.46E-17    | 7.52E-17    |
| PIMREG      | 0.161342184 | 0.779358344 | 2.272163135  | 2.81E-32    | 3.49E-31    |
| HAR1A       | 0.104966869 | 0.27141485  | 1.370565618  | 1.04E-12    | 2.35E-12    |
| JAK3        | 0.925142496 | 4.953011168 | 2.420558374  | 4.17E-33    | 6.08E-32    |
| TLR7        | 0.653760812 | 2.853060323 | 2.125675444  | 1.31E-24    | 6.92E-24    |
| IL3RA       | 4.988365139 | 13.59181659 | 1.446099313  | 3.31E-28    | 2.40E-27    |
| FABP5       | 1.390030232 | 5.110482824 | 1.878343339  | 3.53E-28    | 2.56E-27    |
| ZNF841      | 1.416332813 | 3.094095951 | 1.127357624  | 1.89E-20    | 7.20E-20    |
| AC074124.1  | 0.103218206 | 0.722236819 | 2.806774507  | 1.96E-12    | 4.37E-12    |
| AL162727.2  | 0.121847813 | 0.335702403 | 1.46210251   | 4.40E-17    | 1.32E-16    |
| AC016773.1  | 0.107833654 | 0.677946824 | 2.652364619  | 1.23E-20    | 4.73E-20    |
| AUH         | 23.52458606 | 10.78687134 | -1.124892856 | 2.04E-32    | 2.61E-31    |
| LCMT1-AS1   | 0.41879998  | 0.174382402 | -1.264006916 | 1.73E-22    | 7.69E-22    |
| TRBJ2-7     | 0.354102063 | 2.373454182 | 2.744751048  | 1.10E-19    | 3.97E-19    |
| TUBA3D      | 1.026352915 | 8.410392006 | 3.034646153  | 2.79E-32    | 3.47E-31    |
| GIMAP4      | 16.13566226 | 40.81144483 | 1.338720995  | 2.76E-27    | 1.83E-26    |
| C4A         | 3.652500701 | 12.22123267 | 1.742433353  | 2.33E-19    | 8.21E-19    |
| IGLV6-57    | 4.468005686 | 20.71576499 | 2.21302617   | 2.28E-06    | 3.49E-06    |
| AC005034.2  | 0.10046658  | 0.236128884 | 1.232858856  | 7.18E-07    | 1.14E-06    |
| NOG         | 0.237738849 | 1.549986074 | 2.704805674  | 0.003555884 | 0.004389528 |
| PATL2       | 0.094733664 | 0.707778679 | 2.901349218  | 7.12E-35    | 1.50E-33    |
| EVI2A       | 1.999889547 | 7.42991654  | 1.893425682  | 1.07E-28    | 8.16E-28    |
| HLX         | 0.745428161 | 4.359822848 | 2.548128287  | 1.10E-35    | 2.85E-34    |
| ERVK9-11    | 0.70537211  | 2.369300617 | 1.748004822  | 8.26E-17    | 2.43E-16    |
| AC245884.12 | 0.392623813 | 0.948369941 | 1.272302262  | 6.63E-06    | 9.86E-06    |
| FLNB-AS1    | 0.175709722 | 0.408250946 | 1.216262208  | 9.90E-07    | 1.55E-06    |
| TAC4        | 0.101514647 | 0.264759268 | 1.382993292  | 3.67E-11    | 7.57E-11    |
| MTHFD2      | 3.049140875 | 6.126585107 | 1.006680349  | 1.55E-17    | 4.81E-17    |
| HRH1        | 1.60164341  | 3.260223493 | 1.025417885  | 9.01E-16    | 2.49E-15    |
| MIR199A1    | 0.029208118 | 0.324302979 | 3.472900967  | 1.85E-10    | 3.65E-10    |
| LINC02310   | 0.008784105 | 0.256274742 | 4.866652233  | 5.06E-28    | 3.60E-27    |
| GABBR1      | 1.150887806 | 2.58000423  | 1.164626232  | 2.15E-07    | 3.52E-07    |
| TNK2        | 1.355112267 | 3.610297541 | 1.413705362  | 7.42E-32    | 8.58E-31    |
| CLEC2D      | 0.407064292 | 2.439841623 | 2.583458925  | 5.72E-37    | 2.29E-35    |
| SNRPGP14    | 0.267718019 | 0.658904502 | 1.299355141  | 1.91E-08    | 3.33E-08    |
| AL138899.2  | 0.076412959 | 0.231853502 | 1.601324287  | 1.20E-06    | 1.88E-06    |
| CCDC81      | 0.087436416 | 0.224665158 | 1.361470228  | 2.15E-21    | 8.81E-21    |
| ARHGAP30    | 1.908123682 | 7.969489049 | 2.062332543  | 1.15E-31    | 1.28E-30    |
| AC006148.2  | 0.015891718 | 0.322356575 | 4.342310366  | 8.02E-19    | 2.71E-18    |
| AC004540.2  | 6.333620961 | 2.140098806 | -1.565353125 | 1.30E-27    | 8.85E-27    |
| MIR1972-1   | 0.097426021 | 0.355342958 | 1.866833062  | 2.27E-06    | 3.48E-06    |
| CDH3        | 4.301000457 | 0.906115368 | -2.246905631 | 1.17E-35    | 3.01E-34    |
| LINC02362   | 0.032315737 | 0.251135043 | 2.958154555  | 8.55E-21    | 3.34E-20    |
| VWA2        | 1.127260921 | 0.148274917 | -2.926475015 | 5.71E-35    | 1.24E-33    |
| AC004466.3  | 0.166598781 | 0.482635368 | 1.534555796  | 7.54E-07    | 1.19E-06    |
| AC008991.2  | 0.02153308  | 0.409407659 | 4.248911476  | 3.46E-13    | 8.10E-13    |
| AC007497.1  | 0.072972847 | 0.271837423 | 1.897312429  | 3.19E-17    | 9.67E-17    |

Table S1. The differentially expressed genes(DEGs) were screened out in TCGA

| ID         | conMean     | treatMean   | logFC        | pValue      | FDR         |
|------------|-------------|-------------|--------------|-------------|-------------|
| AC103591.2 | 0.330474105 | 0.79709639  | 1.270216963  | 1.70E-14    | 4.31E-14    |
| AC026250.1 | 0.156297453 | 0.51963389  | 1.733201256  | 8.78E-27    | 5.56E-26    |
| SIPA1      | 5.759921125 | 12.31063644 | 1.095784388  | 2.04E-29    | 1.70E-28    |
| LIMD2      | 1.263923631 | 5.080647671 | 2.007103126  | 8.39E-31    | 8.30E-30    |
| PFKFB3     | 101.8757353 | 41.65925882 | -1.290101396 | 0.039439136 | 0.044843041 |
| SIGLEC14   | 0.703643475 | 2.200836907 | 1.645135711  | 2.17E-19    | 7.67E-19    |
| RALBP1     | 39.63920847 | 14.36988403 | -1.463879736 | 2.29E-38    | 1.52E-36    |
| CYGB       | 3.984707111 | 16.16402176 | 2.020240608  | 2.69E-29    | 2.21E-28    |
| SCG2       | 0.206756901 | 3.342029928 | 4.014717263  | 1.19E-27    | 8.15E-27    |
| LRRC37A7P  | 0.803054989 | 2.524471362 | 1.652410626  | 8.73E-05    | 0.00012049  |
| CD8B       | 0.386198107 | 4.244911035 | 3.45832132   | 2.84E-29    | 2.33E-28    |
| HNRNPCP7   | 0.306213483 | 0.651829275 | 1.089956342  | 1.95E-13    | 4.62E-13    |
| AL117335.1 | 0.307360112 | 2.085682196 | 2.762517492  | 3.56E-32    | 4.35E-31    |
| IGHM       | 27.09973814 | 110.5711665 | 2.028624408  | 2.61E-09    | 4.82E-09    |
| CHEK2      | 0.716620594 | 1.652296421 | 1.205191119  | 2.16E-28    | 1.60E-27    |
| FAM13A-AS1 | 0.216505404 | 1.241791942 | 2.519948536  | 1.42E-29    | 1.21E-28    |
| TMEM131L   | 1.654800676 | 3.664675921 | 1.14702817   | 4.22E-31    | 4.34E-30    |
| TRAV13-2   | 0.121282795 | 0.650105494 | 2.422298941  | 4.92E-19    | 1.69E-18    |
| TCIM       | 121.0886589 | 26.42338456 | -2.196176572 | 7.02E-30    | 6.15E-29    |
| SPRY1      | 12.62340775 | 32.46900275 | 1.362961649  | 3.26E-19    | 1.14E-18    |
| ADAMTSL4   | 0.748160844 | 3.312091799 | 2.146322291  | 1.58E-29    | 1.33E-28    |
| AC116407.4 | 0.070262868 | 0.287690981 | 2.03368562   | 8.05E-28    | 5.60E-27    |
| YEATS2-AS1 | 0.080667792 | 0.454780835 | 2.495106785  | 4.10E-30    | 3.71E-29    |
| TRAV6      | 0.068594009 | 0.376544184 | 2.456664669  | 9.46E-16    | 2.61E-15    |
| FAM184A    | 1.213793374 | 0.429882782 | -1.497507618 | 3.97E-30    | 3.60E-29    |
| KDF1       | 8.565026236 | 2.013979033 | -2.088409001 | 4.69E-37    | 1.94E-35    |
| ALOX12B    | 0.090868373 | 0.354813187 | 1.965209486  | 1.93E-16    | 5.55E-16    |
| RPL4P3     | 0.066248092 | 0.364626201 | 2.460467421  | 1.35E-17    | 4.20E-17    |
| DES        | 21.21334589 | 7.238267128 | -1.551255933 | 2.96E-11    | 6.13E-11    |
| EEF1B2P6   | 0.513079303 | 1.082180747 | 1.076687745  | 8.02E-16    | 2.22E-15    |
| SH3BGRL3   | 43.17038736 | 91.00906628 | 1.075968235  | 7.83E-23    | 3.57E-22    |
| ARAP1-AS2  | 0.034522458 | 0.259971451 | 2.912746129  | 2.66E-23    | 1.26E-22    |
| NTRK2      | 7.674335042 | 1.867513918 | -2.038922755 | 1.74E-28    | 1.31E-27    |
| PALM       | 15.80622343 | 5.191854036 | -1.606170978 | 7.06E-35    | 1.49E-33    |
| TNXB       | 2.262375688 | 1.055668946 | -1.09968104  | 3.84E-17    | 1.16E-16    |
| ADH1B      | 20.46521623 | 3.096128932 | -2.724636454 | 7.11E-34    | 1.20E-32    |
| OTOG       | 1.261174361 | 0.249957505 | -2.335012997 | 2.67E-05    | 3.81E-05    |
| CD300LB    | 0.244598136 | 0.797307115 | 1.704722131  | 2.24E-25    | 1.26E-24    |
| RGS18      | 0.687485483 | 2.176571798 | 1.662656455  | 4.05E-23    | 1.89E-22    |
| E2F1       | 0.613877008 | 2.711799959 | 2.143229217  | 5.71E-35    | 1.24E-33    |
| TMEM132A   | 2.294615254 | 5.101729312 | 1.152734082  | 1.37E-13    | 3.28E-13    |
| AC091563.1 | 12.35485101 | 5.590588135 | -1.144005645 | 1.69E-32    | 2.21E-31    |
| PRKCQ      | 8.453836333 | 2.651547517 | -1.67277158  | 4.39E-26    | 2.63E-25    |
| KAZN       | 4.954413361 | 2.341622419 | -1.081205778 | 5.58E-29    | 4.42E-28    |
| TLR5       | 4.342319604 | 1.913259175 | -1.182433597 | 1.39E-20    | 5.34E-20    |
| GAS6-AS1   | 0.111491808 | 2.010099004 | 4.172256946  | 2.68E-39    | 2.67E-37    |
| MIR5581    | 0.479895863 | 0.994037734 | 1.050579244  | 0.000121394 | 0.000166075 |
| CEP55      | 0.350289878 | 1.757562239 | 2.326954574  | 9.63E-34    | 1.58E-32    |
| GATA3-AS1  | 1.868654362 | 0.074523803 | -4.648154642 | 1.15E-42    | 5.90E-40    |
| AC092325.1 | 1.648129599 | 0.056590993 | -4.864113425 | 1.03E-21    | 4.33E-21    |
| IGLV3-27   | 0.951204104 | 4.225916517 | 2.151437422  | 0.000463089 | 0.000608739 |
| AC131212.3 | 0.123488337 | 0.255878551 | 1.051084428  | 6.55E-09    | 1.18E-08    |
| AP000919.4 | 0.11305397  | 0.268124583 | 1.245891842  | 5.06E-12    | 1.10E-11    |
| BRWD1-AS2  | 1.017552271 | 0.331309407 | -1.618851835 | 4.43E-28    | 3.18E-27    |
| AC091390.1 | 0.169001031 | 1.517106222 | 3.166218146  | 3.60E-35    | 8.16E-34    |

Table S1. The differentially expressed genes(DEGs) were screened out in TCGA

| ID         | conMean     | treatMean   | logFC        | pValue      | FDR         |
|------------|-------------|-------------|--------------|-------------|-------------|
| VAMP1      | 1.208645467 | 2.450813733 | 1.019869721  | 9.19E-08    | 1.54E-07    |
| SNRNP70    | 14.58716831 | 29.42471599 | 1.012328639  | 1.19E-17    | 3.72E-17    |
| AC114730.3 | 0.105112435 | 0.500254576 | 2.250729112  | 1.02E-14    | 2.62E-14    |
| LINC00894  | 0.117141069 | 0.545007525 | 2.218029179  | 2.86E-15    | 7.64E-15    |
| DTHD1      | 0.025331771 | 0.25359307  | 3.323495464  | 4.26E-28    | 3.06E-27    |
| AP002340.1 | 0.120917516 | 0.31045154  | 1.360344835  | 2.27E-08    | 3.94E-08    |
| AC009133.1 | 0.80922559  | 2.517896361 | 1.637605053  | 4.33E-32    | 5.19E-31    |
| HAVCR2     | 6.370026603 | 23.52073779 | 1.884562012  | 1.68E-18    | 5.56E-18    |
| EXO1       | 0.161270118 | 0.525297646 | 1.703655979  | 7.07E-30    | 6.20E-29    |
| AL121782.1 | 0.072199328 | 0.25322588  | 1.810367554  | 5.62E-15    | 1.47E-14    |
| RHEX       | 4.348334465 | 17.28271285 | 1.990794874  | 9.06E-22    | 3.81E-21    |
| CSDC2      | 9.100150464 | 3.710531283 | -1.294264629 | 4.61E-15    | 1.21E-14    |
| AK3        | 41.77613681 | 15.12056843 | -1.466166711 | 1.50E-39    | 1.70E-37    |
| AC132192.2 | 0.393124334 | 0.861511963 | 1.131885163  | 8.01E-06    | 1.19E-05    |
| DISC1      | 0.326601612 | 1.055304684 | 1.692055773  | 5.87E-33    | 8.29E-32    |
| LINC02586  | 0.944605584 | 0.410852761 | -1.201090603 | 8.47E-23    | 3.85E-22    |
| SPHK2      | 4.412089446 | 1.96998958  | -1.16327404  | 1.29E-34    | 2.56E-33    |
| PRELID3A   | 0.239516872 | 0.742347295 | 1.631967     | 1.29E-30    | 1.24E-29    |
| STUM       | 3.30958114  | 1.531752562 | -1.111465377 | 1.09E-15    | 2.99E-15    |
| AC116667.1 | 0.225576628 | 0.594042856 | 1.396949418  | 1.63E-13    | 3.89E-13    |
| AL138831.3 | 0.143119701 | 0.536279925 | 1.905763974  | 2.07E-15    | 5.57E-15    |
| GULOP      | 0.122635273 | 0.345777852 | 1.495471469  | 3.38E-07    | 5.45E-07    |
| AC103982.1 | 0.078885638 | 0.268765557 | 1.768513701  | 5.36E-13    | 1.24E-12    |
| GAPDHP59   | 0.063612714 | 0.229796802 | 1.85297167   | 8.97E-08    | 1.50E-07    |
| RIPPLY1    | 1.584640428 | 0.223548539 | -2.825495493 | 1.54E-31    | 1.69E-30    |
| PPFIA4     | 0.369549845 | 3.517686723 | 3.250786133  | 2.44E-29    | 2.01E-28    |
| STK33      | 1.609813536 | 0.511475146 | -1.654157548 | 4.82E-31    | 4.92E-30    |
| HOXB-AS1   | 0.841338688 | 2.117972234 | 1.331925086  | 4.21E-18    | 1.35E-17    |
| AC092338.1 | 0.111578252 | 0.428301333 | 1.940570306  | 1.49E-13    | 3.56E-13    |
| HLA-DRB9   | 0.309947769 | 0.898673851 | 1.535772503  | 1.80E-11    | 3.79E-11    |
| GUCY1B1    | 8.465010681 | 19.57593569 | 1.209497473  | 3.37E-29    | 2.74E-28    |
| FHOD1      | 2.949295986 | 7.160100064 | 1.279609134  | 6.27E-32    | 7.36E-31    |
| HDC        | 0.093007408 | 0.349956859 | 1.911759548  | 1.06E-17    | 3.30E-17    |
| AC079907.1 | 0.148504083 | 0.461424425 | 1.635591781  | 3.38E-16    | 9.59E-16    |
| HOXA7      | 3.380404974 | 1.194312178 | -1.501016104 | 2.41E-30    | 2.24E-29    |
| AC010531.5 | 0.043424322 | 0.244724432 | 2.49458291   | 4.56E-18    | 1.46E-17    |
| PDCL3P5    | 0.114453043 | 0.350743695 | 1.615661349  | 4.89E-18    | 1.56E-17    |
| EDDM13     | 0.115661677 | 0.239641417 | 1.050966348  | 0.000348296 | 0.000461793 |
| HPD        | 114.4395138 | 3.977336003 | -4.846639018 | 1.39E-24    | 7.31E-24    |
| HEYL       | 7.11452725  | 22.30896922 | 1.648784056  | 2.43E-20    | 9.15E-20    |
| AC122134.1 | 0.023159963 | 0.57588524  | 4.636076514  | 1.05E-33    | 1.71E-32    |
| IGLJ2      | 0.114384091 | 0.39731721  | 1.796404877  | 0.00885332  | 0.01060832  |
| LINC02453  | 0.537580933 | 0.236877769 | -1.18233916  | 1.74E-27    | 1.18E-26    |
| AP001010.1 | 0.038194448 | 0.306582946 | 3.004842584  | 2.03E-24    | 1.05E-23    |
| MDK        | 7.52182584  | 24.04585735 | 1.676633558  | 3.42E-08    | 5.88E-08    |
| MYO1G      | 0.345630548 | 2.198040497 | 2.668915327  | 8.42E-35    | 1.74E-33    |
| GPR182     | 0.806947868 | 0.156122974 | -2.369792624 | 2.29E-35    | 5.46E-34    |
| C10orf55   | 0.939172528 | 0.194072759 | -2.274792578 | 5.44E-25    | 2.96E-24    |
| RNU6-1095P | 0.172261533 | 0.487243038 | 1.500040999  | 6.60E-09    | 1.19E-08    |
| RPL13P12   | 8.107457819 | 20.78481329 | 1.35820827   | 5.55E-11    | 1.13E-10    |
| BCKDHB     | 10.61940158 | 4.431452988 | -1.260850757 | 1.10E-35    | 2.85E-34    |
| AP001767.3 | 0.207632478 | 0.562414852 | 1.437602568  | 6.03E-12    | 1.30E-11    |
| PIGHP1     | 0.136174679 | 0.319477761 | 1.230257047  | 1.98E-11    | 4.14E-11    |
| RAPGEFL1   | 0.331838028 | 1.127817051 | 1.76498193   | 1.68E-29    | 1.42E-28    |
| AC064801.1 | 0.73152387  | 0.276336511 | -1.40447875  | 6.00E-24    | 3.00E-23    |

Table S1. The differentially expressed genes(DEGs) were screened out in TCGA

| ID           | conMean     | treatMean   | logFC        | pValue      | FDR         |
|--------------|-------------|-------------|--------------|-------------|-------------|
| BIRC3        | 5.138881764 | 25.90594016 | 2.333756578  | 1.64E-29    | 1.38E-28    |
| PMEP1        | 8.418645319 | 25.88378275 | 1.620388466  | 1.25E-24    | 6.63E-24    |
| AC099811.4   | 0.039752076 | 0.252464404 | 2.666977876  | 2.65E-10    | 5.17E-10    |
| VIP          | 0.100782698 | 0.450943659 | 2.161699212  | 9.95E-14    | 2.40E-13    |
| AL731563.1   | 0.020923057 | 0.263556299 | 3.654945635  | 5.90E-14    | 1.45E-13    |
| IDH2         | 133.58927   | 61.13909096 | -1.127637127 | 7.68E-26    | 4.50E-25    |
| AC007611.1   | 0.137334498 | 0.328374288 | 1.257647093  | 4.88E-26    | 2.91E-25    |
| LRRC7        | 0.084792912 | 0.250492213 | 1.562750188  | 1.04E-08    | 1.85E-08    |
| PDXK         | 21.94630433 | 10.24707435 | -1.098765952 | 1.12E-21    | 4.68E-21    |
| IGLV5-52     | 0.050711024 | 0.3164373   | 2.641548368  | 4.58E-09    | 8.30E-09    |
| AP000692.1   | 0.192446729 | 0.716232717 | 1.895969272  | 2.00E-18    | 6.56E-18    |
| IGLV4-3      | 0.073914308 | 0.297659233 | 2.00973609   | 0.009128675 | 0.010927446 |
| RPL21P54     | 0.113647491 | 0.229109209 | 1.011469611  | 7.19E-06    | 1.07E-05    |
| MIR509-2     | 0.020975217 | 0.358844878 | 4.09660271   | 1.32E-13    | 3.16E-13    |
| PARP15       | 0.095127862 | 0.638959801 | 2.74778531   | 4.82E-31    | 4.92E-30    |
| AC010319.1   | 0.095278534 | 0.388062927 | 2.0260675    | 2.99E-28    | 2.18E-27    |
| SYTL4        | 3.770526444 | 1.686548787 | -1.160691916 | 1.32E-23    | 6.41E-23    |
| CCDC18       | 0.258530607 | 0.637633664 | 1.302392711  | 5.29E-22    | 2.26E-21    |
| TMSB10       | 602.5835472 | 2548.010179 | 2.080137853  | 1.48E-35    | 3.71E-34    |
| CROT         | 8.556267792 | 3.563531557 | -1.263673936 | 2.54E-39    | 2.57E-37    |
| HLA-DRB1     | 205.239071  | 640.0057864 | 1.640779549  | 4.50E-28    | 3.23E-27    |
| ENGASE       | 1.805922322 | 3.818675755 | 1.080336585  | 5.75E-14    | 1.41E-13    |
| SEMA3B       | 11.76148754 | 4.609254218 | -1.351465292 | 1.93E-28    | 1.44E-27    |
| AL391994.1   | 0.078117904 | 0.262832    | 1.750415786  | 2.31E-09    | 4.28E-09    |
| BST2         | 54.71206903 | 134.9449007 | 1.302439442  | 7.78E-23    | 3.54E-22    |
| PALM3        | 15.46477183 | 4.164686495 | -1.892705745 | 2.40E-31    | 2.56E-30    |
| C2orf15      | 2.981314942 | 0.819515768 | -1.863105175 | 6.14E-38    | 3.54E-36    |
| CD8A         | 0.902661944 | 11.31597051 | 3.648030728  | 7.87E-32    | 9.04E-31    |
| AC007342.5   | 0.902256864 | 0.155843806 | -2.533437397 | 3.76E-36    | 1.10E-34    |
| P2RY14       | 0.934705558 | 2.074994699 | 1.150523773  | 3.09E-13    | 7.24E-13    |
| PSMB8        | 23.5900901  | 72.09384719 | 1.61169521   | 1.60E-39    | 1.79E-37    |
| TRAV14DV4    | 0.124019138 | 0.70335574  | 2.503691783  | 4.07E-19    | 1.41E-18    |
| LINC01954    | 0.746078342 | 0.35486099  | -1.072073142 | 0.000188356 | 0.000254337 |
| LRRC66       | 0.203381476 | 0.811747103 | 1.996842043  | 3.03E-22    | 1.32E-21    |
| AC009120.1   | 0.730694297 | 2.358117531 | 1.690295773  | 1.61E-16    | 4.66E-16    |
| LINC01336    | 0.702346083 | 0.304701819 | -1.204783984 | 1.47E-25    | 8.42E-25    |
| LAPTM5       | 17.44166918 | 101.6070442 | 2.542390406  | 1.45E-36    | 5.01E-35    |
| RAB11FIP1P10 | 0.322021564 | 0.902723143 | 1.487126294  | 4.37E-13    | 1.02E-12    |
| SSPN         | 3.265431806 | 7.386656117 | 1.177647635  | 1.32E-22    | 5.91E-22    |
| AC010463.3   | 0.11836407  | 0.314820465 | 1.411298114  | 7.37E-11    | 1.49E-10    |
| KCTD13       | 1.461181443 | 3.00140151  | 1.038500991  | 1.74E-29    | 1.46E-28    |
| AC018638.1   | 1.077628308 | 3.025687846 | 1.489403501  | 2.50E-19    | 8.79E-19    |
| AC090527.3   | 0.098437373 | 0.221189905 | 1.168007479  | 4.18E-05    | 5.88E-05    |
| RNU6-10P     | 0.036993042 | 0.311285262 | 3.072911412  | 2.46E-11    | 5.13E-11    |
| AL121899.1   | 0.289443002 | 0.790484306 | 1.449457542  | 1.87E-11    | 3.91E-11    |
| RPL23AP18    | 0.157185741 | 0.320771113 | 1.029073877  | 1.07E-07    | 1.78E-07    |
| AC092279.2   | 0.170190622 | 0.439172291 | 1.367635491  | 1.40E-07    | 2.32E-07    |
| MCCD1        | 21.57575429 | 0.998619203 | -4.433332538 | 1.78E-40    | 3.33E-38    |
| GPR20        | 0.28617994  | 0.728449682 | 1.347906772  | 4.43E-08    | 7.56E-08    |
| AL132780.1   | 1.342400154 | 0.406507441 | -1.723461121 | 3.87E-25    | 2.13E-24    |
| VWFP1        | 0.13309167  | 0.854219307 | 2.682186226  | 6.04E-17    | 1.79E-16    |
| OCLM         | 0.130457288 | 0.449684878 | 1.785336822  | 1.11E-15    | 3.05E-15    |
| AC104758.2   | 0.103819454 | 0.330996036 | 1.672737134  | 9.82E-16    | 2.70E-15    |
| ADGRG3       | 0.114641721 | 0.371275757 | 1.695358945  | 3.21E-11    | 6.64E-11    |
| FOXM1        | 0.435162837 | 2.359437653 | 2.438815788  | 4.56E-34    | 8.00E-33    |



Table S1. The differentially expressed genes(DEGs) were screened out in TCGA

| ID         | conMean     | treatMean   | logFC        | pValue      | FDR         |
|------------|-------------|-------------|--------------|-------------|-------------|
| AC019257.1 | 0.414670791 | 2.352645847 | 2.504245828  | 7.20E-24    | 3.56E-23    |
| SUZ12P1    | 0.82686225  | 1.668476903 | 1.012812805  | 1.76E-14    | 4.45E-14    |
| ETV4       | 1.055346785 | 0.421475562 | -1.324196254 | 4.04E-26    | 2.43E-25    |
| IRS1       | 5.109214208 | 2.455880879 | -1.056860838 | 3.36E-25    | 1.86E-24    |
| BDKRB2     | 8.286683708 | 3.59522943  | -1.204711018 | 2.28E-25    | 1.28E-24    |
| DSCAML1    | 0.991171853 | 2.51063886  | 1.340847397  | 7.54E-17    | 2.23E-16    |
| HLA-U      | 0.988192049 | 3.252757761 | 1.718800032  | 2.72E-14    | 6.81E-14    |
| CLMP       | 2.752997482 | 1.304185427 | -1.077854287 | 1.43E-23    | 6.92E-23    |
| KCNH3      | 0.711739521 | 0.181763144 | -1.969289648 | 1.17E-34    | 2.33E-33    |
| LMBR1L     | 2.073119292 | 5.576572156 | 1.427575455  | 1.29E-34    | 2.56E-33    |
| IFNWP19    | 0.882933873 | 0.330456723 | -1.417844042 | 8.17E-18    | 2.57E-17    |
| ASAP1      | 4.152569333 | 8.760192432 | 1.076958305  | 1.14E-25    | 6.56E-25    |
| CARMN      | 0.107672238 | 0.409489687 | 1.9271808    | 5.49E-12    | 1.19E-11    |
| AC002070.1 | 0.834902158 | 2.041992126 | 1.290298259  | 1.31E-23    | 6.37E-23    |
| TNFSF9     | 0.555273832 | 6.020362831 | 3.438579124  | 6.92E-34    | 1.17E-32    |
| MIR148A    | 0.054979621 | 0.234255497 | 2.091114042  | 1.73E-06    | 2.67E-06    |
| AL157935.2 | 0.091951719 | 0.416358534 | 2.178877951  | 7.17E-20    | 2.62E-19    |
| EBI3       | 0.982246128 | 4.88358894  | 2.31378529   | 1.62E-33    | 2.53E-32    |
| B4GALNT1   | 0.19358754  | 2.863771179 | 3.886858222  | 2.96E-28    | 2.17E-27    |
| NUDT10     | 1.582994853 | 0.253464574 | -2.64280054  | 2.03E-36    | 6.53E-35    |
| ATG9B      | 0.112389562 | 0.869842456 | 2.952246071  | 2.52E-29    | 2.07E-28    |
| AC124312.5 | 3.761218303 | 1.705030134 | -1.141402807 | 5.38E-26    | 3.20E-25    |
| PPIAP53    | 0.34722864  | 0.793384634 | 1.192134507  | 1.52E-11    | 3.21E-11    |
| AC093110.1 | 0.407161811 | 1.089928141 | 1.420558862  | 1.34E-13    | 3.21E-13    |
| GK-AS1     | 0.18814117  | 0.639210314 | 1.764475109  | 2.78E-14    | 6.96E-14    |
| DPP6       | 1.305551346 | 0.131778975 | -3.308467081 | 6.18E-33    | 8.69E-32    |
| LDHAP4     | 1.612061846 | 4.581599986 | 1.506944411  | 2.42E-17    | 7.39E-17    |
| FAM220CP   | 0.510819982 | 0.185548202 | -1.461020942 | 0.000675886 | 0.000878592 |
| RPS19      | 72.31161458 | 194.8100333 | 1.429768688  | 2.36E-35    | 5.57E-34    |
| PRKD1      | 8.566402708 | 4.184863745 | -1.033508849 | 3.98E-31    | 4.11E-30    |
| AP001148.1 | 1.171779296 | 0.575731105 | -1.0252338   | 8.79E-25    | 4.71E-24    |
| AP002954.1 | 0.107101301 | 0.779962553 | 2.864428852  | 1.54E-24    | 8.07E-24    |
| IGHGP      | 4.404423918 | 22.86642407 | 2.376205532  | 2.81E-06    | 4.29E-06    |
| AC010680.4 | 0.109834749 | 0.328268772 | 1.579542957  | 1.29E-10    | 2.57E-10    |
| AC010240.2 | 0.104761453 | 0.278495293 | 1.410544969  | 0.000264042 | 0.000353226 |
| LGALS1     | 59.06596569 | 252.1866685 | 2.09409303   | 3.70E-34    | 6.63E-33    |
| RPS11P5    | 0.959456965 | 1.934884773 | 1.01195765   | 2.29E-18    | 7.50E-18    |
| AC027601.1 | 0.052105447 | 0.28295912  | 2.441087541  | 1.49E-24    | 7.85E-24    |
| RSPO3      | 2.295701982 | 0.89682058  | -1.35604408  | 1.68E-15    | 4.55E-15    |
| NCBP2-AS1  | 0.067544097 | 0.234796234 | 1.797507666  | 5.07E-14    | 1.25E-13    |
| KMT5C      | 0.617078629 | 1.503385227 | 1.284688495  | 1.70E-24    | 8.89E-24    |
| CCDC160    | 4.88782461  | 0.94864699  | -2.365249281 | 1.97E-37    | 9.30E-36    |
| AL096712.1 | 0.059367579 | 0.252821631 | 2.090372708  | 0.000411272 | 0.000542565 |
| SDHAP1     | 1.284660964 | 3.27369155  | 1.34953073   | 2.73E-15    | 7.31E-15    |
| AC018804.1 | 0.118054274 | 0.476517166 | 2.013077917  | 2.14E-11    | 4.47E-11    |
| AC092119.2 | 0.153225191 | 0.659499182 | 2.10571737   | 8.33E-15    | 2.15E-14    |
| AL157394.1 | 0.378047322 | 1.050794883 | 1.474842339  | 6.14E-29    | 4.85E-28    |
| RND2       | 1.044272865 | 0.513228335 | -1.024826006 | 4.54E-23    | 2.11E-22    |
| AL359075.1 | 0.149573527 | 0.38383898  | 1.359646373  | 7.37E-05    | 0.000102296 |
| AC104046.1 | 0.074177068 | 0.250893757 | 1.758031418  | 5.06E-11    | 1.03E-10    |
| AL035405.1 | 0.026875136 | 0.274541183 | 3.352678622  | 0.001970605 | 0.002478819 |
| TCTEX1D4   | 0.126088543 | 0.268279875 | 1.089301642  | 3.91E-09    | 7.12E-09    |
| SLC17A4    | 0.937143787 | 12.5323201  | 3.741239295  | 9.89E-21    | 3.84E-20    |
| 1-Mar      | 0.712775113 | 2.191787105 | 1.620588802  | 1.33E-22    | 5.95E-22    |
| SEC14L1P1  | 0.206899766 | 0.42635942  | 1.043138119  | 5.44E-18    | 1.73E-17    |

Table S1. The differentially expressed genes(DEGs) were screened out in TCGA

| ID         | conMean     | treatMean   | logFC        | pValue      | FDR         |
|------------|-------------|-------------|--------------|-------------|-------------|
| AC009084.1 | 0.064694354 | 2.012670838 | 4.959327615  | 1.71E-26    | 1.06E-25    |
| GABRP      | 2.220298322 | 0.482186992 | -2.203088894 | 3.31E-29    | 2.69E-28    |
| CPEB3      | 3.246758369 | 1.293468214 | -1.327755419 | 1.74E-34    | 3.34E-33    |
| PDE1B      | 0.777354383 | 2.45399052  | 1.658485321  | 3.03E-28    | 2.21E-27    |
| LINC02568  | 1.679222575 | 0.177566721 | -3.241360339 | 6.99E-38    | 3.89E-36    |
| AL360091.1 | 0.128205817 | 0.319316424 | 1.316525041  | 8.21E-05    | 0.000113502 |
| AC010480.1 | 0.013211619 | 0.268645435 | 4.345824127  | 1.94E-07    | 3.18E-07    |
| AL138787.2 | 0.087626931 | 0.23796214  | 1.441285826  | 6.37E-07    | 1.01E-06    |
| RNA5SP37   | 0.413256671 | 0.855860018 | 1.050336743  | 1.10E-05    | 1.61E-05    |
| LRRC4B     | 0.529021099 | 1.069738782 | 1.015861382  | 2.08E-11    | 4.35E-11    |
| ANGPT2     | 2.2648326   | 19.27621162 | 3.089345219  | 9.42E-36    | 2.50E-34    |
| SNORA28    | 0.13995554  | 1.242826388 | 3.150584279  | 0.000154848 | 0.00021036  |
| FATE1      | 0.164149668 | 1.919932372 | 3.547971753  | 1.20E-37    | 6.14E-36    |
| DSCC1      | 0.594283    | 1.191201707 | 1.00319571   | 6.50E-25    | 3.51E-24    |
| AC010615.2 | 0.102957282 | 0.28510723  | 1.469458754  | 1.84E-20    | 7.02E-20    |
| F2RL3      | 1.866981751 | 9.903045003 | 2.407164369  | 4.80E-22    | 2.06E-21    |
| NADSYN1    | 1.993024972 | 4.211279179 | 1.079298732  | 1.29E-33    | 2.06E-32    |
| TEX41      | 0.328871483 | 0.857510939 | 1.382631161  | 0.000921537 | 0.001188239 |
| AC096541.1 | 0.132821227 | 0.50128275  | 1.916138863  | 2.46E-24    | 1.27E-23    |
| IGKV1-6    | 3.616319605 | 13.51034496 | 1.90147042   | 0.000454082 | 0.000597166 |
| LRRC39     | 0.199670994 | 0.867277457 | 2.118868844  | 7.73E-22    | 3.27E-21    |
| ECI2       | 30.015659   | 14.56816692 | -1.042895985 | 2.68E-30    | 2.48E-29    |
| SNAP25     | 0.645310559 | 2.606078364 | 2.013814929  | 2.12E-19    | 7.48E-19    |
| SNX33      | 5.5353615   | 14.05979369 | 1.344825981  | 1.66E-34    | 3.19E-33    |
| NAPEPLD    | 8.277413306 | 3.729551504 | -1.150177845 | 8.64E-35    | 1.78E-33    |
| AL136528.1 | 0.040002573 | 0.366775542 | 3.196732726  | 1.62E-15    | 4.40E-15    |
| Z84484.1   | 0.129546329 | 0.455585185 | 1.814252696  | 5.74E-19    | 1.96E-18    |
| IGHV1OR21- | 0.076519418 | 0.391076033 | 2.353551311  | 0.026750421 | 0.030839829 |
| BNIP3P22   | 0.053897708 | 0.54748761  | 3.344530485  | 4.22E-13    | 9.83E-13    |
| AP001160.1 | 0.194224708 | 0.655605872 | 1.755102036  | 4.58E-16    | 1.29E-15    |
| PDIA2      | 0.03504275  | 0.332661282 | 3.246866049  | 0.00505491  | 0.006164218 |
| SLC26A4    | 3.11408057  | 0.318452459 | -3.289656354 | 1.36E-11    | 2.88E-11    |
| AL360181.2 | 0.624783126 | 2.160390777 | 1.7898649    | 2.09E-18    | 6.85E-18    |
| GLIS1      | 1.138620787 | 4.359423592 | 1.936850049  | 1.83E-24    | 9.55E-24    |
| MRO        | 6.735794965 | 0.91192082  | -2.884867756 | 4.83E-20    | 1.79E-19    |
| RPS15AP1   | 1.551451488 | 3.112718314 | 1.00455644   | 1.13E-16    | 3.30E-16    |
| LRRC43     | 1.262936783 | 0.449585923 | -1.490113656 | 2.88E-30    | 2.66E-29    |
| EP400P1    | 0.333783281 | 0.699528111 | 1.06747034   | 1.81E-11    | 3.81E-11    |
| RNU6-623P  | 0.076443899 | 0.35260354  | 2.205573679  | 1.91E-11    | 4.01E-11    |
| AL031658.1 | 0.081078745 | 0.291021863 | 1.843731877  | 1.25E-13    | 3.00E-13    |
| AL109615.2 | 0.013303012 | 0.393285501 | 4.885752198  | 2.58E-33    | 3.88E-32    |
| LYPD8      | 1.189275474 | 0.440668566 | -1.432317032 | 9.52E-23    | 4.31E-22    |
| CLCNKB     | 102.1311302 | 8.54066354  | -3.579930706 | 8.32E-38    | 4.52E-36    |
| RPL17P34   | 0.118132588 | 0.252009673 | 1.09307211   | 1.24E-10    | 2.48E-10    |
| AC105020.5 | 0.289827802 | 1.055407806 | 1.864532659  | 2.15E-21    | 8.81E-21    |
| LINC00475  | 0.058809384 | 0.796684891 | 3.759890921  | 3.25E-33    | 4.81E-32    |
| AC006160.1 | 0.112001637 | 0.393050196 | 1.811193751  | 1.99E-17    | 6.11E-17    |
| AC073218.1 | 1.673591173 | 16.69444367 | 3.318348965  | 1.78E-29    | 1.49E-28    |
| AL033397.2 | 0.065993166 | 0.291547895 | 2.143344378  | 7.60E-18    | 2.40E-17    |
| PLA2G4A    | 6.517388921 | 2.156617862 | -1.595523526 | 8.22E-26    | 4.81E-25    |
| FGFBP1     | 0.808438407 | 0.129361457 | -2.64373003  | 2.90E-39    | 2.80E-37    |
| AL080317.1 | 1.512871275 | 10.98623205 | 2.860335526  | 1.87E-30    | 1.77E-29    |
| PLAG1      | 0.776258156 | 0.245020357 | -1.663634903 | 1.43E-33    | 2.26E-32    |
| AC111000.2 | 2.205802839 | 9.93726236  | 2.171544611  | 2.70E-15    | 7.22E-15    |
| CBFA2T3    | 0.342484748 | 0.719063949 | 1.070080339  | 1.55E-15    | 4.21E-15    |

Table S1. The differentially expressed genes(DEGs) were screened out in TCGA

| ID         | conMean     | treatMean   | logFC        | pValue      | FDR         |
|------------|-------------|-------------|--------------|-------------|-------------|
| P2RY12     | 0.478947898 | 1.637549988 | 1.773598319  | 3.12E-17    | 9.48E-17    |
| HIGD1B     | 2.076005817 | 6.529603948 | 1.653185002  | 2.31E-18    | 7.55E-18    |
| HDAC11     | 9.083866431 | 4.278490318 | -1.086204667 | 1.38E-29    | 1.17E-28    |
| TRIM36     | 0.162370509 | 0.394504827 | 1.28075333   | 2.24E-21    | 9.16E-21    |
| AL354751.2 | 0.011080791 | 0.284266973 | 4.681113772  | 5.95E-17    | 1.77E-16    |
| PDGFD      | 6.480145444 | 24.03746681 | 1.891186766  | 1.07E-23    | 5.23E-23    |
| HOXD1      | 0.936789015 | 0.410660962 | -1.189776349 | 1.42E-24    | 7.47E-24    |
| SLC48A1    | 18.46886875 | 6.686247807 | -1.465826771 | 2.89E-39    | 2.80E-37    |
| AC007326.1 | 0.045200322 | 5.410881725 | 6.903386843  | 1.68E-37    | 8.15E-36    |
| PAEP       | 0.010618538 | 6.658253526 | 9.292414907  | 2.82E-13    | 6.64E-13    |
| UBA52P5    | 0.191854102 | 0.553214852 | 1.527830275  | 7.74E-13    | 1.77E-12    |
| SNORD124   | 0.107708433 | 0.583803879 | 2.438352584  | 2.88E-14    | 7.20E-14    |
| MIR1302-3  | 0.225390879 | 0.460290774 | 1.030116393  | 0.009432898 | 0.011276536 |
| RPL9P18    | 0.126469896 | 0.256815733 | 1.021939569  | 1.47E-08    | 2.59E-08    |
| GABRQ      | 0.17993072  | 0.488755025 | 1.441670018  | 2.10E-14    | 5.29E-14    |
| AC007016.1 | 0.059794261 | 0.393515102 | 2.71834008   | 6.23E-19    | 2.12E-18    |
| RPL18      | 68.24917944 | 147.9483398 | 1.116209902  | 1.91E-31    | 2.07E-30    |
| SFTA1P     | 0.055659013 | 1.74793422  | 4.972891763  | 5.13E-40    | 7.48E-38    |
| ACPP       | 12.7747708  | 0.272862307 | -5.54898048  | 3.10E-42    | 1.36E-39    |
| ICAM3      | 0.250033743 | 1.014098726 | 2.020003403  | 5.31E-28    | 3.77E-27    |
| RUBCNL     | 0.258648188 | 0.74376568  | 1.523857094  | 2.66E-21    | 1.08E-20    |
| CIITA      | 1.230969225 | 3.498989709 | 1.507143727  | 2.29E-21    | 9.35E-21    |
| TSPYL5     | 12.62530863 | 4.062507463 | -1.635876286 | 2.32E-31    | 2.48E-30    |
| ABCA8      | 2.512803188 | 0.663691116 | -1.92071381  | 1.07E-19    | 3.86E-19    |
| BICDL1     | 29.6328196  | 7.271615195 | -2.026848146 | 1.33E-32    | 1.77E-31    |
| AL596325.2 | 0.317326248 | 0.875754048 | 1.46455889   | 8.41E-09    | 1.50E-08    |
| AL031777.1 | 0.107208707 | 0.403054286 | 1.910552081  | 1.78E-11    | 3.74E-11    |
| CHL1       | 6.325989149 | 0.617426192 | -3.35695249  | 1.08E-39    | 1.34E-37    |
| RNA5SP25   | 0.030514588 | 0.331795965 | 3.442725329  | 2.57E-08    | 4.45E-08    |
| LINC02535  | 2.784083629 | 0.99265732  | -1.487834878 | 0.000396608 | 0.000523796 |
| POU5F1     | 1.138772681 | 12.5255037  | 3.459316929  | 2.74E-35    | 6.40E-34    |
| AC007490.1 | 1.750346536 | 0.577197223 | -1.600504313 | 4.64E-28    | 3.32E-27    |
| ARHGAP22   | 0.187419152 | 1.230492509 | 2.714895583  | 2.16E-38    | 1.45E-36    |
| AIF1L      | 235.4903638 | 25.14391291 | -3.227386941 | 1.85E-40    | 3.40E-38    |
| SNX20      | 0.342532793 | 1.902300351 | 2.473431029  | 2.11E-31    | 2.27E-30    |
| TSPAN33    | 77.48068181 | 25.92135175 | -1.579695695 | 5.68E-33    | 8.03E-32    |
| AC104837.2 | 0.02900484  | 0.237613179 | 3.0342493    | 3.06E-17    | 9.30E-17    |
| FMO5       | 7.16317225  | 1.359321053 | -2.397712393 | 1.80E-37    | 8.69E-36    |
| AP002761.4 | 0.838323701 | 0.34021073  | -1.301078774 | 3.62E-23    | 1.69E-22    |
| INSRR      | 1.049377112 | 0.086549548 | -3.59986314  | 2.06E-31    | 2.22E-30    |
| IGHV3-64   | 0.367105422 | 2.127335659 | 2.534781359  | 8.66E-06    | 1.28E-05    |
| TNNI1      | 1.875642287 | 0.119198764 | -3.975943533 | 1.71E-39    | 1.90E-37    |
| YBX3       | 12.44101939 | 35.18160207 | 1.499716479  | 6.36E-36    | 1.77E-34    |
| AC243562.1 | 0.107661392 | 0.219705857 | 1.029072344  | 0.00236882  | 0.002961816 |
| LINC01159  | 2.26319711  | 0.447639246 | -2.337953807 | 1.28E-31    | 1.42E-30    |
| CNDP1      | 0.5200034   | 0.231286482 | -1.16884011  | 1.94E-10    | 3.81E-10    |
| GPR85      | 0.203972361 | 0.567073716 | 1.475162613  | 1.08E-19    | 3.91E-19    |
| RASSF10    | 3.562484723 | 0.418156987 | -3.090767252 | 1.32E-38    | 9.64E-37    |
| AC099343.2 | 0.198281827 | 0.426932124 | 1.106454264  | 0.002173948 | 0.002724946 |
| AC124944.2 | 0.107699309 | 0.818837219 | 2.926567687  | 2.21E-25    | 1.24E-24    |
| RNU6-1005P | 0.094249676 | 0.392754078 | 2.059066693  | 1.38E-08    | 2.43E-08    |
| NTNG1      | 1.948527505 | 0.09022643  | -4.432690382 | 8.71E-33    | 1.19E-31    |
| CLEC4A     | 1.019567549 | 3.370871741 | 1.725164375  | 2.33E-30    | 2.17E-29    |
| MIR4677    | 0.090377385 | 0.399194349 | 2.143057584  | 1.43E-08    | 2.51E-08    |
| IL15       | 0.639172143 | 1.312437882 | 1.037972703  | 4.94E-23    | 2.29E-22    |

Table S1. The differentially expressed genes(DEGs) were screened out in TCGA

| ID         | conMean     | treatMean   | logFC        | pValue      | FDR         |
|------------|-------------|-------------|--------------|-------------|-------------|
| CXXC4      | 0.403872228 | 0.84019481  | 1.056824931  | 2.70E-08    | 4.68E-08    |
| AC008033.3 | 0.134335614 | 0.963922257 | 2.843074965  | 1.73E-16    | 5.00E-16    |
| RNU1-106P  | 0.08387602  | 1.43105331  | 4.092675203  | 4.90E-38    | 2.92E-36    |
| RN7SKP70   | 0.440695764 | 1.528459802 | 1.794223674  | 2.31E-17    | 7.08E-17    |
| ZBTB40-IT1 | 0.110619764 | 0.368959642 | 1.737853841  | 8.30E-13    | 1.90E-12    |
| SLC34A1    | 38.70892885 | 1.961465431 | -4.302662571 | 3.35E-14    | 8.34E-14    |
| PRPH2      | 0.658782775 | 0.280344736 | -1.232600851 | 2.20E-23    | 1.05E-22    |
| AC112243.1 | 2.510130556 | 0.00456142  | -9.104063777 | 2.89E-57    | 7.44E-54    |
| HLA-DRB5   | 82.19951569 | 212.7735843 | 1.372117253  | 1.20E-14    | 3.07E-14    |
| SRGAP3     | 1.62807294  | 0.296547477 | -2.456830332 | 1.92E-38    | 1.31E-36    |
| AL137847.1 | 1.070414007 | 0.494232317 | -1.114907646 | 6.19E-23    | 2.85E-22    |
| AC007365.1 | 0.194745243 | 0.408367477 | 1.068279889  | 7.43E-12    | 1.60E-11    |
| AC009704.2 | 0.150205429 | 0.940764571 | 2.646896768  | 1.69E-20    | 6.47E-20    |
| OXGR1      | 2.743162946 | 0.375384016 | -2.869401197 | 9.61E-37    | 3.54E-35    |
| RNA5SP39   | 0.087777898 | 0.342041206 | 1.962240512  | 9.95E-08    | 1.66E-07    |
| LNC SRLR   | 0.26932953  | 1.394997038 | 2.372817735  | 1.37E-27    | 9.33E-27    |
| NPIP4      | 0.102648719 | 0.427041755 | 2.056661514  | 2.56E-26    | 1.57E-25    |
| PKHD1      | 9.156717458 | 4.03398231  | -1.18262575  | 2.80E-26    | 1.71E-25    |
| AL137026.1 | 0.062430838 | 0.473538851 | 2.923152049  | 2.90E-09    | 5.33E-09    |
| AC116407.2 | 0.225808339 | 0.84806892  | 1.909082748  | 2.59E-24    | 1.33E-23    |
| HSD3B7     | 6.777910042 | 31.08186301 | 2.197160585  | 9.71E-32    | 1.10E-30    |
| AL357874.1 | 0.067580107 | 0.228662368 | 1.758548421  | 2.96E-18    | 9.61E-18    |
| CTSE       | 0.268338036 | 1.576072224 | 2.554210179  | 4.03E-07    | 6.47E-07    |
| GATA2      | 9.248065569 | 3.141012732 | -1.557921836 | 2.79E-30    | 2.58E-29    |
| COL5A1     | 3.042497317 | 12.15200668 | 1.997866672  | 2.37E-18    | 7.74E-18    |
| SLC8A1     | 4.233672193 | 1.735050851 | -1.286931622 | 1.47E-06    | 2.28E-06    |
| PAIP1P1    | 0.099654756 | 0.353393898 | 1.82626657   | 1.30E-16    | 3.78E-16    |
| LINC00942  | 0.035330316 | 0.551311682 | 3.963889617  | 0.009517375 | 0.011375542 |
| AC098934.1 | 1.56642688  | 0.336224979 | -2.219978613 | 2.29E-15    | 6.15E-15    |
| NPEPL1     | 1.134531339 | 3.173114866 | 1.483803287  | 1.90E-20    | 7.24E-20    |
| GCGR       | 5.430422043 | 0.7829299   | -2.79410928  | 2.20E-36    | 6.96E-35    |
| TREM1      | 0.2352162   | 1.03368845  | 2.135742099  | 3.77E-17    | 1.14E-16    |
| AC118755.1 | 0.035304736 | 0.340843746 | 3.271176879  | 1.21E-05    | 1.76E-05    |
| AC011297.1 | 2.367640214 | 0.196664734 | -3.589639682 | 2.49E-14    | 6.25E-14    |
| ARHGAP26   | 2.184870306 | 4.630859985 | 1.083732494  | 8.75E-24    | 4.29E-23    |
| TMEM52B    | 64.95063176 | 1.942802689 | -5.063132265 | 4.86E-36    | 1.39E-34    |
| CDKL1      | 3.044271851 | 1.058873901 | -1.523566404 | 7.00E-32    | 8.15E-31    |
| AL513008.1 | 0.042307088 | 0.424146007 | 3.32558969   | 1.59E-11    | 3.34E-11    |
| REG1A      | 5.419557857 | 37.31737496 | 2.783600443  | 2.82E-10    | 5.51E-10    |
| AL365356.4 | 0.085151695 | 0.766997604 | 3.171114923  | 3.05E-32    | 3.76E-31    |
| RPLP0P2    | 0.501794691 | 0.182038315 | -1.46285507  | 6.26E-17    | 1.86E-16    |
| LRR37A6P   | 1.007007514 | 0.234723356 | -2.101041138 | 1.16E-33    | 1.87E-32    |
| MAP3K14    | 2.977203307 | 7.857882948 | 1.400182934  | 1.32E-26    | 8.24E-26    |
| NCF2       | 2.062473179 | 6.994414958 | 1.761828031  | 8.44E-28    | 5.86E-27    |
| MIR4701    | 0.224520956 | 0.768787907 | 1.775735539  | 4.75E-07    | 7.60E-07    |
| MAL        | 329.7434364 | 29.54487768 | -3.480364011 | 1.91E-39    | 2.03E-37    |
| PITPNM3    | 0.833350431 | 0.306625001 | -1.442447954 | 1.96E-27    | 1.31E-26    |
| ARRB2      | 5.009289611 | 14.29244323 | 1.512574632  | 6.92E-40    | 9.19E-38    |
| AL136380.1 | 0.1362943   | 0.803176303 | 2.558991476  | 1.53E-17    | 4.74E-17    |
| LINC02432  | 1.300241627 | 0.18074666  | -2.846738854 | 4.60E-34    | 8.05E-33    |
| AC084117.1 | 0.236447428 | 2.19738922  | 3.216199081  | 2.69E-27    | 1.79E-26    |
| FTCD       | 20.1618415  | 9.054115931 | -1.15498173  | 7.69E-05    | 0.000106559 |
| TMEM74B    | 0.221149585 | 2.937309341 | 3.731400768  | 8.63E-41    | 2.02E-38    |
| TMEM92     | 0.430332932 | 2.821656251 | 2.713017087  | 2.97E-16    | 8.44E-16    |
| DNAJB13    | 0.087978912 | 1.182662321 | 3.748736642  | 4.92E-18    | 1.57E-17    |

Table S1. The differentially expressed genes(DEGs) were screened out in TCGA

| ID         | conMean     | treatMean   | logFC        | pValue      | FDR         |
|------------|-------------|-------------|--------------|-------------|-------------|
| PDGFRL     | 0.789984438 | 1.8177989   | 1.202296467  | 0.001513956 | 0.001922964 |
| CMTM3      | 5.356410861 | 15.09815297 | 1.495033537  | 1.47E-29    | 1.24E-28    |
| AC026369.3 | 0.028990475 | 0.419224266 | 3.854071335  | 1.62E-28    | 1.22E-27    |
| AC078906.1 | 0.016378799 | 0.341561031 | 4.382241881  | 5.99E-32    | 7.07E-31    |
| CCND2      | 4.796099144 | 10.94468323 | 1.190296812  | 1.74E-19    | 6.19E-19    |
| SULT1C2P2  | 0.074004006 | 0.25183722  | 1.766816253  | 1.42E-05    | 2.06E-05    |
| TACC3      | 1.065821556 | 2.898830202 | 1.443504914  | 3.01E-29    | 2.46E-28    |
| LINC01014  | 0.576123304 | 0.166149918 | -1.793892037 | 7.05E-25    | 3.80E-24    |
| RAC2       | 4.125681333 | 17.26656379 | 2.065276704  | 3.53E-29    | 2.86E-28    |
| GNGT1      | 0.128110243 | 0.613884308 | 2.260580965  | 2.64E-05    | 3.77E-05    |
| SELP       | 7.175079697 | 3.318397114 | -1.112508312 | 5.64E-21    | 2.23E-20    |
| EIF3KP1    | 0.16355123  | 0.361919573 | 1.145926525  | 2.09E-08    | 3.65E-08    |
| AL161719.1 | 0.753366417 | 0.191812089 | -1.973658076 | 2.93E-19    | 1.02E-18    |
| AC005253.1 | 0.241345153 | 0.82706465  | 1.776902254  | 4.04E-20    | 1.50E-19    |
| DNM1       | 1.331132006 | 3.704657155 | 1.476686388  | 1.22E-11    | 2.59E-11    |
| RAP2B      | 4.460961625 | 10.1787358  | 1.190131747  | 2.09E-30    | 1.97E-29    |
| AL355803.1 | 0.97642176  | 2.494071213 | 1.352926307  | 2.59E-16    | 7.39E-16    |
| AL354836.1 | 1.377484261 | 4.828557104 | 1.809556304  | 5.64E-18    | 1.80E-17    |
| GBP2       | 6.270769403 | 24.73639289 | 1.979920766  | 9.52E-35    | 1.94E-33    |
| AC007406.1 | 0.398160096 | 1.270501995 | 1.673978097  | 2.41E-05    | 3.46E-05    |
| GGT6       | 29.37386549 | 0.964887929 | -4.928027937 | 3.39E-40    | 5.29E-38    |
| AC009120.3 | 0.490426906 | 1.394818293 | 1.507967155  | 1.20E-12    | 2.71E-12    |
| TMEM238L   | 6.459414075 | 0.046910823 | -7.105338689 | 4.59E-41    | 1.23E-38    |
| SYN2       | 0.660790483 | 0.138703664 | -2.252187015 | 1.15E-26    | 7.21E-26    |
| NEDD4L     | 13.27887514 | 6.341286256 | -1.066285531 | 4.40E-32    | 5.27E-31    |
| GP6        | 0.066037686 | 0.314418408 | 2.251324202  | 7.95E-21    | 3.11E-20    |
| GPBAR1     | 1.869285747 | 0.574612455 | -1.701825952 | 7.98E-06    | 1.18E-05    |
| TRAV1-1    | 0.037999211 | 0.228868729 | 2.590478984  | 7.94E-14    | 1.93E-13    |
| NOTCH4     | 4.496523375 | 13.7228948  | 1.609702972  | 4.29E-23    | 2.00E-22    |
| AL137784.2 | 0.129461135 | 0.28759737  | 1.151531426  | 1.66E-10    | 3.29E-10    |
| ST6GAL1    | 62.30450014 | 13.3692088  | -2.220422282 | 5.32E-37    | 2.16E-35    |
| OPHN1      | 3.431152375 | 1.086067134 | -1.659579912 | 9.86E-37    | 3.61E-35    |
| RN7SL521P  | 0.140917267 | 0.416038009 | 1.561866934  | 0.001034527 | 0.001329266 |
| LINC02446  | 0.0577345   | 0.658960558 | 3.512686529  | 6.62E-28    | 4.66E-27    |
| AP000873.4 | 0.13111748  | 0.506492122 | 1.949679793  | 4.73E-18    | 1.51E-17    |
| IGLV2-18   | 1.164087098 | 5.19661036  | 2.158371884  | 6.29E-05    | 8.76E-05    |
| AP002518.2 | 0.03086171  | 0.2307015   | 2.902137473  | 7.59E-12    | 1.63E-11    |
| BMP8A      | 0.213770845 | 0.581148867 | 1.442842664  | 3.12E-15    | 8.30E-15    |
| UBE2CP2    | 0.127933602 | 0.338817309 | 1.405112339  | 3.71E-13    | 8.66E-13    |
| FHOD3      | 8.254974528 | 3.482104278 | -1.245304356 | 2.56E-32    | 3.23E-31    |
| MLKL       | 1.190642764 | 4.617439406 | 1.955352412  | 3.94E-37    | 1.67E-35    |
| CXorf21    | 0.672212811 | 2.154950442 | 1.680664749  | 7.91E-24    | 3.90E-23    |
| FANCI      | 0.739965921 | 1.814149772 | 1.293762832  | 1.75E-31    | 1.90E-30    |
| CEBPA      | 1.50495391  | 4.269424801 | 1.504322411  | 1.49E-18    | 4.95E-18    |
| LRFN1      | 0.263529652 | 0.605289303 | 1.199659555  | 1.73E-21    | 7.13E-21    |
| AC005393.1 | 0.201999569 | 0.436024734 | 1.110057764  | 4.26E-09    | 7.74E-09    |
| ESRP1      | 7.651884918 | 0.827468709 | -3.209038514 | 1.72E-36    | 5.66E-35    |
| PLD4       | 0.382278107 | 1.878126168 | 2.296599498  | 7.56E-29    | 5.89E-28    |
| RNU6-1165P | 0.199747332 | 0.588708759 | 1.559377859  | 2.50E-08    | 4.33E-08    |
| FOLH1      | 3.650400113 | 7.396661172 | 1.018819587  | 2.73E-11    | 5.66E-11    |
| XKR9       | 0.184435708 | 0.406128732 | 1.138819096  | 1.69E-06    | 2.61E-06    |
| MIR548AN   | 0.081081994 | 0.693958818 | 3.09739657   | 5.78E-17    | 1.72E-16    |
| ZNF90      | 0.410863332 | 0.855399356 | 1.05793954   | 5.72E-08    | 9.69E-08    |
| TMC4       | 26.97228763 | 6.029732434 | -2.161311997 | 1.48E-32    | 1.95E-31    |
| MEIS3      | 0.561016217 | 1.495021549 | 1.4140519    | 4.68E-19    | 1.61E-18    |

Table S1. The differentially expressed genes(DEGs) were screened out in TCGA

| ID         | conMean     | treatMean   | logFC        | pValue      | FDR         |
|------------|-------------|-------------|--------------|-------------|-------------|
| BCAT1      | 0.887504932 | 2.402357403 | 1.436623758  | 1.69E-17    | 5.23E-17    |
| AC009159.2 | 0.089243674 | 0.732248935 | 3.036512374  | 8.60E-28    | 5.97E-27    |
| RNA5SP40   | 0.04927061  | 0.63292346  | 3.683231808  | 2.72E-10    | 5.30E-10    |
| AC008735.2 | 0.60931559  | 3.237210055 | 2.409489424  | 7.61E-20    | 2.78E-19    |
| RNU5B-4P   | 0.554499381 | 1.261793643 | 1.186218234  | 5.14E-12    | 1.12E-11    |
| LINC00426  | 0.065963634 | 0.407551855 | 2.627240844  | 6.09E-28    | 4.30E-27    |
| IGKV6D-21  | 0.40939284  | 1.818111987 | 2.15088329   | 0.001771069 | 0.002235608 |
| APCDD1L-D1 | 1.075267417 | 0.332487014 | -1.693325601 | 1.02E-32    | 1.39E-31    |
| SEPT4      | 2.167871206 | 4.889803678 | 1.173497495  | 1.55E-18    | 5.14E-18    |
| NPHS2      | 70.15892911 | 0.552262563 | -6.989128583 | 5.62E-27    | 3.62E-26    |
| RASA3      | 3.363749694 | 9.005959812 | 1.420809685  | 2.32E-31    | 2.48E-30    |
| AC132938.5 | 0.093328151 | 0.379528953 | 2.023825734  | 1.30E-15    | 3.56E-15    |
| AC104699.1 | 0.05716606  | 0.29767485  | 2.380506583  | 1.75E-08    | 3.06E-08    |
| ENOX1      | 2.132766885 | 0.588526596 | -1.857546766 | 5.22E-26    | 3.11E-25    |
| EPN3       | 5.188636457 | 0.331475622 | -3.968380778 | 2.56E-39    | 2.58E-37    |
| SEMA3F     | 11.20445658 | 24.62551571 | 1.136081258  | 6.10E-24    | 3.04E-23    |
| GAS5       | 14.87308425 | 48.29328388 | 1.699118716  | 7.95E-34    | 1.33E-32    |
| MELTF      | 7.190304461 | 1.172231897 | -2.616794861 | 1.96E-13    | 4.65E-13    |
| S100A2     | 44.94602435 | 3.644959574 | -3.62421879  | 4.13E-39    | 3.64E-37    |
| FAM124A    | 2.279548493 | 1.056733526 | -1.109136478 | 1.30E-33    | 2.07E-32    |
| PSTPIP1    | 0.267624642 | 1.873409795 | 2.807383647  | 8.31E-34    | 1.39E-32    |
| AL365330.1 | 0.731326394 | 1.494122578 | 1.030711175  | 8.46E-11    | 1.70E-10    |
| TNFRSF18   | 0.155185162 | 1.163310576 | 2.906173788  | 2.65E-32    | 3.32E-31    |
| GTF2IP9    | 0.33922041  | 0.691288415 | 1.027064774  | 5.28E-06    | 7.91E-06    |
| TUBAL3     | 2.369958628 | 0.162240092 | -3.868659597 | 3.17E-27    | 2.09E-26    |
| CYP4B1     | 0.883420445 | 0.298382399 | -1.565937787 | 6.80E-18    | 2.15E-17    |
| ZNF204P    | 9.887552153 | 4.534189526 | -1.124768703 | 4.63E-27    | 3.01E-26    |
| DGCR10     | 0.155184998 | 1.988954659 | 3.679949391  | 7.53E-35    | 1.58E-33    |
| AC253536.3 | 0.40278369  | 0.844068359 | 1.06735458   | 0.000392266 | 0.000518156 |
| AC093908.1 | 0.106874047 | 0.431701506 | 2.014122566  | 2.51E-28    | 1.85E-27    |
| ARHGAP15   | 0.680641636 | 2.127802768 | 1.644397118  | 4.05E-29    | 3.26E-28    |
| ALG13-AS1  | 0.229273251 | 1.059664213 | 2.20846722   | 3.30E-21    | 1.33E-20    |
| AC083967.1 | 0.011282092 | 0.610006114 | 5.756717163  | 3.79E-29    | 3.05E-28    |
| Z98257.1   | 0.009198857 | 0.225992518 | 4.618676608  | 1.38E-19    | 4.94E-19    |
| SLAMF1     | 0.249723053 | 0.722332122 | 1.53233332   | 1.17E-17    | 3.65E-17    |
| ARHGEF38   | 1.129058856 | 0.41547599  | -1.442283683 | 3.17E-27    | 2.09E-26    |
| AC004837.2 | 0.080245995 | 0.270365897 | 1.752411882  | 1.10E-12    | 2.50E-12    |
| CD200R1    | 0.227560597 | 1.144087666 | 2.329874925  | 1.09E-22    | 4.92E-22    |
| AC135048.4 | 0.154308769 | 1.205756734 | 2.966046909  | 1.22E-33    | 1.95E-32    |
| DMRT2      | 11.78343835 | 3.130501005 | -1.912295102 | 1.40E-35    | 3.53E-34    |
| CLEC17A    | 0.080542217 | 0.234000124 | 1.538692216  | 5.32E-11    | 1.08E-10    |
| SLC31A1P1  | 0.10344062  | 0.228725314 | 1.144813219  | 0.000119986 | 0.000164182 |
| COL4A5     | 6.233219764 | 1.269149205 | -2.296115892 | 3.94E-39    | 3.51E-37    |
| LINC00284  | 2.061569184 | 0.335522709 | -2.619260557 | 4.86E-33    | 7.00E-32    |
| MYH14      | 9.389518944 | 2.638070607 | -1.831568067 | 3.28E-32    | 4.02E-31    |
| DDX39BP1   | 0.061970447 | 0.277506452 | 2.162869031  | 2.44E-11    | 5.08E-11    |
| PIP4K2C    | 32.97064292 | 12.32394639 | -1.419717708 | 1.01E-40    | 2.23E-38    |
| AP001107.4 | 0.200963108 | 0.762355744 | 1.923533694  | 5.62E-13    | 1.30E-12    |
| RNA5SP298  | 0.079860484 | 0.375795519 | 2.234394149  | 2.64E-10    | 5.16E-10    |
| AC093724.1 | 0.697388461 | 1.421040974 | 1.026913754  | 5.63E-12    | 1.22E-11    |
| MFSD3      | 11.96106775 | 5.551290562 | -1.10745107  | 5.66E-27    | 3.65E-26    |
| AC012404.2 | 0.034536514 | 0.49043401  | 3.827864671  | 2.12E-13    | 5.03E-13    |
| PCDHB14    | 1.168998431 | 3.112251861 | 1.412685823  | 1.15E-22    | 5.19E-22    |
| AL035071.2 | 0.128561259 | 0.2689395   | 1.064825698  | 0.002466291 | 0.0030792   |
| MB         | 0.109955377 | 0.235326235 | 1.097744011  | 0.018615508 | 0.021736494 |

Table S1. The differentially expressed genes(DEGs) were screened out in TCGA

| ID         | conMean     | treatMean   | logFC        | pValue      | FDR         |
|------------|-------------|-------------|--------------|-------------|-------------|
| AC084880.3 | 0.135912057 | 1.608491711 | 3.564963148  | 5.16E-30    | 4.61E-29    |
| Z99289.1   | 0.03301156  | 0.351164036 | 3.411101863  | 3.31E-30    | 3.03E-29    |
| AKR7A2P1   | 0.035126332 | 0.336592543 | 3.260378383  | 4.92E-30    | 4.41E-29    |
| AL845552.1 | 0.028714454 | 0.230873458 | 3.007253305  | 7.62E-06    | 1.13E-05    |
| RNA5SP449  | 0.049439244 | 0.238119728 | 2.267958553  | 3.78E-11    | 7.78E-11    |
| AC135178.5 | 0.300388687 | 0.712719715 | 1.246504354  | 5.99E-22    | 2.55E-21    |
| RHD        | 0.109485998 | 0.284789574 | 1.379149955  | 9.13E-10    | 1.73E-09    |
| AC112694.2 | 0.112285837 | 0.295929546 | 1.398077783  | 8.38E-10    | 1.59E-09    |
| ABCG1      | 5.000240292 | 12.12078588 | 1.277413911  | 5.52E-28    | 3.91E-27    |
| IGHG2      | 53.540109   | 210.2353181 | 1.973313072  | 5.58E-06    | 8.34E-06    |
| SNORA2A    | 0.230062549 | 1.081580297 | 2.23304272   | 2.94E-13    | 6.91E-13    |
| ALAS1      | 28.54401931 | 13.93552561 | -1.034421078 | 1.16E-33    | 1.87E-32    |
| PDCL3P4    | 0.888970474 | 1.889042138 | 1.087447476  | 0.000403074 | 0.000532125 |
| AC025287.3 | 0.256912254 | 0.615612468 | 1.260746749  | 5.68E-11    | 1.16E-10    |
| LINC00982  | 13.26859927 | 0.316471523 | -5.389796579 | 2.97E-40    | 4.71E-38    |
| AC004865.2 | 0.122290623 | 0.491641994 | 2.007294365  | 3.81E-29    | 3.07E-28    |
| AC135178.1 | 0.070889522 | 0.296774186 | 2.065721312  | 4.47E-12    | 9.76E-12    |
| WSB1       | 8.174707139 | 17.08986734 | 1.063902246  | 5.34E-11    | 1.09E-10    |
| TRDC       | 0.536539903 | 2.540657403 | 2.243444473  | 1.04E-31    | 1.17E-30    |
| AC012170.3 | 0.157508627 | 0.353434671 | 1.166012723  | 8.27E-07    | 1.30E-06    |
| NKAPL      | 0.965093628 | 0.456012362 | -1.081595975 | 3.72E-25    | 2.05E-24    |
| KSR1       | 2.708142889 | 10.44603089 | 1.947579108  | 2.59E-28    | 1.91E-27    |
| ETNK2      | 20.55196175 | 6.529046657 | -1.654331854 | 1.01E-21    | 4.24E-21    |
| CHN2       | 2.039346169 | 0.69482304  | -1.553389188 | 1.24E-36    | 4.35E-35    |
| AC009159.3 | 1.631306993 | 3.993357697 | 1.291573998  | 1.95E-13    | 4.62E-13    |
| MIR3941    | 0.10197068  | 0.785412746 | 2.94529662   | 1.87E-13    | 4.43E-13    |
| AL049539.1 | 0.044403363 | 0.23688956  | 2.41547375   | 1.08E-07    | 1.81E-07    |
| AC087276.1 | 0.195804961 | 0.833166315 | 2.089187193  | 2.06E-16    | 5.90E-16    |
| SLC16A5    | 22.0304321  | 2.609375861 | -3.077721118 | 3.94E-37    | 1.67E-35    |
| TBX15      | 0.210030784 | 1.786312855 | 3.088312072  | 1.32E-32    | 1.76E-31    |
| LINC01612  | 3.150561376 | 0.338202929 | -3.219647854 | 2.61E-46    | 1.85E-43    |
| SCN2A      | 0.997240903 | 0.117666152 | -3.083242689 | 2.81E-37    | 1.26E-35    |
| TRIM52     | 1.508779863 | 3.318789658 | 1.13727487   | 1.92E-23    | 9.20E-23    |
| AMZ1       | 0.02425658  | 0.369250299 | 3.928151014  | 1.54E-33    | 2.42E-32    |
| LHX1-DT    | 5.958081772 | 0.343124838 | -4.118042455 | 6.11E-41    | 1.48E-38    |
| YPEL4      | 0.09611978  | 0.604062004 | 2.651791398  | 1.90E-37    | 9.05E-36    |
| HNF4A-AS1  | 2.914970828 | 0.144329283 | -4.336045503 | 2.24E-20    | 8.48E-20    |
| TCF21      | 10.25957853 | 0.917941382 | -3.482425626 | 1.15E-39    | 1.38E-37    |
| MIR6503    | 0.071031215 | 0.835919587 | 3.556839093  | 3.86E-19    | 1.33E-18    |
| COL3A1     | 46.07860072 | 112.8471836 | 1.292201601  | 1.52E-12    | 3.42E-12    |
| LINC02041  | 0.352964463 | 4.161978755 | 3.559674756  | 2.33E-29    | 1.93E-28    |
| BCL2L10    | 2.550475111 | 0.771822101 | -1.724425762 | 2.94E-30    | 2.71E-29    |
| LOXL2      | 3.709400017 | 23.0460262  | 2.63526025   | 7.85E-33    | 1.08E-31    |
| SLC18A3    | 0.002540888 | 1.374411798 | 9.079266102  | 9.38E-09    | 1.67E-08    |
| MESP1      | 0.360661401 | 0.850691748 | 1.237991428  | 2.72E-18    | 8.84E-18    |
| SLC22A4    | 2.625763261 | 5.739698215 | 1.128238035  | 3.96E-12    | 8.67E-12    |
| TAC1       | 0.879882936 | 0.111907125 | -2.975009697 | 7.19E-33    | 9.97E-32    |
| NAT2       | 0.900692763 | 0.270082497 | -1.737634922 | 3.30E-29    | 2.69E-28    |
| APOC1P1    | 0.018793974 | 0.307021313 | 4.029996764  | 1.33E-33    | 2.11E-32    |
| P4HB       | 77.15507111 | 201.3146886 | 1.383619552  | 1.51E-35    | 3.78E-34    |
| PTOV1-AS2  | 0.642868247 | 2.771483232 | 2.10806328   | 1.53E-18    | 5.07E-18    |
| LCK        | 2.048330546 | 4.955535296 | 1.274592359  | 8.55E-16    | 2.36E-15    |
| AC104031.1 | 1.315596706 | 6.273398718 | 2.253529958  | 2.77E-18    | 9.00E-18    |
| AL512791.1 | 0.66579777  | 1.915916058 | 1.52487841   | 3.98E-13    | 9.28E-13    |
| FJX1       | 2.309058068 | 6.492966056 | 1.491573213  | 1.30E-27    | 8.85E-27    |

Table S1. The differentially expressed genes(DEGs) were screened out in TCGA

| ID         | conMean     | treatMean   | logFC        | pValue      | FDR         |
|------------|-------------|-------------|--------------|-------------|-------------|
| RPS20P14   | 0.884776075 | 2.288692258 | 1.371139209  | 6.25E-16    | 1.74E-15    |
| LY6E-DT    | 0.24588886  | 1.076474862 | 2.130236351  | 1.38E-14    | 3.52E-14    |
| AC023669.1 | 0.304971577 | 1.779069967 | 2.544376552  | 0.002890134 | 0.003589436 |
| AL445673.1 | 0.174220522 | 0.739341759 | 2.08532683   | 2.97E-19    | 1.04E-18    |
| FCGR3A     | 5.324274978 | 54.78629213 | 3.363157979  | 1.15E-37    | 5.91E-36    |
| AC145207.8 | 0.097559027 | 0.244886773 | 1.327767573  | 2.10E-08    | 3.66E-08    |
| MAFA-AS1   | 0.038338823 | 0.273866274 | 2.836593657  | 0.000268762 | 0.000359349 |
| NR2E1      | 0.035360978 | 0.719879866 | 4.347526103  | 1.26E-05    | 1.83E-05    |
| LDHD       | 27.38050605 | 5.644840111 | -2.278144488 | 1.43E-31    | 1.57E-30    |
| PEPD       | 84.34766029 | 23.9005466  | -1.819304437 | 3.68E-21    | 1.48E-20    |
| DIO1       | 26.5740953  | 1.008427804 | -4.71984087  | 2.88E-21    | 1.17E-20    |
| AC011899.3 | 0.041002606 | 0.317017231 | 2.950773755  | 7.39E-32    | 8.57E-31    |
| RPL10      | 137.9935456 | 282.6638575 | 1.034486638  | 8.93E-33    | 1.22E-31    |
| AC023509.3 | 0.146996536 | 0.752397199 | 2.355712318  | 1.70E-24    | 8.89E-24    |
| AP000873.2 | 0.325321008 | 0.664423958 | 1.030240104  | 6.83E-12    | 1.47E-11    |
| PLAGL1     | 1.836169739 | 4.418175673 | 1.266751353  | 2.69E-21    | 1.09E-20    |
| RNU6-930P  | 0.083243149 | 0.33827271  | 2.022783354  | 2.92E-07    | 4.73E-07    |
| ASPDH      | 12.4909683  | 1.884029867 | -2.728991578 | 5.80E-10    | 1.11E-09    |
| MCF2L-AS1  | 2.411878111 | 0.498237863 | -2.275250433 | 1.59E-36    | 5.35E-35    |
| LINC02274  | 4.878736272 | 13.7714662  | 1.497102763  | 6.17E-13    | 1.42E-12    |
| PDP2       | 4.253299083 | 1.498487312 | -1.505075438 | 1.43E-36    | 4.93E-35    |
| USP46      | 4.265539917 | 1.750047916 | -1.285333941 | 1.79E-39    | 1.93E-37    |
| NKG7       | 2.946645176 | 33.89984614 | 3.524133473  | 1.55E-36    | 5.26E-35    |
| TMEM82     | 6.406256995 | 2.962212287 | -1.11280664  | 1.59E-05    | 2.31E-05    |
| LINC01152  | 0.080504212 | 0.571609066 | 2.827892625  | 2.70E-25    | 1.51E-24    |
| SNORA22B   | 0.0578702   | 0.234645921 | 2.019592843  | 2.82E-06    | 4.29E-06    |
| LINC00216  | 0.123240616 | 0.294806175 | 1.258288942  | 0.003633931 | 0.004482378 |
| AC080112.3 | 0.108886245 | 0.452154788 | 2.05399502   | 6.28E-24    | 3.12E-23    |
| RRN3P2     | 0.173627052 | 0.530757282 | 1.61206052   | 1.28E-20    | 4.94E-20    |
| KLF5       | 10.33221908 | 3.659709134 | -1.497349244 | 1.07E-27    | 7.33E-27    |
| TNNI2      | 0.132532006 | 0.703935369 | 2.409102169  | 5.02E-32    | 5.97E-31    |
| AL161669.3 | 0.768424278 | 2.13739052  | 1.475875519  | 5.44E-07    | 8.67E-07    |
| AC244197.3 | 0.107981339 | 0.42859881  | 1.988845829  | 6.17E-16    | 1.72E-15    |
| INPP5D     | 1.973086658 | 6.462947246 | 1.711737895  | 7.42E-34    | 1.25E-32    |
| RSPO4      | 0.056528742 | 0.341165889 | 2.593416921  | 3.51E-08    | 6.04E-08    |
| AMFR       | 61.35922611 | 22.50680849 | -1.446918793 | 4.49E-38    | 2.70E-36    |
| AL031714.1 | 0.188507858 | 0.798453436 | 2.08258361   | 1.83E-24    | 9.55E-24    |
| FSTL3      | 11.03094181 | 36.62563896 | 1.731297957  | 6.63E-20    | 2.43E-19    |
| SHBG       | 0.962381983 | 0.206551441 | -2.220108506 | 5.84E-27    | 3.75E-26    |
| WNT9A      | 0.420453181 | 0.880848393 | 1.066948571  | 0.000556335 | 0.000727458 |
| POLR2KP1   | 0.138386897 | 0.353586711 | 1.35335671   | 1.68E-06    | 2.60E-06    |
| LILRA4     | 0.119213843 | 0.687380617 | 2.527557403  | 1.37E-25    | 7.89E-25    |
| SUOX       | 15.40417578 | 7.440068766 | -1.04993363  | 6.43E-38    | 3.64E-36    |
| AC011383.1 | 0.038250756 | 0.406493653 | 3.409672654  | 1.20E-23    | 5.86E-23    |
| OTOAP1     | 0.027380156 | 0.238963714 | 3.125589016  | 1.23E-38    | 9.07E-37    |
| AC005899.7 | 0.089888873 | 0.373835774 | 2.056190189  | 4.24E-15    | 1.12E-14    |
| PLAC9      | 3.733137958 | 9.161709919 | 1.29522806   | 6.99E-14    | 1.71E-13    |
| AL359399.1 | 0.040462567 | 0.400934604 | 3.308707183  | 4.61E-19    | 1.59E-18    |
| TRAV27     | 0.080017135 | 0.826501118 | 3.368635894  | 1.54E-17    | 4.78E-17    |
| WNT6       | 0.223415152 | 0.502545601 | 1.169527481  | 0.00376003  | 0.004633206 |
| SNORA5A    | 0.278544208 | 1.907501918 | 2.775706286  | 9.86E-13    | 2.24E-12    |
| TNKS2-AS1  | 0.964664955 | 0.316663156 | -1.607078936 | 5.05E-23    | 2.34E-22    |
| KLC3       | 1.091151011 | 0.262438015 | -2.055802159 | 5.76E-30    | 5.12E-29    |
| KCNJ5      | 5.987828892 | 2.247310529 | -1.413833509 | 0.001127625 | 0.001444831 |
| AL157791.2 | 0.123332945 | 0.450409971 | 1.868680537  | 2.73E-15    | 7.30E-15    |



Table S1. The differentially expressed genes(DEGs) were screened out in TCGA

| ID          | conMean     | treatMean   | logFC        | pValue      | FDR         |
|-------------|-------------|-------------|--------------|-------------|-------------|
| EME1        | 0.118293792 | 0.502080546 | 2.085544463  | 2.01E-34    | 3.79E-33    |
| CBLN3       | 1.152428208 | 3.602153913 | 1.644182947  | 6.46E-28    | 4.55E-27    |
| TVP23A      | 0.150986453 | 0.38927777  | 1.366380849  | 5.27E-21    | 2.09E-20    |
| ACHE        | 0.622196647 | 1.519225254 | 1.287893266  | 0.003934003 | 0.004837729 |
| PRTN3       | 0.040807546 | 0.25283187  | 2.631270478  | 1.24E-10    | 2.47E-10    |
| AC018638.5  | 2.744867347 | 8.85276631  | 1.68939191   | 9.82E-24    | 4.81E-23    |
| BMPER       | 0.146831769 | 0.405863646 | 1.466830976  | 9.00E-05    | 0.000123989 |
| SYT1        | 1.069950865 | 0.224506289 | -2.25271678  | 5.06E-34    | 8.78E-33    |
| AC246787.1  | 1.136922089 | 3.321617631 | 1.546752614  | 2.35E-20    | 8.86E-20    |
| AC118344.1  | 0.153617001 | 0.307350088 | 1.000545004  | 0.000155205 | 0.000210782 |
| RN7SL128P   | 0.100056471 | 1.120135266 | 3.484786587  | 0.039525055 | 0.04493825  |
| CORO1A      | 2.703767621 | 14.76266884 | 2.448910492  | 2.51E-33    | 3.79E-32    |
| CDON        | 0.620468379 | 3.000772979 | 2.273904584  | 2.82E-29    | 2.31E-28    |
| CFL1P5      | 0.187136035 | 0.387265893 | 1.049237058  | 1.05E-10    | 2.10E-10    |
| LAMA5-AS1   | 0.102876616 | 0.812123599 | 2.98078422   | 4.16E-30    | 3.77E-29    |
| C1QB        | 23.21477589 | 179.5414103 | 2.951201374  | 2.69E-35    | 6.31E-34    |
| RPS20P4     | 0.042325676 | 0.271253861 | 2.680038667  | 2.38E-19    | 8.36E-19    |
| TRAV26-2    | 0.057277341 | 0.388472446 | 2.761775838  | 3.69E-15    | 9.78E-15    |
| AC060780.3  | 0.782240319 | 2.151177374 | 1.459442681  | 3.89E-10    | 7.51E-10    |
| SERPINH1    | 17.48710889 | 50.73820463 | 1.53678068   | 3.99E-33    | 5.84E-32    |
| ADGRE1      | 0.169917055 | 1.136049951 | 2.741123696  | 6.51E-33    | 9.12E-32    |
| KIF14       | 0.084313681 | 0.312318041 | 1.88917725   | 3.36E-32    | 4.12E-31    |
| P2RY13      | 1.04058252  | 3.482637241 | 1.742788828  | 4.61E-23    | 2.14E-22    |
| PIK3R6      | 0.137901625 | 1.443178438 | 3.387538325  | 3.59E-39    | 3.28E-37    |
| IGLV5-45    | 1.532065772 | 5.745637537 | 1.90698875   | 1.51E-05    | 2.20E-05    |
| MORF4L2-AS1 | 0.154217845 | 0.312001953 | 1.016585343  | 1.18E-05    | 1.72E-05    |
| AC111186.1  | 0.083900485 | 0.23360152  | 1.477298598  | 2.31E-06    | 3.53E-06    |
| CXCR6       | 0.308036263 | 2.060846095 | 2.742064663  | 1.85E-31    | 2.01E-30    |
| AC104126.1  | 1.162663196 | 5.412947297 | 2.218981108  | 3.68E-07    | 5.92E-07    |
| DGKZ        | 3.085506722 | 7.622944624 | 1.304840958  | 1.20E-34    | 2.39E-33    |
| KISS1R      | 0.164233087 | 6.056842695 | 5.204749229  | 1.57E-33    | 2.47E-32    |
| AC092653.1  | 0.136184582 | 0.387262806 | 1.507749571  | 7.96E-18    | 2.51E-17    |
| ECSCR       | 4.376643861 | 10.48656868 | 1.260645791  | 1.59E-21    | 6.58E-21    |
| TMEM155     | 0.017928872 | 0.655659625 | 5.19259043   | 5.20E-39    | 4.37E-37    |
| SAPCD1-AS1  | 0.924251056 | 0.364679832 | -1.341654371 | 1.09E-30    | 1.06E-29    |
| PSMB9       | 5.288747181 | 24.81906221 | 2.230450688  | 1.07E-37    | 5.57E-36    |
| AC006064.1  | 0.039086055 | 0.223274369 | 2.514091754  | 3.13E-19    | 1.09E-18    |
| PCED1B-AS1  | 0.477538906 | 3.126144024 | 2.710694064  | 7.88E-36    | 2.14E-34    |
| EMCN        | 30.37034835 | 14.68963719 | -1.047864693 | 1.42E-19    | 5.09E-19    |
| ANGPTL1     | 7.418793986 | 1.196912248 | -2.631867294 | 3.95E-36    | 1.15E-34    |
| SLC25A5-AS1 | 1.906289936 | 0.465586068 | -2.033647768 | 7.05E-37    | 2.72E-35    |
| AC090589.3  | 0.409017473 | 1.357323426 | 1.730530151  | 4.99E-20    | 1.85E-19    |
| ZC3HAV1L    | 2.044624458 | 4.776817133 | 1.224213765  | 4.77E-20    | 1.77E-19    |
| AC090709.1  | 2.120159188 | 0.009765957 | -7.7621955   | 4.17E-67    | 4.30E-63    |
| AC138409.2  | 0.083065689 | 0.266853049 | 1.683720914  | 1.46E-17    | 4.53E-17    |
| AL671883.2  | 1.153151556 | 2.704006295 | 1.229516376  | 2.47E-25    | 1.38E-24    |
| AC124944.1  | 0.034606377 | 0.274790708 | 2.98922342   | 3.30E-24    | 1.68E-23    |
| NPIPP1      | 0.558762067 | 2.295663486 | 2.03860519   | 4.42E-27    | 2.88E-26    |
| RNU4ATAC1   | 0.018827601 | 0.380893536 | 4.338466685  | 1.73E-11    | 3.63E-11    |
| AC010300.1  | 0.081179677 | 0.217180591 | 1.419704681  | 1.89E-07    | 3.10E-07    |
| TIMM9P2     | 0.089014021 | 0.37777668  | 2.085429143  | 4.31E-07    | 6.91E-07    |
| LDHB        | 428.8609028 | 146.1951428 | -1.552614419 | 8.55E-39    | 6.62E-37    |
| ORAI3       | 5.373079931 | 12.97450976 | 1.271858823  | 6.75E-34    | 1.14E-32    |
| DEGS1       | 24.54561431 | 58.28496078 | 1.2476584    | 3.85E-31    | 3.98E-30    |
| LIPA        | 19.79203097 | 44.87582433 | 1.181018777  | 1.51E-23    | 7.32E-23    |

Table S1. The differentially expressed genes(DEGs) were screened out in TCGA

| ID         | conMean     | treatMean   | logFC        | pValue      | FDR         |
|------------|-------------|-------------|--------------|-------------|-------------|
| TMCC1-AS1  | 0.216668486 | 0.745242156 | 1.782219952  | 1.48E-34    | 2.88E-33    |
| SCUBE3     | 1.705700753 | 0.823103538 | -1.051218739 | 9.07E-12    | 1.94E-11    |
| AC114495.2 | 0.206934065 | 0.666247321 | 1.686886671  | 7.14E-13    | 1.64E-12    |
| MIR3174    | 0.059164632 | 0.395588056 | 2.741191958  | 2.50E-07    | 4.06E-07    |
| BCL7A      | 7.701682    | 3.780897663 | -1.026444755 | 1.03E-30    | 1.01E-29    |
| KCNV1      | 0.072285454 | 0.234676175 | 1.698894117  | 0.042799267 | 0.048537585 |
| AC233280.2 | 0.080840612 | 0.271078857 | 1.745560451  | 8.27E-10    | 1.57E-09    |
| RPL29P14   | 0.096331396 | 0.54347966  | 2.496148067  | 2.02E-10    | 3.98E-10    |
| AC020917.4 | 0.249400595 | 1.092883681 | 2.131603048  | 2.57E-23    | 1.22E-22    |
| MAGI2-AS3  | 5.701242833 | 1.921800221 | -1.568818081 | 3.07E-26    | 1.86E-25    |
| STEAP4     | 2.051316785 | 5.061920532 | 1.303134554  | 1.32E-10    | 2.63E-10    |
| DDX12P     | 0.107296925 | 0.762302203 | 2.828754317  | 1.63E-32    | 2.15E-31    |
| HLA-DQA2   | 7.124018247 | 39.21800228 | 2.460752932  | 6.66E-14    | 1.63E-13    |
| LINC01150  | 0.228776632 | 1.151939418 | 2.332053242  | 1.24E-29    | 1.06E-28    |
| AL031848.1 | 0.119280874 | 0.400093448 | 1.745974263  | 0.000576926 | 0.000753617 |
| PLPPR4     | 0.213911511 | 0.428574051 | 1.002530387  | 0.003301897 | 0.004084568 |
| AC009950.1 | 0.130414333 | 0.356219699 | 1.449664864  | 6.21E-27    | 3.99E-26    |
| EPM2A      | 3.451112939 | 1.354741728 | -1.349043849 | 3.09E-39    | 2.92E-37    |
| TRBJ2-1    | 0.223418438 | 1.614231899 | 2.853027696  | 6.50E-22    | 2.77E-21    |
| LINC01546  | 0.026377838 | 0.231946237 | 3.136392198  | 2.03E-31    | 2.19E-30    |
| AP001830.1 | 0.702669326 | 1.554427449 | 1.145465455  | 7.62E-15    | 1.98E-14    |
| INO80E     | 3.410822972 | 8.020481561 | 1.233568982  | 3.16E-36    | 9.44E-35    |
| AL365356.3 | 0.230216358 | 0.677928585 | 1.558142954  | 7.62E-15    | 1.98E-14    |
| CSF1       | 7.164363264 | 14.4531964  | 1.012478193  | 4.67E-22    | 2.01E-21    |
| B2M        | 435.5191014 | 1104.585561 | 1.342697274  | 2.53E-33    | 3.82E-32    |
| OIP5       | 0.289743232 | 0.861085187 | 1.571381008  | 3.47E-32    | 4.25E-31    |
| GPRIN1     | 0.307153246 | 1.369553214 | 2.156674787  | 2.44E-31    | 2.60E-30    |
| PYHIN1     | 0.172445116 | 1.405146101 | 3.026510971  | 5.03E-33    | 7.22E-32    |
| LINC01736  | 0.061913901 | 0.420851079 | 2.764974551  | 7.35E-22    | 3.11E-21    |
| LINC02195  | 0.027041274 | 0.297716564 | 3.460704474  | 4.15E-20    | 1.54E-19    |
| ACKR2      | 0.926836596 | 0.190462646 | -2.282806932 | 4.50E-35    | 1.00E-33    |
| RN7SL208P  | 0.165518838 | 0.400838903 | 1.276027109  | 0.00088854  | 0.001147273 |
| PRRG1      | 7.809160319 | 3.171903763 | -1.299818431 | 2.04E-30    | 1.92E-29    |
| SMG1P7     | 0.11726164  | 0.488570014 | 2.058834181  | 1.85E-22    | 8.17E-22    |
| AL008707.1 | 0.123474995 | 0.415506353 | 1.750651621  | 2.14E-11    | 4.47E-11    |
| ANO1       | 2.607134011 | 9.385392956 | 1.847952409  | 5.24E-25    | 2.86E-24    |
| AC004908.3 | 0.274564273 | 0.732766579 | 1.416209796  | 3.19E-10    | 6.20E-10    |
| TH2LCRR    | 0.05910671  | 0.250700743 | 2.08457245   | 9.11E-17    | 2.68E-16    |
| AC073325.2 | 0.300996484 | 1.025238014 | 1.768140337  | 2.58E-11    | 5.36E-11    |
| Z83843.1   | 0.54655055  | 1.609296565 | 1.558003373  | 1.02E-12    | 2.31E-12    |
| TMEM86A    | 8.604149361 | 3.279287343 | -1.391650248 | 6.71E-36    | 1.85E-34    |
| LLGL2      | 13.42304108 | 5.685389038 | -1.239380583 | 3.39E-35    | 7.72E-34    |
| RAD51AP1   | 0.613055693 | 1.525074871 | 1.314790025  | 9.45E-29    | 7.30E-28    |
| HLA-DMB    | 8.848303875 | 18.98307058 | 1.101240534  | 1.11E-16    | 3.24E-16    |
| HLA-DRA    | 343.1340806 | 1147.741158 | 1.741952989  | 6.26E-28    | 4.41E-27    |
| AP000797.3 | 0.009056442 | 0.252962234 | 4.803833867  | 9.08E-20    | 3.30E-19    |
| AC010326.4 | 1.019886433 | 2.505785876 | 1.296854625  | 7.96E-19    | 2.69E-18    |
| TRAV17     | 0.140349866 | 0.945829806 | 2.752552917  | 6.60E-21    | 2.60E-20    |
| AC004585.1 | 0.089846222 | 0.922131088 | 3.359442114  | 2.00E-31    | 2.16E-30    |
| LENG8      | 7.999182653 | 24.47658098 | 1.613477549  | 1.01E-16    | 2.97E-16    |
| PCDHB6     | 0.535168546 | 1.872915526 | 1.807220601  | 1.89E-09    | 3.52E-09    |
| BMPR1B-DT  | 1.455253724 | 0.054169588 | -4.747643773 | 4.55E-52    | 7.80E-49    |
| HNRNPA1P1  | 0.085082094 | 0.256667066 | 1.592970745  | 2.91E-07    | 4.71E-07    |
| LAMP3      | 0.75555239  | 1.67583864  | 1.149274105  | 9.88E-17    | 2.90E-16    |
| IGLV1-41   | 0.180827749 | 1.282299729 | 2.826045532  | 0.000190525 | 0.000257182 |

Table S1. The differentially expressed genes(DEGs) were screened out in TCGA

| ID         | conMean     | treatMean   | logFC        | pValue      | FDR         |
|------------|-------------|-------------|--------------|-------------|-------------|
| MMP1       | 2.865098558 | 6.066956861 | 1.082388285  | 0.001389254 | 0.001768834 |
| RF00404    | 0.167904951 | 0.493307882 | 1.554843566  | 1.13E-07    | 1.88E-07    |
| SIGLEC1    | 0.553293826 | 3.309869657 | 2.580656675  | 3.08E-31    | 3.23E-30    |
| MIR140     | 0.80691875  | 5.594120875 | 2.793416109  | 3.60E-19    | 1.25E-18    |
| RASL10A    | 0.088502374 | 0.379535054 | 2.100445088  | 1.45E-25    | 8.33E-25    |
| GBP1       | 6.002254292 | 21.85772452 | 1.864566872  | 8.03E-26    | 4.70E-25    |
| RN7SL180P  | 0.077846777 | 0.392133036 | 2.332633972  | 0.004151887 | 0.005098053 |
| MFNG       | 3.649244458 | 8.467584873 | 1.214352744  | 2.87E-28    | 2.10E-27    |
| CD27       | 0.729040837 | 7.389494292 | 3.341404101  | 1.74E-29    | 1.46E-28    |
| AC098614.4 | 0.604291846 | 2.253037619 | 1.898554023  | 7.35E-16    | 2.04E-15    |
| EDIL3      | 10.83350471 | 23.76740427 | 1.13348431   | 2.00E-09    | 3.73E-09    |
| BTBD16     | 0.132070097 | 1.538103079 | 3.541776433  | 1.99E-33    | 3.06E-32    |
| LINC02157  | 0.149540575 | 0.369755269 | 1.306033722  | 2.60E-06    | 3.97E-06    |
| LINC01702  | 2.552884988 | 0.345894001 | -2.883726646 | 9.95E-19    | 3.34E-18    |
| SH2B3      | 7.154943556 | 17.78482048 | 1.313634121  | 9.56E-28    | 6.59E-27    |
| ATP1B1     | 828.4410625 | 321.4619011 | -1.365751301 | 2.04E-34    | 3.85E-33    |
| LINC01857  | 0.149180115 | 1.176315933 | 2.979148435  | 1.11E-26    | 7.00E-26    |
| AL162430.2 | 0.068273418 | 0.307635553 | 2.171826349  | 9.24E-18    | 2.90E-17    |
| LYPD6      | 1.175642684 | 0.178839566 | -2.716711788 | 6.53E-36    | 1.81E-34    |
| RPLP0      | 162.7625281 | 331.219276  | 1.025018042  | 5.91E-30    | 5.25E-29    |
| SNHG3      | 1.434006997 | 2.874319313 | 1.003168278  | 1.78E-08    | 3.11E-08    |
| ITPR1-DT   | 1.062180918 | 0.462842719 | -1.198435586 | 2.39E-19    | 8.42E-19    |
| FPR3       | 3.044746508 | 14.24515296 | 2.226077087  | 3.11E-28    | 2.26E-27    |
| GIT2       | 2.02658     | 5.125554665 | 1.338661008  | 1.05E-29    | 9.07E-29    |
| HLA-DQB2   | 2.422724475 | 17.12781795 | 2.821639118  | 7.47E-25    | 4.02E-24    |
| GPAT3      | 31.91128811 | 5.607160768 | -2.508724505 | 3.30E-35    | 7.56E-34    |
| MS4A7      | 2.808058072 | 15.56794507 | 2.470933848  | 3.87E-34    | 6.91E-33    |
| CDC45      | 0.204142215 | 0.98382515  | 2.268827387  | 2.08E-35    | 5.01E-34    |
| UBA52P8    | 0.386495455 | 1.13251334  | 1.551004691  | 4.62E-11    | 9.45E-11    |
| AC005332.7 | 0.130386864 | 0.394477518 | 1.597144549  | 6.28E-17    | 1.86E-16    |
| AC012404.1 | 0.017146455 | 0.499150403 | 4.863492343  | 1.40E-08    | 2.46E-08    |
| SNORA68B   | 0.071197547 | 0.35232786  | 2.307019126  | 4.23E-11    | 8.67E-11    |
| PRELID2    | 0.421487728 | 1.795662    | 2.090953284  | 2.08E-35    | 5.01E-34    |
| BMP6       | 14.4672776  | 3.283360442 | -2.139548426 | 2.46E-19    | 8.63E-19    |
| AKAP5      | 1.415611447 | 0.567259281 | -1.319345121 | 2.16E-19    | 7.62E-19    |
| AC068790.5 | 0.149478973 | 0.657821977 | 2.137754652  | 5.98E-22    | 2.55E-21    |
| AC017100.1 | 1.253366303 | 0.622589019 | -1.009456074 | 8.88E-22    | 3.74E-21    |
| IL17RE     | 2.600160454 | 0.951753036 | -1.449941482 | 3.77E-29    | 3.04E-28    |
| AC007991.4 | 0.011748735 | 0.384423637 | 5.032119694  | 4.48E-29    | 3.59E-28    |
| LINC02449  | 0.256072913 | 0.53877942  | 1.073140086  | 2.26E-08    | 3.92E-08    |
| ITGAM      | 1.19621866  | 4.879095226 | 2.028132514  | 1.47E-30    | 1.41E-29    |
| STEAP1B    | 0.063848706 | 0.297272238 | 2.219055453  | 2.01E-22    | 8.86E-22    |
| CDC20      | 0.978308635 | 3.118393183 | 1.672441262  | 4.00E-27    | 2.61E-26    |
| WDR27      | 0.547834221 | 1.42734045  | 1.381518196  | 8.97E-13    | 2.05E-12    |
| AP001931.1 | 0.21892878  | 0.554793892 | 1.341490284  | 4.80E-09    | 8.70E-09    |
| FERMT3     | 2.426102363 | 10.57932314 | 2.124535     | 1.48E-34    | 2.88E-33    |
| AL583832.1 | 0.0779928   | 0.261079871 | 1.743078383  | 2.30E-11    | 4.80E-11    |
| FGF9       | 9.149162983 | 1.075261352 | -3.088952401 | 1.56E-36    | 5.28E-35    |
| LINC01474  | 0.130085024 | 0.514798811 | 1.984553843  | 1.96E-16    | 5.64E-16    |
| RNU6-678P  | 0.107503768 | 0.403428302 | 1.907925077  | 2.16E-08    | 3.76E-08    |
| AC115284.2 | 0.628201907 | 0.192564751 | -1.705884684 | 4.37E-30    | 3.94E-29    |
| SLC13A3    | 72.00659971 | 2.805283593 | -4.681910613 | 9.40E-21    | 3.66E-20    |
| CRB2       | 3.43696713  | 0.492738815 | -2.802241027 | 8.96E-10    | 1.70E-09    |
| AP005212.2 | 0.059479456 | 0.265345937 | 2.157411114  | 8.92E-11    | 1.79E-10    |
| CEACAM21   | 0.333127012 | 1.227125435 | 1.88113848   | 4.50E-28    | 3.23E-27    |

Table S1. The differentially expressed genes(DEGs) were screened out in TCGA

| ID          | conMean     | treatMean   | logFC        | pValue      | FDR         |
|-------------|-------------|-------------|--------------|-------------|-------------|
| C2orf92     | 0.109701749 | 0.474382284 | 2.11246361   | 8.69E-24    | 4.27E-23    |
| BNIP3P27    | 0.080116751 | 0.393242457 | 2.29524327   | 2.71E-09    | 4.99E-09    |
| AL354892.3  | 0.166186519 | 0.372114016 | 1.162941373  | 3.18E-09    | 5.82E-09    |
| AC007998.3  | 0.525834906 | 1.234404285 | 1.231133156  | 1.92E-06    | 2.95E-06    |
| AP000769.1  | 0.885670976 | 2.821652489 | 1.671697571  | 6.02E-28    | 4.25E-27    |
| EAF2        | 5.138787586 | 2.525312864 | -1.024965883 | 1.69E-08    | 2.96E-08    |
| AC000123.1  | 0.786116856 | 1.860508384 | 1.242881203  | 1.99E-25    | 1.12E-24    |
| MAMDC2      | 2.72457525  | 0.693518452 | -1.974025165 | 4.98E-30    | 4.46E-29    |
| AC022400.8  | 0.233741993 | 0.798530661 | 1.772430856  | 1.48E-29    | 1.25E-28    |
| IL20RB      | 0.672176993 | 10.24814299 | 3.930377536  | 6.27E-37    | 2.47E-35    |
| AL138767.3  | 0.643366061 | 0.25212342  | -1.351509693 | 8.79E-21    | 3.43E-20    |
| AC144548.1  | 0.08271539  | 0.250557785 | 1.598915674  | 3.59E-13    | 8.39E-13    |
| AC010463.2  | 0.027957635 | 0.460038065 | 4.040439016  | 6.05E-21    | 2.39E-20    |
| SP140       | 0.248055484 | 0.866994532 | 1.805360042  | 4.89E-21    | 1.95E-20    |
| ASPM        | 0.137410003 | 0.653812804 | 2.250390605  | 6.79E-33    | 9.49E-32    |
| CST6        | 1.902074173 | 0.670825225 | -1.503564663 | 2.22E-17    | 6.80E-17    |
| MFSD13B     | 0.139604007 | 0.412493468 | 1.563030921  | 5.64E-10    | 1.08E-09    |
| ARHGEF39    | 0.150836148 | 1.005209646 | 2.736442298  | 1.10E-40    | 2.35E-38    |
| AC023137.1  | 0.120572822 | 0.309129108 | 1.358304754  | 6.08E-06    | 9.07E-06    |
| AC126603.1  | 0.546273005 | 1.885903042 | 1.787561468  | 5.83E-10    | 1.11E-09    |
| NUDT1       | 1.930520633 | 4.451537321 | 1.205313677  | 6.51E-33    | 9.12E-32    |
| LINC01510   | 8.574224659 | 2.084540285 | -2.040276965 | 3.14E-09    | 5.75E-09    |
| AC107983.1  | 1.103371115 | 2.849277135 | 1.368677834  | 1.96E-16    | 5.64E-16    |
| RAB37       | 0.712586286 | 2.73703049  | 1.941474882  | 1.38E-32    | 1.83E-31    |
| HPN-AS1     | 0.212642214 | 0.700171954 | 1.719281241  | 4.27E-08    | 7.29E-08    |
| CD84        | 0.537409615 | 3.845515907 | 2.839083121  | 1.66E-32    | 2.18E-31    |
| ADPRHL1     | 0.690697993 | 0.328923464 | -1.070303103 | 3.59E-27    | 2.36E-26    |
| AL158827.2  | 0.1112767   | 0.250458544 | 1.170420282  | 5.24E-09    | 9.47E-09    |
| CAND2       | 1.834939486 | 0.525710641 | -1.803391644 | 1.01E-36    | 3.69E-35    |
| AL138721.1  | 0.137966413 | 0.632580631 | 2.196932287  | 6.66E-10    | 1.27E-09    |
| GALNT3      | 8.438114076 | 1.431968301 | -2.558921035 | 4.02E-36    | 1.17E-34    |
| ATP5PDP4    | 0.343024114 | 0.714617179 | 1.058860597  | 2.20E-06    | 3.37E-06    |
| AL513365.2  | 0.13790796  | 0.404823175 | 1.553586154  | 1.08E-14    | 2.77E-14    |
| PDCD1       | 0.257014739 | 2.666049357 | 3.374780489  | 3.86E-26    | 2.32E-25    |
| AC009154.1  | 0.04623392  | 0.332456688 | 2.846142807  | 6.95E-09    | 1.25E-08    |
| AC010525.1  | 0.065975193 | 0.276679929 | 2.068222414  | 1.26E-08    | 2.22E-08    |
| HS6ST2      | 10.61975078 | 0.1425965   | -6.218667533 | 5.22E-41    | 1.34E-38    |
| CYP4F2      | 12.57277723 | 0.40139887  | -4.969122998 | 4.28E-17    | 1.29E-16    |
| LY6G5B      | 0.177001851 | 0.967895761 | 2.451087234  | 8.46E-22    | 3.57E-21    |
| PTP4A3      | 5.701081667 | 20.8782656  | 1.872694296  | 2.77E-34    | 5.06E-33    |
| BX640514.2  | 0.309585969 | 1.326625909 | 2.099349613  | 3.01E-28    | 2.20E-27    |
| SEMA6A-AS10 | 1.44724342  | 0.740373344 | 2.354945358  | 1.72E-27    | 1.16E-26    |
| AC244517.6  | 0.12025112  | 0.250257365 | 1.0573622    | 0.000995126 | 0.001279999 |
| AC012066.1  | 0.033962885 | 0.232640698 | 2.776072594  | 1.55E-19    | 5.52E-19    |
| ZDHHC3      | 13.64500906 | 6.803601453 | -1.004002815 | 3.11E-33    | 4.62E-32    |
| IGBP1-AS1   | 0.096276568 | 0.377840418 | 1.97252042   | 7.08E-17    | 2.09E-16    |
| AC010761.3  | 0.182288929 | 0.653050153 | 1.840966849  | 7.63E-14    | 1.86E-13    |
| CD3E        | 1.760655164 | 11.22003117 | 2.671892403  | 8.19E-29    | 6.36E-28    |
| FBXL16      | 4.41547229  | 13.12623379 | 1.571813369  | 7.45E-15    | 1.93E-14    |
| BASP1P1     | 0.269657855 | 2.569696038 | 3.252395754  | 0.000140368 | 0.000191195 |
| AC092142.1  | 0.419777938 | 0.19470789  | -1.108314998 | 1.20E-20    | 4.64E-20    |
| AC034236.1  | 5.562373296 | 12.58526132 | 1.177962699  | 2.33E-15    | 6.25E-15    |
| IFI16       | 7.022676042 | 21.35546167 | 1.604512297  | 2.81E-32    | 3.49E-31    |
| AC145285.1  | 0.110376674 | 0.250343765 | 1.1814752    | 1.98E-09    | 3.68E-09    |
| AP000763.3  | 0.034723134 | 0.245492232 | 2.821708286  | 7.35E-18    | 2.32E-17    |

Table S1. The differentially expressed genes(DEGs) were screened out in TCGA

| ID          | conMean     | treatMean   | logFC        | pValue      | FDR         |
|-------------|-------------|-------------|--------------|-------------|-------------|
| CUZD1       | 0.168090419 | 0.419018925 | 1.317777907  | 3.68E-17    | 1.11E-16    |
| AL109615.1  | 0.054547336 | 7.016056543 | 7.007007833  | 5.72E-36    | 1.62E-34    |
| MLIP        | 0.069581502 | 0.312347902 | 2.166378109  | 1.86E-27    | 1.25E-26    |
| CLEC18C     | 0.668626969 | 2.335237522 | 1.804295846  | 7.79E-09    | 1.40E-08    |
| AC018816.2  | 0.297625349 | 0.795238856 | 1.417890842  | 0.00033641  | 0.000446494 |
| COL6A1      | 27.51836869 | 59.21488368 | 1.105564895  | 5.42E-17    | 1.62E-16    |
| AC103691.1  | 0.388933929 | 1.332946557 | 1.777021939  | 8.26E-16    | 2.28E-15    |
| RPL7P50     | 0.027957464 | 0.247761711 | 3.147647836  | 3.29E-29    | 2.68E-28    |
| SYPL2       | 5.765026083 | 2.331310243 | -1.306186129 | 2.19E-31    | 2.34E-30    |
| MIR1291     | 0.088031036 | 0.245066687 | 1.477090231  | 5.70E-07    | 9.08E-07    |
| AC253576.2  | 0.224225358 | 0.510799307 | 1.187807122  | 3.60E-05    | 5.09E-05    |
| HIST1H2BK   | 15.60831514 | 33.25068243 | 1.091069139  | 4.03E-11    | 8.27E-11    |
| PGBD5       | 0.704718219 | 2.431164767 | 1.786529254  | 5.22E-15    | 1.37E-14    |
| CHAC1       | 4.404742008 | 1.083240905 | -2.023703397 | 8.91E-28    | 6.17E-27    |
| KCNAB1      | 0.861697503 | 2.429327894 | 1.49530382   | 2.15E-20    | 8.16E-20    |
| ANKAR       | 0.335285046 | 0.723529482 | 1.109663666  | 2.17E-24    | 1.12E-23    |
| CSRNP3      | 1.294016257 | 0.431942902 | -1.582943219 | 1.60E-34    | 3.09E-33    |
| ZNF826P     | 3.213913482 | 9.879239535 | 1.620068901  | 1.32E-16    | 3.86E-16    |
| SPAG4       | 1.464010193 | 21.43590853 | 3.872032062  | 1.83E-40    | 3.40E-38    |
| ZKSCAN2-D10 | 0.240281043 | 0.857670623 | 1.835700873  | 1.06E-16    | 3.09E-16    |
| AP001094.2  | 0.090901885 | 0.643657052 | 2.823910088  | 2.00E-32    | 2.58E-31    |
| FAM57A      | 3.705001542 | 11.03845636 | 1.574992389  | 3.59E-29    | 2.90E-28    |
| LINC01114   | 0.103882963 | 0.423587035 | 2.027699371  | 0.001621037 | 0.002053416 |
| RPL31P61    | 0.083182249 | 0.384420382 | 2.208337225  | 6.21E-14    | 1.52E-13    |
| LBX2-AS1    | 3.087290622 | 7.877656231 | 1.351425164  | 3.70E-28    | 2.67E-27    |
| AC010271.1  | 0.131659221 | 0.297014407 | 1.173724351  | 4.16E-06    | 6.27E-06    |
| SRGAP2D     | 0.303261356 | 0.676881759 | 1.158342168  | 2.66E-11    | 5.53E-11    |
| SNORA2C     | 0.125369134 | 2.253001896 | 4.16759442   | 3.83E-10    | 7.40E-10    |
| LINC01402   | 0.190616266 | 0.514413559 | 1.432257436  | 1.06E-08    | 1.87E-08    |
| ALPK2       | 2.429858385 | 9.829275626 | 2.016212866  | 6.94E-25    | 3.75E-24    |
| Z97056.1    | 0.0709241   | 0.689246686 | 3.280672579  | 1.78E-20    | 6.79E-20    |
| ALS2CL      | 4.751228111 | 1.461386593 | -1.700962596 | 2.84E-27    | 1.89E-26    |
| AC123768.2  | 0.096441687 | 0.264401358 | 1.455000793  | 7.14E-14    | 1.74E-13    |
| BNIP1       | 0.829635176 | 0.283248702 | -1.55040772  | 9.41E-23    | 4.27E-22    |
| LILRB4      | 0.450543951 | 3.973962832 | 3.140838624  | 1.48E-36    | 5.08E-35    |
| PNRC2P1     | 2.187064062 | 1.077260869 | -1.021627825 | 6.80E-07    | 1.08E-06    |
| EBF2        | 0.318784504 | 2.134153921 | 2.743010823  | 1.95E-31    | 2.10E-30    |
| IGLV7-43    | 1.955734998 | 8.688353114 | 2.15137184   | 1.33E-05    | 1.94E-05    |
| TSSC2       | 0.187553409 | 0.509938103 | 1.443020655  | 1.54E-17    | 4.75E-17    |
| ENO2        | 5.282017392 | 47.76765384 | 3.176873062  | 8.85E-37    | 3.34E-35    |
| GIMAP7      | 13.68628575 | 32.19384067 | 1.234053724  | 4.41E-20    | 1.64E-19    |
| CHDH        | 16.15601893 | 6.838296663 | -1.240362824 | 8.88E-22    | 3.74E-21    |
| C16orf89    | 16.52573969 | 2.027019195 | -3.027283193 | 1.01E-33    | 1.65E-32    |
| AL022238.3  | 0.099236905 | 0.379808316 | 1.936322852  | 3.04E-14    | 7.60E-14    |
| DPY19L2P2   | 0.567186582 | 1.911702269 | 1.752962546  | 6.54E-21    | 2.57E-20    |
| CD70        | 1.815810682 | 36.13037075 | 4.31452636   | 9.13E-36    | 2.45E-34    |
| FGFR1OP     | 0.808658618 | 2.164913137 | 1.42070645   | 2.74E-26    | 1.67E-25    |
| CDCA7L      | 1.556091649 | 5.368508037 | 1.786594171  | 1.38E-29    | 1.17E-28    |
| RNU6-807P   | 0.15691013  | 0.533173607 | 1.764666873  | 3.24E-08    | 5.57E-08    |
| AC021851.1  | 0.139902516 | 0.314945156 | 1.170678717  | 5.95E-15    | 1.55E-14    |
| RASSF8      | 11.52839654 | 4.091519974 | -1.494483066 | 5.67E-40    | 7.89E-38    |
| AC007292.2  | 0.124418503 | 0.317284974 | 1.350578152  | 3.92E-24    | 1.98E-23    |
| MN1         | 0.757331717 | 1.531350656 | 1.015807421  | 3.33E-07    | 5.37E-07    |
| NXNL2       | 1.215935082 | 2.751500472 | 1.17815237   | 4.06E-12    | 8.88E-12    |
| AC137055.1  | 0.05719823  | 0.24151816  | 2.078089273  | 2.76E-07    | 4.47E-07    |

Table S1. The differentially expressed genes(DEGs) were screened out in TCGA

| ID         | conMean     | treatMean   | logFC        | pValue      | FDR         |
|------------|-------------|-------------|--------------|-------------|-------------|
| PPP1R36    | 1.478023525 | 0.259821455 | -2.508076759 | 3.42E-30    | 3.13E-29    |
| NHSL1      | 5.619309792 | 2.410254312 | -1.221207561 | 2.58E-33    | 3.88E-32    |
| STARD4-AS1 | 0.414538776 | 1.478126912 | 1.83419118   | 3.24E-24    | 1.65E-23    |
| RAB24      | 2.272892013 | 7.24519473  | 1.672495324  | 5.39E-33    | 7.70E-32    |
| PLIN2      | 26.37278014 | 208.070087  | 2.979948003  | 2.63E-31    | 2.78E-30    |
| TRAJ18     | 0.023256135 | 0.364358804 | 3.96967661   | 1.30E-11    | 2.76E-11    |
| TOMM20P2   | 0.141794125 | 0.675107046 | 2.251318518  | 4.55E-23    | 2.11E-22    |
| AL512652.1 | 0.070394588 | 0.255079651 | 1.85741139   | 8.37E-14    | 2.03E-13    |
| LINC00173  | 0.193862867 | 1.96901178  | 3.344363347  | 7.19E-27    | 4.59E-26    |
| HS6ST1     | 33.10929818 | 7.272424258 | -2.186728159 | 2.30E-36    | 7.23E-35    |
| FAM177B    | 0.113337707 | 0.417375716 | 1.88071874   | 2.49E-25    | 1.39E-24    |
| AP003392.1 | 0.517678371 | 1.759650235 | 1.765160746  | 2.38E-14    | 5.98E-14    |
| ACAP1      | 0.646466929 | 2.365560149 | 1.871533371  | 1.08E-32    | 1.46E-31    |
| AL117209.1 | 0.194589444 | 0.608899265 | 1.64577012   | 3.34E-11    | 6.89E-11    |
| NLRP3P1    | 0.004716156 | 0.603159632 | 6.998784646  | 3.07E-34    | 5.58E-33    |
| AC012618.2 | 0.114513475 | 0.2729143   | 1.252930623  | 3.91E-07    | 6.28E-07    |
| HECW1      | 1.49880001  | 0.121962045 | -3.619303741 | 1.40E-12    | 3.15E-12    |
| SCARB1     | 2.450124358 | 34.56733916 | 3.818482674  | 1.22E-39    | 1.44E-37    |
| CASS4      | 0.50878411  | 1.223410827 | 1.26578343   | 4.95E-17    | 1.48E-16    |
| PTHLH      | 0.312913128 | 14.43224251 | 5.527389487  | 6.30E-36    | 1.75E-34    |
| CTNNA1     | 20.82053774 | 7.819279    | -1.412899839 | 9.64E-38    | 5.14E-36    |
| GABRR2     | 0.138140918 | 0.366496312 | 1.40765796   | 1.09E-09    | 2.05E-09    |
| RNU6-1053P | 0.406908222 | 1.325296027 | 1.703539308  | 6.40E-12    | 1.38E-11    |
| GAPLINC    | 0.085080507 | 0.369521722 | 2.118758632  | 7.04E-28    | 4.93E-27    |
| UBA52P3    | 0.132378857 | 0.432655967 | 1.708547585  | 1.25E-09    | 2.35E-09    |
| THEMIS2    | 2.093788319 | 8.922891776 | 2.091395748  | 2.43E-33    | 3.67E-32    |
| SH3RF3     | 1.379779321 | 3.12676427  | 1.180232913  | 1.23E-21    | 5.14E-21    |
| IGHV3-23   | 15.06798929 | 75.58112064 | 2.326538996  | 9.28E-06    | 1.37E-05    |
| RNU1-67P   | 0.046360858 | 0.885557967 | 4.255607573  | 3.00E-16    | 8.53E-16    |
| RNU6-564P  | 0.051815713 | 0.293268255 | 2.500759361  | 4.97E-11    | 1.01E-10    |
| PFN1P6     | 0.17861499  | 1.02713464  | 2.523700244  | 5.89E-25    | 3.19E-24    |
| RNU6ATAC2  | 0.071486968 | 0.273367648 | 1.935090347  | 5.64E-05    | 7.88E-05    |
| GYPC       | 9.83688675  | 19.97347257 | 1.021811482  | 1.74E-26    | 1.07E-25    |
| DEFB1      | 841.20163   | 207.3787319 | -2.020183702 | 1.15E-34    | 2.29E-33    |
| ADORA2A    | 0.104148646 | 0.286872569 | 1.461765938  | 2.02E-22    | 8.92E-22    |
| RPL37P23   | 0.250534523 | 0.581062338 | 1.213683531  | 1.39E-15    | 3.80E-15    |
| AL357060.1 | 0.132084163 | 0.704163061 | 2.414452053  | 1.07E-39    | 1.33E-37    |
| IGLC2      | 44.5174044  | 228.6131896 | 2.360467257  | 4.17E-09    | 7.58E-09    |
| IGKV1-16   | 3.66623047  | 19.33284086 | 2.398684264  | 4.61E-06    | 6.93E-06    |
| PRR35      | 5.78884519  | 0.039927477 | -7.179749839 | 7.00E-47    | 5.76E-44    |
| NR5A2      | 0.501486453 | 1.219608861 | 1.282135903  | 8.90E-20    | 3.23E-19    |
| FER1L6     | 1.134488088 | 0.164301779 | -2.787621455 | 1.37E-39    | 1.61E-37    |
| MYOZ1      | 2.525932714 | 0.942535402 | -1.422197496 | 6.60E-31    | 6.62E-30    |
| MIR374B    | 0.123784107 | 0.50486769  | 2.028079257  | 2.88E-06    | 4.38E-06    |
| AC027644.2 | 0.133021748 | 0.355909853 | 1.419849733  | 9.92E-05    | 0.000136463 |
| MIR6512    | 0.196620936 | 0.427774178 | 1.121432451  | 0.000179312 | 0.00024257  |
| AC093616.1 | 0.170339962 | 0.701585016 | 2.042201004  | 6.50E-29    | 5.12E-28    |
| MYH10      | 31.39399342 | 9.501357385 | -1.724283016 | 3.65E-36    | 1.07E-34    |
| IBSP       | 0.021935604 | 0.827301317 | 5.237066521  | 1.23E-21    | 5.10E-21    |
| RPS8       | 174.3955486 | 350.7467918 | 1.008066692  | 1.59E-29    | 1.34E-28    |
| LPXN       | 3.950287222 | 9.938450486 | 1.331063383  | 8.55E-33    | 1.17E-31    |
| RDH5       | 0.857347276 | 2.117810726 | 1.304622053  | 3.38E-17    | 1.02E-16    |
| AC009533.1 | 0.258111078 | 1.297927696 | 2.330146049  | 3.49E-23    | 1.63E-22    |
| ATP12A     | 4.346723687 | 0.029698188 | -7.193409661 | 1.79E-43    | 1.05E-40    |
| AC124016.2 | 0.558243788 | 1.207655684 | 1.113241988  | 3.08E-10    | 5.98E-10    |

Table S1. The differentially expressed genes(DEGs) were screened out in TCGA

| ID         | conMean     | treatMean   | logFC        | pValue      | FDR         |
|------------|-------------|-------------|--------------|-------------|-------------|
| CHRNA1     | 0.009914517 | 0.424061477 | 5.418587067  | 8.61E-31    | 8.50E-30    |
| AL033519.2 | 0.193275437 | 0.396249857 | 1.035752118  | 4.56E-12    | 9.94E-12    |
| RN7SL558P  | 0.047308392 | 0.364864947 | 2.947194538  | 6.92E-14    | 1.69E-13    |
| MIR1285-1  | 0.279502017 | 1.018080886 | 1.864921589  | 2.48E-12    | 5.50E-12    |
| AC025171.2 | 0.447331908 | 1.245729831 | 1.477573641  | 4.99E-26    | 2.97E-25    |
| AQP4       | 1.710380198 | 0.702657326 | -1.283423867 | 1.09E-13    | 2.64E-13    |
| AL157871.2 | 0.09581481  | 0.533825767 | 2.478048377  | 5.99E-16    | 1.67E-15    |
| AC110015.1 | 0.044357726 | 0.27691196  | 2.642170049  | 5.82E-23    | 2.68E-22    |
| TBX3       | 6.350419642 | 1.790014118 | -1.826880964 | 3.36E-33    | 4.97E-32    |
| TRIM60P18  | 0.850068285 | 1.965041381 | 1.208909053  | 8.96E-23    | 4.07E-22    |
| AC114760.2 | 0.0396378   | 0.24355636  | 2.619306869  | 9.84E-15    | 2.53E-14    |
| SLC45A2    | 0.05818203  | 0.260007386 | 2.159907077  | 3.97E-11    | 8.16E-11    |
| RNU6ATAC2  | 0.237891463 | 0.602951861 | 1.341739327  | 3.99E-07    | 6.42E-07    |
| AC007619.1 | 0.200898358 | 0.447548944 | 1.155579693  | 3.62E-07    | 5.83E-07    |
| AC079322.1 | 0.100086147 | 0.429485207 | 2.101366135  | 2.01E-21    | 8.25E-21    |
| DEPP1      | 27.14535215 | 129.6864656 | 2.256250819  | 7.03E-33    | 9.77E-32    |
| LINC02027  | 3.339307601 | 1.436699321 | -1.216790834 | 4.03E-07    | 6.48E-07    |
| CAPN15     | 2.82624294  | 7.042157595 | 1.31713203   | 1.92E-34    | 3.65E-33    |
| SCARNA5    | 0.200124987 | 52.75781533 | 8.042339704  | 1.61E-07    | 2.66E-07    |
| AC108463.2 | 0.294182831 | 1.337661305 | 2.184927916  | 1.13E-32    | 1.53E-31    |
| ARHGDI3    | 40.47512806 | 127.8264013 | 1.659078291  | 5.71E-35    | 1.24E-33    |
| CYTOR      | 1.49133694  | 5.177977986 | 1.795782587  | 3.00E-30    | 2.76E-29    |
| IL34       | 1.862572189 | 4.495850981 | 1.271297875  | 9.75E-13    | 2.22E-12    |
| AC133644.2 | 0.168096263 | 1.568148095 | 3.221702259  | 5.92E-15    | 1.55E-14    |
| FLT4       | 4.349304556 | 9.914092772 | 1.188696023  | 3.22E-16    | 9.14E-16    |
| RASD2      | 0.602515363 | 4.563982581 | 2.921223353  | 2.57E-36    | 7.96E-35    |
| FO393401.1 | 0.074205779 | 0.410289448 | 2.467038598  | 2.40E-33    | 3.64E-32    |
| TAS2R20    | 0.0960179   | 0.400112361 | 2.059029916  | 1.90E-23    | 9.14E-23    |
| AC129492.1 | 0.275619812 | 0.698306046 | 1.341179872  | 1.81E-09    | 3.37E-09    |
| SNORA74B   | 0.124356876 | 10.28181924 | 6.369465468  | 7.90E-06    | 1.17E-05    |
| GALNT14    | 23.56257244 | 51.17547492 | 1.118955532  | 1.43E-25    | 8.22E-25    |
| RNA5SP108  | 0.09527334  | 0.387099108 | 2.022558507  | 5.99E-13    | 1.38E-12    |
| BIRC6-AS2  | 0.040059487 | 0.222211266 | 2.471716126  | 1.73E-09    | 3.23E-09    |
| LINC00885  | 0.746540432 | 0.157909883 | -2.241118931 | 1.68E-36    | 5.56E-35    |
| HNRNPA1P5' | 0.083392509 | 0.256022707 | 1.618282072  | 2.73E-15    | 7.30E-15    |
| AC015727.1 | 0.11786545  | 0.403973364 | 1.777119293  | 1.10E-12    | 2.48E-12    |
| WFDC2      | 115.4656713 | 50.32470087 | -1.198125395 | 1.26E-22    | 5.63E-22    |
| GATA5      | 0.860232943 | 0.201383656 | -2.094780781 | 4.35E-22    | 1.88E-21    |
| AC093496.1 | 3.372014013 | 0.366625623 | -3.201231009 | 1.12E-25    | 6.50E-25    |
| FLRT1      | 2.268199999 | 0.126036994 | -4.169628703 | 1.09E-37    | 5.63E-36    |
| WDR54      | 5.021784181 | 11.07302974 | 1.140778085  | 1.06E-28    | 8.11E-28    |
| ELMO1      | 1.445801311 | 5.114068108 | 1.82260207   | 1.01E-33    | 1.65E-32    |
| IGHV6-1    | 0.342533854 | 2.469780651 | 2.850064429  | 3.39E-06    | 5.14E-06    |
| SLC4A1     | 48.75202    | 4.206311193 | -3.534834504 | 5.81E-38    | 3.37E-36    |
| ITGA6-AS1  | 0.155973861 | 1.231354903 | 2.980870456  | 1.15E-35    | 2.96E-34    |
| GLOD5      | 3.269687926 | 0.62183194  | -2.394556319 | 9.28E-34    | 1.54E-32    |
| PDE8B      | 3.406938569 | 1.637623751 | -1.056872003 | 4.57E-21    | 1.82E-20    |
| AC005696.3 | 0.085639204 | 0.268126081 | 1.646568273  | 2.50E-09    | 4.62E-09    |
| AC112484.3 | 0.162960469 | 0.368869838 | 1.178589784  | 0.001446536 | 0.001840282 |
| AC010976.1 | 0.072017193 | 0.241902787 | 1.748014117  | 2.63E-15    | 7.04E-15    |
| SOWAHA     | 5.387074083 | 0.615433943 | -3.129825984 | 1.31E-40    | 2.58E-38    |
| AGXT2      | 32.33866855 | 14.88963982 | -1.118951426 | 0.005501978 | 0.006694331 |
| SKA1       | 0.134348722 | 0.577037356 | 2.102682122  | 5.82E-34    | 1.00E-32    |
| MUC13      | 7.263092983 | 1.336993377 | -2.44159173  | 3.06E-09    | 5.62E-09    |
| LINC02532  | 9.270650042 | 19.12120944 | 1.044431372  | 1.07E-15    | 2.95E-15    |

Table S1. The differentially expressed genes(DEGs) were screened out in TCGA

| ID         | conMean     | treatMean   | logFC        | pValue      | FDR         |
|------------|-------------|-------------|--------------|-------------|-------------|
| AL022718.1 | 0.112709721 | 0.264979666 | 1.233269707  | 0.007274962 | 0.008774278 |
| MTMR9LP    | 1.2376124   | 3.398717789 | 1.457431017  | 3.44E-08    | 5.91E-08    |
| IGLL5      | 2.897181959 | 19.21974518 | 2.729867007  | 9.41E-08    | 1.57E-07    |
| GABRA2     | 2.319220942 | 0.083128469 | -4.802153821 | 2.33E-40    | 3.95E-38    |
| NTM        | 0.671986411 | 2.240970853 | 1.737619921  | 1.39E-09    | 2.61E-09    |
| AC007406.4 | 0.163163813 | 0.469915929 | 1.526081549  | 0.001455587 | 0.001851339 |
| JCHAIN     | 33.24663349 | 82.48492357 | 1.310922188  | 1.98E-05    | 2.86E-05    |
| IGKV2-28   | 0.094094636 | 1.795693071 | 4.254284486  | 5.46E-05    | 7.63E-05    |
| LCN1P1     | 0.070331777 | 0.21768309  | 1.629980763  | 9.62E-11    | 1.93E-10    |
| BCAN       | 0.156655338 | 0.616614545 | 1.976774987  | 5.38E-26    | 3.20E-25    |
| AC004967.1 | 2.409503804 | 4.835612784 | 1.004962645  | 1.42E-20    | 5.45E-20    |
| TWSG1      | 30.57066375 | 13.42510519 | -1.187214484 | 2.10E-33    | 3.21E-32    |
| RTN4R      | 0.46910271  | 0.974716441 | 1.055078746  | 4.14E-12    | 9.06E-12    |
| AC099684.2 | 1.919925497 | 0.485309291 | -1.984073941 | 1.38E-15    | 3.76E-15    |
| C16orf45   | 7.648834736 | 3.668634243 | -1.0599969   | 4.74E-33    | 6.84E-32    |
| LY86       | 1.905317428 | 10.66029259 | 2.484143758  | 1.00E-34    | 2.04E-33    |
| SNORA23    | 0.133256569 | 8.742214109 | 6.035720153  | 0.010499647 | 0.012499522 |
| AC027644.1 | 0.615532269 | 1.597440549 | 1.375855843  | 1.97E-11    | 4.14E-11    |
| ERBB2      | 35.63789492 | 12.91565293 | -1.464291542 | 2.79E-37    | 1.26E-35    |
| SLAMF7     | 0.648377985 | 4.704244136 | 2.859055922  | 7.07E-30    | 6.20E-29    |
| AL031123.1 | 10.58834317 | 0.906174057 | -3.54654486  | 1.09E-39    | 1.34E-37    |
| SLC43A2    | 18.68026072 | 8.808725565 | -1.084509379 | 9.68E-29    | 7.47E-28    |
| EVI2B      | 3.330214731 | 13.03070022 | 1.968227502  | 1.87E-28    | 1.40E-27    |
| PTCRA      | 0.030712418 | 0.231175395 | 2.912093842  | 4.22E-33    | 6.15E-32    |
| LINC00342  | 0.591508676 | 3.152218238 | 2.413896187  | 6.71E-27    | 4.29E-26    |
| FAM110A    | 2.005331454 | 4.387516887 | 1.129563964  | 1.37E-28    | 1.04E-27    |
| LINC01770  | 0.433212715 | 1.039776138 | 1.263125461  | 5.51E-12    | 1.20E-11    |
| ZNF197-AS1 | 0.674898457 | 0.252895598 | -1.416128533 | 2.08E-29    | 1.72E-28    |
| AC005674.2 | 0.268052131 | 0.76060599  | 1.504635696  | 2.70E-11    | 5.61E-11    |
| RPL41P2    | 0.938775388 | 2.107045371 | 1.166369456  | 7.04E-12    | 1.52E-11    |
| CPAMD8     | 5.930039749 | 0.854294691 | -2.795236053 | 4.62E-39    | 3.95E-37    |
| ASIP       | 0.185070003 | 0.561546097 | 1.601333385  | 3.50E-05    | 4.96E-05    |
| RGS10      | 6.044428903 | 18.56216488 | 1.61868704   | 4.70E-31    | 4.80E-30    |
| PTPN13     | 16.96199097 | 4.817310848 | -1.816005596 | 6.83E-39    | 5.41E-37    |
| RNU6-196P  | 0.074188073 | 0.292009846 | 1.976757843  | 6.29E-07    | 9.98E-07    |
| AC004024.1 | 0.709044819 | 0.314317142 | -1.17365587  | 1.90E-26    | 1.17E-25    |
| AL645939.3 | 0.314076355 | 0.920294123 | 1.550979679  | 2.13E-15    | 5.74E-15    |
| IBA57-DT   | 0.121534298 | 0.337348916 | 1.472878015  | 1.02E-11    | 2.18E-11    |
| KIF2C      | 0.530609532 | 1.461630604 | 1.461856249  | 3.37E-29    | 2.74E-28    |
| CRYZL2P-SE | 0.100537364 | 0.337087303 | 1.745390514  | 9.08E-20    | 3.30E-19    |
| AC087163.3 | 0.077597036 | 0.280426138 | 1.853547371  | 6.20E-17    | 1.84E-16    |
| AC002511.2 | 0.210363614 | 0.688537418 | 1.710649872  | 0.015746071 | 0.018469696 |
| RPL3P4     | 12.01027469 | 30.57338526 | 1.348007156  | 1.56E-12    | 3.49E-12    |
| NELL2      | 0.258981066 | 0.693991913 | 1.422072226  | 1.59E-09    | 2.97E-09    |
| APOBEC3D   | 0.729074669 | 2.993356202 | 2.037625483  | 6.35E-35    | 1.36E-33    |
| GPR65      | 0.624472513 | 2.379821988 | 1.930143688  | 2.25E-28    | 1.66E-27    |
| OGDHL      | 64.02705629 | 16.169257   | -1.985428296 | 1.51E-30    | 1.44E-29    |
| LIN52      | 5.398752042 | 2.588698076 | -1.060399246 | 1.31E-33    | 2.09E-32    |
| AC091959.1 | 0.028744511 | 0.25847031  | 3.168640195  | 4.12E-11    | 8.45E-11    |
| SNORD117   | 0.180261794 | 0.927368069 | 2.363048396  | 1.05E-13    | 2.52E-13    |
| RNU6-5P    | 0.119976649 | 0.377392757 | 1.653313096  | 1.45E-06    | 2.25E-06    |
| MRAP2      | 2.947445291 | 0.286314374 | -3.363793027 | 5.77E-39    | 4.77E-37    |
| AVPR2      | 7.926016222 | 0.725834401 | -3.44888358  | 5.62E-39    | 4.66E-37    |
| AC068987.3 | 0.112252142 | 0.266406022 | 1.246883718  | 3.92E-06    | 5.92E-06    |
| IQCA1-AS1  | 0.151347304 | 0.339075011 | 1.163741489  | 8.94E-07    | 1.40E-06    |



Table S1. The differentially expressed genes(DEGs) were screened out in TCGA

| ID         | conMean     | treatMean   | logFC        | pValue      | FDR         |
|------------|-------------|-------------|--------------|-------------|-------------|
| IGLV3-10   | 4.086395064 | 36.00517493 | 3.139303683  | 1.93E-05    | 2.78E-05    |
| RPS19P3    | 0.207425185 | 0.728064602 | 1.811475395  | 8.05E-25    | 4.32E-24    |
| LHFPL2     | 1.99220945  | 7.892943931 | 1.986194168  | 6.03E-33    | 8.49E-32    |
| AC110799.1 | 0.027079654 | 0.302324918 | 3.480818679  | 4.61E-26    | 2.75E-25    |
| IL12RB2    | 0.18194062  | 1.165041818 | 2.678842156  | 0.004842922 | 0.005916572 |
| AC093484.4 | 0.161109073 | 0.557765226 | 1.791620251  | 6.04E-13    | 1.39E-12    |
| AP003555.3 | 0.088634251 | 0.232956736 | 1.394125831  | 3.49E-08    | 6.00E-08    |
| LHFPL3     | 0.74458489  | 0.289936234 | -1.360700698 | 3.95E-25    | 2.17E-24    |
| CCNO       | 1.368027039 | 0.564324878 | -1.27749889  | 2.07E-18    | 6.79E-18    |
| AP002360.3 | 0.333514189 | 1.383087376 | 2.052072255  | 5.50E-18    | 1.75E-17    |
| PURPL      | 0.064544492 | 0.483354356 | 2.904715345  | 6.28E-06    | 9.36E-06    |
| TLR6       | 0.222823465 | 0.765516281 | 1.780531891  | 1.17E-26    | 7.32E-26    |
| SYTL5      | 0.89612689  | 0.287677011 | -1.639253093 | 6.08E-31    | 6.13E-30    |
| IGHV1-3    | 0.223389594 | 1.822157704 | 3.028013936  | 1.16E-05    | 1.69E-05    |
| TRBV7-6    | 0.097191294 | 0.779281389 | 3.003245367  | 4.79E-17    | 1.44E-16    |
| NOS2       | 0.59413861  | 1.204800056 | 1.019922293  | 0.002423956 | 0.003028364 |
| AL359092.1 | 0.047416596 | 0.27266807  | 2.523681764  | 6.15E-05    | 8.58E-05    |
| PROM2      | 28.94209932 | 2.420898455 | -3.5795551   | 1.99E-39    | 2.10E-37    |
| TRBV13     | 0.06753949  | 0.642841843 | 3.250660639  | 6.13E-15    | 1.60E-14    |
| ADAMTS8    | 0.766713247 | 0.327941721 | -1.225247655 | 1.02E-31    | 1.15E-30    |
| ANKRD13B   | 0.53353215  | 1.438103468 | 1.430520364  | 2.50E-22    | 1.10E-21    |
| MIR3653    | 0.434865843 | 1.142599617 | 1.393677651  | 2.10E-13    | 4.99E-13    |
| AC073957.3 | 0.336633615 | 0.794259792 | 1.238431727  | 2.20E-07    | 3.60E-07    |
| INF2       | 6.799292792 | 17.0901412  | 1.329707715  | 3.03E-28    | 2.21E-27    |
| HIST1H3B   | 0.020438769 | 0.540657458 | 4.725334617  | 7.74E-08    | 1.30E-07    |
| AP003484.1 | 0.016846087 | 0.290150652 | 4.106316712  | 1.37E-17    | 4.25E-17    |
| SNAI3      | 0.424890299 | 1.060103251 | 1.319042477  | 5.28E-27    | 3.41E-26    |
| RAP2C-AS1  | 1.250433854 | 0.554320113 | -1.173637483 | 1.23E-33    | 1.96E-32    |
| CDHR5      | 21.29616201 | 46.34265821 | 1.121747348  | 2.67E-08    | 4.62E-08    |
| AC245100.2 | 0.111980422 | 0.287562343 | 1.360628238  | 4.50E-08    | 7.67E-08    |
| LHFPL3-AS2 | 8.787694431 | 3.668862503 | -1.260151867 | 1.08E-23    | 5.27E-23    |
| FMO4       | 13.0881996  | 5.233469072 | -1.322427177 | 7.17E-20    | 2.62E-19    |
| MIR6509    | 0.153123243 | 0.540397172 | 1.819326833  | 1.66E-07    | 2.74E-07    |
| IGHV4-59   | 5.931061566 | 31.93591725 | 2.428817635  | 2.74E-05    | 3.91E-05    |
| CEBPB      | 9.480237    | 24.14280419 | 1.348598224  | 2.01E-18    | 6.60E-18    |
| SNORA9B    | 0.102304151 | 0.418342557 | 2.031820087  | 2.96E-12    | 6.54E-12    |
| SLC6A3     | 0.593973177 | 42.62205684 | 6.165058623  | 1.96E-31    | 2.12E-30    |
| DNM3       | 1.451464525 | 0.642009932 | -1.17684179  | 1.74E-25    | 9.90E-25    |
| AC135068.2 | 0.076430972 | 0.308627933 | 2.013639357  | 4.62E-05    | 6.50E-05    |
| DPYS       | 36.99005904 | 14.36359881 | -1.36472034  | 0.002107752 | 0.002644709 |
| KLK7       | 4.020145442 | 0.074967631 | -5.744836073 | 4.42E-24    | 2.22E-23    |
| ETNPPL     | 1.252024841 | 0.215209912 | -2.540446754 | 9.20E-21    | 3.58E-20    |
| MIR659     | 0.977247269 | 0.487216918 | -1.004159417 | 1.08E-13    | 2.61E-13    |
| MAP9       | 4.146226181 | 1.723186217 | -1.266720204 | 4.91E-33    | 7.05E-32    |
| MTOR       | 9.448338153 | 4.229550758 | -1.159556164 | 8.30E-37    | 3.16E-35    |
| RGS14      | 4.573026472 | 11.91387454 | 1.381421496  | 6.75E-26    | 3.97E-25    |
| CLEC12A    | 0.197688489 | 1.434497766 | 2.859244951  | 1.03E-31    | 1.16E-30    |
| MIR499A    | 0.045923037 | 0.403001614 | 3.133495651  | 1.28E-14    | 3.27E-14    |
| FCER1G     | 9.167727556 | 53.05744517 | 2.532919132  | 2.30E-36    | 7.23E-35    |
| AL355309.1 | 0.24496819  | 0.653729057 | 1.416098399  | 0.001225949 | 0.001567594 |
| RPL12P10   | 0.056432751 | 0.444107923 | 2.976305725  | 1.34E-17    | 4.15E-17    |
| SORD2P     | 1.637897763 | 0.511294105 | -1.679620008 | 3.43E-25    | 1.90E-24    |
| AC010719.1 | 0.158760966 | 0.634456567 | 1.998665162  | 2.70E-12    | 5.97E-12    |
| RPRM       | 1.424327524 | 0.141879374 | -3.327544156 | 4.57E-37    | 1.90E-35    |
| AC103740.1 | 0.107899959 | 0.505373526 | 2.227655769  | 1.13E-27    | 7.73E-27    |

Table S1. The differentially expressed genes(DEGs) were screened out in TCGA

| ID         | conMean     | treatMean   | logFC        | pValue      | FDR         |
|------------|-------------|-------------|--------------|-------------|-------------|
| AC015712.2 | 0.232121878 | 0.480619563 | 1.050012864  | 6.73E-15    | 1.75E-14    |
| FAM153A    | 0.061901243 | 0.614541707 | 3.311470636  | 4.01E-09    | 7.30E-09    |
| SYN1       | 0.339540918 | 0.751360369 | 1.145919577  | 0.000125471 | 0.000171584 |
| MAPK4      | 2.663208699 | 0.163049901 | -4.029780013 | 2.19E-38    | 1.46E-36    |
| IGKV3-15   | 5.805712656 | 39.27893908 | 2.758210888  | 1.23E-06    | 1.92E-06    |
| ENPP2      | 23.147985   | 70.05449092 | 1.597590925  | 4.69E-11    | 9.59E-11    |
| FRMD7      | 1.402549824 | 0.10776412  | -3.702103197 | 1.06E-43    | 6.40E-41    |
| RPL21P136  | 0.027152176 | 0.258807825 | 3.252741518  | 5.50E-15    | 1.44E-14    |
| AC005532.2 | 0.05299806  | 0.448296202 | 3.080440823  | 1.83E-17    | 5.64E-17    |
| PDHB       | 21.86855007 | 9.711039788 | -1.171159887 | 3.87E-37    | 1.65E-35    |
| CBR1       | 56.00014792 | 27.86296553 | -1.007081822 | 1.83E-29    | 1.53E-28    |
| AL663070.1 | 0.147402869 | 0.325801973 | 1.144230734  | 1.93E-07    | 3.17E-07    |
| AC008543.3 | 0.060493478 | 0.221476893 | 1.872304682  | 2.84E-05    | 4.04E-05    |
| SIRPA      | 15.50138138 | 45.14401342 | 1.542137899  | 9.24E-33    | 1.26E-31    |
| GRAMD1A    | 4.960974681 | 12.30073406 | 1.310048913  | 4.40E-37    | 1.84E-35    |
| TMPRSS6    | 0.069317915 | 0.295344512 | 2.091098637  | 5.06E-13    | 1.17E-12    |
| AL021407.3 | 0.041406063 | 0.224180169 | 2.436744734  | 6.74E-19    | 2.29E-18    |
| AC090772.3 | 0.244647465 | 0.507035922 | 1.051383627  | 1.22E-12    | 2.75E-12    |
| AC011498.6 | 0.140205536 | 0.650710007 | 2.214471425  | 1.51E-22    | 6.72E-22    |
| DENND3     | 1.898102049 | 3.835897821 | 1.015006732  | 4.29E-25    | 2.35E-24    |
| BATF3      | 0.34201229  | 1.501586129 | 2.134367154  | 6.23E-31    | 6.26E-30    |
| AC136475.3 | 0.856646009 | 13.48917833 | 3.976959498  | 5.75E-18    | 1.83E-17    |
| AL158163.1 | 0.162386515 | 0.537603478 | 1.727110637  | 1.97E-21    | 8.09E-21    |
| AC007342.9 | 0.848837257 | 0.142547386 | -2.574046397 | 2.75E-37    | 1.25E-35    |
| AC084859.1 | 1.019802024 | 0.412992872 | -1.304100317 | 8.92E-22    | 3.76E-21    |
| AC025449.1 | 1.291535333 | 2.709148305 | 1.068752259  | 2.12E-21    | 8.70E-21    |
| RNU6-237P  | 0.053055301 | 0.302142807 | 2.509661778  | 6.22E-09    | 1.12E-08    |
| RPL30P7    | 0.100184982 | 0.879925891 | 3.134715758  | 3.72E-14    | 9.25E-14    |
| SLC7A8     | 56.28882894 | 4.899947328 | -3.522010488 | 1.81E-35    | 4.42E-34    |
| FSCN1      | 9.285839792 | 27.24454454 | 1.552863078  | 2.27E-27    | 1.52E-26    |
| LINC01589  | 1.196982837 | 0.192172886 | -2.63892576  | 9.18E-20    | 3.33E-19    |
| LINC02298  | 0.89206821  | 1.923469693 | 1.108485166  | 3.67E-16    | 1.04E-15    |
| MYDGF      | 22.95190583 | 53.27986178 | 1.214976386  | 5.62E-37    | 2.26E-35    |
| ALB        | 54.80645898 | 21.52170558 | -1.348553511 | 5.03E-16    | 1.41E-15    |
| MIR6746    | 0.061490035 | 0.416908791 | 2.761307266  | 2.51E-09    | 4.64E-09    |
| IGKC       | 69.86566755 | 432.7235856 | 2.630790172  | 4.55E-08    | 7.76E-08    |
| ETV7       | 0.654395974 | 4.278064482 | 2.708722451  | 8.20E-33    | 1.13E-31    |
| IKBIP      | 3.95600775  | 13.7519296  | 1.797516907  | 1.92E-36    | 6.25E-35    |
| NAPSB      | 2.800682515 | 9.098204151 | 1.699803358  | 4.08E-17    | 1.23E-16    |
| PRR16      | 0.459714799 | 1.570134612 | 1.772077237  | 7.81E-25    | 4.20E-24    |
| AC006064.3 | 0.165555254 | 1.109641934 | 2.744709517  | 6.22E-32    | 7.30E-31    |
| AC084357.2 | 0.185891434 | 0.379629496 | 1.030131793  | 6.95E-09    | 1.25E-08    |
| SNORD123   | 0.150153979 | 1.047172675 | 2.801984744  | 3.74E-16    | 1.06E-15    |
| U62317.1   | 0.174245529 | 1.083324874 | 2.636272412  | 1.10E-30    | 1.07E-29    |
| AC018682.1 | 0.076464423 | 0.295166162 | 1.948666777  | 1.41E-16    | 4.11E-16    |
| UGT1A8     | 0.090910173 | 0.299302478 | 1.719090572  | 0.029940156 | 0.034372828 |
| RNU6-315P  | 0.061335146 | 0.360041621 | 2.553377795  | 5.44E-06    | 8.13E-06    |
| AC244517.1 | 0.222550897 | 0.519900129 | 1.224099199  | 7.51E-05    | 0.000104124 |
| AC000123.2 | 0.562960053 | 1.481750112 | 1.396197708  | 1.96E-27    | 1.31E-26    |
| AC026992.1 | 1.142241219 | 0.471733738 | -1.27582266  | 3.93E-19    | 1.36E-18    |
| PGM5       | 7.027221042 | 2.987323218 | -1.234100939 | 1.34E-28    | 1.02E-27    |
| IRF8       | 2.671762379 | 5.705327584 | 1.094518021  | 5.28E-13    | 1.22E-12    |
| RASSF9     | 2.348302858 | 0.888559558 | -1.402078099 | 3.18E-29    | 2.60E-28    |
| STK10      | 2.866339944 | 6.655285731 | 1.215290885  | 1.93E-31    | 2.09E-30    |
| PBLD       | 37.69821967 | 16.90097934 | -1.157389546 | 4.98E-13    | 1.16E-12    |

Table S1. The differentially expressed genes(DEGs) were screened out in TCGA

| ID         | conMean     | treatMean   | logFC        | pValue      | FDR         |
|------------|-------------|-------------|--------------|-------------|-------------|
| RNA5SP78   | 0.079488159 | 0.377395489 | 2.2472653    | 2.10E-10    | 4.13E-10    |
| NRG3       | 0.320035543 | 1.272436077 | 1.99128914   | 1.12E-29    | 9.65E-29    |
| KCNJ13     | 3.301384003 | 0.639376054 | -2.368334338 | 1.52E-32    | 2.00E-31    |
| WBP1LP2    | 0.352951472 | 0.839924287 | 1.250789448  | 1.68E-29    | 1.42E-28    |
| JSRP1      | 0.140938841 | 0.75687628  | 2.42498824   | 2.27E-13    | 5.38E-13    |
| AC006441.1 | 0.071102076 | 0.244456241 | 1.781612657  | 8.52E-10    | 1.61E-09    |
| VWF        | 18.45550564 | 116.5560549 | 2.658900782  | 1.43E-32    | 1.89E-31    |
| APOBEC3G   | 1.122554896 | 5.688964697 | 2.34138013   | 1.89E-35    | 4.60E-34    |
| SLC18A2    | 0.146345756 | 0.616439357 | 2.074578071  | 5.65E-08    | 9.58E-08    |
| ZNF331     | 7.267121222 | 3.18999819  | -1.187828367 | 6.58E-20    | 2.41E-19    |
| TRAV8-2    | 1.889770391 | 0.677133581 | -1.480698583 | 2.97E-06    | 4.52E-06    |
| FABP1      | 26.40938491 | 1.126210216 | -4.551502653 | 3.06E-18    | 9.91E-18    |
| RN7SKP275  | 0.133887075 | 0.74990386  | 2.485688951  | 2.35E-18    | 7.70E-18    |
| RN7SL663P  | 0.082667577 | 0.335876811 | 2.022538689  | 6.79E-14    | 1.66E-13    |
| AC010186.3 | 0.686134993 | 1.376526571 | 1.004468107  | 1.03E-19    | 3.72E-19    |
| IGKV6-21   | 1.03289805  | 3.527769219 | 1.772058322  | 9.15E-05    | 0.00012603  |
| CYP2D7     | 0.061098965 | 0.365046052 | 2.578858628  | 1.39E-16    | 4.05E-16    |
| GRM1       | 1.026526231 | 0.095565601 | -3.425135278 | 1.58E-37    | 7.73E-36    |
| SEMA6D     | 9.514390299 | 1.26975477  | -2.905561315 | 1.35E-37    | 6.79E-36    |
| OPRL1      | 0.421510908 | 0.844054275 | 1.001765804  | 5.25E-19    | 1.80E-18    |
| ASF1B      | 0.718953047 | 3.162062183 | 2.136896278  | 2.21E-33    | 3.36E-32    |
| AL590369.1 | 0.607736082 | 0.289828453 | -1.068245715 | 9.39E-15    | 2.42E-14    |
| PRDM16     | 4.665680464 | 0.34676225  | -3.750068752 | 2.58E-40    | 4.22E-38    |
| CTGF       | 190.8310664 | 83.9272039  | -1.185085632 | 1.30E-19    | 4.66E-19    |
| NAP1L6     | 0.529346378 | 0.189558375 | -1.48156986  | 4.26E-29    | 3.42E-28    |
| RETN       | 0.080380331 | 0.512194119 | 2.671776271  | 1.36E-19    | 4.88E-19    |
| C10orf99   | 0.340605909 | 20.61363852 | 5.919351906  | 2.12E-23    | 1.01E-22    |
| AC012409.3 | 0.499784776 | 1.057593746 | 1.081406691  | 1.45E-06    | 2.25E-06    |
| LINC02048  | 0.02410485  | 1.285380424 | 5.736728126  | 3.02E-36    | 9.10E-35    |
| MBOAT2     | 6.588774389 | 2.229418146 | -1.563342896 | 8.02E-36    | 2.17E-34    |
| PTPRH      | 0.135557302 | 0.785517081 | 2.53473982   | 0.016108318 | 0.018879543 |
| CLSTN2     | 4.477918213 | 0.906867522 | -2.303864461 | 3.52E-36    | 1.04E-34    |
| FCRL6      | 0.193703582 | 1.134865804 | 2.550599173  | 1.21E-32    | 1.63E-31    |
| PAQR8      | 7.767148889 | 3.03719733  | -1.354644476 | 1.40E-14    | 3.57E-14    |
| ADORA1     | 3.49396714  | 1.625010184 | -1.104417281 | 1.96E-14    | 4.96E-14    |
| FAM81A     | 3.655935089 | 0.581940543 | -2.651296791 | 4.01E-39    | 3.56E-37    |
| LINC02511  | 0.043964082 | 0.603882625 | 3.779870903  | 7.14E-05    | 9.92E-05    |
| PHACTR1    | 3.1670587   | 1.487433118 | -1.090318808 | 2.97E-17    | 9.04E-17    |
| PGA5       | 0.086921574 | 0.444431012 | 2.354173295  | 3.53E-09    | 6.45E-09    |
| YBX2       | 0.280298438 | 0.698579402 | 1.317460402  | 0.009985376 | 0.011910024 |
| SCPEP1     | 36.81709557 | 16.03379685 | -1.199259719 | 2.01E-36    | 6.48E-35    |
| ELF5       | 11.67010111 | 0.047323242 | -7.94605242  | 4.78E-41    | 1.26E-38    |
| DPEP2      | 0.361325213 | 1.798371289 | 2.315321076  | 5.88E-37    | 2.35E-35    |
| MT3        | 0.906485847 | 8.786108145 | 3.276867857  | 1.05E-05    | 1.54E-05    |
| AL356356.1 | 0.133109945 | 0.801461282 | 2.590014468  | 2.64E-21    | 1.07E-20    |
| AC124067.2 | 0.123269369 | 0.278042418 | 1.173490644  | 0.000391386 | 0.000517026 |
| AF064858.2 | 0.910952535 | 3.877872546 | 2.089817598  | 3.33E-08    | 5.73E-08    |
| AC007038.2 | 0.503581722 | 1.409964141 | 1.485360646  | 5.12E-16    | 1.44E-15    |
| DNAH1      | 0.413578786 | 1.120771762 | 1.438258421  | 2.29E-16    | 6.55E-16    |
| MIR6757    | 0.214901508 | 0.939099809 | 2.127602889  | 9.04E-10    | 1.71E-09    |
| AL033384.2 | 0.172763993 | 0.514625301 | 1.574719823  | 1.79E-16    | 5.17E-16    |
| TRAV5      | 0.092755032 | 0.600441044 | 2.694525143  | 1.14E-18    | 3.82E-18    |
| SH3BP1     | 0.672830315 | 2.112300025 | 1.650500151  | 4.20E-30    | 3.79E-29    |
| AL358852.1 | 0.580712997 | 0.221528504 | -1.390332983 | 1.24E-24    | 6.59E-24    |
| AC073912.2 | 0.050980679 | 0.277327436 | 2.443567861  | 1.59E-13    | 3.78E-13    |

Table S1. The differentially expressed genes(DEGs) were screened out in TCGA

| ID         | conMean     | treatMean   | logFC        | pValue      | FDR         |
|------------|-------------|-------------|--------------|-------------|-------------|
| CDCA5      | 0.471204965 | 1.399565671 | 1.570552537  | 7.99E-30    | 6.94E-29    |
| ANKRD2     | 10.63591439 | 1.067385606 | -3.316790703 | 1.30E-35    | 3.30E-34    |
| CENPE      | 0.141142898 | 0.437663557 | 1.632665726  | 1.36E-28    | 1.04E-27    |
| ARHGAP42   | 2.805044653 | 7.038345746 | 1.327212649  | 5.95E-22    | 2.54E-21    |
| RPS20      | 132.8400724 | 268.0015859 | 1.012551124  | 2.04E-28    | 1.52E-27    |
| CPN2       | 6.425652558 | 2.704812305 | -1.24831449  | 7.15E-14    | 1.74E-13    |
| ITLN1      | 2.467006215 | 0.196633673 | -3.649179045 | 2.05E-36    | 6.58E-35    |
| GPR141     | 0.126524831 | 0.660689293 | 2.384551415  | 1.56E-27    | 1.06E-26    |
| ATP11A     | 8.018090472 | 23.31906001 | 1.540179033  | 1.06E-21    | 4.44E-21    |
| AC060766.6 | 0.235000933 | 0.530846354 | 1.175627865  | 2.54E-12    | 5.63E-12    |
| MIR221     | 0.346671575 | 0.865591995 | 1.320117608  | 0.022265232 | 0.025857209 |
| SUCLG2     | 53.0390475  | 21.86739409 | -1.278273561 | 1.34E-36    | 4.67E-35    |
| IGKV1OR22- | 0.077996608 | 0.289275261 | 1.890959661  | 0.003839613 | 0.004725607 |
| LINC01929  | 0.041636436 | 0.486620094 | 3.546877407  | 3.06E-27    | 2.03E-26    |
| CDS1       | 15.01953874 | 5.613819195 | -1.419786002 | 1.22E-32    | 1.64E-31    |
| BAG1       | 20.13346401 | 8.229862317 | -1.290655213 | 9.52E-35    | 1.94E-33    |
| RNU6V      | 0.123982349 | 0.352383267 | 1.507010681  | 1.42E-05    | 2.06E-05    |
| PDE6G      | 1.806525897 | 0.815106971 | -1.148156627 | 1.02E-19    | 3.70E-19    |
| PXK        | 8.147173806 | 3.829444073 | -1.089164717 | 7.71E-35    | 1.60E-33    |
| LINC02542  | 0.199480918 | 0.653409974 | 1.711737726  | 8.58E-06    | 1.27E-05    |
| IGF2BP2    | 2.893530682 | 1.413791169 | -1.033261907 | 6.90E-23    | 3.16E-22    |
| SEMA6A-AS2 | 0.140508804 | 0.43234198  | 1.621512397  | 1.63E-18    | 5.40E-18    |
| AC005912.1 | 6.574553694 | 19.68909981 | 1.582432285  | 2.29E-18    | 7.50E-18    |
| AL450384.2 | 0.302826407 | 1.05262366  | 1.797426808  | 2.02E-20    | 7.67E-20    |
| AC005840.2 | 0.190084825 | 0.793156273 | 2.060961783  | 1.82E-22    | 8.07E-22    |
| DUTP6      | 0.305189135 | 0.838865185 | 1.458735372  | 2.50E-21    | 1.02E-20    |
| AC106782.5 | 0.193050133 | 0.495313209 | 1.35936555   | 3.21E-11    | 6.64E-11    |
| FAM171A1   | 34.25282844 | 7.709377679 | -2.151536812 | 3.94E-39    | 3.51E-37    |
| LRBA       | 13.47082047 | 6.000199505 | -1.166755348 | 1.87E-32    | 2.42E-31    |
| PREX2      | 1.238045343 | 5.347232305 | 2.110728201  | 7.27E-20    | 2.66E-19    |
| UGT8       | 24.84969878 | 7.249328525 | -1.777309088 | 9.39E-32    | 1.06E-30    |
| IGHV2-5    | 1.626936919 | 3.448719093 | 1.083902308  | 0.00297793  | 0.003695355 |
| TRBV5-5    | 0.044206428 | 0.312789636 | 2.822864647  | 8.54E-16    | 2.36E-15    |
| KCNK3      | 3.464236917 | 14.98458001 | 2.112869145  | 1.20E-18    | 3.99E-18    |
| AC008764.8 | 0.129767693 | 0.510344489 | 1.975540159  | 3.45E-20    | 1.29E-19    |
| PTPN22     | 0.326500886 | 1.408671588 | 2.109176494  | 1.28E-28    | 9.74E-28    |
| AL353152.1 | 2.991248158 | 0.170473751 | -4.133126088 | 2.50E-39    | 2.56E-37    |
| LRRC37A5P  | 0.479404452 | 0.231079468 | -1.052854226 | 1.58E-19    | 5.64E-19    |
| LINC00271  | 0.905164494 | 0.280097088 | -1.692253011 | 1.89E-36    | 6.15E-35    |
| CSAG1      | 0.039104925 | 0.276996601 | 2.824446068  | 3.81E-20    | 1.42E-19    |
| ADRA2C     | 8.260074147 | 2.971283164 | -1.475068631 | 2.05E-24    | 1.06E-23    |
| LINC00462  | 0.339391906 | 15.43996781 | 5.507573775  | 8.14E-35    | 1.69E-33    |
| HLA-J      | 1.269080317 | 6.961896228 | 2.455696934  | 2.81E-31    | 2.97E-30    |
| EPO        | 0.962355036 | 8.855615117 | 3.201951379  | 9.26E-09    | 1.65E-08    |
| CEL        | 3.982085128 | 0.537627863 | -2.888844249 | 5.23E-35    | 1.15E-33    |
| IGLV3-9    | 1.652075363 | 8.349854986 | 2.337471642  | 2.18E-05    | 3.13E-05    |
| TFAP2A     | 2.712707357 | 0.655883323 | -2.048222322 | 7.17E-34    | 1.21E-32    |
| SDHAP3     | 2.647056157 | 15.78444264 | 2.576042612  | 7.12E-35    | 1.50E-33    |
| HK2        | 1.589258743 | 17.0547609  | 3.423748599  | 2.37E-36    | 7.41E-35    |
| AL390728.4 | 3.023424819 | 7.849904157 | 1.376491334  | 1.31E-19    | 4.69E-19    |
| AP000894.4 | 3.705652086 | 1.14408092  | -1.69553834  | 4.01E-32    | 4.85E-31    |
| SCN4B      | 1.765081297 | 6.988504366 | 1.985249099  | 4.80E-22    | 2.06E-21    |
| VDR        | 10.8537089  | 3.359952172 | -1.691675519 | 2.80E-23    | 1.32E-22    |
| GJB1       | 20.40892603 | 7.54861327  | -1.434916725 | 1.01E-25    | 5.84E-25    |
| NPY6R      | 3.339575505 | 8.212190567 | 1.298102374  | 1.32E-10    | 2.63E-10    |

Table S1. The differentially expressed genes(DEGs) were screened out in TCGA

| ID         | conMean     | treatMean   | logFC        | pValue      | FDR         |
|------------|-------------|-------------|--------------|-------------|-------------|
| PCCA       | 19.67942326 | 7.331791955 | -1.424450187 | 1.57E-32    | 2.06E-31    |
| LY96       | 4.158937982 | 13.22779512 | 1.669285529  | 3.92E-25    | 2.16E-24    |
| AL356364.1 | 1.430962038 | 0.107294211 | -3.73734125  | 3.18E-18    | 1.03E-17    |
| IGHV4-55   | 0.661658323 | 1.828390464 | 1.466415886  | 0.000327645 | 0.000435338 |
| SCARA3     | 14.22936106 | 6.179813773 | -1.203235613 | 2.06E-07    | 3.38E-07    |
| SNORA66    | 0.432772066 | 1.605951953 | 1.891749444  | 3.75E-14    | 9.32E-14    |
| SUCLA2     | 26.78668    | 13.29967367 | -1.010124934 | 2.86E-36    | 8.70E-35    |
| SCX        | 0.266227499 | 0.677651223 | 1.347883335  | 8.73E-05    | 0.00012049  |
| AP003352.1 | 0.45892139  | 1.335152679 | 1.540685771  | 2.28E-24    | 1.18E-23    |
| GPC3       | 48.85896707 | 3.517973163 | -3.795806982 | 1.90E-40    | 3.47E-38    |
| AL137186.2 | 0.188834699 | 0.90609508  | 2.262538559  | 1.61E-37    | 7.86E-36    |
| AC144831.1 | 3.273022317 | 0.553122434 | -2.564952677 | 6.58E-35    | 1.40E-33    |
| AQP2       | 790.8741995 | 1.563995998 | -8.9820676   | 2.13E-43    | 1.22E-40    |
| CHMP4BP1   | 0.199940934 | 0.541711471 | 1.437950771  | 1.21E-06    | 1.89E-06    |
| ZNF346-IT1 | 0.137309065 | 0.362430455 | 1.400277314  | 4.18E-08    | 7.15E-08    |
| SLC2A12    | 3.539748913 | 0.332891282 | -3.410524036 | 1.12E-39    | 1.36E-37    |
| AFAP1L2    | 17.40745456 | 4.801922818 | -1.858021137 | 1.51E-31    | 1.66E-30    |
| TRAV8-4    | 0.152096451 | 0.656695569 | 2.110238227  | 1.80E-16    | 5.20E-16    |
| AC090970.1 | 0.044208799 | 0.285882767 | 2.693018213  | 0.011194352 | 0.013301935 |
| ADCY2      | 0.056779558 | 0.351482859 | 2.630010804  | 2.85E-06    | 4.34E-06    |
| CLK2       | 5.044888958 | 10.60115238 | 1.071326679  | 1.78E-21    | 7.33E-21    |
| TRBV10-2   | 0.041812886 | 0.420734824 | 3.330891707  | 1.44E-14    | 3.66E-14    |
| AC004975.1 | 0.150611888 | 0.429303681 | 1.51116289   | 2.31E-08    | 4.01E-08    |
| CSTA       | 0.574392105 | 2.820911127 | 2.296053391  | 6.88E-32    | 8.03E-31    |
| OLFM4      | 7.463201099 | 0.545578076 | -3.773936983 | 1.02E-36    | 3.70E-35    |
| AL158152.2 | 0.587771692 | 1.261249666 | 1.101526105  | 1.01E-15    | 2.78E-15    |
| IGHV5-51   | 11.71673263 | 56.41247575 | 2.267443943  | 6.29E-05    | 8.77E-05    |
| LINC02121  | 11.54835293 | 0.039456535 | -8.193207106 | 2.36E-65    | 1.62E-61    |
| RNVU1-15   | 0.081934051 | 0.411806368 | 2.329431085  | 4.17E-08    | 7.12E-08    |
| IKZF1      | 0.657617358 | 2.852471677 | 2.116892276  | 1.07E-28    | 8.16E-28    |
| WNT5A      | 2.707965281 | 1.072318992 | -1.336475101 | 4.91E-13    | 1.14E-12    |
| SLC25A4    | 27.37052386 | 12.12265987 | -1.174916768 | 7.24E-32    | 8.40E-31    |
| RNU1-61P   | 0.195670623 | 0.421823108 | 1.108210957  | 0.001965107 | 0.002472204 |
| AC008267.2 | 0.327395847 | 0.679511337 | 1.053461602  | 1.06E-08    | 1.88E-08    |
| CBWD4P     | 0.160200301 | 0.443237488 | 1.468203051  | 5.30E-13    | 1.23E-12    |
| HIF1A-AS2  | 0.328371353 | 6.148215444 | 4.226767543  | 1.10E-35    | 2.85E-34    |
| IGHV1-46   | 2.743081623 | 15.71182552 | 2.517981356  | 3.83E-06    | 5.78E-06    |
| AC006480.2 | 0.23559057  | 0.62539894  | 1.408494979  | 7.04E-09    | 1.26E-08    |
| IFNG       | 0.033548735 | 0.770130505 | 4.520772651  | 6.90E-30    | 6.08E-29    |
| C7         | 197.4646453 | 20.64507448 | -3.257724844 | 3.10E-36    | 9.31E-35    |
| RPL35AP32  | 0.068402578 | 0.395546606 | 2.531725079  | 1.58E-16    | 4.58E-16    |
| HHLA2      | 2.198480475 | 19.55388748 | 3.152876831  | 8.08E-24    | 3.98E-23    |
| RHOA-IT1   | 0.121514385 | 0.425607626 | 1.808396889  | 2.02E-12    | 4.50E-12    |
| AL138724.1 | 0.329561771 | 0.890932339 | 1.434766973  | 7.12E-32    | 8.27E-31    |
| ALDH5A1    | 13.0155959  | 6.345243701 | -1.036493885 | 4.30E-30    | 3.88E-29    |
| AC004067.1 | 0.180212229 | 0.58833131  | 1.706931899  | 2.16E-25    | 1.22E-24    |
| LINC01213  | 0.634512162 | 0.210699821 | -1.590458729 | 1.28E-36    | 4.48E-35    |
| SNORD93    | 0.077320328 | 0.630326737 | 3.027180201  | 4.08E-14    | 1.01E-13    |
| AC138466.4 | 0.053067813 | 0.222320006 | 2.066728784  | 0.016758906 | 0.019618603 |
| AQP5       | 1.125694435 | 0.172471152 | -2.706388289 | 3.63E-38    | 2.27E-36    |
| ACTRT3     | 2.281913744 | 0.660792448 | -1.787975156 | 1.29E-35    | 3.28E-34    |
| Z98200.1   | 0.066444658 | 0.221594925 | 1.73769971   | 3.25E-12    | 7.16E-12    |
| MCUB       | 1.083694832 | 3.357785803 | 1.631551651  | 1.60E-27    | 1.08E-26    |
| RN7SL34P   | 0.08672696  | 0.253937275 | 1.549919737  | 2.06E-08    | 3.59E-08    |
| AL353803.1 | 0.333955309 | 1.670054013 | 2.322167809  | 2.48E-08    | 4.30E-08    |

Table S1. The differentially expressed genes(DEGs) were screened out in TCGA

| ID         | conMean     | treatMean   | logFC        | pValue      | FDR         |
|------------|-------------|-------------|--------------|-------------|-------------|
| TACSTD2    | 177.3748228 | 15.51523219 | -3.515044051 | 8.40E-38    | 4.55E-36    |
| AMY2B      | 0.407151139 | 1.425070527 | 1.807396977  | 2.31E-14    | 5.79E-14    |
| TENT5B     | 5.932483567 | 0.979166188 | -2.599010554 | 1.41E-29    | 1.20E-28    |
| ENTPD2     | 2.156894928 | 5.178703673 | 1.263635111  | 1.33E-11    | 2.81E-11    |
| HTRA3      | 1.515763208 | 3.125201386 | 1.043904765  | 1.20E-07    | 2.00E-07    |
| GREM1      | 2.026311349 | 0.361915718 | -2.485130195 | 7.46E-07    | 1.18E-06    |
| MIOX       | 203.7872566 | 43.78182319 | -2.2186599   | 2.88E-06    | 4.39E-06    |
| AC026356.2 | 0.211542978 | 0.870792292 | 2.041377843  | 3.78E-28    | 2.74E-27    |
| PRSS53     | 0.054941561 | 0.64802855  | 3.560087575  | 1.19E-33    | 1.90E-32    |
| PLEKHO1    | 2.423417603 | 8.300898816 | 1.776224528  | 1.53E-32    | 2.02E-31    |
| ALDOB      | 1633.284657 | 63.12515953 | -4.693417314 | 3.15E-20    | 1.18E-19    |
| LIG1       | 2.114498583 | 4.383243438 | 1.051683212  | 6.49E-32    | 7.59E-31    |
| TRAC       | 4.743952097 | 20.71046861 | 2.12619885   | 4.54E-23    | 2.11E-22    |
| ABAT       | 20.19248172 | 2.561271717 | -2.978886016 | 2.05E-25    | 1.16E-24    |
| CASZ1      | 1.809800976 | 0.449121786 | -2.010652441 | 4.64E-37    | 1.93E-35    |
| VAX2       | 0.143273485 | 0.331031527 | 1.208196988  | 8.89E-05    | 0.000122546 |
| EPOP       | 0.444973932 | 0.965302177 | 1.117259812  | 3.80E-16    | 1.07E-15    |
| SNHG26     | 0.169398213 | 0.703647143 | 2.054433488  | 1.99E-34    | 3.77E-33    |
| AL022068.1 | 0.53255401  | 0.214820159 | -1.309798461 | 2.97E-13    | 6.97E-13    |
| UPK1A      | 1.058490106 | 0.167192147 | -2.662428789 | 6.60E-11    | 1.33E-10    |
| ADAM28     | 0.9447953   | 2.418892919 | 1.356273212  | 4.92E-21    | 1.96E-20    |
| TMEM91     | 1.316735075 | 17.13261506 | 3.701708364  | 3.30E-36    | 9.81E-35    |
| DOCK8      | 3.243174861 | 7.619177777 | 1.232228507  | 3.91E-27    | 2.55E-26    |
| AC243829.4 | 0.009532238 | 0.255826956 | 4.746209536  | 1.09E-33    | 1.78E-32    |
| VSIG1      | 0.073522565 | 1.1310414   | 3.943320824  | 4.20E-34    | 7.44E-33    |
| PEAK3      | 0.177523565 | 0.486136274 | 1.453350243  | 9.64E-22    | 4.04E-21    |
| AC018644.1 | 0.064440033 | 0.281097144 | 2.125039654  | 3.43E-15    | 9.11E-15    |
| LINC01985  | 0.096907303 | 0.224212132 | 1.210187049  | 3.32E-06    | 5.03E-06    |
| RASGRP2    | 0.901607515 | 1.940854199 | 1.106120297  | 9.59E-17    | 2.82E-16    |
| PFN2       | 50.62574597 | 23.62441845 | -1.099592446 | 9.88E-34    | 1.62E-32    |
| EWSAT1     | 0.747417201 | 0.223222462 | -1.743431561 | 4.74E-27    | 3.08E-26    |
| DDIT4      | 32.32598861 | 145.0282952 | 2.165568002  | 2.24E-31    | 2.40E-30    |
| SLC6A17    | 1.308381495 | 0.187985077 | -2.799093218 | 2.00E-36    | 6.44E-35    |
| DUSP15     | 4.627770774 | 1.908322564 | -1.278012355 | 2.85E-34    | 5.18E-33    |
| AC026691.1 | 0.852002926 | 0.327005342 | -1.381544183 | 5.39E-24    | 2.70E-23    |
| AC138150.2 | 0.191527303 | 0.503070358 | 1.393210114  | 1.60E-19    | 5.71E-19    |
| IGHV4-4    | 0.596255098 | 2.784694064 | 2.223517237  | 0.000209519 | 0.000282045 |
| AJ009632.2 | 0.249405544 | 0.718947628 | 1.527393146  | 3.26E-06    | 4.94E-06    |
| LINC00892  | 0.094824289 | 0.259676442 | 1.45338658   | 1.16E-16    | 3.39E-16    |
| AC010809.2 | 0.181627526 | 0.419377934 | 1.207268091  | 1.50E-08    | 2.64E-08    |
| DPH6-DT    | 1.391908185 | 0.523195944 | -1.411640788 | 3.23E-29    | 2.64E-28    |
| CCDC127    | 2.233429819 | 4.614903889 | 1.04703968   | 3.94E-35    | 8.82E-34    |
| AC233266.2 | 0.111956039 | 0.251464734 | 1.167423731  | 0.007636607 | 0.009194296 |
| AC245140.2 | 0.335995371 | 0.813549486 | 1.275788748  | 4.56E-26    | 2.73E-25    |
| TRBV7-3    | 0.406110911 | 0.945351092 | 1.218976441  | 7.44E-05    | 0.000103171 |
| MIR4326    | 0.097745146 | 0.525520423 | 2.426649868  | 7.19E-09    | 1.29E-08    |
| KIAA0895L  | 1.434815147 | 6.152614144 | 2.100334637  | 1.72E-30    | 1.63E-29    |
| ADAMTS15   | 6.290947799 | 1.576558163 | -1.996498995 | 1.60E-24    | 8.35E-24    |
| FRZB       | 14.50754547 | 45.83801213 | 1.659741029  | 7.56E-13    | 1.73E-12    |
| MIR3609    | 0.386636506 | 18.58307157 | 5.586867312  | 0.00018316  | 0.000247565 |
| SPON2      | 4.512449071 | 14.75412186 | 1.709135502  | 5.89E-17    | 1.75E-16    |
| COL4A3     | 9.259925542 | 2.441788936 | -1.923062091 | 3.33E-35    | 7.61E-34    |
| TMEM173    | 9.211673472 | 19.02865531 | 1.046638437  | 6.75E-23    | 3.09E-22    |
| RN7SL834P  | 0.239019111 | 1.24867322  | 2.385198092  | 6.38E-23    | 2.93E-22    |
| GCNT3      | 8.368454717 | 2.369634876 | -1.820296466 | 0.019747801 | 0.023023259 |

Table S1. The differentially expressed genes(DEGs) were screened out in TCGA

| ID         | conMean     | treatMean   | logFC        | pValue      | FDR         |
|------------|-------------|-------------|--------------|-------------|-------------|
| CILP2      | 0.062836322 | 0.391584235 | 2.639652031  | 0.00459175  | 0.005615728 |
| CD74       | 419.7033403 | 1411.712739 | 1.750004703  | 1.32E-30    | 1.27E-29    |
| AL591845.1 | 0.967887443 | 2.545007486 | 1.39475871   | 2.79E-08    | 4.82E-08    |
| CWH43      | 5.494279625 | 1.088503335 | -2.335584509 | 2.69E-37    | 1.23E-35    |
| TMEM45B    | 18.58362124 | 1.20224281  | -3.950231452 | 1.09E-41    | 3.81E-39    |
| AC019257.2 | 0.106578481 | 0.231703642 | 1.120364543  | 0.002039955 | 0.002563234 |
| LSAMP      | 1.256063177 | 0.22611327  | -2.473791466 | 4.16E-35    | 9.29E-34    |
| AC004832.5 | 0.212312167 | 0.727070708 | 1.775908626  | 9.21E-23    | 4.18E-22    |
| NMUR1      | 0.568766867 | 1.22920387  | 1.111814885  | 1.89E-13    | 4.48E-13    |
| AL021707.3 | 0.332287322 | 0.895784617 | 1.430720641  | 9.77E-17    | 2.87E-16    |
| ITGB6      | 23.15368819 | 3.738364266 | -2.630762964 | 2.16E-32    | 2.76E-31    |
| POU3F4     | 0.835144528 | 0.156478307 | -2.416063221 | 5.73E-49    | 6.55E-46    |
| AC087284.1 | 0.018044317 | 0.253644979 | 3.813194183  | 4.37E-19    | 1.51E-18    |
| HOXB6      | 16.81898631 | 3.883185867 | -2.114778088 | 1.94E-34    | 3.68E-33    |
| BAIAP2L2   | 5.249974524 | 12.44906719 | 1.245655318  | 5.64E-10    | 1.08E-09    |
| AL513218.1 | 0.142617511 | 0.595938404 | 2.063012096  | 4.51E-15    | 1.19E-14    |
| CCR2       | 1.050009944 | 2.717554543 | 1.371906001  | 4.03E-15    | 1.06E-14    |
| AC007344.1 | 0.050753194 | 0.281360993 | 2.470851807  | 0.000442379 | 0.000582259 |
| AC015911.7 | 0.162196999 | 1.552927104 | 3.259171074  | 9.95E-35    | 2.02E-33    |
| CD1D       | 0.860631723 | 4.193998054 | 2.284858267  | 3.95E-36    | 1.15E-34    |
| CYP2A6     | 0.019672342 | 0.837936339 | 5.412599995  | 6.48E-07    | 1.03E-06    |
| CD163      | 4.77661625  | 17.76826151 | 1.89524165   | 1.13E-18    | 3.78E-18    |
| DCAF11     | 23.36091185 | 10.64946329 | -1.133315864 | 4.52E-40    | 6.84E-38    |
| LINC01315  | 1.054023569 | 2.570068371 | 1.285899611  | 1.28E-11    | 2.72E-11    |
| RN7SKP173  | 0.052262833 | 0.307925944 | 2.55872618   | 4.76E-16    | 1.34E-15    |
| MFAP3L     | 17.05089861 | 5.216904484 | -1.708581849 | 6.56E-33    | 9.19E-32    |
| RTCA-AS1   | 5.171181863 | 1.699710851 | -1.605204702 | 4.96E-35    | 1.09E-33    |
| RPS3AP38   | 0.08204843  | 0.315895997 | 1.944902027  | 3.24E-14    | 8.07E-14    |
| AC084824.1 | 0.796875654 | 1.646602804 | 1.047066062  | 1.75E-24    | 9.15E-24    |
| SNORD15B   | 0.174419887 | 6.66530525  | 5.256034503  | 1.26E-11    | 2.67E-11    |
| FBLN5      | 41.056555   | 12.51781969 | -1.713629277 | 7.81E-32    | 8.98E-31    |
| CRYZP1     | 0.109813916 | 0.297399656 | 1.437342088  | 3.76E-09    | 6.85E-09    |
| AC016876.2 | 0.147796569 | 0.590297167 | 1.997828644  | 2.94E-35    | 6.83E-34    |
| HOXA4      | 2.482873028 | 5.882780154 | 1.244487637  | 5.36E-22    | 2.29E-21    |
| PRKCA      | 8.382534028 | 3.659701811 | -1.19566033  | 9.88E-32    | 1.11E-30    |
| IGKV2-24   | 2.562533482 | 15.65721317 | 2.61118469   | 5.47E-05    | 7.64E-05    |
| DOC2GP     | 0.068241907 | 0.271246848 | 1.990876504  | 2.11E-14    | 5.31E-14    |
| AC114939.1 | 0.127972185 | 0.439929126 | 1.781440849  | 6.48E-14    | 1.58E-13    |
| COL14A1    | 16.21072846 | 6.853839199 | -1.241964673 | 3.05E-14    | 7.62E-14    |
| FAM3B      | 6.902502356 | 0.430629103 | -4.002601748 | 2.02E-40    | 3.58E-38    |
| ST3GAL6-AS | 2.028861533 | 0.556074906 | -1.867319269 | 1.75E-31    | 1.90E-30    |
| IGHV3-30   | 6.065975761 | 54.654816   | 3.171536989  | 2.24E-07    | 3.65E-07    |
| SMAD9-IT1  | 0.12419663  | 0.409204243 | 1.720195078  | 1.89E-10    | 3.73E-10    |
| AC000120.1 | 0.060980182 | 0.313825537 | 2.363550393  | 5.11E-17    | 1.53E-16    |
| SMIM24     | 172.2983811 | 70.91944676 | -1.280655959 | 5.81E-08    | 9.84E-08    |
| HIST1H2BL  | 0.044490352 | 0.352915892 | 2.987759994  | 5.08E-19    | 1.74E-18    |
| HIBADH     | 88.20252319 | 41.82693738 | -1.076387561 | 1.03E-31    | 1.16E-30    |
| AKNA       | 1.692198029 | 4.736547065 | 1.484937311  | 4.42E-29    | 3.55E-28    |
| CSF2RA     | 0.940421503 | 3.654180793 | 1.958168582  | 1.91E-30    | 1.81E-29    |
| LILRA5     | 0.773811113 | 1.84427015  | 1.252996646  | 9.27E-18    | 2.91E-17    |
| AC073575.2 | 0.140452414 | 0.399035432 | 1.506435432  | 1.12E-18    | 3.75E-18    |
| SNORD6     | 0.775640914 | 2.907899137 | 1.906516418  | 4.72E-19    | 1.62E-18    |
| TMPRSS2    | 21.22980094 | 1.59799953  | -3.731751955 | 2.14E-37    | 1.00E-35    |
| TMCC1      | 3.925239806 | 13.59209978 | 1.791915648  | 1.41E-35    | 3.55E-34    |
| CASP4      | 3.514193972 | 8.346382179 | 1.247957157  | 3.45E-34    | 6.23E-33    |

Table S1. The differentially expressed genes(DEGs) were screened out in TCGA

| ID          | conMean     | treatMean   | logFC        | pValue      | FDR         |
|-------------|-------------|-------------|--------------|-------------|-------------|
| LINP1       | 0.165611812 | 2.033279224 | 3.617930871  | 2.73E-36    | 8.38E-35    |
| RN7SL566P   | 0.134847849 | 0.352473227 | 1.386181169  | 9.03E-07    | 1.42E-06    |
| RNF166      | 2.037512922 | 5.059567166 | 1.312204762  | 9.34E-36    | 2.49E-34    |
| GALNT5      | 0.217060197 | 0.759312934 | 1.806599385  | 0.018455801 | 0.021552355 |
| HLA-L       | 0.832115805 | 2.433738542 | 1.548317961  | 2.84E-21    | 1.15E-20    |
| TRBV10-3    | 0.188714398 | 0.79042779  | 2.066429173  | 1.05E-15    | 2.90E-15    |
| MIR3153     | 0.059164126 | 0.30774623  | 2.378946601  | 3.24E-07    | 5.23E-07    |
| LINC01138   | 0.624317926 | 1.388918321 | 1.153608964  | 1.65E-20    | 6.33E-20    |
| KCNA3       | 0.197772511 | 0.532086814 | 1.427819735  | 8.36E-14    | 2.03E-13    |
| CACNB1      | 0.281033504 | 0.705075235 | 1.327035072  | 6.93E-18    | 2.19E-17    |
| CTBP1-AS    | 0.113337408 | 0.457503607 | 2.013159007  | 2.28E-23    | 1.08E-22    |
| AC073869.3  | 0.052973365 | 0.240861785 | 2.184866461  | 1.02E-16    | 3.00E-16    |
| AC008147.3  | 0.081314695 | 0.433241285 | 2.413582734  | 0.000590401 | 0.000770485 |
| PRR15L      | 21.49308224 | 4.877756824 | -2.139582648 | 7.34E-33    | 1.02E-31    |
| CD276       | 6.087684542 | 13.8735561  | 1.188372123  | 7.40E-33    | 1.02E-31    |
| GTSF1       | 0.089810436 | 0.238277443 | 1.407687388  | 8.11E-19    | 2.74E-18    |
| RAB7B       | 0.426023451 | 1.749203007 | 2.037692982  | 2.58E-33    | 3.88E-32    |
| AC025580.3  | 0.051429403 | 0.798072769 | 3.955854993  | 3.67E-32    | 4.46E-31    |
| PTPRE       | 1.181018826 | 3.802451735 | 1.686897973  | 2.11E-33    | 3.23E-32    |
| LINC00379   | 7.239985654 | 0.343279104 | -4.398532892 | 5.85E-41    | 1.45E-38    |
| AC053513.1  | 0.216829319 | 0.652253033 | 1.5888719    | 1.20E-12    | 2.72E-12    |
| HLA-P       | 0.020674745 | 0.229237775 | 3.470903328  | 3.83E-27    | 2.50E-26    |
| RASL11B     | 16.23551784 | 0.813254989 | -4.319301823 | 1.18E-40    | 2.42E-38    |
| CXCL11      | 0.435641105 | 5.137675006 | 3.55990364   | 1.24E-30    | 1.20E-29    |
| NLGN3       | 0.626640136 | 0.266193127 | -1.235163854 | 8.75E-24    | 4.29E-23    |
| ZNF337      | 0.439783172 | 1.10558381  | 1.329944088  | 4.56E-24    | 2.30E-23    |
| AL590666.1  | 0.102628046 | 0.255259568 | 1.314539994  | 2.03E-06    | 3.12E-06    |
| GOLGA6L9    | 0.129306125 | 0.329485848 | 1.34942589   | 2.23E-13    | 5.27E-13    |
| KDEL1       | 3.154761333 | 7.42597692  | 1.235049966  | 1.61E-28    | 1.21E-27    |
| EXOSC5      | 5.796388361 | 14.18738413 | 1.291382446  | 2.89E-35    | 6.73E-34    |
| DUSP10      | 1.257036978 | 3.303967931 | 1.394172594  | 3.88E-28    | 2.80E-27    |
| AC021146.12 | 0.643607603 | 0.184672742 | -1.801210432 | 2.27E-22    | 1.00E-21    |
| EPS8L1      | 4.630310065 | 1.510631278 | -1.615957242 | 6.65E-24    | 3.30E-23    |
| AL589745.1  | 0.527170553 | 1.399829763 | 1.408909698  | 2.68E-09    | 4.95E-09    |
| CCNI2       | 1.595631393 | 0.210784715 | -2.920285254 | 7.43E-39    | 5.86E-37    |
| FAM86GP     | 0.292229765 | 0.715025707 | 1.290891979  | 6.44E-15    | 1.68E-14    |
| POMGNT2     | 12.50049179 | 5.663017618 | -1.142341931 | 1.01E-35    | 2.67E-34    |
| AL137013.1  | 0.187494947 | 0.44461794  | 1.24571445   | 1.60E-15    | 4.33E-15    |
| AL158071.2  | 0.444675091 | 0.935840117 | 1.073510483  | 3.99E-06    | 6.01E-06    |
| MIR7111     | 0.133812167 | 0.815199782 | 2.606944369  | 3.38E-16    | 9.57E-16    |
| AXIN2       | 1.076281854 | 0.492308295 | -1.128421982 | 4.51E-23    | 2.10E-22    |
| PARVG       | 0.340106073 | 2.536222293 | 2.898624527  | 4.53E-38    | 2.72E-36    |
| AC010761.6  | 0.529955447 | 0.231180551 | -1.196851048 | 3.16E-18    | 1.02E-17    |
| AC004264.1  | 0.332652392 | 0.970038299 | 1.544026302  | 2.25E-09    | 4.18E-09    |
| SCGN        | 1.127248955 | 30.33762812 | 4.750230218  | 7.96E-20    | 2.90E-19    |
| AC245884.8  | 0.222197161 | 1.305749995 | 2.554966411  | 1.03E-21    | 4.32E-21    |
| PITRM1-AS1  | 0.087117755 | 0.360992507 | 2.050930216  | 2.19E-34    | 4.11E-33    |
| PRUNE2      | 6.921025583 | 17.81166695 | 1.363764799  | 6.01E-15    | 1.57E-14    |
| SLC47A2     | 7.855981212 | 0.541198923 | -3.859560607 | 2.40E-29    | 1.98E-28    |
| RPL11P3     | 0.186554939 | 0.555282818 | 1.573622203  | 2.14E-15    | 5.77E-15    |
| AC138207.5  | 0.884341435 | 4.936060112 | 2.480684572  | 6.34E-39    | 5.14E-37    |
| VMP1        | 13.10452178 | 32.49707459 | 1.310245145  | 9.60E-25    | 5.13E-24    |
| SIT1        | 0.534095041 | 3.558756068 | 2.736204653  | 9.12E-28    | 6.31E-27    |
| MEFV        | 0.116192453 | 0.458298683 | 1.979771777  | 1.86E-29    | 1.55E-28    |
| NUAK2       | 29.82674314 | 6.831295251 | -2.126375402 | 8.27E-33    | 1.14E-31    |



Table S1. The differentially expressed genes(DEGs) were screened out in TCGA

| ID         | conMean     | treatMean   | logFC        | pValue      | FDR         |
|------------|-------------|-------------|--------------|-------------|-------------|
| C6orf132   | 3.048809383 | 1.083022139 | -1.493183219 | 1.18E-15    | 3.24E-15    |
| MTCO2P12   | 21.64867976 | 9.295948898 | -1.219605002 | 9.11E-09    | 1.62E-08    |
| AC022509.2 | 0.845565649 | 6.118481481 | 2.855184968  | 4.78E-27    | 3.10E-26    |
| AL645924.2 | 0.044946693 | 0.289508133 | 2.687316993  | 8.87E-15    | 2.29E-14    |
| EIF4EP1    | 0.108532114 | 0.417804919 | 1.944707483  | 7.53E-14    | 1.83E-13    |
| ARL4C      | 8.339481043 | 24.57319224 | 1.559055772  | 2.40E-17    | 7.34E-17    |
| AC023818.1 | 0.112477131 | 0.38616023  | 1.779567891  | 4.71E-19    | 1.62E-18    |
| IL2RG      | 3.815911381 | 13.90997645 | 1.866020405  | 2.53E-23    | 1.20E-22    |
| AL391244.3 | 0.419782008 | 1.092350205 | 1.379723215  | 9.00E-22    | 3.79E-21    |
| LINC00987  | 0.77125789  | 1.550870182 | 1.00779268   | 3.34E-18    | 1.08E-17    |
| LINC02600  | 1.396893071 | 0.637764007 | -1.131127006 | 7.14E-19    | 2.42E-18    |
| AL139275.2 | 0.793856698 | 0.141351525 | -2.489591152 | 1.60E-36    | 5.37E-35    |
| NPIP5      | 0.066270527 | 0.511438065 | 2.948120246  | 3.01E-23    | 1.42E-22    |
| ZNF581     | 5.687644333 | 11.79290736 | 1.052016279  | 6.50E-31    | 6.52E-30    |
| RNA5SP151  | 0.087270578 | 0.289398741 | 1.729491379  | 5.71E-07    | 9.08E-07    |
| AC124947.2 | 0.478847612 | 0.192314059 | -1.316102372 | 2.60E-16    | 7.43E-16    |
| AL512656.1 | 0.088754352 | 0.217758277 | 1.294837795  | 1.20E-05    | 1.75E-05    |
| TRBV12-4   | 0.138878832 | 0.845183387 | 2.60543769   | 1.30E-18    | 4.34E-18    |
| MMP16      | 0.077422438 | 0.560872813 | 2.856850009  | 1.52E-27    | 1.03E-26    |
| AL359095.1 | 0.032485727 | 0.2842669   | 3.129368232  | 2.70E-06    | 4.12E-06    |
| SLAMF6     | 0.625194848 | 3.704744733 | 2.566996346  | 8.80E-29    | 6.82E-28    |
| AC010618.3 | 0.270740151 | 0.618489669 | 1.191840644  | 4.93E-13    | 1.14E-12    |
| IGKV1-39   | 0.174729916 | 1.194486311 | 2.773191775  | 0.010642987 | 0.012665037 |
| RN7SL145P  | 0.131045891 | 0.373845723 | 1.512370909  | 8.86E-09    | 1.58E-08    |
| AXL        | 8.205070653 | 24.92379701 | 1.60293621   | 4.57E-29    | 3.66E-28    |
| LENG8-AS1  | 1.052020947 | 3.302748556 | 1.650503708  | 3.37E-22    | 1.46E-21    |
| AL162274.2 | 0.752120361 | 1.582992774 | 1.073619212  | 1.05E-14    | 2.69E-14    |
| AL132989.1 | 0.684699374 | 1.931372104 | 1.496083548  | 3.45E-13    | 8.07E-13    |
| PPIEL      | 0.417853021 | 1.089029516 | 1.381975584  | 3.66E-13    | 8.54E-13    |
| AL109976.1 | 0.754934557 | 0.184213344 | -2.034974012 | 1.31E-13    | 3.15E-13    |
| AC007919.1 | 0.172674255 | 0.588945029 | 1.770079986  | 5.48E-05    | 7.66E-05    |
| GPR37      | 0.517171718 | 1.65630418  | 1.679252361  | 0.000381906 | 0.000504989 |
| BCL11B     | 0.334573893 | 1.048570882 | 1.648027608  | 6.76E-21    | 2.66E-20    |
| RPS2P7     | 0.26910057  | 0.70203299  | 1.383393382  | 1.02E-22    | 4.63E-22    |
| ITGB1-DT   | 0.074538423 | 0.298452208 | 2.001443732  | 3.27E-19    | 1.14E-18    |
| PLAC8      | 0.304165923 | 1.103140788 | 1.858686492  | 2.02E-22    | 8.92E-22    |
| AREL1      | 9.949713139 | 4.373315148 | -1.185927617 | 1.48E-37    | 7.38E-36    |
| CCM2       | 3.021729278 | 6.501671091 | 1.105436162  | 2.50E-37    | 1.15E-35    |
| THRB       | 6.16222875  | 1.629610372 | -1.91892517  | 6.43E-38    | 3.64E-36    |
| CD19       | 0.134982263 | 0.29865017  | 1.145686696  | 0.001834211 | 0.002312618 |
| AC023794.2 | 1.396663994 | 0.46428762  | -1.588894264 | 6.92E-28    | 4.85E-27    |
| CDH5       | 12.22966257 | 29.40506861 | 1.265680258  | 4.06E-19    | 1.40E-18    |
| ASGR1      | 0.176208928 | 0.524056897 | 1.572436434  | 1.07E-22    | 4.82E-22    |
| SH2D5      | 0.09833076  | 0.537879154 | 2.451567382  | 1.70E-26    | 1.05E-25    |
| AC067852.3 | 0.167249728 | 0.609204143 | 1.864921886  | 6.88E-18    | 2.18E-17    |
| LINC02384  | 0.864156558 | 4.964735538 | 2.522352258  | 7.27E-16    | 2.02E-15    |
| AP000347.2 | 0.106717594 | 0.265008959 | 1.312243091  | 1.80E-09    | 3.35E-09    |
| TPX2       | 0.917095694 | 4.347690937 | 2.245105203  | 8.60E-34    | 1.43E-32    |
| GK-IT1     | 0.043120873 | 0.257425832 | 2.577698555  | 3.06E-09    | 5.61E-09    |
| AL137244.1 | 0.103611778 | 0.22863303  | 1.141845825  | 9.17E-06    | 1.35E-05    |
| PLA1A      | 7.496634472 | 23.00606604 | 1.617699344  | 1.25E-24    | 6.63E-24    |
| SLITRK5    | 0.034597019 | 0.377350013 | 3.447183667  | 1.90E-12    | 4.24E-12    |
| RNU6-216P  | 0.092053288 | 0.39483602  | 2.100712458  | 2.61E-10    | 5.11E-10    |
| ATP2B1-AS1 | 1.031560103 | 0.475862957 | -1.116209821 | 8.78E-27    | 5.56E-26    |
| PTP4A2P2   | 0.265044656 | 2.190796107 | 3.047147867  | 1.83E-33    | 2.83E-32    |

Table S1. The differentially expressed genes(DEGs) were screened out in TCGA

| ID         | conMean     | treatMean   | logFC        | pValue      | FDR         |
|------------|-------------|-------------|--------------|-------------|-------------|
| TXLNB      | 0.101656461 | 0.372347149 | 1.872946406  | 1.17E-23    | 5.69E-23    |
| C1QL1      | 2.116853707 | 26.62247187 | 3.652651055  | 3.12E-18    | 1.01E-17    |
| KCTD1      | 6.309072724 | 1.589934088 | -1.988461022 | 1.39E-35    | 3.53E-34    |
| AL442125.1 | 0.102533363 | 0.242228472 | 1.24027504   | 2.92E-14    | 7.30E-14    |
| SUCLG2-AS1 | 1.044462781 | 0.356145849 | -1.552221002 | 4.52E-34    | 7.94E-33    |
| GUCA1B     | 0.246989361 | 0.557863668 | 1.175463698  | 5.26E-11    | 1.07E-10    |
| CHST11     | 2.084835428 | 7.156856489 | 1.779392546  | 1.13E-32    | 1.53E-31    |
| RNY3P16    | 0.206052521 | 1.402531039 | 2.76694868   | 2.79E-24    | 1.43E-23    |
| GRAMD1C    | 6.268162222 | 2.420786875 | -1.372566447 | 4.54E-33    | 6.58E-32    |
| PLPPR5     | 0.019206032 | 1.661342626 | 6.434646341  | 8.05E-25    | 4.32E-24    |
| DNAJC3-DT  | 3.549417015 | 1.396473157 | -1.345794242 | 1.95E-28    | 1.45E-27    |
| ADAMTSL2   | 9.837698514 | 4.030193252 | -1.287471824 | 3.65E-27    | 2.39E-26    |
| AC015813.1 | 0.572767729 | 1.860718595 | 1.699837771  | 2.02E-16    | 5.80E-16    |
| LINC01431  | 0.864626436 | 0.376580774 | -1.199117603 | 3.11E-23    | 1.46E-22    |
| RPL7L1P9   | 0.023536097 | 0.308625371 | 3.712909682  | 2.28E-19    | 8.02E-19    |
| PPM1N      | 0.189829642 | 0.412476436 | 1.119606421  | 2.63E-12    | 5.83E-12    |
| TRAF3IP3   | 0.35790943  | 1.356799832 | 1.922541437  | 1.83E-25    | 1.04E-24    |
| EIF4EBP3   | 6.625957875 | 16.00946801 | 1.272724432  | 1.46E-29    | 1.23E-28    |
| CXCL2      | 2.548180188 | 7.809354085 | 1.61573593   | 8.04E-08    | 1.35E-07    |
| CRACR2A    | 0.08711407  | 0.402706571 | 2.208751361  | 1.11E-33    | 1.79E-32    |
| MEIS3P2    | 0.849971935 | 0.390244623 | -1.123036451 | 6.31E-18    | 2.00E-17    |
| MEOX2      | 0.515356927 | 1.306766375 | 1.342357369  | 0.001389256 | 0.001768834 |
| PTGFR      | 2.835108582 | 0.926759906 | -1.613136453 | 6.90E-30    | 6.08E-29    |
| CD248      | 8.726147347 | 29.91070497 | 1.777245174  | 1.82E-23    | 8.77E-23    |
| GDF7       | 2.248676313 | 0.819640679 | -1.456012514 | 1.48E-32    | 1.95E-31    |
| LINC01322  | 0.201254498 | 0.553553287 | 1.459701177  | 3.48E-10    | 6.74E-10    |
| PALD1      | 2.068786331 | 8.220696736 | 1.990476025  | 4.77E-36    | 1.37E-34    |
| RNF149     | 8.161234681 | 20.52890357 | 1.330797243  | 3.45E-36    | 1.02E-34    |
| APOBEC3C   | 5.735219014 | 24.61184262 | 2.101432187  | 5.44E-32    | 6.44E-31    |
| ADGRL1     | 4.835866639 | 2.355932501 | -1.037476253 | 7.67E-23    | 3.50E-22    |
| ATG12      | 2.466337486 | 5.002604325 | 1.020309121  | 4.17E-36    | 1.21E-34    |
| PCDH7      | 1.27740015  | 0.486410964 | -1.392962873 | 6.50E-21    | 2.56E-20    |
| ALDH1A2    | 6.188338667 | 1.911341814 | -1.694966347 | 3.22E-32    | 3.95E-31    |
| GTF2IP20   | 0.852427918 | 2.208304935 | 1.373289652  | 3.14E-13    | 7.35E-13    |
| GRIK3      | 0.091674858 | 3.17478796  | 5.11399031   | 1.95E-37    | 9.26E-36    |
| RNU4-62P   | 0.346408164 | 2.113860407 | 2.609335271  | 9.51E-15    | 2.45E-14    |
| ISG15      | 13.7994606  | 40.46061088 | 1.551906227  | 8.66E-26    | 5.06E-25    |
| TBXAS1     | 1.432715124 | 5.04850144  | 1.817103435  | 8.93E-36    | 2.40E-34    |
| SHISA2     | 4.035382526 | 0.752719941 | -2.422520341 | 1.87E-35    | 4.57E-34    |
| CCR4       | 0.37777026  | 1.049633981 | 1.474305297  | 4.56E-13    | 1.06E-12    |
| AC083798.1 | 0.181335494 | 0.487192299 | 1.425829987  | 0.000612976 | 0.000799034 |
| HLA-K      | 1.95583844  | 5.756490098 | 1.557402223  | 1.12E-12    | 2.54E-12    |
| SYT12      | 0.1624993   | 0.616284338 | 1.923162625  | 1.85E-09    | 3.45E-09    |
| AL109741.2 | 0.069847908 | 0.268675661 | 1.943576814  | 1.70E-13    | 4.05E-13    |
| LPAR5      | 0.543109325 | 2.480662166 | 2.191410734  | 1.38E-32    | 1.83E-31    |
| SNORA54    | 0.151229023 | 12.473909   | 6.366034789  | 0.022391863 | 0.02599547  |
| SLC5A12    | 37.13157583 | 13.53986359 | -1.455433339 | 0.000411843 | 0.000543248 |
| RNU6-125P  | 0.10269131  | 0.352868366 | 1.780816004  | 3.28E-08    | 5.64E-08    |
| LRRN1      | 0.641438011 | 0.244892487 | -1.389161334 | 4.97E-34    | 8.63E-33    |
| AC068790.7 | 0.110991305 | 0.381369551 | 1.780742999  | 1.92E-15    | 5.18E-15    |
| LINC02356  | 0.114659569 | 0.233014964 | 1.023065846  | 7.21E-06    | 1.07E-05    |
| RNU6-45P   | 0.073800738 | 0.220939649 | 1.581945206  | 3.00E-06    | 4.56E-06    |
| IGLVI-70   | 0.060746185 | 0.581720875 | 3.259461374  | 0.0039776   | 0.004889005 |
| FSIP2-AS1  | 0.074798642 | 0.282715429 | 1.918266634  | 1.93E-14    | 4.87E-14    |
| MYH7B      | 0.16935475  | 0.400947274 | 1.243364077  | 3.02E-08    | 5.20E-08    |

Table S1. The differentially expressed genes(DEGs) were screened out in TCGA

| ID          | conMean     | treatMean   | logFC        | pValue      | FDR         |
|-------------|-------------|-------------|--------------|-------------|-------------|
| DOK7        | 1.273456439 | 0.235278725 | -2.436306835 | 1.60E-30    | 1.53E-29    |
| PIK3IP1-AS1 | 0.16646616  | 0.460649791 | 1.46844143   | 8.03E-12    | 1.72E-11    |
| AC008013.1  | 0.02449986  | 0.282473929 | 3.527272289  | 2.00E-24    | 1.04E-23    |
| RNU6-1206P  | 0.078823548 | 0.263090354 | 1.738859767  | 0.000106    | 0.000145519 |
| AC011462.4  | 0.384346072 | 1.666939175 | 2.116723632  | 2.50E-18    | 8.18E-18    |
| AC018738.1  | 11.31228107 | 23.67082709 | 1.065220245  | 1.39E-14    | 3.55E-14    |
| CYSTM1      | 108.2925346 | 52.29856764 | -1.050090451 | 1.04E-30    | 1.02E-29    |
| GMFG        | 6.790638792 | 24.41895476 | 1.846382248  | 2.94E-35    | 6.83E-34    |
| SLC25A5     | 313.8113806 | 143.5702395 | -1.128140948 | 3.48E-33    | 5.13E-32    |
| TRNP1       | 10.33964227 | 2.56999227  | -2.008350346 | 5.07E-31    | 5.15E-30    |
| GABPB1-AS1  | 0.45966771  | 1.176202694 | 1.355473471  | 2.55E-09    | 4.70E-09    |
| ARHGEF6     | 3.482305297 | 8.000884894 | 1.200116879  | 2.19E-28    | 1.63E-27    |
| VSIG8       | 1.052724628 | 0.156703924 | -2.748014891 | 6.15E-15    | 1.60E-14    |
| MIR7851     | 0.058426904 | 0.32337507  | 2.468503715  | 4.20E-07    | 6.74E-07    |
| ATRNL1      | 1.41614039  | 0.36887733  | -1.940751262 | 5.60E-31    | 5.66E-30    |
| SCOC        | 19.77360851 | 9.669348494 | -1.032085583 | 6.69E-35    | 1.43E-33    |
| RIPOR2      | 1.185723388 | 2.471663038 | 1.059714585  | 1.81E-15    | 4.90E-15    |
| AL139280.1  | 9.836985751 | 0.089441661 | -6.781125519 | 1.18E-42    | 5.90E-40    |
| AC044849.1  | 0.096537564 | 0.312691086 | 1.69557576   | 1.10E-16    | 3.23E-16    |
| SLC15A3     | 2.414404156 | 7.561034736 | 1.646916488  | 2.07E-32    | 2.65E-31    |
| AC007953.1  | 0.425381453 | 2.477238388 | 2.54190367   | 2.78E-15    | 7.41E-15    |
| EVA1C       | 2.4942814   | 5.489176606 | 1.13796552   | 1.15E-22    | 5.16E-22    |
| LINC02167   | 0.01304284  | 0.359030193 | 4.782775235  | 0.000887442 | 0.001145999 |
| BRCC3       | 9.277266306 | 4.483319082 | -1.049132574 | 1.23E-36    | 4.33E-35    |
| KIAA0319    | 0.051204146 | 0.378006195 | 2.884077335  | 1.99E-23    | 9.52E-23    |
| SH3PXD2B    | 1.633679643 | 4.718738435 | 1.530276098  | 3.75E-25    | 2.07E-24    |
| FREM1       | 4.800607591 | 0.465917184 | -3.365071566 | 1.35E-38    | 9.77E-37    |
| MIR553      | 0.187885165 | 0.608221677 | 1.694746074  | 0.000184605 | 0.000249469 |
| DUSP5P1     | 0.033008682 | 0.561697978 | 4.088877161  | 2.35E-34    | 4.35E-33    |
| NRBF2P5     | 0.066555866 | 0.300421489 | 2.174350283  | 1.72E-19    | 6.10E-19    |
| MARVELD1    | 6.114439847 | 13.19401756 | 1.109591687  | 5.36E-22    | 2.29E-21    |
| SKIDA1      | 0.627480321 | 0.279658307 | -1.165905026 | 4.37E-24    | 2.20E-23    |
| HS3ST3B1    | 2.009527624 | 0.841999608 | -1.254964943 | 1.52E-30    | 1.45E-29    |
| PABPC1P3    | 0.296712468 | 0.681397956 | 1.19943207   | 9.39E-19    | 3.16E-18    |
| TEX15       | 0.010777577 | 0.606018266 | 5.813256484  | 2.19E-13    | 5.18E-13    |
| SMIM25      | 0.257030096 | 1.518804929 | 2.562927387  | 6.13E-33    | 8.63E-32    |
| TRMT1       | 4.00538875  | 9.001299178 | 1.168190971  | 7.66E-38    | 4.22E-36    |
| MIR589      | 0.189078804 | 0.4399576   | 1.218376848  | 9.60E-09    | 1.71E-08    |
| HRAT92      | 0.244673787 | 0.531951025 | 1.120433884  | 1.10E-05    | 1.62E-05    |
| BRIP1       | 0.119980233 | 0.433330819 | 1.852672104  | 7.61E-32    | 8.78E-31    |
| CCBE1       | 1.732462516 | 0.489675237 | -1.822926992 | 7.61E-30    | 6.63E-29    |
| ALOX5       | 2.980667235 | 12.6033022  | 2.08009456   | 3.05E-25    | 1.69E-24    |
| IGHV4-39    | 10.18009334 | 58.14495383 | 2.513903202  | 0.000176906 | 0.000239455 |
| LINC02351   | 0.567380842 | 5.740939918 | 3.338897614  | 9.82E-08    | 1.64E-07    |
| SNORA33     | 1.123508455 | 3.743426416 | 1.736348415  | 2.50E-11    | 5.20E-11    |
| IGFLR1      | 0.362848168 | 1.149624678 | 1.663725047  | 4.00E-23    | 1.86E-22    |
| AL450998.2  | 0.095521077 | 0.332924604 | 1.801304484  | 8.38E-17    | 2.47E-16    |
| FTLP15      | 0.033773816 | 0.646487475 | 4.258645338  | 3.82E-22    | 1.66E-21    |
| HIST1H4I    | 1.982742971 | 4.298443565 | 1.116316696  | 1.30E-11    | 2.76E-11    |
| AC087683.2  | 0.179873357 | 0.367402406 | 1.030379563  | 0.002219625 | 0.002780846 |
| AC023024.2  | 0.391276198 | 3.680516616 | 3.233649027  | 9.74E-31    | 9.58E-30    |
| AC010998.2  | 0.070062366 | 0.221218608 | 1.658761126  | 3.84E-10    | 7.42E-10    |
| RN7SKP271   | 0.077143906 | 0.24679902  | 1.677712567  | 5.85E-06    | 8.72E-06    |
| IGLV3-12    | 0.107528232 | 0.512671375 | 2.253318853  | 3.58E-08    | 6.15E-08    |
| SYNE4       | 2.431315445 | 0.48135982  | -2.336549458 | 5.86E-35    | 1.26E-33    |

Table S1. The differentially expressed genes(DEGs) were screened out in TCGA

| ID         | conMean     | treatMean   | logFC        | pValue      | FDR         |
|------------|-------------|-------------|--------------|-------------|-------------|
| AL133410.1 | 0.245266753 | 0.527486407 | 1.104782231  | 1.29E-05    | 1.88E-05    |
| AC025171.4 | 0.167365533 | 0.980219953 | 2.550103063  | 2.23E-27    | 1.49E-26    |
| AC022182.2 | 0.10863025  | 0.259309966 | 1.255251753  | 9.00E-17    | 2.65E-16    |
| CAB39L     | 9.514609514 | 3.04389965  | -1.644223651 | 3.13E-35    | 7.19E-34    |
| RSPH9      | 0.443295907 | 1.000483355 | 1.174355218  | 5.34E-18    | 1.70E-17    |
| SLC5A1     | 2.409237749 | 11.15656198 | 2.211243839  | 1.46E-05    | 2.12E-05    |
| CR1        | 1.106808736 | 0.290158861 | -1.931491042 | 5.77E-10    | 1.10E-09    |
| ATP6V1G2   | 0.972420825 | 0.464731309 | -1.065183948 | 1.96E-25    | 1.11E-24    |
| AC110285.2 | 0.562439891 | 1.814949524 | 1.6901586    | 1.44E-05    | 2.09E-05    |
| RNU6-407P  | 0.073867338 | 0.456753948 | 2.628408716  | 1.50E-09    | 2.81E-09    |
| AL031705.1 | 0.052757477 | 0.221974166 | 2.072944304  | 3.04E-13    | 7.13E-13    |
| AF131215.7 | 0.582491901 | 0.177725418 | -1.71258796  | 5.42E-28    | 3.85E-27    |
| AC005785.2 | 0.184874462 | 0.757598718 | 2.03488794   | 1.06E-14    | 2.73E-14    |
| LTB        | 3.023133071 | 6.293113535 | 1.057729487  | 3.69E-08    | 6.34E-08    |
| OSMR       | 9.402279542 | 26.62434045 | 1.501663308  | 1.12E-25    | 6.47E-25    |
| BNIP3P16   | 0.084456721 | 0.238324091 | 1.49664066   | 0.00052375  | 0.000686245 |
| GSDMA      | 0.174058689 | 0.478996959 | 1.460442657  | 1.34E-09    | 2.52E-09    |
| SFXN5      | 3.497616972 | 1.479127488 | -1.241625901 | 7.38E-35    | 1.55E-33    |
| CAMKK1     | 0.824798469 | 2.284343874 | 1.469666282  | 2.84E-32    | 3.51E-31    |
| AL928654.2 | 0.738447469 | 2.173388958 | 1.557379186  | 1.36E-11    | 2.88E-11    |
| PLA2R1     | 10.68592537 | 1.316313958 | -3.021136309 | 1.84E-18    | 6.05E-18    |
| CD79A      | 1.308517064 | 4.445079049 | 1.764276337  | 1.02E-09    | 1.92E-09    |
| LINC02577  | 0.007771186 | 0.485712515 | 5.965824067  | 1.09E-16    | 3.19E-16    |
| BTBD11     | 2.219668311 | 0.779528753 | -1.509669965 | 5.20E-25    | 2.84E-24    |
| REV3L-IT1  | 0.07923046  | 0.229012348 | 1.531298307  | 0.024309171 | 0.028140556 |
| ZNF320     | 3.640963903 | 8.058748898 | 1.146235443  | 2.41E-19    | 8.47E-19    |
| SLC9A4     | 12.84169881 | 0.161819483 | -6.310306935 | 1.39E-42    | 6.65E-40    |
| ZFAS1      | 14.12676968 | 45.20327922 | 1.677995828  | 5.87E-38    | 3.39E-36    |
| NRIR       | 0.057481411 | 0.321269818 | 2.48261807   | 1.20E-20    | 4.66E-20    |
| AC017048.3 | 0.341540392 | 1.200181064 | 1.813123959  | 3.32E-15    | 8.82E-15    |
| KLHL3      | 2.635180489 | 0.834973952 | -1.658098681 | 6.96E-30    | 6.12E-29    |
| AC068858.1 | 0.004890102 | 0.336092614 | 6.102850342  | 1.17E-32    | 1.58E-31    |
| AC020594.1 | 0.211982826 | 0.613809802 | 1.533844297  | 2.93E-12    | 6.47E-12    |
| TFPI       | 9.58249375  | 20.08668751 | 1.067766612  | 8.01E-15    | 2.07E-14    |
| DBT        | 8.216476389 | 2.868898877 | -1.518022714 | 1.14E-40    | 2.39E-38    |
| INKA1      | 1.97034924  | 4.941061567 | 1.326369665  | 2.06E-20    | 7.81E-20    |
| FKBP9P1    | 0.406839473 | 1.969950795 | 2.275628029  | 9.61E-06    | 1.41E-05    |
| AC078993.1 | 0.075040845 | 0.306914151 | 2.032087194  | 1.28E-07    | 2.12E-07    |
| NR1I3      | 1.192470162 | 0.217708335 | -2.453484618 | 2.63E-32    | 3.30E-31    |
| EME2       | 0.541334508 | 2.03330192  | 1.90923219   | 2.23E-19    | 7.86E-19    |
| SNHG12     | 0.598911894 | 4.772296704 | 2.994268052  | 2.39E-37    | 1.10E-35    |
| PCDHB16    | 1.583781643 | 3.232568051 | 1.029307298  | 2.87E-05    | 4.09E-05    |
| ATP5MC1P3  | 0.057498489 | 0.230933085 | 2.005878923  | 1.06E-07    | 1.76E-07    |
| SLC6A8     | 25.86596617 | 81.88765431 | 1.662590881  | 2.95E-24    | 1.51E-23    |
| AP000347.1 | 0.134307988 | 0.346059731 | 1.365475961  | 1.12E-09    | 2.10E-09    |
| CNNM2      | 2.685589222 | 1.339853339 | -1.003163561 | 6.02E-27    | 3.87E-26    |
| NEAT1      | 11.05923219 | 34.95294304 | 1.660162708  | 2.89E-09    | 5.31E-09    |
| AC124854.1 | 1.089440548 | 5.830667031 | 2.420073469  | 5.35E-12    | 1.16E-11    |
| AL139123.1 | 0.082770263 | 0.360858653 | 2.124249398  | 1.48E-14    | 3.77E-14    |
| CA4        | 10.62316754 | 4.044865668 | -1.393050306 | 1.46E-20    | 5.62E-20    |
| RPL36AP26  | 0.056592634 | 0.226051329 | 1.9979642    | 1.15E-08    | 2.03E-08    |
| SNORA77    | 0.117443957 | 0.703215212 | 2.581993792  | 4.51E-19    | 1.55E-18    |
| AC011352.1 | 0.04359626  | 1.920661092 | 5.461254773  | 4.77E-31    | 4.87E-30    |
| CYTIP      | 2.064335346 | 4.931662954 | 1.256396853  | 2.22E-16    | 6.37E-16    |
| NT5DC3     | 1.112540356 | 5.33735589  | 2.262267544  | 4.59E-31    | 4.70E-30    |

Table S1. The differentially expressed genes(DEGs) were screened out in TCGA

| ID         | conMean     | treatMean   | logFC        | pValue      | FDR         |
|------------|-------------|-------------|--------------|-------------|-------------|
| LINC01018  | 1.2876631   | 0.257171604 | -2.323951921 | 1.66E-32    | 2.18E-31    |
| ZEB2-AS1   | 0.19662036  | 0.484196453 | 1.30017979   | 3.30E-18    | 1.07E-17    |
| LRG1       | 2.489034007 | 5.43212172  | 1.125929866  | 0.000357884 | 0.000474077 |
| RNU6-1223P | 0.105880317 | 0.546848944 | 2.368707949  | 9.59E-12    | 2.05E-11    |
| DACH1      | 6.507152597 | 1.307835817 | -2.314844947 | 2.23E-35    | 5.34E-34    |
| CD200      | 4.497830722 | 14.55637593 | 1.694349945  | 1.41E-30    | 1.36E-29    |
| DGCR9      | 0.208328068 | 3.437848526 | 4.04457685   | 1.50E-37    | 7.43E-36    |
| LMO7       | 10.97207676 | 4.721159131 | -1.216623605 | 9.04E-31    | 8.90E-30    |
| AC069209.1 | 0.055201966 | 0.479997948 | 3.120236695  | 5.11E-37    | 2.08E-35    |
| AC007387.1 | 0.199805525 | 0.709832488 | 1.828882132  | 1.96E-22    | 8.65E-22    |
| AC116345.1 | 0.347109887 | 1.978532634 | 2.510966497  | 5.36E-07    | 8.54E-07    |
| RHOBTB3    | 14.44933147 | 4.872251806 | -1.568342144 | 5.55E-31    | 5.62E-30    |
| SLC7A7     | 32.90210566 | 15.28204536 | -1.106342268 | 0.016778568 | 0.019640502 |
| AKR1C2     | 3.012281661 | 1.251670804 | -1.267001499 | 0.000733587 | 0.000951435 |
| HUNK       | 4.698769292 | 1.440625397 | -1.705587691 | 5.34E-32    | 6.34E-31    |
| DOCK10     | 1.270712457 | 3.489792394 | 1.457503607  | 1.57E-26    | 9.76E-26    |
| EFHD2      | 10.82617878 | 29.13925687 | 1.428439968  | 7.06E-35    | 1.49E-33    |
| AC046143.1 | 0.399306842 | 0.881937974 | 1.143179403  | 5.04E-22    | 2.16E-21    |
| BHMT       | 162.9281698 | 71.68400267 | -1.184512962 | 0.006948433 | 0.00839373  |
| IGLV2-11   | 10.21579816 | 39.00749926 | 1.932949584  | 2.11E-06    | 3.24E-06    |
| RPL37P6    | 0.39315398  | 1.227342303 | 1.642371303  | 3.21E-16    | 9.11E-16    |
| LINC01843  | 0.734497359 | 2.935287205 | 1.998672463  | 5.23E-23    | 2.42E-22    |
| AC008771.1 | 3.743810764 | 1.154918865 | -1.69671601  | 2.86E-38    | 1.85E-36    |
| KCNN1      | 0.048862429 | 0.965840504 | 4.304987469  | 1.80E-28    | 1.35E-27    |
| PLAUR      | 1.890214832 | 5.432327378 | 1.523020213  | 2.41E-21    | 9.86E-21    |
| TST        | 39.88242282 | 18.93979191 | -1.074332575 | 1.85E-16    | 5.33E-16    |
| EFNA3      | 0.495254386 | 2.558876447 | 2.369268832  | 3.67E-34    | 6.58E-33    |
| AP003721.4 | 0.732516388 | 0.358155059 | -1.032276715 | 1.18E-22    | 5.30E-22    |
| UCHL1      | 34.07244613 | 8.608046433 | -1.98484776  | 4.98E-31    | 5.07E-30    |
| ATP6V1A    | 73.65001917 | 32.1654159  | -1.195175558 | 3.77E-35    | 8.46E-34    |
| Z93241.1   | 0.051342081 | 0.281070073 | 2.452716186  | 2.29E-11    | 4.79E-11    |
| AC006272.2 | 0.156066015 | 0.563393263 | 1.851985905  | 1.72E-17    | 5.32E-17    |
| ALDH6A1    | 74.57451519 | 9.606474867 | -2.956603663 | 7.95E-34    | 1.33E-32    |
| AL024508.1 | 0.128651828 | 0.289249157 | 1.168840803  | 4.34E-06    | 6.53E-06    |
| AC007878.1 | 0.124091059 | 0.587720868 | 2.243731957  | 6.22E-15    | 1.62E-14    |
| MIR1249    | 0.134043078 | 0.735103214 | 2.455250105  | 1.61E-18    | 5.33E-18    |
| AC156455.1 | 0.231366171 | 1.954357258 | 3.078444376  | 1.22E-32    | 1.64E-31    |
| TNFSF11    | 0.055632971 | 0.250587558 | 2.171302735  | 5.90E-05    | 8.23E-05    |
| AGR3       | 1.37164739  | 0.33103386  | -2.050858957 | 3.20E-29    | 2.61E-28    |
| AC008735.1 | 0.061577444 | 0.371671466 | 2.593554034  | 1.34E-18    | 4.46E-18    |
| PLEKHN1    | 0.216677001 | 1.178643091 | 2.443508983  | 4.40E-31    | 4.51E-30    |
| TP73       | 0.029289927 | 0.245782348 | 3.06890478   | 7.64E-35    | 1.60E-33    |
| C7orf61    | 0.071046797 | 0.265264539 | 1.90059032   | 2.11E-21    | 8.64E-21    |
| HSD17B7P2  | 0.575905651 | 1.397143087 | 1.278575396  | 3.83E-13    | 8.95E-13    |
| FGD2       | 0.269128156 | 1.603339915 | 2.57471508   | 1.81E-34    | 3.45E-33    |
| AC008105.3 | 0.051765831 | 0.825717928 | 3.995576987  | 4.20E-33    | 6.12E-32    |
| AL928921.1 | 0.665300456 | 0.229312225 | -1.536692752 | 1.13E-36    | 4.05E-35    |
| PAFAH2     | 13.64466783 | 6.629820497 | -1.041295559 | 2.89E-39    | 2.80E-37    |
| ASPHD1     | 0.907101764 | 5.709440909 | 2.654013164  | 2.66E-30    | 2.46E-29    |
| SCARNA21   | 0.281411142 | 5.568094176 | 4.306432259  | 0.000125481 | 0.000171586 |
| WDFY3-AS2  | 5.034594472 | 2.270668448 | -1.14875851  | 1.95E-28    | 1.45E-27    |
| GAPDHP63   | 0.15671585  | 0.459136792 | 1.550772946  | 6.94E-25    | 3.75E-24    |
| RNU6-548P  | 0.050078837 | 0.266062457 | 2.409491987  | 9.30E-07    | 1.46E-06    |
| RN7SKP74   | 0.110412243 | 0.313906981 | 1.507436954  | 3.36E-05    | 4.77E-05    |
| ATP8B3     | 0.162560979 | 1.714730632 | 3.39892906   | 9.01E-37    | 3.38E-35    |

Table S1. The differentially expressed genes(DEGs) were screened out in TCGA

| ID         | conMean     | treatMean   | logFC        | pValue      | FDR         |
|------------|-------------|-------------|--------------|-------------|-------------|
| ASS1       | 292.4275089 | 46.38766543 | -2.656265887 | 2.32E-15    | 6.22E-15    |
| AC244035.1 | 0.071883294 | 0.658871218 | 3.196268071  | 6.72E-26    | 3.96E-25    |
| SSC4D      | 3.103315003 | 0.626701394 | -2.307960039 | 3.63E-38    | 2.27E-36    |
| AC092902.2 | 0.149906984 | 0.378056975 | 1.334536072  | 8.01E-15    | 2.07E-14    |
| CXCL9      | 2.611677277 | 32.86933179 | 3.653693587  | 4.37E-32    | 5.23E-31    |
| AC007098.1 | 0.106151122 | 0.572507396 | 2.431174709  | 2.41E-28    | 1.78E-27    |
| HIST1H2BC  | 2.682778747 | 5.801798546 | 1.112772124  | 3.83E-06    | 5.78E-06    |
| ITM2BP1    | 0.035137487 | 0.255483193 | 2.862145483  | 2.41E-16    | 6.91E-16    |
| FXYD1      | 0.634122951 | 2.165892981 | 1.77212746   | 0.020860929 | 0.024271543 |
| ARG1       | 0.056402044 | 0.281505714 | 2.319344853  | 1.47E-12    | 3.31E-12    |
| MIR514B    | 0.390470938 | 1.31106583  | 1.747453048  | 8.17E-11    | 1.65E-10    |
| CCDC74B    | 0.535560888 | 1.273610003 | 1.249801064  | 3.86E-10    | 7.45E-10    |
| LIMS1-AS1  | 0.113409345 | 0.549407112 | 2.276336056  | 4.25E-16    | 1.20E-15    |
| LINC02303  | 2.518065288 | 0.642811841 | -1.96984728  | 1.08E-36    | 3.89E-35    |
| HMCN1      | 0.851387547 | 2.06073792  | 1.275273144  | 1.06E-15    | 2.91E-15    |
| NHLRC4     | 6.565288281 | 0.657599657 | -3.31957691  | 8.36E-40    | 1.08E-37    |
| MIR6859-1  | 0.086435225 | 0.523918746 | 2.599651803  | 6.30E-11    | 1.28E-10    |
| RCN3       | 4.469268711 | 12.36701907 | 1.468387104  | 5.89E-19    | 2.01E-18    |
| IL12RB1    | 0.281273986 | 1.74229676  | 2.63094234   | 1.39E-36    | 4.81E-35    |
| B3GALT2    | 0.695039127 | 0.243777024 | -1.51153204  | 2.57E-27    | 1.71E-26    |
| AC092535.4 | 0.684499673 | 4.749027837 | 2.794510456  | 1.10E-23    | 5.38E-23    |
| CARD14     | 0.069239688 | 0.427836773 | 2.627389363  | 6.29E-20    | 2.31E-19    |
| SLC5A3     | 38.45969168 | 10.00933542 | -1.942001008 | 8.73E-26    | 5.09E-25    |
| AC138028.4 | 0.342256766 | 1.258070924 | 1.878062287  | 2.75E-17    | 8.37E-17    |
| RNF207     | 0.845602467 | 1.913290193 | 1.178004216  | 3.19E-08    | 5.50E-08    |
| COL18A1-AS | 0.808831245 | 0.213232132 | -1.923413873 | 3.71E-30    | 3.38E-29    |
| AC015977.1 | 0.034084068 | 0.943823735 | 4.791348034  | 4.80E-30    | 4.31E-29    |
| GAPT       | 0.476238973 | 2.054795962 | 2.109237551  | 1.11E-26    | 7.00E-26    |
| OR2A4      | 0.011538265 | 1.428506527 | 6.951937514  | 3.52E-35    | 8.01E-34    |
| BDNF       | 0.143576146 | 0.633485553 | 2.141495643  | 5.45E-13    | 1.26E-12    |
| KCNE4      | 2.292917635 | 9.532058827 | 2.055603323  | 2.47E-28    | 1.82E-27    |
| LINC00685  | 0.452585078 | 1.358990851 | 1.586274821  | 2.52E-13    | 5.94E-13    |
| AL031058.1 | 1.43643786  | 0.615755112 | -1.222066979 | 8.68E-28    | 6.01E-27    |
| IL10RB     | 9.550411444 | 19.31456255 | 1.01605421   | 2.80E-34    | 5.10E-33    |
| AC018553.1 | 0.626430707 | 3.968911411 | 2.663516523  | 1.57E-32    | 2.06E-31    |
| AC008115.3 | 0.325154265 | 1.159394281 | 1.834175022  | 5.75E-24    | 2.88E-23    |
| LDHC       | 0.570020052 | 0.208934469 | -1.447962146 | 1.40E-13    | 3.35E-13    |
| KLRG2      | 5.777790892 | 0.161630276 | -5.159748619 | 6.74E-40    | 9.01E-38    |
| AL513190.1 | 0.110530533 | 0.331572858 | 1.584880959  | 5.47E-14    | 1.34E-13    |
| GTF2IP13   | 0.624502972 | 1.5948146   | 1.352608376  | 1.79E-16    | 5.18E-16    |
| HSPB8      | 19.22729801 | 86.76589821 | 2.173972091  | 4.14E-34    | 7.36E-33    |
| PHEX       | 0.158928018 | 0.389262882 | 1.292371299  | 2.98E-08    | 5.14E-08    |
| AL513329.1 | 0.058947871 | 0.24972618  | 2.082835473  | 1.45E-15    | 3.94E-15    |
| MELK       | 0.259265315 | 1.328792969 | 2.357615229  | 1.74E-34    | 3.34E-33    |
| CHI3L2     | 0.442306416 | 2.096467856 | 2.244842634  | 8.60E-16    | 2.37E-15    |
| AC084824.3 | 0.189594878 | 0.532344545 | 1.4894403    | 3.43E-18    | 1.11E-17    |
| AP000553.2 | 0.095149677 | 0.420388802 | 2.143453576  | 2.72E-10    | 5.31E-10    |
| IGKV3D-11  | 0.44319516  | 1.917625878 | 2.113307251  | 7.49E-05    | 0.000103913 |
| APLN       | 7.656364378 | 20.39366017 | 1.413389331  | 1.84E-12    | 4.12E-12    |
| TMCC2      | 1.490492729 | 0.710378529 | -1.069129456 | 9.39E-19    | 3.16E-18    |
| AL117381.1 | 0.074774261 | 0.503164811 | 2.750417376  | 2.70E-14    | 6.77E-14    |
| AC008759.3 | 0.320423252 | 0.797216234 | 1.314992246  | 1.29E-11    | 2.73E-11    |
| AL138826.1 | 12.45973602 | 4.761008831 | -1.387934293 | 1.99E-06    | 3.06E-06    |
| CYP21A1P   | 0.265406118 | 1.358733308 | 2.355988781  | 2.23E-20    | 8.43E-20    |
| MIR3939    | 0.170483807 | 0.517949658 | 1.603177171  | 1.36E-05    | 1.98E-05    |

Table S1. The differentially expressed genes(DEGs) were screened out in TCGA

| ID         | conMean     | treatMean   | logFC        | pValue      | FDR         |
|------------|-------------|-------------|--------------|-------------|-------------|
| KIAA1324   | 0.127750022 | 0.454819651 | 1.831971046  | 3.03E-17    | 9.21E-17    |
| CD300C     | 0.445935792 | 2.184710382 | 2.292534136  | 1.01E-31    | 1.14E-30    |
| Z98751.2   | 0.054203376 | 1.249112384 | 4.526376771  | 9.78E-28    | 6.74E-27    |
| AC147067.2 | 0.238913819 | 1.252577816 | 2.390338023  | 4.78E-19    | 1.64E-18    |
| HIST2H2BC  | 0.604960483 | 1.839094015 | 1.60408242   | 9.70E-27    | 6.13E-26    |
| FCGR2B     | 0.396042087 | 1.586283661 | 2.001925122  | 8.50E-24    | 4.18E-23    |
| PNCK       | 0.692857538 | 24.79488998 | 5.16134027   | 1.34E-37    | 6.75E-36    |
| AC073115.1 | 0.0405357   | 2.249831888 | 5.794480338  | 3.97E-32    | 4.81E-31    |
| AC008537.3 | 0.248763385 | 0.501302878 | 1.010908362  | 5.52E-11    | 1.12E-10    |
| CLEC9A     | 0.242871092 | 0.68352274  | 1.492798556  | 8.56E-13    | 1.95E-12    |
| SHROOM3    | 7.386548546 | 1.997940346 | -1.886386897 | 3.57E-35    | 8.11E-34    |
| RN7SL608P  | 0.362101949 | 1.33118521  | 1.878243463  | 1.63E-16    | 4.72E-16    |
| RNU6-90P   | 0.062784584 | 0.347213339 | 2.467340091  | 5.96E-11    | 1.21E-10    |
| CCND1      | 36.32078097 | 183.1363816 | 2.334051294  | 5.57E-34    | 9.60E-33    |
| CTD-2297D1 | 0.956468354 | 0.243550613 | -1.97349562  | 1.16E-27    | 7.98E-27    |
| RAB15      | 5.731899764 | 2.799890486 | -1.033642982 | 9.92E-29    | 7.63E-28    |
| CATSPER2   | 0.194370723 | 0.448502123 | 1.206303888  | 3.73E-09    | 6.80E-09    |
| IGHV1-24   | 5.155594012 | 33.68942038 | 2.708085042  | 0.0007009   | 0.000910246 |
| ZNF189     | 8.239923389 | 16.84151373 | 1.031318986  | 3.31E-11    | 6.83E-11    |
| MSC-AS1    | 1.220437258 | 3.699326263 | 1.599864417  | 5.20E-25    | 2.84E-24    |
| BBC3       | 1.081136615 | 3.449776983 | 1.673954262  | 1.24E-34    | 2.47E-33    |
| AC073052.1 | 0.086026184 | 0.230901671 | 1.424430859  | 1.23E-06    | 1.91E-06    |
| AC026992.2 | 1.618297154 | 0.567803464 | -1.511012986 | 8.47E-26    | 4.95E-25    |
| PITPNC1    | 3.452344069 | 6.959672922 | 1.011443252  | 1.27E-22    | 5.71E-22    |
| CCSER1     | 1.167511879 | 0.218842165 | -2.41547459  | 2.54E-39    | 2.57E-37    |
| AC133919.2 | 0.076362801 | 0.228109528 | 1.578784793  | 0.00568634  | 0.00690966  |
| AL138847.2 | 1.412018289 | 0.397092841 | -1.830210517 | 8.66E-26    | 5.06E-25    |
| MALL       | 0.49131175  | 1.589124379 | 1.6935214    | 1.39E-20    | 5.34E-20    |
| MIRLET7BH  | 0.171123053 | 0.448607394 | 1.390419277  | 3.96E-10    | 7.65E-10    |
| AL157838.1 | 0.225540769 | 0.557560922 | 1.305741211  | 2.69E-11    | 5.58E-11    |
| C4B        | 3.488472213 | 11.63988239 | 1.738409234  | 1.01E-19    | 3.67E-19    |
| AGER       | 0.735303564 | 3.212644635 | 2.127349524  | 5.81E-26    | 3.44E-25    |
| PCDHGB2    | 0.412111081 | 1.312982891 | 1.671742958  | 0.003480266 | 0.004299533 |
| AL354733.3 | 0.578836821 | 1.504160766 | 1.377730168  | 1.09E-12    | 2.46E-12    |
| AC066613.1 | 0.195761845 | 0.597887761 | 1.610775071  | 3.26E-17    | 9.87E-17    |
| AC011472.2 | 0.118748808 | 0.401684633 | 1.758150244  | 6.77E-24    | 3.35E-23    |
| SLFN13     | 1.118439989 | 5.096339485 | 2.187973535  | 1.02E-36    | 3.71E-35    |
| CXCL12     | 37.1814979  | 16.05792324 | -1.21129957  | 6.88E-22    | 2.92E-21    |
| TMEM140    | 19.64592444 | 52.5895233  | 1.420545364  | 5.76E-35    | 1.24E-33    |
| MCM5       | 3.383897639 | 7.062441181 | 1.061481019  | 7.06E-32    | 8.21E-31    |
| KCNJ1      | 103.415914  | 1.338793899 | -6.271380518 | 4.86E-41    | 1.27E-38    |
| DIRAS2     | 0.909225106 | 7.364273278 | 3.017833739  | 7.44E-29    | 5.81E-28    |
| RNU7-45P   | 0.457226825 | 2.16802047  | 2.245396426  | 1.05E-11    | 2.25E-11    |
| ATP2A1     | 0.081020136 | 0.436369754 | 2.429198701  | 5.20E-21    | 2.06E-20    |
| HOXB5      | 7.3413065   | 1.866719336 | -1.975531803 | 1.75E-32    | 2.27E-31    |
| RN7SL473P  | 0.070248248 | 0.39675855  | 2.497727161  | 5.06E-09    | 9.16E-09    |
| CCR10      | 0.194860055 | 0.623353335 | 1.677611777  | 1.94E-22    | 8.57E-22    |
| AC010973.1 | 0.092602892 | 0.22571864  | 1.28539641   | 2.14E-06    | 3.28E-06    |
| RN7SL277P  | 0.012010486 | 0.289828269 | 4.592831938  | 4.23E-08    | 7.22E-08    |
| SCARNA13   | 0.393948544 | 11.2979006  | 4.841903701  | 7.21E-09    | 1.29E-08    |
| FOLR3      | 3.915703364 | 0.365672528 | -3.420647327 | 2.43E-37    | 1.12E-35    |
| AC016355.1 | 1.293010511 | 0.589404338 | -1.133404419 | 1.21E-22    | 5.44E-22    |
| FCN1       | 1.199971981 | 2.567401155 | 1.097308015  | 1.68E-11    | 3.53E-11    |
| AC006441.4 | 1.586704021 | 0.082427006 | -4.26677214  | 1.17E-14    | 2.99E-14    |
| ZDHHC8P1   | 0.836111299 | 0.409034214 | -1.031473477 | 4.23E-12    | 9.24E-12    |

Table S1. The differentially expressed genes(DEGs) were screened out in TCGA

| ID         | conMean     | treatMean   | logFC        | pValue      | FDR         |
|------------|-------------|-------------|--------------|-------------|-------------|
| SMPD5      | 0.083065513 | 0.236910553 | 1.512020932  | 2.63E-22    | 1.15E-21    |
| TEN1-CDK3  | 0.108263607 | 0.451365744 | 2.059748567  | 7.41E-24    | 3.66E-23    |
| SCNN1A     | 70.01062319 | 8.597278019 | -3.025621983 | 1.81E-37    | 8.73E-36    |
| OR2AT1P    | 0.004534392 | 0.251415915 | 5.793023197  | 1.04E-08    | 1.84E-08    |
| LRRC75B    | 4.068962664 | 11.58559773 | 1.509599531  | 1.71E-22    | 7.59E-22    |
| SLC22A7    | 11.08029853 | 1.266998231 | -3.128510336 | 1.26E-15    | 3.45E-15    |
| LINC00944  | 0.07658033  | 1.148177627 | 3.906228156  | 2.46E-32    | 3.12E-31    |
| RNU6-796P  | 0.206706668 | 3.148393893 | 3.928959213  | 2.83E-31    | 2.99E-30    |
| AC132812.1 | 1.430879772 | 5.73534493  | 2.002977797  | 1.44E-22    | 6.41E-22    |
| MOXD1      | 14.11447025 | 2.802109149 | -2.332589924 | 4.43E-28    | 3.18E-27    |
| TRBJ2-3    | 0.189229992 | 1.843410977 | 3.284165078  | 8.53E-25    | 4.57E-24    |
| EPB41L5    | 11.42652749 | 3.443815509 | -1.730307274 | 6.42E-41    | 1.54E-38    |
| AP000907.2 | 0.099392701 | 0.406925167 | 2.033551696  | 2.52E-13    | 5.94E-13    |
| TMEM44     | 1.504340865 | 5.175391077 | 1.782536382  | 6.83E-31    | 6.83E-30    |
| LINC02036  | 0.082439276 | 0.476345565 | 2.530604813  | 1.06E-21    | 4.41E-21    |
| GFAP       | 0.145218033 | 0.371593389 | 1.355504216  | 0.035658299 | 0.040710534 |
| AC060766.4 | 1.104377467 | 2.472203598 | 1.162564204  | 9.15E-23    | 4.15E-22    |
| AC068282.1 | 0.367757645 | 0.837085792 | 1.186620156  | 2.38E-10    | 4.67E-10    |
| LINC00882  | 0.706365326 | 0.269856108 | -1.388224181 | 2.74E-13    | 6.44E-13    |
| IGKV1D-17  | 0.20194485  | 0.553245967 | 1.453959673  | 0.001886806 | 0.002375875 |
| SYP        | 1.469080383 | 0.496358527 | -1.565458855 | 3.84E-37    | 1.64E-35    |
| INSL3      | 0.166406688 | 0.447177734 | 1.426134936  | 5.98E-11    | 1.21E-10    |
| POU5F1P3   | 0.05484929  | 0.344005176 | 2.648885415  | 2.28E-26    | 1.40E-25    |
| HSPA7      | 0.288952251 | 4.601849173 | 3.993310684  | 6.18E-35    | 1.33E-33    |
| RPL23AP32  | 0.140070192 | 0.669752515 | 2.257478118  | 4.44E-09    | 8.05E-09    |
| ANKRD36    | 0.146064745 | 0.519656781 | 1.830951077  | 1.11E-19    | 4.01E-19    |
| AL096701.3 | 0.087898713 | 0.305176833 | 1.795731505  | 2.57E-16    | 7.35E-16    |
| MIR7856    | 0.324548774 | 0.777467354 | 1.260346792  | 0.000302773 | 0.000403306 |
| HIST1H2BH  | 0.137485524 | 0.841267551 | 2.613284973  | 6.63E-13    | 1.52E-12    |
| C1R        | 27.82714464 | 57.15088376 | 1.038282928  | 1.52E-05    | 2.21E-05    |
| RPL10P9    | 4.381459824 | 15.3122633  | 1.805204007  | 1.24E-12    | 2.79E-12    |
| OAS1       | 4.888371375 | 13.44938515 | 1.460114423  | 8.67E-30    | 7.50E-29    |
| AC040160.1 | 0.11782695  | 0.513147147 | 2.122703027  | 1.99E-33    | 3.06E-32    |
| AC011290.2 | 0.191914794 | 0.68217528  | 1.829676549  | 1.51E-18    | 5.01E-18    |
| UNC93A     | 0.87529782  | 0.387584995 | -1.175261257 | 1.75E-14    | 4.43E-14    |
| AP001628.1 | 0.081387428 | 0.347057296 | 2.092295996  | 1.03E-11    | 2.19E-11    |
| AL358216.1 | 0.096081257 | 0.499237269 | 2.377398713  | 3.58E-08    | 6.14E-08    |
| GLDN       | 0.203987774 | 0.7916184   | 1.95632246   | 0.03100904  | 0.035554361 |
| SIGLEC12   | 0.06434534  | 0.395776131 | 2.620777027  | 1.16E-17    | 3.62E-17    |
| CCDC113    | 1.725929068 | 0.736996347 | -1.2276438   | 6.46E-22    | 2.75E-21    |
| RASL12     | 2.92217495  | 6.975140349 | 1.255179692  | 1.98E-20    | 7.53E-20    |
| TRIB3      | 2.151184735 | 18.04057482 | 3.06804198   | 9.85E-36    | 2.61E-34    |
| BMP1       | 2.151834175 | 7.837272629 | 1.864784779  | 2.28E-33    | 3.48E-32    |
| AC012435.2 | 0.125944949 | 0.272725323 | 1.114655396  | 1.14E-08    | 2.02E-08    |
| IGKV3D-20  | 1.856870892 | 6.156037195 | 1.72912844   | 0.000420348 | 0.000554184 |
| AC025884.1 | 0.148498748 | 0.501695188 | 1.756360331  | 1.03E-12    | 2.35E-12    |
| AC004832.4 | 0.091147509 | 0.419442037 | 2.202196315  | 2.73E-19    | 9.57E-19    |
| CLASRP     | 2.541471667 | 5.93973332  | 1.224734012  | 5.51E-24    | 2.76E-23    |
| TRBJ2-4    | 0.030405794 | 0.38169232  | 3.649991968  | 8.92E-13    | 2.03E-12    |
| GAL3ST4    | 0.732551153 | 5.532738686 | 2.916992377  | 1.95E-38    | 1.32E-36    |
| IGHV3OR16- | 0.103796313 | 0.492636136 | 2.246767254  | 9.77E-05    | 0.000134353 |
| TLL1       | 0.834454313 | 2.536952502 | 1.604191541  | 1.12E-14    | 2.87E-14    |
| PREX1      | 5.333059722 | 14.09112526 | 1.401751435  | 4.91E-29    | 3.92E-28    |
| CGAS       | 0.579969432 | 1.547722707 | 1.416098251  | 7.09E-29    | 5.56E-28    |
| LRRK2      | 6.140615806 | 13.11213786 | 1.094447681  | 9.90E-13    | 2.25E-12    |



Table S1. The differentially expressed genes(DEGs) were screened out in TCGA

| ID         | conMean     | treatMean   | logFC        | pValue      | FDR         |
|------------|-------------|-------------|--------------|-------------|-------------|
| E2F8       | 0.086575633 | 0.531694488 | 2.618564581  | 2.29E-33    | 3.49E-32    |
| GM2A       | 10.97664703 | 28.08748678 | 1.35549011   | 5.97E-36    | 1.67E-34    |
| GUCA2B     | 0.057989515 | 3.516992214 | 5.922406262  | 8.30E-23    | 3.77E-22    |
| TMIGD2     | 0.099493346 | 0.454141846 | 2.190471026  | 5.03E-29    | 4.00E-28    |
| BCL11A     | 0.160436965 | 0.475625296 | 1.567818863  | 1.73E-15    | 4.68E-15    |
| ATG16L2    | 0.670101101 | 3.480230744 | 2.376732278  | 5.17E-32    | 6.14E-31    |
| GBP5       | 0.402860415 | 4.777350086 | 3.567858643  | 7.89E-34    | 1.32E-32    |
| AGBL2      | 0.187472221 | 0.540246643 | 1.526941362  | 2.65E-18    | 8.63E-18    |
| GGTA1P     | 1.365545429 | 5.234507678 | 1.938576543  | 8.28E-32    | 9.45E-31    |
| GNB3       | 0.086716699 | 0.239588608 | 1.466177562  | 0.004864243 | 0.005941053 |
| AC099687.1 | 0.136221711 | 0.27556808  | 1.016452124  | 0.001397868 | 0.001779686 |
| HNRNPA1P2  | 0.045625098 | 0.228187521 | 2.322320347  | 5.17E-19    | 1.77E-18    |
| RAD54L     | 0.174777705 | 0.998978966 | 2.514933138  | 5.97E-34    | 1.02E-32    |
| LPIN3      | 3.327830181 | 9.995920641 | 1.586757633  | 1.88E-23    | 9.02E-23    |
| AC015987.1 | 0.119984786 | 0.292664956 | 1.28639852   | 8.83E-07    | 1.39E-06    |
| MCHR1      | 0.087334375 | 4.565749915 | 5.708158423  | 1.85E-25    | 1.05E-24    |
| SPIB       | 0.110725189 | 0.28049537  | 1.340993502  | 2.77E-11    | 5.74E-11    |
| RNU6-953P  | 0.018421721 | 0.49044612  | 4.734614911  | 2.99E-14    | 7.48E-14    |
| ESM1       | 8.264372046 | 103.5572073 | 3.647378951  | 2.79E-37    | 1.26E-35    |
| IGLC3      | 27.01878303 | 171.6655449 | 2.667565904  | 1.29E-08    | 2.28E-08    |
| RNU6-595P  | 0.160492825 | 0.488815254 | 1.606780508  | 4.85E-06    | 7.27E-06    |
| EGFR-AS1   | 0.162631198 | 5.553533335 | 5.093730003  | 3.10E-27    | 2.05E-26    |
| PCK2       | 50.91182556 | 10.95643502 | -2.216222344 | 1.11E-09    | 2.09E-09    |
| EIF1P6     | 0.189538861 | 0.684150464 | 1.851819979  | 1.98E-10    | 3.91E-10    |
| AC092834.1 | 0.242454634 | 0.890098725 | 1.87625053   | 1.01E-07    | 1.69E-07    |
| AP4B1-AS1  | 0.070945853 | 0.245309291 | 1.789811615  | 3.36E-15    | 8.91E-15    |
| EPB41L4B   | 3.736502288 | 0.31595678  | -3.563889277 | 1.09E-38    | 8.09E-37    |
| APOBEC3H   | 0.215014276 | 1.599652516 | 2.895254191  | 3.68E-36    | 1.08E-34    |
| RALYL      | 3.662808025 | 0.072170966 | -5.665387711 | 5.02E-42    | 2.03E-39    |
| NDUFB8P2   | 0.094187408 | 0.230861562 | 1.293421881  | 7.21E-09    | 1.29E-08    |
| PAH        | 37.24339022 | 5.445535652 | -2.773838534 | 5.88E-12    | 1.27E-11    |
| GGH        | 14.24268686 | 5.517472686 | -1.368141847 | 1.86E-15    | 5.04E-15    |
| LGALS9     | 2.135658654 | 9.548851391 | 2.160646128  | 5.08E-36    | 1.45E-34    |
| TRBV7-4    | 0.033955945 | 0.282215242 | 3.055059823  | 8.58E-14    | 2.08E-13    |
| PCLAF      | 0.335500439 | 1.545367802 | 2.203563686  | 9.52E-35    | 1.94E-33    |
| AC093525.8 | 0.355696656 | 0.906666104 | 1.349923938  | 1.83E-10    | 3.61E-10    |
| NHP2P1     | 0.098099588 | 0.221249291 | 1.17335384   | 4.62E-05    | 6.50E-05    |
| ACTG1P3    | 0.111938717 | 0.320383975 | 1.517092878  | 9.44E-22    | 3.97E-21    |
| LBX2       | 0.120267261 | 0.506846629 | 2.075305285  | 3.60E-31    | 3.74E-30    |
| AC010326.3 | 1.614871008 | 3.366571839 | 1.05986132   | 2.50E-16    | 7.14E-16    |
| DLX1       | 0.029448873 | 0.269472099 | 3.19385156   | 1.34E-33    | 2.12E-32    |
| RNU6-100P  | 0.187231295 | 0.58801782  | 1.651038281  | 3.91E-10    | 7.55E-10    |
| JUP        | 94.19718042 | 45.92781022 | -1.036315877 | 1.16E-30    | 1.12E-29    |
| GSTO2      | 2.900973017 | 0.828437673 | -1.80807181  | 1.97E-33    | 3.04E-32    |
| GLRB       | 2.664312121 | 1.134932246 | -1.231156929 | 8.22E-21    | 3.21E-20    |
| AC010973.2 | 0.170749117 | 0.775083363 | 2.182473371  | 4.60E-24    | 2.31E-23    |
| LINC02526  | 0.05494887  | 1.075609227 | 4.29092041   | 1.33E-32    | 1.77E-31    |
| AL451064.2 | 0.097109848 | 0.233696517 | 1.266946724  | 1.31E-05    | 1.92E-05    |
| AC100803.3 | 0.062379176 | 0.517254557 | 3.051738052  | 7.77E-16    | 2.15E-15    |
| INPP5J     | 12.69138305 | 3.056462871 | -2.05391435  | 3.99E-36    | 1.16E-34    |
| PLEKHG2    | 1.843376396 | 6.261068511 | 1.764058205  | 1.22E-32    | 1.64E-31    |
| RPL18P10   | 0.034062344 | 0.28931865  | 3.086409715  | 4.85E-20    | 1.80E-19    |
| OLFML2A    | 3.795180365 | 25.06617713 | 2.72350163   | 7.85E-33    | 1.08E-31    |
| CNTN3      | 1.863694217 | 0.564183385 | -1.723929086 | 9.38E-34    | 1.54E-32    |
| AC069549.1 | 0.082428281 | 0.460471051 | 2.48189915   | 6.82E-14    | 1.66E-13    |

Table S1. The differentially expressed genes(DEGs) were screened out in TCGA

| ID         | conMean     | treatMean   | logFC        | pValue      | FDR         |
|------------|-------------|-------------|--------------|-------------|-------------|
| MIR6769A   | 0.084377388 | 0.374794181 | 2.151170228  | 1.43E-08    | 2.52E-08    |
| CYP4A22    | 8.167694856 | 2.459057687 | -1.731823389 | 1.63E-07    | 2.69E-07    |
| AC087854.1 | 0.060331085 | 0.225822624 | 1.904216597  | 1.55E-13    | 3.69E-13    |
| SIM1       | 10.17692438 | 1.235908632 | -3.041657625 | 5.30E-38    | 3.13E-36    |
| MIR643     | 0.05137386  | 0.333085742 | 2.696787227  | 4.31E-09    | 7.84E-09    |
| PLA2G16    | 20.04850131 | 42.23984463 | 1.075110134  | 4.40E-28    | 3.16E-27    |
| GNA15      | 0.868479335 | 2.909155838 | 1.744037155  | 1.10E-28    | 8.42E-28    |
| AP000346.2 | 0.40175776  | 1.076007716 | 1.42129063   | 2.89E-08    | 4.98E-08    |
| TRPV2      | 1.881719088 | 7.448069868 | 1.984815335  | 9.86E-37    | 3.61E-35    |
| AC007786.1 | 0.494151987 | 0.235284511 | -1.070548493 | 3.71E-08    | 6.36E-08    |
| IGHV3-33   | 4.261851907 | 20.08033199 | 2.236230754  | 5.44E-06    | 8.13E-06    |
| SNORA16B   | 0.268873851 | 0.557573619 | 1.052232848  | 0.004859514 | 0.005936138 |
| GOLGA2P5   | 0.582708539 | 1.390029895 | 1.254269554  | 8.05E-10    | 1.53E-09    |
| MXRA8      | 9.013715097 | 21.06605582 | 1.224726469  | 3.10E-06    | 4.71E-06    |
| MCM10      | 0.085175469 | 0.404863489 | 2.248925649  | 1.70E-34    | 3.27E-33    |
| MIR29B2CHC | 0.276192233 | 0.651519178 | 1.238134897  | 2.20E-05    | 3.16E-05    |
| AL365181.2 | 0.130982067 | 1.030728596 | 2.9762233    | 2.91E-27    | 1.93E-26    |
| AC112722.1 | 0.090853519 | 0.328100664 | 1.852524204  | 5.18E-15    | 1.36E-14    |
| AC006159.2 | 1.363246646 | 0.514752449 | -1.405095913 | 1.04E-06    | 1.64E-06    |
| ZMIZ1-AS1  | 0.141731074 | 0.284793205 | 1.006758623  | 1.36E-06    | 2.11E-06    |
| RNU6-226P  | 0.02020744  | 0.437624079 | 4.436733633  | 4.31E-18    | 1.38E-17    |
| CCDC186    | 7.462750125 | 3.09973346  | -1.267563215 | 6.80E-38    | 3.81E-36    |
| IFITM10    | 1.040091779 | 2.652543968 | 1.350665825  | 6.94E-11    | 1.40E-10    |
| AL391056.1 | 0.074862035 | 0.314505309 | 2.070778201  | 1.59E-10    | 3.15E-10    |
| GRB14      | 10.79335464 | 4.168165002 | -1.372659038 | 2.16E-30    | 2.03E-29    |
| RPS15AP16  | 0.089178683 | 0.294800287 | 1.724967136  | 3.60E-08    | 6.18E-08    |
| MMP17      | 0.102019445 | 0.408242739 | 2.000583072  | 1.12E-07    | 1.86E-07    |
| CLRN3      | 12.60649473 | 36.52594955 | 1.534754593  | 2.63E-18    | 8.58E-18    |
| FKBP11     | 1.354539188 | 5.232706036 | 1.949755081  | 1.28E-34    | 2.54E-33    |
| RNY1P13    | 0.133820204 | 0.605588657 | 2.178042236  | 3.72E-11    | 7.66E-11    |
| RPS15P5    | 0.167779309 | 0.389988864 | 1.216868121  | 2.19E-08    | 3.80E-08    |
| AC015660.4 | 0.025210355 | 0.23617157  | 3.22774694   | 1.73E-26    | 1.07E-25    |
| IFI27      | 12.47682479 | 33.68974983 | 1.433058884  | 2.60E-21    | 1.06E-20    |
| CNIH2      | 0.074387138 | 0.288520877 | 1.955550609  | 1.10E-27    | 7.56E-27    |
| SNRPN      | 49.15339014 | 20.8401164  | -1.237927588 | 1.22E-38    | 9.02E-37    |
| DLX5       | 0.13884758  | 1.46357556  | 3.397923289  | 4.90E-36    | 1.40E-34    |
| NLRC3      | 0.686245461 | 1.779143488 | 1.374386262  | 8.05E-28    | 5.60E-27    |
| WLS        | 43.93294708 | 16.04694347 | -1.453004753 | 6.23E-39    | 5.08E-37    |
| PYGO1      | 1.047223397 | 0.333787794 | -1.64956613  | 3.08E-28    | 2.25E-27    |
| RNU2-52P   | 0.087830817 | 0.683435523 | 2.960006112  | 1.76E-25    | 9.99E-25    |
| MIR6774    | 0.076657988 | 0.497287856 | 2.697573171  | 9.90E-10    | 1.87E-09    |
| AC018638.4 | 2.373337549 | 5.986953344 | 1.334904725  | 7.81E-19    | 2.64E-18    |
| SNORD14E   | 1.042713769 | 3.311364663 | 1.667082711  | 0.002177275 | 0.002728951 |
| INSYN1-AS1 | 1.006203196 | 0.272172674 | -1.886327545 | 4.63E-38    | 2.77E-36    |
| MIR6739    | 0.142965758 | 0.585424809 | 2.033814237  | 2.31E-10    | 4.52E-10    |
| HAPLN1     | 0.244811734 | 2.782122133 | 3.50644114   | 1.39E-30    | 1.33E-29    |
| TIGIT      | 0.162190975 | 1.226441911 | 2.918713456  | 5.67E-29    | 4.49E-28    |
| MIR548AA2  | 0.197358683 | 1.553989385 | 2.977084748  | 1.55E-14    | 3.96E-14    |
| TXNP6      | 0.145196381 | 0.323713696 | 1.156712914  | 0.001276512 | 0.001630122 |
| MGARP      | 0.743015113 | 6.110280274 | 3.039775097  | 5.93E-08    | 1.00E-07    |
| AL139125.2 | 0.044896302 | 0.424510114 | 3.24113039   | 2.84E-37    | 1.27E-35    |
| DRICH1     | 0.177231052 | 0.38812511  | 1.130890378  | 0.000669908 | 0.000871041 |
| CCDC57     | 0.937289574 | 1.955805057 | 1.061195839  | 9.16E-12    | 1.96E-11    |
| PARD3B     | 4.884027903 | 1.869769577 | -1.385210953 | 2.52E-37    | 1.16E-35    |
| DGKI       | 0.384588485 | 1.220309835 | 1.665860021  | 0.007375358 | 0.008891718 |

Table S1. The differentially expressed genes(DEGs) were screened out in TCGA

| ID         | conMean     | treatMean   | logFC        | pValue   | FDR      |
|------------|-------------|-------------|--------------|----------|----------|
| RNU6-485P  | 1.109776618 | 3.058514369 | 1.462561742  | 2.94E-12 | 6.49E-12 |
| TCEAL2     | 6.656771994 | 0.792506831 | -3.070327479 | 2.69E-36 | 8.27E-35 |
| IGKV1-17   | 4.290085233 | 22.96411421 | 2.42030292   | 2.85E-05 | 4.06E-05 |
| RF02119    | 0.123521104 | 0.737539559 | 2.577962878  | 4.15E-05 | 5.85E-05 |
| ANGPTL4    | 11.07169999 | 340.8253171 | 4.944083844  | 1.58E-36 | 5.32E-35 |
| AC108673.3 | 1.135737843 | 2.338143563 | 1.041733652  | 2.45E-10 | 4.79E-10 |
| SLC13A2    | 18.49248723 | 0.775387295 | -4.575878374 | 2.76E-37 | 1.25E-35 |
| AC116914.2 | 0.236940207 | 1.374503062 | 2.536315183  | 1.69E-22 | 7.51E-22 |
| CARMIL3    | 0.182647461 | 0.44081546  | 1.271113128  | 1.56E-06 | 2.40E-06 |
| HPCAL1     | 10.36381203 | 37.4564472  | 1.85365931   | 2.83E-31 | 2.99E-30 |
| TOLLIP-AS1 | 2.175561569 | 1.055290324 | -1.043747889 | 6.66E-16 | 1.85E-15 |
| FAM78B     | 0.308671312 | 0.811937931 | 1.39529804   | 1.46E-16 | 4.23E-16 |
| NOD2       | 0.166210027 | 0.927548648 | 2.480415529  | 2.52E-31 | 2.68E-30 |
| CORO6      | 0.093570706 | 0.407864287 | 2.123960347  | 3.06E-11 | 6.34E-11 |
| MTRFR2     | 0.176809933 | 0.497462755 | 1.492389187  | 6.04E-29 | 4.78E-28 |
| SOWAHD     | 0.537704422 | 1.103217165 | 1.036831567  | 1.27E-12 | 2.86E-12 |
| AC010201.1 | 0.285731236 | 0.685727333 | 1.262976268  | 4.87E-07 | 7.78E-07 |
| AC007728.2 | 0.057291831 | 0.301434979 | 2.395445492  | 5.75E-29 | 4.55E-28 |
| RPL18A     | 37.21040181 | 79.90811203 | 1.102636     | 6.21E-30 | 5.49E-29 |
| GPR171     | 0.414092141 | 1.356570128 | 1.711939902  | 2.10E-20 | 7.96E-20 |
| CYP2D8P    | 0.034565439 | 0.249633869 | 2.852411511  | 2.87E-22 | 1.26E-21 |
| TNFRSF25   | 0.642991257 | 2.448286157 | 1.928901165  | 1.19E-19 | 4.27E-19 |
| CARD16     | 1.644555668 | 6.222953559 | 1.919901636  | 2.03E-34 | 3.82E-33 |
| RNU6-757P  | 0.033595706 | 0.276248462 | 3.039617698  | 4.01E-10 | 7.73E-10 |
| AC012368.1 | 0.659458854 | 1.997190781 | 1.5986176    | 2.81E-16 | 8.01E-16 |
| GRIA4      | 0.134677913 | 1.78667502  | 3.729692075  | 8.53E-06 | 1.26E-05 |
| SLC16A7    | 9.963696342 | 2.461580264 | -2.017096272 | 1.74E-35 | 4.30E-34 |
| KIAA1522   | 27.55112875 | 10.28176591 | -1.422023355 | 3.53E-37 | 1.53E-35 |
| PCDHB10    | 0.623858614 | 2.063701843 | 1.725943539  | 9.68E-29 | 7.47E-28 |
| VTCN1      | 17.16196353 | 1.604722277 | -3.418819081 | 5.20E-38 | 3.09E-36 |
| AP001107.1 | 0.113967598 | 0.286788425 | 1.33136309   | 1.38E-16 | 4.01E-16 |
| AL035661.1 | 29.66427933 | 2.555782522 | -3.53688975  | 1.54E-36 | 5.24E-35 |
| AC073476.1 | 0.244196016 | 0.519466041 | 1.088989776  | 1.08E-05 | 1.58E-05 |
| ESRRB      | 12.01685323 | 0.186421239 | -6.010349107 | 3.15E-41 | 9.02E-39 |
| PSMD6-AS2  | 0.151897706 | 0.310682803 | 1.032342307  | 6.43E-06 | 9.56E-06 |
| RPL21P44   | 0.087672888 | 0.288016798 | 1.715950279  | 2.71E-13 | 6.37E-13 |
| F12        | 0.653473489 | 2.130439221 | 1.70495028   | 3.18E-09 | 5.82E-09 |
| PARVB      | 2.8279185   | 5.831700192 | 1.04417601   | 9.82E-20 | 3.56E-19 |
| RAB3C      | 0.099666209 | 0.266920395 | 1.421233183  | 5.35E-12 | 1.16E-11 |
| TRIM59     | 0.395178513 | 0.8902319   | 1.171676694  | 7.43E-30 | 6.49E-29 |
| HLA-W      | 0.17061659  | 0.419000128 | 1.296192753  | 5.75E-17 | 1.71E-16 |
| AL122125.1 | 0.05372958  | 0.398730479 | 2.891625425  | 1.22E-22 | 5.48E-22 |
| RSRP1      | 3.185366208 | 6.733553978 | 1.079908919  | 1.53E-08 | 2.68E-08 |
| SH3D21     | 1.316743254 | 3.715853175 | 1.496719429  | 1.06E-23 | 5.19E-23 |
| KCNIP1     | 1.127209279 | 0.451201788 | -1.320910702 | 8.55E-28 | 5.94E-27 |
| AC067945.3 | 0.046420783 | 0.295643446 | 2.671015532  | 3.57E-25 | 1.97E-24 |
| AC069499.1 | 0.158084682 | 0.980618694 | 2.632994688  | 6.65E-27 | 4.26E-26 |
| VWA7       | 4.781047306 | 1.634967343 | -1.548064861 | 1.65E-36 | 5.50E-35 |
| REEP6      | 9.289523868 | 1.158690633 | -3.003109231 | 6.13E-36 | 1.71E-34 |
| INHBE      | 0.114432542 | 1.186352414 | 3.373963352  | 7.23E-18 | 2.29E-17 |
| SCARNA6    | 0.146265926 | 18.81642477 | 7.007255006  | 2.80E-19 | 9.78E-19 |
| NR1H3      | 4.204288542 | 8.723172943 | 1.052991307  | 5.41E-30 | 4.81E-29 |
| LINC02084  | 0.147411539 | 0.832738078 | 2.49801334   | 9.70E-27 | 6.13E-26 |
| AC113410.1 | 0.212526332 | 0.531048694 | 1.321202554  | 5.17E-09 | 9.35E-09 |
| PLOD2      | 13.39686915 | 44.16285257 | 1.72093748   | 1.73E-28 | 1.30E-27 |

Table S1. The differentially expressed genes(DEGs) were screened out in TCGA

| ID          | conMean     | treatMean   | logFC        | pValue      | FDR         |
|-------------|-------------|-------------|--------------|-------------|-------------|
| MTFP1       | 2.706267047 | 8.233979576 | 1.605285663  | 4.44E-34    | 7.83E-33    |
| SNORD116-1  | 0.11945121  | 0.447828392 | 1.906524534  | 0.01138963  | 0.013520712 |
| THEMIS      | 0.240537162 | 1.168348983 | 2.280139563  | 1.55E-22    | 6.91E-22    |
| IGHV3-38    | 0.087050101 | 0.509610854 | 2.54947813   | 3.37E-05    | 4.77E-05    |
| HIST1H2AD   | 0.309245493 | 1.089917931 | 1.817395033  | 0.000185212 | 0.000250272 |
| CCR8        | 0.036456592 | 0.258426905 | 2.825504683  | 3.29E-22    | 1.43E-21    |
| AL031847.1  | 1.477750957 | 0.610162816 | -1.276136987 | 4.73E-26    | 2.82E-25    |
| AC010616.1  | 0.029979616 | 0.227607406 | 2.924493704  | 2.96E-26    | 1.80E-25    |
| NRP2        | 1.891662182 | 6.209033214 | 1.714714178  | 5.06E-28    | 3.60E-27    |
| CCDC14      | 1.422956832 | 3.208672999 | 1.173084874  | 4.55E-20    | 1.69E-19    |
| SHISAL2A    | 0.125346351 | 0.443073601 | 1.821626369  | 6.65E-26    | 3.92E-25    |
| IGHV3OR15-1 | 0.108057597 | 0.650552249 | 2.589864426  | 0.000694209 | 0.000901842 |
| DNAJC12     | 4.682203842 | 1.89868067  | -1.302190458 | 1.44E-06    | 2.24E-06    |
| SLC27A4     | 15.74103956 | 7.662653496 | -1.038614847 | 1.58E-33    | 2.47E-32    |
| AC004890.1  | 0.46476678  | 0.975070881 | 1.069000143  | 4.73E-13    | 1.10E-12    |
| ANKRD36B    | 0.108212981 | 0.300703552 | 1.474468344  | 6.12E-15    | 1.60E-14    |
| CLUL1       | 1.971198492 | 0.177300591 | -3.474803806 | 2.37E-40    | 3.97E-38    |
| RNU7-140P   | 0.336236857 | 0.988752    | 1.556130832  | 6.30E-08    | 1.07E-07    |
| EYA2        | 2.492329667 | 1.022485108 | -1.285415078 | 1.62E-18    | 5.36E-18    |
| FTHIP1      | 0.097531    | 0.283504754 | 1.539440171  | 6.35E-09    | 1.14E-08    |
| GVQW3       | 0.204888864 | 0.43462935  | 1.084944028  | 2.19E-12    | 4.87E-12    |
| CYCSP40     | 0.068038035 | 0.393371421 | 2.531478763  | 7.02E-10    | 1.34E-09    |
| TCHH        | 0.108706385 | 0.293732227 | 1.434064886  | 4.35E-09    | 7.90E-09    |
| GPHN        | 7.626959444 | 3.526872305 | -1.112718686 | 2.94E-28    | 2.15E-27    |
| AC093388.1  | 0.616402349 | 1.551980007 | 1.332165709  | 3.89E-26    | 2.34E-25    |
| S1PR5       | 0.299206805 | 1.603826287 | 2.422302997  | 4.29E-32    | 5.16E-31    |
| FP671120.4  | 0.378018616 | 0.843376641 | 1.157719779  | 0.002796022 | 0.003475068 |
| TCF19       | 3.333770403 | 8.416378659 | 1.336044865  | 5.13E-21    | 2.04E-20    |
| FAM107A     | 17.70996376 | 6.201400776 | -1.513895226 | 4.85E-34    | 8.44E-33    |
| HSD17B3     | 0.084911115 | 0.735941346 | 3.115565469  | 5.09E-24    | 2.55E-23    |
| CRHBP       | 13.7814243  | 0.877572875 | -3.973062252 | 9.08E-33    | 1.24E-31    |
| AC068620.2  | 0.194321181 | 0.484051145 | 1.31671633   | 4.62E-09    | 8.38E-09    |
| AL355075.2  | 0.189104686 | 0.720110146 | 1.929032477  | 1.15E-13    | 2.77E-13    |
| LAMC1-AS1   | 0.227818218 | 0.601305107 | 1.40021409   | 5.07E-14    | 1.25E-13    |
| AC147067.1  | 0.54967441  | 1.194309481 | 1.119527509  | 9.27E-18    | 2.91E-17    |
| AC015845.2  | 1.708304026 | 0.836162865 | -1.030708876 | 1.83E-31    | 1.99E-30    |
| AC026369.2  | 0.439149282 | 5.670779166 | 3.690763625  | 1.27E-37    | 6.41E-36    |
| CYP1A1      | 0.93614846  | 0.110894701 | -3.077546904 | 4.58E-28    | 3.28E-27    |
| SLFN11      | 3.083823514 | 10.18932426 | 1.72426627   | 1.35E-29    | 1.15E-28    |
| LAD1        | 24.96643559 | 3.950002032 | -2.660064565 | 7.81E-38    | 4.29E-36    |
| DIRAS3      | 4.383876575 | 1.240958533 | -1.820752273 | 3.48E-33    | 5.13E-32    |
| TBC1D3L     | 0.051281753 | 0.239612384 | 2.224184994  | 4.32E-14    | 1.07E-13    |
| LINC02154   | 0.023894145 | 0.33760518  | 3.820607981  | 1.13E-16    | 3.29E-16    |
| AP001458.1  | 0.07706929  | 0.522679203 | 2.761697745  | 8.78E-14    | 2.13E-13    |
| IGHV3-73    | 1.720516429 | 20.65981033 | 3.585913436  | 0.001871801 | 0.002357991 |
| RN7SL364P   | 0.057771776 | 0.525579516 | 3.18547231   | 4.03E-16    | 1.14E-15    |
| C6orf223    | 1.300641026 | 15.03410088 | 3.530943847  | 1.71E-30    | 1.62E-29    |
| AC058791.1  | 0.041256254 | 0.429342839 | 3.379445387  | 0.000454747 | 0.000597988 |
| RPS27AP12   | 0.107556965 | 0.220663632 | 1.036747922  | 4.41E-05    | 6.20E-05    |
| AC002044.1  | 0.077712297 | 0.555233319 | 2.836879338  | 4.49E-12    | 9.79E-12    |
| ZDHHC20P1   | 0.100378211 | 0.420559926 | 2.066865243  | 2.12E-25    | 1.20E-24    |
| AC007390.2  | 0.228447058 | 0.470540232 | 1.042458216  | 4.31E-11    | 8.82E-11    |
| LINC00844   | 5.424967486 | 2.395979172 | -1.178999124 | 3.17E-14    | 7.91E-14    |
| AC068790.3  | 0.146629954 | 0.547016098 | 1.899403435  | 5.38E-21    | 2.13E-20    |
| C3orf67     | 0.17337756  | 0.551913801 | 1.670525773  | 2.06E-28    | 1.53E-27    |

Table S1. The differentially expressed genes(DEGs) were screened out in TCGA

| ID          | conMean     | treatMean   | logFC        | pValue      | FDR         |
|-------------|-------------|-------------|--------------|-------------|-------------|
| AC104843.1  | 0.087905748 | 0.223813847 | 1.348269898  | 1.03E-10    | 2.06E-10    |
| IGHV3-66    | 1.470538824 | 7.11600166  | 2.274721973  | 9.28E-05    | 0.000127874 |
| UGT2B27P    | 0.066864581 | 0.270220892 | 2.014825119  | 1.26E-05    | 1.84E-05    |
| IGHV3-15    | 8.033585604 | 37.07454247 | 2.206312939  | 2.80E-05    | 3.99E-05    |
| PPIL6       | 1.925452394 | 0.954048985 | -1.013062207 | 3.29E-31    | 3.44E-30    |
| NLRC4       | 0.380052118 | 1.354477894 | 1.833467669  | 1.00E-31    | 1.13E-30    |
| ADGRE4P     | 0.022553551 | 0.416372826 | 4.206449401  | 1.01E-35    | 2.66E-34    |
| AL590428.1  | 0.08662498  | 0.375642895 | 2.116506799  | 5.60E-27    | 3.61E-26    |
| AFP         | 0.73710173  | 0.147390728 | -2.32221797  | 4.05E-09    | 7.38E-09    |
| BX255925.1  | 0.260464784 | 0.788156688 | 1.597394143  | 6.32E-19    | 2.15E-18    |
| PCDHGB7     | 1.576728686 | 3.884412815 | 1.3007621    | 0.016941709 | 0.019828089 |
| ASB9        | 4.991026403 | 2.440245805 | -1.032310058 | 1.62E-21    | 6.72E-21    |
| FASLG       | 0.139840728 | 1.632608074 | 3.545321997  | 3.64E-35    | 8.23E-34    |
| IGHV3-35    | 0.150863298 | 0.560083236 | 1.892399377  | 0.000404838 | 0.000534386 |
| AC125611.1  | 0.066061357 | 0.476373837 | 2.85021568   | 3.37E-11    | 6.96E-11    |
| AC021549.1  | 0.508591118 | 0.244658088 | -1.055739294 | 0.001688019 | 0.002135619 |
| PLIN5       | 1.409475043 | 0.492997434 | -1.515505891 | 2.50E-29    | 2.06E-28    |
| PKD1P6-NPII | 0.151196594 | 0.462560815 | 1.613217411  | 2.94E-25    | 1.63E-24    |
| AC078899.2  | 0.047805215 | 0.25193646  | 2.397820016  | 8.95E-09    | 1.60E-08    |
| LINC01270   | 0.061485005 | 0.224580755 | 1.868927804  | 7.15E-29    | 5.59E-28    |
| AC073869.1  | 1.653146038 | 4.566101295 | 1.465748688  | 1.33E-22    | 5.95E-22    |
| AL359220.1  | 0.091878044 | 0.227215479 | 1.306269066  | 3.82E-12    | 8.38E-12    |
| SLC35F3     | 0.33807858  | 0.786698256 | 1.218451773  | 0.042240454 | 0.047924968 |
| CCDC88B     | 0.381502054 | 2.277299562 | 2.57756135   | 8.93E-37    | 3.37E-35    |
| DOK3        | 0.498618026 | 3.108907502 | 2.640400747  | 5.02E-39    | 4.24E-37    |
| RN7SL444P   | 0.044043787 | 0.230355425 | 2.386851157  | 1.31E-08    | 2.31E-08    |
| AC006435.2  | 0.201304351 | 0.937788223 | 2.219883808  | 2.41E-15    | 6.47E-15    |
| PELI2       | 5.099335528 | 2.226575202 | -1.195482929 | 5.37E-35    | 1.17E-33    |
| TAL1        | 0.886836775 | 1.828429014 | 1.043864116  | 5.62E-10    | 1.08E-09    |
| LSMEM1      | 0.239030119 | 0.881811679 | 1.883278166  | 3.83E-23    | 1.79E-22    |
| AC090695.1  | 0.089218926 | 0.235541307 | 1.400558406  | 1.24E-11    | 2.63E-11    |
| NTS         | 1.858870504 | 0.837367851 | -1.150492836 | 0.00104296  | 0.001339768 |
| FAM198B     | 5.807211528 | 13.6407845  | 1.232009128  | 7.84E-16    | 2.17E-15    |
| AP000229.1  | 0.783941404 | 0.373593158 | -1.069277791 | 6.12E-23    | 2.82E-22    |
| SNORA69     | 0.038124078 | 0.243211054 | 2.673434439  | 1.02E-10    | 2.05E-10    |
| TGFB1       | 14.84169029 | 43.80108268 | 1.561311124  | 8.28E-32    | 9.45E-31    |
| SH2B2       | 1.132430458 | 2.796845824 | 1.304378269  | 5.11E-29    | 4.06E-28    |
| AC008737.1  | 0.105066975 | 0.532859648 | 2.342446315  | 6.62E-16    | 1.84E-15    |
| AC245595.1  | 0.382981501 | 1.086455469 | 1.504282432  | 1.28E-16    | 3.73E-16    |
| TPBGL       | 0.118207265 | 0.58470706  | 2.306395304  | 1.26E-13    | 3.04E-13    |
| SLA2        | 0.277966546 | 2.135034307 | 2.941276083  | 1.46E-34    | 2.86E-33    |
| MIR4635     | 0.494761926 | 2.55712854  | 2.369718293  | 1.17E-11    | 2.48E-11    |
| CD48        | 1.921758003 | 7.55138923  | 1.974315405  | 5.84E-27    | 3.75E-26    |
| LAMA2       | 2.915384071 | 1.03766252  | -1.490348645 | 1.40E-21    | 5.80E-21    |
| ATP1A3      | 0.105380447 | 0.529069591 | 2.327850293  | 8.22E-14    | 2.00E-13    |
| MIR320E     | 0.214871935 | 1.545851342 | 2.846852624  | 5.78E-23    | 2.66E-22    |
| PDE7A       | 2.547677325 | 5.983789267 | 1.231876803  | 4.09E-22    | 1.77E-21    |
| AC104986.1  | 0.136306116 | 0.282758593 | 1.052720571  | 6.79E-06    | 1.01E-05    |
| PSORS1C2    | 0.028610678 | 0.396213274 | 3.791651622  | 9.93E-31    | 9.75E-30    |
| AC104076.1  | 0.597276423 | 0.189041662 | -1.659694559 | 2.31E-18    | 7.57E-18    |
| HLA-DQA1    | 8.914367764 | 42.15292427 | 2.241428333  | 2.25E-28    | 1.66E-27    |
| C20orf202   | 0.278351811 | 0.714462339 | 1.359948495  | 5.44E-25    | 2.96E-24    |
| AP003717.1  | 0.018590934 | 0.61040162  | 5.037087644  | 3.04E-26    | 1.85E-25    |
| AC021146.1  | 0.048532821 | 0.70549143  | 3.861595921  | 6.25E-18    | 1.98E-17    |
| AC090578.1  | 0.00251411  | 0.256400251 | 6.672205893  | 8.22E-10    | 1.56E-09    |

Table S1. The differentially expressed genes(DEGs) were screened out in TCGA

| ID         | conMean     | treatMean   | logFC        | pValue      | FDR         |
|------------|-------------|-------------|--------------|-------------|-------------|
| AL359921.1 | 0.201957473 | 0.551824854 | 1.450158909  | 2.66E-17    | 8.13E-17    |
| LINC01522  | 0.056872193 | 0.311726293 | 2.454484503  | 5.99E-12    | 1.30E-11    |
| SNORA63C   | 0.127585462 | 1.45115945  | 3.507670191  | 1.89E-06    | 2.91E-06    |
| ACTA2-AS1  | 0.422263699 | 0.946602767 | 1.164614912  | 1.22E-09    | 2.30E-09    |
| APOBEC3A   | 0.196572769 | 0.449295121 | 1.192599918  | 1.89E-12    | 4.21E-12    |
| MTMR11     | 4.119823125 | 13.10169104 | 1.669098728  | 6.55E-27    | 4.20E-26    |
| C6orf163   | 0.135513895 | 0.296971456 | 1.13188348   | 2.88E-09    | 5.29E-09    |
| AC015660.1 | 0.568763003 | 0.215263554 | -1.401723543 | 6.30E-20    | 2.31E-19    |
| AC242376.2 | 0.544661729 | 1.473717071 | 1.436027174  | 1.49E-07    | 2.46E-07    |
| AC120498.1 | 0.051367242 | 0.24354079  | 2.245242904  | 1.76E-07    | 2.90E-07    |
| PHKG1      | 0.124915627 | 0.494667456 | 1.985505018  | 4.45E-30    | 4.00E-29    |
| SNHG5      | 16.30645065 | 35.24465544 | 1.11196171   | 8.76E-19    | 2.95E-18    |
| NTNG2      | 0.131784685 | 0.440321129 | 1.740373358  | 1.85E-15    | 5.01E-15    |
| AL023653.1 | 0.087700191 | 0.540457459 | 2.623529174  | 6.89E-31    | 6.89E-30    |
| AGMO       | 1.726082529 | 3.492752007 | 1.016862766  | 4.19E-08    | 7.15E-08    |
| VWA1       | 13.89072419 | 34.44114168 | 1.310011151  | 8.94E-22    | 3.76E-21    |
| SLC38A4    | 3.795252662 | 1.237788183 | -1.61643148  | 7.64E-27    | 4.87E-26    |
| AC136475.9 | 0.140316014 | 0.367980649 | 1.390950232  | 5.36E-06    | 8.01E-06    |
| KCNE3      | 5.540530222 | 25.48950462 | 2.201807383  | 5.53E-33    | 7.87E-32    |
| AP000350.6 | 0.104887799 | 0.216718207 | 1.046973496  | 0.001511412 | 0.00191997  |
| MECOM      | 26.06859747 | 4.414945809 | -2.561845331 | 2.68E-40    | 4.35E-38    |
| AL355916.1 | 0.144584171 | 0.424047121 | 1.552314974  | 6.72E-12    | 1.45E-11    |
| TRAV29DV5  | 0.162362257 | 1.008920985 | 2.635524988  | 2.90E-19    | 1.01E-18    |
| HES4       | 1.831551906 | 9.072631117 | 2.308454414  | 7.02E-30    | 6.15E-29    |
| AC079848.1 | 1.393802986 | 0.390118514 | -1.83704228  | 3.51E-35    | 7.99E-34    |
| SPINK1     | 11.97785933 | 5.791864319 | -1.048270384 | 3.55E-15    | 9.43E-15    |
| LINC01587  | 0.25374638  | 2.348123509 | 3.21004915   | 6.02E-36    | 1.69E-34    |
| LINC01311  | 0.167618835 | 0.481194399 | 1.521435576  | 1.17E-14    | 3.00E-14    |
| NRARP      | 2.5812195   | 8.156627695 | 1.659919973  | 3.44E-22    | 1.49E-21    |
| AC093281.2 | 0.004856362 | 0.236493717 | 5.605782093  | 2.88E-21    | 1.17E-20    |
| AL590094.1 | 0.187699391 | 0.898105391 | 2.258460783  | 3.48E-29    | 2.82E-28    |
| AC004816.1 | 1.608546747 | 0.515132742 | -1.642741719 | 4.64E-34    | 8.11E-33    |
| SLC25A37   | 3.379612208 | 6.881191739 | 1.025800729  | 3.24E-17    | 9.81E-17    |
| LURAP1L    | 3.888376556 | 8.004429092 | 1.041630569  | 1.49E-16    | 4.33E-16    |
| AC012618.1 | 0.304502912 | 0.636235329 | 1.063104462  | 1.28E-07    | 2.13E-07    |
| MBOAT4     | 0.062224595 | 0.334017476 | 2.424366738  | 1.36E-35    | 3.45E-34    |
| ADGRE2     | 0.426565821 | 1.514130619 | 1.82764939   | 2.91E-27    | 1.93E-26    |
| NLRP11     | 0.155951383 | 0.328998202 | 1.076983355  | 0.000508529 | 0.000666813 |
| CYCSP24    | 0.0981778   | 0.254341126 | 1.373296007  | 4.32E-10    | 8.32E-10    |
| PINLYP     | 1.677479965 | 0.822805646 | -1.027671937 | 2.70E-23    | 1.28E-22    |
| BACH2      | 0.484030686 | 0.230260188 | -1.071833522 | 2.02E-21    | 8.30E-21    |
| HIST1H4J   | 0.050470749 | 0.244289287 | 2.275071192  | 2.22E-17    | 6.80E-17    |
| AC135279.1 | 0.053482805 | 0.232248698 | 2.118523477  | 2.77E-15    | 7.40E-15    |
| GDF3       | 2.173530581 | 0.470366337 | -2.208183676 | 1.58E-06    | 2.44E-06    |
| TNFRSF9    | 0.093367998 | 1.623367798 | 4.119917946  | 6.71E-31    | 6.72E-30    |
| UBBP1      | 0.413612079 | 0.860385185 | 1.056704363  | 3.18E-05    | 4.52E-05    |
| CTXN3      | 12.25457444 | 1.280067765 | -3.259028294 | 5.53E-26    | 3.28E-25    |
| PDCD4-AS1  | 1.183000264 | 2.892163312 | 1.289698624  | 2.61E-31    | 2.76E-30    |
| TNXA       | 0.069539539 | 0.531437018 | 2.933993321  | 1.92E-18    | 6.33E-18    |
| FOLR2      | 6.466904875 | 17.41474502 | 1.429162055  | 1.85E-16    | 5.33E-16    |
| RPS23P6    | 0.213341581 | 0.81017558  | 1.925069424  | 2.58E-07    | 4.19E-07    |
| AL162742.1 | 0.091800562 | 0.246667773 | 1.425994344  | 1.63E-05    | 2.37E-05    |
| MIR200CHG  | 2.760586858 | 0.476473598 | -2.534506816 | 1.27E-41    | 4.16E-39    |
| FOXA3      | 1.737423934 | 0.228240284 | -2.928324466 | 2.19E-34    | 4.11E-33    |
| TRBJ2-2    | 0.152181082 | 0.851993732 | 2.485053793  | 2.71E-14    | 6.78E-14    |

Table S1. The differentially expressed genes(DEGs) were screened out in TCGA

| ID         | conMean     | treatMean   | logFC        | pValue      | FDR         |
|------------|-------------|-------------|--------------|-------------|-------------|
| HSPB2      | 1.841623653 | 4.257944284 | 1.209178804  | 2.95E-16    | 8.39E-16    |
| PROCR      | 9.636000347 | 28.80449262 | 1.579787495  | 2.03E-29    | 1.68E-28    |
| FCRL3      | 0.075300144 | 0.560407206 | 2.895750971  | 2.37E-24    | 1.22E-23    |
| AL117379.1 | 0.36918492  | 1.101465494 | 1.57700877   | 3.60E-14    | 8.94E-14    |
| CDK5R1     | 0.419956603 | 0.907916837 | 1.112319906  | 1.48E-22    | 6.59E-22    |
| RNA5SP122  | 0.242232572 | 0.693711523 | 1.517942976  | 2.09E-07    | 3.42E-07    |
| AL355796.1 | 0.038769555 | 0.369023084 | 3.250714981  | 1.45E-12    | 3.25E-12    |
| AC019197.1 | 2.144548209 | 0.331330829 | -2.694329396 | 2.06E-35    | 4.98E-34    |
| ERAP2      | 6.136530688 | 12.91520588 | 1.073575484  | 1.61E-07    | 2.66E-07    |
| SYNGR1     | 7.219574208 | 2.76912741  | -1.382482318 | 1.58E-24    | 8.29E-24    |
| EDNRA      | 3.748537333 | 8.923995553 | 1.251362024  | 4.11E-18    | 1.32E-17    |
| MPP7       | 10.34143214 | 1.38458039  | -2.900915267 | 2.14E-38    | 1.44E-36    |
| AP000851.2 | 0.576450513 | 0.186025476 | -1.63169655  | 0.028759507 | 0.033065323 |
| MKRN2OS    | 0.391666953 | 0.182883715 | -1.098700793 | 3.86E-17    | 1.16E-16    |
| HIST1H4K   | 0.116288736 | 0.313935711 | 1.432757787  | 2.42E-05    | 3.47E-05    |
| RPL9P32    | 0.091462624 | 0.304001418 | 1.732823834  | 4.61E-13    | 1.07E-12    |
| AL645608.7 | 0.422838843 | 1.821948996 | 2.107302755  | 4.11E-18    | 1.32E-17    |
| ASB15      | 1.518333427 | 0.047306114 | -5.004318171 | 7.72E-31    | 7.67E-30    |
| F11        | 9.220758745 | 0.457322088 | -4.333602963 | 4.62E-39    | 3.95E-37    |
| SNORD59A   | 0.233576367 | 0.61247053  | 1.390746119  | 3.99E-06    | 6.01E-06    |
| TPD52L1    | 7.446355847 | 2.146230678 | -1.794729415 | 1.87E-32    | 2.42E-31    |
| TCL6       | 1.450816965 | 0.236554236 | -2.616622618 | 5.37E-20    | 1.98E-19    |
| IGKV1-5    | 22.94765016 | 75.37975577 | 1.715830692  | 0.00030553  | 0.000406846 |
| AC009318.4 | 0.186690033 | 0.440233933 | 1.237625446  | 2.14E-05    | 3.08E-05    |
| UPK3BL1    | 0.17193814  | 0.363960453 | 1.081892094  | 0.012751803 | 0.015077769 |
| GAS1       | 6.467211603 | 1.508430201 | -2.100095874 | 2.50E-36    | 7.76E-35    |
| AC069234.4 | 0.109205922 | 0.447202577 | 2.033877406  | 1.45E-25    | 8.32E-25    |
| AC007000.3 | 0.085740961 | 0.309708885 | 1.852856272  | 1.03E-08    | 1.83E-08    |
| KCNQ1      | 22.97739263 | 6.04657698  | -1.92602454  | 3.14E-37    | 1.38E-35    |
| AC096720.1 | 0.13269401  | 0.45714294  | 1.784542096  | 1.50E-10    | 2.98E-10    |
| AC018450.1 | 0.106235756 | 0.367007395 | 1.78853972   | 6.44E-19    | 2.19E-18    |
| AC092123.1 | 0.197116847 | 0.471718366 | 1.258874687  | 1.88E-07    | 3.09E-07    |
| CDH1       | 53.0348044  | 18.82839958 | -1.494029072 | 5.83E-31    | 5.89E-30    |
| ISM2       | 0.67842872  | 0.221270855 | -1.616383808 | 1.46E-27    | 9.93E-27    |
| AL359504.2 | 0.218444153 | 0.583593899 | 1.417700308  | 3.07E-10    | 5.97E-10    |
| AC091959.2 | 0.022174546 | 0.284801162 | 3.682978552  | 5.14E-15    | 1.35E-14    |
| PITX1      | 0.054145341 | 0.472970545 | 3.126841237  | 7.64E-06    | 1.13E-05    |
| IGHV3-47   | 0.125190355 | 0.443708721 | 1.825489495  | 5.84E-06    | 8.71E-06    |
| ARHGAP25   | 1.824978474 | 6.30563266  | 1.78876168   | 9.52E-35    | 1.94E-33    |
| MMP9       | 0.839206088 | 13.7903335  | 4.038488393  | 2.51E-25    | 1.40E-24    |
| NID1       | 16.64737272 | 43.57029422 | 1.388050345  | 5.35E-23    | 2.47E-22    |
| C1QTNF7    | 1.878741599 | 0.636098711 | -1.562444084 | 3.57E-30    | 3.26E-29    |
| SLC12A9-AS | 0.246444155 | 0.724152224 | 1.555032235  | 1.68E-18    | 5.56E-18    |
| AL031670.1 | 0.274296832 | 0.710435169 | 1.372965043  | 1.41E-11    | 2.97E-11    |
| INTS6L     | 0.546731767 | 1.918682509 | 1.811210896  | 8.93E-33    | 1.22E-31    |
| STARD9     | 0.373205973 | 1.107848869 | 1.569717104  | 2.62E-24    | 1.35E-23    |
| AC023669.2 | 0.277617916 | 1.903775793 | 2.777691001  | 0.000737398 | 0.000956319 |
| TSPAN6     | 27.33934792 | 11.27682915 | -1.277617369 | 6.74E-37    | 2.61E-35    |
| Z99129.1   | 0.13418389  | 0.357815735 | 1.415005355  | 1.65E-06    | 2.55E-06    |
| AL354760.1 | 0.153249355 | 0.376223902 | 1.295710506  | 2.75E-11    | 5.70E-11    |
| AC018638.6 | 0.134719301 | 0.31382091  | 1.219984929  | 0.000306772 | 0.000408474 |
| HECW2      | 1.392989002 | 3.988837624 | 1.517784529  | 4.34E-18    | 1.39E-17    |
| TREH       | 4.600384207 | 0.972181992 | -2.242456039 | 2.55E-18    | 8.33E-18    |
| GDPD5      | 0.506761117 | 1.322098542 | 1.383451975  | 8.00E-27    | 5.09E-26    |
| DWORF      | 1.079489333 | 0.23901996  | -2.175145981 | 0.002332512 | 0.002917305 |

Table S1. The differentially expressed genes(DEGs) were screened out in TCGA

| ID         | conMean     | treatMean   | logFC        | pValue      | FDR         |
|------------|-------------|-------------|--------------|-------------|-------------|
| SH3BP5-AS1 | 0.638036868 | 1.65920607  | 1.378781382  | 2.75E-13    | 6.47E-13    |
| AC012254.5 | 0.124196448 | 0.470878556 | 1.92273111   | 4.75E-13    | 1.11E-12    |
| SAP30L-AS1 | 0.154534974 | 0.361450494 | 1.225864678  | 5.90E-11    | 1.20E-10    |
| PRRG2      | 7.308763661 | 0.954691029 | -2.936521576 | 3.22E-38    | 2.05E-36    |
| FABP7      | 1.387057525 | 84.19427879 | 5.923622676  | 5.27E-37    | 2.14E-35    |
| AC026304.1 | 0.829610072 | 0.375193743 | -1.14479764  | 7.20E-23    | 3.29E-22    |
| PF4        | 0.194015017 | 0.417496776 | 1.105596737  | 0.000247616 | 0.000331853 |
| ESRP2      | 6.509789903 | 2.227626022 | -1.547103932 | 2.08E-35    | 5.01E-34    |
| NEU4       | 0.574721458 | 0.186410772 | -1.624377687 | 2.46E-21    | 1.01E-20    |
| RPS2P46    | 2.798286172 | 7.069824541 | 1.337130901  | 4.70E-22    | 2.02E-21    |
| UBBP5      | 0.130713044 | 0.396349174 | 1.600368847  | 2.05E-09    | 3.80E-09    |
| FAM222A    | 5.420689728 | 0.751000875 | -2.851589937 | 3.79E-39    | 3.43E-37    |
| HCP5B      | 0.073319582 | 0.22414191  | 1.612141958  | 7.93E-08    | 1.33E-07    |
| FKBP10     | 7.593420875 | 51.42166518 | 2.759554451  | 9.08E-33    | 1.24E-31    |
| CKAP2L     | 0.160201086 | 0.623318241 | 1.960085006  | 5.26E-32    | 6.24E-31    |
| CENPF      | 0.358114201 | 1.24944129  | 1.802791479  | 2.55E-30    | 2.37E-29    |
| FXYD5      | 8.884865472 | 29.48373252 | 1.730497338  | 2.20E-30    | 2.06E-29    |
| PACRG      | 3.786141279 | 1.598265931 | -1.244220772 | 4.65E-36    | 1.34E-34    |
| SCOCP1     | 0.11129943  | 0.230743545 | 1.051844081  | 3.27E-05    | 4.64E-05    |
| AC104564.3 | 0.177312788 | 0.780916822 | 2.138872305  | 7.16E-18    | 2.26E-17    |
| TNFSF15    | 1.742586521 | 0.749936981 | -1.216389015 | 2.42E-24    | 1.25E-23    |
| MAP4K1     | 0.514946375 | 2.758239705 | 2.421253734  | 7.55E-32    | 8.72E-31    |
| PGM5-AS1   | 0.803920373 | 0.291178654 | -1.465148016 | 2.52E-22    | 1.11E-21    |
| SLC6A12    | 24.70419853 | 10.77733745 | -1.196755448 | 4.05E-06    | 6.11E-06    |
| CDH9       | 0.730981499 | 0.17186065  | -2.088595639 | 1.93E-15    | 5.21E-15    |
| NCF1B      | 0.169723001 | 0.818902808 | 2.270510142  | 1.01E-30    | 9.95E-30    |
| TRADD      | 5.898320153 | 16.3220214  | 1.468443702  | 2.18E-36    | 6.93E-35    |
| TRGV5      | 0.128248552 | 0.435064862 | 1.762287971  | 4.56E-15    | 1.20E-14    |
| SELENBP1   | 34.06001181 | 10.23236685 | -1.734939042 | 7.53E-36    | 2.06E-34    |
| KRT81      | 0.036959353 | 0.422861431 | 3.516173567  | 2.80E-28    | 2.05E-27    |
| DRD4       | 0.160799212 | 0.651045903 | 2.01749893   | 1.40E-23    | 6.78E-23    |
| DIRAS1     | 2.707172581 | 0.517510289 | -2.387127409 | 1.41E-34    | 2.77E-33    |
| AL603756.1 | 0.103969939 | 0.264940797 | 1.349503552  | 1.75E-08    | 3.07E-08    |
| CORO7      | 0.567474408 | 1.642614053 | 1.533366309  | 1.24E-36    | 4.35E-35    |
| AC021087.3 | 0.123776637 | 1.83910556  | 3.893193352  | 1.72E-07    | 2.83E-07    |
| PNMA8A     | 13.29497021 | 3.630071438 | -1.872810699 | 1.24E-32    | 1.67E-31    |
| CA9        | 2.243136175 | 136.0519951 | 5.922497097  | 5.35E-38    | 3.16E-36    |
| AC015961.2 | 0.192925075 | 0.497627079 | 1.367024326  | 1.05E-09    | 1.98E-09    |
| GPR176     | 2.462149375 | 6.736636576 | 1.452110181  | 7.12E-26    | 4.19E-25    |
| ADGRF1     | 10.86227787 | 0.589864301 | -4.202799767 | 1.44E-38    | 1.01E-36    |
| VWA5A      | 9.1151085   | 4.026091521 | -1.178879861 | 2.27E-29    | 1.88E-28    |
| AC114803.1 | 0.088562714 | 2.628324025 | 4.891299902  | 3.59E-37    | 1.55E-35    |
| AL162411.1 | 1.294092243 | 0.621019402 | -1.059230209 | 1.99E-20    | 7.57E-20    |
| RNU6-510P  | 0.626875832 | 1.270246842 | 1.018857262  | 0.000336516 | 0.000446606 |
| RPS7P3     | 0.073770041 | 0.239179528 | 1.696986958  | 6.83E-14    | 1.67E-13    |
| AC090948.3 | 0.271798197 | 0.596721784 | 1.134522561  | 3.30E-07    | 5.33E-07    |
| SHC2       | 2.000505413 | 4.997053687 | 1.320713186  | 1.94E-17    | 5.96E-17    |
| RPL13      | 76.12893514 | 162.5812871 | 1.094644411  | 5.45E-29    | 4.32E-28    |
| ZNF710-AS1 | 14.8738353  | 5.864820571 | -1.342617827 | 6.37E-24    | 3.17E-23    |
| HLA-E      | 232.7418903 | 492.7907821 | 1.082244371  | 6.66E-31    | 6.67E-30    |
| CCL4       | 1.353069597 | 8.732162588 | 2.690102944  | 1.84E-32    | 2.39E-31    |
| AL132639.2 | 0.952499796 | 0.368891673 | -1.368521558 | 1.36E-28    | 1.04E-27    |
| LIPH       | 9.909148458 | 0.766007959 | -3.693329798 | 9.04E-39    | 6.89E-37    |
| SSTR5      | 1.622891918 | 0.109789717 | -3.88575208  | 4.63E-32    | 5.53E-31    |
| MICALL2    | 0.797501278 | 3.332508266 | 2.063049718  | 6.45E-33    | 9.06E-32    |



Table S1. The differentially expressed genes(DEGs) were screened out in TCGA

| ID         | conMean     | treatMean   | logFC        | pValue      | FDR         |
|------------|-------------|-------------|--------------|-------------|-------------|
| FDCSP      | 0.06956089  | 8.940201974 | 7.00588722   | 7.68E-05    | 0.000106372 |
| PNPLA3     | 1.083143219 | 0.381052559 | -1.507162107 | 0.002809059 | 0.00349106  |
| AL137024.1 | 0.099194831 | 0.247691933 | 1.320210039  | 0.000603152 | 0.000786676 |
| AC093788.1 | 0.138315563 | 0.584969991 | 2.080399126  | 3.62E-19    | 1.25E-18    |
| AC016705.2 | 3.459214514 | 1.275122663 | -1.439808445 | 7.08E-27    | 4.52E-26    |
| DNAJC6     | 3.658590569 | 1.395100298 | -1.390919128 | 1.18E-29    | 1.01E-28    |
| SNORA5C    | 0.569443038 | 2.315415503 | 2.02364767   | 2.73E-20    | 1.03E-19    |
| HIST1H2BF  | 0.087292578 | 0.700054641 | 3.003536632  | 4.53E-08    | 7.73E-08    |
| AC137834.2 | 0.010499838 | 0.46886002  | 5.48071834   | 1.70E-37    | 8.24E-36    |
| SHANK3     | 4.975534    | 12.22530062 | 1.296946664  | 1.31E-19    | 4.69E-19    |
| LILRA2     | 0.253274353 | 0.957236218 | 1.918173988  | 1.90E-28    | 1.42E-27    |
| DTX1       | 5.941631389 | 1.060120694 | -2.48663058  | 7.74E-36    | 2.10E-34    |
| ZFH2-AS1   | 0.067244723 | 0.255484777 | 1.925744366  | 4.35E-16    | 1.22E-15    |
| PLG        | 29.10647671 | 3.352723678 | -3.117934724 | 2.10E-18    | 6.90E-18    |
| AC009090.1 | 0.253848084 | 0.813872623 | 1.680837652  | 3.89E-14    | 9.65E-14    |
| MIR4477B   | 0.507853347 | 1.751291947 | 1.785935751  | 2.97E-19    | 1.03E-18    |
| FOXCUT     | 3.003648866 | 0.225931326 | -3.732759946 | 4.94E-40    | 7.29E-38    |
| AC011472.5 | 0.130876388 | 0.438008902 | 1.742755353  | 3.58E-10    | 6.93E-10    |
| MTCP1      | 0.330582161 | 3.209401257 | 3.279223393  | 1.25E-39    | 1.47E-37    |
| AP001094.1 | 0.299947793 | 0.66963881  | 1.158671729  | 3.12E-08    | 5.38E-08    |
| THOC6      | 6.824269972 | 14.37514652 | 1.074830034  | 2.26E-32    | 2.87E-31    |
| HMGCS2     | 108.9225706 | 17.51671484 | -2.6364988   | 2.58E-31    | 2.74E-30    |
| LINC01252  | 0.097695051 | 0.25132915  | 1.363220616  | 6.12E-08    | 1.03E-07    |
| SNORD7     | 0.223123361 | 0.73174902  | 1.713507336  | 1.37E-08    | 2.42E-08    |
| AL034399.2 | 0.010136973 | 0.898284903 | 6.469474247  | 5.25E-35    | 1.15E-33    |
| BTN2A2     | 1.998506625 | 4.647615228 | 1.217568279  | 6.42E-30    | 5.66E-29    |
| RPL9P7     | 0.327324488 | 0.732398103 | 1.161906516  | 2.88E-15    | 7.68E-15    |
| TRBV15     | 0.047038241 | 0.521969299 | 3.472058939  | 3.47E-18    | 1.12E-17    |
| CDH13      | 3.096009276 | 9.338292442 | 1.592748975  | 1.73E-21    | 7.13E-21    |
| SCRN1      | 29.37056186 | 14.17747243 | -1.050770514 | 7.20E-23    | 3.29E-22    |
| AL590764.1 | 0.153930179 | 0.753471698 | 2.291277215  | 3.26E-31    | 3.42E-30    |
| AC026368.1 | 0.106269404 | 0.230563843 | 1.117439996  | 0.000541861 | 0.000709433 |
| AC008267.3 | 0.293571544 | 0.947909182 | 1.691036707  | 2.29E-17    | 7.00E-17    |
| NME8       | 0.041484689 | 0.295523026 | 2.832619658  | 1.01E-34    | 2.05E-33    |
| IGSF21     | 0.346311228 | 1.041709338 | 1.588811719  | 2.06E-20    | 7.81E-20    |
| TRBV21-1   | 0.02927303  | 0.257227868 | 3.135402971  | 9.27E-13    | 2.11E-12    |
| RPL12P12   | 0.220631822 | 0.477125509 | 1.112727933  | 4.95E-17    | 1.48E-16    |
| WNK4       | 19.53498876 | 1.153112157 | -4.082455678 | 1.26E-40    | 2.53E-38    |
| C14orf132  | 3.878621611 | 1.421125187 | -1.448510389 | 6.14E-24    | 3.06E-23    |
| AL022328.1 | 0.488094669 | 1.278296115 | 1.388989173  | 3.64E-15    | 9.64E-15    |
| ZNF276     | 1.012265892 | 2.546885825 | 1.331145994  | 3.04E-24    | 1.55E-23    |
| HPSE2      | 0.909455705 | 0.169838211 | -2.420842295 | 3.26E-26    | 1.98E-25    |
| AC115618.3 | 4.138494569 | 10.00917151 | 1.274144593  | 3.16E-34    | 5.74E-33    |
| PLOD3      | 8.622099708 | 22.42286348 | 1.378859376  | 2.37E-37    | 1.10E-35    |
| PAQR6      | 0.238329471 | 1.478289197 | 2.632899262  | 4.06E-22    | 1.76E-21    |
| AC116351.1 | 0.526054251 | 1.512762039 | 1.523901571  | 0.000264044 | 0.000353226 |
| AC100778.2 | 0.152945383 | 0.423324776 | 1.468748375  | 1.10E-10    | 2.19E-10    |
| AP002812.1 | 0.076203802 | 0.397663656 | 2.383613828  | 2.56E-18    | 8.35E-18    |
| SRSF9P1    | 0.130479737 | 0.380115444 | 1.542611862  | 1.66E-19    | 5.93E-19    |
| MIR186     | 1.394609789 | 3.311316781 | 1.247543521  | 4.40E-07    | 7.05E-07    |
| IL21R      | 0.180143879 | 1.136034379 | 2.656784954  | 2.61E-32    | 3.28E-31    |
| CCDC154    | 0.074344323 | 0.372737856 | 2.325866862  | 1.93E-12    | 4.31E-12    |
| MT1F       | 47.98363982 | 10.68370914 | -2.167129993 | 4.46E-20    | 1.66E-19    |
| PKD2L1     | 0.03692825  | 0.350477956 | 3.246526889  | 2.87E-26    | 1.75E-25    |
| AC024580.1 | 0.271210764 | 0.601097275 | 1.14818404   | 3.57E-11    | 7.36E-11    |

Table S1. The differentially expressed genes(DEGs) were screened out in TCGA

| ID          | conMean     | treatMean   | logFC        | pValue      | FDR         |
|-------------|-------------|-------------|--------------|-------------|-------------|
| ZHX1-C8orf7 | 0.183201485 | 0.376193149 | 1.038042378  | 4.09E-22    | 1.77E-21    |
| AP001793.1  | 0.144976211 | 0.344154296 | 1.247239326  | 8.56E-11    | 1.72E-10    |
| IGLV5-37    | 0.266608137 | 0.842445289 | 1.659862183  | 0.004241025 | 0.00520223  |
| DCXR        | 64.1071605  | 14.67242986 | -2.127377698 | 6.79E-33    | 9.49E-32    |
| AL731571.1  | 0.207636123 | 0.638208813 | 1.619971076  | 1.56E-21    | 6.45E-21    |
| CHKB-CPT1E  | 0.072762262 | 0.246321006 | 1.759277361  | 1.73E-11    | 3.65E-11    |
| AC079466.1  | 0.079746909 | 6.708832791 | 6.394489381  | 1.30E-25    | 7.49E-25    |
| PCCB        | 12.71099814 | 3.964180799 | -1.680982655 | 7.18E-37    | 2.77E-35    |
| C22orf34    | 0.182433978 | 0.616539348 | 1.756818517  | 3.48E-27    | 2.29E-26    |
| MOGAT3      | 0.397957991 | 1.956139507 | 2.297321212  | 1.01E-11    | 2.16E-11    |
| WNT7B       | 3.936383163 | 0.245372546 | -4.003824914 | 6.86E-27    | 4.39E-26    |
| SNORD17     | 1.085952229 | 72.1082438  | 6.05313166   | 1.56E-09    | 2.92E-09    |
| AC018868.1  | 0.194105699 | 0.463105292 | 1.254497769  | 1.12E-14    | 2.87E-14    |
| PLAC8L1     | 0.085234942 | 0.547450151 | 2.683210717  | 2.32E-28    | 1.71E-27    |
| TMSB4Y      | 1.793387248 | 0.580927978 | -1.626255825 | 3.33E-10    | 6.46E-10    |
| RNU6-945P   | 0.183928468 | 0.422648164 | 1.200312387  | 9.83E-07    | 1.54E-06    |
| REG1B       | 0.037606154 | 0.94952685  | 4.658168127  | 2.35E-10    | 4.60E-10    |
| TRAV25      | 0.071733493 | 0.478806804 | 2.738724876  | 1.34E-16    | 3.89E-16    |
| EHBPI1      | 3.579166972 | 9.832540615 | 1.457940392  | 7.60E-31    | 7.57E-30    |
| AC025171.3  | 0.089514831 | 0.295542209 | 1.723165548  | 1.28E-18    | 4.26E-18    |
| SLC29A2     | 7.048646268 | 1.796930508 | -1.971811589 | 1.01E-32    | 1.37E-31    |
| AC005306.1  | 0.060826949 | 0.360572816 | 2.567508089  | 2.68E-18    | 8.72E-18    |
| AGT         | 23.32483383 | 50.60252513 | 1.117342576  | 9.34E-09    | 1.66E-08    |
| AC092118.2  | 0.199200985 | 0.560169679 | 1.491639116  | 1.05E-09    | 1.97E-09    |
| AC087045.3  | 4.052397141 | 0.087205346 | -5.538215175 | 1.77E-41    | 5.35E-39    |
| BTBD19      | 0.959842457 | 3.711220214 | 1.951024075  | 6.71E-29    | 5.27E-28    |
| MIR4435-2HC | 1.056913754 | 4.043424605 | 1.935720055  | 5.52E-37    | 2.23E-35    |
| CALCRL      | 10.04338083 | 20.5130162  | 1.030294643  | 7.70E-12    | 1.66E-11    |
| SLCO4A1-AS  | 0.119330044 | 0.501380484 | 2.070948521  | 4.42E-05    | 6.23E-05    |
| PLCG1-AS1   | 0.094879833 | 0.335665901 | 1.822852613  | 2.19E-22    | 9.66E-22    |
| CADPS2      | 17.98879646 | 6.013922565 | -1.580720469 | 1.01E-38    | 7.54E-37    |
| LINCR-0001  | 0.137810995 | 0.504949755 | 1.873448843  | 1.54E-15    | 4.19E-15    |
| ALOX15B     | 0.078100228 | 1.511289479 | 4.274309451  | 2.52E-34    | 4.64E-33    |
| LINC00174   | 0.635956639 | 1.856050674 | 1.545235792  | 1.25E-17    | 3.88E-17    |
| CLEC1A      | 1.267956868 | 3.094716956 | 1.287301796  | 3.39E-21    | 1.37E-20    |
| SLC16A6     | 0.550368194 | 2.03508022  | 1.886616661  | 1.75E-22    | 7.74E-22    |
| DOC2A       | 0.077140151 | 5.516229564 | 6.160056725  | 1.25E-37    | 6.32E-36    |
| AC012254.1  | 0.094205753 | 0.304175832 | 1.69101846   | 1.23E-07    | 2.04E-07    |
| GPX3        | 2285.433584 | 774.8427263 | -1.56049248  | 5.82E-05    | 8.13E-05    |
| AC007406.2  | 2.072276318 | 8.050849708 | 1.957924672  | 4.38E-18    | 1.41E-17    |
| AL354989.1  | 0.067013994 | 0.218914904 | 1.707835875  | 2.68E-11    | 5.57E-11    |
| LINC00941   | 0.083075172 | 0.27625519  | 1.733512294  | 0.000566667 | 0.000740639 |
| SRD5A3-AS1  | 0.097738523 | 0.246246003 | 1.333101104  | 7.86E-30    | 6.83E-29    |
| NEBL        | 13.3968191  | 4.789705375 | -1.483881671 | 5.81E-32    | 6.87E-31    |
| COL18A1-AS  | 0.056908514 | 0.366294149 | 2.686286246  | 0.000231323 | 0.000310664 |
| LINC01426   | 0.747948715 | 4.168572739 | 2.478542252  | 7.71E-19    | 2.61E-18    |
| MS4A4A      | 2.608754557 | 10.09454606 | 1.952142915  | 8.38E-27    | 5.32E-26    |
| AC027607.1  | 0.160421123 | 0.489209562 | 1.608588486  | 5.02E-19    | 1.72E-18    |
| AC010531.3  | 0.102831911 | 0.260090783 | 1.338727238  | 2.07E-07    | 3.39E-07    |
| AC092667.1  | 0.042215338 | 0.264775802 | 2.648932107  | 7.30E-22    | 3.10E-21    |
| RPLP1P6     | 1.121982719 | 2.382621246 | 1.086499175  | 2.38E-19    | 8.37E-19    |
| CCR1        | 2.950080943 | 6.545957196 | 1.14984963   | 1.20E-11    | 2.55E-11    |
| AC078820.1  | 0.086721327 | 0.226312053 | 1.38385468   | 0.021260062 | 0.024720556 |
| AL136084.3  | 0.483262762 | 1.155168865 | 1.257224026  | 3.97E-08    | 6.80E-08    |
| RIN3        | 1.736247782 | 4.692865695 | 1.434496321  | 9.64E-33    | 1.31E-31    |

Table S1. The differentially expressed genes(DEGs) were screened out in TCGA

| ID         | conMean     | treatMean   | logFC        | pValue      | FDR         |
|------------|-------------|-------------|--------------|-------------|-------------|
| AC025627.2 | 0.115567273 | 0.27567049  | 1.25421193   | 6.32E-05    | 8.81E-05    |
| IFI44      | 5.393094931 | 16.26535588 | 1.592617055  | 5.90E-29    | 4.66E-28    |
| PRTG       | 0.597444692 | 0.151856139 | -1.976099934 | 3.70E-35    | 8.35E-34    |
| TMEM178A   | 11.01851029 | 1.18546425  | -3.216405123 | 7.12E-40    | 9.39E-38    |
| PTH1R      | 73.50216802 | 8.079874382 | -3.185382036 | 3.31E-25    | 1.83E-24    |
| TNFRSF13C  | 0.141724726 | 0.325606696 | 1.200038895  | 2.02E-08    | 3.52E-08    |
| AC022167.2 | 0.26350701  | 0.659988537 | 1.324599626  | 3.27E-26    | 1.98E-25    |
| AC091887.1 | 0.039846947 | 0.239376263 | 2.586739002  | 5.46E-23    | 2.52E-22    |
| TRAV36DV7  | 0.061838876 | 0.289964705 | 2.22929131   | 2.69E-16    | 7.67E-16    |
| PKD1P6     | 0.2754947   | 0.752809118 | 1.450259537  | 9.86E-21    | 3.83E-20    |
| SLC25A27   | 1.089425683 | 2.35259271  | 1.110683793  | 0.000760576 | 0.000985508 |
| S1PR4      | 0.727896708 | 2.586876839 | 1.829405723  | 2.23E-29    | 1.85E-28    |
| HCAR1      | 1.33583617  | 0.413246465 | -1.692668698 | 5.60E-31    | 5.66E-30    |
| PSAT1      | 44.95856672 | 7.969221281 | -2.496085381 | 4.15E-24    | 2.09E-23    |
| MGAT3      | 2.258322908 | 5.634608378 | 1.319063556  | 8.92E-09    | 1.59E-08    |
| PROM1      | 24.19362538 | 10.57581297 | -1.193858403 | 1.63E-19    | 5.82E-19    |
| WDFY4      | 0.376538008 | 1.32030667  | 1.810005663  | 8.41E-23    | 3.82E-22    |
| AC020951.1 | 0.107455066 | 0.233379902 | 1.11894682   | 0.006962952 | 0.008409703 |
| CPNE6      | 1.886353055 | 0.022183501 | -6.409968829 | 2.26E-15    | 6.06E-15    |
| CAMTA1-DT  | 1.149879181 | 0.364071883 | -1.659187053 | 1.48E-26    | 9.21E-26    |
| MRPS6      | 34.24203228 | 10.80997837 | -1.663404692 | 5.23E-21    | 2.08E-20    |
| OGFR       | 6.041739389 | 12.50979341 | 1.050022105  | 1.29E-33    | 2.06E-32    |
| TRBV27     | 0.081946518 | 0.658507945 | 3.006446299  | 6.31E-17    | 1.87E-16    |
| IGLV3-16   | 0.238380436 | 3.446111105 | 3.853631475  | 0.000351268 | 0.000465644 |
| AL359880.1 | 0.070448354 | 0.241110444 | 1.775056241  | 6.25E-06    | 9.31E-06    |
| AC079760.2 | 0.11451777  | 4.718793375 | 5.364774613  | 4.96E-35    | 1.09E-33    |
| AC068299.1 | 0.013518085 | 0.316513021 | 4.549302177  | 5.32E-33    | 7.60E-32    |
| NOL3       | 3.572675417 | 38.74501045 | 3.43893378   | 9.81E-40    | 1.24E-37    |
| MCEMP1     | 0.074701727 | 0.334087127 | 2.161010899  | 1.16E-17    | 3.61E-17    |
| CCDC17     | 0.160879947 | 0.388786141 | 1.272992277  | 2.62E-07    | 4.26E-07    |
| RPS26P8    | 0.119268952 | 0.286712543 | 1.265386488  | 0.000714109 | 0.000926875 |
| AC127502.2 | 0.607823922 | 2.179395073 | 1.842202385  | 6.78E-26    | 3.99E-25    |
| RPL29P24   | 0.099923503 | 0.293993226 | 1.556886963  | 9.65E-13    | 2.20E-12    |
| B3GNTL1    | 0.288435572 | 0.731718047 | 1.343038742  | 3.72E-32    | 4.51E-31    |
| CR936218.1 | 0.259280711 | 1.093931576 | 2.076935713  | 9.57E-22    | 4.02E-21    |
| NPY1R      | 15.03992332 | 6.678034831 | -1.171301688 | 5.71E-24    | 2.86E-23    |
| RUFY4      | 0.008875577 | 0.282116978 | 4.990308735  | 8.92E-35    | 1.83E-33    |
| CCDC88A    | 1.66092669  | 3.352990926 | 1.013460182  | 1.78E-24    | 9.28E-24    |
| AL109936.2 | 0.824016286 | 1.775648282 | 1.107601086  | 5.19E-12    | 1.13E-11    |
| ADAMTS16   | 3.34860144  | 0.546467058 | -2.615352236 | 9.12E-31    | 8.97E-30    |
| PTCH2      | 0.181356082 | 0.512816451 | 1.499617412  | 1.87E-20    | 7.15E-20    |
| AL008723.1 | 0.090383249 | 0.279535169 | 1.628902485  | 0.001781734 | 0.002248243 |
| FHL1       | 17.83232988 | 57.64560407 | 1.692715385  | 4.44E-20    | 1.65E-19    |
| RASL11A    | 22.55621031 | 10.6515464  | -1.082461803 | 1.83E-26    | 1.13E-25    |
| AC010883.1 | 0.578507076 | 1.50989883  | 1.384045374  | 1.65E-12    | 3.71E-12    |
| FERMT1     | 1.645701214 | 0.68215302  | -1.270535125 | 1.38E-13    | 3.30E-13    |
| TRAJ3      | 0.056552988 | 0.553283985 | 3.290345022  | 2.17E-09    | 4.02E-09    |
| IGF2BP3    | 0.04052223  | 0.327299929 | 3.013827801  | 3.38E-17    | 1.02E-16    |
| SAA4       | 0.030838515 | 0.655397765 | 4.409565532  | 8.03E-06    | 1.19E-05    |
| AC022306.2 | 1.085303486 | 2.254416747 | 1.054655711  | 4.18E-20    | 1.55E-19    |
| ISG20      | 0.41655104  | 2.125562903 | 2.351279771  | 2.86E-36    | 8.70E-35    |
| AC093424.1 | 0.109950796 | 0.305131446 | 1.472572818  | 1.39E-08    | 2.45E-08    |
| B4GALNT2   | 6.037468302 | 0.450305995 | -3.74496612  | 3.08E-34    | 5.58E-33    |
| ITGAX      | 0.539689098 | 5.246232732 | 3.281081361  | 2.83E-38    | 1.84E-36    |
| ERICH4     | 5.257066422 | 0.457508877 | -3.522386322 | 6.41E-16    | 1.79E-15    |

Table S1. The differentially expressed genes(DEGs) were screened out in TCGA

| ID         | conMean     | treatMean   | logFC        | pValue      | FDR         |
|------------|-------------|-------------|--------------|-------------|-------------|
| MIR17HG    | 0.08218488  | 0.229677489 | 1.482664555  | 0.000565182 | 0.000738745 |
| PDE6B      | 1.590094147 | 3.186809617 | 1.003000646  | 3.49E-13    | 8.16E-13    |
| RAB33A     | 0.35543965  | 1.55095771  | 2.125482818  | 4.83E-28    | 3.44E-27    |
| IGKJ5      | 0.511897653 | 4.008572135 | 2.96916114   | 1.19E-06    | 1.85E-06    |
| SLC13A1    | 19.274907   | 8.515903804 | -1.178492341 | 5.28E-07    | 8.42E-07    |
| AC009119.3 | 0.062631439 | 0.314896319 | 2.329917963  | 1.53E-16    | 4.42E-16    |
| IGHJ3      | 1.827186476 | 10.7568777  | 2.557563597  | 1.56E-06    | 2.42E-06    |
| AC103706.1 | 0.269835801 | 0.755660515 | 1.485656467  | 7.65E-18    | 2.41E-17    |
| MUC3A      | 0.199117942 | 2.076072848 | 3.382161936  | 3.45E-32    | 4.22E-31    |
| DGKZP1     | 0.179193184 | 0.358648188 | 1.001053582  | 8.29E-23    | 3.77E-22    |
| AC004148.2 | 0.510152588 | 1.863830991 | 1.869270313  | 1.47E-17    | 4.56E-17    |
| DGCR5      | 0.418540462 | 11.01395087 | 4.717821168  | 2.97E-36    | 8.96E-35    |
| AC012615.6 | 0.180508467 | 0.822616013 | 2.188152643  | 7.62E-23    | 3.47E-22    |
| MZT2A      | 3.393943589 | 9.956934727 | 1.552739087  | 2.35E-30    | 2.19E-29    |
| AC022210.1 | 0.148512025 | 0.366649645 | 1.30382239   | 1.74E-18    | 5.73E-18    |
| AL513327.1 | 0.253826551 | 1.05298526  | 2.052570348  | 1.35E-24    | 7.11E-24    |
| RNA5SP425  | 0.036669985 | 0.333501968 | 3.185023684  | 1.12E-10    | 2.24E-10    |
| CCNA2      | 0.615271843 | 2.401520603 | 1.964652309  | 3.98E-35    | 8.89E-34    |
| TFAP2C     | 1.775898371 | 0.379051297 | -2.228084016 | 2.65E-24    | 1.36E-23    |
| CREB5      | 1.370992689 | 3.91888113  | 1.515220935  | 6.59E-25    | 3.56E-24    |
| MIR503HG   | 1.62844239  | 3.264438536 | 1.003342196  | 0.004237092 | 0.005197714 |
| PPARA      | 8.637702278 | 4.296827626 | -1.007375689 | 5.64E-25    | 3.07E-24    |
| GRID1      | 0.243957778 | 0.673372682 | 1.464773714  | 5.80E-12    | 1.26E-11    |
| MEX3B      | 0.32677398  | 0.741375235 | 1.181910815  | 2.04E-16    | 5.87E-16    |
| AC006023.2 | 0.075974745 | 0.253109062 | 1.736167334  | 0.000407948 | 0.000538421 |
| PLEK       | 2.499327369 | 12.07705911 | 2.272657399  | 3.13E-30    | 2.87E-29    |
| MIR4489    | 0.277436693 | 0.957139095 | 1.786569991  | 3.83E-10    | 7.41E-10    |
| TCIRG1     | 4.765599194 | 13.28861379 | 1.479461092  | 1.02E-30    | 1.00E-29    |
| LRRC14B    | 0.076099054 | 0.822630841 | 3.43429473   | 2.12E-06    | 3.26E-06    |
| GRIK1      | 0.047772063 | 0.238876709 | 2.32202711   | 3.68E-05    | 5.20E-05    |
| AL669983.1 | 0.06099654  | 0.342146574 | 2.487815199  | 1.99E-10    | 3.92E-10    |
| SCN9A      | 0.645444863 | 1.735984281 | 1.427388122  | 3.48E-09    | 6.36E-09    |
| AL356740.1 | 0.896657788 | 0.167994777 | -2.416141103 | 3.00E-36    | 9.05E-35    |
| AC108676.1 | 0.076567014 | 0.409667281 | 2.419657777  | 7.04E-28    | 4.93E-27    |
| AC080023.1 | 0.246310941 | 0.527745956 | 1.099362907  | 5.01E-13    | 1.16E-12    |
| AC079610.2 | 0.729658632 | 0.309381111 | -1.237836544 | 2.74E-19    | 9.59E-19    |
| CACNA2D4   | 0.299653483 | 0.982678717 | 1.713424666  | 4.87E-29    | 3.89E-28    |
| OVOL2      | 1.245520458 | 0.1128671   | -3.464051803 | 1.27E-38    | 9.33E-37    |
| PSTPIP2    | 1.109967185 | 2.430500159 | 1.130736204  | 3.32E-20    | 1.24E-19    |
| GCDH       | 8.152330028 | 3.993787816 | -1.02945477  | 1.44E-26    | 9.01E-26    |
| GZMK       | 1.119425467 | 11.76101515 | 3.393182213  | 3.73E-27    | 2.44E-26    |
| AC009961.2 | 0.012566478 | 0.321483385 | 4.677091902  | 1.41E-10    | 2.80E-10    |
| AP000892.2 | 0.140978721 | 0.285750376 | 1.019277977  | 3.60E-05    | 5.09E-05    |
| ANKRD53    | 0.331531142 | 0.663520321 | 1.000996257  | 1.15E-11    | 2.46E-11    |
| PPP1R13L   | 3.480957736 | 10.55501862 | 1.600372921  | 6.26E-30    | 5.53E-29    |
| AFG3L1P    | 0.546364406 | 1.148194493 | 1.071431638  | 5.51E-12    | 1.20E-11    |
| AC004846.1 | 0.693133468 | 0.314771852 | -1.138826644 | 1.40E-29    | 1.19E-28    |
| SAXO2      | 0.412849423 | 0.202788733 | -1.025638191 | 1.25E-19    | 4.49E-19    |
| BTN3A2     | 4.651531708 | 18.77493027 | 2.013029783  | 2.74E-35    | 6.40E-34    |
| RNY4P25    | 0.114837461 | 0.525508829 | 2.194121662  | 7.41E-05    | 0.000102826 |
| AC006378.2 | 0.064806349 | 0.224302831 | 1.791240758  | 3.92E-17    | 1.18E-16    |
| AEN        | 2.457039503 | 6.439466189 | 1.390020046  | 2.01E-36    | 6.48E-35    |
| CDH24      | 1.021140424 | 2.213403899 | 1.116085462  | 6.80E-23    | 3.12E-22    |
| CDKN2C     | 2.615416444 | 7.829170889 | 1.581818853  | 1.87E-32    | 2.42E-31    |
| RNF212B    | 2.278186778 | 0.136962508 | -4.0560331   | 7.85E-31    | 7.80E-30    |

Table S1. The differentially expressed genes(DEGs) were screened out in TCGA

| ID         | conMean     | treatMean   | logFC        | pValue      | FDR         |
|------------|-------------|-------------|--------------|-------------|-------------|
| IGLV5-48   | 0.112185317 | 0.493044874 | 2.13583509   | 0.004539569 | 0.005554868 |
| COL23A1    | 2.064496081 | 61.90506148 | 4.906195787  | 1.04E-34    | 2.10E-33    |
| AICDA      | 0.012507122 | 0.376703428 | 4.912607391  | 8.82E-35    | 1.81E-33    |
| CD36       | 3.561980571 | 16.4489814  | 2.207246696  | 2.55E-23    | 1.21E-22    |
| MPP2       | 1.067437387 | 0.274902997 | -1.957156906 | 2.54E-32    | 3.21E-31    |
| CLEC18A    | 0.509953973 | 2.317215841 | 2.183953488  | 3.99E-14    | 9.88E-14    |
| FOXC2-AS1  | 0.099378763 | 0.724179465 | 2.865337772  | 9.22E-13    | 2.10E-12    |
| OSCAR      | 0.427156025 | 2.537181639 | 2.570391769  | 5.36E-36    | 1.52E-34    |
| RNU2-11P   | 0.159922159 | 1.404027851 | 3.134129794  | 4.15E-21    | 1.66E-20    |
| DCSTAMP    | 0.029995388 | 0.265781414 | 3.147427614  | 6.69E-28    | 4.70E-27    |
| AC133065.3 | 0.952575899 | 2.643840798 | 1.472729354  | 5.89E-17    | 1.75E-16    |
| EIF4EBP1   | 9.736554972 | 41.00997178 | 2.074491443  | 5.29E-34    | 9.15E-33    |
| TBX21      | 0.179919735 | 1.026242273 | 2.511946014  | 2.06E-34    | 3.88E-33    |
| OLFML2B    | 3.230107157 | 20.55591299 | 2.669899519  | 8.24E-34    | 1.38E-32    |
| AC087222.1 | 0.103054198 | 0.659191437 | 2.677294231  | 1.79E-21    | 7.40E-21    |
| CENPT      | 2.265614597 | 5.171412889 | 1.190656029  | 1.22E-24    | 6.45E-24    |
| PCSK6      | 0.974560968 | 7.786660459 | 2.99818037   | 2.09E-28    | 1.55E-27    |
| RFC2       | 5.968517278 | 12.75512434 | 1.095632481  | 1.53E-37    | 7.51E-36    |
| SNORD9     | 0.107317568 | 0.847625966 | 2.981541516  | 0.000136872 | 0.000186617 |
| CRIP1      | 0.368523833 | 1.357788786 | 1.881429245  | 7.15E-25    | 3.85E-24    |
| RTEL1      | 0.120362321 | 0.274666435 | 1.190296786  | 1.19E-22    | 5.34E-22    |
| AC068790.2 | 0.1267637   | 0.46818075  | 1.884923939  | 1.51E-18    | 5.01E-18    |
| AL132712.2 | 0.408532998 | 1.083164251 | 1.406727514  | 4.95E-09    | 8.95E-09    |
| AC108134.3 | 0.476816533 | 1.23918014  | 1.377879762  | 4.65E-11    | 9.50E-11    |
| LINC00900  | 0.10549299  | 0.414216534 | 1.973238009  | 2.36E-25    | 1.33E-24    |
| UST        | 3.268293092 | 1.337158139 | -1.289367271 | 1.15E-28    | 8.81E-28    |
| CRYBB1     | 0.252800557 | 0.704587479 | 1.478779195  | 3.86E-23    | 1.80E-22    |
| GNAI1      | 23.59326063 | 10.08993414 | -1.225458057 | 1.09E-25    | 6.33E-25    |
| RPL22P19   | 0.024782544 | 0.30236259  | 3.608883429  | 1.79E-22    | 7.91E-22    |
| AC010336.2 | 0.754044821 | 0.249261096 | -1.596992551 | 1.16E-10    | 2.32E-10    |
| IGHV3-11   | 5.841501167 | 21.9016924  | 1.906631285  | 7.33E-05    | 0.000101761 |
| IGKV2D-40  | 0.591343743 | 2.611844381 | 2.143000037  | 0.009066488 | 0.010856163 |
| AC120036.3 | 0.814874019 | 0.372008639 | -1.13124091  | 1.27E-20    | 4.89E-20    |
| RNU6-892P  | 0.166769624 | 0.569524875 | 1.771902325  | 2.53E-07    | 4.12E-07    |
| TACR1      | 0.832519025 | 0.314857087 | -1.402786099 | 2.86E-23    | 1.35E-22    |
| NIM1K      | 0.164269292 | 0.476549306 | 1.536562677  | 4.31E-11    | 8.82E-11    |
| PRR7       | 0.341700545 | 1.745356908 | 2.352717628  | 1.51E-30    | 1.44E-29    |
| AL035404.2 | 0.034081686 | 0.261890205 | 2.941893497  | 2.94E-11    | 6.10E-11    |
| AC005899.6 | 0.329949503 | 1.153752238 | 1.806016296  | 2.64E-15    | 7.07E-15    |
| RNU6-1136P | 0.183656647 | 0.560314547 | 1.609225833  | 1.18E-11    | 2.52E-11    |
| AC244197.2 | 0.120918853 | 0.664160648 | 2.45749305   | 1.09E-12    | 2.47E-12    |
| SEM1P1     | 1.400167967 | 0.131233199 | -3.415395268 | 1.98E-05    | 2.85E-05    |
| RERGL      | 5.761676472 | 1.992618295 | -1.531823279 | 5.36E-25    | 2.92E-24    |
| CNTD2      | 3.80168081  | 0.137763559 | -4.786371182 | 8.87E-27    | 5.62E-26    |
| AP006621.2 | 0.441335212 | 1.854161364 | 2.070820041  | 3.74E-14    | 9.28E-14    |
| SLC25A10   | 9.414016619 | 4.596092748 | -1.034402488 | 9.34E-09    | 1.66E-08    |
| SLPI       | 166.7490311 | 48.27262438 | -1.788401211 | 1.44E-18    | 4.78E-18    |
| LIN37      | 0.663995044 | 1.335982335 | 1.008656553  | 4.18E-34    | 7.41E-33    |
| AC141557.1 | 0.212571125 | 0.972681117 | 2.194021273  | 9.27E-17    | 2.72E-16    |
| AL139351.1 | 0.088745039 | 0.63526481  | 2.839619728  | 1.69E-18    | 5.58E-18    |
| C6orf52    | 1.326797647 | 0.374138231 | -1.82630506  | 9.09E-37    | 3.40E-35    |
| AL162724.2 | 0.207476886 | 1.892004637 | 3.188893097  | 9.77E-34    | 1.60E-32    |
| TYRP1      | 5.27942938  | 0.141356967 | -5.222967112 | 1.50E-39    | 1.70E-37    |
| DPYSL3     | 6.055980132 | 13.39626318 | 1.145398247  | 2.11E-11    | 4.41E-11    |
| AL161937.2 | 0.056829079 | 0.354454687 | 2.640899957  | 7.05E-32    | 8.21E-31    |

Table S1. The differentially expressed genes(DEGs) were screened out in TCGA

| ID         | conMean     | treatMean   | logFC        | pValue      | FDR         |
|------------|-------------|-------------|--------------|-------------|-------------|
| PADI2      | 14.23608738 | 2.525784916 | -2.494748996 | 5.58E-29    | 4.42E-28    |
| IFITM4P    | 0.111226415 | 0.712468944 | 2.679327677  | 5.84E-26    | 3.46E-25    |
| FECH       | 25.27341774 | 6.544823334 | -1.949194619 | 3.09E-39    | 2.92E-37    |
| ADA        | 1.034734726 | 4.739863256 | 2.195584485  | 5.15E-34    | 8.92E-33    |
| SNX10      | 13.96596378 | 32.87792731 | 1.235204215  | 1.47E-25    | 8.39E-25    |
| ANO9       | 0.981751083 | 3.274819326 | 1.737986124  | 4.30E-10    | 8.29E-10    |
| AC005154.1 | 0.140944599 | 0.438417121 | 1.637175946  | 6.72E-09    | 1.21E-08    |
| RNU6-853P  | 0.162539635 | 0.392163182 | 1.270662536  | 0.00172991  | 0.0021862   |
| B4GALNT4   | 0.09727171  | 0.875462438 | 3.169953089  | 3.95E-07    | 6.35E-07    |
| AL365361.1 | 0.314556736 | 1.027701595 | 1.708029262  | 1.42E-20    | 5.48E-20    |
| SLC9A5     | 0.11545852  | 0.402574641 | 1.801881665  | 2.65E-27    | 1.76E-26    |
| GIMAP5     | 0.433065458 | 1.159739565 | 1.421143854  | 1.62E-19    | 5.78E-19    |
| CRYL1      | 133.7763104 | 64.89023218 | -1.043749428 | 9.96E-24    | 4.88E-23    |
| RN7SL49P   | 0.085435089 | 0.28497207  | 1.737919896  | 2.98E-08    | 5.15E-08    |
| AC087588.2 | 0.090828032 | 0.278339228 | 1.615634724  | 2.84E-06    | 4.32E-06    |
| AC004069.1 | 0.193290274 | 0.751973518 | 1.959912811  | 9.13E-26    | 5.32E-25    |
| RNA5SP195  | 0.085769956 | 0.29987931  | 1.805837699  | 5.96E-05    | 8.32E-05    |
| HMGB3P24   | 0.220103711 | 0.509998323 | 1.212309032  | 1.81E-14    | 4.59E-14    |
| PHYHD1     | 13.34341421 | 2.781405091 | -2.262242076 | 6.44E-37    | 2.51E-35    |
| ATP2C2     | 0.589952918 | 0.152278652 | -1.953886121 | 4.48E-34    | 7.89E-33    |
| NSG1       | 1.000402027 | 0.427832944 | -1.225460402 | 1.12E-05    | 1.64E-05    |
| ABHD14A    | 9.483436306 | 4.657996353 | -1.025700402 | 7.15E-29    | 5.59E-28    |
| AC087752.2 | 0.043375357 | 0.247698112 | 2.513635335  | 4.62E-15    | 1.22E-14    |
| AL590644.1 | 0.007711228 | 1.502525555 | 7.606213181  | 1.46E-36    | 5.03E-35    |
| VSIG4      | 5.905771228 | 18.19610974 | 1.623432663  | 1.08E-16    | 3.16E-16    |
| SHC1       | 17.57345944 | 37.06370639 | 1.076608936  | 1.14E-31    | 1.27E-30    |
| CRYM       | 8.631071331 | 3.93842758  | -1.131919897 | 5.64E-07    | 8.98E-07    |
| IGHG3      | 12.89760276 | 121.8557209 | 3.239999137  | 6.32E-08    | 1.07E-07    |
| CCDC150    | 0.32424327  | 0.760027399 | 1.228974796  | 1.84E-09    | 3.42E-09    |
| AP003110.1 | 0.669024443 | 0.187988877 | -1.831411622 | 4.45E-10    | 8.56E-10    |
| PER2       | 3.173807708 | 7.14373388  | 1.170463616  | 1.58E-22    | 7.05E-22    |
| AC084018.1 | 0.99577225  | 2.827534184 | 1.50565675   | 2.43E-09    | 4.49E-09    |
| AC079684.1 | 0.171040217 | 0.581492446 | 1.765424861  | 6.02E-17    | 1.79E-16    |
| ENPP7P7    | 0.300459119 | 0.927455427 | 1.62610924   | 9.86E-10    | 1.86E-09    |
| EPSTI1     | 2.863071139 | 6.304459988 | 1.138809283  | 1.30E-18    | 4.33E-18    |
| IGLV2-34   | 0.226060286 | 0.478530828 | 1.081904303  | 0.001673113 | 0.002117282 |
| MYO3B      | 5.068082386 | 0.368135252 | -3.783132167 | 1.94E-38    | 1.32E-36    |
| AC138932.5 | 0.194844928 | 0.569217787 | 1.546654366  | 1.64E-13    | 3.91E-13    |
| LAPTM4B    | 59.73287806 | 28.61708752 | -1.061648385 | 6.01E-30    | 5.32E-29    |
| NPM1P25    | 5.999087301 | 1.742020769 | -1.783981202 | 5.05E-35    | 1.11E-33    |
| AC006566.1 | 0.174338961 | 0.510535798 | 1.550117109  | 3.98E-16    | 1.12E-15    |
| UBA52P6    | 0.114347293 | 0.480916806 | 2.072365132  | 4.51E-29    | 3.61E-28    |
| NALT1      | 0.153686553 | 0.641720519 | 2.061954171  | 2.63E-12    | 5.83E-12    |
| AC025265.1 | 0.078608932 | 1.250925062 | 3.992158307  | 3.70E-34    | 6.63E-33    |
| AC073651.1 | 0.016418257 | 0.411436632 | 4.647297396  | 4.39E-05    | 6.17E-05    |
| AL133523.1 | 0.472838    | 0.215613069 | -1.132901358 | 1.69E-13    | 4.02E-13    |
| SCARNA10   | 0.214070386 | 20.62631466 | 6.590257033  | 0.01369097  | 0.016148364 |
| GSG1L2     | 0.004601747 | 7.758228835 | 10.71932983  | 9.38E-19    | 3.16E-18    |
| AC005332.5 | 0.789173261 | 1.897862519 | 1.265961507  | 5.79E-27    | 3.73E-26    |
| AC009084.2 | 0.040651844 | 2.242469683 | 5.785623888  | 1.35E-36    | 4.71E-35    |
| AC069120.1 | 1.115246096 | 0.178333828 | -2.6447098   | 3.72E-27    | 2.44E-26    |
| TIMM8AP1   | 0.252828591 | 0.593797339 | 1.231811007  | 0.000511519 | 0.000670603 |
| AL078459.1 | 0.081824285 | 0.282804933 | 1.789206287  | 1.31E-14    | 3.35E-14    |
| AC117503.4 | 0.127779634 | 0.402620444 | 1.655762513  | 3.97E-15    | 1.05E-14    |
| MIR3671    | 0.551157319 | 1.961680023 | 1.83155366   | 1.03E-08    | 1.82E-08    |

Table S1. The differentially expressed genes(DEGs) were screened out in TCGA

| ID         | conMean     | treatMean   | logFC        | pValue      | FDR         |
|------------|-------------|-------------|--------------|-------------|-------------|
| CDHR1      | 0.211467849 | 3.991554242 | 4.238440375  | 7.71E-19    | 2.61E-18    |
| AC004076.2 | 0.09897778  | 0.277680497 | 1.488249256  | 4.48E-21    | 1.79E-20    |
| NAT8L      | 11.04399282 | 0.394484636 | -4.807148933 | 1.42E-39    | 1.65E-37    |
| RNU6-890P  | 0.099586661 | 0.330989262 | 1.732759999  | 0.002508242 | 0.00312892  |
| PYCR1      | 1.066275435 | 3.393914528 | 1.670370077  | 2.67E-11    | 5.55E-11    |
| CYP2J2     | 1.437270426 | 52.21073534 | 5.182943038  | 1.17E-30    | 1.13E-29    |
| TRBJ2-2P   | 0.265883929 | 1.528393628 | 2.523147664  | 4.37E-19    | 1.51E-18    |
| AC032044.1 | 0.070081025 | 0.229369918 | 1.710580413  | 1.13E-12    | 2.55E-12    |
| MIR6728    | 0.049133807 | 0.5571913   | 3.503384803  | 1.34E-18    | 4.47E-18    |
| BTG1P1     | 0.058069398 | 0.228322871 | 1.975225389  | 3.35E-17    | 1.01E-16    |
| AC004890.3 | 0.049373396 | 0.258951777 | 2.390877674  | 2.34E-17    | 7.16E-17    |
| AC027020.2 | 0.394557798 | 0.836579964 | 1.08426679   | 6.32E-06    | 9.41E-06    |
| SAPCD1     | 0.072301114 | 0.596161888 | 3.043614375  | 2.29E-19    | 8.06E-19    |
| HNRNPH1P1  | 0.118700071 | 0.2641168   | 1.153855271  | 1.65E-06    | 2.54E-06    |
| C1orf226   | 5.661988175 | 0.800242463 | -2.822799647 | 3.90E-39    | 3.51E-37    |
| MARCKS     | 22.78024789 | 48.25415192 | 1.082869635  | 1.56E-26    | 9.69E-26    |
| RNU6-1157P | 0.152090689 | 0.636464629 | 2.065148508  | 2.24E-13    | 5.30E-13    |
| IGHV1-2    | 11.49579373 | 26.4907642  | 1.204383382  | 0.000434522 | 0.000572394 |
| LYPD3      | 1.201011788 | 0.480951579 | -1.320286751 | 2.31E-25    | 1.30E-24    |
| IL7        | 0.703906974 | 1.626606139 | 1.20840828   | 1.69E-24    | 8.84E-24    |
| DEFB131E   | 0.009131719 | 0.276969319 | 4.922695937  | 4.91E-35    | 1.09E-33    |
| DUSP26     | 1.479492803 | 0.232901021 | -2.667313809 | 2.26E-36    | 7.13E-35    |
| WASHC5-AS  | 0.111216664 | 0.285971626 | 1.362499038  | 2.05E-11    | 4.29E-11    |
| PM20D1     | 1.996239577 | 0.299158411 | -2.738303342 | 7.74E-12    | 1.66E-11    |
| PCDHGC3    | 2.834770899 | 6.221170971 | 1.133954011  | 1.20E-18    | 3.99E-18    |
| AL161935.1 | 0.041822578 | 0.285633522 | 2.771811422  | 2.26E-24    | 1.17E-23    |
| AC100826.1 | 0.100752212 | 0.44072568  | 2.129069449  | 1.89E-06    | 2.91E-06    |
| HLA-G      | 1.676810196 | 24.47187207 | 3.867333171  | 2.77E-32    | 3.44E-31    |
| TENM1      | 0.358796028 | 2.105451036 | 2.552893502  | 9.48E-27    | 6.00E-26    |
| ANXA4      | 21.65618764 | 78.2592556  | 1.853482095  | 1.87E-34    | 3.56E-33    |
| RIOX2      | 4.013628333 | 1.700767779 | -1.238720857 | 1.58E-35    | 3.93E-34    |
| ZNF793-AS1 | 1.437710857 | 0.651347356 | -1.142274534 | 9.76E-29    | 7.51E-28    |
| ALDOC      | 6.832748431 | 32.67437267 | 2.257621622  | 4.42E-25    | 2.42E-24    |
| DOCK4      | 2.353753925 | 4.745518742 | 1.011602299  | 3.51E-21    | 1.41E-20    |
| AC243964.2 | 2.639445889 | 0.727702807 | -1.858813809 | 7.81E-25    | 4.20E-24    |
| AP001160.4 | 0.155973569 | 0.542680096 | 1.798800421  | 1.73E-10    | 3.43E-10    |
| AC135050.3 | 0.160602104 | 1.482246647 | 3.206222835  | 1.68E-30    | 1.60E-29    |
| AC002401.1 | 4.430612702 | 0.86628547  | -2.354591795 | 2.17E-07    | 3.55E-07    |
| ARMC2-AS1  | 0.128187831 | 0.328476553 | 1.357531086  | 9.19E-06    | 1.36E-05    |
| SNORD89    | 0.673311726 | 4.50720654  | 2.742887066  | 4.78E-27    | 3.10E-26    |
| RNF138P1   | 0.088036688 | 0.434767778 | 2.304068252  | 3.91E-13    | 9.13E-13    |
| MIR126     | 0.357106199 | 2.802709243 | 2.972397003  | 2.10E-15    | 5.66E-15    |
| PARM1      | 31.90076421 | 14.97769543 | -1.090775328 | 6.51E-24    | 3.23E-23    |
| AL139407.1 | 0.181116747 | 0.489115411 | 1.433254974  | 1.01E-11    | 2.15E-11    |
| IGLV3-25   | 10.55332712 | 46.96425583 | 2.153865244  | 2.14E-07    | 3.49E-07    |
| AC006077.2 | 0.363484036 | 0.768493069 | 1.080140245  | 8.17E-06    | 1.21E-05    |
| AC122719.1 | 0.022557583 | 0.325929803 | 3.852876856  | 1.48E-16    | 4.30E-16    |
| PNMA3      | 0.854318747 | 2.389100988 | 1.483621492  | 0.007743492 | 0.009315357 |
| VCAN       | 7.009032463 | 25.42183894 | 1.858781183  | 6.47E-18    | 2.05E-17    |
| RNU4ATAC1  | 0.471305239 | 1.631738128 | 1.791675918  | 1.10E-13    | 2.65E-13    |
| IGHD       | 3.47977236  | 7.861654315 | 1.175839998  | 0.001315795 | 0.001678622 |
| AC009996.1 | 0.121245898 | 0.369511548 | 1.607683516  | 2.82E-10    | 5.51E-10    |
| TRAV35     | 0.067022355 | 0.318884614 | 2.250320207  | 3.01E-15    | 8.03E-15    |
| TDRD6      | 0.080143275 | 0.30214995  | 1.914611342  | 1.20E-24    | 6.36E-24    |
| SNHG15     | 1.780567522 | 5.903480523 | 1.729228631  | 3.30E-34    | 5.97E-33    |

Table S1. The differentially expressed genes(DEGs) were screened out in TCGA

| ID         | conMean     | treatMean   | logFC        | pValue   | FDR      |
|------------|-------------|-------------|--------------|----------|----------|
| HTR6       | 0.030121315 | 1.066320661 | 5.145712768  | 2.31E-30 | 2.16E-29 |
| CALML3     | 3.394824496 | 0.073922323 | -5.521183095 | 3.63E-16 | 1.03E-15 |
| MELTF-AS1  | 0.693801615 | 1.426135092 | 1.039515546  | 2.13E-07 | 3.48E-07 |
| AC091729.2 | 0.093200067 | 0.495761222 | 2.411242539  | 1.39E-08 | 2.45E-08 |
| CLIC5      | 22.71876015 | 1.727578613 | -3.717060837 | 3.10E-24 | 1.58E-23 |
| ADAMTS4    | 2.251445369 | 8.919761138 | 1.986153605  | 6.43E-23 | 2.95E-22 |
| KRT8P46    | 0.091718781 | 0.243367236 | 1.40784587   | 1.06E-18 | 3.55E-18 |
| DAG1       | 33.34842403 | 14.99587457 | -1.153052921 | 9.55E-38 | 5.12E-36 |
| IGHV3-20   | 0.342937209 | 1.811452692 | 2.401130777  | 9.87E-06 | 1.45E-05 |
| ANXA9      | 21.50598792 | 5.687017928 | -1.918994148 | 1.19E-40 | 2.42E-38 |
| MAP6       | 3.296785568 | 0.64103857  | -2.362576985 | 2.92E-40 | 4.66E-38 |
| ARHGAP45   | 2.681118772 | 7.69766429  | 1.521585622  | 1.41E-32 | 1.88E-31 |
| CD96       | 0.392553479 | 2.23494666  | 2.509279283  | 3.84E-30 | 3.49E-29 |
| AC004687.1 | 0.090107372 | 0.986754326 | 3.452973887  | 5.85E-29 | 4.63E-28 |
| AC069281.2 | 0.371931094 | 0.765229455 | 1.040857041  | 6.78E-09 | 1.22E-08 |
| AC148476.1 | 0.211363621 | 1.766309352 | 3.062939044  | 1.70E-20 | 6.50E-20 |
| IGKV1-8    | 0.532781266 | 2.333930189 | 2.131146148  | 5.49E-05 | 7.68E-05 |
| ANOS1      | 0.71460719  | 1.433146347 | 1.003963604  | 9.22E-15 | 2.38E-14 |
| LINC01638  | 0.060197012 | 1.138491507 | 4.241287833  | 7.30E-23 | 3.34E-22 |
| KDR        | 18.6239401  | 43.08507936 | 1.210030018  | 1.98E-12 | 4.42E-12 |
| TMEM191A   | 0.305177442 | 0.653621366 | 1.098806821  | 6.41E-24 | 3.19E-23 |
| CFAP221    | 2.431400757 | 0.908318767 | -1.420517112 | 3.90E-30 | 3.55E-29 |
| CCL5       | 5.452020633 | 51.86301717 | 3.249843211  | 5.05E-35 | 1.11E-33 |
| LDLR       | 6.403849768 | 2.576844187 | -1.313334158 | 9.73E-21 | 3.78E-20 |
| ZNF831     | 0.072928143 | 0.362103727 | 2.311855468  | 8.23E-25 | 4.41E-24 |
| ADRB1      | 0.785908845 | 0.294305843 | -1.417045805 | 6.18E-34 | 1.06E-32 |
| PSCA       | 2.625123626 | 0.990275588 | -1.406483385 | 1.35E-23 | 6.57E-23 |
| AC106047.1 | 0.69513783  | 0.284471958 | -1.289012613 | 8.43E-20 | 3.07E-19 |
| AKAP3      | 1.564919536 | 0.316153421 | -2.307391743 | 3.62E-39 | 3.30E-37 |
| ZBP1       | 0.070055515 | 0.526008935 | 2.908516772  | 1.37E-31 | 1.51E-30 |
| C2         | 1.981194317 | 8.994835323 | 2.182726481  | 2.57E-19 | 9.01E-19 |
| SNORA3B    | 0.100526771 | 0.603037111 | 2.58466703   | 4.94E-13 | 1.15E-12 |
| CHD3       | 20.54570439 | 10.24434228 | -1.004009431 | 3.07E-26 | 1.86E-25 |
| RHEBL1     | 0.216199959 | 0.831478964 | 1.943313517  | 3.65E-36 | 1.07E-34 |
| TRBV2      | 0.182627847 | 1.268133092 | 2.7957275    | 8.58E-22 | 3.62E-21 |
| AL355376.2 | 1.697040675 | 0.185066188 | -3.1969079   | 2.07E-13 | 4.91E-13 |
| SCCPDH     | 53.96174569 | 20.90225703 | -1.368278288 | 3.83E-21 | 1.54E-20 |
| LILRA1     | 0.314534836 | 0.921088995 | 1.550120743  | 2.00E-24 | 1.04E-23 |
| PPT2-EGFL8 | 0.098078938 | 0.231728214 | 1.240418443  | 5.99E-14 | 1.47E-13 |
| LINC01948  | 1.777017847 | 0.613197798 | -1.535033749 | 4.10E-26 | 2.46E-25 |
| CNGA1      | 3.16827715  | 0.5471117   | -2.533791229 | 4.37E-32 | 5.23E-31 |
| VAV1       | 0.70746699  | 3.586581249 | 2.341874574  | 5.87E-34 | 1.01E-32 |
| VEGFA      | 10.79031619 | 125.7155178 | 3.542353694  | 2.71E-37 | 1.23E-35 |
| TRAV41     | 0.09234061  | 0.563372793 | 2.609052729  | 2.93E-21 | 1.19E-20 |
| AC027271.1 | 0.160882491 | 0.402100897 | 1.32155023   | 1.41E-14 | 3.59E-14 |
| PTGDS      | 37.2462633  | 15.73044518 | -1.243536195 | 3.82E-14 | 9.48E-14 |
| FCGBP      | 6.326709439 | 2.775545239 | -1.188684132 | 1.67E-09 | 3.12E-09 |
| CAMK1D     | 1.475041436 | 3.637081591 | 1.302025808  | 1.62E-29 | 1.36E-28 |
| SLC17A2    | 0.179394519 | 1.838151896 | 3.35704827   | 1.19E-22 | 5.37E-22 |
| MIR548AR   | 0.137205813 | 0.379202972 | 1.46662867   | 2.99E-05 | 4.25E-05 |
| SORL1      | 18.35745235 | 8.767072029 | -1.066198849 | 1.01E-21 | 4.24E-21 |
| AGXT       | 3.632917127 | 0.822009876 | -2.143900824 | 1.16E-12 | 2.63E-12 |
| LINC00551  | 1.443060012 | 0.125846744 | -3.519391497 | 1.62E-36 | 5.42E-35 |
| APOC1      | 2.677430229 | 88.20676067 | 5.041968351  | 9.59E-41 | 2.16E-38 |
| CHODL      | 1.624665236 | 0.511380237 | -1.667674168 | 4.22E-27 | 2.75E-26 |



Table S1. The differentially expressed genes(DEGs) were screened out in TCGA

| ID         | conMean     | treatMean   | logFC        | pValue      | FDR         |
|------------|-------------|-------------|--------------|-------------|-------------|
| AZGP1      | 41.87893129 | 12.40667375 | -1.755108248 | 2.04E-06    | 3.13E-06    |
| AL353807.4 | 0.290060575 | 0.75605027  | 1.382127946  | 1.38E-07    | 2.28E-07    |
| RPS20P10   | 0.087128626 | 0.215382959 | 1.305685417  | 8.90E-07    | 1.40E-06    |
| FANCA      | 0.205336984 | 0.652863696 | 1.66878832   | 8.37E-28    | 5.82E-27    |
| ACADM      | 47.14106    | 17.04715657 | -1.467453078 | 2.02E-33    | 3.11E-32    |
| AP001178.2 | 0.101110398 | 0.493745211 | 2.287835391  | 4.20E-12    | 9.17E-12    |
| EPHA1      | 2.791812264 | 0.945351179 | -1.562279665 | 9.19E-35    | 1.88E-33    |
| ADRA1B     | 2.114406457 | 5.774293738 | 1.449391763  | 4.88E-23    | 2.26E-22    |
| RPS24P17   | 4.402992474 | 0.255194408 | -4.108815758 | 1.05E-27    | 7.22E-27    |
| BVES       | 1.552126725 | 0.636864777 | -1.285187364 | 2.43E-09    | 4.49E-09    |
| XRCC3      | 0.362753863 | 1.010706636 | 1.478301426  | 3.87E-25    | 2.13E-24    |
| HCG4P8     | 0.009524735 | 0.285907676 | 4.907726524  | 1.00E-26    | 6.33E-26    |
| DEPDC1     | 0.125705224 | 0.487340381 | 1.95488516   | 4.67E-32    | 5.57E-31    |
| TMEM56     | 4.093651819 | 1.829511066 | -1.161930259 | 3.26E-29    | 2.66E-28    |
| MISP       | 5.671915125 | 1.779461104 | -1.672395546 | 6.67E-28    | 4.69E-27    |
| AC009237.3 | 0.818004244 | 0.293099899 | -1.480715857 | 2.55E-18    | 8.33E-18    |
| ZNF667-AS1 | 6.669844874 | 2.486440702 | -1.423571182 | 4.46E-33    | 6.47E-32    |
| SULT1C2P1  | 0.255639436 | 0.563692343 | 1.140797558  | 0.002009453 | 0.002525833 |
| LINC02313  | 0.166041423 | 0.547806964 | 1.72212441   | 6.21E-13    | 1.43E-12    |
| AL391121.1 | 4.156416625 | 1.432769015 | -1.536534229 | 1.12E-35    | 2.89E-34    |
| GLRX5      | 21.86946911 | 10.06061614 | -1.120199537 | 4.82E-36    | 1.38E-34    |
| CDRT15P1   | 0.168703113 | 0.354445044 | 1.071075367  | 2.31E-08    | 4.02E-08    |
| AL606760.1 | 1.255715813 | 0.370449339 | -1.761161833 | 6.58E-39    | 5.27E-37    |
| ATP6V1G3   | 18.67342761 | 5.808373219 | -1.684780704 | 4.22E-44    | 2.63E-41    |
| AP000696.1 | 3.178654573 | 0.055359656 | -5.84343746  | 4.71E-42    | 1.98E-39    |
| NOVA2      | 0.873929133 | 1.992309239 | 1.188853392  | 7.06E-18    | 2.23E-17    |
| DLK2       | 0.198237225 | 1.013021194 | 2.353364553  | 8.73E-29    | 6.77E-28    |
| AC087762.1 | 1.789442771 | 0.256268173 | -2.803784182 | 3.66E-34    | 6.58E-33    |
| AC090510.2 | 0.083297584 | 0.438557994 | 2.396421075  | 5.35E-25    | 2.92E-24    |
| RN7SL838P  | 0.040962958 | 0.370421021 | 3.17677417   | 7.37E-08    | 1.24E-07    |
| AC126118.1 | 0.105057362 | 0.341438131 | 1.700446919  | 2.42E-11    | 5.04E-11    |
| IGKV1-33   | 0.068910751 | 0.536434485 | 2.960601003  | 0.00294533  | 0.003656002 |
| XCR1       | 0.212447169 | 0.545847427 | 1.361393634  | 1.55E-09    | 2.90E-09    |
| FRY        | 5.308358569 | 2.408725971 | -1.139995551 | 3.75E-28    | 2.72E-27    |
| RNF157-AS1 | 1.457353044 | 0.327546108 | -2.153580504 | 1.15E-30    | 1.11E-29    |
| MIR25      | 0.760879156 | 3.101571785 | 2.027260271  | 2.47E-17    | 7.56E-17    |
| RPL36A     | 7.488435861 | 17.41447553 | 1.21755071   | 1.26E-33    | 2.01E-32    |
| PRELP      | 16.86733319 | 8.212714025 | -1.038300927 | 1.21E-13    | 2.91E-13    |
| FIBCD1     | 0.045066528 | 0.926502771 | 4.361667066  | 6.71E-18    | 2.13E-17    |
| ORM2       | 0.076579212 | 2.804391432 | 5.194591116  | 7.94E-13    | 1.82E-12    |
| SASH3      | 1.770754143 | 10.05557653 | 2.505559977  | 5.97E-35    | 1.28E-33    |
| PARD3-AS1  | 0.513022164 | 1.148093167 | 1.162146661  | 5.76E-09    | 1.04E-08    |
| PRR15      | 14.4380112  | 0.873984751 | -4.04612011  | 1.31E-40    | 2.58E-38    |
| AKRIC1     | 8.402919547 | 3.821344945 | -1.136810178 | 1.97E-08    | 3.44E-08    |
| BX293995.1 | 0.001821509 | 0.287108271 | 7.300317268  | 2.26E-21    | 9.24E-21    |
| HMGNI1P8   | 0.090095302 | 0.299487444 | 1.73297174   | 1.71E-07    | 2.82E-07    |
| RNA5SP203  | 0.137116472 | 0.466449908 | 1.766320269  | 6.54E-09    | 1.18E-08    |
| FOXQ1      | 9.416483194 | 4.09015053  | -1.203034413 | 3.48E-16    | 9.85E-16    |
| RNU6-584P  | 0.130060679 | 0.368300766 | 1.501699535  | 9.34E-06    | 1.38E-05    |
| TLR2       | 2.401574331 | 7.391895057 | 1.621963813  | 4.19E-27    | 2.73E-26    |
| AL592431.1 | 0.028590686 | 0.405737472 | 3.826929395  | 5.93E-21    | 2.34E-20    |
| CLK1       | 8.275146917 | 19.01665938 | 1.200407002  | 1.31E-18    | 4.38E-18    |
| FOXF2      | 0.115490241 | 0.373069307 | 1.691672721  | 2.67E-18    | 8.68E-18    |
| CD69       | 1.38589119  | 3.280271299 | 1.243001147  | 2.21E-16    | 6.33E-16    |
| AC138150.1 | 0.152174906 | 0.324670405 | 1.093245409  | 0.001695939 | 0.002145375 |

Table S1. The differentially expressed genes(DEGs) were screened out in TCGA

| ID         | conMean     | treatMean   | logFC        | pValue      | FDR         |
|------------|-------------|-------------|--------------|-------------|-------------|
| SPON1-AS1  | 0.090233769 | 0.264997037 | 1.554236878  | 1.65E-05    | 2.39E-05    |
| SH2D2A     | 0.393381143 | 2.600390207 | 2.724728417  | 4.40E-31    | 4.51E-30    |
| MEST       | 7.929202094 | 3.564572498 | -1.153446633 | 5.78E-23    | 2.66E-22    |
| KL         | 53.4211564  | 18.70037734 | -1.514343825 | 3.60E-18    | 1.16E-17    |
| COL8A1     | 3.147452988 | 12.4832125  | 1.987732519  | 3.06E-24    | 1.56E-23    |
| AL031602.1 | 0.124185362 | 0.301356923 | 1.278978082  | 0.005427508 | 0.006606452 |
| FBLN7      | 0.327401933 | 1.513740814 | 2.208983461  | 5.27E-21    | 2.09E-20    |
| DPT        | 10.11693416 | 2.111837764 | -2.260201248 | 2.48E-23    | 1.18E-22    |
| EPHA6      | 0.134316144 | 0.356306061 | 1.407484305  | 0.002756833 | 0.003428224 |
| LINC02381  | 30.88938061 | 6.50874254  | -2.246660189 | 4.90E-37    | 2.01E-35    |
| DUX4L50    | 0.411858074 | 1.119098283 | 1.442117569  | 2.51E-21    | 1.02E-20    |
| SFTA2      | 2.895263353 | 0.515823432 | -2.488745366 | 1.45E-33    | 2.29E-32    |
| NINJ2      | 0.398763239 | 1.284402884 | 1.687493488  | 7.26E-29    | 5.68E-28    |
| ADD2       | 0.053915945 | 0.35032464  | 2.699908555  | 2.99E-22    | 1.31E-21    |
| AC092645.1 | 0.354928091 | 1.014702885 | 1.515458686  | 3.74E-09    | 6.83E-09    |
| IGHV1-69D  | 5.593177516 | 17.24997021 | 1.624853846  | 0.001680769 | 0.002126708 |
| ARMC12     | 0.089948121 | 0.371689272 | 2.046932003  | 1.72E-19    | 6.11E-19    |
| SCD        | 11.16170549 | 90.01779866 | 3.0116528    | 3.02E-35    | 6.99E-34    |
| GMNC       | 1.494253624 | 0.132791998 | -3.492184927 | 5.15E-17    | 1.54E-16    |
| SUSD1      | 10.41714931 | 3.834843108 | -1.441721072 | 1.69E-32    | 2.21E-31    |
| AC022960.1 | 0.056336854 | 0.312443023 | 2.471442222  | 4.97E-09    | 8.99E-09    |
| AGAP2      | 0.173813083 | 1.13906475  | 2.712241179  | 3.03E-39    | 2.92E-37    |
| AL049840.5 | 0.282955951 | 0.865366204 | 1.6127333    | 2.81E-13    | 6.61E-13    |
| DERL3      | 0.658600557 | 2.965654707 | 2.170874997  | 2.06E-23    | 9.86E-23    |
| AC010487.2 | 0.181014186 | 0.798013912 | 2.140311137  | 5.98E-17    | 1.78E-16    |
| AC007637.1 | 2.486030985 | 1.11299636  | -1.159395403 | 1.88E-21    | 7.72E-21    |
| SLC47A1P1  | 0.083782365 | 0.379165453 | 2.178109016  | 6.91E-16    | 1.92E-15    |
| IGLV2-14   | 23.7326758  | 98.57276775 | 2.054314365  | 4.44E-06    | 6.67E-06    |
| P4HA3      | 0.305583323 | 2.089957349 | 2.773835782  | 6.55E-29    | 5.16E-28    |
| C3orf86    | 0.758859821 | 0.225647594 | -1.749762014 | 6.16E-28    | 4.35E-27    |
| AC007036.1 | 0.141953239 | 0.300129694 | 1.080170291  | 0.004693524 | 0.005737458 |
| NIPAL1     | 4.809330513 | 0.496577127 | -3.275746361 | 2.37E-38    | 1.57E-36    |
| AL008723.3 | 0.046784342 | 0.287412023 | 2.619022758  | 2.29E-14    | 5.77E-14    |
| SCGB3A2    | 0.016306443 | 0.698494462 | 5.420734615  | 1.53E-27    | 1.04E-26    |
| IGLV2-8    | 4.389469195 | 17.26615716 | 1.97582863   | 6.16E-07    | 9.79E-07    |
| ACTG1P14   | 0.11636481  | 0.266377463 | 1.194817198  | 2.19E-12    | 4.87E-12    |
| YJEFN3     | 0.272044113 | 1.205023804 | 2.147149135  | 1.07E-13    | 2.58E-13    |
| GAP43      | 0.092897367 | 0.251906327 | 1.439177747  | 1.97E-09    | 3.66E-09    |
| FOXF1      | 0.901184725 | 2.377155022 | 1.399341224  | 4.16E-18    | 1.34E-17    |
| HDAC10     | 0.607280494 | 1.769920006 | 1.543249221  | 2.83E-26    | 1.72E-25    |
| PLXNC1     | 1.1945283   | 3.515213769 | 1.557171392  | 2.64E-23    | 1.25E-22    |
| AC005180.2 | 0.283015561 | 0.571910798 | 1.014908768  | 8.13E-08    | 1.36E-07    |
| AC011468.1 | 0.622300789 | 1.65878468  | 1.414442648  | 3.06E-24    | 1.56E-23    |
| IGLV3-21   | 12.38973266 | 56.10132689 | 2.178889836  | 5.09E-06    | 7.63E-06    |
| AL133215.1 | 0.073067412 | 0.222244491 | 1.604847648  | 1.66E-09    | 3.09E-09    |
| PRF1       | 1.677410115 | 10.782119   | 2.684333371  | 6.58E-35    | 1.40E-33    |
| TMEM233    | 0.613281449 | 2.56744766  | 2.06571365   | 1.28E-29    | 1.09E-28    |
| IRX2       | 8.608547688 | 0.266990544 | -5.010909314 | 1.31E-41    | 4.16E-39    |
| TRAV8-3    | 0.223816011 | 0.979909809 | 2.130335726  | 1.91E-16    | 5.49E-16    |
| AGAP9      | 0.659345135 | 1.575940362 | 1.257107192  | 8.44E-09    | 1.51E-08    |
| ITGB2      | 4.560106314 | 24.18347272 | 2.406882064  | 3.25E-34    | 5.87E-33    |
| MME        | 44.25642935 | 13.73022218 | -1.688532087 | 5.23E-06    | 7.83E-06    |
| S100A9     | 18.61200506 | 39.07580521 | 1.070042118  | 2.79E-10    | 5.44E-10    |
| PLOD1      | 22.33061819 | 56.13843988 | 1.32996578   | 2.72E-31    | 2.88E-30    |
| GCNA       | 0.131661904 | 0.398376327 | 1.59729395   | 5.04E-17    | 1.51E-16    |

Table S1. The differentially expressed genes(DEGs) were screened out in TCGA

| ID         | conMean     | treatMean   | logFC        | pValue      | FDR         |
|------------|-------------|-------------|--------------|-------------|-------------|
| LINC01268  | 0.417985647 | 2.241825967 | 2.423148979  | 9.01E-29    | 6.97E-28    |
| LINC01607  | 0.626987187 | 0.249280033 | -1.330668632 | 2.97E-20    | 1.11E-19    |
| RNF165     | 0.253882234 | 0.681702759 | 1.42498338   | 3.92E-13    | 9.14E-13    |
| MIR4782    | 0.16437444  | 0.383038563 | 1.220503663  | 5.32E-05    | 7.45E-05    |
| INE1       | 0.721406906 | 1.498679534 | 1.054806783  | 8.66E-11    | 1.74E-10    |
| LIX1       | 5.394239722 | 1.579757224 | -1.771716773 | 1.23E-20    | 4.75E-20    |
| BID        | 2.75022775  | 5.892018811 | 1.099210941  | 1.10E-35    | 2.85E-34    |
| AC002128.1 | 0.20441707  | 0.666121531 | 1.704269738  | 6.57E-12    | 1.42E-11    |
| MIR497HG   | 0.298492424 | 0.81925111  | 1.456611409  | 5.71E-22    | 2.44E-21    |
| FAM153C    | 0.028358289 | 1.114719651 | 5.296766622  | 5.24E-27    | 3.38E-26    |
| MAPK15     | 1.030271925 | 3.960718847 | 1.942737129  | 5.53E-13    | 1.28E-12    |
| AC005104.1 | 0.290904015 | 1.230954214 | 2.081161986  | 1.63E-19    | 5.80E-19    |
| FAM57B     | 0.006646536 | 0.236835249 | 5.155137319  | 2.68E-30    | 2.48E-29    |
| AC112491.1 | 0.359300245 | 1.373930144 | 1.93504683   | 3.83E-21    | 1.54E-20    |
| RPS20P22   | 0.11999109  | 0.28187575  | 1.232132092  | 4.20E-05    | 5.92E-05    |
| AC009041.4 | 0.198565477 | 0.431808615 | 1.12077721   | 5.20E-16    | 1.46E-15    |
| GTF2IP23   | 0.657663858 | 1.902858313 | 1.532745849  | 3.95E-14    | 9.77E-14    |
| AC010333.2 | 0.091907648 | 0.228273823 | 1.312508616  | 0.015290585 | 0.017959982 |
| NUPR1      | 11.25090435 | 28.31621185 | 1.331587304  | 3.33E-14    | 8.30E-14    |
| MIR210     | 0.255814454 | 3.803167669 | 3.894031859  | 5.89E-30    | 5.23E-29    |
| SERPINA1   | 106.3144874 | 333.446596  | 1.649117516  | 7.83E-14    | 1.91E-13    |
| ADAM8      | 0.588298344 | 2.56805713  | 2.126057416  | 8.44E-28    | 5.86E-27    |
| AC145098.1 | 0.201499502 | 1.140631816 | 2.500985002  | 5.77E-34    | 9.93E-33    |
| FDXR       | 2.955498444 | 7.781235188 | 1.396597725  | 5.67E-32    | 6.70E-31    |
| UNC13D     | 0.448942081 | 2.060304782 | 2.198256536  | 1.66E-33    | 2.60E-32    |
| AL590999.1 | 0.100026162 | 0.680252753 | 2.765693495  | 4.65E-19    | 1.60E-18    |
| OASL       | 1.068942564 | 3.167356973 | 1.567095137  | 7.52E-24    | 3.71E-23    |
| DTX2P1     | 0.214173535 | 0.671395063 | 1.648381706  | 1.76E-27    | 1.18E-26    |
| UGT2B7     | 235.8441965 | 102.7707512 | -1.198404373 | 0.022276879 | 0.025867816 |
| LAIR1      | 0.892522766 | 5.657179956 | 2.664122191  | 2.97E-36    | 8.96E-35    |
| PSMG3-AS1  | 2.237111832 | 0.938160688 | -1.253730424 | 7.25E-30    | 6.34E-29    |
| PECAM1     | 38.35099306 | 91.37525312 | 1.252539562  | 3.13E-21    | 1.26E-20    |
| AC129507.2 | 3.994117367 | 1.917423659 | -1.058707588 | 3.00E-21    | 1.21E-20    |
| AC025627.1 | 0.300878241 | 1.372503166 | 2.189557797  | 1.03E-12    | 2.35E-12    |
| MYOC       | 0.582438392 | 1.198950681 | 1.041594955  | 3.23E-05    | 4.59E-05    |
| LST1       | 1.79740901  | 8.571814986 | 2.253681972  | 9.86E-35    | 2.01E-33    |
| AL021068.1 | 1.84244905  | 0.321199044 | -2.520085222 | 1.21E-37    | 6.18E-36    |
| ITGAD      | 0.021203334 | 0.600487968 | 4.823772315  | 1.71E-39    | 1.90E-37    |
| XPNPEP2    | 59.53000315 | 1.464139854 | -5.345491699 | 2.88E-24    | 1.47E-23    |
| AC008610.1 | 0.648958053 | 1.7859403   | 1.460486722  | 1.03E-11    | 2.20E-11    |
| HOXA11-AS  | 0.80562704  | 0.315004117 | -1.354741423 | 1.05E-27    | 7.22E-27    |
| CD86       | 1.224751815 | 5.447647688 | 2.153143974  | 1.68E-30    | 1.60E-29    |
| AC018638.8 | 1.696416133 | 3.533608455 | 1.058652081  | 4.46E-10    | 8.58E-10    |
| TRAV1-2    | 0.166123721 | 0.76676314  | 2.206522893  | 1.26E-16    | 3.68E-16    |
| WISP2      | 0.139120158 | 1.440516521 | 3.372182828  | 3.89E-14    | 9.65E-14    |
| SLC30A2    | 8.328763157 | 0.800618674 | -3.378915096 | 3.18E-30    | 2.92E-29    |
| AC005839.1 | 0.2154785   | 0.530010609 | 1.29847731   | 4.54E-21    | 1.81E-20    |
| GAPDH      | 522.868625  | 1428.527476 | 1.450008377  | 7.25E-37    | 2.78E-35    |
| MORN5      | 0.81603014  | 0.39418697  | -1.049742352 | 7.72E-21    | 3.02E-20    |
| ST14       | 37.08638458 | 14.5993315  | -1.344987322 | 2.05E-26    | 1.26E-25    |
| ERO1A      | 6.665221556 | 18.30561546 | 1.457561542  | 1.04E-35    | 2.74E-34    |
| MPP5       | 12.08307018 | 4.76055887  | -1.34378422  | 1.01E-37    | 5.30E-36    |
| ZNF426-DT  | 1.810307133 | 0.798110749 | -1.181573623 | 8.82E-22    | 3.72E-21    |
| AP006296.1 | 0.583085258 | 0.161696565 | -1.850417816 | 1.15E-29    | 9.89E-29    |
| DDX47      | 0.147418555 | 0.473119744 | 1.682287248  | 1.44E-24    | 7.57E-24    |

Table S1. The differentially expressed genes(DEGs) were screened out in TCGA

| ID         | conMean     | treatMean   | logFC        | pValue      | FDR         |
|------------|-------------|-------------|--------------|-------------|-------------|
| HIST2H2BD  | 0.134587179 | 0.276242957 | 1.037396702  | 3.94E-08    | 6.75E-08    |
| CBLN4      | 0.384914935 | 1.655152095 | 2.104352239  | 8.78E-11    | 1.77E-10    |
| AC006270.1 | 0.035903486 | 0.378536648 | 3.398237156  | 2.08E-09    | 3.86E-09    |
| GTSE1-DT   | 0.813555493 | 0.290259252 | -1.486898701 | 1.57E-26    | 9.76E-26    |
| SLAMF8     | 1.087885257 | 7.058921058 | 2.697921289  | 2.11E-31    | 2.27E-30    |
| MKLN1-AS   | 2.763880447 | 1.275506148 | -1.11562536  | 1.94E-23    | 9.33E-23    |
| TMEM179    | 0.080882284 | 0.877063473 | 3.438785605  | 6.81E-16    | 1.89E-15    |
| CENPM      | 0.391057447 | 1.765151577 | 2.174339612  | 8.69E-36    | 2.34E-34    |
| MIR3164    | 0.141361582 | 0.673699875 | 2.252715942  | 3.14E-11    | 6.50E-11    |
| HLA-DQB1-A | 0.995988793 | 4.980997234 | 2.322233196  | 6.05E-24    | 3.02E-23    |
| AC073611.1 | 0.303039913 | 1.439374415 | 2.24786219   | 1.96E-35    | 4.74E-34    |
| EMB        | 1.590882528 | 4.852979378 | 1.60904342   | 6.90E-24    | 3.41E-23    |
| SLC2A1-AS1 | 0.255366381 | 0.606771646 | 1.248585066  | 2.57E-17    | 7.84E-17    |
| TTC4P1     | 0.015392382 | 0.436816111 | 4.826737692  | 6.09E-24    | 3.04E-23    |
| PPIAP72    | 0.066204868 | 0.222016041 | 1.745654701  | 7.04E-13    | 1.62E-12    |
| MYL5       | 1.239646678 | 2.933956057 | 1.242918279  | 1.41E-25    | 8.10E-25    |
| HNRNPA3P9  | 0.109791826 | 0.250439642 | 1.189692294  | 6.67E-08    | 1.13E-07    |
| MNDA       | 2.405670243 | 8.574885096 | 1.83367844   | 3.07E-26    | 1.86E-25    |
| AC131212.2 | 0.124790647 | 0.437859981 | 1.810959789  | 1.82E-13    | 4.32E-13    |
| CMTM2      | 0.161999704 | 0.368444491 | 1.185456106  | 1.31E-11    | 2.77E-11    |
| SLC1A3     | 0.5760844   | 3.952321389 | 2.77834817   | 3.19E-32    | 3.92E-31    |
| AP003419.3 | 0.174521697 | 0.562227973 | 1.687748827  | 8.50E-12    | 1.82E-11    |
| ATP5F1B    | 521.4805528 | 259.2292114 | -1.008385154 | 2.70E-32    | 3.37E-31    |
| AL513477.2 | 0.355740914 | 0.839156655 | 1.238113252  | 3.71E-11    | 7.64E-11    |
| AC103739.1 | 0.092515742 | 0.249590346 | 1.431791369  | 1.05E-09    | 1.98E-09    |
| KAT2A      | 5.348032903 | 11.88696787 | 1.152300513  | 1.06E-17    | 3.32E-17    |
| AC010469.1 | 0.09448154  | 0.234176036 | 1.309489058  | 0.000235574 | 0.000316209 |
| TNIP1      | 36.42815028 | 75.60517377 | 1.053431223  | 2.61E-30    | 2.42E-29    |
| SNORD72    | 0.106631656 | 0.35935019  | 1.752754656  | 1.96E-05    | 2.82E-05    |
| GLTPD2     | 6.746808654 | 3.294859115 | -1.033988468 | 3.78E-07    | 6.08E-07    |
| TAF1D      | 2.674472222 | 7.676171724 | 1.521132767  | 3.84E-38    | 2.38E-36    |
| CIB4       | 0.204928942 | 1.183853107 | 2.530294427  | 5.19E-18    | 1.66E-17    |
| AC079779.2 | 0.537962561 | 1.575286866 | 1.550036895  | 0.007791627 | 0.009371073 |
| AL021707.6 | 0.457953759 | 1.920309812 | 2.06806525   | 1.75E-18    | 5.76E-18    |
| C17orf107  | 1.043981781 | 2.347476805 | 1.169014369  | 6.48E-14    | 1.58E-13    |
| AC011939.2 | 0.008456496 | 0.240638367 | 4.830662878  | 7.92E-11    | 1.60E-10    |
| AC079145.1 | 0.783475566 | 0.317123217 | -1.304844779 | 1.76E-18    | 5.80E-18    |
| SCARNA20   | 0.093194376 | 0.421784071 | 2.178189811  | 3.67E-08    | 6.30E-08    |
| LINC01886  | 0.307132188 | 1.617644497 | 2.396962965  | 1.58E-14    | 4.02E-14    |
| AL592546.1 | 0.840954661 | 0.119799743 | -2.811403206 | 3.73E-35    | 8.40E-34    |
| MAL2       | 94.40825665 | 13.64566843 | -2.790469972 | 3.03E-37    | 1.34E-35    |
| CYP21A2    | 0.115831797 | 0.658639805 | 2.507458363  | 3.12E-22    | 1.36E-21    |
| HSPA8P15   | 0.078928468 | 0.29046177  | 1.879730643  | 2.41E-16    | 6.90E-16    |
| TP53I11    | 9.189451056 | 19.54063697 | 1.088426908  | 6.23E-18    | 1.98E-17    |
| AC093583.1 | 7.450630268 | 2.086020688 | -1.836609006 | 1.21E-22    | 5.44E-22    |
| NANOS1     | 1.425184593 | 0.462028822 | -1.625094035 | 2.46E-21    | 1.01E-20    |
| AC027796.2 | 0.089327744 | 0.288656987 | 1.692175909  | 7.10E-09    | 1.27E-08    |
| GOLGA6L7   | 0.015724672 | 0.272924737 | 4.117401362  | 0.008119664 | 0.009754778 |
| IDUA       | 1.524896753 | 3.599673327 | 1.239154422  | 3.72E-24    | 1.89E-23    |
| ASAP2      | 8.773921986 | 4.02941523  | -1.122651396 | 1.92E-29    | 1.60E-28    |
| ZMYND12    | 4.208118525 | 1.681946015 | -1.32304394  | 7.66E-31    | 7.62E-30    |
| HMGB3P32   | 0.037206387 | 0.228376937 | 2.617794766  | 6.99E-20    | 2.56E-19    |
| CFP        | 0.347637119 | 0.871758225 | 1.326345938  | 5.97E-20    | 2.19E-19    |
| AKIRIN1    | 32.9478725  | 15.62639632 | -1.076200202 | 1.45E-34    | 2.84E-33    |
| GPR155     | 6.365621819 | 3.074384805 | -1.050003698 | 9.44E-22    | 3.97E-21    |

Table S1. The differentially expressed genes(DEGs) were screened out in TCGA

| ID          | conMean     | treatMean   | logFC        | pValue      | FDR         |
|-------------|-------------|-------------|--------------|-------------|-------------|
| VGLL3       | 1.725942197 | 0.679618587 | -1.344586934 | 2.63E-18    | 8.58E-18    |
| AC026471.3  | 0.916604604 | 0.190983233 | -2.262853549 | 3.50E-19    | 1.22E-18    |
| ODF2-AS1    | 0.060157594 | 0.223793034 | 1.895346354  | 4.07E-11    | 8.35E-11    |
| YES1P1      | 0.033598984 | 0.260090488 | 2.952524128  | 3.06E-24    | 1.56E-23    |
| FAM71F2     | 0.136669188 | 0.336417564 | 1.299565009  | 3.71E-07    | 5.97E-07    |
| BDH2P1      | 0.416468143 | 0.203678631 | -1.031911518 | 3.08E-13    | 7.21E-13    |
| CKM         | 0.902833927 | 0.129967094 | -2.796314232 | 1.68E-16    | 4.85E-16    |
| CLEC5A      | 0.340400289 | 1.420781834 | 2.061380874  | 3.36E-25    | 1.86E-24    |
| CDC6        | 0.273359045 | 1.075979973 | 1.976782209  | 1.10E-33    | 1.78E-32    |
| PHGDH       | 15.55599317 | 6.076919757 | -1.356058359 | 6.45E-26    | 3.81E-25    |
| AL139421.1  | 0.145582998 | 0.412085328 | 1.501101215  | 8.77E-12    | 1.88E-11    |
| TMEM72      | 62.32633997 | 7.618779573 | -3.032210174 | 9.26E-37    | 3.45E-35    |
| RNU6-312P   | 0.263787836 | 1.222036765 | 2.211837746  | 2.39E-15    | 6.41E-15    |
| WDR62       | 0.108813111 | 0.315398072 | 1.535321439  | 1.52E-28    | 1.15E-27    |
| RGS1        | 3.688435003 | 32.59565004 | 3.143598729  | 7.71E-35    | 1.60E-33    |
| GXYLT2      | 0.665322289 | 2.543195282 | 1.934516975  | 1.43E-10    | 2.84E-10    |
| SIPA1L2     | 3.187093342 | 7.282658391 | 1.192223901  | 4.73E-24    | 2.38E-23    |
| RNU6ATAC1   | 0.201079619 | 0.710020398 | 1.820093608  | 3.63E-05    | 5.14E-05    |
| PLK2        | 5.418387389 | 25.39042822 | 2.228349279  | 2.44E-35    | 5.76E-34    |
| RNA5SP18    | 0.147594589 | 1.75606293  | 3.572632808  | 2.70E-29    | 2.22E-28    |
| AC008555.5  | 0.616108581 | 1.60007634  | 1.376884205  | 2.86E-18    | 9.27E-18    |
| ANGPTL8     | 0.207657269 | 3.07074218  | 3.886311108  | 1.84E-08    | 3.22E-08    |
| RNU6-387P   | 0.169787466 | 0.510991274 | 1.589568691  | 8.43E-08    | 1.41E-07    |
| LDHAP3      | 0.205788991 | 0.725188683 | 1.817190604  | 1.44E-16    | 4.17E-16    |
| AC120498.2  | 0.036224045 | 0.244667768 | 2.755804487  | 1.06E-10    | 2.12E-10    |
| SLC38A3     | 1.429770997 | 0.437433077 | -1.708649871 | 4.21E-31    | 4.34E-30    |
| AGAP4       | 0.232678751 | 0.511758074 | 1.137122495  | 6.62E-14    | 1.62E-13    |
| LINC02188   | 0.288385679 | 4.111824487 | 3.833707255  | 3.96E-33    | 5.80E-32    |
| LINC02487   | 0.073158506 | 0.242901513 | 1.731273964  | 6.11E-21    | 2.41E-20    |
| IQGAP2      | 13.63318647 | 6.589664084 | -1.048845972 | 1.97E-12    | 4.39E-12    |
| AC009185.1  | 0.869134477 | 0.265513657 | -1.710793345 | 1.49E-22    | 6.63E-22    |
| THSD7A      | 10.1749424  | 3.184596181 | -1.675838278 | 2.49E-35    | 5.86E-34    |
| RNF43       | 3.682605844 | 0.636477177 | -2.532546304 | 5.50E-38    | 3.22E-36    |
| AC100812.1  | 0.104792781 | 0.264963836 | 1.338256134  | 0.001312864 | 0.001674985 |
| HLA-A       | 258.0919347 | 835.7994612 | 1.69527177   | 4.97E-38    | 2.96E-36    |
| GDF6        | 0.37890828  | 4.544392649 | 3.584166923  | 2.78E-29    | 2.27E-28    |
| PRRX2       | 0.448125566 | 1.025560219 | 1.194437267  | 4.36E-05    | 6.14E-05    |
| AC079313.1  | 0.050808629 | 0.403234257 | 2.988472755  | 3.32E-23    | 1.56E-22    |
| PPP1R3C     | 7.713945653 | 29.83253044 | 1.951345467  | 1.92E-32    | 2.48E-31    |
| MAP3K9      | 1.292951718 | 0.409639468 | -1.658241774 | 3.13E-36    | 9.37E-35    |
| AC034243.1  | 1.247529015 | 0.437180451 | -1.512772574 | 3.07E-16    | 8.71E-16    |
| SLCO2B1     | 3.712007903 | 11.62793469 | 1.647323186  | 3.01E-22    | 1.32E-21    |
| AF064858.3  | 0.393570098 | 3.733111896 | 3.245686231  | 4.08E-17    | 1.23E-16    |
| PPP1R3G     | 0.450707474 | 2.008353376 | 2.15574986   | 8.05E-35    | 1.67E-33    |
| SUCLA2-AS1  | 0.831175993 | 0.367382985 | -1.177869173 | 8.57E-28    | 5.94E-27    |
| AL021707.8  | 0.398045527 | 1.502743392 | 1.916593322  | 1.98E-16    | 5.70E-16    |
| EFNA1       | 21.27078333 | 50.18426558 | 1.238361939  | 9.48E-26    | 5.51E-25    |
| PRRT3       | 1.363433739 | 0.558356262 | -1.287986749 | 5.32E-31    | 5.40E-30    |
| AL391832.3  | 0.098967349 | 0.230033231 | 1.216817749  | 1.39E-16    | 4.04E-16    |
| SLC14A1     | 13.07680767 | 1.642118798 | -2.993379984 | 3.05E-27    | 2.02E-26    |
| KCNH6       | 2.296244342 | 0.619206005 | -1.890784798 | 0.000275594 | 0.000368078 |
| C1QTNF1-AS0 | 0.115380541 | 0.494735175 | 2.100256545  | 7.26E-07    | 1.15E-06    |
| LRRC19      | 17.56810768 | 4.554621854 | -1.947555617 | 7.21E-33    | 1.00E-31    |
| AC004923.4  | 0.157851053 | 0.649031048 | 2.039723608  | 3.03E-22    | 1.32E-21    |
| IL18RAP     | 0.202747075 | 0.690481198 | 1.767921031  | 3.10E-24    | 1.58E-23    |

Table S1. The differentially expressed genes(DEGs) were screened out in TCGA

| ID         | conMean     | treatMean   | logFC        | pValue      | FDR         |
|------------|-------------|-------------|--------------|-------------|-------------|
| IGKV1D-16  | 0.38308698  | 1.78084432  | 2.216817506  | 4.62E-05    | 6.50E-05    |
| TSPAN8     | 25.3138838  | 1.662685825 | -3.928341378 | 7.50E-39    | 5.87E-37    |
| MIR6819    | 0.131684028 | 1.098284751 | 3.060099875  | 9.24E-17    | 2.71E-16    |
| CTHRC1     | 1.958374904 | 16.23718885 | 3.051572999  | 1.44E-27    | 9.76E-27    |
| SLC25A15   | 4.449283264 | 2.080018394 | -1.096976665 | 1.30E-32    | 1.73E-31    |
| SLC9B2     | 0.6084479   | 1.311727146 | 1.108262015  | 1.01E-18    | 3.38E-18    |
| ADCY8      | 0.108427298 | 1.002621743 | 3.208977506  | 0.002645    | 0.003293533 |
| OXNAD1     | 3.333847335 | 1.525834259 | -1.127589781 | 2.81E-32    | 3.49E-31    |
| PSMB8-AS1  | 3.218310639 | 9.132174165 | 1.504654789  | 3.14E-37    | 1.38E-35    |
| RNU6ATAC1  | 0.106469904 | 0.290015174 | 1.445682709  | 0.00161349  | 0.002044218 |
| LINC01485  | 0.914876842 | 0.224060733 | -2.029687706 | 3.48E-30    | 3.19E-29    |
| HSF4       | 0.362248841 | 19.79881145 | 5.772288941  | 4.21E-41    | 1.14E-38    |
| SMIM3      | 14.50620486 | 31.31809397 | 1.110326284  | 3.40E-05    | 4.81E-05    |
| AC010422.2 | 0.079124815 | 0.265622299 | 1.747174149  | 1.59E-11    | 3.35E-11    |
| RNA5SP311  | 0.31301377  | 0.794904848 | 1.344556053  | 4.90E-06    | 7.34E-06    |
| TMEM86B    | 0.293071884 | 0.69513487  | 1.246038347  | 1.08E-18    | 3.62E-18    |
| OMG        | 0.037640447 | 1.127563107 | 4.904780599  | 1.83E-25    | 1.04E-24    |
| AC011481.1 | 0.20753463  | 0.776333208 | 1.903323909  | 2.38E-11    | 4.96E-11    |
| PDLIM7     | 4.963670014 | 9.946592747 | 1.0027952    | 4.24E-18    | 1.36E-17    |
| MIR23C     | 0.026604671 | 0.886837322 | 5.058918027  | 1.41E-16    | 4.10E-16    |
| GAPDHP65   | 0.493681739 | 1.111621388 | 1.171012311  | 9.09E-17    | 2.67E-16    |
| ZNF205     | 3.701642111 | 7.600154861 | 1.037863399  | 1.20E-31    | 1.33E-30    |
| TEX11      | 0.167128398 | 1.922829313 | 3.524201906  | 2.49E-21    | 1.02E-20    |
| GBAP1      | 0.408327738 | 0.906165487 | 1.150046971  | 3.81E-17    | 1.15E-16    |
| ZGLP1      | 0.148044303 | 0.356489216 | 1.26782946   | 4.48E-14    | 1.10E-13    |
| TBC1D30    | 1.277251519 | 0.593503084 | -1.105715221 | 4.98E-31    | 5.07E-30    |
| AC138393.3 | 0.186656787 | 0.389095668 | 1.059736951  | 0.001242173 | 0.001587847 |
| PAGE2B     | 0.009714654 | 0.597116308 | 5.941705605  | 1.08E-09    | 2.03E-09    |
| AL162741.1 | 0.046637788 | 0.230315141 | 2.304037977  | 1.56E-20    | 6.00E-20    |
| AC139887.1 | 0.42619266  | 0.957318528 | 1.167493286  | 3.46E-10    | 6.70E-10    |
| WNT10A     | 1.258375029 | 0.532367063 | -1.241068725 | 5.79E-18    | 1.84E-17    |
| STAB1      | 4.505997458 | 14.95877809 | 1.731073928  | 2.67E-29    | 2.19E-28    |
| CD93       | 21.28892224 | 45.23346658 | 1.08728765   | 1.38E-14    | 3.52E-14    |
| AL033397.1 | 0.541005382 | 0.223970083 | -1.272336907 | 1.03E-08    | 1.84E-08    |
| FAM193B    | 1.966080549 | 8.585823902 | 2.126634154  | 7.19E-30    | 6.29E-29    |
| AC139100.1 | 0.207473974 | 0.417210952 | 1.007846656  | 2.78E-08    | 4.81E-08    |
| MCAM       | 15.03714426 | 63.34914728 | 2.074794592  | 1.48E-31    | 1.62E-30    |
| Z84485.1   | 0.19281286  | 0.493649144 | 1.356284746  | 1.18E-09    | 2.21E-09    |
| LTA        | 0.091767198 | 0.577242079 | 2.653126016  | 1.06E-27    | 7.30E-27    |
| AC039056.2 | 1.148164435 | 0.572155555 | -1.004849936 | 3.18E-08    | 5.48E-08    |
| TRAV12-1   | 0.194002807 | 1.310076449 | 2.755501573  | 7.45E-20    | 2.72E-19    |
| SPC24      | 0.29440191  | 1.416040924 | 2.266004024  | 1.13E-33    | 1.82E-32    |
| ZDHHC15    | 1.221313929 | 0.50516936  | -1.273595038 | 3.51E-30    | 3.21E-29    |
| BEST1      | 0.245153189 | 0.912996022 | 1.896925047  | 1.20E-32    | 1.62E-31    |
| GNRH1      | 0.178043116 | 1.28296754  | 2.849186111  | 1.65E-31    | 1.80E-30    |
| ENPP3      | 3.092035128 | 78.62046653 | 4.66827631   | 3.06E-32    | 3.77E-31    |
| SLC6A1     | 0.37253083  | 1.828547538 | 2.295266404  | 3.26E-28    | 2.37E-27    |
| CSPG4P10   | 0.113999015 | 0.249664344 | 1.130968435  | 5.40E-12    | 1.17E-11    |
| RNU6-549P  | 0.03189019  | 0.392262146 | 3.620633507  | 3.60E-09    | 6.57E-09    |
| DLGAP5     | 0.248132319 | 0.993828229 | 2.001886866  | 2.98E-32    | 3.68E-31    |
| WNK1       | 34.29279611 | 12.25156867 | -1.48493906  | 1.14E-34    | 2.28E-33    |
| RHBDF2     | 2.104422932 | 8.122403312 | 1.948481989  | 1.08E-37    | 5.60E-36    |
| RNU6-824P  | 0.122884462 | 0.322448376 | 1.391765701  | 0.001658263 | 0.002099134 |
| VAT1L      | 6.471405132 | 1.085896058 | -2.575192982 | 6.01E-32    | 7.08E-31    |
| GP2        | 3.012645749 | 0.025188552 | -6.902119031 | 1.11E-42    | 5.86E-40    |

Table S1. The differentially expressed genes(DEGs) were screened out in TCGA

| ID          | conMean     | treatMean   | logFC        | pValue   | FDR      |
|-------------|-------------|-------------|--------------|----------|----------|
| TNFRSF14-A' | 0.585105108 | 1.91843143  | 1.713159481  | 2.19E-21 | 8.98E-21 |
| AP005131.5  | 0.01885711  | 0.277348897 | 3.878521507  | 3.78E-14 | 9.39E-14 |
| RNU7-84P    | 0.184455976 | 1.164476448 | 2.658333023  | 1.68E-06 | 2.60E-06 |
| CLEC2B      | 1.543810914 | 7.493377704 | 2.27912011   | 7.08E-36 | 1.94E-34 |
| RPS29P16    | 0.269950593 | 0.738530936 | 1.451962971  | 3.49E-13 | 8.16E-13 |
| VWCE        | 0.467453959 | 3.153475373 | 2.754046485  | 4.32E-23 | 2.01E-22 |
| WNK3        | 0.755702029 | 0.281478157 | -1.424794527 | 1.05E-33 | 1.71E-32 |
| SLC22A6     | 89.75103601 | 12.76920908 | -2.813259424 | 2.08E-10 | 4.10E-10 |
| GPSM3       | 4.883909375 | 18.68207295 | 1.935546209  | 2.53E-35 | 5.95E-34 |
| FCGR2C      | 0.161353472 | 1.876844382 | 3.540012511  | 1.99E-34 | 3.77E-33 |
| LINC01077   | 0.195286124 | 6.408140665 | 5.03624447   | 4.11E-36 | 1.19E-34 |
| MSRA        | 19.17340599 | 8.286897354 | -1.210202684 | 2.01E-08 | 3.50E-08 |
| OVCH2       | 3.986696969 | 0.19003316  | -4.390870859 | 7.66E-42 | 2.82E-39 |
| PRR36       | 1.141640168 | 0.419455619 | -1.444517922 | 7.92E-28 | 5.52E-27 |
| AC127502.1  | 0.13812623  | 0.351445354 | 1.347313069  | 1.62E-19 | 5.78E-19 |
| ARHGAP4     | 3.639885756 | 7.800654666 | 1.099702037  | 1.13E-19 | 4.09E-19 |
| CSAD        | 1.590289622 | 4.768674093 | 1.584298656  | 1.24E-13 | 2.99E-13 |
| PLXND1      | 9.233672639 | 28.41906014 | 1.621882353  | 6.88E-31 | 6.89E-30 |
| AC019171.1  | 0.455062892 | 0.222421468 | -1.0327699   | 6.46E-22 | 2.75E-21 |
| USP46-AS1   | 4.355235583 | 1.58024621  | -1.462601404 | 3.25E-38 | 2.06E-36 |
| AL592114.3  | 0.831015308 | 0.287067181 | -1.53348665  | 4.35E-22 | 1.87E-21 |
| TFAP2B      | 6.527445387 | 0.126779197 | -5.686128545 | 3.64E-41 | 1.01E-38 |
| NCF4        | 1.735199821 | 7.074388123 | 2.027503563  | 2.00E-32 | 2.58E-31 |
| PRLR        | 5.089004043 | 1.480109057 | -1.781679857 | 5.65E-17 | 1.68E-16 |
| MIR509-1    | 0.018223036 | 0.317926874 | 4.124859723  | 2.86E-13 | 6.71E-13 |
| AC022784.5  | 0.237053066 | 0.78364534  | 1.72499082   | 7.66E-15 | 1.99E-14 |
| AL049838.1  | 9.722105714 | 0.849197715 | -3.517096428 | 9.90E-40 | 1.24E-37 |
| AL390208.1  | 0.176572623 | 0.473033455 | 1.421680547  | 2.12E-13 | 5.03E-13 |
| AC008906.1  | 0.438708328 | 1.025164652 | 1.224521642  | 5.75E-17 | 1.71E-16 |
| AL512274.1  | 0.598685306 | 0.288258902 | -1.054432698 | 2.33E-11 | 4.87E-11 |
| PKNOX2      | 0.785185504 | 0.268871452 | -1.546116957 | 2.07E-27 | 1.39E-26 |
| PNPLA7      | 0.564264138 | 1.717209593 | 1.605623572  | 3.18E-16 | 9.03E-16 |
| TRBV4-1     | 0.123017573 | 1.354294019 | 3.460604661  | 1.01E-21 | 4.23E-21 |
| KLHL2P1     | 0.183310527 | 0.735908388 | 2.00523654   | 2.74E-28 | 2.01E-27 |
| TRAJ35      | 0.43073961  | 0.187077841 | -1.203177312 | 1.11E-06 | 1.73E-06 |
| MUC20-OT1   | 0.875010683 | 2.629490607 | 1.587410807  | 5.48E-14 | 1.34E-13 |
| CFAP73      | 0.475466897 | 0.172819063 | -1.460082536 | 1.56E-10 | 3.10E-10 |
| EGFL8       | 0.203743336 | 0.776781758 | 1.930756449  | 1.69E-13 | 4.02E-13 |
| GRIP1       | 1.363728893 | 0.548100122 | -1.315045508 | 8.11E-28 | 5.65E-27 |
| LINC00861   | 0.089858191 | 0.728956025 | 3.020109864  | 1.93E-31 | 2.09E-30 |
| SAT2        | 60.59576681 | 28.08924389 | -1.109199221 | 5.14E-22 | 2.21E-21 |
| TNFRSF1B    | 8.299252042 | 22.28444455 | 1.424983775  | 6.71E-29 | 5.27E-28 |
| ROPN1L      | 0.27458781  | 0.649811253 | 1.242753148  | 3.55E-19 | 1.23E-18 |
| NUGGC       | 2.032220332 | 0.87120925  | -1.22196565  | 4.50E-07 | 7.21E-07 |
| PAQR7       | 24.04133847 | 7.993242147 | -1.588664519 | 1.20E-41 | 4.10E-39 |
| AC022400.4  | 0.111495531 | 0.293373839 | 1.395754337  | 3.69E-07 | 5.95E-07 |
| AC012651.1  | 0.152596748 | 0.542478263 | 1.829841114  | 6.26E-15 | 1.63E-14 |
| SLC15A2     | 6.131489517 | 0.749574899 | -3.032093041 | 7.75E-40 | 1.01E-37 |
| EGLN3-AS1   | 0.010421138 | 0.280675426 | 4.751317974  | 2.40E-23 | 1.14E-22 |
| AL390879.1  | 0.297520518 | 0.801580617 | 1.429858459  | 7.05E-23 | 3.23E-22 |
| OR51E2      | 0.253898779 | 1.216764734 | 2.260724882  | 4.56E-24 | 2.30E-23 |
| BCO1        | 1.194116639 | 3.607608036 | 1.595098836  | 1.91E-20 | 7.29E-20 |
| N4BP2L2-IT2 | 0.146033703 | 0.772945436 | 2.404065209  | 1.96E-27 | 1.31E-26 |
| HTRA4       | 0.026596515 | 0.773371221 | 4.861851933  | 8.95E-39 | 6.89E-37 |
| AC007216.4  | 0.146962967 | 0.409994786 | 1.480152908  | 7.05E-14 | 1.72E-13 |

Table S1. The differentially expressed genes(DEGs) were screened out in TCGA

| ID         | conMean     | treatMean   | logFC        | pValue      | FDR         |
|------------|-------------|-------------|--------------|-------------|-------------|
| CACNA1F    | 0.062106309 | 0.302419122 | 2.283737639  | 5.93E-18    | 1.89E-17    |
| RPL26P6    | 0.531248247 | 1.310747938 | 1.302932196  | 8.55E-16    | 2.36E-15    |
| C19orf38   | 0.843918336 | 2.018322889 | 1.257981689  | 4.51E-22    | 1.94E-21    |
| GINS2      | 0.527853749 | 1.929898306 | 1.870314663  | 2.85E-34    | 5.18E-33    |
| TAS2R31    | 0.092076458 | 0.252236324 | 1.45387181   | 5.88E-08    | 9.95E-08    |
| AQP9       | 0.912599834 | 4.128871543 | 2.177693238  | 1.69E-16    | 4.89E-16    |
| IGHV3-71   | 0.149036959 | 0.508639373 | 1.770972998  | 0.006594405 | 0.007976828 |
| HIST1H2AE  | 1.329814042 | 4.227189301 | 1.668474204  | 2.40E-06    | 3.67E-06    |
| NPHP3      | 0.546880407 | 1.24187734  | 1.183225406  | 1.11E-21    | 4.62E-21    |
| ANGPTL3    | 11.02284145 | 3.314820816 | -1.733493375 | 2.96E-23    | 1.40E-22    |
| AC003984.1 | 0.236368805 | 1.190645968 | 2.332632946  | 2.89E-11    | 5.98E-11    |
| C11orf86   | 0.377785484 | 1.855436468 | 2.296119427  | 6.17E-05    | 8.60E-05    |
| RAB11FIP4  | 3.896452251 | 1.002758543 | -1.95818688  | 1.88E-39    | 2.00E-37    |
| RNU6-638P  | 0.185216857 | 0.659679576 | 1.832550033  | 0.000142388 | 0.000193856 |
| AC009974.1 | 0.149144972 | 0.553979095 | 1.893116198  | 3.59E-17    | 1.09E-16    |
| MZB1       | 1.137554077 | 5.015647031 | 2.140500694  | 3.30E-08    | 5.68E-08    |
| SNORD94    | 0.613890572 | 9.947254898 | 4.018245028  | 2.81E-19    | 9.83E-19    |
| SLC25A35   | 3.426801074 | 1.130561837 | -1.599822542 | 9.09E-37    | 3.40E-35    |
| RASAL3     | 0.619171098 | 4.023561188 | 2.700062937  | 8.02E-38    | 4.39E-36    |
| AC016722.2 | 0.087689023 | 0.25058467  | 1.514830002  | 1.58E-14    | 4.02E-14    |
| NMB        | 4.496406361 | 26.26324022 | 2.54620059   | 1.59E-31    | 1.74E-30    |
| COLGALT1   | 8.855732306 | 29.15959154 | 1.719286993  | 4.73E-37    | 1.95E-35    |
| AP000844.2 | 0.026764018 | 0.587040146 | 4.455092555  | 1.45E-16    | 4.20E-16    |
| TSHR       | 0.046037775 | 0.251863624 | 2.451752769  | 2.01E-23    | 9.66E-23    |
| SEL1L3     | 6.965037833 | 22.26376404 | 1.676494429  | 1.79E-28    | 1.34E-27    |
| LINC01789  | 0.237053931 | 2.248996411 | 3.245994138  | 4.17E-15    | 1.10E-14    |
| OGFR-AS1   | 0.148351809 | 0.385462182 | 1.377566803  | 3.70E-15    | 9.80E-15    |
| HK3        | 0.300916402 | 1.835402138 | 2.608661545  | 6.24E-34    | 1.06E-32    |
| GAPDHP60   | 0.12034672  | 0.311475617 | 1.371922411  | 1.40E-19    | 5.00E-19    |
| ABTB2      | 9.307763861 | 2.96728645  | -1.649290404 | 7.03E-33    | 9.77E-32    |
| MIR378J    | 0.356172236 | 0.84780507  | 1.251157533  | 1.60E-07    | 2.64E-07    |
| AC090164.2 | 0.014076668 | 0.261995536 | 4.218164453  | 5.84E-23    | 2.69E-22    |
| NPY5R      | 1.490346287 | 0.283573824 | -2.393851313 | 8.53E-37    | 3.24E-35    |
| SNORD13E   | 0.138778947 | 0.324206264 | 1.224123244  | 0.0031541   | 0.003907842 |
| GPR4       | 4.896542583 | 18.8594624  | 1.945453216  | 4.68E-28    | 3.34E-27    |
| SNHG4      | 0.220817588 | 0.506311716 | 1.197170784  | 1.52E-12    | 3.41E-12    |
| RNU6-689P  | 0.201123263 | 0.622534452 | 1.630073723  | 6.33E-09    | 1.14E-08    |
| AL031429.1 | 1.186410315 | 0.402810612 | -1.558429451 | 1.86E-27    | 1.25E-26    |
| NPNT       | 36.50304207 | 9.270894031 | -1.977236324 | 1.14E-30    | 1.11E-29    |
| Z95152.1   | 0.093286801 | 0.25916546  | 1.474128585  | 2.77E-06    | 4.22E-06    |
| AF064858.1 | 0.218331442 | 1.656994642 | 2.923977124  | 1.01E-20    | 3.92E-20    |
| AK7        | 2.556986644 | 0.904119979 | -1.499858486 | 1.27E-31    | 1.41E-30    |
| DEF6       | 1.186172283 | 5.79958666  | 2.289636516  | 8.38E-34    | 1.40E-32    |
| F2         | 0.225922261 | 2.47904949  | 3.455888738  | 3.47E-12    | 7.63E-12    |
| AC112220.2 | 2.461206015 | 1.167221631 | -1.076286899 | 6.85E-33    | 9.56E-32    |
| C19orf33   | 8.927035264 | 47.67551722 | 2.41699556   | 2.81E-20    | 1.06E-19    |
| RNU6-969P  | 0.066501437 | 0.249659715 | 1.908505624  | 0.00212271  | 0.002663316 |
| AC078864.1 | 1.264192232 | 9.301077437 | 2.879181993  | 8.13E-27    | 5.17E-26    |
| RNU1-22P   | 0.067135909 | 0.220395214 | 1.714936366  | 5.99E-07    | 9.51E-07    |
| AL021707.1 | 0.103823628 | 0.347080997 | 1.741137579  | 2.82E-14    | 7.06E-14    |
| AP005131.2 | 0.084327603 | 0.345269043 | 2.033644142  | 7.64E-17    | 2.26E-16    |
| AC063965.1 | 0.111036948 | 0.705899427 | 2.668422829  | 2.30E-17    | 7.06E-17    |
| CD82       | 25.91812381 | 9.414445216 | -1.461013301 | 6.32E-16    | 1.76E-15    |
| AC025423.1 | 0.058959054 | 0.264217215 | 2.16393919   | 2.28E-09    | 4.22E-09    |
| AC106028.3 | 0.127531214 | 0.269299096 | 1.078358983  | 5.42E-10    | 1.04E-09    |



Table S1. The differentially expressed genes(DEGs) were screened out in TCGA

| ID         | conMean     | treatMean   | logFC        | pValue      | FDR         |
|------------|-------------|-------------|--------------|-------------|-------------|
| FAM169A    | 2.59635319  | 0.288669016 | -3.168998478 | 1.41E-38    | 1.01E-36    |
| BHLHE41    | 5.679504139 | 38.34068989 | 2.755039414  | 1.19E-35    | 3.05E-34    |
| CSNK1E     | 7.571308292 | 16.32324537 | 1.108313403  | 1.42E-33    | 2.25E-32    |
| CYP26B1    | 4.758004643 | 1.56253881  | -1.606464656 | 1.39E-25    | 7.98E-25    |
| AC105020.1 | 0.103422968 | 1.258347583 | 3.604901961  | 3.08E-35    | 7.11E-34    |
| COL27A1    | 1.674292196 | 5.849796132 | 1.804835019  | 1.22E-25    | 7.05E-25    |
| AC008764.6 | 0.158822782 | 0.479355328 | 1.593677599  | 8.50E-20    | 3.09E-19    |
| PTPRC      | 2.958021914 | 10.97800215 | 1.891910882  | 1.70E-24    | 8.89E-24    |
| AC016582.3 | 1.895043181 | 0.929078405 | -1.028358466 | 1.03E-19    | 3.74E-19    |
| TMEM207    | 10.33718361 | 0.036153342 | -8.159498463 | 6.98E-58    | 2.05E-54    |
| TUBB2B     | 6.639621743 | 1.075469071 | -2.626135018 | 1.77E-35    | 4.36E-34    |
| AL049555.1 | 3.540425111 | 0.370257527 | -3.257321632 | 5.29E-36    | 1.50E-34    |
| AC027559.1 | 0.523698049 | 1.824900066 | 1.801010328  | 2.74E-28    | 2.01E-27    |
| AC099548.2 | 0.119738382 | 0.386389367 | 1.690169716  | 1.27E-29    | 1.08E-28    |
| TRBV3-1    | 0.200870173 | 1.049109697 | 2.384830274  | 2.68E-19    | 9.37E-19    |
| AC005041.3 | 0.172677064 | 0.583222112 | 1.755968947  | 1.55E-31    | 1.70E-30    |
| UGT2B11    | 0.125563487 | 0.286072059 | 1.187961595  | 0.00137201  | 0.001748387 |
| CCL23      | 1.164984526 | 0.425394819 | -1.453436424 | 3.04E-14    | 7.58E-14    |
| AC104534.1 | 0.252252502 | 0.950528673 | 1.913861567  | 1.81E-15    | 4.90E-15    |
| SIX1       | 0.08427676  | 0.452755343 | 2.425524915  | 9.31E-32    | 1.06E-30    |
| LMX1B      | 1.775058821 | 0.10747216  | -4.045831939 | 2.51E-23    | 1.19E-22    |
| TMEM14EP   | 0.015075859 | 0.30137928  | 4.321268081  | 1.12E-05    | 1.65E-05    |
| LZTS1      | 1.570720407 | 8.352466607 | 2.41077591   | 1.22E-32    | 1.64E-31    |
| ANXA3      | 8.501242389 | 2.065835753 | -2.04094814  | 1.24E-31    | 1.38E-30    |
| NUF2       | 0.191138972 | 0.74719425  | 1.96686139   | 1.24E-33    | 1.98E-32    |
| GALNT16    | 1.788341536 | 0.875946169 | -1.029708171 | 1.67E-18    | 5.53E-18    |
| AC002553.1 | 0.484196907 | 1.375797734 | 1.506602616  | 2.07E-18    | 6.81E-18    |
| AC117498.2 | 1.43587889  | 0.329297942 | -2.12446867  | 4.95E-35    | 1.09E-33    |
| AL645608.1 | 0.101781727 | 0.217419661 | 1.095003836  | 6.22E-06    | 9.26E-06    |
| CYP51A1P2  | 0.061836636 | 0.237276212 | 1.940033724  | 3.17E-22    | 1.38E-21    |
| CCNL2      | 3.985122583 | 14.25868958 | 1.839145392  | 7.27E-20    | 2.66E-19    |
| RPS15AP6   | 0.026806154 | 0.229122486 | 3.095482888  | 4.91E-12    | 1.07E-11    |
| BNIP3      | 18.27417681 | 54.27520146 | 1.570486757  | 5.11E-30    | 4.57E-29    |
| AC087482.1 | 3.536526086 | 14.45827188 | 2.031490317  | 1.04E-21    | 4.36E-21    |
| AL360181.1 | 0.225065234 | 0.599871432 | 1.414310109  | 1.05E-06    | 1.65E-06    |
| AL161909.1 | 0.216490828 | 0.438656755 | 1.01878658   | 1.24E-07    | 2.06E-07    |
| AC104463.2 | 0.134375838 | 0.44707214  | 1.734233888  | 1.44E-10    | 2.85E-10    |
| UBE2C      | 0.822440413 | 6.01320007  | 2.870149899  | 7.78E-35    | 1.62E-33    |
| AL031717.1 | 0.122615147 | 0.591304273 | 2.269763488  | 2.41E-19    | 8.46E-19    |
| NPTN-IT1   | 0.198570018 | 0.607257592 | 1.612660817  | 3.49E-12    | 7.67E-12    |
| VN1R84P    | 0.112471969 | 0.246153115 | 1.129990514  | 0.010264816 | 0.012230571 |
| AC007376.2 | 0.111342407 | 0.267628801 | 1.265230198  | 5.10E-11    | 1.04E-10    |
| MCTP2      | 0.857558938 | 2.128782752 | 1.311720994  | 1.21E-28    | 9.23E-28    |
| AC105118.1 | 0.022909954 | 0.282846104 | 3.62597083   | 4.69E-07    | 7.50E-07    |
| AC018766.1 | 0.122396923 | 0.295118461 | 1.269726876  | 7.59E-05    | 0.000105223 |
| HIST1H2AM  | 0.086024004 | 0.588016089 | 2.773044447  | 4.55E-21    | 1.81E-20    |
| AC025459.1 | 0.093038716 | 0.279603475 | 1.587479195  | 2.20E-08    | 3.83E-08    |
| SLC43A3    | 2.669088651 | 7.836844108 | 1.553925575  | 3.97E-28    | 2.86E-27    |
| RNU6-834P  | 0.153989256 | 0.377288884 | 1.292839903  | 4.27E-05    | 6.02E-05    |
| GPR82      | 0.120444171 | 0.526660157 | 2.128507751  | 7.59E-25    | 4.08E-24    |
| AL049612.1 | 0.125218466 | 0.326142816 | 1.38105652   | 5.98E-07    | 9.50E-07    |
| FBXL6      | 1.656425131 | 3.557525683 | 1.102801176  | 6.55E-24    | 3.25E-23    |
| RPL21P123  | 0.030359801 | 0.234279826 | 2.947998495  | 8.11E-13    | 1.86E-12    |
| SLC6A1-AS1 | 0.062080255 | 0.38010067  | 2.614175168  | 4.09E-19    | 1.41E-18    |
| AP005899.1 | 0.151139008 | 0.820445992 | 2.440532312  | 3.40E-27    | 2.24E-26    |

Table S1. The differentially expressed genes(DEGs) were screened out in TCGA

| ID         | conMean     | treatMean   | logFC        | pValue      | FDR         |
|------------|-------------|-------------|--------------|-------------|-------------|
| AC136428.1 | 0.102453534 | 0.415324522 | 2.019269304  | 0.007261453 | 0.008758497 |
| ALDOA      | 158.1132872 | 333.2219371 | 1.07552477   | 2.79E-32    | 3.47E-31    |
| RNU6-882P  | 0.30552245  | 0.755742728 | 1.306616798  | 2.63E-06    | 4.01E-06    |
| LINCMD1    | 0.122562657 | 0.538764447 | 2.136135178  | 7.07E-12    | 1.52E-11    |
| AC011815.3 | 0.325129649 | 1.117828123 | 1.781611348  | 1.91E-18    | 6.28E-18    |
| SLC36A2    | 16.97225293 | 0.714666882 | -4.569763338 | 1.16E-17    | 3.61E-17    |
| TRBV6-6    | 0.108635302 | 0.675095226 | 2.635598024  | 3.66E-19    | 1.27E-18    |
| LINC00989  | 0.268249996 | 0.67486527  | 1.331021362  | 5.72E-14    | 1.40E-13    |
| OSM        | 0.525026197 | 1.919826635 | 1.870514724  | 9.11E-15    | 2.35E-14    |
| MACROD1    | 14.06170969 | 6.90449152  | -1.026164939 | 1.43E-21    | 5.91E-21    |
| AC011466.1 | 0.095968483 | 0.243341932 | 1.342352343  | 1.00E-10    | 2.01E-10    |
| L2HGDH     | 4.625866342 | 1.803637072 | -1.358814514 | 1.76E-30    | 1.67E-29    |
| CLDN4      | 49.91557688 | 21.58078602 | -1.209742688 | 1.08E-13    | 2.61E-13    |
| AL121987.2 | 0.068106159 | 0.234777903 | 1.785439457  | 9.19E-22    | 3.86E-21    |
| RNU6-130P  | 0.103222025 | 0.37507676  | 1.86143504   | 0.000607808 | 0.000792598 |
| ZNF692     | 1.508794296 | 5.382348191 | 1.834839597  | 1.82E-26    | 1.12E-25    |
| ANK1       | 0.244951047 | 1.192060163 | 2.282891686  | 6.57E-13    | 1.51E-12    |
| AC108474.1 | 0.045911949 | 0.288005497 | 2.649154757  | 4.38E-07    | 7.03E-07    |
| DCDC2B     | 0.060301009 | 0.23508126  | 1.962905484  | 2.37E-13    | 5.60E-13    |
| 4-Mar      | 0.054037708 | 0.36762737  | 2.7662058    | 6.87E-29    | 5.39E-28    |
| UTAT33     | 0.156211549 | 0.399221669 | 1.35368891   | 6.00E-12    | 1.30E-11    |
| CECR7      | 0.747218885 | 0.273513895 | -1.449916793 | 4.65E-18    | 1.49E-17    |
| NXPH4      | 0.631326212 | 11.81941047 | 4.226628618  | 1.77E-36    | 5.83E-35    |
| JAML       | 0.704410566 | 2.284856423 | 1.697615058  | 2.38E-25    | 1.33E-24    |
| SPDYA      | 0.075396623 | 0.249306077 | 1.725346245  | 1.64E-17    | 5.07E-17    |
| PLEKHG3    | 7.362809597 | 3.651941473 | -1.011592749 | 1.03E-29    | 8.86E-29    |
| GABRE      | 0.390434599 | 3.042250423 | 2.961986102  | 1.14E-24    | 6.05E-24    |
| LINC00884  | 0.441169488 | 0.889932169 | 1.012362364  | 9.65E-13    | 2.20E-12    |
| AC007406.3 | 0.325605199 | 3.523161651 | 3.435675028  | 2.81E-37    | 1.26E-35    |
| CD44       | 7.405462972 | 19.1090518  | 1.367594356  | 2.19E-18    | 7.19E-18    |
| ILDR1      | 10.87732019 | 2.614332423 | -2.056808667 | 2.18E-37    | 1.02E-35    |
| ARMH1      | 0.172167801 | 0.35179813  | 1.030932458  | 4.12E-07    | 6.61E-07    |
| AP000866.6 | 0.174191518 | 0.522762081 | 1.58548012   | 1.32E-10    | 2.63E-10    |
| DUSP4      | 0.711342711 | 2.673226358 | 1.909965309  | 2.20E-29    | 1.82E-28    |
| AC233728.1 | 0.234389245 | 0.505538677 | 1.108915098  | 1.53E-06    | 2.37E-06    |
| MFSD4A     | 81.5697549  | 2.037774673 | -5.322967878 | 3.52E-39    | 3.26E-37    |
| IGHV2-26   | 1.17714612  | 7.622778442 | 2.69502353   | 7.49E-05    | 0.000103947 |
| GLB1L      | 7.009834222 | 15.96044265 | 1.187048433  | 2.89E-19    | 1.01E-18    |
| AC027601.2 | 0.223624711 | 0.666671988 | 1.575897493  | 1.32E-15    | 3.61E-15    |
| HIST1H2AI  | 0.129501403 | 1.287822075 | 3.313893652  | 2.88E-23    | 1.36E-22    |
| FMNL3      | 3.082178417 | 7.601080847 | 1.302254203  | 9.17E-30    | 7.93E-29    |
| AC138956.2 | 0.50321061  | 1.650622201 | 1.713775705  | 7.23E-17    | 2.14E-16    |
| RPL10P12   | 0.079287135 | 0.376699495 | 2.248255394  | 2.87E-13    | 6.74E-13    |
| HMGA1P2    | 0.190026786 | 0.429516857 | 1.176511962  | 1.36E-07    | 2.25E-07    |
| M1AP       | 0.922131493 | 0.271860063 | -1.762108257 | 5.25E-15    | 1.38E-14    |
| SCNN1G     | 63.76658065 | 2.217129484 | -4.846035588 | 2.39E-41    | 7.04E-39    |
| GPD1L      | 18.81618064 | 6.675052335 | -1.495122762 | 1.23E-35    | 3.15E-34    |
| ANKRD19P   | 0.219765113 | 0.482913197 | 1.135801513  | 1.81E-21    | 7.47E-21    |
| CCL20      | 3.115283676 | 17.81231427 | 2.515439526  | 1.17E-18    | 3.89E-18    |
| ITPRIPL1   | 0.168101055 | 0.588772803 | 1.808382251  | 1.99E-32    | 2.56E-31    |
| ANO7       | 0.301949409 | 0.67476031  | 1.160068269  | 4.23E-28    | 3.04E-27    |
| ATP1A1     | 684.389025  | 98.81102022 | -2.792072767 | 7.64E-42    | 2.82E-39    |
| WDR72      | 25.78748292 | 7.343593324 | -1.812112888 | 1.36E-29    | 1.16E-28    |
| MT1H       | 93.20017893 | 4.531718349 | -4.362202621 | 1.49E-28    | 1.13E-27    |
| SLC9A2     | 4.189831609 | 0.463075474 | -3.177573007 | 9.79E-37    | 3.59E-35    |

Table S1. The differentially expressed genes(DEGs) were screened out in TCGA

| ID         | conMean     | treatMean   | logFC        | pValue      | FDR         |
|------------|-------------|-------------|--------------|-------------|-------------|
| SCARA5     | 0.903456468 | 0.242767964 | -1.895877037 | 3.98E-16    | 1.12E-15    |
| PPM1H      | 9.595256125 | 2.545904381 | -1.914143081 | 2.21E-35    | 5.30E-34    |
| RNA5SP82   | 0.455530874 | 1.507539396 | 1.726574963  | 3.85E-14    | 9.54E-14    |
| AC020915.2 | 0.373869023 | 0.957978934 | 1.35746099   | 2.89E-11    | 5.99E-11    |
| AC112496.1 | 0.192407958 | 0.58044059  | 1.592979942  | 1.88E-11    | 3.95E-11    |
| NECTIN4    | 2.119452682 | 0.550493021 | -1.944895577 | 2.69E-33    | 4.04E-32    |
| ALDH4A1    | 68.44591693 | 16.63498608 | -2.040743823 | 5.93E-19    | 2.02E-18    |
| CLEC4E     | 0.929858017 | 2.397608152 | 1.366513546  | 2.07E-12    | 4.62E-12    |
| TSPAN18    | 8.240333736 | 21.20830382 | 1.363854569  | 4.21E-21    | 1.69E-20    |
| AC108471.1 | 0.02158927  | 0.256179994 | 3.568771465  | 5.41E-06    | 8.09E-06    |
| KCNK17     | 0.065368599 | 0.594725957 | 3.185555357  | 3.56E-15    | 9.44E-15    |
| LDHAP7     | 1.107217825 | 2.863830586 | 1.371007076  | 7.58E-10    | 1.44E-09    |
| BTK        | 0.541992096 | 2.527741105 | 2.221504991  | 3.60E-33    | 5.30E-32    |
| SEMA3B-AS1 | 16.09514734 | 0.821448215 | -2.891419562 | 1.08E-36    | 3.89E-35    |
| ADAMTS12   | 0.347625869 | 0.882727793 | 1.344433175  | 3.96E-10    | 7.65E-10    |
| TLN2       | 11.85082897 | 5.583016619 | -1.085871224 | 3.92E-26    | 2.36E-25    |
| FNDC5      | 0.774011932 | 0.291229421 | -1.410199697 | 1.04E-29    | 8.93E-29    |
| LINC02294  | 8.955562275 | 2.121126305 | -2.077953484 | 2.01E-11    | 4.20E-11    |
| SLC16A10   | 1.837978289 | 0.648523139 | -1.50288977  | 3.01E-28    | 2.20E-27    |
| CD44-AS1   | 0.069181285 | 0.302843995 | 2.130121082  | 4.75E-10    | 9.13E-10    |
| SNORD63    | 0.362167521 | 1.54759488  | 2.095298784  | 6.49E-14    | 1.59E-13    |
| RNA5SP345  | 0.090715111 | 0.224013528 | 1.304171071  | 0.000100288 | 0.000137897 |
| TP11P2     | 1.226154872 | 0.423937875 | -1.532216445 | 5.68E-33    | 8.03E-32    |
| AC010618.2 | 0.09451756  | 0.433380676 | 2.196980538  | 1.73E-15    | 4.69E-15    |
| ATP5MFP4   | 0.045101258 | 0.321704044 | 2.834494488  | 5.30E-15    | 1.39E-14    |
| AL365277.1 | 0.092717326 | 0.27327864  | 1.559461828  | 2.47E-06    | 3.77E-06    |
| RNY1P4     | 0.077964669 | 0.240111821 | 1.622814031  | 0.000638855 | 0.000831663 |
| B3GNT10    | 2.398240667 | 1.015292497 | -1.240081027 | 6.94E-31    | 6.93E-30    |
| ZNF395     | 9.711918181 | 61.92087754 | 2.672597745  | 9.34E-36    | 2.49E-34    |
| AC006272.1 | 0.036270779 | 0.25145554  | 2.793423683  | 1.37E-24    | 7.24E-24    |
| SCGB1B2P   | 0.42333294  | 1.035865268 | 1.290971712  | 4.10E-16    | 1.16E-15    |
| IGHV5-78   | 0.360377915 | 0.818904725 | 1.184185012  | 0.001326956 | 0.00169244  |
| RPL10AP6   | 0.870664519 | 1.959570828 | 1.170348881  | 2.71E-17    | 8.27E-17    |
| PCDH17     | 1.581885469 | 6.474528895 | 2.033130071  | 5.07E-26    | 3.02E-25    |
| MEGF6      | 1.356934558 | 3.394784563 | 1.322968877  | 1.11E-14    | 2.86E-14    |
| ZAP70      | 0.24077723  | 1.853038361 | 2.944121876  | 4.11E-34    | 7.30E-33    |
| AC022113.1 | 0.084365464 | 0.237215212 | 1.491472091  | 2.47E-09    | 4.57E-09    |
| MIR4257    | 0.038086649 | 0.396021823 | 3.378222681  | 5.07E-12    | 1.10E-11    |
| TRBV6-1    | 0.15718123  | 0.85341478  | 2.440818147  | 6.70E-20    | 2.46E-19    |
| SLC9A9     | 1.806797042 | 6.365325386 | 1.816799808  | 5.19E-28    | 3.68E-27    |
| MYH3       | 0.168088951 | 0.469186646 | 1.480937055  | 3.96E-13    | 9.23E-13    |
| MYO1F      | 0.810584683 | 4.694881575 | 2.534053948  | 1.29E-36    | 4.52E-35    |
| ADCY7      | 0.313740974 | 1.251110423 | 1.995563267  | 1.74E-24    | 9.08E-24    |
| CYP3A4     | 0.6968827   | 0.275412893 | -1.339319743 | 1.47E-05    | 2.14E-05    |
| ANKRD45    | 1.180298568 | 0.486159791 | -1.279649369 | 7.97E-26    | 4.67E-25    |
| AC100830.2 | 0.236398046 | 0.99661949  | 2.075824676  | 1.22E-17    | 3.80E-17    |
| AC119396.1 | 0.134364075 | 0.319927322 | 1.251596744  | 1.79E-13    | 4.25E-13    |
| NSUN5P2    | 0.188970961 | 0.475010263 | 1.329794134  | 1.47E-08    | 2.58E-08    |
| ACOT11     | 4.084562972 | 1.04262638  | -1.969959458 | 1.24E-36    | 4.35E-35    |
| IGHV3-63   | 0.150805915 | 0.391706833 | 1.377081284  | 0.00205299  | 0.002578511 |
| AC136604.2 | 0.075976137 | 0.364630913 | 2.262818607  | 1.94E-22    | 8.57E-22    |
| RN7SL481P  | 0.11636316  | 0.494376254 | 2.086975073  | 2.44E-15    | 6.55E-15    |
| SSBP3-AS1  | 0.110795454 | 0.257985453 | 1.21939103   | 2.55E-10    | 4.99E-10    |
| AC007349.1 | 0.181622348 | 0.514545983 | 1.502358279  | 0.000144688 | 0.000196921 |
| AC005703.6 | 0.084068749 | 0.288222238 | 1.777540136  | 2.55E-30    | 2.37E-29    |

Table S1. The differentially expressed genes(DEGs) were screened out in TCGA

| ID         | conMean     | treatMean   | logFC        | pValue      | FDR         |
|------------|-------------|-------------|--------------|-------------|-------------|
| C19orf18   | 0.34716265  | 0.710780652 | 1.033792671  | 3.58E-08    | 6.14E-08    |
| EMP3       | 12.27501342 | 39.12582339 | 1.672396512  | 3.42E-32    | 4.18E-31    |
| DEPTOR     | 31.59801042 | 10.66494454 | -1.566957258 | 4.61E-40    | 6.87E-38    |
| AC239859.6 | 0.662986087 | 2.607382667 | 1.975551833  | 6.32E-17    | 1.87E-16    |
| AC011479.2 | 0.052126083 | 0.2685893   | 2.365324482  | 5.12E-18    | 1.64E-17    |
| IGLV7-46   | 2.072737913 | 30.89589622 | 3.897805611  | 1.36E-06    | 2.11E-06    |
| AL391427.1 | 0.192073715 | 0.391172674 | 1.026145489  | 1.43E-05    | 2.08E-05    |
| AC232271.1 | 0.33276802  | 0.906635768 | 1.446006283  | 4.86E-14    | 1.20E-13    |
| AC133134.1 | 0.119263263 | 0.321258513 | 1.429584967  | 5.78E-12    | 1.25E-11    |
| ST6GALNAC  | 0.168335711 | 0.505284119 | 1.585753577  | 1.91E-16    | 5.50E-16    |
| AC097372.3 | 0.143939511 | 0.33151334  | 1.203604264  | 9.92E-05    | 0.000136409 |
| RNU6-652P  | 0.307088585 | 1.120865049 | 1.867885796  | 3.43E-10    | 6.66E-10    |
| NACAP8     | 1.336140896 | 0.446838355 | -1.580247216 | 3.05E-24    | 1.56E-23    |
| AL450384.1 | 0.081069558 | 0.349933559 | 2.109848855  | 3.21E-15    | 8.53E-15    |
| S100A12    | 0.65134735  | 1.634756885 | 1.327577085  | 1.50E-08    | 2.64E-08    |
| SIGLEC8    | 0.134383141 | 2.851051209 | 4.407069888  | 4.56E-40    | 6.86E-38    |
| FTH1P10    | 0.164690203 | 0.351921696 | 1.095499722  | 4.06E-13    | 9.47E-13    |
| AD000864.1 | 0.08821762  | 0.337801391 | 1.937036524  | 1.51E-30    | 1.44E-29    |
| ABHD11-AS1 | 0.579551177 | 3.120356187 | 2.428702754  | 2.61E-25    | 1.46E-24    |
| CXCR2      | 0.247007653 | 0.498153889 | 1.012035743  | 1.48E-09    | 2.77E-09    |
| NRM        | 4.844230958 | 10.11481593 | 1.06213051   | 1.34E-26    | 8.36E-26    |
| AC148477.4 | 5.974009204 | 0.803677613 | -2.89401066  | 2.37E-34    | 4.39E-33    |
| SPRY4      | 9.079185681 | 22.37826269 | 1.301463227  | 1.22E-21    | 5.07E-21    |
| HSD17B7    | 1.106739867 | 3.497367602 | 1.659953279  | 2.48E-32    | 3.13E-31    |
| RPL17P50   | 1.064843056 | 3.543465949 | 1.734520375  | 1.14E-35    | 2.94E-34    |
| LINC00924  | 6.000021076 | 2.21591726  | -1.437063555 | 6.24E-22    | 2.66E-21    |
| AL158166.1 | 0.192879231 | 0.553920296 | 1.521980595  | 2.90E-21    | 1.17E-20    |
| BSND       | 15.37960198 | 1.253583121 | -3.616888602 | 9.80E-40    | 1.24E-37    |
| LAMA4      | 2.583336629 | 16.39142372 | 2.665633613  | 1.56E-36    | 5.28E-35    |
| LCP1       | 9.375988889 | 33.71652484 | 1.84641308   | 1.98E-26    | 1.22E-25    |
| AC131391.1 | 0.059004207 | 0.234061949 | 1.988000682  | 0.00913695  | 0.010935445 |
| PCDH12     | 5.11562576  | 11.78776364 | 1.204307407  | 5.76E-16    | 1.61E-15    |
| FAM118A    | 1.212160097 | 2.649837352 | 1.128323553  | 6.13E-20    | 2.25E-19    |
| AC147651.3 | 0.555321331 | 2.88380415  | 2.376578471  | 3.13E-35    | 7.19E-34    |
| AC108673.2 | 0.391170011 | 0.909587234 | 1.217416236  | 2.44E-23    | 1.16E-22    |
| CXorf65    | 0.032662397 | 0.371218888 | 3.506567554  | 5.73E-26    | 3.39E-25    |
| IGKV1OR2-6 | 0.204450282 | 0.831447206 | 2.02387461   | 0.00564961  | 0.006867461 |
| AL139807.1 | 0.092183212 | 0.297407349 | 1.689864362  | 0.000420652 | 0.000554548 |
| RNU6-339P  | 0.278813563 | 4.039082535 | 3.856654975  | 1.36E-30    | 1.31E-29    |
| ABCB4      | 0.195752971 | 0.864833787 | 2.14338868   | 2.19E-18    | 7.19E-18    |
| LINC01788  | 1.625362352 | 0.428770051 | -1.922485337 | 2.63E-26    | 1.61E-25    |
| FAM78A     | 0.573603294 | 3.025175948 | 2.398893839  | 1.88E-37    | 8.99E-36    |
| EGR2       | 9.535756329 | 4.33014458  | -1.138932174 | 7.85E-05    | 0.000108689 |
| SH3BGR     | 6.136889264 | 2.724504117 | -1.17151388  | 2.43E-36    | 7.58E-35    |
| AC004847.1 | 0.11487841  | 0.917831515 | 2.998121655  | 2.53E-33    | 3.82E-32    |
| SCARNA22   | 0.03139024  | 0.473814912 | 3.91593566   | 1.73E-10    | 3.42E-10    |
| AC018638.2 | 4.187503931 | 11.82688941 | 1.497908231  | 3.39E-21    | 1.37E-20    |
| FAM49A     | 1.325616379 | 3.935572954 | 1.56991035   | 5.67E-29    | 4.49E-28    |
| FOXS1      | 1.948901399 | 5.715997555 | 1.552344198  | 1.21E-15    | 3.32E-15    |
| IGHV4-34   | 4.934541898 | 27.00094745 | 2.452021969  | 9.99E-06    | 1.47E-05    |
| HCG4B      | 0.435287967 | 1.790990774 | 2.040715863  | 9.38E-20    | 3.40E-19    |
| AC009053.3 | 1.313678207 | 3.613814907 | 1.459910693  | 1.67E-11    | 3.52E-11    |
| AL591468.1 | 0.014541152 | 0.282896719 | 4.28206202   | 1.82E-22    | 8.08E-22    |
| AC026462.3 | 2.202735956 | 0.421615756 | -2.385295881 | 6.99E-34    | 1.18E-32    |

Table S2. The immune-related DEGs were screened out in TCGA

| ID       | conMean     | treatMean   | logFC        | pValue   | FDR      |
|----------|-------------|-------------|--------------|----------|----------|
| AZGP1    | 41.87893129 | 12.40667375 | -1.755108248 | 2.04E-06 | 3.13E-06 |
| B2M      | 435.5191014 | 1104.585561 | 1.342697274  | 2.53E-33 | 3.82E-32 |
| CD1A     | 0.039832605 | 0.278854276 | 2.807489666  | 3.80E-14 | 9.43E-14 |
| CD1D     | 0.860631723 | 4.193998054 | 2.284858267  | 3.95E-36 | 1.15E-34 |
| CD4      | 6.587828292 | 23.21248573 | 1.817026166  | 2.33E-30 | 2.17E-29 |
| CD8A     | 0.902661944 | 11.31597051 | 3.648030728  | 7.87E-32 | 9.04E-31 |
| CD8B     | 0.386198107 | 4.244911035 | 3.45832132   | 2.84E-29 | 2.33E-28 |
| CD74     | 419.7033403 | 1411.712739 | 1.750004703  | 1.32E-30 | 1.27E-29 |
| CTSE     | 0.268338036 | 1.576072224 | 2.554210179  | 4.03E-07 | 6.47E-07 |
| CTSS     | 10.84665618 | 41.53150929 | 1.936955946  | 2.94E-29 | 2.40E-28 |
| FCER1G   | 9.167727556 | 53.05744517 | 2.532919132  | 2.30E-36 | 7.23E-35 |
| HLA-A    | 258.0919347 | 835.7994612 | 1.69527177   | 4.97E-38 | 2.96E-36 |
| HLA-B    | 290.8432708 | 1113.972107 | 1.937399279  | 1.20E-39 | 1.42E-37 |
| HLA-C    | 265.9387185 | 677.5405253 | 1.349213403  | 1.28E-32 | 1.71E-31 |
| HLA-DMA  | 20.48890526 | 57.94869739 | 1.499933329  | 3.00E-30 | 2.76E-29 |
| HLA-DMB  | 8.848303875 | 18.98307058 | 1.101240534  | 1.11E-16 | 3.24E-16 |
| HLA-DOA  | 8.590774556 | 23.0765818  | 1.425569424  | 3.07E-14 | 7.66E-14 |
| HLA-DOB  | 0.636122774 | 2.937564404 | 2.20724334   | 2.20E-20 | 8.32E-20 |
| HLA-DPA1 | 33.19723619 | 121.3011518 | 1.869458208  | 1.23E-27 | 8.40E-27 |
| HLA-DPB1 | 44.02344333 | 186.7294374 | 2.084605486  | 7.30E-32 | 8.46E-31 |
| HLA-DQA1 | 8.914367764 | 42.15292427 | 2.241428333  | 2.25E-28 | 1.66E-27 |
| HLA-DQA2 | 7.124018247 | 39.21800228 | 2.460752932  | 6.66E-14 | 1.63E-13 |
| HLA-DQB1 | 14.35841368 | 71.73125957 | 2.320705595  | 4.98E-30 | 4.46E-29 |
| HLA-DRA  | 343.1340806 | 1147.741158 | 1.741952989  | 6.26E-28 | 4.41E-27 |
| HLA-DRB1 | 205.239071  | 640.0057864 | 1.640779549  | 4.50E-28 | 3.23E-27 |
| HLA-DRB5 | 82.19951569 | 212.7735843 | 1.372117253  | 1.20E-14 | 3.07E-14 |
| HLA-E    | 232.7418903 | 492.7907821 | 1.082244371  | 6.66E-31 | 6.67E-30 |
| HLA-F    | 6.785350208 | 37.5298872  | 2.46754477   | 6.29E-40 | 8.58E-38 |
| HLA-G    | 1.676810196 | 24.47187207 | 3.867333171  | 2.77E-32 | 3.44E-31 |
| HLA-H    | 17.05623982 | 57.10324799 | 1.743273179  | 2.33E-32 | 2.96E-31 |
| HSPA2    | 52.34832846 | 3.354695578 | -3.963889711 | 2.22E-40 | 3.84E-38 |
| HSPA6    | 0.654532543 | 2.747032921 | 2.069337371  | 2.90E-31 | 3.06E-30 |
| ICAM1    | 11.38388336 | 29.8352402  | 1.390024607  | 7.81E-25 | 4.20E-24 |
| IFNG     | 0.033548735 | 0.770130505 | 4.520772651  | 6.90E-30 | 6.08E-29 |
| KIR2DL4  | 0.071827739 | 0.384075366 | 2.418776434  | 3.36E-28 | 2.44E-27 |
| KLRC1    | 0.061161691 | 0.233621995 | 1.933475905  | 1.68E-20 | 6.45E-20 |
| KLRD1    | 0.084454012 | 0.438419828 | 2.37607518   | 1.76E-36 | 5.78E-35 |
| LTA      | 0.091767198 | 0.577242079 | 2.653126016  | 1.06E-27 | 7.30E-27 |
| CIITA    | 1.230969225 | 3.498989709 | 1.507143727  | 2.29E-21 | 9.35E-21 |
| MICB     | 0.94848986  | 2.373876505 | 1.323540629  | 6.65E-29 | 5.23E-28 |
| PSMB8    | 23.5900901  | 72.09384719 | 1.61169521   | 1.60E-39 | 1.79E-37 |
| RELB     | 4.108267917 | 8.908311619 | 1.116621757  | 1.70E-26 | 1.05E-25 |
| TAP1     | 9.824433889 | 37.89533981 | 1.947574261  | 5.31E-39 | 4.45E-37 |
| TAP2     | 3.191248139 | 7.1862553   | 1.171119398  | 4.42E-29 | 3.55E-28 |
| TAPBP    | 27.74980472 | 84.23953798 | 1.602019905  | 2.87E-37 | 1.28E-35 |
| IFI30    | 0.192021464 | 0.970552    | 2.337537931  | 3.39E-26 | 2.05E-25 |

Table S2. The immune-related DEGs were screened out in TCGA

| ID       | conMean     | treatMean   | logFC        | pValue      | FDR         |
|----------|-------------|-------------|--------------|-------------|-------------|
| PROCR    | 9.636000347 | 28.80449262 | 1.579787495  | 2.03E-29    | 1.68E-28    |
| ERAP2    | 6.136530688 | 12.91520588 | 1.073575484  | 1.61E-07    | 2.66E-07    |
| ULBP2    | 0.562564232 | 1.14788055  | 1.028882787  | 9.77E-17    | 2.87E-16    |
| RAET1E   | 0.890929207 | 0.255746995 | -1.800593513 | 2.61E-16    | 7.43E-16    |
| PDIA2    | 0.03504275  | 0.332661282 | 3.246866049  | 0.00505491  | 0.006164218 |
| HAMP     | 0.042262231 | 0.565979605 | 3.74330925   | 2.84E-29    | 2.33E-28    |
| SLPI     | 166.7490311 | 48.27262438 | -1.788401211 | 1.44E-18    | 4.78E-18    |
| CXCL10   | 3.230415582 | 35.63265339 | 3.463408238  | 1.08E-31    | 1.21E-30    |
| CXCL9    | 2.611677277 | 32.86933179 | 3.653693587  | 4.37E-32    | 5.23E-31    |
| CXCL5    | 0.211824868 | 5.253037935 | 4.632208128  | 1.39E-10    | 2.77E-10    |
| CXCL11   | 0.435641105 | 5.137675006 | 3.55990364   | 1.24E-30    | 1.20E-29    |
| CXCL12   | 37.1814979  | 16.05792324 | -1.21129957  | 6.88E-22    | 2.92E-21    |
| CXCL13   | 0.265823874 | 5.028927296 | 4.241708112  | 1.86E-26    | 1.14E-25    |
| CXCL2    | 2.548180188 | 7.809354085 | 1.61573593   | 8.04E-08    | 1.35E-07    |
| PF4      | 0.194015017 | 0.417496776 | 1.105596737  | 0.000247616 | 0.000331853 |
| XCL1     | 0.196233068 | 1.000537621 | 2.350135332  | 2.24E-23    | 1.07E-22    |
| DEFB1    | 841.20163   | 207.3787319 | -2.020183702 | 1.15E-34    | 2.29E-33    |
| TMSB10   | 602.5835472 | 2548.010179 | 2.080137853  | 1.48E-35    | 3.71E-34    |
| LCN2     | 8.599858558 | 3.208513648 | -1.422407812 | 8.73E-21    | 3.41E-20    |
| LCN1     | 0.004005765 | 0.39145799  | 6.610636044  | 9.49E-23    | 4.30E-22    |
| S100A9   | 18.61200506 | 39.07580521 | 1.070042118  | 2.79E-10    | 5.44E-10    |
| S100A8   | 3.659235781 | 10.48543314 | 1.518772175  | 2.03E-15    | 5.48E-15    |
| S100A12  | 0.65134735  | 1.634756885 | 1.327577085  | 1.50E-08    | 2.64E-08    |
| CCR10    | 0.194860055 | 0.623353335 | 1.677611777  | 1.94E-22    | 8.57E-22    |
| PTGDS    | 37.2462633  | 15.73044518 | -1.243536195 | 3.82E-14    | 9.48E-14    |
| S100A2   | 44.94602435 | 3.644959574 | -3.62421879  | 4.13E-39    | 3.64E-37    |
| S100A5   | 0.95986352  | 0.320581968 | -1.582136007 | 1.95E-28    | 1.45E-27    |
| LMBR1L   | 2.073119292 | 5.576572156 | 1.427575455  | 1.29E-34    | 2.56E-33    |
| TMSB4Y   | 1.793387248 | 0.580927978 | -1.626255825 | 3.33E-10    | 6.46E-10    |
| S100A14  | 12.84185961 | 2.839144884 | -2.177325754 | 5.27E-35    | 1.15E-33    |
| ZC3HAV1L | 2.044624458 | 4.776817133 | 1.224213765  | 4.77E-20    | 1.77E-19    |
| WFIKKN1  | 0.320360779 | 0.771844669 | 1.268613005  | 1.40E-05    | 2.04E-05    |
| WFDC2    | 115.4656713 | 50.32470087 | -1.198125395 | 1.26E-22    | 5.63E-22    |
| TGFB1    | 14.84169029 | 43.80108268 | 1.561311124  | 8.28E-32    | 9.45E-31    |
| PF4V1    | 0.720211486 | 2.991160317 | 2.054212723  | 8.05E-10    | 1.53E-09    |
| MMP9     | 0.839206088 | 13.7903335  | 4.038488393  | 2.51E-25    | 1.40E-24    |
| APOBEC3G | 1.122554896 | 5.688964697 | 2.34138013   | 1.89E-35    | 4.60E-34    |
| FABP6    | 0.390912925 | 19.45977802 | 5.637504156  | 1.50E-38    | 1.05E-36    |
| NOD2     | 0.166210027 | 0.927548648 | 2.480415529  | 2.52E-31    | 2.68E-30    |
| TLR2     | 2.401574331 | 7.391895057 | 1.621963813  | 4.19E-27    | 2.73E-26    |
| PLAU     | 72.7867979  | 15.84399196 | -2.199740923 | 1.85E-25    | 1.05E-24    |
| PAEP     | 0.010618538 | 6.658253526 | 9.292414907  | 2.82E-13    | 6.64E-13    |
| NOX4     | 13.94177603 | 5.867594815 | -1.248573201 | 0.003417254 | 0.004223461 |
| FABP7    | 1.387057525 | 84.19427879 | 5.923622676  | 5.27E-37    | 2.14E-35    |
| FABP5    | 1.390030232 | 5.110482824 | 1.878343339  | 3.53E-28    | 2.56E-27    |
| OASL     | 1.068942564 | 3.167356973 | 1.567095137  | 7.52E-24    | 3.71E-23    |

Table S2. The immune-related DEGs were screened out in TCGA

| ID        | conMean     | treatMean   | logFC        | pValue      | FDR         |
|-----------|-------------|-------------|--------------|-------------|-------------|
| RBP2      | 2.037824387 | 0.139397015 | -3.869758154 | 4.08E-36    | 1.18E-34    |
| CETP      | 2.257560383 | 5.432347509 | 1.266811196  | 2.15E-18    | 7.06E-18    |
| C8G       | 0.339359283 | 1.155214376 | 1.767275217  | 3.66E-09    | 6.69E-09    |
| APOD      | 10.8744237  | 3.910502721 | -1.475512954 | 8.00E-23    | 3.64E-22    |
| ORM2      | 0.076579212 | 2.804391432 | 5.194591116  | 7.94E-13    | 1.82E-12    |
| ORM1      | 0.132598528 | 3.962466698 | 4.90126214   | 0.000614203 | 0.000800583 |
| PRTN3     | 0.040807546 | 0.25283187  | 2.631270478  | 1.24E-10    | 2.47E-10    |
| PML       | 4.127491986 | 9.57467159  | 1.21395759   | 3.33E-36    | 9.89E-35    |
| AEN       | 2.457039503 | 6.439466189 | 1.390020046  | 2.01E-36    | 6.48E-35    |
| CYBB      | 5.948485569 | 21.40530795 | 1.847374268  | 1.71E-20    | 6.53E-20    |
| ISG20     | 0.41655104  | 2.125562903 | 2.351279771  | 2.86E-36    | 8.70E-35    |
| TLR3      | 5.539796903 | 16.01348697 | 1.531382501  | 3.44E-24    | 1.74E-23    |
| IDO1      | 1.222919186 | 12.36748266 | 3.338150901  | 2.43E-36    | 7.58E-35    |
| GDF15     | 79.55718229 | 34.44815336 | -1.207565533 | 1.94E-16    | 5.58E-16    |
| CCL20     | 3.115283676 | 17.81231427 | 2.515439526  | 1.17E-18    | 3.89E-18    |
| IRF1      | 5.463305597 | 12.01400087 | 1.136870644  | 3.27E-20    | 1.22E-19    |
| IL15      | 0.639172143 | 1.312437882 | 1.037972703  | 4.94E-23    | 2.29E-22    |
| APOBEC3F  | 1.222887569 | 2.648046756 | 1.114636825  | 3.68E-30    | 3.36E-29    |
| RARRES3   | 34.38991556 | 80.1438001  | 1.220605345  | 1.57E-15    | 4.26E-15    |
| CHIT1     | 0.077507872 | 2.431162175 | 4.971159477  | 1.23E-21    | 5.10E-21    |
| CD40      | 6.298331111 | 22.51214435 | 1.837661976  | 6.24E-36    | 1.74E-34    |
| TLR7      | 0.653760812 | 2.853060323 | 2.125675444  | 1.31E-24    | 6.92E-24    |
| VEGFA     | 10.79031619 | 125.7155178 | 3.542353694  | 2.71E-37    | 1.23E-35    |
| ISG15     | 13.7994606  | 40.46061088 | 1.551906227  | 8.66E-26    | 5.06E-25    |
| TNFAIP3   | 6.156998153 | 15.3819319  | 1.320937669  | 3.51E-25    | 1.94E-24    |
| TFR2      | 0.048947392 | 0.754157325 | 3.945561616  | 5.32E-29    | 4.22E-28    |
| LYZ       | 20.62648308 | 114.1078376 | 2.467828128  | 1.72E-24    | 8.96E-24    |
| CCL5      | 5.452020633 | 51.86301717 | 3.249843211  | 5.05E-35    | 1.11E-33    |
| KLKB1     | 0.646815801 | 1.766200451 | 1.449222259  | 3.31E-08    | 5.70E-08    |
| TLR8      | 0.398471467 | 1.794289803 | 2.170864597  | 2.55E-23    | 1.21E-22    |
| GNLY      | 0.490162003 | 4.338098701 | 3.145732321  | 4.28E-37    | 1.79E-35    |
| APOM      | 38.40334376 | 16.86765048 | -1.186972899 | 0.00079868  | 0.001033839 |
| BST2      | 54.71206903 | 134.9449007 | 1.302439442  | 7.78E-23    | 3.54E-22    |
| BPHL      | 10.42599381 | 3.653792286 | -1.512718382 | 1.49E-21    | 6.15E-21    |
| PDGFRA    | 7.540041465 | 1.449602308 | -2.3789153   | 9.55E-32    | 1.08E-30    |
| GNAI1     | 23.59326063 | 10.08993414 | -1.225458057 | 1.09E-25    | 6.33E-25    |
| WNT5A     | 2.707965281 | 1.072318992 | -1.336475101 | 4.91E-13    | 1.14E-12    |
| NOS2      | 0.59413861  | 1.204800056 | 1.019922293  | 0.002423956 | 0.003028364 |
| MSR1      | 1.976159253 | 8.485425345 | 2.102287765  | 9.49E-28    | 6.54E-27    |
| DLL4      | 3.828581707 | 20.8556227  | 2.445554437  | 7.87E-32    | 9.04E-31    |
| SLC11A1   | 0.304216049 | 1.604221745 | 2.398705405  | 1.83E-33    | 2.83E-32    |
| TMEM173   | 9.211673472 | 19.02865531 | 1.046638437  | 6.75E-23    | 3.09E-22    |
| DES       | 21.21334589 | 7.238267128 | -1.551255933 | 2.96E-11    | 6.13E-11    |
| TNFRSF10B | 7.282567361 | 20.89170975 | 1.520411519  | 2.66E-37    | 1.22E-35    |
| CCL4      | 1.353069597 | 8.732162588 | 2.690102944  | 1.84E-32    | 2.39E-31    |
| APOBEC3H  | 0.215014276 | 1.599652516 | 2.895254191  | 3.68E-36    | 1.08E-34    |

Table S2. The immune-related DEGs were screened out in TCGA

| ID       | conMean     | treatMean   | logFC        | pValue      | FDR         |
|----------|-------------|-------------|--------------|-------------|-------------|
| TMPRSS6  | 0.069317915 | 0.295344512 | 2.091098637  | 5.06E-13    | 1.17E-12    |
| SPINK5   | 0.21438913  | 0.944449288 | 2.139241573  | 1.19E-07    | 1.97E-07    |
| MARCO    | 0.513380503 | 2.577398728 | 2.327815329  | 7.27E-11    | 1.47E-10    |
| TNFSF11  | 0.055632971 | 0.250587558 | 2.171302735  | 5.90E-05    | 8.23E-05    |
| KNG1     | 288.1662501 | 2.998896111 | -6.586326023 | 1.30E-41    | 4.16E-39    |
| KLRK1    | 0.029883865 | 0.326691405 | 3.450489826  | 7.38E-29    | 5.76E-28    |
| CLDN4    | 49.91557688 | 21.58078602 | -1.209742688 | 1.08E-13    | 2.61E-13    |
| CCL28    | 2.527795814 | 7.263620979 | 1.522808991  | 1.43E-15    | 3.90E-15    |
| IRF7     | 3.246384853 | 10.86632612 | 1.742958307  | 1.53E-29    | 1.29E-28    |
| LTB4R    | 0.519578019 | 3.04305765  | 2.550109361  | 4.49E-38    | 2.70E-36    |
| APOBEC3A | 0.196572769 | 0.449295121 | 1.192599918  | 1.89E-12    | 4.21E-12    |
| IL7R     | 2.286850316 | 5.217229036 | 1.189921831  | 6.31E-14    | 1.54E-13    |
| IFNAR2   | 2.667835708 | 5.754906838 | 1.109122749  | 2.94E-29    | 2.40E-28    |
| SYTL1    | 0.372823383 | 1.091240262 | 1.549404527  | 6.52E-11    | 1.32E-10    |
| APOBEC3C | 5.735219014 | 24.61184262 | 2.101432187  | 5.44E-32    | 6.44E-31    |
| PTGS2    | 5.727144401 | 2.5058454   | -1.19251857  | 2.04E-14    | 5.15E-14    |
| CD40LG   | 0.375650774 | 1.065211627 | 1.503676102  | 2.32E-18    | 7.59E-18    |
| CD14     | 18.80520831 | 62.83544718 | 1.740446365  | 1.94E-27    | 1.31E-26    |
| MASP1    | 0.967176061 | 4.030233341 | 2.059012928  | 4.09E-19    | 1.41E-18    |
| PROC     | 5.261353549 | 1.422607443 | -1.886896381 | 2.92E-21    | 1.18E-20    |
| HRG      | 10.93005619 | 2.354339139 | -2.21490676  | 7.84E-42    | 2.83E-39    |
| NDRG1    | 92.62849931 | 239.8847846 | 1.372813608  | 1.15E-26    | 7.21E-26    |
| IRF9     | 0.563746139 | 1.906369183 | 1.757709983  | 2.67E-19    | 9.36E-19    |
| TRIM22   | 6.872980139 | 18.10588291 | 1.397450834  | 3.65E-27    | 2.39E-26    |
| HMOX1    | 24.87096883 | 128.4014111 | 2.368126444  | 1.97E-32    | 2.54E-31    |
| BACH2    | 0.484030686 | 0.230260188 | -1.071833522 | 2.02E-21    | 8.30E-21    |
| PIK3CG   | 0.760539903 | 1.849939691 | 1.282382391  | 1.84E-14    | 4.65E-14    |
| PDCD1    | 0.257014739 | 2.666049357 | 3.374780489  | 3.86E-26    | 2.32E-25    |
| ARG2     | 37.12929571 | 9.539183227 | -1.960620301 | 2.69E-27    | 1.79E-26    |
| AQP9     | 0.912599834 | 4.128871543 | 2.177693238  | 1.69E-16    | 4.89E-16    |
| FASLG    | 0.139840728 | 1.632608074 | 3.545321997  | 3.64E-35    | 8.23E-34    |
| BIRC5    | 0.401040877 | 2.170156096 | 2.435977619  | 9.38E-34    | 1.54E-32    |
| VIM      | 109.0103189 | 639.5199219 | 2.552524595  | 4.86E-37    | 2.00E-35    |
| VCAM1    | 29.0877245  | 103.6318576 | 1.832985227  | 8.23E-22    | 3.48E-21    |
| GFAP     | 0.145218033 | 0.371593389 | 1.355504216  | 0.035658299 | 0.040710534 |
| GBP2     | 6.270769403 | 24.73639289 | 1.979920766  | 9.52E-35    | 1.94E-33    |
| ALB      | 54.80645898 | 21.52170558 | -1.348553511 | 5.03E-16    | 1.41E-15    |
| OAS1     | 4.888371375 | 13.44938515 | 1.460114423  | 8.67E-30    | 7.50E-29    |
| AGER     | 0.735303564 | 3.212644635 | 2.127349524  | 5.81E-26    | 3.44E-25    |
| NOS1     | 1.580688498 | 0.08064948  | -4.292744047 | 1.54E-29    | 1.30E-28    |
| ACO1     | 25.11522347 | 12.09053945 | -1.054683497 | 1.86E-24    | 9.68E-24    |
| CCL18    | 0.240432572 | 12.12416365 | 5.656109063  | 1.08E-30    | 1.06E-29    |
| CCL22    | 0.319994012 | 0.673709132 | 1.074080948  | 5.63E-12    | 1.22E-11    |
| CCL4L2   | 1.021498395 | 6.129015295 | 2.584968368  | 9.51E-22    | 3.99E-21    |
| CCR7     | 0.523290493 | 1.614489439 | 1.625394051  | 1.00E-19    | 3.62E-19    |
| CCR8     | 0.036456592 | 0.258426905 | 2.825504683  | 3.29E-22    | 1.43E-21    |



Table S2. The immune-related DEGs were screened out in TCGA

| ID      | conMean     | treatMean   | logFC        | pValue      | FDR         |
|---------|-------------|-------------|--------------|-------------|-------------|
| CCL3    | 1.57382809  | 5.668468198 | 1.848680963  | 8.77E-18    | 2.75E-17    |
| CCL11   | 2.321754935 | 0.411467152 | -2.496366534 | 4.10E-28    | 2.95E-27    |
| CCR5    | 0.782307784 | 5.954670484 | 2.92821345   | 9.31E-32    | 1.06E-30    |
| CCL23   | 1.164984526 | 0.425394819 | -1.453436424 | 3.04E-14    | 7.58E-14    |
| CCL3L1  | 0.782775898 | 2.583180855 | 1.722477412  | 1.35E-10    | 2.68E-10    |
| CCR1    | 2.950080943 | 6.545957196 | 1.14984963   | 1.20E-11    | 2.55E-11    |
| XCL2    | 0.332617371 | 1.964680643 | 2.562359401  | 1.73E-27    | 1.17E-26    |
| CXCR4   | 13.70918847 | 94.82623863 | 2.790143139  | 4.33E-39    | 3.76E-37    |
| CXCR6   | 0.308036263 | 2.060846095 | 2.742064663  | 1.85E-31    | 2.01E-30    |
| CCR4    | 0.37777026  | 1.049633981 | 1.474305297  | 4.56E-13    | 1.06E-12    |
| FAM19A5 | 0.619465019 | 1.696229581 | 1.453236728  | 7.27E-11    | 1.47E-10    |
| CDH1    | 53.0348044  | 18.82839958 | -1.494029072 | 5.83E-31    | 5.89E-30    |
| IL10    | 0.200087059 | 0.50553959  | 1.337196218  | 3.56E-12    | 7.82E-12    |
| FGR     | 1.999401647 | 5.741111935 | 1.521761869  | 1.98E-28    | 1.47E-27    |
| MIF     | 23.23782518 | 51.43787337 | 1.146355944  | 1.44E-20    | 5.55E-20    |
| CRP     | 0.039230023 | 4.083626221 | 6.701748816  | 5.53E-10    | 1.06E-09    |
| PTGDR   | 0.125898207 | 0.600976753 | 2.255051445  | 7.67E-30    | 6.68E-29    |
| CD86    | 1.224751815 | 5.447647688 | 2.153143974  | 1.68E-30    | 1.60E-29    |
| HCK     | 2.050127786 | 8.59168049  | 2.067226506  | 3.51E-33    | 5.17E-32    |
| VDR     | 10.8537089  | 3.359952172 | -1.691675519 | 2.80E-23    | 1.32E-22    |
| RNASE2  | 0.376079281 | 2.019287882 | 2.424737872  | 1.50E-26    | 9.35E-26    |
| CD79A   | 1.308517064 | 4.445079049 | 1.764276337  | 1.02E-09    | 1.92E-09    |
| BTK     | 0.541992096 | 2.527741105 | 2.221504991  | 3.60E-33    | 5.30E-32    |
| BLNK    | 9.552324958 | 4.287332507 | -1.155771605 | 2.01E-29    | 1.67E-28    |
| VAV3    | 27.17348351 | 10.44541001 | -1.379330401 | 3.61E-35    | 8.17E-34    |
| VAV1    | 0.70746699  | 3.586581249 | 2.341874574  | 5.87E-34    | 1.01E-32    |
| RAC2    | 4.125681333 | 17.26656379 | 2.065276704  | 3.53E-29    | 2.86E-28    |
| NFATC2  | 1.54546936  | 3.506266326 | 1.181890531  | 8.23E-23    | 3.74E-22    |
| CARD11  | 0.949591299 | 4.033692469 | 2.086722476  | 6.80E-24    | 3.36E-23    |
| NFKBIE  | 6.618898931 | 15.23765777 | 1.202978012  | 2.66E-26    | 1.62E-25    |
| CD19    | 0.134982263 | 0.29865017  | 1.145686696  | 0.001834211 | 0.002312618 |
| CR2     | 2.50528243  | 0.183293138 | -3.77274857  | 1.14E-28    | 8.71E-28    |
| PIK3R5  | 0.361425004 | 2.584320304 | 2.838016668  | 1.00E-37    | 5.28E-36    |
| INPP5D  | 1.973086658 | 6.462947246 | 1.711737895  | 7.42E-34    | 1.25E-32    |
| CD22    | 0.342610763 | 0.811314312 | 1.243690464  | 2.79E-10    | 5.44E-10    |
| CD72    | 0.362359888 | 2.408438665 | 2.732603018  | 1.21E-36    | 4.31E-35    |
| LILRB3  | 0.191575925 | 1.056059909 | 2.462703506  | 3.19E-35    | 7.31E-34    |
| FCGR2B  | 0.396042087 | 1.586283661 | 2.001925122  | 8.50E-24    | 4.18E-23    |
| RASGRP3 | 2.125646417 | 4.549844282 | 1.097915533  | 1.03E-25    | 5.97E-25    |
| IGHA1   | 110.5818066 | 382.7663462 | 1.791349943  | 1.13E-08    | 2.00E-08    |
| IGHA2   | 13.1693102  | 57.92937063 | 2.137115211  | 1.60E-08    | 2.81E-08    |
| IGHD    | 3.47977236  | 7.861654315 | 1.175839998  | 0.001315795 | 0.001678622 |
| IGHE    | 0.09999659  | 0.353360308 | 1.821189196  | 0.002436529 | 0.003043702 |
| IGHG1   | 45.43358152 | 363.3513878 | 2.999534474  | 4.06E-07    | 6.52E-07    |
| IGHG2   | 53.540109   | 210.2353181 | 1.973313072  | 5.58E-06    | 8.34E-06    |
| IGHG3   | 12.89760276 | 121.8557209 | 3.239999137  | 6.32E-08    | 1.07E-07    |

Table S2. The immune-related DEGs were screened out in TCGA

| ID       | conMean     | treatMean   | logFC       | pValue      | FDR         |
|----------|-------------|-------------|-------------|-------------|-------------|
| IGHG4    | 25.72455506 | 57.58469046 | 1.162539182 | 0.001218361 | 0.001558182 |
| IGHJ2    | 0.929418008 | 5.149062181 | 2.469910189 | 0.000138464 | 0.000188725 |
| IGHJ3    | 1.827186476 | 10.7568777  | 2.557563597 | 1.56E-06    | 2.42E-06    |
| IGHM     | 27.09973814 | 110.5711665 | 2.028624408 | 2.61E-09    | 4.82E-09    |
| IGHV1-18 | 8.956996947 | 55.70513736 | 2.636723366 | 2.05E-06    | 3.15E-06    |
| IGHV1-2  | 11.49579373 | 26.4907642  | 1.204383382 | 0.000434522 | 0.000572394 |
| IGHV1-24 | 5.155594012 | 33.68942038 | 2.708085042 | 0.0007009   | 0.000910246 |
| IGHV1-3  | 0.223389594 | 1.822157704 | 3.028013936 | 1.16E-05    | 1.69E-05    |
| IGHV1-45 | 0.275815979 | 1.177627542 | 2.094105374 | 0.000269995 | 0.000360928 |
| IGHV1-46 | 2.743081623 | 15.71182552 | 2.517981356 | 3.83E-06    | 5.78E-06    |
| IGHV1-58 | 0.889514594 | 3.047616159 | 1.776591029 | 0.024968837 | 0.028874819 |
| IGHV1-69 | 1.61452826  | 9.229171318 | 2.515088421 | 7.28E-05    | 0.000101045 |
| IGHV2-26 | 1.17714612  | 7.622778442 | 2.69502353  | 7.49E-05    | 0.000103947 |
| IGHV2-5  | 1.626936919 | 3.448719093 | 1.083902308 | 0.00297793  | 0.003695355 |
| IGHV2-70 | 1.656294636 | 12.97103667 | 2.969262547 | 0.000891782 | 0.001150881 |
| IGHV3-11 | 5.841501167 | 21.9016924  | 1.906631285 | 7.33E-05    | 0.000101761 |
| IGHV3-15 | 8.033585604 | 37.07454247 | 2.206312939 | 2.80E-05    | 3.99E-05    |
| IGHV3-20 | 0.342937209 | 1.811452692 | 2.401130777 | 9.87E-06    | 1.45E-05    |
| IGHV3-21 | 4.432468157 | 31.22557114 | 2.816545788 | 2.22E-06    | 3.40E-06    |
| IGHV3-23 | 15.06798929 | 75.58112064 | 2.326538996 | 9.28E-06    | 1.37E-05    |
| IGHV3-30 | 6.065975761 | 54.654816   | 3.171536989 | 2.24E-07    | 3.65E-07    |
| IGHV3-33 | 4.261851907 | 20.08033199 | 2.236230754 | 5.44E-06    | 8.13E-06    |
| IGHV3-35 | 0.150863298 | 0.560083236 | 1.892399377 | 0.000404838 | 0.000534386 |
| IGHV3-38 | 0.087050101 | 0.509610854 | 2.54947813  | 3.37E-05    | 4.77E-05    |
| IGHV3-43 | 1.233913283 | 4.604851501 | 1.899913624 | 8.90E-05    | 0.000122652 |
| IGHV3-48 | 1.24586632  | 9.322350761 | 2.903544519 | 1.91E-06    | 2.94E-06    |
| IGHV3-49 | 3.019982567 | 17.28818116 | 2.517173969 | 6.01E-06    | 8.96E-06    |
| IGHV3-53 | 2.274194994 | 10.78057039 | 2.245005647 | 0.000946178 | 0.0012194   |
| IGHV3-64 | 0.367105422 | 2.127335659 | 2.534781359 | 8.66E-06    | 1.28E-05    |
| IGHV3-66 | 1.470538824 | 7.11600166  | 2.274721973 | 9.28E-05    | 0.000127874 |
| IGHV3-7  | 0.800938598 | 2.448886886 | 1.612362587 | 0.002168932 | 0.002718824 |
| IGHV3-72 | 1.79127637  | 5.567548948 | 1.636054394 | 0.00260664  | 0.003247927 |
| IGHV3-73 | 1.720516429 | 20.65981033 | 3.585913436 | 0.001871801 | 0.002357991 |
| IGHV4-28 | 0.940814095 | 5.01157033  | 2.41328115  | 0.000101513 | 0.000139507 |
| IGHV4-31 | 2.635738927 | 15.81837258 | 2.585321798 | 6.65E-05    | 9.25E-05    |
| IGHV4-34 | 4.934541898 | 27.00094745 | 2.452021969 | 9.99E-06    | 1.47E-05    |
| IGHV4-39 | 10.18009334 | 58.14495383 | 2.513903202 | 0.000176906 | 0.000239455 |
| IGHV4-4  | 0.596255098 | 2.784694064 | 2.223517237 | 0.000209519 | 0.000282045 |
| IGHV4-59 | 5.931061566 | 31.93591725 | 2.428817635 | 2.74E-05    | 3.91E-05    |
| IGHV4-61 | 0.880962227 | 3.013112678 | 1.774102557 | 0.001377879 | 0.001755214 |
| IGHV5-51 | 11.71673263 | 56.41247575 | 2.267443943 | 6.29E-05    | 8.77E-05    |
| IGHV6-1  | 0.342533854 | 2.469780651 | 2.850064429 | 3.39E-06    | 5.14E-06    |
| IGKC     | 69.86566755 | 432.7235856 | 2.630790172 | 4.55E-08    | 7.76E-08    |
| IGKJ5    | 0.511897653 | 4.008572135 | 2.96916114  | 1.19E-06    | 1.85E-06    |
| IGKV1-12 | 0.736419297 | 1.767910023 | 1.263445516 | 0.000522011 | 0.000684054 |
| IGKV1-16 | 3.66623047  | 19.33284086 | 2.398684264 | 4.61E-06    | 6.93E-06    |

Table S2. The immune-related DEGs were screened out in TCGA

| ID        | conMean     | treatMean   | logFC       | pValue      | FDR         |
|-----------|-------------|-------------|-------------|-------------|-------------|
| IGKV1-17  | 4.290085233 | 22.96411421 | 2.42030292  | 2.85E-05    | 4.06E-05    |
| IGKV1-27  | 3.305946873 | 12.32980267 | 1.899014265 | 8.85E-05    | 0.000122034 |
| IGKV1-33  | 0.068910751 | 0.536434485 | 2.960601003 | 0.00294533  | 0.003656002 |
| IGKV1-39  | 0.174729916 | 1.194486311 | 2.773191775 | 0.010642987 | 0.012665037 |
| IGKV1-5   | 22.94765016 | 75.37975577 | 1.715830692 | 0.00030553  | 0.000406846 |
| IGKV1-6   | 3.616319605 | 13.51034496 | 1.90147042  | 0.000454082 | 0.000597166 |
| IGKV1-8   | 0.532781266 | 2.333930189 | 2.131146148 | 5.49E-05    | 7.68E-05    |
| IGKV1-9   | 6.249610452 | 34.40638203 | 2.460838023 | 3.77E-05    | 5.33E-05    |
| IGKV1D-12 | 0.143719423 | 0.569367598 | 1.986105347 | 0.031252317 | 0.035821328 |
| IGKV1D-13 | 0.561049656 | 1.47929134  | 1.398705846 | 0.004004301 | 0.004920355 |
| IGKV1D-16 | 0.38308698  | 1.78084432  | 2.216817506 | 4.62E-05    | 6.50E-05    |
| IGKV1D-17 | 0.20194485  | 0.553245967 | 1.453959673 | 0.001886806 | 0.002375875 |
| IGKV1D-39 | 0.06654096  | 0.620356125 | 3.220782062 | 0.000371867 | 0.000492062 |
| IGKV1D-42 | 0.118195626 | 0.339532339 | 1.522372348 | 0.024474073 | 0.028328116 |
| IGKV1D-43 | 0.095152802 | 0.647564283 | 2.766705364 | 0.009653354 | 0.011530707 |
| IGKV1D-8  | 0.557545693 | 1.837839128 | 1.720848539 | 5.76E-06    | 8.60E-06    |
| IGKV2-24  | 2.562533482 | 15.65721317 | 2.61118469  | 5.47E-05    | 7.64E-05    |
| IGKV2-28  | 0.094094636 | 1.795693071 | 4.254284486 | 5.46E-05    | 7.63E-05    |
| IGKV2-30  | 0.783076669 | 1.979691728 | 1.338050325 | 0.000794108 | 0.001028116 |
| IGKV2D-24 | 0.15442559  | 0.568533003 | 1.88033226  | 0.000181221 | 0.000245071 |
| IGKV2D-29 | 1.152520884 | 6.769730069 | 2.554305417 | 6.51E-06    | 9.69E-06    |
| IGKV2D-30 | 0.068049783 | 0.267724693 | 1.976087753 | 0.008832521 | 0.010584014 |
| IGKV2D-40 | 0.591343743 | 2.611844381 | 2.143000037 | 0.009066488 | 0.010856163 |
| IGKV3-11  | 16.25485653 | 79.24572673 | 2.285462318 | 1.83E-06    | 2.82E-06    |
| IGKV3-15  | 5.805712656 | 39.27893908 | 2.758210888 | 1.23E-06    | 1.92E-06    |
| IGKV3-20  | 36.32660977 | 160.4613739 | 2.14312742  | 3.99E-05    | 5.62E-05    |
| IGKV3-7   | 0.517787288 | 1.660191768 | 1.680918443 | 2.58E-06    | 3.94E-06    |
| IGKV3D-11 | 0.44319516  | 1.917625878 | 2.113307251 | 7.49E-05    | 0.000103913 |
| IGKV3D-15 | 0.737091759 | 2.109140634 | 1.516739162 | 0.002103146 | 0.002639253 |
| IGKV3D-20 | 1.856870892 | 6.156037195 | 1.72912844  | 0.000420348 | 0.000554184 |
| IGKV4-1   | 22.3848872  | 97.57261536 | 2.123951251 | 4.39E-06    | 6.60E-06    |
| IGKV5-2   | 0.547297696 | 5.30014141  | 3.275633164 | 0.000453944 | 0.000597023 |
| IGKV6-21  | 1.03289805  | 3.527769219 | 1.772058322 | 9.15E-05    | 0.00012603  |
| IGKV6D-21 | 0.40939284  | 1.818111987 | 2.15088329  | 0.001771069 | 0.002235608 |
| IGLC2     | 44.5174044  | 228.6131896 | 2.360467257 | 4.17E-09    | 7.58E-09    |
| IGLC3     | 27.01878303 | 171.6655449 | 2.667565904 | 1.29E-08    | 2.28E-08    |
| IGLC6     | 0.119058536 | 0.601370793 | 2.336583745 | 3.22E-05    | 4.57E-05    |
| IGLC7     | 0.960335685 | 6.227441905 | 2.697028965 | 7.99E-06    | 1.18E-05    |
| IGLJ2     | 0.114384091 | 0.39731721  | 1.796404877 | 0.00885332  | 0.01060832  |
| IGLV1-36  | 1.152643858 | 4.21611198  | 1.870966366 | 0.000194511 | 0.000262442 |
| IGLV1-40  | 13.55344794 | 177.9843242 | 3.715018364 | 3.31E-07    | 5.35E-07    |
| IGLV1-44  | 11.27860858 | 48.7341877  | 2.111345102 | 2.07E-06    | 3.17E-06    |
| IGLV1-47  | 6.388097263 | 36.16840818 | 2.50127192  | 5.42E-07    | 8.63E-07    |
| IGLV1-50  | 0.15383399  | 0.667502541 | 2.117399024 | 0.000311541 | 0.000414641 |
| IGLV1-51  | 14.28230035 | 57.20029646 | 2.001794261 | 8.59E-08    | 1.44E-07    |
| IGLV10-54 | 1.894357916 | 7.256751497 | 1.93761493  | 9.55E-05    | 0.000131496 |

Table S2. The immune-related DEGs were screened out in TCGA

| ID       | conMean     | treatMean   | logFC        | pValue      | FDR         |
|----------|-------------|-------------|--------------|-------------|-------------|
| IGLV2-11 | 10.21579816 | 39.00749926 | 1.932949584  | 2.11E-06    | 3.24E-06    |
| IGLV2-14 | 23.7326758  | 98.57276775 | 2.054314365  | 4.44E-06    | 6.67E-06    |
| IGLV2-18 | 1.164087098 | 5.19661036  | 2.158371884  | 6.29E-05    | 8.76E-05    |
| IGLV2-23 | 14.18486224 | 75.80777859 | 2.417993751  | 1.19E-06    | 1.85E-06    |
| IGLV2-8  | 4.389469195 | 17.26615716 | 1.97582863   | 6.16E-07    | 9.79E-07    |
| IGLV3-1  | 10.99084213 | 38.42420146 | 1.805713347  | 5.28E-07    | 8.42E-07    |
| IGLV3-10 | 4.086395064 | 36.00517493 | 3.139303683  | 1.93E-05    | 2.78E-05    |
| IGLV3-12 | 0.107528232 | 0.512671375 | 2.253318853  | 3.58E-08    | 6.15E-08    |
| IGLV3-16 | 0.238380436 | 3.446111105 | 3.853631475  | 0.000351268 | 0.000465644 |
| IGLV3-19 | 14.18982428 | 123.4008551 | 3.120423763  | 7.61E-07    | 1.20E-06    |
| IGLV3-21 | 12.38973266 | 56.10132689 | 2.178889836  | 5.09E-06    | 7.63E-06    |
| IGLV3-25 | 10.55332712 | 46.96425583 | 2.153865244  | 2.14E-07    | 3.49E-07    |
| IGLV3-27 | 0.951204104 | 4.225916517 | 2.151437422  | 0.000463089 | 0.000608739 |
| IGLV3-9  | 1.652075363 | 8.349854986 | 2.337471642  | 2.18E-05    | 3.13E-05    |
| IGLV4-3  | 0.073914308 | 0.297659233 | 2.00973609   | 0.009128675 | 0.010927446 |
| IGLV4-60 | 0.986003858 | 7.428199202 | 2.913347308  | 0.000295687 | 0.000394199 |
| IGLV4-69 | 4.600324245 | 36.05767816 | 2.970499046  | 0.000373714 | 0.000494411 |
| IGLV5-37 | 0.266608137 | 0.842445289 | 1.659862183  | 0.004241025 | 0.00520223  |
| IGLV5-45 | 1.532065772 | 5.745637537 | 1.90698875   | 1.51E-05    | 2.20E-05    |
| IGLV5-48 | 0.112185317 | 0.493044874 | 2.13583509   | 0.004539569 | 0.005554868 |
| IGLV5-52 | 0.050711024 | 0.3164373   | 2.641548368  | 4.58E-09    | 8.30E-09    |
| IGLV6-57 | 4.468005686 | 20.71576499 | 2.21302617   | 2.28E-06    | 3.49E-06    |
| IGLV7-43 | 1.955734998 | 8.688353114 | 2.15137184   | 1.33E-05    | 1.94E-05    |
| IGLV7-46 | 2.072737913 | 30.89589622 | 3.897805611  | 1.36E-06    | 2.11E-06    |
| IGLV8-61 | 4.347945808 | 20.09799394 | 2.208645644  | 2.13E-05    | 3.06E-05    |
| IGLV9-49 | 0.825740822 | 24.64058859 | 4.899203879  | 1.07E-06    | 1.67E-06    |
| C3       | 22.99807194 | 235.7467393 | 3.357652995  | 2.34E-33    | 3.56E-32    |
| C5       | 1.98548505  | 0.974544859 | -1.026690998 | 2.91E-32    | 3.60E-31    |
| CKLF     | 2.729053529 | 5.792647343 | 1.085822144  | 2.45E-30    | 2.28E-29    |
| CX3CL1   | 20.38310458 | 41.15719871 | 1.013770984  | 3.02E-18    | 9.80E-18    |
| EDN1     | 9.967852014 | 34.23102498 | 1.779949937  | 4.86E-18    | 1.55E-17    |
| SEMA3A   | 0.189572838 | 0.41963461  | 1.146381405  | 0.002418253 | 0.003021606 |
| SEMA3B   | 11.76148754 | 4.609254218 | -1.351465292 | 1.93E-28    | 1.44E-27    |
| SEMA3F   | 11.20445658 | 24.62551571 | 1.136081258  | 6.10E-24    | 3.04E-23    |
| SEMA3G   | 18.17338861 | 6.023849073 | -1.593069921 | 5.15E-30    | 4.60E-29    |
| SEMA4A   | 9.113818778 | 3.051167014 | -1.578694532 | 9.06E-22    | 3.81E-21    |
| SEMA5B   | 2.082418883 | 27.6203172  | 3.729397684  | 2.77E-32    | 3.44E-31    |
| SEMA6A   | 2.831858922 | 10.95869285 | 1.952254424  | 2.56E-29    | 2.11E-28    |
| SEMA6B   | 2.768146275 | 8.425802233 | 1.605893874  | 1.53E-25    | 8.75E-25    |
| SEMA6D   | 9.514390299 | 1.26975477  | -2.905561315 | 1.35E-37    | 6.79E-36    |
| SLIT2    | 4.282229282 | 1.86475961  | -1.199372382 | 9.51E-14    | 2.30E-13    |
| TNC      | 32.0911616  | 15.00162227 | -1.09705749  | 7.32E-07    | 1.16E-06    |
| TYMP     | 4.304598149 | 33.13173079 | 2.944263104  | 4.69E-37    | 1.94E-35    |
| C5AR1    | 3.605503958 | 9.359148153 | 1.376176299  | 3.16E-23    | 1.49E-22    |
| CCRL2    | 0.87396559  | 2.426985188 | 1.47351692   | 3.50E-29    | 2.84E-28    |
| CX3CR1   | 2.027509138 | 6.70631854  | 1.725812594  | 1.66E-17    | 5.13E-17    |

Table S2. The immune-related DEGs were screened out in TCGA

| ID      | conMean     | treatMean   | logFC        | pValue      | FDR         |
|---------|-------------|-------------|--------------|-------------|-------------|
| CXCR3   | 0.371623525 | 3.382527768 | 3.18618804   | 3.52E-31    | 3.66E-30    |
| CYSLTR1 | 0.476301081 | 1.090941784 | 1.195628388  | 7.06E-18    | 2.23E-17    |
| EDNRA   | 3.748537333 | 8.923995553 | 1.251362024  | 4.11E-18    | 1.32E-17    |
| FPR1    | 1.842032599 | 5.525870812 | 1.584903241  | 4.13E-17    | 1.24E-16    |
| FPR2    | 0.163058047 | 0.412641538 | 1.339503416  | 1.95E-11    | 4.09E-11    |
| LTB4R2  | 0.168818613 | 0.802658086 | 2.249311586  | 9.46E-34    | 1.56E-32    |
| PLAUR   | 1.890214832 | 5.432327378 | 1.523020213  | 2.41E-21    | 9.86E-21    |
| PLXNA3  | 1.441355619 | 3.711254294 | 1.364480528  | 2.58E-29    | 2.12E-28    |
| PLXNA4  | 1.030777932 | 0.183567644 | -2.48934986  | 4.03E-33    | 5.89E-32    |
| PLXNB1  | 19.20313639 | 7.242743757 | -1.406733721 | 5.13E-36    | 1.46E-34    |
| PLXNB3  | 0.12341833  | 0.500386446 | 2.019486028  | 8.29E-15    | 2.14E-14    |
| PLXNC1  | 1.1945283   | 3.515213769 | 1.557171392  | 2.64E-23    | 1.25E-22    |
| PLXND1  | 9.233672639 | 28.41906014 | 1.621882353  | 6.88E-31    | 6.89E-30    |
| PTAFR   | 1.975882161 | 5.364454696 | 1.440934618  | 2.14E-19    | 7.57E-19    |
| XCR1    | 0.212447169 | 0.545847427 | 1.361393634  | 1.55E-09    | 2.90E-09    |
| ADM     | 12.07183515 | 80.42273438 | 2.735958378  | 4.95E-37    | 2.02E-35    |
| AGT     | 23.32483383 | 50.60252513 | 1.117342576  | 9.34E-09    | 1.66E-08    |
| AMH     | 0.060116315 | 0.39390047  | 2.712002652  | 5.55E-17    | 1.65E-16    |
| ANGPTL7 | 0.444157062 | 0.212461096 | -1.063871234 | 2.38E-13    | 5.63E-13    |
| APLN    | 6.064477011 | 33.99312623 | 2.486787907  | 5.53E-33    | 7.87E-32    |
| BDNF    | 0.143576146 | 0.633485553 | 2.141495643  | 5.45E-13    | 1.26E-12    |
| BMP1    | 2.151834175 | 7.837272629 | 1.864784779  | 2.28E-33    | 3.48E-32    |
| BMP5    | 0.843819914 | 0.349110677 | -1.273250655 | 9.95E-07    | 1.56E-06    |
| BMP6    | 14.4672776  | 3.283360442 | -2.139548426 | 2.46E-19    | 8.63E-19    |
| BMP7    | 3.334839914 | 0.378357432 | -3.139795818 | 1.94E-37    | 9.23E-36    |
| BMP8A   | 0.213770845 | 0.581148867 | 1.442842664  | 3.12E-15    | 8.30E-15    |
| BMP8B   | 0.629849776 | 1.481873568 | 1.234342682  | 3.49E-09    | 6.39E-09    |
| BTC     | 4.092454764 | 1.157579386 | -1.821855334 | 2.26E-36    | 7.14E-35    |
| CALCA   | 8.634989161 | 1.194736171 | -2.853502298 | 2.69E-38    | 1.76E-36    |
| CAT     | 123.5289486 | 51.07843203 | -1.274063028 | 2.08E-33    | 3.19E-32    |
| CD70    | 1.815810682 | 36.13037075 | 4.31452636   | 9.13E-36    | 2.45E-34    |
| CHGB    | 7.505851206 | 0.56755816  | -3.725175547 | 2.27E-39    | 2.34E-37    |
| CMTM2   | 0.161999704 | 0.368444491 | 1.185456106  | 1.31E-11    | 2.77E-11    |
| CMTM3   | 5.356410861 | 15.09815297 | 1.495033537  | 1.47E-29    | 1.24E-28    |
| CMTM4   | 27.75082024 | 7.570558575 | -1.874058759 | 2.03E-37    | 9.54E-36    |
| CSF1    | 7.164363264 | 14.4531964  | 1.012478193  | 4.67E-22    | 2.01E-21    |
| CTF1    | 7.684911203 | 3.378299894 | -1.185731187 | 1.26E-26    | 7.89E-26    |
| CTGF    | 190.8310664 | 83.9272039  | -1.185085632 | 1.30E-19    | 4.66E-19    |
| EBI3    | 0.982246128 | 4.88358894  | 2.31378529   | 1.62E-33    | 2.53E-32    |
| EGF     | 74.50253505 | 1.589919098 | -5.550264254 | 3.88E-38    | 2.40E-36    |
| EPO     | 0.962355036 | 8.855615117 | 3.201951379  | 9.26E-09    | 1.65E-08    |
| ESM1    | 8.264372046 | 103.5572073 | 3.647378951  | 2.79E-37    | 1.26E-35    |
| FAM3B   | 6.902502356 | 0.430629103 | -4.002601748 | 2.02E-40    | 3.58E-38    |
| FGF1    | 26.41248142 | 1.479408148 | -4.158127816 | 3.23E-31    | 3.40E-30    |
| FGF14   | 0.145720211 | 0.318787333 | 1.12939332   | 0.031064472 | 0.035611968 |
| FGF7    | 1.747524878 | 0.800011909 | -1.127219613 | 6.85E-17    | 2.03E-16    |

Table S2. The immune-related DEGs were screened out in TCGA

| ID        | conMean     | treatMean   | logFC        | pValue      | FDR         |
|-----------|-------------|-------------|--------------|-------------|-------------|
| FGF9      | 9.149162983 | 1.075261352 | -3.088952401 | 1.56E-36    | 5.28E-35    |
| GDF3      | 2.173530581 | 0.470366337 | -2.208183676 | 1.58E-06    | 2.44E-06    |
| GDF6      | 0.37890828  | 4.544392649 | 3.584166923  | 2.78E-29    | 2.27E-28    |
| GDF7      | 2.248676313 | 0.819640679 | -1.456012514 | 1.48E-32    | 1.95E-31    |
| GMFG      | 6.790638792 | 24.41895476 | 1.846382248  | 2.94E-35    | 6.83E-34    |
| GNRH1     | 0.178043116 | 1.28296754  | 2.849186111  | 1.65E-31    | 1.80E-30    |
| GREM1     | 2.026311349 | 0.361915718 | -2.485130195 | 7.46E-07    | 1.18E-06    |
| IL11      | 1.442833319 | 0.134805611 | -3.419952193 | 6.57E-30    | 5.79E-29    |
| IL16      | 0.589597089 | 2.210966514 | 1.906875869  | 8.63E-32    | 9.84E-31    |
| IL24      | 0.398831635 | 0.874172873 | 1.132138761  | 6.65E-19    | 2.26E-18    |
| IL32      | 21.53573967 | 83.82719765 | 1.960685526  | 2.32E-28    | 1.71E-27    |
| IL34      | 1.862572189 | 4.495850981 | 1.271297875  | 9.75E-13    | 2.22E-12    |
| IL7       | 0.703906974 | 1.626606139 | 1.20840828   | 1.69E-24    | 8.84E-24    |
| INHBB     | 1.785995579 | 25.1763071  | 3.817266267  | 5.40E-38    | 3.17E-36    |
| INHBE     | 0.114432542 | 1.186352414 | 3.373963352  | 7.23E-18    | 2.29E-17    |
| INSL3     | 0.166406688 | 0.447177734 | 1.426134936  | 5.98E-11    | 1.21E-10    |
| JAG2      | 2.464757322 | 7.855815598 | 1.672315458  | 2.89E-27    | 1.92E-26    |
| KITLG     | 21.52851915 | 6.954415999 | -1.630247813 | 3.34E-31    | 3.50E-30    |
| KL        | 53.4211564  | 18.70037734 | -1.514343825 | 3.60E-18    | 1.16E-17    |
| LTB       | 3.023133071 | 6.293113535 | 1.057729487  | 3.69E-08    | 6.34E-08    |
| MDK       | 7.52182584  | 24.04585735 | 1.676633558  | 3.42E-08    | 5.88E-08    |
| MSTN      | 0.111334463 | 0.308371399 | 1.469768729  | 5.41E-09    | 9.78E-09    |
| NGF       | 1.724507074 | 7.614480068 | 2.142561483  | 7.05E-25    | 3.80E-24    |
| NMB       | 4.496406361 | 26.26324022 | 2.54620059   | 1.59E-31    | 1.74E-30    |
| NRG3      | 0.320035543 | 1.272436077 | 1.99128914   | 1.12E-29    | 9.65E-29    |
| NTS       | 1.858870504 | 0.837367851 | -1.150492836 | 0.00104296  | 0.001339768 |
| OGN       | 3.634924457 | 1.646940747 | -1.142136731 | 6.32E-16    | 1.76E-15    |
| OSM       | 0.525026197 | 1.919826635 | 1.870514724  | 9.11E-15    | 2.35E-14    |
| PDGFD     | 6.480145444 | 24.03746681 | 1.891186766  | 1.07E-23    | 5.23E-23    |
| PDGFRL    | 0.789984438 | 1.8177989   | 1.202296467  | 0.001513956 | 0.001922964 |
| PGF       | 1.895384371 | 29.09362359 | 3.940140642  | 1.71E-35    | 4.23E-34    |
| PMCH      | 0.011450176 | 0.323610897 | 4.820818461  | 5.80E-27    | 3.73E-26    |
| PTHLH     | 0.312913128 | 14.43224251 | 5.527389487  | 6.30E-36    | 1.75E-34    |
| REG1A     | 5.419557857 | 37.31737496 | 2.783600443  | 2.82E-10    | 5.51E-10    |
| RETN      | 0.080380331 | 0.512194119 | 2.671776271  | 1.36E-19    | 4.88E-19    |
| SCG2      | 0.206756901 | 3.342029928 | 4.014717263  | 1.19E-27    | 8.15E-27    |
| SCGB3A1   | 0.2821962   | 0.891585871 | 1.659675191  | 2.78E-13    | 6.54E-13    |
| STC2      | 1.485266486 | 23.58730573 | 3.989216928  | 4.29E-38    | 2.62E-36    |
| TAC1      | 0.879882936 | 0.111907125 | -2.975009697 | 7.19E-33    | 9.97E-32    |
| TDGF1     | 4.941875346 | 0.500182846 | -3.304531135 | 2.11E-36    | 6.72E-35    |
| TGFA      | 10.33891817 | 32.95195043 | 1.672278627  | 4.01E-25    | 2.21E-24    |
| TNFRSF11B | 30.39567186 | 13.77588677 | -1.141720719 | 4.21E-21    | 1.69E-20    |
| TNFSF13B  | 1.005474456 | 5.701772058 | 2.503533935  | 1.57E-31    | 1.71E-30    |
| TNFSF14   | 0.114871977 | 1.55979764  | 3.763260072  | 4.76E-34    | 8.30E-33    |
| TNFSF15   | 1.742586521 | 0.749936981 | -1.216389015 | 2.42E-24    | 1.25E-23    |
| TNFSF8    | 0.475100429 | 1.746131819 | 1.877858061  | 1.89E-25    | 1.07E-24    |

Table S2. The immune-related DEGs were screened out in TCGA

| ID      | conMean     | treatMean   | logFC        | pValue      | FDR         |
|---------|-------------|-------------|--------------|-------------|-------------|
| TNFSF9  | 0.555273832 | 6.020362831 | 3.438579124  | 6.92E-34    | 1.17E-32    |
| UCN     | 0.219488887 | 1.32043169  | 2.588789867  | 5.39E-33    | 7.70E-32    |
| VEGFC   | 3.189453496 | 6.994936381 | 1.133001693  | 1.55E-17    | 4.81E-17    |
| VIP     | 0.100782698 | 0.450943659 | 2.161699212  | 9.95E-14    | 2.40E-13    |
| ADRB1   | 0.785908845 | 0.294305843 | -1.417045805 | 6.18E-34    | 1.06E-32    |
| ANGPTL1 | 7.418793986 | 1.196912248 | -2.631867294 | 3.95E-36    | 1.15E-34    |
| ANGPTL2 | 9.848470819 | 25.9743834  | 1.399117863  | 6.80E-18    | 2.15E-17    |
| ANGPTL3 | 11.02284145 | 3.314820816 | -1.733493375 | 2.96E-23    | 1.40E-22    |
| ANGPTL4 | 11.07169999 | 340.8253171 | 4.944083844  | 1.58E-36    | 5.32E-35    |
| APLNR   | 7.656364378 | 20.39366017 | 1.413389331  | 1.84E-12    | 4.12E-12    |
| AVPR1B  | 0.132594746 | 1.831644103 | 3.788043694  | 3.26E-26    | 1.98E-25    |
| AVPR2   | 7.926016222 | 0.725834401 | -3.44888358  | 5.62E-39    | 4.66E-37    |
| BMPR1B  | 6.925853413 | 1.525887457 | -2.182343294 | 1.89E-36    | 6.15E-35    |
| C3AR1   | 3.346978871 | 12.57674676 | 1.909827438  | 5.02E-28    | 3.58E-27    |
| CALCRL  | 10.04338083 | 20.5130162  | 1.030294643  | 7.70E-12    | 1.66E-11    |
| CNTFR   | 1.18102445  | 0.46929796  | -1.331462739 | 1.14E-20    | 4.43E-20    |
| CRHR2   | 0.096275014 | 0.259108678 | 1.428323996  | 1.15E-07    | 1.91E-07    |
| CSF1R   | 7.452381472 | 23.2148752  | 1.639276095  | 1.55E-24    | 8.13E-24    |
| CSF2RA  | 0.940421503 | 3.654180793 | 1.958168582  | 1.91E-30    | 1.81E-29    |
| CSF2RB  | 1.354506286 | 3.549222509 | 1.389735934  | 3.25E-23    | 1.53E-22    |
| CSF3R   | 0.361273153 | 2.497306914 | 2.789211182  | 4.99E-36    | 1.42E-34    |
| EGFR    | 10.23830246 | 28.39874681 | 1.471850735  | 8.44E-24    | 4.15E-23    |
| ESRRB   | 12.01685323 | 0.186421239 | -6.010349107 | 3.15E-41    | 9.02E-39    |
| ESRRG   | 9.957923889 | 1.152864747 | -3.110621721 | 5.61E-41    | 1.41E-38    |
| FGFR2   | 11.88838857 | 4.92208734  | -1.272211013 | 9.34E-28    | 6.45E-27    |
| FLT1    | 11.79856785 | 45.57086422 | 1.94949998   | 7.10E-25    | 3.83E-24    |
| FLT4    | 4.349304556 | 9.914092772 | 1.188696023  | 3.22E-16    | 9.14E-16    |
| GCGR    | 5.430422043 | 0.7829299   | -2.79410928  | 2.20E-36    | 6.96E-35    |
| IFNGR2  | 18.42842153 | 39.67874578 | 1.10643392   | 8.05E-35    | 1.67E-33    |
| IL10RA  | 1.7733518   | 8.547340509 | 2.268996829  | 1.42E-31    | 1.56E-30    |
| IL10RB  | 9.550411444 | 19.31456255 | 1.01605421   | 2.80E-34    | 5.10E-33    |
| IL12RB1 | 0.281273986 | 1.74229676  | 2.63094234   | 1.39E-36    | 4.81E-35    |
| IL12RB2 | 0.18194062  | 1.165041818 | 2.678842156  | 0.004842922 | 0.005916572 |
| IL13RA2 | 2.898230885 | 1.347450712 | -1.104940028 | 2.07E-08    | 3.61E-08    |
| IL15RA  | 2.055387417 | 5.678963155 | 1.466217201  | 4.48E-30    | 4.03E-29    |
| IL17RE  | 2.600160454 | 0.951753036 | -1.449941482 | 3.77E-29    | 3.04E-28    |
| IL18R1  | 1.058179985 | 2.621489478 | 1.308801721  | 1.73E-20    | 6.62E-20    |
| IL18RAP | 0.202747075 | 0.690481198 | 1.767921031  | 3.10E-24    | 1.58E-23    |
| IL1RAP  | 0.788852025 | 1.612824186 | 1.031762573  | 1.46E-15    | 3.99E-15    |
| IL1RL1  | 8.227516492 | 2.075214184 | -1.987196768 | 1.62E-22    | 7.19E-22    |
| IL20RB  | 0.672176993 | 10.24814299 | 3.930377536  | 6.27E-37    | 2.47E-35    |
| IL21R   | 0.180143879 | 1.136034379 | 2.656784954  | 2.61E-32    | 3.28E-31    |
| IL22RA1 | 0.865452788 | 2.586410077 | 1.579424009  | 1.95E-15    | 5.26E-15    |
| IL2RA   | 0.334480075 | 1.620337851 | 2.276302479  | 9.76E-19    | 3.28E-18    |
| IL2RB   | 0.763775293 | 6.259662302 | 3.034864672  | 4.52E-37    | 1.88E-35    |
| IL2RG   | 3.815911381 | 13.90997645 | 1.866020405  | 2.53E-23    | 1.20E-22    |

Table S2. The immune-related DEGs were screened out in TCGA

| ID        | conMean     | treatMean   | logFC        | pValue   | FDR      |
|-----------|-------------|-------------|--------------|----------|----------|
| IL3RA     | 4.988365139 | 13.59181659 | 1.446099313  | 3.31E-28 | 2.40E-27 |
| IL4R      | 4.881285833 | 13.64068417 | 1.482582868  | 6.75E-35 | 1.44E-33 |
| INSR      | 15.25112535 | 38.0406436  | 1.318625955  | 2.49E-25 | 1.39E-24 |
| KDR       | 18.6239401  | 43.08507936 | 1.210030018  | 1.98E-12 | 4.42E-12 |
| LGR6      | 0.632048805 | 0.210063396 | -1.589211175 | 7.28E-19 | 2.47E-18 |
| MC1R      | 0.264908213 | 0.799431296 | 1.59348148   | 5.41E-20 | 1.99E-19 |
| MCHR1     | 0.087334375 | 4.565749915 | 5.708158423  | 1.85E-25 | 1.05E-24 |
| MET       | 20.76852771 | 46.29848048 | 1.156565898  | 1.96E-24 | 1.02E-23 |
| NGFR      | 2.313789089 | 8.467775684 | 1.871725689  | 9.76E-19 | 3.28E-18 |
| NR0B2     | 12.87589489 | 1.486644849 | -3.114540763 | 9.70E-38 | 5.16E-36 |
| NR1H3     | 4.204288542 | 8.723172943 | 1.052991307  | 5.41E-30 | 4.81E-29 |
| NR1I3     | 1.192470162 | 0.217708335 | -2.453484618 | 2.63E-32 | 3.30E-31 |
| NR2E1     | 0.035360978 | 0.719879866 | 4.347526103  | 1.26E-05 | 1.83E-05 |
| NR3C2     | 11.14803619 | 2.762160559 | -2.012920503 | 1.39E-37 | 6.95E-36 |
| NR4A2     | 12.34924099 | 5.541268422 | -1.156134215 | 3.53E-08 | 6.07E-08 |
| NR4A3     | 7.697664926 | 3.264947522 | -1.23736107  | 7.83E-09 | 1.40E-08 |
| NR5A2     | 0.501486453 | 1.219608861 | 1.282135903  | 8.90E-20 | 3.23E-19 |
| NRP1      | 19.33172615 | 41.3433067  | 1.096683319  | 1.34E-21 | 5.57E-21 |
| NRP2      | 1.891662182 | 6.209033214 | 1.714714178  | 5.06E-28 | 3.60E-27 |
| OGFR      | 6.041739389 | 12.50979341 | 1.050022105  | 1.29E-33 | 2.06E-32 |
| OPRL1     | 0.421510908 | 0.844054275 | 1.001765804  | 5.25E-19 | 1.80E-18 |
| OSMR      | 9.402279542 | 26.62434045 | 1.501663308  | 1.12E-25 | 6.47E-25 |
| PPARA     | 8.637702278 | 4.296827626 | -1.007375689 | 5.64E-25 | 3.07E-24 |
| PRLR      | 5.089004043 | 1.480109057 | -1.781679857 | 5.65E-17 | 1.68E-16 |
| PTGER1    | 9.081212405 | 0.265394724 | -5.096673324 | 9.60E-41 | 2.16E-38 |
| PTGER3    | 36.22309219 | 8.233594074 | -2.137315479 | 1.06E-33 | 1.73E-32 |
| PTGFR     | 2.835108582 | 0.926759906 | -1.613136453 | 6.90E-30 | 6.08E-29 |
| PTH1R     | 73.50216802 | 8.079874382 | -3.185382036 | 3.31E-25 | 1.83E-24 |
| RARA      | 7.262338653 | 15.19483995 | 1.065075367  | 8.71E-27 | 5.52E-26 |
| SCTR      | 4.773160885 | 1.749431184 | -1.448059049 | 4.01E-14 | 9.93E-14 |
| SDC3      | 8.28777425  | 17.34777311 | 1.065693868  | 1.44E-23 | 6.97E-23 |
| SORT1     | 37.95197806 | 13.23821091 | -1.51946692  | 9.04E-39 | 6.89E-37 |
| SSTR5     | 1.622891918 | 0.109789717 | -3.88575208  | 4.63E-32 | 5.53E-31 |
| TACR1     | 0.832519025 | 0.314857087 | -1.402786099 | 2.86E-23 | 1.35E-22 |
| TEK       | 22.50718069 | 8.632241494 | -1.382578221 | 3.85E-32 | 4.66E-31 |
| TGFBR3    | 15.92464507 | 5.356685893 | -1.571848612 | 1.99E-34 | 3.77E-33 |
| THRB      | 6.16222875  | 1.629610372 | -1.91892517  | 6.43E-38 | 3.64E-36 |
| TNFRSF13C | 0.141724726 | 0.325606696 | 1.200038895  | 2.02E-08 | 3.52E-08 |
| TNFRSF14  | 5.158948625 | 23.1763763  | 2.167506029  | 1.00E-38 | 7.50E-37 |
| TNFRSF17  | 0.223611994 | 0.678031667 | 1.600355082  | 1.98E-07 | 3.24E-07 |
| TNFRSF18  | 0.155185162 | 1.163310576 | 2.906173788  | 2.65E-32 | 3.32E-31 |
| TNFRSF1B  | 8.299252042 | 22.28444455 | 1.424983775  | 6.71E-29 | 5.27E-28 |
| TNFRSF25  | 0.642991257 | 2.448286157 | 1.928901165  | 1.19E-19 | 4.27E-19 |
| TNFRSF4   | 0.570296188 | 5.561031829 | 3.285569301  | 6.99E-38 | 3.89E-36 |
| TNFRSF9   | 0.093367998 | 1.623367798 | 4.119917946  | 6.71E-31 | 6.72E-30 |
| TSHR      | 0.046037775 | 0.251863624 | 2.451752769  | 2.01E-23 | 9.66E-23 |



Table S2. The immune-related DEGs were screened out in TCGA

| ID      | conMean     | treatMean   | logFC        | pValue   | FDR      |
|---------|-------------|-------------|--------------|----------|----------|
| TUBB3   | 0.089289797 | 0.249026016 | 1.47972923   | 8.29E-09 | 1.48E-08 |
| ITGAL   | 1.221017113 | 7.198869878 | 2.559687022  | 1.35E-33 | 2.13E-32 |
| ITGB2   | 4.560106314 | 24.18347272 | 2.406882064  | 3.25E-34 | 5.87E-33 |
| TYROBP  | 15.28945163 | 96.42195363 | 2.656824997  | 1.62E-36 | 5.42E-35 |
| LCK     | 2.048330546 | 4.955535296 | 1.274592359  | 8.55E-16 | 2.36E-15 |
| FCGR3A  | 5.324274978 | 54.78629213 | 3.363157979  | 1.15E-37 | 5.91E-36 |
| FCGR3B  | 0.343330288 | 0.977381146 | 1.509324139  | 5.29E-07 | 8.44E-07 |
| NCR1    | 0.050670735 | 0.327064827 | 2.690351947  | 8.14E-32 | 9.33E-31 |
| NCR3    | 0.203123655 | 0.730691176 | 1.846903528  | 4.46E-26 | 2.67E-25 |
| CD247   | 0.498860564 | 3.068987214 | 2.621054103  | 1.52E-34 | 2.95E-33 |
| ZAP70   | 0.24077723  | 1.853038361 | 2.944121876  | 4.11E-34 | 7.30E-33 |
| LCP2    | 1.60631535  | 7.624742511 | 2.246933469  | 1.79E-36 | 5.86E-35 |
| LAT     | 0.025849011 | 0.275403271 | 3.413364728  | 3.03E-29 | 2.48E-28 |
| SH3BP2  | 4.034804486 | 13.43978336 | 1.735939211  | 1.37E-34 | 2.68E-33 |
| SHC2    | 2.000505413 | 4.997053687 | 1.320713186  | 1.94E-17 | 5.96E-17 |
| SHC3    | 0.59571092  | 0.209852883 | -1.505234119 | 1.71E-25 | 9.76E-25 |
| SHC1    | 17.57345944 | 37.06370639 | 1.076608936  | 1.14E-31 | 1.27E-30 |
| HCST    | 2.506624654 | 9.894549697 | 1.98088807   | 1.59E-27 | 1.08E-26 |
| CD48    | 1.921758003 | 7.55138923  | 1.974315405  | 5.84E-27 | 3.75E-26 |
| CD244   | 0.212198227 | 1.08118021  | 2.3491225    | 1.61E-32 | 2.11E-31 |
| PRKCA   | 8.382534028 | 3.659701811 | -1.19566033  | 9.88E-32 | 1.11E-30 |
| SH2D1B  | 0.235735878 | 0.56113457  | 1.251175452  | 1.94E-17 | 5.96E-17 |
| SH2D1A  | 0.376502135 | 2.149816285 | 2.513483427  | 9.19E-27 | 5.82E-26 |
| FAS     | 4.339167014 | 10.13104214 | 1.223292565  | 1.32E-26 | 8.24E-26 |
| GZMB    | 0.760945961 | 4.539312802 | 2.576607999  | 3.66E-32 | 4.45E-31 |
| PRF1    | 1.677410115 | 10.782119   | 2.684333371  | 6.58E-35 | 1.40E-33 |
| BID     | 2.75022775  | 5.892018811 | 1.099210941  | 1.10E-35 | 2.85E-34 |
| CD3D    | 1.618134958 | 12.11799203 | 2.904746818  | 4.82E-30 | 4.33E-29 |
| CD3E    | 1.760655164 | 11.22003117 | 2.671892403  | 8.19E-29 | 6.36E-28 |
| CD3G    | 0.354834962 | 2.149054049 | 2.598481698  | 6.83E-28 | 4.79E-27 |
| PTPRC   | 2.958021914 | 10.97800215 | 1.891910882  | 1.70E-24 | 8.89E-24 |
| ITK     | 0.260597012 | 1.165764617 | 2.161384071  | 3.29E-26 | 1.99E-25 |
| GRAP2   | 0.204742758 | 0.68192207  | 1.735794455  | 3.09E-25 | 1.72E-24 |
| CD28    | 0.401188881 | 1.092552612 | 1.445349226  | 1.22E-16 | 3.56E-16 |
| ICOS    | 0.068278474 | 0.728396481 | 3.415221227  | 1.60E-31 | 1.75E-30 |
| MAP3K14 | 2.977203307 | 7.857882948 | 1.400182934  | 1.32E-26 | 8.24E-26 |
| CTLA4   | 0.114287353 | 0.907691279 | 2.98953593   | 1.86E-27 | 1.25E-26 |
| CBLC    | 4.100831594 | 0.988518325 | -2.052576883 | 3.19E-34 | 5.78E-33 |
| PDK1    | 1.321960119 | 5.058250405 | 1.935959804  | 7.51E-35 | 1.57E-33 |
| PRKCC   | 8.453836333 | 2.651547517 | -1.67277158  | 4.39E-26 | 2.63E-25 |
| TRAC    | 4.743952097 | 20.71046861 | 2.12619885   | 4.54E-23 | 2.11E-22 |
| TRAJ1   | 0.021891544 | 0.437100626 | 4.319519799  | 9.74E-13 | 2.22E-12 |
| TRAJ3   | 0.056552988 | 0.553283985 | 3.290345022  | 2.17E-09 | 4.02E-09 |
| TRAJ18  | 0.023256135 | 0.364358804 | 3.96967661   | 1.30E-11 | 2.76E-11 |
| TRAJ35  | 0.43073961  | 0.187077841 | -1.203177312 | 1.11E-06 | 1.73E-06 |
| TRAV1-1 | 0.037999211 | 0.228868729 | 2.590478984  | 7.94E-14 | 1.93E-13 |

Table S2. The immune-related DEGs were screened out in TCGA

| ID        | conMean     | treatMean   | logFC        | pValue   | FDR      |
|-----------|-------------|-------------|--------------|----------|----------|
| TRAV1-2   | 0.166123721 | 0.76676314  | 2.206522893  | 1.26E-16 | 3.68E-16 |
| TRAV2     | 0.119579648 | 0.705460227 | 2.56059288   | 1.16E-19 | 4.18E-19 |
| TRAV3     | 0.116137831 | 0.748555373 | 2.688271044  | 5.58E-19 | 1.91E-18 |
| TRAV4     | 0.155301446 | 1.013204457 | 2.705782163  | 1.48E-21 | 6.13E-21 |
| TRAV5     | 0.092755032 | 0.600441044 | 2.694525143  | 1.14E-18 | 3.82E-18 |
| TRAV8-1   | 0.078945269 | 0.38536212  | 2.287290054  | 1.50E-13 | 3.58E-13 |
| TRAV8-2   | 1.889770391 | 0.677133581 | -1.480698583 | 2.97E-06 | 4.52E-06 |
| TRAV8-3   | 0.223816011 | 0.979909809 | 2.130335726  | 1.91E-16 | 5.49E-16 |
| TRAV8-4   | 0.152096451 | 0.656695569 | 2.110238227  | 1.80E-16 | 5.20E-16 |
| TRAV8-6   | 0.15330211  | 0.827524867 | 2.43242511   | 1.64E-19 | 5.83E-19 |
| TRAV9-2   | 0.147797347 | 0.720451599 | 2.285281142  | 4.12E-18 | 1.33E-17 |
| TRAV10    | 0.048122876 | 0.335127569 | 2.799915593  | 8.40E-15 | 2.17E-14 |
| TRAV12-1  | 0.194002807 | 1.310076449 | 2.755501573  | 7.45E-20 | 2.72E-19 |
| TRAV12-2  | 0.218301273 | 1.35452236  | 2.633391757  | 5.45E-19 | 1.86E-18 |
| TRAV12-3  | 0.169048066 | 1.006449563 | 2.573769456  | 3.13E-19 | 1.09E-18 |
| TRAV13-1  | 0.276330233 | 1.49609232  | 2.436733886  | 3.73E-19 | 1.29E-18 |
| TRAV13-2  | 0.121282795 | 0.650105494 | 2.422298941  | 4.92E-19 | 1.69E-18 |
| TRAV14DV4 | 0.124019138 | 0.70335574  | 2.503691783  | 4.07E-19 | 1.41E-18 |
| TRAV16    | 0.12231083  | 0.661238388 | 2.43461833   | 4.26E-19 | 1.47E-18 |
| TRAV17    | 0.140349866 | 0.945829806 | 2.752552917  | 6.60E-21 | 2.60E-20 |
| TRAV19    | 0.158428723 | 1.430488225 | 3.174601803  | 4.24E-25 | 2.33E-24 |
| TRAV20    | 0.092756593 | 0.475867866 | 2.359039294  | 9.24E-14 | 2.24E-13 |
| TRAV21    | 0.168999613 | 1.258429278 | 2.896532294  | 1.19E-21 | 4.95E-21 |
| TRAV22    | 0.118260256 | 0.360959194 | 1.60987044   | 1.05E-07 | 1.74E-07 |
| TRAV23DV6 | 0.112269687 | 0.428993963 | 1.933988895  | 3.94E-15 | 1.04E-14 |
| TRAV24    | 0.068604758 | 0.681325397 | 3.311963443  | 3.45E-16 | 9.77E-16 |
| TRAV25    | 0.071733493 | 0.478806804 | 2.738724876  | 1.34E-16 | 3.89E-16 |
| TRAV26-1  | 0.078861069 | 0.468924188 | 2.571969524  | 7.88E-21 | 3.08E-20 |
| TRAV26-2  | 0.057277341 | 0.388472446 | 2.761775838  | 3.69E-15 | 9.78E-15 |
| TRAV27    | 0.080017135 | 0.826501118 | 3.368635894  | 1.54E-17 | 4.78E-17 |
| TRAV29DV5 | 0.162362257 | 1.008920985 | 2.635524988  | 2.90E-19 | 1.01E-18 |
| TRAV35    | 0.067022355 | 0.318884614 | 2.250320207  | 3.01E-15 | 8.03E-15 |
| TRAV36DV7 | 0.061838876 | 0.289964705 | 2.22929131   | 2.69E-16 | 7.67E-16 |
| TRAV38-1  | 0.050240006 | 0.288100635 | 2.5196643    | 1.08E-12 | 2.44E-12 |
| TRAV41    | 0.09234061  | 0.563372793 | 2.609052729  | 2.93E-21 | 1.19E-20 |
| TRBC1     | 0.107523008 | 0.793897945 | 2.884308154  | 5.32E-31 | 5.40E-30 |
| TRBC2     | 2.576459104 | 18.20364254 | 2.820765564  | 5.03E-29 | 4.00E-28 |
| TRBJ2-1   | 0.223418438 | 1.614231899 | 2.853027696  | 6.50E-22 | 2.77E-21 |
| TRBJ2-2   | 0.152181082 | 0.851993732 | 2.485053793  | 2.71E-14 | 6.78E-14 |
| TRBJ2-3   | 0.189229992 | 1.843410977 | 3.284165078  | 8.53E-25 | 4.57E-24 |
| TRBJ2-4   | 0.030405794 | 0.38169232  | 3.649991968  | 8.92E-13 | 2.03E-12 |
| TRBJ2-7   | 0.354102063 | 2.373454182 | 2.744751048  | 1.10E-19 | 3.97E-19 |
| TRBV2     | 0.182627847 | 1.268133092 | 2.7957275    | 8.58E-22 | 3.62E-21 |
| TRBV3-1   | 0.200870173 | 1.049109697 | 2.384830274  | 2.68E-19 | 9.37E-19 |
| TRBV4-1   | 0.123017573 | 1.354294019 | 3.460604661  | 1.01E-21 | 4.23E-21 |
| TRBV4-2   | 0.117070998 | 1.417207799 | 3.59759569   | 1.48E-21 | 6.13E-21 |

Table S2. The immune-related DEGs were screened out in TCGA

| ID       | conMean     | treatMean   | logFC       | pValue   | FDR         |
|----------|-------------|-------------|-------------|----------|-------------|
| TRBV5-1  | 0.240400225 | 1.300121923 | 2.43513677  | 2.86E-21 | 1.16E-20    |
| TRBV5-4  | 0.135794445 | 0.662669958 | 2.286866049 | 6.29E-18 | 2.00E-17    |
| TRBV5-5  | 0.044206428 | 0.312789636 | 2.822864647 | 8.54E-16 | 2.36E-15    |
| TRBV5-6  | 0.114617708 | 0.736621355 | 2.684093268 | 1.11E-19 | 4.00E-19    |
| TRBV6-1  | 0.15718123  | 0.85341478  | 2.440818147 | 6.70E-20 | 2.46E-19    |
| TRBV6-5  | 0.180384492 | 1.651042643 | 3.194230164 | 1.19E-23 | 5.80E-23    |
| TRBV6-6  | 0.108635302 | 0.675095226 | 2.635598024 | 3.66E-19 | 1.27E-18    |
| TRBV7-3  | 0.406110911 | 0.945351092 | 1.218976441 | 7.44E-05 | 0.000103171 |
| TRBV7-4  | 0.033955945 | 0.282215242 | 3.055059823 | 8.58E-14 | 2.08E-13    |
| TRBV7-6  | 0.097191294 | 0.779281389 | 3.003245367 | 4.79E-17 | 1.44E-16    |
| TRBV7-9  | 0.379669498 | 2.827487652 | 2.896704718 | 1.59E-23 | 7.65E-23    |
| TRBV9    | 0.190927867 | 1.639053492 | 3.10176335  | 5.33E-23 | 2.46E-22    |
| TRBV10-2 | 0.041812886 | 0.420734824 | 3.330891707 | 1.44E-14 | 3.66E-14    |
| TRBV10-3 | 0.188714398 | 0.79042779  | 2.066429173 | 1.05E-15 | 2.90E-15    |
| TRBV11-2 | 0.139708356 | 0.863098204 | 2.627106406 | 5.48E-19 | 1.88E-18    |
| TRBV12-3 | 0.085789612 | 0.472627531 | 2.461828806 | 6.04E-17 | 1.79E-16    |
| TRBV12-4 | 0.138878832 | 0.845183387 | 2.60543769  | 1.30E-18 | 4.34E-18    |
| TRBV13   | 0.06753949  | 0.642841843 | 3.250660639 | 6.13E-15 | 1.60E-14    |
| TRBV14   | 0.083606474 | 0.464931186 | 2.475330631 | 8.50E-17 | 2.50E-16    |
| TRBV15   | 0.047038241 | 0.521969299 | 3.472058939 | 3.47E-18 | 1.12E-17    |
| TRBV18   | 0.158751505 | 0.818320916 | 2.365896461 | 1.42E-18 | 4.73E-18    |
| TRBV19   | 0.319424665 | 2.130600632 | 2.73771257  | 1.23E-22 | 5.51E-22    |
| TRBV20-1 | 1.141252884 | 3.140158488 | 1.46021887  | 4.18E-22 | 1.80E-21    |
| TRBV24-1 | 0.099810743 | 0.523539388 | 2.391031074 | 6.28E-19 | 2.14E-18    |
| TRBV27   | 0.081946518 | 0.658507945 | 3.006446299 | 6.31E-17 | 1.87E-16    |
| TRBV28   | 1.116786232 | 8.664480758 | 2.955760234 | 2.11E-30 | 1.98E-29    |
| TRBV29-1 | 0.375992816 | 2.167340172 | 2.527148604 | 5.79E-21 | 2.29E-20    |
| TRBV30   | 0.110564428 | 0.62400682  | 2.496674495 | 9.14E-16 | 2.52E-15    |
| TRDC     | 0.536539903 | 2.540657403 | 2.243444473 | 1.04E-31 | 1.17E-30    |
| TRDV1    | 0.137387798 | 0.746249974 | 2.441405095 | 6.49E-20 | 2.38E-19    |
| TRGV5    | 0.128248552 | 0.435064862 | 1.762287971 | 4.56E-15 | 1.20E-14    |
| TRGV4    | 0.064596539 | 0.307302827 | 2.25013227  | 1.03E-20 | 3.98E-20    |
| TRGV3    | 0.136668263 | 0.466451619 | 1.771049186 | 5.45E-18 | 1.74E-17    |
| TRGV2    | 0.052945686 | 0.356171188 | 2.749985772 | 4.09E-25 | 2.25E-24    |
| TRGJP2   | 0.115550072 | 0.363523907 | 1.653532084 | 4.30E-06 | 6.47E-06    |
| TRGC2    | 0.210222527 | 1.067557081 | 2.34432403  | 1.49E-25 | 8.51E-25    |
| TRAV6    | 0.068594009 | 0.376544184 | 2.456664669 | 9.46E-16 | 2.61E-15    |

Table S3. Gene ontology analysis of prognostic-associated immune genes.

| ONTOLOGY | ID         | Description                                                   | GeneRatio | BgRatio   | pvalue   | p.adjust    | qvalue   | geneID                                                 | Count |
|----------|------------|---------------------------------------------------------------|-----------|-----------|----------|-------------|----------|--------------------------------------------------------|-------|
| BP       | GO:0043410 | positive regulation of MAPK cascade                           | 11/35     | 499/17913 | 1.60E-09 | 1.82E-06    | 1.06E-06 | AGER/CX3CL1/IL11/KL/TGFA/FLT1/INSR/KDR/NRP1/TEK/SHC1   | 11    |
| BP       | GO:0045785 | positive regulation of cell adhesion                          | 10/35     | 388/17913 | 2.29E-09 | 1.82E-06    | 1.06E-06 | XCL1/AGER/VAV3/CX3CL1/EBI3/MDK/KDR/NRP1/TEK/TNFRSF13C  | 10    |
| BP       | GO:0050900 | leukocyte migration                                           | 10/35     | 467/17913 | 1.35E-08 | 5.23E-06    | 3.05E-06 | XCL1/AGER/VAV3/IGKV1-12/CX3CL1/MDK/PDGFD/FLT1/TEK/SHC1 | 10    |
| BP       | GO:0018108 | peptidyl-tyrosine phosphorylation                             | 9/35      | 346/17913 | 1.53E-08 | 5.23E-06    | 3.05E-06 | IL11/PDGFD/TGFA/FLT1/INSR/KDR/NRP1/TEK/SHC1            | 9     |
| BP       | GO:0018212 | peptidyl-tyrosine modification                                | 9/35      | 349/17913 | 1.65E-08 | 5.23E-06    | 3.05E-06 | IL11/PDGFD/TGFA/FLT1/INSR/KDR/NRP1/TEK/SHC1            | 9     |
| BP       | GO:0060326 | cell chemotaxis                                               | 8/35      | 253/17913 | 2.40E-08 | 6.34E-06    | 3.70E-06 | XCL1/VAV3/CX3CL1/MDK/PDGFD/FLT1/KDR/NRP1               | 8     |
| BP       | GO:0097529 | myeloid leukocyte migration                                   | 7/35      | 170/17913 | 3.29E-08 | 7.46E-06    | 4.35E-06 | XCL1/AGER/VAV3/CX3CL1/MDK/PDGFD/FLT1                   | 7     |
| BP       | GO:0070661 | leukocyte proliferation                                       | 8/35      | 270/17913 | 3.97E-08 | 7.88E-06    | 4.59E-06 | XCL1/AGER/VAV3/CD19/CX3CL1/EBI3/IL34/TNFRSF13C         | 8     |
| BP       | GO:0050921 | positive regulation of chemotaxis                             | 6/35      | 130/17913 | 1.78E-07 | 3.13E-05    | 1.82E-05 | XCL1/AGER/MDK/PDGFD/KDR/NRP1                           | 6     |
| BP       | GO:1904018 | positive regulation of vasculature development                | 7/35      | 232/17913 | 2.76E-07 | 4.37E-05    | 2.55E-05 | CX3CL1/MDK/PDGFD/FLT1/KDR/NRP1/TEK                     | 7     |
| BP       | GO:0043552 | positive regulation of phosphatidylinositol 3-kinase activity | 4/35      | 32/17913  | 4.22E-07 | 6.09E-05    | 3.55E-05 | VAV3/CD19/FLT1/TEK                                     | 4     |
| BP       | GO:0090218 | positive regulation of lipid kinase activity                  | 4/35      | 36/17913  | 6.88E-07 | 8.90E-05    | 5.18E-05 | VAV3/CD19/FLT1/TEK                                     | 4     |
| BP       | GO:0043491 | protein kinase B signaling                                    | 7/35      | 268/17913 | 7.29E-07 | 8.90E-05    | 5.18E-05 | CD19/CX3CL1/KL/TGFA/INSR/KDR/TEK                       | 7     |
| BP       | GO:0051897 | positive regulation of protein kinase B signaling             | 6/35      | 173/17913 | 9.57E-07 | 0.000108442 | 6.32E-05 | CD19/CX3CL1/KL/TGFA/INSR/TEK                           | 6     |
| BP       | GO:0050920 | regulation of chemotaxis                                      | 6/35      | 186/17913 | 1.46E-06 | 0.000144819 | 8.44E-05 | XCL1/AGER/MDK/PDGFD/KDR/NRP1                           | 6     |

Table S3. Gene ontology analysis of prognostic-associated immune genes.

| ONTOLOGY | ID         | Description                                           | GeneRatio | BgRatio   | pvalue   | p.adjust    | qvalue      | geneID                                         | Count |
|----------|------------|-------------------------------------------------------|-----------|-----------|----------|-------------|-------------|------------------------------------------------|-------|
| BP       | GO:0070374 | positive regulation of ERK1 and ERK2 cascade          | 6/35      | 186/17913 | 1.46E-06 | 0.000144819 | 8.44E-05    | AGER/CX3CL1/KDR/NRP1/TEK/SHC1                  | 6     |
| BP       | GO:0032103 | positive regulation of response to external stimulus  | 7/35      | 315/17913 | 2.14E-06 | 0.000186577 | 0.000108724 | XCL1/AGER/CX3CL1/MDK/PDGFD/KDR/NRP1            | 7     |
| BP       | GO:0010811 | positive regulation of cell-substrate adhesion        | 5/35      | 110/17913 | 2.23E-06 | 0.000186577 | 0.000108724 | CX3CL1/MDK/KDR/NRP1/TEK                        | 5     |
| BP       | GO:1903727 | positive regulation of phospholipid metabolic process | 4/35      | 48/17913  | 2.24E-06 | 0.000186577 | 0.000108724 | VAV3/CD19/FLT1/TEK                             | 4     |
| BP       | GO:0045766 | positive regulation of angiogenesis                   | 6/35      | 203/17913 | 2.43E-06 | 0.000192536 | 0.000112196 | CX3CL1/MDK/FLT1/KDR/NRP1/TEK                   | 6     |
| BP       | GO:0001954 | positive regulation of cell-matrix adhesion           | 4/35      | 51/17913  | 2.86E-06 | 0.000215901 | 0.000125812 | CX3CL1/KDR/NRP1/TEK                            | 4     |
| BP       | GO:0002693 | positive regulation of cellular extravasation         | 3/35      | 15/17913  | 3.06E-06 | 0.000220564 | 0.000128529 | AGER/MDK/PDGFD                                 | 3     |
| BP       | GO:0043551 | regulation of phosphatidylinositol 3-kinase activity  | 4/35      | 53/17913  | 3.34E-06 | 0.000230349 | 0.000134231 | VAV3/CD19/FLT1/TEK                             | 4     |
| BP       | GO:0002694 | regulation of leukocyte activation                    | 8/35      | 492/17913 | 3.75E-06 | 0.000247656 | 0.000144316 | XCL1/AGER/VAV3/CD19/CX3CL1/EBI3/MDK/TNF/RSF13C | 8     |
| BP       | GO:0050671 | positive regulation of lymphocyte proliferation       | 5/35      | 125/17913 | 4.19E-06 | 0.000265855 | 0.000154922 | XCL1/AGER/VAV3/EBI3/TNFRSF13C                  | 5     |
| BP       | GO:0032946 | positive regulation of mononuclear cell proliferation | 5/35      | 126/17913 | 4.36E-06 | 0.000265855 | 0.000154922 | XCL1/AGER/VAV3/EBI3/TNFRSF13C                  | 5     |
| BP       | GO:0045123 | cellular extravasation                                | 4/35      | 59/17913  | 5.15E-06 | 0.000302458 | 0.000176251 | AGER/CX3CL1/MDK/PDGFD                          | 4     |
| BP       | GO:0070665 | positive regulation of leukocyte proliferation        | 5/35      | 134/17913 | 5.89E-06 | 0.000332265 | 0.000193621 | XCL1/AGER/VAV3/EBI3/TNFRSF13C                  | 5     |
| BP       | GO:0050678 | regulation of epithelial cell proliferation           | 7/35      | 369/17913 | 6.08E-06 | 0.000332265 | 0.000193621 | MDK/TGFA/FLT1/KDR/NRP1/TEK/TGFBR3              | 7     |
| BP       | GO:0043550 | regulation of lipid kinase activity                   | 4/35      | 62/17913  | 6.28E-06 | 0.000332265 | 0.000193621 | VAV3/CD19/FLT1/TEK                             | 4     |
| BP       | GO:0051896 | regulation of protein kinase B signaling              | 6/35      | 241/17913 | 6.52E-06 | 0.00033376  | 0.000194492 | CD19/CX3CL1/KL/TGFA/INSR/TEK                   | 6     |
| BP       | GO:0046651 | lymphocyte proliferation                              | 6/35      | 244/17913 | 7.00E-06 | 0.000347058 | 0.000202241 | XCL1/AGER/VAV3/CD19/EBI3/TNFRSF13C             | 6     |
| BP       | GO:0032943 | mononuclear cell proliferation                        | 6/35      | 246/17913 | 7.34E-06 | 0.000352629 | 0.000205488 | XCL1/AGER/VAV3/CD19/EBI3/TNFRSF13C             | 6     |
| BP       | GO:0022409 | positive regulation of cell-cell adhesion             | 6/35      | 251/17913 | 8.23E-06 | 0.000383964 | 0.000223748 | XCL1/AGER/CX3CL1/EBI3/MDK/TNFRSF13C            | 6     |

Table S3. Gene ontology analysis of prognostic-associated immune genes.

| ONTOLOGY | ID         | Description                                                                                                               | GeneRatio | BgRatio   | pvalue   | p.adjust    | qvalue      | geneID                                 | Count |
|----------|------------|---------------------------------------------------------------------------------------------------------------------------|-----------|-----------|----------|-------------|-------------|----------------------------------------|-------|
| BP       | GO:0050918 | positive chemotaxis                                                                                                       | 4/35      | 67/17913  | 8.58E-06 | 0.000388614 | 0.000226457 | AGER/CX3CL1/KDR/NRP1                   | 4     |
| BP       | GO:0071674 | mononuclear cell migration                                                                                                | 4/35      | 68/17913  | 9.10E-06 | 0.000400877 | 0.000233603 | AGER/MDK/PDGFD/FLT1                    | 4     |
| BP       | GO:0051251 | positive regulation of lymphocyte activation                                                                              | 6/35      | 258/17913 | 9.63E-06 | 0.000412777 | 0.000240538 | XCL1/AGER/VAV3/EBI3/MDK/TNFRSF13C      | 6     |
| BP       | GO:0051249 | regulation of lymphocyte activation                                                                                       | 7/35      | 401/17913 | 1.05E-05 | 0.00043664  | 0.000254443 | XCL1/AGER/VAV3/CD19/EBI3/MDK/TNFRSF13C | 7     |
| BP       | GO:0070372 | regulation of ERK1 and ERK2 cascade                                                                                       | 6/35      | 271/17913 | 1.27E-05 | 0.000517963 | 0.000301833 | AGER/CX3CL1/KDR/NRP1/TEK/SHC1          | 6     |
| BP       | GO:0050673 | epithelial cell proliferation                                                                                             | 7/35      | 425/17913 | 1.52E-05 | 0.000576242 | 0.000335793 | MDK/TGFA/FLT1/KDR/NRP1/TEK/TGFBR3      | 7     |
| BP       | GO:1901342 | regulation of vasculature development                                                                                     | 7/35      | 425/17913 | 1.52E-05 | 0.000576242 | 0.000335793 | CX3CL1/MDK/PDGFD/FLT1/KDR/NRP1/TEK     | 7     |
| BP       | GO:0051894 | positive regulation of focal adhesion assembly                                                                            | 3/35      | 25/17913  | 1.53E-05 | 0.000576242 | 0.000335793 | KDR/NRP1/TEK                           | 3     |
| BP       | GO:0002691 | regulation of cellular extravasation                                                                                      | 3/35      | 26/17913  | 1.72E-05 | 0.000607163 | 0.000353812 | AGER/MDK/PDGFD                         | 3     |
| BP       | GO:0061437 | renal system vasculature development                                                                                      | 3/35      | 26/17913  | 1.72E-05 | 0.000607163 | 0.000353812 | PDGFD/NRP1/TEK                         | 3     |
| BP       | GO:0061440 | kidney vasculature development                                                                                            | 3/35      | 26/17913  | 1.72E-05 | 0.000607163 | 0.000353812 | PDGFD/NRP1/TEK                         | 3     |
| BP       | GO:0070371 | ERK1 and ERK2 cascade                                                                                                     | 6/35      | 289/17913 | 1.83E-05 | 0.000631397 | 0.000367934 | AGER/CX3CL1/KDR/NRP1/TEK/SHC1          | 6     |
| BP       | GO:0001936 | regulation of endothelial cell proliferation                                                                              | 5/35      | 170/17913 | 1.87E-05 | 0.000631397 | 0.000367934 | MDK/FLT1/KDR/NRP1/TEK                  | 5     |
| BP       | GO:0002460 | adaptive immune response based on somatic recombination of immune receptors built from immunoglobulin superfamily domains | 6/35      | 295/17913 | 2.06E-05 | 0.000680248 | 0.000396401 | XCL1/AGER/CD19/IGKV1-12/EBI3/TNFRSF13C | 6     |
| BP       | GO:0031532 | actin cytoskeleton reorganization                                                                                         | 4/35      | 85/17913  | 2.21E-05 | 0.000715229 | 0.000416786 | MDK/NRP1/TEK/SHC1                      | 4     |
| BP       | GO:1903725 | regulation of phospholipid metabolic process                                                                              | 4/35      | 86/17913  | 2.31E-05 | 0.000734099 | 0.000427782 | VAV3/CD19/FLT1/TEK                     | 4     |
| BP       | GO:0002696 | positive regulation of leukocyte activation                                                                               | 6/35      | 305/17913 | 2.48E-05 | 0.000772455 | 0.000450133 | XCL1/AGER/VAV3/EBI3/MDK/TNFRSF13C      | 6     |
| BP       | GO:0042102 | positive regulation of T cell proliferation                                                                               | 4/35      | 90/17913  | 2.77E-05 | 0.000840882 | 0.000490007 | XCL1/AGER/EBI3/TNFRSF13C               | 4     |
| BP       | GO:0001935 | endothelial cell proliferation                                                                                            | 5/35      | 185/17913 | 2.81E-05 | 0.000840882 | 0.000490007 | MDK/FLT1/KDR/NRP1/TEK                  | 5     |
| BP       | GO:1903393 | positive regulation of adherens junction organization                                                                     | 3/35      | 31/17913  | 2.96E-05 | 0.000868904 | 0.000506337 | KDR/NRP1/TEK                           | 3     |
| BP       | GO:0030595 | leukocyte chemotaxis                                                                                                      | 5/35      | 188/17913 | 3.04E-05 | 0.00087526  | 0.000510041 | XCL1/VAV3/CX3CL1/MDK/FLT1              | 5     |

Table S3. Gene ontology analysis of prognostic-associated immune genes.

| ONTOLOGY | ID         | Description                                                            | GeneRatio | BgRatio   | pvalue   | p.adjust    | qvalue      | geneID                                 | Count |
|----------|------------|------------------------------------------------------------------------|-----------|-----------|----------|-------------|-------------|----------------------------------------|-------|
| BP       | GO:0048010 | vascular endothelial growth factor receptor signaling pathway          | 4/35      | 93/17913  | 3.15E-05 | 0.000889138 | 0.000518128 | VAV3/FLT1/KDR/NRP1                     | 4     |
| BP       | GO:0050867 | positive regulation of cell activation                                 | 6/35      | 319/17913 | 3.20E-05 | 0.000889138 | 0.000518128 | XCL1/AGER/VAV3/EBI3/MDK/TNFRSF13C      | 6     |
| BP       | GO:0050727 | regulation of inflammatory response                                    | 7/35      | 479/17913 | 3.29E-05 | 0.000898763 | 0.000523737 | XCL1/AGER/CD19/IGKV1-12/CX3CL1/MDK/TEK | 7     |
| BP       | GO:1901890 | positive regulation of cell junction assembly                          | 3/35      | 33/17913  | 3.58E-05 | 0.000962709 | 0.000561    | KDR/NRP1/TEK                           | 3     |
| BP       | GO:0050870 | positive regulation of T cell activation                               | 5/35      | 198/17913 | 3.89E-05 | 0.001002884 | 0.000584411 | XCL1/AGER/EBI3/MDK/TNFRSF13C           | 5     |
| BP       | GO:2000249 | regulation of actin cytoskeleton reorganization                        | 3/35      | 34/17913  | 3.92E-05 | 0.001002884 | 0.000584411 | MDK/NRP1/TEK                           | 3     |
| BP       | GO:0050670 | regulation of lymphocyte proliferation                                 | 5/35      | 199/17913 | 3.98E-05 | 0.001002884 | 0.000584411 | XCL1/AGER/VAV3/EBI3/TNFRSF13C          | 5     |
| BP       | GO:0050679 | positive regulation of epithelial cell proliferation                   | 5/35      | 199/17913 | 3.98E-05 | 0.001002884 | 0.000584411 | MDK/TGFA/KDR/NRP1/TEK                  | 5     |
| BP       | GO:0032944 | regulation of mononuclear cell proliferation                           | 5/35      | 200/17913 | 4.08E-05 | 0.001011112 | 0.000589206 | XCL1/AGER/VAV3/EBI3/TNFRSF13C          | 5     |
| BP       | GO:0010810 | regulation of cell-substrate adhesion                                  | 5/35      | 201/17913 | 4.18E-05 | 0.001019526 | 0.000594109 | CX3CL1/MDK/KDR/NRP1/TEK                | 5     |
| BP       | GO:0001938 | positive regulation of endothelial cell proliferation                  | 4/35      | 107/17913 | 5.46E-05 | 0.001312788 | 0.000765001 | MDK/KDR/NRP1/TEK                       | 4     |
| BP       | GO:0070663 | regulation of leukocyte proliferation                                  | 5/35      | 214/17913 | 5.63E-05 | 0.001313186 | 0.000765234 | XCL1/AGER/VAV3/EBI3/TNFRSF13C          | 5     |
| BP       | GO:1903039 | positive regulation of leukocyte cell-cell adhesion                    | 5/35      | 214/17913 | 5.63E-05 | 0.001313186 | 0.000765234 | XCL1/AGER/EBI3/MDK/TNFRSF13C           | 5     |
| BP       | GO:1904019 | epithelial cell apoptotic process                                      | 4/35      | 111/17913 | 6.30E-05 | 0.001435161 | 0.000836312 | MDK/KDR/TEK/BID                        | 4     |
| BP       | GO:0038084 | vascular endothelial growth factor signaling pathway                   | 3/35      | 40/17913  | 6.42E-05 | 0.001435161 | 0.000836312 | FLT1/KDR/NRP1                          | 3     |
| BP       | GO:0051281 | positive regulation of release of sequestered calcium ion into cytosol | 3/35      | 40/17913  | 6.42E-05 | 0.001435161 | 0.000836312 | XCL1/CD19/CX3CL1                       | 3     |
| BP       | GO:0001952 | regulation of cell-matrix adhesion                                     | 4/35      | 117/17913 | 7.74E-05 | 0.001705023 | 0.000993569 | CX3CL1/KDR/NRP1/TEK                    | 4     |
| BP       | GO:0002687 | positive regulation of leukocyte migration                             | 4/35      | 121/17913 | 8.82E-05 | 0.001890865 | 0.001101865 | XCL1/AGER/MDK/PDGF/D                   | 4     |
| BP       | GO:0045765 | regulation of angiogenesis                                             | 6/35      | 383/17913 | 8.82E-05 | 0.001890865 | 0.001101865 | CX3CL1/MDK/FLT1/KDR/NRP1/TEK           | 6     |
| BP       | GO:0071675 | regulation of mononuclear cell migration                               | 3/35      | 45/17913  | 9.17E-05 | 0.001938281 | 0.001129495 | AGER/MDK/PDGF/D                        | 3     |
| BP       | GO:0022407 | regulation of cell-cell adhesion                                       | 6/35      | 389/17913 | 9.61E-05 | 0.001991093 | 0.00116027  | XCL1/AGER/CX3CL1/EBI3/MDK/TNFRSF13C    | 6     |
| BP       | GO:0045687 | positive regulation of glial cell differentiation                      | 3/35      | 46/17913  | 9.79E-05 | 0.001991093 | 0.00116027  | AGER/IL34/MDK                          | 3     |

Table S3. Gene ontology analysis of prognostic-associated immune genes.

| ONTOLOGY | ID         | Description                                                      | GeneRatio | BgRatio   | pvalue      | p.adjust    | qvalue      | geneID                                  | Count |
|----------|------------|------------------------------------------------------------------|-----------|-----------|-------------|-------------|-------------|-----------------------------------------|-------|
| BP       | GO:1904036 | negative regulation of epithelial cell apoptotic process         | 3/35      | 46/17913  | 9.79E-05    | 0.001991093 | 0.00116027  | MDK/KDR/TEK                             | 3     |
| BP       | GO:0014911 | positive regulation of smooth muscle cell migration              | 3/35      | 47/17913  | 0.000104459 | 0.002097118 | 0.001222055 | MDK/PDGFD/NRP1                          | 3     |
| BP       | GO:0050730 | regulation of peptidyl-tyrosine phosphorylation                  | 5/35      | 245/17913 | 0.000106675 | 0.002114831 | 0.001232376 | IL11/PDGFD/TGFA/NRP1/<br>SHC1           | 5     |
| BP       | GO:0043406 | positive regulation of MAP kinase activity                       | 5/35      | 250/17913 | 0.000117288 | 0.002296526 | 0.001338255 | AGER/TGFA/FLT1/INSR/<br>SHC1            | 5     |
| BP       | GO:0010524 | positive regulation of calcium ion transport into cytosol        | 3/35      | 54/17913  | 0.000158301 | 0.003061774 | 0.001784189 | XCL1/CD19/CX3CL1                        | 3     |
| BP       | GO:0071670 | smooth muscle cell chemotaxis                                    | 2/35      | 10/17913  | 0.000165264 | 0.003157939 | 0.001840227 | MDK/PDGFD                               | 2     |
| BP       | GO:0045834 | positive regulation of lipid metabolic process                   | 4/35      | 144/17913 | 0.000172781 | 0.003262273 | 0.001901026 | VAV3/CD19/FLT1/TEK                      | 4     |
| BP       | GO:0042129 | regulation of T cell proliferation                               | 4/35      | 149/17913 | 0.000196972 | 0.003675272 | 0.002141693 | XCL1/AGER/EBI3/TNFRS<br>F13C            | 4     |
| BP       | GO:0001819 | positive regulation of cytokine production                       | 6/35      | 446/17913 | 0.000202558 | 0.003735551 | 0.00217682  | XCL1/AGER/CX3CL1/EBI<br>3/MDK/TNFRSF13C | 6     |
| BP       | GO:0042063 | gliogenesis                                                      | 5/35      | 285/17913 | 0.000216107 | 0.003904605 | 0.002275332 | NDRG1/AGER/CX3CL1/I<br>L34/MDK          | 5     |
| BP       | GO:0030593 | neutrophil chemotaxis                                            | 3/35      | 60/17913  | 0.000216649 | 0.003904605 | 0.002275332 | XCL1/VAV3/MDK                           | 3     |
| BP       | GO:0051893 | regulation of focal adhesion assembly                            | 3/35      | 61/17913  | 0.00022755  | 0.004009944 | 0.002336716 | KDR/NRP1/TEK                            | 3     |
| BP       | GO:0090109 | regulation of cell-substrate junction assembly                   | 3/35      | 61/17913  | 0.00022755  | 0.004009944 | 0.002336716 | KDR/NRP1/TEK                            | 3     |
| BP       | GO:0001906 | cell killing                                                     | 4/35      | 156/17913 | 0.000234829 | 0.004092727 | 0.002384957 | ULBP2/HAMP/XCL1/AGE<br>R                | 4     |
| BP       | GO:0045078 | positive regulation of interferon-gamma biosynthetic process     | 2/35      | 12/17913  | 0.000241793 | 0.004168299 | 0.002428995 | EBI3/TNFRSF13C                          | 2     |
| BP       | GO:0002449 | lymphocyte mediated immunity                                     | 5/35      | 293/17913 | 0.000245664 | 0.0041895   | 0.002441349 | ULBP2/XCL1/AGER/CD1<br>9/IGKV1-12       | 5     |
| BP       | GO:0042108 | positive regulation of cytokine biosynthetic process             | 3/35      | 63/17913  | 0.000250406 | 0.004224938 | 0.002462    | AGER/EBI3/TNFRSF13C                     | 3     |
| BP       | GO:1903037 | regulation of leukocyte cell-cell adhesion                       | 5/35      | 295/17913 | 0.000253513 | 0.004232332 | 0.002466309 | XCL1/AGER/EBI3/MDK/T<br>NFRSF13C        | 5     |
| BP       | GO:0035924 | cellular response to vascular endothelial growth factor stimulus | 3/35      | 65/17913  | 0.000274698 | 0.004538238 | 0.00264457  | FLT1/KDR/NRP1                           | 3     |
| BP       | GO:0060347 | heart trabecula formation                                        | 2/35      | 13/17913  | 0.000285405 | 0.004618895 | 0.002691571 | TEK/TGFBR3                              | 2     |
| BP       | GO:0090594 | inflammatory response to wounding                                | 2/35      | 13/17913  | 0.000285405 | 0.004618895 | 0.002691571 | AGER/MDK                                | 2     |
| BP       | GO:1903391 | regulation of adherens junction organization                     | 3/35      | 67/17913  | 0.000300464 | 0.004813491 | 0.002804968 | KDR/NRP1/TEK                            | 3     |
| BP       | GO:0050863 | regulation of T cell activation                                  | 5/35      | 307/17913 | 0.000304699 | 0.004832528 | 0.002816061 | XCL1/AGER/EBI3/MDK/T<br>NFRSF13C        | 5     |
| BP       | GO:0050728 | negative regulation of inflammatory response                     | 4/35      | 170/17913 | 0.000325864 | 0.005117033 | 0.002981851 | AGER/CX3CL1/MDK/TE<br>K                 | 4     |



Table S3. Gene ontology analysis of prognostic-associated immune genes.

| ONTOLOGY | ID         | Description                                                     | GeneRatio | BgRatio   | pvalue      | p.adjust    | qvalue      | geneID                       | Count |
|----------|------------|-----------------------------------------------------------------|-----------|-----------|-------------|-------------|-------------|------------------------------|-------|
| BP       | GO:0002523 | leukocyte migration involved in inflammatory response           | 2/35      | 14/17913  | 0.000332564 | 0.005171037 | 0.003013321 | CX3CL1/MDK                   | 2     |
| BP       | GO:1901652 | response to peptide                                             | 6/35      | 491/17913 | 0.000339637 | 0.005214878 | 0.003038868 | AGER/KL/INSR/TEK/TGFBR3/SHC1 | 6     |
| BP       | GO:1904427 | positive regulation of calcium ion transmembrane transport      | 3/35      | 70/17913  | 0.000341959 | 0.005214878 | 0.003038868 | XCL1/CD19/CX3CL1             | 3     |
| BP       | GO:0042100 | B cell proliferation                                            | 3/35      | 71/17913  | 0.000356569 | 0.005385885 | 0.003138519 | VAV3/CD19/TNFRSF13C          | 3     |
| BP       | GO:1990266 | neutrophil migration                                            | 3/35      | 72/17913  | 0.000371575 | 0.005475902 | 0.003190975 | XCL1/VAV3/MDK                | 3     |
| BP       | GO:0031589 | cell-substrate adhesion                                         | 5/35      | 322/17913 | 0.000379323 | 0.005475902 | 0.003190975 | CX3CL1/MDK/KDR/NRP1/TEK      | 5     |
| BP       | GO:0043405 | regulation of MAP kinase activity                               | 5/35      | 322/17913 | 0.000379323 | 0.005475902 | 0.003190975 | AGER/TGFA/FLT1/INSR/SHC1     | 5     |
| BP       | GO:0071902 | positive regulation of protein serine/threonine kinase activity | 5/35      | 322/17913 | 0.000379323 | 0.005475902 | 0.003190975 | AGER/TGFA/FLT1/INSR/SHC1     | 5     |
| BP       | GO:0042098 | T cell proliferation                                            | 4/35      | 177/17913 | 0.000379791 | 0.005475902 | 0.003190975 | XCL1/AGER/EBI3/TNFRSF13C     | 4     |
| BP       | GO:0048638 | regulation of developmental growth                              | 5/35      | 325/17913 | 0.000395775 | 0.005654952 | 0.003295313 | HAMP/SEMA3G/INSR/NRP1/TGFBR3 | 5     |
| BP       | GO:0007159 | leukocyte cell-cell adhesion                                    | 5/35      | 328/17913 | 0.000412764 | 0.005845027 | 0.003406075 | XCL1/AGER/EBI3/MDK/TNFRSF13C | 5     |
| BP       | GO:0048639 | positive regulation of developmental growth                     | 4/35      | 183/17913 | 0.000430867 | 0.005981274 | 0.00348547  | HAMP/INSR/NRP1/TGFB R3       | 4     |
| BP       | GO:0014015 | positive regulation of gliogenesis                              | 3/35      | 76/17913  | 0.000435654 | 0.005981274 | 0.00348547  | AGER/IL34/MDK                | 3     |
| BP       | GO:0045072 | regulation of interferon-gamma biosynthetic process             | 2/35      | 16/17913  | 0.00043747  | 0.005981274 | 0.00348547  | EBI3/TNFRSF13C               | 2     |
| BP       | GO:2000251 | positive regulation of actin cytoskeleton reorganization        | 2/35      | 16/17913  | 0.00043747  | 0.005981274 | 0.00348547  | NRP1/TEK                     | 2     |
| BP       | GO:0045685 | regulation of glial cell differentiation                        | 3/35      | 77/17913  | 0.00045271  | 0.006136742 | 0.003576066 | AGER/IL34/MDK                | 3     |
| BP       | GO:0002685 | regulation of leukocyte migration                               | 4/35      | 186/17913 | 0.000458165 | 0.006158053 | 0.003588485 | XCL1/AGER/MDK/PDGF D         | 4     |
| BP       | GO:0051279 | regulation of release of sequestered calcium ion into cytosol   | 3/35      | 78/17913  | 0.00047019  | 0.006266568 | 0.00365172  | XCL1/CD19/CX3CL1             | 3     |
| BP       | GO:0042095 | interferon-gamma biosynthetic process                           | 2/35      | 17/17913  | 0.000495192 | 0.006544781 | 0.003813844 | EBI3/TNFRSF13C               | 2     |
| BP       | GO:0032102 | negative regulation of response to external stimulus            | 5/35      | 343/17913 | 0.000506141 | 0.006634208 | 0.003865955 | AGER/CX3CL1/MDK/NRP1/TEK     | 5     |
| BP       | GO:0007045 | cell-substrate adherens junction assembly                       | 3/35      | 81/17913  | 0.000525213 | 0.006717648 | 0.003914578 | KDR/NRP1/TEK                 | 3     |
| BP       | GO:0014068 | positive regulation of phosphatidylinositol 3-kinase signaling  | 3/35      | 81/17913  | 0.000525213 | 0.006717648 | 0.003914578 | FLT1/KDR/TEK                 | 3     |
| BP       | GO:0048041 | focal adhesion assembly                                         | 3/35      | 81/17913  | 0.000525213 | 0.006717648 | 0.003914578 | KDR/NRP1/TEK                 | 3     |
| BP       | GO:0038083 | peptidyl-tyrosine autophosphorylation                           | 2/35      | 18/17913  | 0.000556407 | 0.00694852  | 0.004049114 | INSR/KDR                     | 2     |

Table S3. Gene ontology analysis of prognostic-associated immune genes.

| ONTOLOGY | ID         | Description                                                       | GeneRatio | BgRatio   | pvalue      | p.adjust    | qvalue      | geneID                   | Count |
|----------|------------|-------------------------------------------------------------------|-----------|-----------|-------------|-------------|-------------|--------------------------|-------|
| BP       | GO:0046641 | positive regulation of alpha-beta T cell proliferation            | 2/35      | 18/17913  | 0.000556407 | 0.00694852  | 0.004049114 | XCL1/EBI3                | 2     |
| BP       | GO:0060977 | coronary vasculature morphogenesis                                | 2/35      | 18/17913  | 0.000556407 | 0.00694852  | 0.004049114 | NRP1/TGFBR3              | 2     |
| BP       | GO:0051781 | positive regulation of cell division                              | 3/35      | 84/17913  | 0.000584204 | 0.007182535 | 0.004185482 | MDK/PDGFD/TGFA           | 3     |
| BP       | GO:0071621 | granulocyte chemotaxis                                            | 3/35      | 84/17913  | 0.000584204 | 0.007182535 | 0.004185482 | XCL1/VAV3/MDK            | 3     |
| BP       | GO:0034764 | positive regulation of transmembrane transport                    | 4/35      | 199/17913 | 0.000590889 | 0.007208847 | 0.004200815 | XCL1/CD19/CX3CL1/INSR    | 4     |
| BP       | GO:0014910 | regulation of smooth muscle cell migration                        | 3/35      | 85/17913  | 0.000604768 | 0.007321854 | 0.004266667 | MDK/PDGFD/NRP1           | 3     |
| BP       | GO:0034446 | substrate adhesion-dependent cell spreading                       | 3/35      | 86/17913  | 0.000625791 | 0.007518975 | 0.004381536 | MDK/NRP1/TEK             | 3     |
| BP       | GO:1904035 | regulation of epithelial cell apoptotic process                   | 3/35      | 88/17913  | 0.000669226 | 0.007980396 | 0.00465042  | MDK/KDR/TEK              | 3     |
| BP       | GO:0060216 | definitive hemopoiesis                                            | 2/35      | 20/17913  | 0.00068927  | 0.008097648 | 0.004718746 | TEK/TGFBR3               | 2     |
| BP       | GO:0071636 | positive regulation of transforming growth factor beta production | 2/35      | 20/17913  | 0.00068927  | 0.008097648 | 0.004718746 | XCL1/CX3CL1              | 2     |
| BP       | GO:0034333 | adherens junction assembly                                        | 3/35      | 90/17913  | 0.000714542 | 0.008212053 | 0.004785414 | KDR/NRP1/TEK             | 3     |
| BP       | GO:0046634 | regulation of alpha-beta T cell activation                        | 3/35      | 90/17913  | 0.000714542 | 0.008212053 | 0.004785414 | XCL1/AGER/EBI3           | 3     |
| BP       | GO:1901888 | regulation of cell junction assembly                              | 3/35      | 90/17913  | 0.000714542 | 0.008212053 | 0.004785414 | KDR/NRP1/TEK             | 3     |
| BP       | GO:0046777 | protein autophosphorylation                                       | 4/35      | 210/17913 | 0.000722875 | 0.008248055 | 0.004806393 | FLT1/INSR/KDR/TEK        | 4     |
| BP       | GO:0014909 | smooth muscle cell migration                                      | 3/35      | 91/17913  | 0.000737915 | 0.008359523 | 0.004871349 | MDK/PDGFD/NRP1           | 3     |
| BP       | GO:0010001 | glial cell differentiation                                        | 4/35      | 212/17913 | 0.000748941 | 0.00842426  | 0.004909073 | NDRG1/AGER/IL34/MDK      | 4     |
| BP       | GO:0007160 | cell-matrix adhesion                                              | 4/35      | 214/17913 | 0.000775667 | 0.008663437 | 0.005048449 | CX3CL1/KDR/NRP1/TEK      | 4     |
| BP       | GO:0032649 | regulation of interferon-gamma production                         | 3/35      | 93/17913  | 0.000786113 | 0.008693047 | 0.005065704 | XCL1/EBI3/TNFRSF13C      | 3     |
| BP       | GO:0042113 | B cell activation                                                 | 4/35      | 215/17913 | 0.00078928  | 0.008693047 | 0.005065704 | VAV3/CD19/IL11/TNFRSF13C | 4     |
| BP       | GO:0048714 | positive regulation of oligodendrocyte differentiation            | 2/35      | 22/17913  | 0.000835954 | 0.009080983 | 0.005291765 | IL34/MDK                 | 2     |
| BP       | GO:0050927 | positive regulation of positive chemotaxis                        | 2/35      | 22/17913  | 0.000835954 | 0.009080983 | 0.005291765 | AGER/KDR                 | 2     |
| BP       | GO:0007044 | cell-substrate junction assembly                                  | 3/35      | 96/17913  | 0.000862096 | 0.009301253 | 0.005420124 | KDR/NRP1/TEK             | 3     |
| BP       | GO:0001909 | leukocyte mediated cytotoxicity                                   | 3/35      | 97/17913  | 0.000888423 | 0.00952053  | 0.005547903 | ULBP2/XCL1/AGER          | 3     |
| BP       | GO:0030517 | negative regulation of axon extension                             | 2/35      | 23/17913  | 0.000914447 | 0.009549968 | 0.005565058 | SEMA3G/NRP1              | 2     |
| BP       | GO:0050926 | regulation of positive chemotaxis                                 | 2/35      | 23/17913  | 0.000914447 | 0.009549968 | 0.005565058 | AGER/KDR                 | 2     |
| BP       | GO:0071677 | positive regulation of mononuclear cell migration                 | 2/35      | 23/17913  | 0.000914447 | 0.009549968 | 0.005565058 | AGER/PDGFD               | 2     |
| BP       | GO:0010522 | regulation of calcium ion transport into cytosol                  | 3/35      | 98/17913  | 0.000915255 | 0.009549968 | 0.005565058 | XCL1/CD19/CX3CL1         | 3     |

Table S3. Gene ontology analysis of prognostic-associated immune genes.

| ONTOLOGY | ID         | Description                                                       | GeneRatio | BgRatio   | pvalue      | p.adjust    | qvalue      | geneID                        | Count |
|----------|------------|-------------------------------------------------------------------|-----------|-----------|-------------|-------------|-------------|-------------------------------|-------|
| BP       | GO:0097530 | granulocyte migration                                             | 3/35      | 100/17913 | 0.000970454 | 0.010001397 | 0.005828119 | XCL1/VAV3/MDK                 | 3     |
| BP       | GO:0001914 | regulation of T cell mediated cytotoxicity                        | 2/35      | 24/17913  | 0.000996356 | 0.010001397 | 0.005828119 | XCL1/AGER                     | 2     |
| BP       | GO:0030325 | adrenal gland development                                         | 2/35      | 24/17913  | 0.000996356 | 0.010001397 | 0.005828119 | MDK/INSR                      | 2     |
| BP       | GO:0060343 | trabecula formation                                               | 2/35      | 24/17913  | 0.000996356 | 0.010001397 | 0.005828119 | TEK/TGFBR3                    | 2     |
| BP       | GO:0072012 | glomerulus vasculature development                                | 2/35      | 24/17913  | 0.000996356 | 0.010001397 | 0.005828119 | PDGFD/TEK                     | 2     |
| BP       | GO:0090023 | positive regulation of neutrophil chemotaxis                      | 2/35      | 24/17913  | 0.000996356 | 0.010001397 | 0.005828119 | XCL1/MDK                      | 2     |
| BP       | GO:0014812 | muscle cell migration                                             | 3/35      | 103/17913 | 0.001057142 | 0.010489275 | 0.00611242  | MDK/PDGFD/NRP1                | 3     |
| BP       | GO:0043434 | response to peptide hormone                                       | 5/35      | 404/17913 | 0.001058187 | 0.010489275 | 0.00611242  | KL/INSR/TEK/TGFBR3/S<br>HC1   | 5     |
| BP       | GO:0007176 | regulation of epidermal growth factor-activated receptor activity | 2/35      | 25/17913  | 0.001081669 | 0.010655445 | 0.006209252 | TGFA/SHC1                     | 2     |
| BP       | GO:0032609 | interferon-gamma production                                       | 3/35      | 105/17913 | 0.001117572 | 0.010941165 | 0.00637575  | XCL1/EBI3/TNFRSF13C           | 3     |
| BP       | GO:0031348 | negative regulation of defense response                           | 4/35      | 237/17913 | 0.001133469 | 0.011028724 | 0.006426773 | AGER/CX3CL1/MDK/TE<br>K       | 4     |
| BP       | GO:0051402 | neuron apoptotic process                                          | 4/35      | 238/17913 | 0.001151254 | 0.011133464 | 0.006487809 | CX3CL1/MDK/NRP1/BID           | 4     |
| BP       | GO:0071624 | positive regulation of granulocyte chemotaxis                     | 2/35      | 26/17913  | 0.001170372 | 0.01124976  | 0.006555578 | XCL1/MDK                      | 2     |
| BP       | GO:0046640 | regulation of alpha-beta T cell proliferation                     | 2/35      | 27/17913  | 0.001262454 | 0.011983785 | 0.006983316 | XCL1/EBI3                     | 2     |
| BP       | GO:1902624 | positive regulation of neutrophil migration                       | 2/35      | 27/17913  | 0.001262454 | 0.011983785 | 0.006983316 | XCL1/MDK                      | 2     |
| BP       | GO:0042035 | regulation of cytokine biosynthetic process                       | 3/35      | 110/17913 | 0.001278088 | 0.011983785 | 0.006983316 | AGER/EBI3/TNFRSF13C           | 3     |
| BP       | GO:0050864 | regulation of B cell activation                                   | 3/35      | 110/17913 | 0.001278088 | 0.011983785 | 0.006983316 | VAV3/CD19/TNFRSF13C           | 3     |
| BP       | GO:0048732 | gland development                                                 | 5/35      | 422/17913 | 0.001284517 | 0.011983785 | 0.006983316 | HAMP/MDK/INSR/NRP1/<br>TGFBR3 | 5     |
| BP       | GO:0021782 | glial cell development                                            | 3/35      | 111/17913 | 0.00131184  | 0.01216712  | 0.007090152 | NDRG1/AGER/MDK                | 3     |
| BP       | GO:0051209 | release of sequestered calcium ion into cytosol                   | 3/35      | 112/17913 | 0.001346148 | 0.012340988 | 0.00719147  | XCL1/CD19/CX3CL1              | 3     |
| BP       | GO:0051283 | negative regulation of sequestering of calcium ion                | 3/35      | 112/17913 | 0.001346148 | 0.012340988 | 0.00719147  | XCL1/CD19/CX3CL1              | 3     |
| BP       | GO:0003007 | heart morphogenesis                                               | 4/35      | 249/17913 | 0.001360041 | 0.012396693 | 0.007223931 | INSR/NRP1/TEK/TGFBR3          | 4     |
| BP       | GO:0051282 | regulation of sequestering of calcium ion                         | 3/35      | 114/17913 | 0.001416452 | 0.0128371   | 0.007480569 | XCL1/CD19/CX3CL1              | 3     |
| BP       | GO:0014066 | regulation of phosphatidylinositol 3-kinase signaling             | 3/35      | 117/17913 | 0.001526175 | 0.013675217 | 0.007968966 | FLT1/KDR/TEK                  | 3     |
| BP       | GO:0051208 | sequestering of calcium ion                                       | 3/35      | 117/17913 | 0.001526175 | 0.013675217 | 0.007968966 | XCL1/CD19/CX3CL1              | 3     |
| BP       | GO:0001569 | branching involved in blood vessel morphogenesis                  | 2/35      | 30/17913  | 0.001558838 | 0.013735094 | 0.008003858 | MDK/NRP1                      | 2     |

Table S3. Gene ontology analysis of prognostic-associated immune genes.

| ONTOLOGY | ID         | Description                                               | GeneRatio | BgRatio   | pvalue      | p.adjust    | qvalue      | geneID                       | Count |
|----------|------------|-----------------------------------------------------------|-----------|-----------|-------------|-------------|-------------|------------------------------|-------|
| BP       | GO:0046633 | alpha-beta T cell proliferation                           | 2/35      | 30/17913  | 0.001558838 | 0.013735094 | 0.008003858 | XCL1/EBI3                    | 2     |
| BP       | GO:0090022 | regulation of neutrophil chemotaxis                       | 2/35      | 30/17913  | 0.001558838 | 0.013735094 | 0.008003858 | XCL1/MDK                     | 2     |
| BP       | GO:0042110 | T cell activation                                         | 5/35      | 443/17913 | 0.001591931 | 0.013949184 | 0.008128615 | XCL1/AGER/EBI3/MDK/TNFRSF13C | 5     |
| BP       | GO:0051928 | positive regulation of calcium ion transport              | 3/35      | 119/17913 | 0.001602209 | 0.013962103 | 0.008136143 | XCL1/CD19/CX3CL1             | 3     |
| BP       | GO:0042089 | cytokine biosynthetic process                             | 3/35      | 120/17913 | 0.001641101 | 0.01419132  | 0.008269715 | AGER/EBI3/TNFRSF13C          | 3     |
| BP       | GO:0035767 | endothelial cell chemotaxis                               | 2/35      | 31/17913  | 0.001664304 | 0.01419132  | 0.008269715 | KDR/NRP1                     | 2     |
| BP       | GO:0061036 | positive regulation of cartilage development              | 2/35      | 31/17913  | 0.001664304 | 0.01419132  | 0.008269715 | BMP1/MDK                     | 2     |
| BP       | GO:1903978 | regulation of microglial cell activation                  | 2/35      | 31/17913  | 0.001664304 | 0.01419132  | 0.008269715 | AGER/CX3CL1                  | 2     |
| BP       | GO:0042107 | cytokine metabolic process                                | 3/35      | 121/17913 | 0.001680581 | 0.014253485 | 0.00830594  | AGER/EBI3/TNFRSF13C          | 3     |
| BP       | GO:0045927 | positive regulation of growth                             | 4/35      | 266/17913 | 0.001732859 | 0.014618696 | 0.008518759 | HAMP/INSR/NRP1/TGFBR3        | 4     |
| BP       | GO:0061384 | heart trabecula morphogenesis                             | 2/35      | 32/17913  | 0.001773084 | 0.014878894 | 0.008670385 | TEK/TGFBR3                   | 2     |
| BP       | GO:0050769 | positive regulation of neurogenesis                       | 5/35      | 455/17913 | 0.001790316 | 0.014944425 | 0.008708572 | AGER/CX3CL1/IL34/MDK/NRP1    | 5     |
| BP       | GO:0001913 | T cell mediated cytotoxicity                              | 2/35      | 33/17913  | 0.001885166 | 0.015505965 | 0.009035798 | XCL1/AGER                    | 2     |
| BP       | GO:2000352 | negative regulation of endothelial cell apoptotic process | 2/35      | 33/17913  | 0.001885166 | 0.015505965 | 0.009035798 | KDR/TEK                      | 2     |
| BP       | GO:0097553 | calcium ion transmembrane import into cytosol             | 3/35      | 126/17913 | 0.001886918 | 0.015505965 | 0.009035798 | XCL1/CD19/CX3CL1             | 3     |
| BP       | GO:0008286 | insulin receptor signaling pathway                        | 3/35      | 128/17913 | 0.001973681 | 0.016052608 | 0.009354344 | KL/INSR/SHC1                 | 3     |
| BP       | GO:0014013 | regulation of gliogenesis                                 | 3/35      | 128/17913 | 0.001973681 | 0.016052608 | 0.009354344 | AGER/IL34/MDK                | 3     |
| BP       | GO:0032735 | positive regulation of interleukin-12 production          | 2/35      | 34/17913  | 0.002000537 | 0.016083012 | 0.009372061 | AGER/MDK                     | 2     |
| BP       | GO:1902622 | regulation of neutrophil migration                        | 2/35      | 34/17913  | 0.002000537 | 0.016083012 | 0.009372061 | XCL1/MDK                     | 2     |
| BP       | GO:0003206 | cardiac chamber morphogenesis                             | 3/35      | 129/17913 | 0.002017982 | 0.016083012 | 0.009372061 | NRP1/TEK/TGFBR3              | 3     |
| BP       | GO:0010595 | positive regulation of endothelial cell migration         | 3/35      | 129/17913 | 0.002017982 | 0.016083012 | 0.009372061 | KDR/NRP1/TEK                 | 3     |
| BP       | GO:0001889 | liver development                                         | 3/35      | 130/17913 | 0.002062899 | 0.016358792 | 0.009532767 | HAMP/MDK/TGFBR3              | 3     |
| BP       | GO:0048246 | macrophage chemotaxis                                     | 2/35      | 35/17913  | 0.002119185 | 0.016721529 | 0.009744144 | CX3CL1/MDK                   | 2     |
| BP       | GO:0046631 | alpha-beta T cell activation                              | 3/35      | 133/17913 | 0.002201382 | 0.017198976 | 0.010022367 | XCL1/AGER/EBI3               | 3     |
| BP       | GO:0061008 | hepaticobiliary system development                        | 3/35      | 133/17913 | 0.002201382 | 0.017198976 | 0.010022367 | HAMP/MDK/TGFBR3              | 3     |
| BP       | GO:0071900 | regulation of protein serine/threonine kinase activity    | 5/35      | 479/17913 | 0.002241018 | 0.017229911 | 0.010040394 | AGER/TGFA/FLT1/INSR/SHC1     | 5     |
| BP       | GO:0071634 | regulation of transforming growth factor beta production  | 2/35      | 36/17913  | 0.002241097 | 0.017229911 | 0.010040394 | XCL1/CX3CL1                  | 2     |

Table S3. Gene ontology analysis of prognostic-associated immune genes.

| ONTOLOGY | ID         | Description                                                                                                                             | GeneRatio | BgRatio   | pvalue      | p.adjust    | qvalue      | geneID                  | Count |
|----------|------------|-----------------------------------------------------------------------------------------------------------------------------------------|-----------|-----------|-------------|-------------|-------------|-------------------------|-------|
| BP       | GO:1900026 | positive regulation of substrate adhesion-dependent cell spreading                                                                      | 2/35      | 36/17913  | 0.002241097 | 0.017229911 | 0.010040394 | MDK/NRP1                | 2     |
| BP       | GO:0034332 | adherens junction organization                                                                                                          | 3/35      | 134/17913 | 0.002248797 | 0.017229911 | 0.010040394 | KDR/NRP1/TEK            | 3     |
| BP       | GO:0002822 | regulation of adaptive immune response based on somatic recombination of immune receptors built from immunoglobulin superfamily domains | 3/35      | 135/17913 | 0.002296843 | 0.017513427 | 0.010205608 | XCL1/AGER/TNFRSF13C     | 3     |
| BP       | GO:0002521 | leukocyte differentiation                                                                                                               | 5/35      | 485/17913 | 0.002365608 | 0.017951453 | 0.010460859 | AGER/CD19/IL11/IL34/MDK | 5     |
| BP       | GO:0014065 | phosphatidylinositol 3-kinase signaling                                                                                                 | 3/35      | 138/17913 | 0.002444802 | 0.018464074 | 0.010759579 | FLT1/KDR/TEK            | 3     |
| BP       | GO:0071604 | transforming growth factor beta production                                                                                              | 2/35      | 38/17913  | 0.002494664 | 0.018575291 | 0.010824388 | XCL1/CX3CL1             | 2     |
| BP       | GO:0090050 | positive regulation of cell migration involved in sprouting angiogenesis                                                                | 2/35      | 38/17913  | 0.002494664 | 0.018575291 | 0.010824388 | KDR/NRP1                | 2     |
| BP       | GO:2001222 | regulation of neuron migration                                                                                                          | 2/35      | 38/17913  | 0.002494664 | 0.018575291 | 0.010824388 | CX3CL1/MDK              | 2     |
| BP       | GO:1904064 | positive regulation of cation transmembrane transport                                                                                   | 3/35      | 140/17913 | 0.002546653 | 0.018873795 | 0.010998336 | XCL1/CD19/CX3CL1        | 3     |
| BP       | GO:0032956 | regulation of actin cytoskeleton organization                                                                                           | 4/35      | 297/17913 | 0.002586517 | 0.019080072 | 0.011118539 | CX3CL1/MDK/NRP1/TEK     | 4     |
| BP       | GO:0030890 | positive regulation of B cell proliferation                                                                                             | 2/35      | 39/17913  | 0.002626294 | 0.019194942 | 0.011185477 | VAV3/TNFRSF13C          | 2     |
| BP       | GO:0048713 | regulation of oligodendrocyte differentiation                                                                                           | 2/35      | 39/17913  | 0.002626294 | 0.019194942 | 0.011185477 | IL34/MDK                | 2     |
| BP       | GO:1902107 | positive regulation of leukocyte differentiation                                                                                        | 3/35      | 143/17913 | 0.002704306 | 0.019674447 | 0.0114649   | AGER/IL34/MDK           | 3     |
| BP       | GO:1903169 | regulation of calcium ion transmembrane transport                                                                                       | 3/35      | 144/17913 | 0.002758168 | 0.01997468  | 0.011639855 | XCL1/CD19/CX3CL1        | 3     |
| BP       | GO:0060402 | calcium ion transport into cytosol                                                                                                      | 3/35      | 145/17913 | 0.002812691 | 0.020276944 | 0.011815993 | XCL1/CD19/CX3CL1        | 3     |
| BP       | GO:0043524 | negative regulation of neuron apoptotic process                                                                                         | 3/35      | 146/17913 | 0.002867876 | 0.02058123  | 0.01199331  | CX3CL1/MDK/NRP1         | 3     |
| BP       | GO:0000187 | activation of MAPK activity                                                                                                             | 3/35      | 147/17913 | 0.002923727 | 0.02088753  | 0.0121718   | TGFA/INSR/SHC1          | 3     |
| BP       | GO:0042088 | T-helper 1 type immune response                                                                                                         | 2/35      | 42/17913  | 0.003040422 | 0.021623808 | 0.012600852 | XCL1/EBI3               | 2     |
| BP       | GO:0002819 | regulation of adaptive immune response                                                                                                  | 3/35      | 150/17913 | 0.003095302 | 0.021915842 | 0.012771029 | XCL1/AGER/TNFRSF13C     | 3     |
| BP       | GO:2001236 | regulation of extrinsic apoptotic signaling pathway                                                                                     | 3/35      | 151/17913 | 0.003153842 | 0.022231084 | 0.01295473  | CX3CL1/NRP1/BID         | 3     |
| BP       | GO:0001764 | neuron migration                                                                                                                        | 3/35      | 152/17913 | 0.003213062 | 0.022448969 | 0.013081698 | CX3CL1/MDK/NRP1         | 3     |
| BP       | GO:0034767 | positive regulation of ion transmembrane transport                                                                                      | 3/35      | 152/17913 | 0.003213062 | 0.022448969 | 0.013081698 | XCL1/CD19/CX3CL1        | 3     |
| BP       | GO:0050729 | positive regulation of inflammatory response                                                                                            | 3/35      | 153/17913 | 0.003272963 | 0.022767188 | 0.013267134 | AGER/CX3CL1/MDK         | 3     |
| BP       | GO:0007568 | aging                                                                                                                                   | 4/35      | 318/17913 | 0.003306762 | 0.022887475 | 0.013337229 | HAMP/AGER/CX3CL1/KL     | 4     |
| BP       | GO:0071622 | regulation of granulocyte chemotaxis                                                                                                    | 2/35      | 44/17913  | 0.003332416 | 0.022887475 | 0.013337229 | XCL1/MDK                | 2     |
| BP       | GO:0008361 | regulation of cell size                                                                                                                 | 3/35      | 154/17913 | 0.003333548 | 0.022887475 | 0.013337229 | VAV3/SEMA3G/NRP1        | 3     |

Table S3. Gene ontology analysis of prognostic-associated immune genes.

| ONTOLOGY | ID         | Description                                                | GeneRatio | BgRatio   | pvalue      | p.adjust    | qvalue      | geneID                | Count |
|----------|------------|------------------------------------------------------------|-----------|-----------|-------------|-------------|-------------|-----------------------|-------|
| BP       | GO:0060401 | cytosolic calcium ion transport                            | 3/35      | 157/17913 | 0.003519432 | 0.024059565 | 0.014020242 | XCL1/CD19/CX3CL1      | 3     |
| BP       | GO:0099173 | postsynapse organization                                   | 3/35      | 158/17913 | 0.003582778 | 0.024387495 | 0.014211336 | NDRG1/INSR/NRP1       | 3     |
| BP       | GO:0048015 | phosphatidylinositol-mediated signaling                    | 3/35      | 160/17913 | 0.003711563 | 0.025156146 | 0.014659253 | FLT1/KDR/TEK          | 3     |
| BP       | GO:0001101 | response to acid chemical                                  | 4/35      | 330/17913 | 0.003774546 | 0.025474171 | 0.014844576 | HAMP/PDGFD/KDR/TGFBR3 | 4     |
| BP       | GO:0061383 | trabecula morphogenesis                                    | 2/35      | 47/17913  | 0.003794026 | 0.025497138 | 0.014857959 | TEK/TGFBR3            | 2     |
| BP       | GO:0051302 | regulation of cell division                                | 3/35      | 162/17913 | 0.003843152 | 0.02571831  | 0.014986843 | MDK/PDGFD/TGFA        | 3     |
| BP       | GO:0002695 | negative regulation of leukocyte activation                | 3/35      | 163/17913 | 0.003910005 | 0.025807713 | 0.015038941 | XCL1/CX3CL1/MDK       | 3     |
| BP       | GO:0048017 | inositol lipid-mediated signaling                          | 3/35      | 163/17913 | 0.003910005 | 0.025807713 | 0.015038941 | FLT1/KDR/TEK          | 3     |
| BP       | GO:0032653 | regulation of interleukin-10 production                    | 2/35      | 48/17913  | 0.003954145 | 0.025807713 | 0.015038941 | XCL1/AGER             | 2     |
| BP       | GO:0045840 | positive regulation of mitotic nuclear division            | 2/35      | 48/17913  | 0.003954145 | 0.025807713 | 0.015038941 | TGFA/INSR             | 2     |
| BP       | GO:0101023 | vascular endothelial cell proliferation                    | 2/35      | 48/17913  | 0.003954145 | 0.025807713 | 0.015038941 | MDK/FLT1              | 2     |
| BP       | GO:1905562 | regulation of vascular endothelial cell proliferation      | 2/35      | 48/17913  | 0.003954145 | 0.025807713 | 0.015038941 | MDK/FLT1              | 2     |
| BP       | GO:0035272 | exocrine system development                                | 2/35      | 49/17913  | 0.00411737  | 0.026653666 | 0.015531903 | INSR/NRP1             | 2     |
| BP       | GO:0055023 | positive regulation of cardiac muscle tissue growth        | 2/35      | 49/17913  | 0.00411737  | 0.026653666 | 0.015531903 | HAMP/TGFBR3           | 2     |
| BP       | GO:0032970 | regulation of actin filament-based process                 | 4/35      | 341/17913 | 0.004241288 | 0.026853466 | 0.015648333 | CX3CL1/MDK/NRP1/TEK   | 4     |
| BP       | GO:0001774 | microglial cell activation                                 | 2/35      | 50/17913  | 0.004283687 | 0.026853466 | 0.015648333 | AGER/CX3CL1           | 2     |
| BP       | GO:0002269 | leukocyte activation involved in inflammatory response     | 2/35      | 50/17913  | 0.004283687 | 0.026853466 | 0.015648333 | AGER/CX3CL1           | 2     |
| BP       | GO:0014009 | glial cell proliferation                                   | 2/35      | 50/17913  | 0.004283687 | 0.026853466 | 0.015648333 | CX3CL1/IL34           | 2     |
| BP       | GO:0050771 | negative regulation of axonogenesis                        | 2/35      | 50/17913  | 0.004283687 | 0.026853466 | 0.015648333 | SEMA3G/NRP1           | 2     |
| BP       | GO:0060976 | coronary vasculature development                           | 2/35      | 50/17913  | 0.004283687 | 0.026853466 | 0.015648333 | NRP1/TGFBR3           | 2     |
| BP       | GO:1905517 | macrophage migration                                       | 2/35      | 50/17913  | 0.004283687 | 0.026853466 | 0.015648333 | CX3CL1/MDK            | 2     |
| BP       | GO:2000179 | positive regulation of neural precursor cell proliferation | 2/35      | 50/17913  | 0.004283687 | 0.026853466 | 0.015648333 | CX3CL1/MDK            | 2     |
| BP       | GO:0038095 | Fc-epsilon receptor signaling pathway                      | 3/35      | 169/17913 | 0.00432608  | 0.027012454 | 0.01574098  | VAV3/IGKV1-12/SHC1    | 3     |
| BP       | GO:0003205 | cardiac chamber development                                | 3/35      | 170/17913 | 0.00439794  | 0.027353465 | 0.015939697 | NRP1/TEK/TGFBR3       | 3     |
| BP       | GO:0032613 | interleukin-10 production                                  | 2/35      | 51/17913  | 0.004453084 | 0.027374387 | 0.015951889 | XCL1/AGER             | 2     |
| BP       | GO:0150077 | regulation of neuroinflammatory response                   | 2/35      | 51/17913  | 0.004453084 | 0.027374387 | 0.015951889 | AGER/CX3CL1           | 2     |
| BP       | GO:1900024 | regulation of substrate adhesion-dependent cell spreading  | 2/35      | 51/17913  | 0.004453084 | 0.027374387 | 0.015951889 | MDK/NRP1              | 2     |
| BP       | GO:0016064 | immunoglobulin mediated immune response                    | 3/35      | 171/17913 | 0.004470525 | 0.027375492 | 0.015952533 | XCL1/CD19/IGKV1-12    | 3     |

Table S3. Gene ontology analysis of prognostic-associated immune genes.

| ONTOLOGY | ID         | Description                                              | GeneRatio | BgRatio   | pvalue      | p.adjust    | qvalue      | geneID                    | Count |
|----------|------------|----------------------------------------------------------|-----------|-----------|-------------|-------------|-------------|---------------------------|-------|
| BP       | GO:0070997 | neuron death                                             | 4/35      | 347/17913 | 0.004511697 | 0.027521353 | 0.016037531 | CX3CL1/MDK/NRP1/BID       | 4     |
| BP       | GO:0010634 | positive regulation of epithelial cell migration         | 3/35      | 173/17913 | 0.004617876 | 0.027954011 | 0.016289654 | KDR/NRP1/TEK              | 3     |
| BP       | GO:0019724 | B cell mediated immunity                                 | 3/35      | 173/17913 | 0.004617876 | 0.027954011 | 0.016289654 | XCL1/CD19/IGKV1-12        | 3     |
| BP       | GO:0032655 | regulation of interleukin-12 production                  | 2/35      | 53/17913  | 0.004801074 | 0.028733976 | 0.016744163 | AGER/MDK                  | 2     |
| BP       | GO:0050853 | B cell receptor signaling pathway                        | 2/35      | 53/17913  | 0.004801074 | 0.028733976 | 0.016744163 | VAV3/CD19                 | 2     |
| BP       | GO:0060421 | positive regulation of heart growth                      | 2/35      | 53/17913  | 0.004801074 | 0.028733976 | 0.016744163 | HAMP/TGFBR3               | 2     |
| BP       | GO:0001666 | response to hypoxia                                      | 4/35      | 354/17913 | 0.004841672 | 0.028868012 | 0.01682227  | NDRG1/AGER/TEK/TGFB<br>R3 | 4     |
| BP       | GO:0032615 | interleukin-12 production                                | 2/35      | 55/17913  | 0.005161244 | 0.030658174 | 0.017865452 | AGER/MDK                  | 2     |
| BP       | GO:0002040 | sprouting angiogenesis                                   | 3/35      | 181/17913 | 0.00523668  | 0.030990206 | 0.018058937 | KDR/NRP1/TEK              | 3     |
| BP       | GO:1903708 | positive regulation of hemopoiesis                       | 3/35      | 182/17913 | 0.005317373 | 0.031350756 | 0.018269041 | AGER/IL34/MDK             | 3     |
| BP       | GO:1901653 | cellular response to peptide                             | 4/35      | 364/17913 | 0.005340818 | 0.031372363 | 0.018281632 | AGER/KL/INSR/SHC1         | 4     |
| BP       | GO:0036293 | response to decreased oxygen levels                      | 4/35      | 365/17913 | 0.005392563 | 0.031559425 | 0.018390639 | NDRG1/AGER/TEK/TGFB<br>R3 | 4     |
| BP       | GO:0050731 | positive regulation of peptidyl-tyrosine phosphorylation | 3/35      | 184/17913 | 0.005481008 | 0.031959111 | 0.018623548 | IL11/TGFA/NRP1            | 3     |
| BP       | GO:0030888 | regulation of B cell proliferation                       | 2/35      | 57/17913  | 0.005533498 | 0.032146987 | 0.018733029 | VAV3/TNFRSF13C            | 2     |
| BP       | GO:0032233 | positive regulation of actin filament bundle assembly    | 2/35      | 58/17913  | 0.005724127 | 0.033058664 | 0.019264291 | CX3CL1/NRP1               | 2     |
| BP       | GO:0050866 | negative regulation of cell activation                   | 3/35      | 187/17913 | 0.005732114 | 0.033058664 | 0.019264291 | XCL1/CX3CL1/MDK           | 3     |
| BP       | GO:0061900 | glial cell activation                                    | 2/35      | 59/17913  | 0.005917742 | 0.033760934 | 0.019673525 | AGER/CX3CL1               | 2     |
| BP       | GO:2000351 | regulation of endothelial cell apoptotic process         | 2/35      | 59/17913  | 0.005917742 | 0.033760934 | 0.019673525 | KDR/TEK                   | 2     |
| BP       | GO:2000514 | regulation of CD4-positive, alpha-beta T cell activation | 2/35      | 59/17913  | 0.005917742 | 0.033760934 | 0.019673525 | XCL1/AGER                 | 2     |
| BP       | GO:0051785 | positive regulation of nuclear division                  | 2/35      | 60/17913  | 0.006114332 | 0.034757457 | 0.020254229 | TGFA/INSR                 | 2     |
| BP       | GO:0002709 | regulation of T cell mediated immunity                   | 2/35      | 61/17913  | 0.006313884 | 0.035509999 | 0.020692759 | XCL1/AGER                 | 2     |
| BP       | GO:0032835 | glomerulus development                                   | 2/35      | 61/17913  | 0.006313884 | 0.035509999 | 0.020692759 | PDGFD/TEK                 | 2     |
| BP       | GO:0046635 | positive regulation of alpha-beta T cell activation      | 2/35      | 61/17913  | 0.006313884 | 0.035509999 | 0.020692759 | XCL1/EBI3                 | 2     |
| BP       | GO:0031099 | regeneration                                             | 3/35      | 194/17913 | 0.006344677 | 0.035557096 | 0.020720203 | HAMP/MDK/TGFBR3           | 3     |
| BP       | GO:0032729 | positive regulation of interferon-gamma production       | 2/35      | 62/17913  | 0.006516387 | 0.036390807 | 0.021206032 | EBI3/TNFRSF13C            | 2     |
| BP       | GO:0032869 | cellular response to insulin stimulus                    | 3/35      | 197/17913 | 0.006618743 | 0.036832725 | 0.021463551 | KL/INSR/SHC1              | 3     |
| BP       | GO:0001503 | ossification                                             | 4/35      | 388/17913 | 0.006677587 | 0.036901232 | 0.021503472 | BMP1/KL/MDK/TEK           | 4     |
| BP       | GO:0055074 | calcium ion homeostasis                                  | 4/35      | 388/17913 | 0.006677587 | 0.036901232 | 0.021503472 | XCL1/CD19/CX3CL1/KL       | 4     |

Table S3. Gene ontology analysis of prognostic-associated immune genes.

| ONTOLOGY | ID         | Description                                              | GeneRatio | BgRatio   | pvalue      | p.adjust    | qvalue      | geneID                     | Count |
|----------|------------|----------------------------------------------------------|-----------|-----------|-------------|-------------|-------------|----------------------------|-------|
| BP       | GO:0055025 | positive regulation of cardiac muscle tissue development | 2/35      | 63/17913  | 0.006721829 | 0.036975651 | 0.021546838 | HAMP/TGFBR3                | 2     |
| BP       | GO:0070482 | response to oxygen levels                                | 4/35      | 389/17913 | 0.006737682 | 0.036975651 | 0.021546838 | NDRG1/AGER/TEK/TGFB<br>R3  | 4     |
| BP       | GO:0048762 | mesenchymal cell differentiation                         | 3/35      | 199/17913 | 0.006805335 | 0.037090245 | 0.021613616 | MDK/NRP1/TGFBR3            | 3     |
| BP       | GO:0071229 | cellular response to acid chemical                       | 3/35      | 199/17913 | 0.006805335 | 0.037090245 | 0.021613616 | HAMP/PDGFD/KDR             | 3     |
| BP       | GO:0001910 | regulation of leukocyte mediated cytotoxicity            | 2/35      | 64/17913  | 0.006930198 | 0.03751295  | 0.021859939 | XCL1/AGER                  | 2     |
| BP       | GO:0046622 | positive regulation of organ growth                      | 2/35      | 64/17913  | 0.006930198 | 0.03751295  | 0.021859939 | HAMP/TGFBR3                | 2     |
| BP       | GO:0050707 | regulation of cytokine secretion                         | 3/35      | 201/17913 | 0.006995047 | 0.037735187 | 0.021989443 | AGER/CX3CL1/MDK            | 3     |
| BP       | GO:0050808 | synapse organization                                     | 4/35      | 394/17913 | 0.00704357  | 0.037868145 | 0.022066922 | NDRG1/CX3CL1/INSR/N<br>RP1 | 4     |
| BP       | GO:0072577 | endothelial cell apoptotic process                       | 2/35      | 65/17913  | 0.007141484 | 0.038264843 | 0.02229809  | KDR/TEK                    | 2     |
| BP       | GO:0043030 | regulation of macrophage activation                      | 2/35      | 66/17913  | 0.007355674 | 0.039017055 | 0.022736427 | AGER/CX3CL1                | 2     |
| BP       | GO:0061035 | regulation of cartilage development                      | 2/35      | 66/17913  | 0.007355674 | 0.039017055 | 0.022736427 | BMP1/MDK                   | 2     |
| BP       | GO:1903672 | positive regulation of sprouting angiogenesis            | 2/35      | 66/17913  | 0.007355674 | 0.039017055 | 0.022736427 | KDR/NRP1                   | 2     |
| BP       | GO:0051495 | positive regulation of cytoskeleton organization         | 3/35      | 205/17913 | 0.007383886 | 0.039036145 | 0.022747551 | CX3CL1/NRP1/TEK            | 3     |
| BP       | GO:0006644 | phospholipid metabolic process                           | 4/35      | 402/17913 | 0.007551998 | 0.039660494 | 0.023111378 | VAV3/CD19/FLT1/TEK         | 4     |
| BP       | GO:0019216 | regulation of lipid metabolic process                    | 4/35      | 402/17913 | 0.007551998 | 0.039660494 | 0.023111378 | VAV3/CD19/FLT1/TEK         | 4     |
| BP       | GO:1901215 | negative regulation of neuron death                      | 3/35      | 207/17913 | 0.007583038 | 0.039692075 | 0.023129781 | CX3CL1/MDK/NRP1            | 3     |
| BP       | GO:0043523 | regulation of neuron apoptotic process                   | 3/35      | 210/17913 | 0.007887717 | 0.041151048 | 0.02397997  | CX3CL1/MDK/NRP1            | 3     |
| BP       | GO:0097191 | extrinsic apoptotic signaling pathway                    | 3/35      | 213/17913 | 0.008199571 | 0.042575328 | 0.024809941 | CX3CL1/NRP1/BID            | 3     |
| BP       | GO:0072507 | divalent inorganic cation homeostasis                    | 4/35      | 412/17913 | 0.008221057 | 0.042575328 | 0.024809941 | XCL1/CD19/CX3CL1/KL        | 4     |
| BP       | GO:0050871 | positive regulation of B cell activation                 | 2/35      | 70/17913  | 0.008241252 | 0.042575328 | 0.024809941 | VAV3/TNFRSF13C             | 2     |
| BP       | GO:0034329 | cell junction assembly                                   | 3/35      | 214/17913 | 0.008305125 | 0.042765999 | 0.02492105  | KDR/NRP1/TEK               | 3     |
| BP       | GO:0046578 | regulation of Ras protein signal transduction            | 3/35      | 215/17913 | 0.008411481 | 0.043173491 | 0.025158509 | VAV3/NRP1/SHC1             | 3     |
| BP       | GO:0048588 | developmental cell growth                                | 3/35      | 216/17913 | 0.008518642 | 0.04358247  | 0.025396833 | HAMP/SEMA3G/NRP1           | 3     |
| BP       | GO:0051881 | regulation of mitochondrial membrane potential           | 2/35      | 73/17913  | 0.008935374 | 0.045523069 | 0.026527679 | KDR/BID                    | 2     |
| BP       | GO:0002526 | acute inflammatory response                              | 3/35      | 220/17913 | 0.008955358 | 0.045523069 | 0.026527679 | HAMP/CD19/IGKV1-12         | 3     |
| BP       | GO:2001234 | negative regulation of apoptotic signaling pathway       | 3/35      | 223/17913 | 0.009291409 | 0.047080428 | 0.0274352   | CX3CL1/NRP1/BID            | 3     |
| BP       | GO:0031100 | animal organ regeneration                                | 2/35      | 75/17913  | 0.009412208 | 0.047540644 | 0.027703382 | HAMP/TGFBR3                | 2     |
| BP       | GO:0022604 | regulation of cell morphogenesis                         | 4/35      | 430/17913 | 0.009521898 | 0.047942001 | 0.027937265 | SEMA3G/MDK/KDR/NRP<br>1    | 4     |



Table S3. Gene ontology analysis of prognostic-associated immune genes.

| ONTOLOGY | ID         | Description                                                           | GeneRatio | BgRatio   | pvalue      | p.adjust    | qvalue      | geneID                                                      | Count |
|----------|------------|-----------------------------------------------------------------------|-----------|-----------|-------------|-------------|-------------|-------------------------------------------------------------|-------|
| BP       | GO:0030516 | regulation of axon extension                                          | 2/35      | 76/17913  | 0.009654818 | 0.048152645 | 0.028060014 | SEMA3G/NRP1                                                 | 2     |
| BP       | GO:0048844 | artery morphogenesis                                                  | 2/35      | 76/17913  | 0.009654818 | 0.048152645 | 0.028060014 | MDK/NRP1                                                    | 2     |
| BP       | GO:0150076 | neuroinflammatory response                                            | 2/35      | 76/17913  | 0.009654818 | 0.048152645 | 0.028060014 | AGER/CX3CL1                                                 | 2     |
| BP       | GO:0002768 | immune response-regulating cell surface receptor signaling pathway    | 4/35      | 434/17913 | 0.00982823  | 0.048863867 | 0.028474464 | VAV3/CD19/IGKV1-12/SHC1                                     | 4     |
| BP       | GO:0060411 | cardiac septum morphogenesis                                          | 2/35      | 77/17913  | 0.009900207 | 0.049067903 | 0.028593362 | NRP1/TGFBR3                                                 | 2     |
| BP       | GO:0050663 | cytokine secretion                                                    | 3/35      | 230/17913 | 0.010104114 | 0.049830675 | 0.029037853 | AGER/CX3CL1/MDK                                             | 3     |
| BP       | GO:0001570 | vasculogenesis                                                        | 2/35      | 78/17913  | 0.010148366 | 0.049830675 | 0.029037853 | KDR/TGFBR3                                                  | 2     |
| BP       | GO:0010771 | negative regulation of cell morphogenesis involved in differentiation | 2/35      | 78/17913  | 0.010148366 | 0.049830675 | 0.029037853 | SEMA3G/NRP1                                                 | 2     |
| MF       | GO:0048018 | receptor ligand activity                                              | 12/33     | 397/16969 | 5.19E-12    | 5.97E-10    | 3.61E-10    | HAMP/XCL1/CX3CL1/BMP1/EBI3/IL11/IL34/KL/MDK/PDGFD/PMCH/TGFA | 12    |
| MF       | GO:0030545 | receptor regulator activity                                           | 12/33     | 425/16969 | 1.15E-11    | 6.62E-10    | 4.00E-10    | HAMP/XCL1/CX3CL1/BMP1/EBI3/IL11/IL34/KL/MDK/PDGFD/PMCH/TGFA | 12    |
| MF       | GO:0019838 | growth factor binding                                                 | 8/33      | 121/16969 | 6.33E-11    | 2.43E-09    | 1.47E-09    | KL/FLT1/INSR/KDR/NRP1/TEK/TGFBR3/SHC1                       | 8     |
| MF       | GO:0005126 | cytokine receptor binding                                             | 7/33      | 210/16969 | 1.31E-07    | 3.54E-06    | 2.14E-06    | XCL1/CX3CL1/IL11/IL34/TGFBR3/SHC1/BID                       | 7     |
| MF       | GO:0019199 | transmembrane receptor protein kinase activity                        | 5/33      | 65/16969  | 1.54E-07    | 3.54E-06    | 2.14E-06    | FLT1/INSR/KDR/NRP1/TGFR3                                    | 5     |
| MF       | GO:0008083 | growth factor activity                                                | 6/33      | 147/16969 | 3.48E-07    | 6.68E-06    | 4.03E-06    | BMP1/IL11/IL34/MDK/PDGFD/TGFA                               | 6     |
| MF       | GO:0004714 | transmembrane receptor protein tyrosine kinase activity               | 4/33      | 49/16969  | 2.36E-06    | 3.88E-05    | 2.34E-05    | FLT1/INSR/KDR/NRP1                                          | 4     |
| MF       | GO:0004713 | protein tyrosine kinase activity                                      | 5/33      | 120/16969 | 3.29E-06    | 4.74E-05    | 2.86E-05    | FLT1/INSR/KDR/NRP1/TEK                                      | 5     |
| MF       | GO:0005125 | cytokine activity                                                     | 5/33      | 154/16969 | 1.12E-05    | 0.000142489 | 8.61E-05    | XCL1/CX3CL1/BMP1/EBI3/IL34                                  | 5     |
| MF       | GO:0005154 | epidermal growth factor receptor binding                              | 3/33      | 29/16969  | 2.37E-05    | 0.000272034 | 0.000164341 | VAV3/TGFA/SHC1                                              | 3     |
| MF       | GO:0070851 | growth factor receptor binding                                        | 4/33      | 121/16969 | 8.58E-05    | 0.00089674  | 0.000541738 | VAV3/IL11/TGFA/SHC1                                         | 4     |
| MF       | GO:0005159 | insulin-like growth factor receptor binding                           | 2/33      | 15/16969  | 0.000379044 | 0.003632506 | 0.002194466 | INSR/SHC1                                                   | 2     |
| MF       | GO:0017134 | fibroblast growth factor binding                                      | 2/33      | 21/16969  | 0.000752574 | 0.006657385 | 0.004021852 | KL/TGFBR3                                                   | 2     |

Table S3. Gene ontology analysis of prognostic-associated immune genes.

| ONTOLOGY | ID         | Description                | GeneRatio | BgRatio   | pvalue      | p.adjust    | qvalue      | geneID                     | Count |
|----------|------------|----------------------------|-----------|-----------|-------------|-------------|-------------|----------------------------|-------|
| MF       | GO:0005179 | hormone activity           | 3/33      | 103/16969 | 0.001038077 | 0.008527065 | 0.005151362 | HAMP/KL/PMCH               | 3     |
| MF       | GO:0008009 | chemokine activity         | 2/33      | 30/16969  | 0.001541939 | 0.011821533 | 0.007141613 | XCL1/CX3CL1                | 2     |
| MF       | GO:0015026 | coreceptor activity        | 2/33      | 40/16969  | 0.002731481 | 0.019430977 | 0.011738622 | NRP1/TGFBR3                | 2     |
| MF       | GO:0008201 | heparin binding            | 3/33      | 148/16969 | 0.002928243 | 0.019430977 | 0.011738622 | MDK/NRP1/TGFBR3            | 3     |
| MF       | GO:0003823 | antigen binding            | 3/33      | 150/16969 | 0.00304137  | 0.019430977 | 0.011738622 | IGKV1-12/IGLV4-69/IGLV9-49 | 3     |
| MF       | GO:0042379 | chemokine receptor binding | 2/33      | 47/16969  | 0.003753538 | 0.022718781 | 0.013724847 | XCL1/CX3CL1                | 2     |
| MF       | GO:0005539 | glycosaminoglycan binding  | 3/33      | 199/16969 | 0.006691015 | 0.038473336 | 0.023242473 | MDK/NRP1/TGFBR3            | 3     |
| MF       | GO:0001540 | amyloid-beta binding       | 2/33      | 71/16969  | 0.008381408 | 0.045898188 | 0.027727967 | AGER/INSR                  | 2     |
| MF       | GO:1901681 | sulfur compound binding    | 3/33      | 221/16969 | 0.008916765 | 0.046610364 | 0.028158206 | MDK/NRP1/TGFBR3            | 3     |

Table S4. KEGG pathway enrichment of prognostic-associated immune genes

| ID       | Description                                                      | GeneRatio | BgRatio  | pvalue     | p.adjust   | qvalue     | geneID                                    | Count |
|----------|------------------------------------------------------------------|-----------|----------|------------|------------|------------|-------------------------------------------|-------|
| hsa04014 | Ras signaling pathway                                            | 7/25      | 232/7946 | 5.07E-06   | 0.00051197 | 0.00040552 | PDGFD/TGFA/FLT1/INSR/KDR/TEK/S<br>HC1     | 7     |
| hsa04015 | Rap1 signaling pathway                                           | 6/25      | 210/7946 | 3.69E-05   | 0.00186351 | 0.00147605 | VAV3/PDGFD/FLT1/INSR/KDR/TEK              | 6     |
| hsa04151 | PI3K-Akt signaling pathway                                       | 7/25      | 354/7946 | 7.86E-05   | 0.0024666  | 0.00195375 | CD19/PDGFD/TGFA/FLT1/INSR/KDR/<br>TEK     | 7     |
| hsa01521 | EGFR tyrosine kinase inhibitor resistance                        | 4/25      | 79/7946  | 9.77E-05   | 0.0024666  | 0.00195375 | PDGFD/TGFA/KDR/SHC1                       | 4     |
| hsa05323 | Rheumatoid arthritis                                             | 4/25      | 93/7946  | 0.00018428 | 0.00292264 | 0.00231496 | CXCL2/IL11/FLT1/TEK                       | 4     |
| hsa04060 | Cytokine-cytokine receptor interaction                           | 6/25      | 294/7946 | 0.00023807 | 0.00292264 | 0.00231496 | CXCL2/XCL1/CX3CL1/IL11/IL34/TNF<br>RSF13C | 6     |
| hsa04010 | MAPK signaling pathway                                           | 6/25      | 295/7946 | 0.00024251 | 0.00292264 | 0.00231496 | PDGFD/TGFA/FLT1/INSR/KDR/TEK              | 6     |
| hsa04061 | Viral protein interaction with cytokine and<br>cytokine receptor | 4/25      | 100/7946 | 0.00024384 | 0.00292264 | 0.00231496 | CXCL2/XCL1/CX3CL1/IL34                    | 4     |
| hsa04062 | Chemokine signaling pathway                                      | 5/25      | 189/7946 | 0.00026043 | 0.00292264 | 0.00231496 | CXCL2/XCL1/VAV3/CX3CL1/SHC1               | 5     |
| hsa04510 | Focal adhesion                                                   | 5/25      | 199/7946 | 0.00033085 | 0.00334154 | 0.00264676 | VAV3/PDGFD/FLT1/KDR/SHC1                  | 5     |
| hsa04650 | Natural killer cell mediated cytotoxicity                        | 4/25      | 131/7946 | 0.00068225 | 0.00626427 | 0.00496179 | ULBP2/VAV3/SHC1/BID                       | 4     |
| hsa04215 | Apoptosis - multiple species                                     | 2/25      | 32/7946  | 0.00444911 | 0.03601982 | 0.02853055 | BIRC5/BID                                 | 2     |
| hsa04066 | HIF-1 signaling pathway                                          | 3/25      | 109/7946 | 0.00463621 | 0.03601982 | 0.02853055 | FLT1/INSR/TEK                             | 3     |
| hsa05340 | Primary immunodeficiency                                         | 2/25      | 38/7946  | 0.00623356 | 0.04497072 | 0.03562037 | CD19/TNFRSF13C                            | 2     |
